# Supplementary material for: Data Mining Strategies to Improve Multiplex Microbead Immunoassay Tolerance in a Mouse Model of Infectious Diseases
Source: PubMed Central journal article supplement (PMC4304816; doi:10.1371/journal.pone.0116262), 2015-01-23
Supplement: pone.0116262.s001.pdf [file pone.0116262.s001.pdf]

**Table S1: Training Data Set: Mean values of MFI calculated using multivariate statistics.**

| No | Virus                                                | Microbead | Number | (a) Normal Samples (n=305) |     | (b) Background values from single-positive sera that positive for to one etiology but are negative for other eight non-specific infectious agents |     | (c) Positive Samples |     |
|----|------------------------------------------------------|-----------|--------|----------------------------|-----|---------------------------------------------------------------------------------------------------------------------------------------------------|-----|----------------------|-----|
|    |                                                      |           |        | Mean                       | STD | Mean                                                                                                                                              | STD | Mean                 | STD |
| 1  | Epizootic diarrhea virus of infant mice              | EDIM      | 101    | 22                         | 12  | 21                                                                                                                                                | 20  | 1545                 | 28  |
| 2  | Theiler's mouse encephalomyelitis virus/GDVII strain | GD7       | 143    | 12                         | 4   | 14                                                                                                                                                | 17  | 975                  | 28  |
| 3  | Mouse hepatitis virus                                | MHV       | 77     | 12                         | 3   | 15                                                                                                                                                | 47  | 1362                 | 75  |
| 4  | Mouse minute virus                                   | MMV       | 76     | 24                         | 25  | 16                                                                                                                                                | 44  | 1427                 | 74  |
| 5  | Mycoplasma pulmonis                                  | MYC       | 92     | 13                         | 8   | 34                                                                                                                                                | 48  | 6147                 | 120 |
| 6  | Pneumovirus of mouse                                 | PVM       | 102    | 16                         | 13  | 12                                                                                                                                                | 8   | 1162                 | 11  |
| 7  | Respiratory enteric orphan virus (Reo-3 virus)       | REO       | 113    | 14                         | 13  | 17                                                                                                                                                | 18  | 1120                 | 28  |
| 8  | Sendai virus                                         | SEN       | 81     | 13                         | 8   | 49                                                                                                                                                | 96  | 6181                 | 133 |
| 9  | Ectromelia virus                                     | ECTRO     | 71     | 15                         | 5   | 16                                                                                                                                                | 62  | 3447                 | 85  |

**Table S2: Training Data Set**

| Train | EDI    | GD7    | MHV    | MVM  | MYC  | PVM | REO  | SEN  | VAC  | class |
|-------|--------|--------|--------|------|------|-----|------|------|------|-------|
| 1     | 1038.5 | 13     | 15     | 16   | 16.5 | 8   | 8    | 69   | 9    | EDI   |
| 2     | 1119   | 13.5   | 15     | 16   | 19   | 7   | 9    | 78   | 8    | EDI   |
| 3     | 1796   | 15     | 14     | 8    | 7    | 7   | 12   | 8    | 9    | EDI   |
| 4     | 1673   | 14     | 15     | 8.5  | 9    | 7   | 13   | 9    | 9    | EDI   |
| 5     | 1774   | 13     | 14     | 13   | 9    | 9   | 16.5 | 19   | 9    | EDI   |
| 6     | 1279   | 12     | 12     | 10   | 7    | 6   | 11   | 15   | 8    | EDI   |
| 7     | 2221   | 10     | 10     | 6    | 21   | 5   | 5    | 8    | 8    | EDI   |
| 8     | 1390.5 | 9      | 12.5   | 19   | 10   | 3   | 4    | 17   | 1978 | VAC   |
| 9     | 1717   | 12     | 21     | 10   | 7    | 9   | 26   | 8.5  | 7    | EDI   |
| 10    | 2134   | 13     | 21     | 11   | 8    | 9   | 31   | 8.5  | 7    | EDI   |
| 11    | 1151   | 14     | 15     | 10.5 | 9    | 8   | 15.5 | 11.5 | 10   | EDI   |
| 12    | 974    | 11     | 14     | 10   | 7.5  | 7   | 12   | 9    | 9    | EDI   |
| 13    | 2689   | 15.5   | 41     | 14   | 22   | 9   | 62   | 6    | 13   | EDI   |
| 14    | 2911   | 16     | 39     | 13   | 21   | 9   | 65   | 6    | 11   | EDI   |
| 15    | 2797   | 15     | 20     | 10   | 9    | 7   | 7    | 8    | 7    | EDI   |
| 16    | 2625   | 14     | 17     | 8    | 8    | 8   | 7    | 7    | 6.5  | EDI   |
| 17    | 849    | 11     | 8.5    | 10   | 16   | 6   | 7    | 5    | 7    | EDI   |
| 18    | 934    | 11     | 8      | 11   | 18   | 6   | 5    | 5    | 7    | EDI   |
| 19    | 1106   | 11     | 11     | 11   | 6    | 6   | 10   | 3    | 6    | EDI   |
| 20    | 1146.5 | 12     | 9      | 9    | 6    | 5   | 10   | 3    | 7    | EDI   |
| 21    | 13     | 1288.5 | 11     | 10   | 15   | 10  | 6    | 11   | 16   | GD7   |
| 22    | 12     | 1467   | 10     | 12   | 17   | 12  | 8    | 12   | 17.5 | GD7   |
| 23    | 12     | 1348   | 13     | 17.5 | 15.5 | 6   | 7    | 18   | 9    | GD7   |
| 24    | 13     | 1443   | 11     | 18   | 16   | 6   | 7    | 19.5 | 9    | GD7   |
| 25    | 11     | 1259   | 13     | 19   | 11   | 8   | 8    | 17   | 10   | GD7   |
| 26    | 11     | 1274.5 | 12     | 18   | 13   | 7   | 7.5  | 18.5 | 8    | GD7   |
| 27    | 9      | 1101.5 | 7      | 12.5 | 9    | 5.5 | 5    | 18   | 7    | GD7   |
| 28    | 10     | 1152   | 9      | 14   | 10   | 4   | 7    | 20   | 7    | GD7   |
| 29    | 13     | 253.5  | 11     | 15   | 17.5 | 10  | 7    | 10   | 11   | GD7   |
| 30    | 12     | 310    | 13     | 17.5 | 17   | 10  | 8    | 13   | 13   | GD7   |
| 31    | 7      | 1821.5 | 8      | 7    | 52   | 4   | 3    | 4    | 6    | GD7   |
| 32    | 9      | 1931   | 8      | 7    | 57   | 5   | 3    | 4    | 7    | GD7   |
| 33    | 17     | 514    | 9      | 13.5 | 26   | 8   | 6    | 8.5  | 13   | GD7   |
| 34    | 17     | 490    | 10     | 15   | 27.5 | 9   | 6    | 8    | 12   | GD7   |
| 35    | 10     | 427.5  | 8      | 17   | 12   | 6   | 6    | 9    | 7    | GD7   |
| 36    | 9      | 294.5  | 8      | 15   | 11   | 4   | 4    | 7    | 7    | GD7   |
| 37    | 10     | 1177   | 9.5    | 10   | 5    | 6   | 4    | 4    | 10   | GD7   |
| 38    | 9      | 961    | 7      | 8    | 4    | 4   | 2    | 3    | 6    | GD7   |
| 39    | 7      | 816    | 7      | 7    | 6    | 4   | 4    | 3    | 6    | GD7   |
| 40    | 7      | 895    | 6      | 7    | 5    | 4   | 5    | 3    | 6    | GD7   |
| 41    | 7      | 11     | 1739   | 6    | 6    | 5   | 5    | 6    | 4    | MHV   |
| 42    | 10     | 11     | 1813.5 | 6    | 5    | 6   | 5    | 8    | 7    | MHV   |
| 43    | 9      | 10     | 1130   | 7    | 8    | 5   | 5    | 3    | 6    | MHV   |
| 44    | 10     | 10     | 1013.5 | 5    | 7    | 6   | 5    | 3    | 5    | MHV   |
| 45    | 9      | 12     | 6176   | 13   | 12   | 10  | 7.5  | 15   | 11.5 | MHV   |

|    |     |       |        |       |       |     |      |      |          |
|----|-----|-------|--------|-------|-------|-----|------|------|----------|
| 46 | 11  | 13    | 6352   | 12    | 11    | 8.5 | 9    | 12   | 9 MHV    |
| 47 | 10  | 10    | 150    | 10    | 11    | 5   | 5    | 11   | 5 NEG    |
| 48 | 10  | 11    | 159.5  | 11    | 12    | 4.5 | 5    | 11   | 6 NEG    |
| 49 | 9   | 11    | 665    | 7     | 6     | 6   | 20   | 6    | 6 MHV    |
| 50 | 7   | 10    | 642    | 8     | 6     | 4.5 | 18   | 6    | 5 MHV    |
| 51 | 10  | 10    | 568.5  | 6     | 7     | 6   | 4    | 5    | 5.5 MHV  |
| 52 | 13  | 11    | 620    | 8     | 7     | 8   | 4.5  | 6    | 5.5 MHV  |
| 53 | 9   | 11    | 983.5  | 12    | 8     | 6   | 6    | 45   | 6 MHV    |
| 54 | 11  | 11    | 1104   | 11    | 10    | 7   | 8    | 47   | 8.5 MHV  |
| 55 | 11  | 10    | 403    | 13    | 509.5 | 6.5 | 7    | 17   | 7 MYC    |
| 56 | 12  | 11    | 444    | 16    | 500   | 6.5 | 8    | 19   | 7 MYC    |
| 57 | 10  | 10.5  | 1008   | 11    | 11    | 6   | 6    | 9    | 7 MHV    |
| 58 | 8   | 11    | 982    | 10.5  | 9     | 7   | 7    | 8    | 6 MHV    |
| 59 | 11  | 12    | 2627   | 13    | 11    | 6   | 14   | 19   | 9 MHV    |
| 60 | 9.5 | 14    | 2610   | 13    | 11    | 7   | 14   | 22   | 8 MHV    |
| 61 | 17  | 20    | 3385   | 30    | 31    | 17  | 13   | 25   | 17.5 MHV |
| 62 | 15  | 19    | 3038   | 26    | 22    | 15  | 14   | 22   | 18 MHV   |
| 63 | 7   | 9     | 745    | 6     | 5     | 6   | 4    | 4    | 5 MHV    |
| 64 | 6.5 | 10    | 795.5  | 6     | 4     | 5   | 5    | 5    | 6 MHV    |
| 65 | 15  | 13    | 1118   | 9     | 18    | 6   | 6    | 5    | 7 MHV    |
| 66 | 18  | 13    | 1154   | 8     | 22    | 7   | 5    | 5    | 7 MHV    |
| 67 | 9   | 10    | 194.5  | 8.5   | 6     | 5   | 4    | 5    | 8 MHV    |
| 68 | 9   | 8     | 161    | 11    | 7     | 6   | 5    | 5    | 8 NEG    |
| 69 | 8   | 8     | 1516.5 | 7     | 6     | 4.5 | 5    | 6    | 7 MHV    |
| 70 | 8   | 10    | 1226   | 6     | 5.5   | 5   | 5    | 5    | 7 MHV    |
| 71 | 7   | 8     | 1378   | 6     | 5     | 5   | 3    | 3    | 5 MHV    |
| 72 | 8   | 9     | 1371   | 6     | 4     | 5   | 4    | 3    | 4 MHV    |
| 73 | 8   | 8     | 494    | 5     | 4     | 3   | 4    | 4    | 4 MHV    |
| 74 | 8   | 9     | 546    | 6     | 5     | 5   | 5    | 5    | 5 MHV    |
| 75 | 6   | 6     | 342    | 4     | 4     | 4   | 3    | 2    | 3 MHV    |
| 76 | 7   | 7     | 367    | 4     | 5     | 5   | 5.5  | 4    | 6 MHV    |
| 77 | 7   | 9     | 834    | 6     | 10    | 5   | 5    | 3    | 5 MHV    |
| 78 | 7   | 9     | 893    | 6     | 11    | 4   | 4    | 4    | 6 MHV    |
| 79 | 8   | 10    | 2146   | 16    | 7     | 4   | 4    | 4    | 7 MHV    |
| 80 | 7   | 8     | 1599   | 13    | 5     | 4   | 3    | 3    | 5 MHV    |
| 81 | 7   | 20    | 13     | 359   | 7     | 4   | 11   | 18   | 5 MVM    |
| 82 | 7   | 22    | 14     | 393.5 | 6     | 5   | 14   | 23   | 5 MVM    |
| 83 | 35  | 283   | 13     | 367.5 | 139   | 6   | 77   | 4    | 4 MVM    |
| 84 | 33  | 266.5 | 11     | 326   | 118   | 5   | 73   | 4    | 4 MVM    |
| 85 | 13  | 170   | 11     | 276   | 8     | 6   | 48   | 20.5 | 5 MVM    |
| 86 | 16  | 237   | 15     | 372.5 | 11    | 9   | 63   | 31   | 7 MVM    |
| 87 | 16  | 57    | 11     | 262   | 14    | 6   | 9    | 24   | 6 MVM    |
| 88 | 16  | 65    | 14     | 296.5 | 16    | 9   | 11   | 24.5 | 6 MVM    |
| 89 | 7   | 10    | 10     | 110   | 13    | 4   | 5    | 45   | 5 MVM    |
| 90 | 8   | 10    | 9      | 112   | 11    | 3   | 4    | 40   | 4 MVM    |
| 91 | 8   | 10    | 9      | 149   | 5.5   | 4   | 19.5 | 9    | 4 MVM    |
| 92 | 10  | 9     | 9      | 177   | 5     | 5   | 23   | 11   | 5 MVM    |

|     |      |        |       |       |        |     |       |      |          |
|-----|------|--------|-------|-------|--------|-----|-------|------|----------|
| 93  | 11   | 16     | 7     | 200   | 6      | 4   | 8     | 6    | 5 MVM    |
| 94  | 10   | 14     | 7     | 219   | 4      | 3   | 7     | 7    | 5 MVM    |
| 95  | 10   | 43     | 8     | 341   | 9      | 5   | 8     | 6    | 4 MVM    |
| 96  | 8    | 33.5   | 7     | 267.5 | 8      | 5.5 | 7.5   | 4    | 3 MVM    |
| 97  | 39   | 15     | 6     | 433   | 8      | 5   | 7     | 17   | 16 MVM   |
| 98  | 32   | 13     | 5     | 410.5 | 6      | 6   | 6     | 12   | 15 MVM   |
| 99  | 8    | 44     | 7     | 151   | 4      | 4   | 9     | 77   | 5 MVM    |
| 100 | 7    | 41     | 7.5   | 136   | 4      | 4   | 7     | 65   | 5 MVM    |
| 101 | 11   | 132    | 10    | 28    | 27     | 6   | 30    | 17   | 7 GD7    |
| 102 | 11   | 144    | 11    | 28    | 28     | 6   | 32    | 18   | 7 GD7    |
| 103 | 12   | 75.5   | 9     | 333   | 12     | 7   | 15    | 19   | 7 MVM    |
| 104 | 10.5 | 72     | 7     | 305   | 9      | 5   | 21.5  | 21   | 6 MVM    |
| 105 | 10   | 17     | 12    | 85.5  | 11     | 6   | 6     | 26   | 7 NEG    |
| 106 | 11   | 18     | 13    | 106.5 | 15     | 6   | 7     | 31   | 7 MVM    |
| 107 | 18   | 22     | 10    | 89    | 8      | 4   | 7     | 4    | 8 NEG    |
| 108 | 19   | 24     | 9     | 99    | 9      | 6   | 7     | 3    | 7 MVM    |
| 109 | 13   | 206    | 21.5  | 191   | 13     | 7   | 63    | 35   | 8 GD7    |
| 110 | 12   | 233    | 21    | 190.5 | 12     | 8   | 66.5  | 39.5 | 8.5 GD7  |
| 111 | 11   | 80     | 11    | 303.5 | 15.5   | 5   | 13    | 18   | 4 MVM    |
| 112 | 12   | 106    | 9     | 438   | 66.5   | 8.5 | 14    | 17.5 | 7 MVM    |
| 113 | 13   | 123    | 12    | 31    | 17     | 8   | 29.5  | 18   | 8 GD7    |
| 114 | 12   | 119    | 13    | 33    | 17     | 8   | 31.5  | 17   | 10 GD7   |
| 115 | 7    | 12     | 7     | 415   | 7      | 5   | 4     | 3    | 5 MVM    |
| 116 | 9    | 13     | 7     | 412.5 | 7      | 5   | 5     | 3    | 5 MVM    |
| 117 | 7    | 17     | 8     | 228   | 3.5    | 5   | 5.5   | 23   | 3 MVM    |
| 118 | 5    | 14     | 5     | 189   | 3      | 7   | 2     | 21.5 | 2 MVM    |
| 119 | 9    | 23     | 7     | 444   | 30.5   | 3.5 | 7     | 7    | 11 MVM   |
| 120 | 9    | 15     | 5     | 459   | 46     | 7   | 10    | 9    | 14 MVM   |
| 121 | 11   | 716    | 137   | 69.5  | 6057   | 7   | 300   | 163  | 20 MYC   |
| 122 | 12   | 748    | 133   | 73    | 5906.5 | 8   | 306   | 159  | 19 MYC   |
| 123 | 12   | 1195   | 126   | 98.5  | 4219   | 8   | 512   | 24   | 12 MYC   |
| 124 | 16   | 1688   | 145   | 126   | 6088   | 14  | 679   | 30   | 20 MYC   |
| 125 | 17   | 342    | 25    | 27    | 4809   | 10  | 93.5  | 6    | 15 MYC   |
| 126 | 18   | 373.5  | 28.5  | 34    | 5364   | 7   | 109   | 6    | 15 MYC   |
| 127 | 11   | 1958   | 284   | 178   | 5075.5 | 11  | 833   | 8    | 20 MYC   |
| 128 | 13   | 2441.5 | 330   | 202.5 | 5678   | 12  | 976   | 9    | 23.5 MYC |
| 129 | 34.5 | 852    | 119   | 82    | 4781   | 20  | 239.5 | 37   | 22.5 MYC |
| 130 | 35   | 834    | 115   | 80    | 4860.5 | 22  | 240   | 35   | 23 MYC   |
| 131 | 13   | 1466   | 154   | 100.5 | 7148.5 | 9.5 | 472   | 9    | 22 MYC   |
| 132 | 15   | 1865   | 191.5 | 137   | 8170   | 14  | 627   | 12   | 28 MYC   |
| 133 | 19   | 821    | 70    | 62    | 4921   | 11  | 267.5 | 13   | 17 MYC   |
| 134 | 19   | 830    | 69    | 67    | 4716.5 | 10  | 290   | 13   | 16 MYC   |
| 135 | 14   | 334.5  | 134   | 56    | 6475   | 10  | 110.5 | 8    | 20 MYC   |
| 136 | 15   | 313    | 131   | 54    | 6379.5 | 10  | 105   | 8    | 22 MYC   |
| 137 | 13   | 2644   | 79    | 161   | 10234  | 17  | 955   | 37   | 16 MYC   |
| 138 | 14   | 2791   | 93    | 185   | 9612   | 16  | 1002  | 39.5 | 17.5 MYC |
| 139 | 24   | 2550   | 256.5 | 187   | 11764  | 18  | 837.5 | 29   | 37 MYC   |

|     |      |        |       |       |        |      |       |      |          |
|-----|------|--------|-------|-------|--------|------|-------|------|----------|
| 140 | 26   | 2458.5 | 245   | 193.5 | 11497  | 17   | 838   | 28   | 38 MYC   |
| 141 | 26   | 2134   | 71    | 162.5 | 9517   | 12   | 705   | 17   | 15 MYC   |
| 142 | 26   | 2061   | 71.5  | 151   | 9784   | 11   | 667.5 | 16   | 14 MYC   |
| 143 | 14   | 27.5   | 9     | 7.5   | 4645   | 12   | 9     | 9    | 7.5 MYC  |
| 144 | 15   | 26     | 10    | 9     | 4808   | 10   | 10    | 12   | 8 MYC    |
| 145 | 32   | 296    | 17    | 22    | 7793   | 9    | 97    | 17   | 8 MYC    |
| 146 | 35   | 359    | 16    | 23    | 7712.5 | 11   | 107.5 | 21.5 | 9 MYC    |
| 147 | 30   | 2568   | 127   | 189.5 | 3448   | 26   | 849   | 57   | 29 MYC   |
| 148 | 33   | 2526   | 134   | 190.5 | 3720   | 27   | 855.5 | 62   | 24 MYC   |
| 149 | 20   | 127    | 117   | 69    | 4768   | 19   | 102   | 16   | 26.5 MYC |
| 150 | 24   | 135    | 118   | 83    | 5800   | 25   | 116   | 17   | 36 MYC   |
| 151 | 17   | 655.5  | 47    | 72    | 2498   | 9    | 195   | 26   | 16 MYC   |
| 152 | 17   | 659    | 43    | 70    | 2518   | 9    | 197   | 28   | 17 MYC   |
| 153 | 26   | 393    | 44    | 86.5  | 5709   | 13   | 90.5  | 35   | 19 MYC   |
| 154 | 30   | 427    | 51    | 95    | 5952   | 14   | 96    | 35   | 21 MYC   |
| 155 | 21   | 2292   | 192.5 | 183   | 7342   | 16   | 829   | 44   | 37 MYC   |
| 156 | 21   | 2361   | 204.5 | 199   | 7669   | 19   | 907   | 47   | 39 MYC   |
| 157 | 23   | 14     | 9     | 13    | 2087   | 7    | 6     | 17   | 19 MYC   |
| 158 | 20   | 15     | 8     | 13    | 1974   | 8    | 5     | 16   | 16 MYC   |
| 159 | 19   | 16     | 59    | 13.5  | 7620   | 8.5  | 13    | 6.5  | 14 MYC   |
| 160 | 16   | 15     | 50.5  | 11    | 6775   | 8    | 13    | 6    | 14 MYC   |
| 161 | 25   | 26.5   | 13    | 24    | 16     | 16   | 12    | 35   | 18 NEG   |
| 162 | 26   | 29     | 12    | 26    | 18     | 21   | 11    | 29   | 20 NEG   |
| 163 | 14   | 22.5   | 12    | 13    | 8      | 10   | 10    | 12   | 8 NEG    |
| 164 | 17   | 24     | 13    | 16    | 9      | 13   | 10    | 17   | 10 NEG   |
| 165 | 22.5 | 28.5   | 25    | 72.5  | 79     | 16   | 77    | 63.5 | 15 NEG   |
| 166 | 17   | 23     | 21    | 43.5  | 49     | 11.5 | 47    | 45   | 13 NEG   |
| 167 | 11   | 17.5   | 9     | 22    | 10.5   | 7    | 145   | 7    | 10 REO   |
| 168 | 13   | 18     | 10    | 26    | 13     | 9    | 177   | 10   | 11 REO   |
| 169 | 18   | 26     | 22    | 40    | 19     | 13   | 16    | 45   | 16 NEG   |
| 170 | 20   | 27     | 20    | 43    | 23     | 13   | 14.5  | 55   | 17 NEG   |
| 171 | 30   | 20     | 11    | 11    | 9      | 14   | 6.5   | 15   | 11 NEG   |
| 172 | 38   | 21     | 12    | 13    | 9      | 16.5 | 10    | 22   | 13 NEG   |
| 173 | 15   | 24     | 16    | 16    | 47     | 12   | 98    | 39   | 14 NEG   |
| 174 | 15   | 24     | 16    | 17    | 49.5   | 13   | 84    | 39   | 13 NEG   |
| 175 | 14   | 20     | 11    | 13    | 36.5   | 13   | 46    | 11.5 | 14 NEG   |
| 176 | 15   | 22     | 11    | 12    | 40     | 16   | 48    | 12   | 15 NEG   |
| 177 | 22   | 25     | 87    | 80    | 71.5   | 15   | 29    | 129  | 34 NEG   |
| 178 | 17   | 21     | 53    | 52    | 33     | 10   | 15    | 67   | 18.5 NEG |
| 179 | 25   | 29     | 30    | 54.5  | 170    | 17   | 20    | 97   | 21 NEG   |
| 180 | 21   | 26     | 22    | 38    | 126.5  | 14   | 14.5  | 68   | 15 NEG   |
| 181 | 16   | 19     | 24    | 18    | 14     | 11   | 6     | 39   | 10.5 NEG |
| 182 | 14   | 17     | 22    | 13.5  | 12     | 10   | 6     | 32   | 10 NEG   |
| 183 | 24   | 26     | 29    | 19    | 21.5   | 20   | 19    | 16   | 21 NEG   |
| 184 | 21   | 22     | 21    | 13    | 18     | 14   | 12    | 11   | 17 NEG   |
| 185 | 13   | 19     | 22    | 10.5  | 6      | 7    | 6     | 13   | 10 NEG   |
| 186 | 10   | 17     | 17    | 8.5   | 6      | 6    | 5     | 11   | 8.5 NEG  |

|     |      |      |      |      |       |      |     |      |          |
|-----|------|------|------|------|-------|------|-----|------|----------|
| 187 | 14   | 18   | 11   | 13   | 34    | 10   | 13  | 93   | 10 NEG   |
| 188 | 13.5 | 18   | 11   | 13   | 38    | 8    | 12  | 90.5 | 9 NEG    |
| 189 | 16   | 21   | 10   | 9    | 25    | 16   | 6   | 10   | 14 NEG   |
| 190 | 16   | 22   | 9    | 8    | 32    | 17   | 8   | 10   | 15 NEG   |
| 191 | 15   | 18   | 15.5 | 9    | 9     | 10   | 9   | 14   | 10 NEG   |
| 192 | 13   | 18   | 14   | 11   | 9     | 10   | 8   | 12   | 10 NEG   |
| 193 | 14   | 19   | 15   | 10   | 8     | 9    | 6   | 64   | 9 NEG    |
| 194 | 13   | 21   | 17   | 10   | 9     | 9    | 7   | 69   | 9 NEG    |
| 195 | 12   | 22   | 17   | 8    | 18    | 7    | 29  | 8.5  | 8 NEG    |
| 196 | 11   | 21   | 16   | 8    | 15    | 6    | 25  | 7    | 7 NEG    |
| 197 | 13   | 17   | 10   | 14   | 14    | 7    | 5   | 24.5 | 8 NEG    |
| 198 | 10   | 16   | 10   | 12   | 13    | 6    | 5   | 23   | 7 NEG    |
| 199 | 12   | 19   | 9    | 10   | 6     | 8    | 6   | 61   | 7 NEG    |
| 200 | 11   | 19   | 9    | 9    | 6     | 7    | 5   | 49   | 7 NEG    |
| 201 | 14   | 21   | 9    | 12   | 8     | 8    | 5   | 74   | 14 NEG   |
| 202 | 12   | 18   | 8    | 8    | 6     | 6    | 5   | 55.5 | 11 NEG   |
| 203 | 13   | 24   | 15   | 36   | 10    | 11   | 8   | 7    | 36 NEG   |
| 204 | 10.5 | 19   | 12   | 26   | 7     | 8    | 7   | 5    | 19 NEG   |
| 205 | 9    | 18   | 24   | 9    | 7     | 5.5  | 9   | 5    | 8 NEG    |
| 206 | 10   | 17   | 21   | 8    | 6.5   | 6    | 8   | 5    | 7 NEG    |
| 207 | 9    | 14   | 10   | 9    | 5     | 5    | 5   | 5    | 8 NEG    |
| 208 | 10   | 16   | 10   | 10   | 6     | 6    | 6   | 5    | 8 NEG    |
| 209 | 19   | 22   | 14.5 | 26   | 15.5  | 14.5 | 10  | 11   | 33 NEG   |
| 210 | 16   | 20   | 12   | 24   | 10    | 11   | 7   | 9    | 27 NEG   |
| 211 | 14   | 20   | 14   | 20   | 8     | 11.5 | 65  | 7    | 16 NEG   |
| 212 | 12   | 18   | 13   | 16   | 8     | 8.5  | 49  | 7    | 14 NEG   |
| 213 | 8    | 16   | 7    | 6    | 6     | 5    | 4   | 7    | 6 NEG    |
| 214 | 8    | 15   | 8    | 6    | 5     | 6    | 4   | 5    | 6 NEG    |
| 215 | 11   | 15   | 8    | 12.5 | 6     | 6    | 4   | 66   | 7 NEG    |
| 216 | 11   | 19   | 8    | 14   | 7     | 5    | 5   | 78   | 7 NEG    |
| 217 | 11   | 15   | 9    | 8.5  | 6     | 6    | 5   | 34.5 | 7 NEG    |
| 218 | 12   | 17   | 9    | 11.5 | 7     | 7    | 6   | 50   | 8 NEG    |
| 219 | 14   | 22   | 17   | 25.5 | 14    | 9    | 9   | 77.5 | 13 NEG   |
| 220 | 13   | 20   | 15   | 20   | 11    | 9    | 10  | 60.5 | 12 NEG   |
| 221 | 12   | 16   | 16   | 45.5 | 14    | 7    | 8   | 27   | 10 NEG   |
| 222 | 16   | 19   | 19   | 69   | 21    | 9    | 10  | 48   | 15 NEG   |
| 223 | 22.5 | 18   | 16   | 12   | 9     | 10   | 6   | 166  | 11 NEG   |
| 224 | 25   | 18   | 18   | 10   | 9     | 10   | 6   | 157  | 10 NEG   |
| 225 | 16   | 25   | 11   | 15   | 9     | 11   | 5.5 | 77   | 29 NEG   |
| 226 | 16   | 23   | 11   | 18   | 10    | 11   | 6   | 85   | 30.5 NEG |
| 227 | 14   | 17   | 12   | 12   | 216   | 9    | 5   | 32   | 15 NEG   |
| 228 | 17   | 18.5 | 12.5 | 14   | 281.5 | 10   | 7   | 37   | 17.5 MYC |
| 229 | 19   | 27   | 11   | 16   | 12    | 11.5 | 11  | 21   | 30.5 NEG |
| 230 | 23   | 30   | 12   | 18   | 14    | 16.5 | 13  | 27   | 34 NEG   |
| 231 | 14   | 20   | 9    | 11   | 9     | 8    | 5   | 20   | 13 NEG   |
| 232 | 15   | 20   | 11   | 15   | 10    | 9    | 6   | 24   | 14 NEG   |
| 233 | 17   | 25   | 33   | 24   | 13.5  | 11   | 8   | 48   | 30 NEG   |

|     |      |      |      |      |      |        |      |      |        |
|-----|------|------|------|------|------|--------|------|------|--------|
| 234 | 17   | 23   | 31   | 20   | 12   | 9      | 8    | 45   | 26 NEG |
| 235 | 26   | 30   | 13   | 32.5 | 10   | 13     | 8    | 49   | 44 NEG |
| 236 | 24   | 27   | 11   | 26   | 9    | 12     | 6.5  | 39   | 35 NEG |
| 237 | 19   | 37   | 13   | 68   | 40   | 10.5   | 11   | 9.5  | 19 NEG |
| 238 | 18   | 36   | 13.5 | 77   | 41   | 10     | 11   | 10   | 17 NEG |
| 239 | 13   | 21   | 13   | 12   | 6    | 7      | 6    | 7    | 19 NEG |
| 240 | 15   | 23   | 16   | 12   | 9    | 10     | 6.5  | 9    | 30 NEG |
| 241 | 12   | 18   | 13   | 15   | 10   | 8      | 17   | 15.5 | 10 NEG |
| 242 | 12   | 14   | 14   | 15   | 11.5 | 11     | 25.5 | 16   | 13 NEG |
| 243 | 7    | 11   | 7    | 5    | 4    | 4      | 4    | 6    | 4 NEG  |
| 244 | 8    | 11   | 9    | 5    | 3    | 4      | 4    | 6.5  | 6 NEG  |
| 245 | 9    | 11   | 8    | 11   | 20   | 4      | 4    | 14   | 9 NEG  |
| 246 | 8    | 12   | 9    | 12   | 19.5 | 5      | 4    | 13   | 12 NEG |
| 247 | 11   | 13   | 10   | 11   | 7    | 6      | 4    | 10   | 11 NEG |
| 248 | 11.5 | 12   | 10   | 11   | 7    | 4      | 4    | 11   | 9 NEG  |
| 249 | 12   | 15.5 | 11   | 17   | 13   | 9      | 17   | 37   | 10 NEG |
| 250 | 11   | 15   | 11   | 16   | 13   | 9      | 16   | 29   | 9 NEG  |
| 251 | 11   | 15   | 11   | 17   | 34   | 6      | 24   | 20   | 9 NEG  |
| 252 | 11   | 13   | 9    | 14   | 26   | 5      | 21   | 18   | 9 NEG  |
| 253 | 9.5  | 11   | 10   | 8    | 6    | 5      | 5    | 12   | 6 NEG  |
| 254 | 10   | 12   | 9    | 8    | 5    | 5      | 4.5  | 14   | 8 NEG  |
| 255 | 10   | 11.5 | 9    | 9    | 8    | 5      | 5    | 8.5  | 6 NEG  |
| 256 | 11   | 13   | 8.5  | 10.5 | 9.5  | 5      | 5    | 10   | 7 NEG  |
| 257 | 12   | 13   | 13   | 21   | 13   | 8      | 36   | 43   | 11 NEG |
| 258 | 10   | 14   | 12   | 24   | 14   | 9      | 41   | 52   | 12 NEG |
| 259 | 8    | 10   | 9    | 7    | 12   | 795    | 3    | 8    | 5 PVM  |
| 260 | 8    | 11   | 8    | 7    | 12   | 770    | 4    | 8    | 6 PVM  |
| 261 | 12   | 13   | 12   | 22   | 13   | 659.5  | 6    | 18   | 8 PVM  |
| 262 | 13   | 13   | 13   | 20.5 | 16   | 594    | 7    | 19.5 | 8 PVM  |
| 263 | 8    | 11   | 10.5 | 7    | 7    | 911.5  | 4    | 3    | 8 PVM  |
| 264 | 10   | 13   | 13   | 8    | 6    | 1087   | 5    | 4    | 10 PVM |
| 265 | 9    | 10.5 | 10   | 9    | 6    | 887.5  | 5    | 9    | 9 PVM  |
| 266 | 8    | 13   | 10   | 8    | 6    | 933    | 5    | 9.5  | 9 PVM  |
| 267 | 10   | 11   | 11   | 13.5 | 10   | 636.5  | 4    | 35.5 | 7 PVM  |
| 268 | 10.5 | 11   | 10   | 15   | 11   | 646.5  | 5    | 30   | 7 PVM  |
| 269 | 7    | 9    | 8    | 6    | 511  | 867    | 8    | 3    | 6 PVM  |
| 270 | 8    | 11   | 8    | 7    | 544  | 935    | 10   | 2    | 6 PVM  |
| 271 | 8    | 11   | 7    | 8    | 5    | 450    | 4    | 3    | 7 PVM  |
| 272 | 8    | 12   | 8    | 8    | 5.5  | 388    | 4    | 4    | 7 PVM  |
| 273 | 12   | 11   | 9    | 16   | 12   | 543    | 5    | 10   | 7 PVM  |
| 274 | 13   | 12   | 9    | 15   | 14   | 495    | 5    | 8    | 6 PVM  |
| 275 | 8    | 9    | 6.5  | 6.5  | 5    | 804    | 5    | 4    | 5 PVM  |
| 276 | 7    | 10   | 6    | 6    | 7    | 1033   | 5    | 3    | 5 PVM  |
| 277 | 8    | 11   | 7    | 8    | 14.5 | 1169   | 6    | 5    | 6 PVM  |
| 278 | 9    | 11   | 9    | 8    | 24   | 1281.5 | 6    | 6    | 7 PVM  |
| 279 | 8    | 10   | 7    | 8    | 6    | 1000   | 3    | 5    | 10 PVM |
| 280 | 7    | 10   | 7    | 7    | 6    | 859.5  | 3    | 5    | 7 PVM  |

|     |    |      |      |      |      |     |        |        |         |
|-----|----|------|------|------|------|-----|--------|--------|---------|
| 281 | 9  | 12   | 11   | 12   | 8    | 6.5 | 1797   | 9      | 7 REO   |
| 282 | 10 | 13   | 12.5 | 14   | 10   | 7   | 1918   | 10     | 9 REO   |
| 283 | 10 | 10   | 14   | 12   | 10   | 6   | 1411   | 20     | 7 REO   |
| 284 | 13 | 12   | 14   | 11.5 | 10   | 6   | 1521.5 | 22     | 9 REO   |
| 285 | 9  | 11   | 8    | 7    | 7    | 7   | 1134   | 18     | 7 REO   |
| 286 | 10 | 11   | 7    | 8    | 6    | 5   | 1124   | 16     | 6 REO   |
| 287 | 11 | 12   | 9    | 12   | 9    | 7   | 1848.5 | 10     | 8 REO   |
| 288 | 11 | 12   | 8    | 12   | 8    | 6   | 1665   | 9      | 7 REO   |
| 289 | 9  | 11   | 7    | 10   | 8    | 4   | 1899   | 11     | 5 REO   |
| 290 | 8  | 10   | 8    | 11   | 7    | 4   | 1904   | 11     | 6 REO   |
| 291 | 8  | 9    | 7    | 7    | 5    | 4   | 999    | 2      | 5 REO   |
| 292 | 7  | 8    | 6    | 4.5  | 5    | 4   | 1043   | 2.5    | 5 REO   |
| 293 | 9  | 10   | 7    | 5    | 4    | 4   | 1200.5 | 3      | 5 REO   |
| 294 | 11 | 9    | 7    | 5    | 4    | 3.5 | 1137   | 3      | 4.5 REO |
| 295 | 9  | 9    | 6    | 7    | 19   | 5   | 1151.5 | 4      | 5 REO   |
| 296 | 9  | 10   | 7    | 7    | 20   | 5   | 1103   | 3      | 6 REO   |
| 297 | 8  | 15   | 55   | 10   | 60   | 5   | 1368.5 | 8      | 6 REO   |
| 298 | 8  | 14   | 59   | 10   | 31   | 7   | 1519.5 | 10     | 6 REO   |
| 299 | 7  | 9    | 77.5 | 7    | 10   | 4.5 | 1119   | 11     | 5.5 REO |
| 300 | 8  | 9    | 81   | 8    | 10.5 | 4   | 1181   | 12     | 5 REO   |
| 301 | 8  | 10   | 7    | 10   | 7    | 3   | 1383   | 6      | 5 REO   |
| 302 | 8  | 11   | 7    | 10   | 7.5  | 4   | 1499   | 8      | 6 REO   |
| 303 | 10 | 75   | 9    | 10   | 17   | 5   | 1412   | 11     | 9 REO   |
| 304 | 8  | 56   | 6.5  | 8    | 14   | 4   | 1211   | 9      | 5 REO   |
| 305 | 8  | 10   | 9    | 10.5 | 8    | 5   | 647    | 6      | 6 REO   |
| 306 | 9  | 11   | 9.5  | 11   | 12   | 6   | 747.5  | 7      | 7 REO   |
| 307 | 8  | 10   | 12   | 7    | 5    | 4   | 691    | 4      | 5 REO   |
| 308 | 8  | 9    | 13   | 7    | 4    | 4   | 635.5  | 3      | 6 REO   |
| 309 | 8  | 9    | 8    | 5    | 3.5  | 3   | 270    | 2.5    | 5 REO   |
| 310 | 7  | 11   | 10   | 5    | 4    | 3   | 271    | 3      | 5 REO   |
| 311 | 7  | 10   | 6    | 5    | 7    | 4   | 633    | 3      | 5 REO   |
| 312 | 7  | 7.5  | 7    | 5    | 8    | 3   | 686    | 4      | 4 REO   |
| 313 | 12 | 12.5 | 8    | 8    | 5    | 9   | 729    | 6      | 6 REO   |
| 314 | 9  | 11   | 7    | 6    | 5.5  | 7   | 753    | 5      | 6 REO   |
| 315 | 7  | 10   | 6    | 6    | 7    | 3   | 832    | 2      | 4.5 REO |
| 316 | 8  | 11   | 7    | 7    | 8    | 5   | 959    | 3      | 5 REO   |
| 317 | 6  | 6    | 5    | 3    | 3    | 2   | 526    | 2      | 2 REO   |
| 318 | 7  | 9    | 6    | 5    | 6    | 4   | 1373   | 3      | 5 REO   |
| 319 | 12 | 12   | 9    | 4    | 7    | 4   | 728    | 3      | 5 REO   |
| 320 | 13 | 13.5 | 10   | 7    | 26   | 5   | 758    | 3      | 5 REO   |
| 321 | 11 | 14   | 10   | 13   | 10   | 6   | 6      | 3285   | 8 SEN   |
| 322 | 10 | 11   | 8    | 13   | 11   | 5   | 4      | 2838   | 7 SEN   |
| 323 | 10 | 13   | 14   | 8    | 6    | 8   | 6      | 6994.5 | 8 SEN   |
| 324 | 11 | 11   | 14   | 9    | 7    | 7   | 5      | 6262   | 8 SEN   |
| 325 | 9  | 11   | 8    | 8    | 9    | 6   | 4      | 1363   | 7 SEN   |
| 326 | 8  | 9    | 7    | 6    | 7    | 4   | 4      | 1249   | 6 SEN   |
| 327 | 26 | 14   | 10   | 11   | 7    | 5   | 6      | 4595   | 8 SEN   |



|     |       |      |      |      |     |     |      |        |            |
|-----|-------|------|------|------|-----|-----|------|--------|------------|
| 328 | 27    | 13   | 11   | 11   | 7   | 5   | 6    | 4350   | 7 SEN      |
| 329 | 9     | 10   | 9    | 10   | 7   | 8   | 5    | 7394.5 | 10.5 SEN   |
| 330 | 10    | 13   | 9    | 10   | 7.5 | 13  | 6    | 8240   | 11 SEN     |
| 331 | 17    | 13   | 7    | 11   | 7   | 5   | 3.5  | 5173   | 6 SEN      |
| 332 | 12    | 11   | 8    | 10   | 6   | 5   | 4    | 4907   | 6 SEN      |
| 333 | 9     | 11   | 8    | 9    | 7   | 5   | 4    | 982    | 7 SEN      |
| 334 | 8     | 11   | 8    | 12   | 9   | 5   | 5    | 1061   | 6 SEN      |
| 335 | 8     | 10   | 8    | 7    | 8.5 | 6   | 12   | 3215.5 | 6.5 SEN    |
| 336 | 8     | 10   | 8    | 7.5  | 8   | 5   | 11   | 3646   | 6 SEN      |
| 337 | 10    | 14   | 11   | 17   | 12  | 6   | 6    | 6739   | 8 SEN      |
| 338 | 9     | 14   | 12   | 20.5 | 12  | 7   | 6    | 6398   | 8 SEN      |
| 339 | 8     | 10   | 11   | 7    | 6   | 5   | 4    | 4166   | 6 SEN      |
| 340 | 8     | 10   | 11   | 7    | 5   | 4   | 4    | 4364   | 6 SEN      |
| 341 | 10    | 10   | 9    | 20   | 6   | 7   | 7    | 5      | 2509 VAC   |
| 342 | 9     | 11   | 7    | 21   | 6   | 5   | 8    | 4      | 2517 VAC   |
| 343 | 9     | 13   | 12   | 9    | 4.5 | 5   | 7    | 3      | 3064.5 VAC |
| 344 | 10    | 16   | 12   | 11   | 6   | 4   | 6.5  | 4      | 3224 VAC   |
| 345 | 10    | 13   | 10   | 16   | 7   | 6   | 5    | 3      | 2662 VAC   |
| 346 | 10    | 13   | 9    | 17   | 7   | 5   | 5    | 3      | 2362 VAC   |
| 347 | 11    | 15   | 12.5 | 29   | 30  | 5   | 7    | 10     | 3286 VAC   |
| 348 | 12    | 14   | 11   | 24.5 | 30  | 6   | 6    | 10     | 3401 VAC   |
| 349 | 8     | 11   | 8    | 13   | 7   | 4   | 4    | 3      | 3040 VAC   |
| 350 | 8     | 13   | 9    | 14   | 7   | 5   | 5    | 4      | 3110 VAC   |
| 351 | 6     | 11   | 6    | 6    | 4   | 4   | 4    | 2      | 2145 VAC   |
| 352 | 7     | 11   | 8    | 7    | 4   | 4   | 4    | 2      | 2131.5 VAC |
| 353 | 11    | 14.5 | 8    | 11.5 | 6   | 5.5 | 5    | 2      | 4539 VAC   |
| 354 | 13    | 19   | 8    | 14   | 8   | 6   | 6    | 3      | 5806.5 VAC |
| 355 | 8     | 11   | 9    | 8    | 6   | 5   | 4    | 3      | 2342.5 VAC |
| 356 | 8     | 12   | 8    | 8    | 7   | 7   | 4    | 3      | 2502 VAC   |
| 357 | 8     | 14   | 7    | 16.5 | 7   | 7   | 7    | 5      | 3686 VAC   |
| 358 | 7     | 12   | 7    | 13   | 6   | 5   | 4    | 3      | 3208 VAC   |
| 359 | 12    | 11   | 7    | 10   | 4   | 6   | 5    | 3      | 4022 VAC   |
| 360 | 13    | 13   | 7    | 10   | 5.5 | 7   | 5    | 5      | 4475 VAC   |
| 361 | 12    | 13   | 16.5 | 14.5 | 5   | 5.5 | 237  | 153    | 42 REO     |
| 362 | 15    | 18   | 27   | 29   | 6   | 8   | 369  | 95     | 40 REO     |
| 363 | 708.5 | 14   | 17   | 15   | 5   | 4.5 | 15   | 8      | 7 EDI      |
| 364 | 12    | 113  | 19   | 15   | 5   | 7   | 16   | 83     | 27 GD7     |
| 365 | 14    | 1303 | 21   | 28   | 5   | 6   | 16   | 138    | 16 GD7     |
| 366 | 10    | 444  | 18   | 14.5 | 6   | 6   | 14   | 16     | 6 GD7      |
| 367 | 10    | 441  | 17   | 15   | 5   | 5   | 14.5 | 12     | 7 GD7      |
| 368 | 12    | 16   | 19   | 71   | 5   | 5   | 15   | 163    | 19 NEG     |
| 369 | 13    | 40   | 18   | 136  | 5   | 6   | 16   | 118    | 11 MVM     |
| 370 | 12    | 19   | 18   | 49   | 8   | 6   | 13   | 67     | 7 NEG      |
| 371 | 14    | 20   | 20   | 45   | 7   | 6   | 13   | 72     | 7 NEG      |
| 372 | 12    | 15   | 17.5 | 21   | 4   | 6   | 15   | 43     | 8 NEG      |
| 373 | 15    | 13   | 20   | 16   | 4   | 5   | 14   | 7      | 33 NEG     |
| 374 | 16    | 13   | 20   | 16   | 5   | 5   | 13   | 134    | 10 NEG     |

|     |      |       |       |       |   |        |      |      |      |     |
|-----|------|-------|-------|-------|---|--------|------|------|------|-----|
| 375 | 13   | 17    | 20    | 21    | 5 | 5      | 14   | 141  | 23   | NEG |
| 376 | 13   | 17    | 22    | 19    | 4 | 5      | 14.5 | 128  | 10   | NEG |
| 377 | 12   | 16    | 18    | 16    | 5 | 1097.5 | 15   | 8    | 12   | PVM |
| 378 | 12   | 15    | 18    | 15    | 5 | 1164   | 14   | 122  | 12   | PVM |
| 379 | 10   | 15    | 19    | 16    | 4 | 1454   | 12   | 164  | 12   | PVM |
| 380 | 10   | 13    | 16.5  | 15    | 4 | 1410   | 13   | 34   | 6    | PVM |
| 381 | 12   | 19    | 21    | 25.5  | 5 | 891    | 14   | 70   | 41   | PVM |
| 382 | 10   | 14    | 16    | 17    | 4 | 717.5  | 11.5 | 7    | 6.5  | PVM |
| 383 | 10   | 13    | 15.5  | 16    | 3 | 754.5  | 14   | 6    | 6    | PVM |
| 384 | 10   | 12    | 15    | 15    | 4 | 998.5  | 14   | 16   | 7    | PVM |
| 385 | 14   | 15    | 21    | 30    | 7 | 6      | 396  | 65   | 4    | REO |
| 386 | 11   | 15    | 17.5  | 16    | 5 | 6      | 101  | 40   | 6    | NEG |
| 387 | 12   | 15    | 19    | 28    | 5 | 6      | 351  | 20   | 8    | REO |
| 388 | 11   | 16    | 21    | 15    | 5 | 5      | 14   | 1934 | 11   | SEN |
| 389 | 11   | 110.5 | 19    | 15    | 6 | 6      | 14   | 78   | 41   | GD7 |
| 390 | 11   | 14    | 16    | 21    | 4 | 6      | 14   | 45.5 | 8    | NEG |
| 391 | 2706 | 18    | 27    | 26    | 6 | 7      | 17   | 97   | 32   | EDI |
| 392 | 1140 | 18    | 27    | 30    | 8 | 9      | 18   | 165  | 6    | EDI |
| 393 | 969  | 15    | 211   | 20    | 7 | 7      | 15   | 104  | 17   | EDI |
| 394 | 2019 | 18.5  | 18    | 20    | 5 | 6      | 14   | 10   | 10   | EDI |
| 395 | 1866 | 15    | 17    | 18    | 5 | 5      | 14   | 9    | 9    | EDI |
| 396 | 719  | 14    | 17    | 16    | 5 | 5      | 14   | 8    | 7    | EDI |
| 397 | 18.5 | 145.5 | 17    | 19    | 6 | 8      | 15.5 | 83   | 38   | GD7 |
| 398 | 15   | 1313  | 23    | 29    | 9 | 8      | 15   | 44   | 41   | GD7 |
| 399 | 12   | 413   | 17    | 15    | 4 | 5      | 15   | 11   | 6    | GD7 |
| 400 | 12   | 413.5 | 18    | 14    | 4 | 5.5    | 13.5 | 10   | 6    | GD7 |
| 401 | 10.5 | 635   | 18    | 13    | 5 | 6      | 15   | 11   | 7    | GD7 |
| 402 | 11   | 621   | 18    | 14    | 4 | 4      | 14.5 | 11   | 6    | GD7 |
| 403 | 13   | 209   | 20    | 19    | 4 | 6      | 13   | 30   | 7    | GD7 |
| 404 | 12   | 509.5 | 18    | 17    | 5 | 7      | 16   | 11   | 8.5  | GD7 |
| 405 | 16   | 441.5 | 22    | 37    | 6 | 7      | 14   | 32   | 11.5 | GD7 |
| 406 | 14   | 2279  | 17    | 18    | 5 | 8      | 17   | 17   | 8    | GD7 |
| 407 | 13   | 15    | 249.5 | 15    | 6 | 6      | 13   | 123  | 39   | MHV |
| 408 | 13   | 13    | 253.5 | 16    | 5 | 8      | 15   | 27   | 11   | MHV |
| 409 | 15   | 20    | 143.5 | 27    | 6 | 8      | 14   | 165  | 37   | NEG |
| 410 | 12   | 16    | 95    | 22.5  | 4 | 6      | 14   | 81   | 8    | NEG |
| 411 | 11   | 16    | 325   | 16    | 6 | 7      | 14   | 15   | 9    | MHV |
| 412 | 14   | 15    | 19    | 71    | 6 | 6      | 15.5 | 163  | 11   | NEG |
| 413 | 12   | 39    | 19    | 128.5 | 4 | 6      | 14   | 18   | 32   | MVM |
| 414 | 11   | 15    | 16    | 13    | 6 | 5      | 14   | 14   | 7    | NEG |
| 415 | 10.5 | 14.5  | 17    | 12.5  | 7 | 6      | 12   | 16   | 6    | NEG |
| 416 | 19   | 24.5  | 28    | 77    | 8 | 8      | 18   | 137  | 44   | NEG |
| 417 | 15   | 18    | 24    | 28    | 8 | 9      | 16   | 37   | 11   | NEG |
| 418 | 14   | 16    | 20    | 26    | 6 | 6      | 17   | 5    | 25   | NEG |
| 419 | 14   | 20    | 23    | 27    | 7 | 6      | 14   | 88   | 17   | NEG |
| 420 | 12   | 14    | 17    | 18    | 5 | 1107   | 13   | 70   | 24   | PVM |
| 421 | 12   | 14    | 18    | 18    | 5 | 1246   | 14   | 75   | 25   | PVM |

|     |      |      |      |      |     |        |       |        |            |
|-----|------|------|------|------|-----|--------|-------|--------|------------|
| 422 | 12   | 15   | 20   | 19   | 5   | 932.5  | 15    | 162    | 25 PVM     |
| 423 | 13   | 14   | 19   | 19   | 4   | 870.5  | 14    | 152    | 15 PVM     |
| 424 | 15   | 16   | 18   | 21   | 6   | 1707   | 17    | 31     | 16 PVM     |
| 425 | 14   | 18   | 20   | 31.5 | 7   | 862    | 15    | 18     | 41 PVM     |
| 426 | 13   | 17   | 20   | 24   | 5   | 837    | 14    | 70     | 33 PVM     |
| 427 | 23   | 15   | 16   | 13   | 7   | 1049   | 13    | 24     | 11 PVM     |
| 428 | 25.5 | 14   | 16   | 14   | 7   | 1039   | 13    | 159    | 42 PVM     |
| 429 | 14   | 16.5 | 21   | 28   | 6   | 383    | 13    | 34     | 9 PVM      |
| 430 | 15   | 20   | 28   | 37   | 5   | 650    | 13    | 38     | 8 PVM      |
| 431 | 12   | 19   | 20.5 | 16   | 5   | 1562   | 13    | 8      | 9.5 PVM    |
| 432 | 11   | 12   | 16   | 15   | 5   | 1064   | 15    | 10     | 7 PVM      |
| 433 | 13   | 14   | 17   | 19   | 5   | 1055   | 15    | 12     | 7 PVM      |
| 434 | 11   | 13   | 17   | 24   | 5   | 1548.5 | 14    | 19.5   | 9 PVM      |
| 435 | 11   | 15   | 17   | 23   | 5   | 1619   | 17    | 19     | 7 PVM      |
| 436 | 10   | 12   | 16   | 14   | 4.5 | 1024   | 15.5  | 16     | 7 PVM      |
| 437 | 14.5 | 40   | 49   | 35   | 6   | 7      | 391.5 | 111    | 43 REO     |
| 438 | 14   | 17   | 25.5 | 29   | 6   | 6      | 329   | 149    | 26 REO     |
| 439 | 12   | 13   | 17   | 16   | 5   | 7      | 239.5 | 114    | 24 REO     |
| 440 | 13   | 11   | 16   | 12   | 4   | 4      | 354   | 23     | 33 REO     |
| 441 | 12   | 13   | 16   | 13   | 3   | 4      | 366   | 138    | 20 REO     |
| 442 | 12   | 13   | 18   | 13   | 4   | 4      | 143   | 138    | 42 REO     |
| 443 | 11   | 12   | 16   | 13   | 4   | 5      | 147   | 123    | 28 REO     |
| 444 | 14   | 17   | 19   | 16   | 4   | 6      | 89    | 8      | 8 NEG      |
| 445 | 11   | 14   | 19   | 16   | 5   | 5      | 116.5 | 48.5   | 7 NEG      |
| 446 | 12   | 15   | 17   | 14   | 4   | 6      | 139   | 22     | 8 REO      |
| 447 | 13   | 15.5 | 19   | 25   | 7   | 7      | 286.5 | 20     | 8 REO      |
| 448 | 14   | 16   | 18.5 | 28   | 6.5 | 7      | 568   | 71     | 10 REO     |
| 449 | 12   | 16   | 19   | 28   | 7   | 7      | 600   | 73     | 11 REO     |
| 450 | 11   | 13   | 35   | 22.5 | 6   | 5      | 260   | 29     | 8 REO      |
| 451 | 12   | 14   | 35   | 24   | 5   | 6      | 258.5 | 31     | 8 REO      |
| 452 | 13   | 14   | 20   | 32   | 6   | 6      | 361   | 23     | 7 REO      |
| 453 | 11   | 39   | 16.5 | 22   | 4   | 5      | 227   | 25     | 7 REO      |
| 454 | 12   | 16   | 20   | 16   | 5   | 6      | 14    | 2585   | 11 SEN     |
| 455 | 15   | 17   | 22   | 25   | 5   | 8      | 15    | 3935   | 9 SEN      |
| 456 | 13   | 16   | 20   | 21   | 5   | 5      | 13    | 4346   | 9 SEN      |
| 457 | 13   | 14   | 17   | 19   | 4.5 | 5      | 13    | 4088   | 10 SEN     |
| 458 | 11   | 16   | 19   | 14   | 4   | 5      | 14    | 1724   | 10.5 SEN   |
| 459 | 13   | 14   | 19.5 | 20   | 5   | 7      | 14    | 9629.5 | 19 SEN     |
| 460 | 13   | 17   | 24   | 36   | 8   | 6      | 16    | 6639   | 15 SEN     |
| 461 | 13   | 30   | 22   | 29   | 4   | 5      | 15    | 20     | 2850 VAC   |
| 462 | 24   | 25   | 22.5 | 45   | 5   | 6      | 15    | 9      | 4270 VAC   |
| 463 | 24   | 25   | 24.5 | 45   | 5   | 6      | 15    | 10     | 4064 VAC   |
| 464 | 17   | 29   | 27   | 20   | 5   | 6      | 16    | 14     | 1120.5 VAC |
| 465 | 16   | 20.5 | 21.5 | 41   | 6   | 8      | 15    | 48.5   | 2767 VAC   |
| 466 | 13   | 16   | 17   | 15   | 4.5 | 6      | 15    | 11     | 3583 VAC   |
| 467 | 12   | 16   | 17   | 16   | 4   | 5      | 13    | 10     | 3634.5 VAC |
| 468 | 11   | 13   | 18   | 16   | 6   | 8      | 17    | 11     | 3408 VAC   |

|     |        |        |       |      |     |     |      |      |          |
|-----|--------|--------|-------|------|-----|-----|------|------|----------|
| 469 | 965    | 18     | 20    | 22   | 6   | 7   | 15   | 11   | 9 EDI    |
| 470 | 14     | 15     | 410   | 18   | 8   | 9   | 17   | 12   | 9 MHV    |
| 471 | 12     | 14     | 321   | 16   | 6   | 8   | 16   | 14   | 8 MHV    |
| 472 | 14     | 19     | 23    | 29   | 6   | 5   | 15   | 103  | 9 NEG    |
| 473 | 13     | 18     | 18    | 16   | 5   | 6   | 107  | 10   | 7 NEG    |
| 474 | 14     | 17     | 20    | 29   | 6   | 7   | 14   | 3803 | 10 SEN   |
| 475 | 10     | 12.5   | 16.5  | 14   | 5   | 9   | 18   | 12   | 3280 VAC |
| 476 | 1941.5 | 20     | 20    | 26   | 11  | 8   | 18   | 63   | 14 EDI   |
| 477 | 797.5  | 20     | 23    | 33.5 | 8.5 | 8   | 17   | 112  | 6 EDI    |
| 478 | 2546   | 17     | 22    | 24   | 7   | 6   | 16   | 57   | 41 EDI   |
| 479 | 1786   | 14     | 18    | 15   | 5   | 8   | 15   | 51   | 24 EDI   |
| 480 | 987    | 15     | 195.5 | 20   | 5   | 6   | 15   | 122  | 11 EDI   |
| 481 | 2359.5 | 18     | 25    | 19   | 8   | 5.5 | 14   | 16   | 8 EDI    |
| 482 | 3563   | 15     | 17    | 24   | 5   | 10  | 20   | 19.5 | 9 EDI    |
| 483 | 3592.5 | 15     | 18    | 24   | 6   | 9   | 20   | 19   | 10 EDI   |
| 484 | 19     | 151    | 17    | 20   | 6   | 7   | 15   | 126  | 22 GD7   |
| 485 | 17     | 1368   | 24    | 33   | 9   | 8   | 15   | 99   | 38 GD7   |
| 486 | 16     | 132    | 25    | 27   | 6   | 7   | 16   | 151  | 19 GD7   |
| 487 | 16     | 1736   | 24    | 37   | 6   | 7   | 17   | 31   | 26 GD7   |
| 488 | 11     | 619.5  | 16    | 14   | 4   | 5   | 15   | 39   | 17 GD7   |
| 489 | 12     | 1534   | 21    | 17   | 6   | 7   | 16   | 9    | 9 GD7    |
| 490 | 13     | 1145.5 | 22.5  | 26   | 6   | 6.5 | 15   | 47   | 17 GD7   |
| 491 | 25     | 526    | 45    | 30   | 6   | 7   | 18   | 91   | 11 GD7   |
| 492 | 13     | 757    | 23    | 29   | 8   | 7   | 14   | 53   | 7 GD7    |
| 493 | 13     | 672    | 19    | 17   | 6   | 7   | 14   | 9.5  | 8 GD7    |
| 494 | 14     | 197    | 20    | 22   | 4   | 6   | 16   | 31   | 7 GD7    |
| 495 | 13.5   | 504.5  | 17    | 18   | 5   | 7   | 15   | 11   | 8 GD7    |
| 496 | 14     | 3158   | 18    | 20   | 6   | 8   | 17   | 19   | 8 GD7    |
| 497 | 16     | 2237   | 19    | 18   | 5   | 8   | 16   | 16   | 8 GD7    |
| 498 | 15     | 17.5   | 685   | 20   | 8   | 9   | 18   | 123  | 33 MHV   |
| 499 | 17     | 19     | 135   | 40   | 7.5 | 9   | 19   | 42   | 25 NEG   |
| 500 | 16     | 20     | 130   | 38   | 6   | 8   | 18   | 123  | 41 NEG   |
| 501 | 15     | 17     | 106   | 36   | 10  | 8   | 18   | 35   | 27 NEG   |
| 502 | 13     | 15     | 94    | 22   | 5   | 5.5 | 13   | 77.5 | 8 NEG    |
| 503 | 15     | 20     | 107   | 30.5 | 6   | 7   | 15   | 28   | 8 NEG    |
| 504 | 15     | 22     | 116   | 34   | 8   | 6.5 | 16.5 | 30   | 9 NEG    |
| 505 | 13     | 14     | 325   | 18   | 7   | 8   | 16   | 29   | 8.5 MHV  |
| 506 | 12     | 16     | 317   | 18   | 6   | 8   | 16   | 27   | 8 MHV    |
| 507 | 16     | 19     | 29    | 115  | 7   | 8   | 16   | 84   | 5 MVM    |
| 508 | 16     | 20     | 30.5  | 114  | 8   | 6   | 16   | 33   | 5 MVM    |
| 509 | 14     | 22     | 20    | 99.5 | 5   | 6   | 14   | 68   | 19 MVM   |
| 510 | 13     | 44     | 21.5  | 70.5 | 6   | 7   | 16   | 33   | 10 NEG   |
| 511 | 15     | 88     | 23    | 35   | 10  | 7   | 18   | 31.5 | 9 NEG    |
| 512 | 14     | 21     | 19    | 238  | 7   | 7   | 16   | 15   | 10 MVM   |
| 513 | 14     | 34     | 18.5  | 161  | 7   | 8   | 19   | 33   | 10 MVM   |
| 514 | 20     | 18     | 22    | 93   | 7   | 9   | 17.5 | 171  | 11 MVM   |
| 515 | 18     | 26     | 32    | 56   | 8   | 8   | 16   | 216  | 14 NEG   |

|     |      |      |      |    |     |        |       |       |        |
|-----|------|------|------|----|-----|--------|-------|-------|--------|
| 516 | 16   | 19   | 20   | 24 | 7   | 7      | 15    | 35    | 12 NEG |
| 517 | 14   | 17.5 | 22   | 21 | 6   | 6      | 14    | 106   | 5 NEG  |
| 518 | 14   | 20   | 20   | 19 | 6   | 5      | 16    | 150   | 40 NEG |
| 519 | 15   | 18   | 21   | 23 | 5   | 7      | 17    | 93    | 8 NEG  |
| 520 | 15   | 18   | 22   | 27 | 7   | 8.5    | 15    | 198   | 9 NEG  |
| 521 | 16   | 18   | 21   | 29 | 6   | 8      | 17    | 188.5 | 10 NEG |
| 522 | 15   | 21.5 | 26   | 28 | 6   | 6      | 17    | 41    | 25 NEG |
| 523 | 15   | 23   | 25   | 27 | 8   | 5      | 17    | 92    | 30 NEG |
| 524 | 16   | 18   | 21   | 23 | 10  | 10     | 19    | 45    | 11 NEG |
| 525 | 18   | 26   | 28   | 36 | 6   | 7      | 17    | 104   | 37 NEG |
| 526 | 18   | 19   | 21   | 23 | 6   | 6      | 16    | 66    | 27 NEG |
| 527 | 12   | 15   | 17   | 18 | 5   | 1137.5 | 14.5  | 110   | 4 PVM  |
| 528 | 12.5 | 15   | 20   | 19 | 4   | 1264   | 14    | 162   | 43 PVM |
| 529 | 13   | 17   | 21   | 18 | 6   | 1415.5 | 15    | 63    | 13 PVM |
| 530 | 13   | 17   | 20   | 17 | 6   | 1373   | 15.5  | 8     | 30 PVM |
| 531 | 14.5 | 18   | 19   | 24 | 7   | 1843   | 17    | 108   | 18 PVM |
| 532 | 14   | 17   | 22   | 35 | 6   | 826    | 16    | 36    | 11 PVM |
| 533 | 15   | 18   | 24   | 36 | 6   | 904    | 15    | 163   | 35 PVM |
| 534 | 14   | 17   | 21   | 29 | 7   | 879    | 15    | 140   | 40 PVM |
| 535 | 12   | 16   | 19   | 18 | 6   | 1586   | 14    | 9     | 8 PVM  |
| 536 | 14   | 17   | 22   | 29 | 6   | 384    | 14    | 36    | 10 PVM |
| 537 | 16   | 21   | 27   | 38 | 7   | 659    | 14    | 39    | 8 PVM  |
| 538 | 13   | 19   | 22   | 17 | 6   | 1588   | 16    | 8     | 10 PVM |
| 539 | 9    | 12   | 16   | 16 | 5   | 1027.5 | 14    | 9     | 7 PVM  |
| 540 | 17   | 18   | 22   | 36 | 7   | 526    | 16    | 46    | 10 PVM |
| 541 | 16   | 18   | 23   | 37 | 8   | 515.5  | 15.5  | 44    | 11 PVM |
| 542 | 13   | 16   | 19   | 21 | 7   | 734    | 15    | 13    | 12 PVM |
| 543 | 19   | 21   | 25   | 48 | 9   | 953    | 18    | 44    | 12 PVM |
| 544 | 13   | 14   | 19   | 19 | 4   | 1042   | 15    | 12    | 8 PVM  |
| 545 | 14   | 40   | 52   | 34 | 6   | 6      | 397.5 | 46    | 27 REO |
| 546 | 13   | 14   | 18   | 30 | 7   | 6      | 350   | 5     | 26 REO |
| 547 | 16   | 21   | 26   | 32 | 10  | 11     | 353.5 | 9     | 31 REO |
| 548 | 14   | 20   | 23   | 29 | 8   | 9      | 285.5 | 101   | 28 REO |
| 549 | 16   | 20   | 25.5 | 38 | 8   | 9      | 464   | 66    | 36 REO |
| 550 | 13   | 12   | 18   | 16 | 5   | 6      | 303.5 | 103   | 19 REO |
| 551 | 13   | 13   | 16   | 16 | 5   | 5      | 286   | 28    | 42 REO |
| 552 | 13   | 16   | 21   | 16 | 5   | 7      | 94    | 8     | 7 NEG  |
| 553 | 14   | 15   | 20   | 15 | 6   | 7      | 167   | 10    | 7 REO  |
| 554 | 20   | 14   | 18   | 14 | 5   | 9      | 114   | 9     | 8 NEG  |
| 555 | 21.5 | 14   | 18   | 14 | 5.5 | 8      | 111   | 9     | 7 NEG  |
| 556 | 12   | 15   | 17   | 12 | 5   | 6      | 181.5 | 10    | 8 REO  |
| 557 | 14   | 16   | 18   | 14 | 5   | 7      | 195   | 10    | 9 REO  |
| 558 | 15   | 18   | 28   | 33 | 6   | 6      | 147   | 63    | 9 REO  |
| 559 | 13   | 19   | 28   | 31 | 6   | 6      | 131   | 53    | 7 REO  |
| 560 | 13   | 50   | 18   | 16 | 5   | 7      | 227   | 53    | 9 REO  |
| 561 | 18   | 18   | 33   | 44 | 8   | 9      | 266   | 37.5  | 9 REO  |
| 562 | 12   | 14   | 18   | 24 | 6   | 7      | 298   | 18    | 8 REO  |

|     |        |        |      |      |    |        |      |        |          |
|-----|--------|--------|------|------|----|--------|------|--------|----------|
| 563 | 13     | 16     | 18   | 15   | 6  | 6      | 16   | 2908   | 12 SEN   |
| 564 | 13     | 18     | 24   | 27.5 | 9  | 9      | 17   | 2160   | 13 SEN   |
| 565 | 13     | 18     | 23   | 38   | 7  | 6      | 15.5 | 6610   | 17 SEN   |
| 566 | 13     | 15     | 19   | 18   | 5  | 6      | 17   | 2281   | 13 SEN   |
| 567 | 12     | 14     | 19   | 19   | 5  | 7      | 14   | 7076   | 12 SEN   |
| 568 | 16     | 18     | 24   | 46   | 7  | 8      | 17   | 9320   | 18 SEN   |
| 569 | 12     | 32     | 21   | 34   | 5  | 6      | 15   | 20     | 3039 VAC |
| 570 | 17     | 20     | 20   | 31   | 7  | 7      | 14   | 27     | 217 NEG  |
| 571 | 14     | 18     | 21   | 28   | 9  | 10     | 15.5 | 78     | 2068 VAC |
| 572 | 15     | 22     | 20   | 48   | 7  | 7      | 15   | 62     | 2778 VAC |
| 573 | 12     | 14     | 21   | 29   | 7  | 9      | 16   | 11     | 988 VAC  |
| 574 | 14     | 16     | 20   | 29   | 7  | 8      | 19   | 12     | 1049 VAC |
| 575 | 13     | 19     | 18   | 34   | 7  | 8      | 17   | 15     | 5822 VAC |
| 576 | 15     | 20     | 21   | 38   | 8  | 8      | 16   | 177    | 896 VAC  |
| 577 | 265    | 19     | 93.5 | 21   | 8  | 10     | 22   | 12     | 10 EDI   |
| 578 | 2300.5 | 17     | 23   | 18   | 7  | 6      | 16   | 17     | 8 EDI    |
| 579 | 1106   | 22     | 26   | 23   | 6  | 7      | 16   | 11     | 10 EDI   |
| 580 | 15     | 30     | 20   | 182  | 7  | 7      | 17   | 160    | 26 MVM   |
| 581 | 15     | 18     | 21   | 20   | 9  | 9      | 20   | 48     | 11 NEG   |
| 582 | 13     | 15     | 18   | 18   | 5  | 1578.5 | 15.5 | 10     | 8.5 PVM  |
| 583 | 12     | 17     | 19   | 15.5 | 5  | 7      | 106  | 10     | 7 NEG    |
| 584 | 13     | 15     | 18   | 22   | 5  | 8      | 508  | 15     | 9 REO    |
| 585 | 17     | 25     | 27   | 33   | 6  | 7      | 17.5 | 8349   | 23 SEN   |
| 586 | 12     | 14     | 19   | 18   | 5  | 8      | 16   | 2498.5 | 12 SEN   |
| 587 | 758    | 19     | 23   | 34   | 10 | 9      | 16   | 101    | 7 EDI    |
| 588 | 1681   | 19     | 20   | 22   | 9  | 8      | 16   | 46     | 41 EDI   |
| 589 | 852    | 20     | 23   | 31   | 8  | 8      | 15   | 54     | 26 EDI   |
| 590 | 1817.5 | 14     | 17   | 15   | 7  | 7      | 15   | 39     | 21 EDI   |
| 591 | 274    | 19     | 98   | 22   | 6  | 8.5    | 20   | 13     | 10 EDI   |
| 592 | 762.5  | 19     | 22   | 29   | 9  | 9.5    | 16   | 68.5   | 12 EDI   |
| 593 | 997    | 18     | 22   | 23   | 6  | 7      | 16.5 | 12     | 10 EDI   |
| 594 | 1035   | 22     | 24   | 28.5 | 9  | 11     | 23   | 30     | 18 EDI   |
| 595 | 19     | 1541   | 27   | 45   | 9  | 10     | 17   | 78     | 33 GD7   |
| 596 | 15     | 127    | 24   | 28   | 6  | 9      | 15   | 68     | 32 GD7   |
| 597 | 15.5   | 181    | 23.5 | 35   | 7  | 7      | 16   | 106    | 18 GD7   |
| 598 | 12     | 591.5  | 17   | 14   | 4  | 6      | 13   | 67     | 36 GD7   |
| 599 | 12     | 1549   | 21   | 19   | 4  | 7      | 18   | 9      | 7 GD7    |
| 600 | 15     | 1173.5 | 21   | 28.5 | 5  | 7      | 15   | 51     | 19 GD7   |
| 601 | 23     | 520.5  | 49   | 34   | 6  | 7      | 15   | 85     | 11 GD7   |
| 602 | 15     | 1571   | 26   | 33   | 7  | 7      | 17   | 32     | 9 GD7    |
| 603 | 15     | 1765   | 26   | 35   | 8  | 9      | 17   | 33.5   | 9 GD7    |
| 604 | 14     | 781.5  | 24   | 33   | 9  | 8      | 15   | 54     | 8 GD7    |
| 605 | 15     | 120    | 23   | 39   | 6  | 6      | 16   | 75.5   | 9 GD7    |
| 606 | 15     | 3243   | 18   | 19   | 6  | 7      | 14   | 20     | 9 GD7    |
| 607 | 15     | 120    | 25   | 37   | 10 | 9      | 16   | 100    | 11 GD7   |
| 608 | 16     | 127    | 22   | 39   | 10 | 8      | 17   | 112    | 10 GD7   |
| 609 | 12     | 216    | 19   | 19   | 6  | 8      | 15   | 14     | 9 GD7    |

|     |      |       |        |      |    |       |       |       |      |     |
|-----|------|-------|--------|------|----|-------|-------|-------|------|-----|
| 610 | 16   | 446.5 | 21     | 39   | 7  | 8     | 15.5  | 30    | 12   | GD7 |
| 611 | 15   | 18    | 674.5  | 20   | 8  | 8     | 17    | 84    | 28   | MHV |
| 612 | 14   | 18    | 1994.5 | 24   | 9  | 10    | 19    | 76    | 17   | MHV |
| 613 | 15   | 22    | 151.5  | 26.5 | 7  | 7     | 17    | 44    | 36   | NEG |
| 614 | 16   | 17    | 56     | 27   | 7  | 8     | 16    | 127   | 16   | NEG |
| 615 | 13   | 19    | 150    | 30   | 6  | 6     | 16    | 15    | 9    | NEG |
| 616 | 15   | 23    | 180    | 30   | 11 | 10    | 17.5  | 16    | 11   | MHV |
| 617 | 14   | 16    | 256    | 20   | 9  | 9     | 17    | 14    | 10   | MHV |
| 618 | 14   | 17    | 259    | 21   | 10 | 11    | 18    | 13    | 9    | MHV |
| 619 | 13   | 16    | 417    | 18   | 7  | 9     | 19    | 13    | 8    | MHV |
| 620 | 13   | 14    | 328    | 16   | 7  | 7     | 16    | 14    | 8    | MHV |
| 621 | 15   | 27    | 20     | 189  | 7  | 8     | 16    | 111   | 37   | MVM |
| 622 | 13   | 46    | 21     | 74   | 7  | 7.5   | 16    | 34    | 10   | NEG |
| 623 | 19   | 18    | 24     | 98   | 7  | 9.5   | 17.5  | 177   | 12   | MVM |
| 624 | 23   | 28    | 28     | 31   | 7  | 6     | 18    | 163   | 41   | NEG |
| 625 | 17   | 20    | 23     | 79   | 14 | 13    | 17.5  | 34    | 11   | NEG |
| 626 | 13   | 17    | 20     | 16   | 7  | 9.5   | 16    | 115   | 8    | NEG |
| 627 | 13   | 18    | 20     | 18   | 7  | 9     | 18    | 54    | 35   | NEG |
| 628 | 22   | 27    | 38     | 65.5 | 11 | 9     | 19    | 234   | 16   | SEN |
| 629 | 15   | 23    | 30     | 22.5 | 6  | 6     | 17    | 56    | 10   | NEG |
| 630 | 16   | 22    | 27     | 40   | 7  | 9     | 16    | 29.5  | 12   | NEG |
| 631 | 14   | 16    | 22     | 26   | 9  | 7     | 15    | 89    | 29   | NEG |
| 632 | 14   | 16    | 21     | 26   | 9  | 9     | 16    | 145   | 19   | NEG |
| 633 | 14   | 18    | 22     | 23   | 10 | 9     | 16    | 53    | 14   | NEG |
| 634 | 19.5 | 22.5  | 30     | 29   | 9  | 11    | 18    | 96    | 13   | NEG |
| 635 | 15   | 21    | 21     | 19   | 6  | 9     | 15    | 81    | 8    | NEG |
| 636 | 16   | 20    | 20     | 19   | 7  | 8     | 16    | 78    | 9    | NEG |
| 637 | 30   | 21    | 26     | 29.5 | 11 | 12    | 17    | 180.5 | 13   | NEG |
| 638 | 20   | 19    | 24     | 20   | 9  | 10    | 19    | 120   | 9    | NEG |
| 639 | 18   | 24    | 26     | 42.5 | 7  | 8     | 16    | 123.5 | 15   | NEG |
| 640 | 15.5 | 21    | 24     | 22   | 11 | 11    | 16    | 19    | 29   | NEG |
| 641 | 16   | 23    | 24     | 21   | 10 | 11.5  | 15    | 53    | 38   | NEG |
| 642 | 17   | 26    | 28     | 39   | 7  | 8     | 15    | 156   | 37   | NEG |
| 643 | 16   | 20    | 23     | 23   | 5  | 6.5   | 14    | 113   | 30   | NEG |
| 644 | 16   | 17    | 20     | 20   | 9  | 9     | 20    | 29    | 11   | NEG |
| 645 | 16   | 21    | 26     | 23   | 10 | 1020  | 20    | 57    | 25   | PVM |
| 646 | 14   | 20    | 22     | 26   | 12 | 821   | 16    | 31.5  | 11   | PVM |
| 647 | 19   | 22    | 26     | 46   | 10 | 931.5 | 19    | 42.5  | 12   | PVM |
| 648 | 14   | 15    | 19     | 19   | 6  | 1618  | 16    | 19.5  | 9    | PVM |
| 649 | 14   | 19    | 20     | 16   | 5  | 6     | 172.5 | 11    | 8    | REO |
| 650 | 14   | 19.5  | 48     | 30   | 8  | 7     | 375   | 16    | 9    | REO |
| 651 | 14   | 20    | 43     | 28   | 8  | 7     | 328   | 15    | 8    | REO |
| 652 | 13   | 53    | 18     | 17   | 5  | 6.5   | 236.5 | 53    | 8    | REO |
| 653 | 11   | 14    | 17     | 14   | 4  | 5     | 133   | 22    | 6    | REO |
| 654 | 14   | 14    | 18     | 17   | 6  | 6     | 184   | 16    | 8    | REO |
| 655 | 13   | 15    | 18     | 19.5 | 6  | 8     | 529.5 | 15    | 10.5 | REO |
| 656 | 13.5 | 46.5  | 21     | 21   | 8  | 7     | 234   | 26.5  | 10   | REO |

|     |        |      |      |      |     |        |       |        |            |
|-----|--------|------|------|------|-----|--------|-------|--------|------------|
| 657 | 12     | 16   | 19   | 17   | 6   | 6      | 14    | 2674   | 11 SEN     |
| 658 | 14     | 16   | 19   | 18   | 5   | 6      | 14    | 2586.5 | 10 SEN     |
| 659 | 12     | 14   | 19   | 16   | 5   | 5.5    | 14    | 2611   | 11 SEN     |
| 660 | 18     | 30   | 33   | 41   | 8   | 9      | 17    | 11360  | 21 SEN     |
| 661 | 17     | 20   | 25   | 25.5 | 7.5 | 10     | 16    | 9180   | 27 SEN     |
| 662 | 16     | 20   | 24   | 27   | 8   | 8      | 17    | 8972   | 24.5 SEN   |
| 663 | 18     | 19.5 | 24   | 34   | 8   | 9      | 16    | 1696   | 13 SEN     |
| 664 | 14     | 15   | 22   | 24   | 7   | 7      | 18    | 2785   | 13 SEN     |
| 665 | 17     | 19   | 25   | 42.5 | 7   | 9      | 17    | 12160  | 19 SEN     |
| 666 | 17     | 19   | 26.5 | 42   | 7   | 9      | 18    | 12043  | 18 SEN     |
| 667 | 12     | 13   | 18   | 20   | 6   | 6      | 14    | 6769   | 13 SEN     |
| 668 | 17     | 17   | 23   | 45   | 7   | 9      | 17    | 9353   | 16 SEN     |
| 669 | 19     | 20   | 26   | 29   | 9   | 8      | 17    | 1161   | 15 SEN     |
| 670 | 16.5   | 21   | 25   | 30   | 8   | 9      | 17    | 1078   | 16 SEN     |
| 671 | 13.5   | 19   | 20   | 20   | 5   | 6      | 15    | 10     | 4730.5 VAC |
| 672 | 17     | 19   | 21   | 33   | 7   | 7      | 15    | 30     | 202 NEG    |
| 673 | 14     | 15   | 21   | 26   | 9   | 9      | 17    | 75     | 2067 VAC   |
| 674 | 16.5   | 22   | 22   | 32   | 12  | 11     | 17    | 53.5   | 2244 VAC   |
| 675 | 17     | 19   | 23   | 28   | 13  | 14     | 17.5  | 48.5   | 2228 VAC   |
| 676 | 18     | 18   | 21   | 36.5 | 6.5 | 9      | 18    | 58     | 1054 VAC   |
| 677 | 16     | 18   | 19   | 39.5 | 7   | 8      | 16.5  | 171    | 854 VAC    |
| 678 | 19     | 32.5 | 26   | 36   | 7   | 9      | 18    | 93     | 1941 VAC   |
| 679 | 19     | 36   | 27.5 | 36.5 | 7   | 7      | 19    | 99.5   | 1836.5 VAC |
| 680 | 18     | 104  | 21   | 22   | 11  | 12     | 16    | 14     | 10 GD7     |
| 681 | 16     | 19   | 118  | 43   | 7   | 8.5    | 16    | 13     | 11 NEG     |
| 682 | 16     | 20   | 160  | 37   | 8   | 8      | 16    | 39.5   | 10 NEG     |
| 683 | 15     | 22.5 | 20   | 105  | 6   | 6      | 15    | 5      | 18 MVM     |
| 684 | 14     | 34.5 | 18   | 163  | 7   | 9      | 24    | 38     | 10 MVM     |
| 685 | 16     | 18   | 22   | 27   | 10  | 9      | 17    | 16     | 12 NEG     |
| 686 | 18     | 27.5 | 25   | 26.5 | 9   | 11     | 20    | 80     | 14 NEG     |
| 687 | 19     | 19.5 | 24   | 28   | 10  | 1301.5 | 17.5  | 64     | 14 PVM     |
| 688 | 14     | 17   | 19   | 23   | 8   | 746    | 16    | 12     | 11 PVM     |
| 689 | 17     | 22   | 28   | 36   | 8   | 7      | 560.5 | 15     | 43 REO     |
| 690 | 20     | 18   | 20   | 33   | 12  | 13     | 684   | 66     | 10 REO     |
| 691 | 14     | 20   | 20   | 23   | 8   | 8      | 16    | 12     | 5310 VAC   |
| 692 | 725    | 20   | 23   | 33   | 9   | 6      | 15    | 141    | 18 EDI     |
| 693 | 1525   | 18   | 21   | 22   | 6   | 9      | 16    | 138    | 22 EDI     |
| 694 | 1364.5 | 20   | 32   | 34   | 11  | 10     | 20    | 120    | 22 EDI     |
| 695 | 690    | 19   | 23   | 27   | 10  | 9      | 19    | 67     | 12 EDI     |
| 696 | 1114.5 | 21   | 26   | 22   | 6.5 | 9      | 16    | 11     | 12 EDI     |
| 697 | 1187   | 19   | 26   | 25   | 9   | 9      | 18    | 22     | 14 EDI     |
| 698 | 1137.5 | 20   | 22   | 24   | 8   | 8      | 17    | 22     | 11 EDI     |
| 699 | 476    | 17   | 22   | 41   | 7   | 9      | 16    | 56     | 13 EDI     |
| 700 | 1094   | 20.5 | 23   | 30.5 | 8   | 9      | 22    | 30.5   | 19 EDI     |
| 701 | 21     | 1591 | 27   | 47   | 8   | 10     | 18    | 140    | 35 GD7     |
| 702 | 18     | 195  | 24   | 39   | 9   | 8      | 15    | 67     | 13 GD7     |
| 703 | 19     | 1007 | 24   | 29   | 5   | 8      | 16    | 20     | 42 GD7     |



|     |      |        |       |      |     |        |      |      |      |     |
|-----|------|--------|-------|------|-----|--------|------|------|------|-----|
| 704 | 17   | 1154.5 | 23    | 27   | 10  | 10     | 18   | 112  | 15   | GD7 |
| 705 | 13   | 652    | 18    | 18   | 7.5 | 7.5    | 15   | 9.5  | 8.5  | GD7 |
| 706 | 13   | 196    | 17    | 19   | 5   | 6      | 13   | 13   | 8    | GD7 |
| 707 | 18   | 101    | 22    | 22   | 10  | 12     | 16.5 | 13   | 9    | GD7 |
| 708 | 15   | 19     | 2057  | 25   | 11  | 11     | 19   | 157  | 22   | MHV |
| 709 | 21   | 26     | 219   | 50.5 | 14  | 12     | 22   | 42   | 7    | MHV |
| 710 | 19   | 20     | 229.5 | 25   | 9   | 10     | 28   | 40   | 17   | MHV |
| 711 | 17.5 | 20     | 107.5 | 35   | 11  | 9      | 19   | 88   | 22   | NEG |
| 712 | 15   | 17     | 109   | 44   | 7   | 9      | 17   | 13   | 11   | NEG |
| 713 | 13.5 | 18     | 156.5 | 33   | 7   | 8      | 17   | 15   | 10   | NEG |
| 714 | 15   | 27     | 159.5 | 28   | 11  | 9      | 18.5 | 16   | 10   | NEG |
| 715 | 12   | 15     | 353   | 16   | 8   | 8      | 17.5 | 17   | 10   | MHV |
| 716 | 15.5 | 95     | 25    | 38   | 11  | 7      | 17   | 32.5 | 9    | GD7 |
| 717 | 26   | 24     | 24    | 74   | 9   | 10     | 18   | 13   | 16   | NEG |
| 718 | 25   | 22.5   | 21    | 74.5 | 10  | 9      | 17   | 12   | 14   | NEG |
| 719 | 14   | 20     | 19    | 243  | 7   | 7      | 17   | 15   | 9    | MVM |
| 720 | 27   | 24     | 30    | 32   | 10  | 10.5   | 18   | 117  | 16   | NEG |
| 721 | 29   | 35     | 41    | 53   | 8   | 11     | 21   | 155  | 32   | NEG |
| 722 | 19   | 22     | 33    | 73   | 13  | 11     | 20   | 30   | 14   | NEG |
| 723 | 17   | 20     | 26    | 80   | 13  | 13.5   | 19   | 33   | 12   | NEG |
| 724 | 17   | 25     | 23    | 33.5 | 11  | 14     | 19   | 54.5 | 13   | NEG |
| 725 | 14   | 19     | 22    | 17   | 30  | 10     | 17   | 123  | 14   | NEG |
| 726 | 22   | 28     | 42    | 32.5 | 9   | 10     | 17   | 97   | 25   | NEG |
| 727 | 19   | 26     | 33    | 42   | 12  | 10     | 19.5 | 95   | 9    | NEG |
| 728 | 22   | 21     | 27.5  | 60   | 7   | 10     | 17   | 104  | 12   | NEG |
| 729 | 15   | 21.5   | 32    | 22   | 4   | 7      | 17   | 47.5 | 10   | NEG |
| 730 | 18   | 27     | 27    | 78.5 | 7   | 8      | 19   | 115  | 16   | NEG |
| 731 | 18   | 21     | 29    | 38.5 | 7   | 7      | 17   | 28   | 11   | NEG |
| 732 | 23   | 19     | 21    | 19   | 8   | 10     | 18.5 | 200  | 13   | NEG |
| 733 | 17   | 18     | 26    | 90   | 8   | 10     | 17.5 | 24   | 13   | NEG |
| 734 | 15   | 18     | 22    | 24   | 11  | 11     | 16   | 50.5 | 14   | NEG |
| 735 | 19   | 25     | 28    | 30   | 9.5 | 13     | 19   | 45   | 10   | NEG |
| 736 | 31   | 24     | 27    | 31   | 10  | 12     | 20   | 187  | 14   | NEG |
| 737 | 19   | 19     | 26    | 25   | 13  | 14     | 19   | 24   | 18.5 | NEG |
| 738 | 17   | 19     | 25.5  | 26   | 15  | 10.5   | 17.5 | 26   | 18   | NEG |
| 739 | 20.5 | 29     | 35    | 59   | 13  | 8.5    | 18   | 92   | 30   | NEG |
| 740 | 19   | 18     | 31    | 46   | 11  | 12     | 17   | 39   | 15   | NEG |
| 741 | 19   | 19.5   | 32    | 45   | 13  | 13.5   | 17   | 40   | 14   | NEG |
| 742 | 16   | 18     | 23.5  | 27   | 9   | 9      | 18   | 16   | 11   | NEG |
| 743 | 19   | 28     | 25    | 25.5 | 9   | 11     | 24   | 79   | 15   | NEG |
| 744 | 17   | 19     | 21    | 20   | 11  | 11     | 20   | 29.5 | 11   | NEG |
| 745 | 16   | 20     | 25    | 25.5 | 16  | 937    | 18   | 37   | 12   | PVM |
| 746 | 17   | 20     | 24    | 34   | 11  | 1372   | 18   | 67   | 10   | PVM |
| 747 | 16.5 | 22     | 27    | 38   | 10  | 1493   | 19   | 75   | 13   | PVM |
| 748 | 20   | 23     | 28    | 40   | 8   | 1137.5 | 19   | 67.5 | 11   | PVM |
| 749 | 20   | 24     | 29    | 36   | 10  | 1172   | 20   | 68.5 | 12   | PVM |
| 750 | 19   | 21     | 27.5  | 38   | 9   | 1730.5 | 18   | 108  | 11   | PVM |

|     |      |        |       |      |      |      |       |        |            |
|-----|------|--------|-------|------|------|------|-------|--------|------------|
| 751 | 14   | 17     | 19    | 20   | 6    | 1620 | 17    | 22     | 9 PVM      |
| 752 | 13   | 15     | 18    | 18   | 5    | 1366 | 16    | 26     | 8 PVM      |
| 753 | 18   | 25     | 29    | 38   | 9    | 1141 | 24.5  | 139    | 14 PVM     |
| 754 | 18   | 21     | 26    | 31   | 9    | 1209 | 24    | 132    | 13.5 PVM   |
| 755 | 20   | 26     | 30    | 53   | 16   | 14   | 697   | 25     | 10 REO     |
| 756 | 19   | 19     | 25    | 37   | 8    | 7    | 569   | 143    | 10 REO     |
| 757 | 15   | 22     | 25    | 17   | 5    | 6    | 288   | 12     | 9 REO      |
| 758 | 15   | 20     | 23    | 16   | 5    | 6    | 319   | 10     | 8 REO      |
| 759 | 17   | 19     | 20    | 16.5 | 6    | 7    | 159   | 13     | 12 REO     |
| 760 | 16   | 17     | 19    | 16   | 6    | 8    | 154   | 15     | 11 REO     |
| 761 | 14   | 15     | 17    | 18   | 5    | 7    | 191   | 19     | 8 REO      |
| 762 | 18   | 20     | 34    | 45   | 8    | 11   | 250.5 | 38     | 9.5 REO    |
| 763 | 12.5 | 16     | 20    | 17.5 | 6.5  | 7    | 14    | 2966   | 12 SEN     |
| 764 | 13   | 17     | 27    | 25   | 9.5  | 9    | 18    | 1981.5 | 14 SEN     |
| 765 | 13   | 14     | 19    | 20   | 4    | 6    | 13    | 8786   | 17 SEN     |
| 766 | 16   | 24     | 26    | 33   | 5    | 7    | 18    | 8415   | 18.5 SEN   |
| 767 | 18   | 21     | 25    | 34   | 8    | 9    | 18    | 1796   | 15 SEN     |
| 768 | 14   | 21     | 23    | 24   | 6    | 5    | 16    | 9      | 4598 VAC   |
| 769 | 14   | 21     | 20    | 25   | 7    | 7    | 14    | 11.5   | 4996 VAC   |
| 770 | 17   | 28     | 29    | 34   | 7    | 9    | 18    | 30     | 615.5 VAC  |
| 771 | 15   | 28     | 28    | 36   | 8    | 9    | 17    | 34     | 704 VAC    |
| 772 | 18   | 29     | 29    | 20   | 5    | 7    | 18    | 12     | 1109 VAC   |
| 773 | 19   | 20     | 19.5  | 30   | 7    | 13   | 18    | 22     | 4773 VAC   |
| 774 | 18   | 19     | 27    | 48   | 10   | 11   | 20    | 61.5   | 3705.5 VAC |
| 775 | 19   | 22     | 28.5  | 47   | 11.5 | 13   | 18    | 123    | 1252 VAC   |
| 776 | 18   | 19     | 20    | 31   | 7    | 9    | 17.5  | 52.5   | 1034.5 VAC |
| 777 | 15   | 1950   | 21    | 23   | 7    | 8    | 17    | 12     | 10 GD7     |
| 778 | 27   | 31     | 33    | 31   | 10   | 10   | 18    | 78     | 24 NEG     |
| 779 | 20   | 25     | 111   | 31   | 11   | 9    | 19.5  | 66     | 14 NEG     |
| 780 | 16   | 19     | 22    | 32   | 12   | 815  | 19    | 90     | 13 PVM     |
| 781 | 16   | 20     | 30    | 24   | 13   | 11   | 19    | 8617   | 26 SEN     |
| 782 | 14   | 18.5   | 19    | 33   | 7    | 7    | 17    | 15     | 5559 VAC   |
| 783 | 1536 | 18     | 20    | 21   | 6    | 8    | 17    | 117    | 29 EDI     |
| 784 | 1226 | 26     | 27    | 39   | 11   | 13   | 21    | 148    | 37 EDI     |
| 785 | 678  | 28     | 32    | 61.5 | 10   | 14   | 25    | 121    | 42 EDI     |
| 786 | 618  | 25     | 31    | 58   | 12   | 14   | 24    | 125    | 24 EDI     |
| 787 | 474  | 16     | 23    | 46   | 8    | 8    | 17    | 62     | 12 EDI     |
| 788 | 19   | 1004.5 | 24    | 30   | 6    | 7    | 14    | 30     | 18 GD7     |
| 789 | 18   | 127    | 26    | 48   | 7    | 8    | 18    | 86     | 9 GD7      |
| 790 | 15.5 | 2036   | 21    | 25   | 7    | 9    | 17    | 12     | 9 GD7      |
| 791 | 18   | 23     | 228   | 48.5 | 15   | 9    | 21    | 107    | 28 MHV     |
| 792 | 17   | 25     | 212   | 45.5 | 9    | 10   | 18    | 49     | 12 MHV     |
| 793 | 20   | 19     | 247   | 25   | 12   | 12   | 17    | 20     | 14 MHV     |
| 794 | 14   | 17     | 562.5 | 19   | 9    | 11   | 19    | 21     | 13 MHV     |
| 795 | 17   | 21.5   | 133.5 | 42   | 10   | 11   | 18    | 111.5  | 13 NEG     |
| 796 | 21   | 22     | 126   | 46   | 11   | 10.5 | 19    | 110    | 13.5 NEG   |
| 797 | 18   | 274    | 36    | 132  | 8    | 9    | 27    | 12     | 16 GD7     |

|     |      |      |      |      |      |      |       |        |            |
|-----|------|------|------|------|------|------|-------|--------|------------|
| 798 | 36   | 77.5 | 37   | 69   | 185  | 14   | 288   | 27     | 16 REO     |
| 799 | 29   | 22   | 28   | 28   | 11   | 10   | 18    | 112    | 15 NEG     |
| 800 | 27   | 41   | 41   | 53.5 | 8    | 12   | 21    | 142    | 28 NEG     |
| 801 | 21   | 26   | 32   | 70   | 13   | 9    | 21    | 27     | 14 NEG     |
| 802 | 22   | 27   | 28   | 37   | 14   | 16   | 23    | 56     | 16 NEG     |
| 803 | 44   | 21   | 23   | 22   | 10   | 12   | 21    | 28     | 13 NEG     |
| 804 | 45   | 21   | 23   | 23   | 10   | 11   | 17    | 27     | 15 NEG     |
| 805 | 17   | 26   | 23   | 35   | 12   | 13   | 18    | 23     | 13 NEG     |
| 806 | 22   | 27   | 43   | 32   | 7    | 10   | 18    | 164    | 8 NEG      |
| 807 | 18   | 27   | 32   | 41   | 10   | 9    | 16    | 107    | 14 NEG     |
| 808 | 19.5 | 25   | 32   | 97.5 | 12   | 11   | 17    | 81     | 13.5 MVM   |
| 809 | 20   | 26.5 | 32   | 100  | 13   | 11.5 | 19    | 81.5   | 14 MVM     |
| 810 | 21   | 20   | 27   | 60   | 8    | 10.5 | 16.5  | 141    | 39 NEG     |
| 811 | 22.5 | 34   | 33   | 89   | 10   | 12   | 20    | 341.5  | 21 SEN     |
| 812 | 15   | 18   | 22   | 29   | 11   | 11   | 19    | 16     | 14 NEG     |
| 813 | 17   | 18   | 27   | 90   | 9    | 10   | 17    | 25.5   | 13 NEG     |
| 814 | 18   | 18   | 25   | 56   | 9    | 10   | 16    | 30     | 12 NEG     |
| 815 | 17   | 19   | 24   | 53   | 7    | 9    | 17    | 33     | 12 NEG     |
| 816 | 17   | 20   | 23.5 | 22   | 10.5 | 11   | 18    | 46     | 14 NEG     |
| 817 | 21   | 24   | 30   | 50   | 9    | 9    | 16    | 135    | 14 NEG     |
| 818 | 21   | 21   | 27   | 52   | 8    | 11   | 20    | 112    | 16 NEG     |
| 819 | 20.5 | 19   | 26   | 56   | 8    | 13   | 20    | 112    | 16 NEG     |
| 820 | 20   | 30   | 34   | 57   | 12   | 9    | 17    | 138    | 29 NEG     |
| 821 | 20   | 25   | 115  | 31   | 9    | 11   | 18    | 65     | 15 NEG     |
| 822 | 15.5 | 18.5 | 22   | 18.5 | 9    | 10   | 17    | 23     | 10 NEG     |
| 823 | 18   | 19   | 28   | 49   | 8    | 826  | 17    | 76     | 14 PVM     |
| 824 | 18.5 | 20   | 27   | 47   | 8    | 788  | 18    | 131    | 20 PVM     |
| 825 | 15   | 18.5 | 27   | 24   | 9    | 991  | 21.5  | 142    | 20 PVM     |
| 826 | 18   | 21   | 23   | 28   | 10   | 1313 | 19    | 60     | 14 PVM     |
| 827 | 21.5 | 23   | 26   | 41   | 9    | 1695 | 17    | 106    | 11 PVM     |
| 828 | 17   | 18   | 21   | 20   | 9    | 1960 | 18    | 15     | 10 PVM     |
| 829 | 17   | 19   | 21   | 34   | 12   | 785  | 20    | 91.5   | 15 PVM     |
| 830 | 14   | 18   | 19   | 17   | 5    | 1430 | 16    | 25     | 8 PVM      |
| 831 | 21   | 24   | 29   | 43   | 12   | 11   | 526   | 12     | 30 REO     |
| 832 | 20   | 18   | 22   | 33   | 11   | 15   | 647.5 | 66.5   | 9 REO      |
| 833 | 20   | 23   | 28   | 39   | 11   | 12   | 954.5 | 75.5   | 16 REO     |
| 834 | 15   | 16   | 20   | 19.5 | 6    | 7.5  | 16    | 5900.5 | 14 SEN     |
| 835 | 19   | 20   | 28   | 30   | 8    | 10   | 19    | 9905.5 | 27 SEN     |
| 836 | 18   | 21   | 25   | 30   | 9    | 10.5 | 19    | 10076  | 23 SEN     |
| 837 | 16   | 19   | 30   | 25   | 13   | 12   | 20    | 8843.5 | 26.5 SEN   |
| 838 | 18   | 20   | 20   | 31   | 7    | 10   | 17    | 22     | 4854 VAC   |
| 839 | 20   | 20   | 25   | 46   | 10   | 11   | 20    | 63     | 3488.5 VAC |
| 840 | 21   | 22   | 27   | 48   | 11   | 12   | 18    | 126    | 1166 VAC   |
| 841 | 22   | 17   | 20   | 21   | 7    | 10   | 18    | 22     | 6147 VAC   |
| 842 | 2491 | 19   | 39   | 33   | 10   | 12   | 18    | 29     | 36 EDI     |
| 843 | 1615 | 20   | 25   | 26   | 10   | 12   | 19    | 27     | 20 EDI     |
| 844 | 21   | 20   | 209  | 20   | 8.5  | 12   | 28    | 166    | 37 MHV     |

|     |        |        |       |      |      |      |      |        |          |
|-----|--------|--------|-------|------|------|------|------|--------|----------|
| 845 | 16     | 19     | 752   | 21   | 10.5 | 11   | 18   | 24     | 17 MHV   |
| 846 | 19     | 23     | 149.5 | 33.5 | 9    | 10   | 16   | 66     | 12 NEG   |
| 847 | 22     | 23     | 32    | 41.5 | 11   | 10   | 21   | 52     | 10 NEG   |
| 848 | 13     | 17     | 20    | 18   | 9    | 9    | 15   | 22     | 11 NEG   |
| 849 | 20     | 26     | 30    | 52   | 15   | 13   | 720  | 66     | 28 REO   |
| 850 | 21     | 50     | 36    | 56   | 6    | 9    | 18   | 105    | 3142 VAC |
| 851 | 38     | 34     | 33    | 39   | 7    | 9    | 18   | 15     | 5331 VAC |
| 852 | 1264   | 23     | 25    | 36   | 11   | 14   | 20   | 39     | 14 EDI   |
| 853 | 1346.5 | 19     | 179.5 | 34   | 9    | 10   | 21   | 14     | 15 EDI   |
| 854 | 1666.5 | 18     | 35    | 53   | 9    | 8    | 18.5 | 18     | 11 EDI   |
| 855 | 1736.5 | 19     | 34.5  | 57   | 8    | 10   | 17   | 19     | 10 EDI   |
| 856 | 2103.5 | 27     | 30    | 45   | 17   | 15   | 21.5 | 157    | 16.5 EDI |
| 857 | 1557   | 20     | 25.5  | 24   | 10   | 10   | 18   | 28.5   | 21 EDI   |
| 858 | 1397   | 24     | 27    | 44   | 15   | 14   | 21   | 100.5  | 18 EDI   |
| 859 | 937    | 20     | 22    | 31   | 8    | 10   | 21   | 21     | 13 EDI   |
| 860 | 1272   | 16     | 19    | 23   | 9    | 13   | 19   | 17     | 11 EDI   |
| 861 | 1279.5 | 16     | 18    | 23   | 10   | 13   | 16   | 18     | 10 EDI   |
| 862 | 18     | 1165.5 | 22    | 28   | 10   | 10   | 18   | 47     | 7 GD7    |
| 863 | 20     | 24     | 118   | 34   | 15.5 | 17.5 | 26.5 | 23     | 42 NEG   |
| 864 | 15     | 19     | 528   | 26   | 10   | 10.5 | 18   | 53     | 13 MHV   |
| 865 | 18     | 24     | 660   | 30   | 15   | 19.5 | 26   | 26     | 19 MHV   |
| 866 | 21     | 17     | 237   | 24   | 12   | 11.5 | 18   | 20     | 14 MHV   |
| 867 | 15     | 17     | 740   | 20   | 11   | 11   | 18   | 23     | 18 MHV   |
| 868 | 17     | 276    | 38    | 136  | 9    | 9    | 27   | 123    | 10 GD7   |
| 869 | 24     | 29     | 38    | 41   | 17   | 15   | 21   | 610.5  | 18 SEN   |
| 870 | 21     | 27     | 34    | 34   | 13   | 13   | 20   | 140    | 15 NEG   |
| 871 | 18     | 22     | 28    | 25   | 12   | 14   | 25   | 75     | 19 NEG   |
| 872 | 20     | 21.5   | 24    | 39   | 12   | 13   | 18   | 29     | 14 NEG   |
| 873 | 29     | 46     | 42    | 57   | 12   | 12   | 23   | 77     | 16 NEG   |
| 874 | 22     | 32     | 34    | 86   | 9    | 11   | 20   | 348    | 21 SEN   |
| 875 | 16     | 19     | 24    | 31   | 11   | 11   | 17.5 | 16     | 15 NEG   |
| 876 | 23     | 18     | 22    | 22   | 7    | 9    | 19   | 199    | 12 NEG   |
| 877 | 20     | 19     | 21    | 21   | 8    | 8    | 20   | 370    | 10 SEN   |
| 878 | 27     | 36     | 42    | 64   | 13   | 10.5 | 24   | 16     | 34 NEG   |
| 879 | 24     | 21     | 26    | 23   | 10   | 12   | 21.5 | 78     | 5 NEG    |
| 880 | 17     | 19     | 24    | 22.5 | 10   | 11   | 18   | 43.5   | 14 NEG   |
| 881 | 21     | 33     | 33.5  | 26   | 10   | 10   | 19   | 54     | 43 NEG   |
| 882 | 20     | 33     | 31.5  | 25   | 9    | 10   | 18   | 61     | 8 NEG    |
| 883 | 25     | 23     | 29    | 42   | 9    | 1144 | 22   | 47.5   | 13 PVM   |
| 884 | 17     | 18     | 22    | 20   | 9    | 1864 | 18   | 14     | 10 PVM   |
| 885 | 20.5   | 22.5   | 29.5  | 43   | 12   | 12   | 500  | 73     | 29 REO   |
| 886 | 21.5   | 20     | 24    | 39   | 9    | 9    | 684  | 147    | 42 REO   |
| 887 | 16.5   | 18     | 24    | 22   | 8    | 10   | 288  | 22     | 10 REO   |
| 888 | 17     | 18     | 21.5  | 19   | 8    | 10   | 303  | 21     | 9 REO    |
| 889 | 18     | 18     | 22    | 23   | 11   | 13   | 177  | 22     | 10 REO   |
| 890 | 22     | 19     | 28    | 29   | 8    | 10   | 19   | 8225.5 | 22 SEN   |
| 891 | 20     | 21     | 29.5  | 50   | 8    | 9    | 18   | 8075   | 19 SEN   |

|     |        |       |       |       |        |      |       |       |          |
|-----|--------|-------|-------|-------|--------|------|-------|-------|----------|
| 892 | 19     | 22    | 28    | 50    | 9      | 10   | 20    | 8445  | 20 SEN   |
| 893 | 22     | 52    | 38    | 57    | 8      | 10   | 19    | 110   | 3586 VAC |
| 894 | 22     | 20    | 19    | 25    | 7      | 9    | 18    | 23    | 6206 VAC |
| 895 | 2557   | 22    | 37    | 31    | 11     | 11   | 19    | 125   | 18 EDI   |
| 896 | 2078   | 24.5  | 28    | 47    | 16     | 14   | 22    | 165.5 | 15 EDI   |
| 897 | 18     | 264   | 21    | 27    | 9      | 10   | 17    | 18    | 11 GD7   |
| 898 | 62     | 35    | 31    | 111   | 1218.5 | 21   | 54    | 35    | 44 MYC   |
| 899 | 36     | 77.5  | 37    | 63    | 193.5  | 14   | 323.5 | 26    | 17 REO   |
| 900 | 23     | 24    | 27    | 38    | 16     | 967  | 22    | 177.5 | 18.5 PVM |
| 901 | 21     | 20    | 26    | 27    | 8      | 9    | 19    | 7937  | 20 SEN   |
| 902 | 23     | 26    | 22    | 38    | 10     | 11   | 18    | 17.5  | 7952 VAC |
| 903 | 1341.5 | 18    | 185   | 34    | 9      | 9    | 19    | 12    | 16 EDI   |
| 904 | 633    | 28    | 33    | 55    | 12     | 12   | 21    | 63    | 14 EDI   |
| 905 | 275.5  | 21    | 26    | 65    | 6      | 11   | 18    | 9     | 8 EDI    |
| 906 | 2629   | 20    | 25    | 35    | 10     | 13   | 23    | 15    | 13 EDI   |
| 907 | 2697   | 19    | 23    | 36    | 10     | 13   | 22    | 15    | 14 EDI   |
| 908 | 1355.5 | 25    | 26    | 44    | 12     | 15.5 | 22    | 104   | 19 EDI   |
| 909 | 2047   | 20    | 531   | 43    | 11     | 12   | 21    | 43    | 26 EDI   |
| 910 | 17     | 271.5 | 24    | 26    | 8      | 9    | 16    | 17    | 10 GD7   |
| 911 | 19     | 21    | 287.5 | 26    | 12     | 14   | 21    | 27    | 38 MHV   |
| 912 | 18     | 23    | 282   | 26    | 12     | 13   | 20    | 110   | 29 MHV   |
| 913 | 15     | 22    | 571   | 27    | 11     | 11   | 20    | 49    | 13 MHV   |
| 914 | 17     | 23    | 677   | 29    | 12     | 19.5 | 23.5  | 25    | 18 MHV   |
| 915 | 35     | 28.5  | 288   | 32.5  | 11     | 13   | 21    | 23    | 13 MHV   |
| 916 | 14     | 16    | 574   | 20    | 10     | 8.5  | 17    | 23    | 11 MHV   |
| 917 | 18     | 17    | 325.5 | 20    | 8      | 10   | 19    | 50    | 11 MHV   |
| 918 | 18     | 18    | 311   | 19    | 8      | 11   | 18    | 45    | 11 MHV   |
| 919 | 20.5   | 48.5  | 30.5  | 134   | 9      | 10   | 18    | 112   | 22 MVM   |
| 920 | 20     | 65    | 32    | 170   | 11     | 11   | 20    | 22    | 14.5 MVM |
| 921 | 18     | 59    | 30    | 152   | 12     | 10   | 21    | 21    | 13 MVM   |
| 922 | 18     | 191   | 33    | 251   | 9      | 9    | 25    | 38    | 11 MVM   |
| 923 | 53     | 128   | 29    | 304.5 | 10     | 17   | 27    | 22.5  | 21 MVM   |
| 924 | 61     | 34    | 32    | 107   | 1133   | 22   | 57    | 37    | 18 MYC   |
| 925 | 55.5   | 36.5  | 25    | 25    | 1701   | 33   | 35    | 21    | 17 MYC   |
| 926 | 23     | 27    | 35    | 38.5  | 13     | 12   | 22    | 137   | 14 NEG   |
| 927 | 14     | 20    | 21    | 18    | 35     | 11   | 18    | 30    | 10 NEG   |
| 928 | 18     | 24    | 25    | 24    | 12     | 11   | 23    | 13    | 19 NEG   |
| 929 | 21     | 32    | 34    | 33    | 9      | 9    | 18    | 13    | 12 NEG   |
| 930 | 21     | 30    | 30    | 29    | 8      | 10   | 18    | 13    | 10 NEG   |
| 931 | 16     | 27    | 23    | 35    | 12     | 12.5 | 19    | 24.5  | 12 NEG   |
| 932 | 17     | 24    | 28    | 25.5  | 9      | 12   | 16    | 13    | 12 NEG   |
| 933 | 29     | 46    | 43    | 57    | 10     | 10.5 | 22    | 67.5  | 16 NEG   |
| 934 | 26     | 27    | 33    | 47    | 12     | 14   | 21    | 116   | 42 NEG   |
| 935 | 19     | 19    | 35    | 32    | 10     | 12   | 21    | 62.5  | 18 NEG   |
| 936 | 29     | 40    | 45    | 63    | 14     | 14   | 26    | 13    | 21 NEG   |
| 937 | 22     | 23    | 27.5  | 36    | 14     | 1501 | 22    | 63    | 18 PVM   |
| 938 | 21     | 23    | 30    | 36    | 13     | 1438 | 21    | 59    | 19 PVM   |

|     |        |      |       |       |       |      |      |        |            |
|-----|--------|------|-------|-------|-------|------|------|--------|------------|
| 939 | 24     | 24   | 29    | 55    | 9     | 1555 | 22   | 38     | 12 PVM     |
| 940 | 23     | 24   | 27    | 40    | 15    | 969  | 20   | 179.5  | 17 PVM     |
| 941 | 20     | 23   | 29    | 42    | 12    | 14   | 943  | 74     | 16 REO     |
| 942 | 22.5   | 34   | 40    | 52    | 10    | 9    | 18   | 13264  | 25 SEN     |
| 943 | 15     | 16   | 19    | 19    | 7     | 7    | 15   | 5660.5 | 13 SEN     |
| 944 | 15     | 15.5 | 21    | 25    | 7     | 8    | 15   | 2755   | 11 SEN     |
| 945 | 31     | 29   | 31    | 60.5  | 14    | 14   | 21   | 79     | 4297 VAC   |
| 946 | 37     | 34   | 30.5  | 42    | 6     | 8    | 18   | 16     | 5272.5 VAC |
| 947 | 19     | 24   | 150   | 36    | 9     | 10   | 19   | 62     | 12 NEG     |
| 948 | 26     | 56.5 | 36    | 156   | 11    | 11   | 22   | 80     | 42 MVM     |
| 949 | 41     | 25   | 37    | 41    | 16    | 18   | 21   | 169    | 19 NEG     |
| 950 | 39     | 22.5 | 39    | 100   | 10    | 12   | 19.5 | 20.5   | 18 MVM     |
| 951 | 20     | 22   | 27    | 36    | 16    | 16   | 21   | 24     | 19 NEG     |
| 952 | 680    | 28   | 34    | 49    | 13    | 12   | 20   | 66     | 13 EDI     |
| 953 | 271    | 20   | 27    | 62    | 6     | 11   | 17   | 9      | 9 EDI      |
| 954 | 1644.5 | 30   | 34    | 55.5  | 14    | 17   | 23.5 | 316    | 18 EDI     |
| 955 | 3343   | 24   | 44.5  | 34    | 19.5  | 23.5 | 27   | 33     | 22 EDI     |
| 956 | 910    | 18   | 23    | 33    | 8     | 10   | 19   | 20     | 11 EDI     |
| 957 | 1694   | 21   | 33    | 25    | 18    | 15   | 24   | 45     | 15 EDI     |
| 958 | 1801   | 19   | 37    | 26    | 14.5  | 19   | 23   | 44     | 14 EDI     |
| 959 | 2004   | 19   | 538   | 46    | 13    | 10.5 | 20   | 44     | 29 EDI     |
| 960 | 21     | 23.5 | 121.5 | 31    | 16    | 18   | 25.5 | 19     | 41 NEG     |
| 961 | 22     | 212  | 35    | 257.5 | 10    | 11   | 31.5 | 38     | 12 MVM     |
| 962 | 67     | 45   | 30    | 53.5  | 837.5 | 24   | 41   | 62     | 14 MYC     |
| 963 | 64     | 45.5 | 29.5  | 50    | 740   | 23   | 38   | 23     | 18 MYC     |
| 964 | 71     | 37   | 34    | 48    | 246.5 | 24   | 46   | 100.5  | 56 MYC     |
| 965 | 68     | 36   | 35.5  | 43    | 232.5 | 23   | 52   | 92     | 56 MYC     |
| 966 | 24     | 30   | 36    | 44    | 16    | 17   | 22.5 | 651    | 18 SEN     |
| 967 | 18     | 43   | 24    | 26    | 11    | 14   | 17   | 31     | 15 NEG     |
| 968 | 18     | 43   | 26    | 25    | 11    | 12   | 21   | 30     | 16 NEG     |
| 969 | 18     | 26   | 30.5  | 28    | 9     | 10   | 18.5 | 15     | 12 NEG     |
| 970 | 28     | 28   | 33    | 100   | 17    | 19   | 26   | 320    | 22 SEN     |
| 971 | 33     | 20   | 21    | 24    | 14    | 30   | 19   | 20     | 9 NEG      |
| 972 | 17     | 21   | 31    | 31    | 10    | 10   | 19.5 | 18     | 17 NEG     |
| 973 | 40     | 21   | 38    | 102   | 10    | 12   | 20   | 20     | 16 MVM     |
| 974 | 22     | 22   | 25    | 45    | 11    | 13   | 22   | 33     | 15 NEG     |
| 975 | 21     | 21   | 25    | 41    | 10.5  | 14   | 20   | 33     | 16.5 NEG   |
| 976 | 19     | 21   | 24    | 21    | 9     | 8    | 20   | 376    | 10.5 SEN   |
| 977 | 21     | 31   | 42    | 35    | 12    | 12   | 23   | 30     | 16 NEG     |
| 978 | 23     | 26   | 29    | 47    | 14    | 15   | 306  | 54     | 18 REO     |
| 979 | 29     | 23   | 24    | 24    | 12    | 12   | 343  | 24     | 13 REO     |
| 980 | 33     | 30   | 31    | 62    | 14    | 14   | 21   | 81     | 4618 VAC   |
| 981 | 28     | 35   | 34    | 97    | 7     | 10   | 18   | 17     | 9151 VAC   |
| 982 | 24     | 31   | 32    | 90    | 8     | 11   | 17   | 15     | 8805 VAC   |
| 983 | 21     | 25   | 21    | 36    | 10    | 10   | 18   | 18     | 8367 VAC   |
| 984 | 20     | 18   | 33    | 30    | 12    | 12   | 20   | 58     | 22 NEG     |
| 985 | 21     | 29   | 32    | 48    | 13    | 14   | 20   | 22     | 15 NEG     |

|      |        |       |       |       |        |        |       |       |          |
|------|--------|-------|-------|-------|--------|--------|-------|-------|----------|
| 986  | 1581   | 29    | 31    | 56    | 15     | 17     | 25    | 312   | 16.5 EDI |
| 987  | 37     | 27    | 297   | 35    | 12     | 12     | 19    | 23    | 14 MHV   |
| 988  | 51     | 129   | 30    | 279   | 11     | 17     | 28    | 22    | 19 MVM   |
| 989  | 25     | 206   | 45.5  | 69    | 12     | 16     | 35    | 78    | 17 GD7   |
| 990  | 22     | 32    | 26    | 275   | 10     | 14     | 21    | 49    | 27 MVM   |
| 991  | 22     | 31    | 30    | 278.5 | 9      | 12     | 22    | 49    | 26 MVM   |
| 992  | 22     | 530   | 51    | 50    | 3523.5 | 10     | 42.5  | 18    | 18 MYC   |
| 993  | 53     | 36    | 26    | 26    | 1694   | 30     | 31    | 23    | 17 MYC   |
| 994  | 45     | 26    | 40    | 42    | 18     | 17     | 23    | 184   | 20 NEG   |
| 995  | 25     | 27    | 30.5  | 58    | 23     | 17     | 25    | 35    | 16 NEG   |
| 996  | 19.5   | 21    | 23    | 41    | 10     | 13     | 18    | 30.5  | 13 NEG   |
| 997  | 18     | 23    | 28    | 41    | 9      | 9      | 18    | 69    | 36 NEG   |
| 998  | 28     | 28    | 31    | 34    | 19     | 20     | 21    | 57    | 30 NEG   |
| 999  | 33     | 19    | 19.5  | 23    | 14     | 24     | 19    | 20    | 9 NEG    |
| 1000 | 20     | 30    | 41    | 34    | 11     | 13     | 22    | 29    | 15 NEG   |
| 1001 | 26.5   | 30    | 34    | 48    | 12     | 1430   | 23    | 112   | 15 PVM   |
| 1002 | 24     | 25    | 31    | 50    | 11     | 1553.5 | 20    | 35    | 12 PVM   |
| 1003 | 19     | 19    | 23    | 24    | 11     | 12     | 182   | 23    | 10 REO   |
| 1004 | 28     | 22    | 23    | 26    | 10     | 12     | 307   | 22    | 13 REO   |
| 1005 | 23     | 18    | 21    | 22    | 12     | 14.5   | 161   | 19    | 14 REO   |
| 1006 | 18.5   | 19    | 24    | 26    | 10     | 11     | 19    | 10573 | 31 SEN   |
| 1007 | 18     | 23    | 29    | 40    | 10     | 10     | 17    | 34    | 29 NEG   |
| 1008 | 189    | 24    | 31    | 27    | 19     | 32     | 23    | 102   | 20 EDI   |
| 1009 | 26     | 24    | 31    | 45.5  | 10     | 1157.5 | 22    | 46    | 13 PVM   |
| 1010 | 3156   | 23    | 41.5  | 31.5  | 19     | 18     | 26    | 33    | 22 EDI   |
| 1011 | 3385.5 | 22    | 32    | 26    | 11     | 13     | 20    | 27    | 11 EDI   |
| 1012 | 3497   | 24    | 34    | 27    | 15     | 17     | 20    | 27    | 13 EDI   |
| 1013 | 37     | 22    | 39    | 264.5 | 22     | 14     | 22    | 46    | 35 MVM   |
| 1014 | 26     | 23    | 32    | 31.5  | 19     | 21     | 21    | 89    | 6 NEG    |
| 1015 | 24.5   | 26    | 41    | 120   | 19     | 15     | 25    | 105   | 26 MVM   |
| 1016 | 22     | 26    | 39.5  | 122   | 20     | 13     | 23.5  | 98    | 27.5 MVM |
| 1017 | 24     | 32    | 33    | 50    | 14     | 13     | 23    | 22    | 18 NEG   |
| 1018 | 19     | 22    | 27    | 37    | 14.5   | 15     | 20    | 21    | 22 NEG   |
| 1019 | 25     | 26    | 30    | 43    | 16     | 17     | 300.5 | 55    | 20 REO   |
| 1020 | 18     | 19    | 24    | 26    | 10     | 11     | 21    | 10768 | 34.5 SEN |
| 1021 | 28     | 21.5  | 371.5 | 28    | 14     | 18     | 23    | 60    | 15 MHV   |
| 1022 | 24     | 186   | 45    | 68.5  | 12     | 15     | 31    | 74    | 18 GD7   |
| 1023 | 1761   | 24    | 26    | 35    | 12     | 17     | 27    | 20    | 15 EDI   |
| 1024 | 1721   | 25    | 24    | 35    | 12     | 15     | 26    | 18    | 15 EDI   |
| 1025 | 29     | 21    | 352   | 28    | 14     | 16     | 23.5  | 60.5  | 15 MHV   |
| 1026 | 35     | 427   | 54    | 53.5  | 801    | 15     | 39    | 147   | 6 MYC    |
| 1027 | 24     | 525.5 | 54    | 49    | 3591   | 11     | 40    | 19    | 18 MYC   |
| 1028 | 28.5   | 28    | 37    | 100   | 17     | 19     | 28    | 334   | 22 SEN   |
| 1029 | 22     | 29.5  | 46    | 97    | 27     | 17     | 24    | 61    | 31 MVM   |
| 1030 | 18     | 23    | 33.5  | 34    | 12     | 13     | 22    | 22    | 20 NEG   |
| 1031 | 34     | 33.5  | 39    | 43    | 15     | 31     | 24    | 88    | 20 NEG   |
| 1032 | 29.5   | 37    | 41    | 62    | 19     | 17     | 25    | 18    | 44 NEG   |

|      |       |       |        |       |        |        |      |       |           |
|------|-------|-------|--------|-------|--------|--------|------|-------|-----------|
| 1033 | 173   | 24    | 29     | 28    | 19     | 34     | 22   | 102   | 20 EDI    |
| 1034 | 26    | 28    | 33     | 48    | 13     | 1310.5 | 25   | 108   | 16 PVM    |
| 1035 | 527   | 52    | 45     | 86    | 42     | 32     | 29   | 96    | 36 EDI    |
| 1036 | 517   | 53    | 45     | 79.5  | 40.5   | 31     | 29   | 88    | 29 EDI    |
| 1037 | 24    | 353   | 43     | 214   | 11     | 12     | 30   | 132   | 34 GD7    |
| 1038 | 23    | 356   | 43     | 207   | 10     | 11.5   | 30.5 | 97    | 8 GD7     |
| 1039 | 38    | 24    | 39.5   | 275   | 23     | 14     | 21   | 50    | 32 MVM    |
| 1040 | 18    | 262   | 39     | 195   | 9      | 11     | 29.5 | 33    | 9 GD7     |
| 1041 | 35    | 457   | 55     | 58    | 841    | 14.5   | 44   | 129   | 16 MYC    |
| 1042 | 70    | 35    | 64     | 46    | 2741   | 29.5   | 29   | 52    | 54 MYC    |
| 1043 | 31.5  | 33    | 57.5   | 155   | 9      | 24     | 32   | 79    | 34 MVM    |
| 1044 | 22    | 28.5  | 44     | 98    | 26     | 14     | 23   | 56    | 36 MVM    |
| 1045 | 26    | 31    | 43     | 57.5  | 20     | 17     | 27.5 | 102   | 31 NEG    |
| 1046 | 3220  | 36    | 37     | 75    | 20     | 25     | 24   | 126   | 27 EDI    |
| 1047 | 3230  | 33    | 38     | 74.5  | 19     | 21     | 24   | 60    | 31 EDI    |
| 1048 | 19    | 254   | 36     | 196   | 9      | 11     | 28   | 37.5  | 10.5 GD7  |
| 1049 | 30    | 33    | 59.5   | 151.5 | 9      | 18     | 32   | 144   | 42 MVM    |
| 1050 | 31    | 406.5 | 44     | 76    | 13     | 17     | 76.5 | 82    | 13 GD7    |
| 1051 | 31    | 407   | 43     | 72    | 12     | 17     | 82   | 75    | 12 GD7    |
| 1052 | 27    | 33    | 45     | 60    | 21     | 18     | 28   | 99.5  | 30 NEG    |
| 1053 | 35    | 35    | 38     | 42    | 17.5   | 32     | 26.5 | 87    | 22 NEG    |
| 1054 | 35    | 35    | 55     | 78    | 27     | 20     | 30   | 115   | 40 NEG    |
| 1055 | 46    | 33    | 34     | 23.5  | 19     | 34     | 24   | 47    | 15.5 NEG  |
| 1056 | 31    | 24    | 31     | 36    | 16     | 18     | 26   | 47.5  | 24 NEG    |
| 1057 | 30    | 24.5  | 32     | 36    | 17.5   | 20     | 27   | 54    | 22.5 NEG  |
| 1058 | 43    | 395   | 41     | 232   | 12     | 12     | 36.5 | 127   | 17 GD7    |
| 1059 | 32    | 39    | 43     | 67    | 21     | 17     | 26   | 18    | 40 NEG    |
| 1060 | 78    | 37.5  | 63     | 48    | 2616   | 33     | 29   | 54    | 60 MYC    |
| 1061 | 33.5  | 34    | 47     | 56    | 28     | 21     | 29   | 83    | 36 NEG    |
| 1062 | 33    | 34    | 50     | 80    | 24     | 17     | 29   | 115   | 37 NEG    |
| 1063 | 48    | 34    | 40     | 26    | 21     | 36     | 27   | 50.5  | 18 NEG    |
| 1064 | 38    | 32    | 508    | 58    | 24     | 24     | 27   | 115   | 24 MHV    |
| 1065 | 30    | 33    | 36     | 48    | 22     | 25     | 25   | 46    | 22.5 NEG  |
| 1066 | 35.75 | 41.85 | 42.395 | 82.36 | 29.21  | 21.42  | 38   | 44.45 | 21.12 NEG |
| 1067 | 43    | 406   | 45     | 236   | 11     | 14     | 33   | 25    | 24 GD7    |
| 1068 | 97.5  | 492.5 | 72     | 193   | 1178   | 27.5   | 51   | 28.5  | 37 MYC    |
| 1069 | 84    | 540.5 | 53     | 60    | 2396   | 26     | 59   | 85    | 24 MYC    |
| 1070 | 81    | 528   | 53     | 60    | 2399   | 25     | 57   | 84    | 24 MYC    |
| 1071 | 27    | 35    | 72     | 135   | 33     | 15     | 30.5 | 123.5 | 49 MVM    |
| 1072 | 29    | 36    | 74     | 137   | 33.5   | 17     | 32   | 119   | 54.5 MVM  |
| 1073 | 32    | 33    | 35     | 49    | 20     | 26     | 28.5 | 45    | 21.5 NEG  |
| 1074 | 38    | 32    | 516    | 56    | 22     | 23     | 30   | 118   | 23 MHV    |
| 1075 | 36    | 516.5 | 61     | 97    | 15     | 21     | 60   | 80    | 19 GD7    |
| 1076 | 38    | 242   | 124    | 61    | 1905.5 | 20     | 35   | 22    | 30.5 MYC  |
| 1077 | 29    | 29    | 45     | 46    | 30     | 24     | 32   | 50    | 37 NEG    |
| 1078 | 32.5  | 330   | 44     | 207   | 14     | 16     | 29.5 | 95    | 10 GD7    |
| 1079 | 32    | 335.5 | 44     | 220   | 14     | 17     | 34.5 | 103   | 11.5 GD7  |



|      |      |        |       |       |        |      |       |       |      |     |
|------|------|--------|-------|-------|--------|------|-------|-------|------|-----|
| 1080 | 35   | 499    | 60    | 97    | 15     | 20.5 | 67    | 84    | 17   | GD7 |
| 1081 | 56   | 679    | 69    | 83    | 1184.5 | 24   | 66    | 105   | 30   | MYC |
| 1082 | 71   | 458.5  | 71    | 144   | 1533   | 35   | 810   | 112   | 73   | MYC |
| 1083 | 34   | 37.5   | 48.5  | 58.5  | 28     | 25   | 31    | 83.5  | 37   | NEG |
| 1084 | 28   | 29     | 44    | 44    | 30     | 27   | 30    | 49    | 38   | NEG |
| 1085 | 35   | 784    | 66    | 137   | 20     | 27   | 147   | 28    | 13   | GD7 |
| 1086 | 62   | 687.5  | 72    | 84.5  | 1292   | 26   | 69.5  | 77    | 32   | MYC |
| 1087 | 39   | 255.5  | 129   | 66    | 1912.5 | 19   | 38    | 25    | 30.5 | MYC |
| 1088 | 137  | 481.5  | 72    | 181   | 1190.5 | 41   | 53    | 31.5  | 34.5 | MYC |
| 1089 | 71   | 466    | 71    | 145   | 1526   | 32   | 776.5 | 114   | 77.5 | MYC |
| 1090 | 34   | 789    | 65    | 145.5 | 19     | 28   | 146.5 | 28    | 16   | GD7 |
| 1091 | 35   | 811    | 127   | 78    | 2511   | 15   | 82.5  | 25    | 42   | MYC |
| 1092 | 51   | 244    | 59    | 85    | 15     | 22   | 43.5  | 123   | 34   | GD7 |
| 1093 | 40   | 586    | 70    | 220.5 | 24     | 27   | 57    | 282   | 28   | GD7 |
| 1094 | 36.5 | 786    | 121   | 80    | 2407   | 16   | 71    | 24    | 45   | MYC |
| 1095 | 38   | 550.5  | 68    | 225.5 | 24     | 28   | 53    | 294   | 25   | GD7 |
| 1096 | 30   | 1063   | 86    | 104   | 15     | 24   | 76    | 97    | 10   | GD7 |
| 1097 | 48   | 225    | 58    | 78    | 15     | 23   | 36    | 34    | 33   | GD7 |
| 1098 | 57.5 | 69.5   | 101   | 179.5 | 20     | 32   | 34    | 259   | 83.5 | SEN |
| 1099 | 30   | 943.5  | 128   | 100   | 1722   | 17   | 87.5  | 28    | 26   | MYC |
| 1100 | 69   | 180.5  | 90.5  | 93    | 2184   | 50   | 81.5  | 111.5 | 95   | MYC |
| 1101 | 48   | 38     | 58    | 453.5 | 31     | 32   | 38    | 38    | 36   | MVM |
| 1102 | 67   | 200.5  | 90    | 88    | 1892.5 | 41   | 86    | 106   | 88.5 | MYC |
| 1103 | 56   | 74     | 107   | 175.5 | 19     | 41   | 38    | 266.5 | 80   | SEN |
| 1104 | 123  | 540    | 106   | 310.5 | 1708.5 | 44   | 553   | 227.5 | 89   | MYC |
| 1105 | 33   | 961    | 135   | 101   | 1666   | 14.5 | 91    | 87    | 14   | MYC |
| 1106 | 117  | 541    | 106   | 304.5 | 1830   | 45   | 538   | 221   | 82.5 | MYC |
| 1107 | 61   | 52.5   | 111.5 | 241   | 65     | 54   | 70    | 149   | 79.5 | MVM |
| 1108 | 46   | 38     | 62    | 426   | 30     | 35   | 37    | 38    | 37   | MVM |
| 1109 | 30   | 1068   | 85    | 106   | 16     | 25   | 83    | 147   | 44   | GD7 |
| 1110 | 101  | 985    | 115   | 173   | 1406   | 46   | 122   | 153   | 24   | MYC |
| 1111 | 101  | 992    | 116   | 165   | 1402   | 46   | 118   | 147   | 43   | MYC |
| 1112 | 42   | 1185   | 161   | 107.5 | 2133   | 27   | 89    | 16    | 39   | MYC |
| 1113 | 61   | 50     | 108   | 243   | 60     | 54.5 | 86    | 149.5 | 77   | MVM |
| 1114 | 39   | 1171   | 161   | 98    | 2028   | 22   | 90.5  | 26    | 33   | MYC |
| 1115 | 86   | 1759.5 | 127.5 | 138.5 | 218    | 32   | 128   | 52    | 27   | GD7 |
| 1116 | 77.5 | 1757.5 | 126   | 139   | 246    | 34.5 | 131   | 51.5  | 28   | GD7 |
| 1117 | 26.5 | 1502   | 177   | 126   | 2039   | 17   | 103   | 30    | 4    | MYC |
| 1118 | 84   | 1269   | 117   | 218   | 298.5  | 32   | 284.5 | 168   | 60   | GD7 |
| 1119 | 35   | 1616   | 180   | 144   | 2168.5 | 17   | 110   | 30    | 41   | MYC |
| 1120 | 79   | 1241   | 117   | 218.5 | 298    | 31   | 296   | 156   | 59   | GD7 |
| 1121 | 72.5 | 2143   | 227.5 | 201   | 4223.5 | 30   | 166   | 110.5 | 73   | MYC |
| 1122 | 48   | 1871   | 274   | 185   | 960.5  | 32   | 128   | 157   | 21   | GD7 |
| 1123 | 26   | 2160   | 154   | 160   | 2667   | 19   | 153   | 101   | 23   | MYC |
| 1124 | 75   | 2103   | 217   | 199   | 4036.5 | 30   | 154.5 | 103   | 71   | MYC |
| 1125 | 27   | 2237   | 157   | 161.5 | 2700   | 19   | 163   | 94    | 26   | MYC |
| 1126 | 60   | 1610   | 197   | 149   | 2866.5 | 27   | 119   | 46    | 53.5 | MYC |

|      |       |        |       |       |        |       |        |       |           |
|------|-------|--------|-------|-------|--------|-------|--------|-------|-----------|
| 1127 | 44    | 1930   | 211.5 | 169   | 1958   | 26    | 147    | 163   | 35 MYC    |
| 1128 | 50    | 1914.5 | 268   | 190.5 | 977    | 32    | 136    | 47    | 11 GD7    |
| 1129 | 58    | 1625   | 207   | 144   | 2943.5 | 27    | 127    | 44    | 53 MYC    |
| 1130 | 47.5  | 1868.5 | 213   | 173   | 2060   | 26    | 140.5  | 104   | 13 MYC    |
| 1131 | 67    | 1866   | 120   | 173   | 38     | 51    | 148.5  | 76    | 27 GD7    |
| 1132 | 142   | 500    | 92    | 132   | 65.5   | 116   | 86.5   | 284.5 | 25 GD7    |
| 1133 | 160   | 1916   | 168   | 250   | 1337   | 62    | 199    | 164   | 54 GD7    |
| 1134 | 170.5 | 1972   | 174   | 261.5 | 1430.5 | 64    | 188    | 163   | 57.5 GD7  |
| 1135 | 23    | 2435   | 240   | 187.5 | 1163.5 | 17    | 159    | 51    | 33 GD7    |
| 1136 | 157   | 553.5  | 99    | 135   | 79     | 103.5 | 91     | 309.5 | 28 GD7    |
| 1137 | 25.5  | 2588   | 266   | 206   | 1243.5 | 18    | 164    | 107   | 27 GD7    |
| 1138 | 265   | 2400   | 165   | 331   | 3085   | 81    | 1370   | 110.5 | 77.5 MYC  |
| 1139 | 51    | 3111   | 196.5 | 234   | 173    | 34    | 233    | 84    | 14 GD7    |
| 1140 | 240   | 2474   | 180   | 365   | 3221   | 70    | 1533   | 122   | 81 MYC    |
| 1141 | 46    | 2988   | 249   | 252   | 273    | 24    | 201    | 81    | 75.5 GD7  |
| 1142 | 53    | 3367.5 | 218.5 | 269   | 191.5  | 38    | 233    | 86    | 23 GD7    |
| 1143 | 62    | 2659   | 253   | 277   | 1498.5 | 47    | 218    | 215   | 119.5 GD7 |
| 1144 | 57    | 2107   | 408   | 217   | 1282   | 25    | 170    | 83    | 108.5 GD7 |
| 1145 | 50    | 3057.5 | 261   | 273.5 | 293.5  | 26    | 198.5  | 82    | 85.5 GD7  |
| 1146 | 84    | 3135.5 | 341   | 304   | 976    | 49    | 447.5  | 138   | 57 GD7    |
| 1147 | 84    | 3294.5 | 322   | 303.5 | 898    | 49    | 366    | 143.5 | 60.5 GD7  |
| 1148 | 68    | 2804   | 260   | 276.5 | 1511   | 46    | 218    | 199.5 | 100.5 GD7 |
| 1149 | 59    | 2197   | 415.5 | 241   | 1413   | 27    | 193.5  | 106   | 107 GD7   |
| 1150 | 99    | 3908   | 322   | 399   | 151    | 61    | 1437.5 | 198   | 41 GD7    |
| 1151 | 115   | 3660.5 | 268   | 365   | 3643   | 44    | 369.5  | 120   | 48 GD7    |
| 1152 | 113.5 | 3837   | 288.5 | 360   | 3874.5 | 40    | 380.5  | 121   | 49 MYC    |
| 1153 | 107   | 4145   | 277   | 357   | 908    | 74    | 454    | 266   | 117 GD7   |
| 1154 | 88    | 3673.5 | 311.5 | 408   | 152    | 57    | 1285   | 187   | 42 GD7    |
| 1155 | 114   | 4229.5 | 278   | 367.5 | 918.5  | 74    | 599    | 261   | 119.5 GD7 |
| 1156 | 62    | 52     | 417   | 434   | 28     | 108   | 50.5   | 91    | 15 MVM    |
| 1157 | 62    | 51     | 394   | 447   | 32.5   | 113.5 | 49     | 154   | 20 MVM    |
| 1158 | 392   | 4244   | 701   | 907   | 1581   | 223   | 3431   | 230.5 | 313.5 GD7 |
| 1159 | 368   | 4248   | 714   | 892   | 1854   | 215   | 3364.5 | 242   | 328 GD7   |
| 1160 | 359   | 6092.5 | 702.5 | 686   | 938.5  | 407   | 888    | 521.5 | 173 GD7   |
| 1161 | 367   | 6403.5 | 711   | 705.5 | 915    | 425   | 938    | 492   | 195 GD7   |

**Table S3: Testing Set**

| Test | EDI | GD7 | MHV  | MMV | MYC  | PVM | REO | ECTRO | SEN |     |
|------|-----|-----|------|-----|------|-----|-----|-------|-----|-----|
| 1    | 3   | 3   | 3    | 3   | 2    | 3   | 6   | 1     | 2   | 3   |
| 2    | 5   | 1   | 3    | 2   | 2    | 1   | 3   | 6     | 3   | 1   |
| 3    | 3   | 3   | 1    | 2   | 4    | 4   | 4   | 1     | 2   | 3   |
| 4    | 4   | 1   | 7    | 4   | 5    | 4   | 3   | 4     | 4   | 2   |
| 5    | 3   | 2   | 3    | 7   | 3    | 1   | 1   | 4     | 4   | 3   |
| 6    | 4   | 3   | 2    | 4   | 7    | 2   | 4   | 5     | 5   | 5   |
| 7    | 4   | 2   | 2    | 4   | 5    | 0   | 5   | 4     | 4   | 7   |
| 8    | 7   | 3   | 2    | 3   | 6    | 3   | 5   | 4     | 4   | 3   |
| 9    | 5   | 7   | 1    | 5   | 7    | 4   | 6   | 5     | 5   | 4   |
| 10   | 2   | 3   | 1    | 4   | 3    | 6   | 7   | 3     | 3   | 6   |
| 11   | 4   | 4   | 4    | 4   | 1    | 5   | 7   | 1     | 1   | 6   |
| 12   | 2   | 4   | 5    | 5   | 5    | 6   | 8   | 5     | 5   | 6   |
| 13   | 0   | 4   | 2    | 2   | 3    | 6   | 3   | 6     | 3   | 3   |
| 14   | 6   | 5   | 2    | 4   | 5    | 1   | 2   | 3     | 3   | 3   |
| 15   | 2   | 1   | 1    | 2   | 4    | 1   | 5   | 4     | 4   | 2   |
| 16   | 4   | 1   | 3    | 3   | 1    | 2   | 2   | 2     | 2   | 1   |
| 17   | 9   | 5   | 9    | 11  | 6    | 4   | 4   | 8     | 8   | 5   |
| 18   | 0   | 2   | 3    | 1   | 6    | 7   | 0   | 3     | 3   | 3   |
| 19   | 4   | 3   | 3    | 4   | 2    | 5   | 4   | 4     | 4   | 10  |
| 20   | 15  | 16  | 10   | 4   | 16   | 3   | 3   | 11    | 3   | 3   |
| 21   | 13  | 19  | 12   | 5   | 23.5 | 3   | 2   | 12    | 3   | 3   |
| 22   | 8   | 8   | 8    | 6   | 4    | 3   | 10  | 5     | 2   | 2   |
| 23   | 19  | 31  | 17   | 13  | 22   | 4   | 10  | 15.5  | 13  | 13  |
| 24   | 16  | 21  | 12   | 5   | 23   | 4   | 3   | 14    | 3   | 3   |
| 25   | 17  | 18  | 11   | 5   | 21   | 3   | 3   | 14    | 3   | 3   |
| 26   | 19  | 24  | 13   | 4   | 25   | 4   | 3   | 14    | 4   | 4   |
| 27   | 12  | 17  | 10   | 3   | 18.5 | 3   | 2   | 10    | 2   | 2   |
| 28   | 25  | 28  | 17   | 5   | 31   | 4   | 3   | 17    | 5   | 5   |
| 29   | 21  | 25  | 15   | 5   | 29.5 | 3   | 4   | 16    | 4.5 | 4.5 |
| 30   | 18  | 21  | 14   | 5   | 23   | 4   | 2.5 | 12    | 3   | 3   |
| 31   | 4   | 3   | 3    | 3   | 3    | 1   | 2   | 4     | 1   | 1   |
| 32   | 4   | 4   | 3    | 3   | 3.5  | 1   | 2   | 4     | 1   | 1   |
| 33   | 6   | 8.5 | 6    | 3   | 7    | 2   | 3   | 7     | 1   | 1   |
| 34   | 7   | 9   | 5    | 4   | 8    | 3   | 5   | 6     | 2   | 2   |
| 35   | 3   | 4   | 3.5  | 3   | 5    | 1   | 2   | 5     | 0   | 0   |
| 36   | 6   | 6   | 4    | 3   | 5    | 2   | 3   | 6     | 1   | 1   |
| 37   | 4   | 5   | 4    | 3   | 4    | 1   | 2   | 4     | 1   | 1   |
| 38   | 4   | 5   | 3    | 4   | 4    | 1   | 2   | 5     | 1   | 1   |
| 39   | 3   | 3   | 2    | 3   | 2    | 1   | 2   | 5     | 1   | 1   |
| 40   | 14  | 15  | 11   | 4   | 18   | 3   | 3   | 11    | 3   | 3   |
| 41   | 14  | 15  | 11   | 4   | 18   | 3   | 3   | 11    | 3   | 3   |
| 42   | 14  | 15  | 11   | 4   | 17   | 3   | 2   | 11    | 4   | 4   |
| 43   | 13  | 16  | 11.5 | 3   | 18   | 3   | 2   | 11    | 3   | 3   |
| 44   | 15  | 18  | 12   | 4   | 22   | 3   | 2   | 11    | 3   | 3   |
| 45   | 31  | 30  | 19   | 6   | 35   | 4   | 4   | 18    | 6   | 6   |

|    |      |      |    |     |      |      |     |     |     |
|----|------|------|----|-----|------|------|-----|-----|-----|
| 46 | 16.5 | 31   | 17 | 17  | 23   | 10.5 | 7   | 13  | 9.5 |
| 47 | 14   | 18   | 12 | 4   | 22   | 4    | 2   | 12  | 3   |
| 48 | 14   | 19   | 11 | 6   | 20   | 4    | 6   | 11  | 3   |
| 49 | 16   | 20   | 13 | 10  | 21   | 4    | 5   | 13  | 4   |
| 50 | 23   | 27   | 16 | 5   | 32   | 4    | 3   | 17  | 4.5 |
| 51 | 25   | 28.5 | 17 | 7   | 32   | 4    | 5.5 | 15  | 5   |
| 52 | 15   | 19   | 14 | 5   | 23   | 4    | 5   | 13  | 4   |
| 53 | 26   | 29   | 19 | 6   | 33   | 5    | 4   | 18  | 5   |
| 54 | 10   | 6    | 7  | 7   | 6    | 4    | 2   | 6   | 6   |
| 55 | 17   | 21   | 12 | 5   | 23.5 | 4    | 4   | 11  | 4   |
| 56 | 20   | 22   | 15 | 5   | 26   | 4    | 6   | 14  | 4   |
| 57 | 16   | 16   | 11 | 5   | 17   | 3.5  | 4.5 | 11  | 3   |
| 58 | 15   | 17   | 11 | 6   | 20   | 4    | 5   | 12  | 5.5 |
| 59 | 16   | 19   | 14 | 5   | 22.5 | 4    | 3   | 12  | 3   |
| 60 | 17   | 22   | 13 | 6   | 23   | 3    | 6   | 13  | 4   |
| 61 | 5    | 5    | 3  | 5.5 | 4    | 4    | 2   | 4   | 2   |
| 62 | 18   | 23   | 15 | 5   | 24   | 3    | 3   | 13  | 4   |
| 63 | 5    | 5    | 3  | 4   | 4    | 2    | 8   | 5   | 1   |
| 64 | 8    | 5    | 4  | 5   | 7    | 2    | 3   | 6   | 2   |
| 65 | 6    | 6    | 4  | 3   | 5    | 2    | 2   | 5   | 1   |
| 66 | 7    | 7    | 5  | 6   | 6    | 3    | 4   | 5.5 | 3   |
| 67 | 8    | 7    | 6  | 6   | 7    | 3    | 4.5 | 4   | 4   |
| 68 | 5    | 7    | 3  | 19  | 4    | 4    | 9   | 5   | 6.5 |
| 69 | 7    | 9    | 3  | 29  | 4    | 3    | 2   | 4   | 2   |
| 70 | 5    | 5    | 4  | 3   | 4    | 2    | 3   | 6   | 0   |
| 71 | 3.5  | 4    | 3  | 4   | 3    | 2    | 4   | 4   | 1   |
| 72 | 22   | 27.5 | 17 | 4.5 | 34   | 5    | 4   | 15  | 5   |
| 73 | 22   | 27   | 17 | 7   | 32   | 5    | 5   | 15  | 7   |
| 74 | 18   | 19   | 14 | 6   | 24   | 6    | 5   | 10  | 22  |
| 75 | 16   | 17   | 12 | 4   | 20   | 4    | 2   | 13  | 3   |
| 76 | 15   | 19   | 12 | 6   | 22   | 4    | 4   | 12  | 5   |
| 77 | 17   | 20.5 | 13 | 6   | 22   | 3    | 4   | 12  | 4   |
| 78 | 15   | 17   | 11 | 5   | 20   | 3    | 3   | 10  | 4   |
| 79 | 15   | 17   | 11 | 5   | 20   | 3    | 3   | 10  | 4   |
| 80 | 22   | 26   | 16 | 6   | 27   | 5    | 3   | 15  | 5   |
| 81 | 16   | 20   | 14 | 4   | 22   | 4    | 3   | 14  | 3   |
| 82 | 19   | 22.5 | 15 | 8   | 26   | 4    | 4   | 15  | 5.5 |
| 83 | 16   | 20   | 14 | 4   | 22   | 4    | 3   | 14  | 3   |
| 84 | 19   | 22.5 | 15 | 8   | 26   | 4    | 4   | 15  | 5.5 |
| 85 | 25.5 | 32   | 17 | 5   | 35   | 5    | 4   | 19  | 5   |
| 86 | 14   | 19   | 11 | 4   | 20   | 3    | 3   | 12  | 3   |
| 87 | 25   | 34   | 21 | 5   | 38   | 4    | 3   | 18  | 6   |
| 88 | 17   | 20   | 13 | 8   | 22   | 4    | 6   | 12  | 6   |
| 89 | 17   | 19   | 12 | 5   | 20   | 3    | 3   | 12  | 4   |
| 90 | 17   | 20   | 13 | 6   | 20   | 5    | 3   | 11  | 5   |
| 91 | 15   | 18   | 12 | 5   | 20   | 5    | 2   | 10  | 6   |
| 92 | 16   | 18   | 12 | 5   | 20   | 4    | 2   | 11  | 8   |

|     |      |      |      |      |      |     |     |      |     |
|-----|------|------|------|------|------|-----|-----|------|-----|
| 93  | 16   | 20   | 12   | 6    | 24.5 | 4   | 3   | 12   | 4   |
| 94  | 26   | 29   | 18   | 6    | 35   | 4.5 | 4   | 17   | 5   |
| 95  | 23.5 | 43   | 36.5 | 17.5 | 60   | 13  | 5   | 16   | 8   |
| 96  | 29   | 36   | 21   | 6    | 37   | 5   | 3   | 19   | 6   |
| 97  | 18   | 21   | 15   | 8    | 24   | 4   | 5   | 13   | 6   |
| 98  | 18   | 14   | 12   | 6    | 21   | 4   | 5   | 10   | 7   |
| 99  | 18   | 20   | 15   | 8    | 26   | 4   | 5   | 12   | 6   |
| 100 | 21   | 25   | 16   | 5    | 31   | 5   | 3   | 16   | 4   |
| 101 | 17.5 | 20   | 12   | 12   | 25   | 5   | 4   | 11   | 10  |
| 102 | 21   | 25   | 15   | 28   | 25   | 7.5 | 9   | 12.5 | 8   |
| 103 | 10   | 3    | 9    | 5    | 8    | 12  | 11  | 4    | 11  |
| 104 | 27   | 30.5 | 18   | 7    | 36   | 5   | 6   | 17   | 6   |
| 105 | 28   | 29   | 17   | 4    | 38   | 4   | 3   | 18   | 5   |
| 106 | 26   | 32   | 18   | 7    | 36   | 4   | 6   | 19   | 5   |
| 107 | 25   | 27   | 17   | 5    | 35.5 | 4.5 | 4   | 17   | 5   |
| 108 | 19   | 21   | 24   | 10   | 26   | 5   | 5   | 14   | 5   |
| 109 | 21   | 28.5 | 14   | 56.5 | 26   | 7   | 5   | 12   | 6   |
| 110 | 20   | 24   | 16   | 7    | 30   | 4   | 6   | 14   | 6   |
| 111 | 18   | 19   | 13   | 7    | 23.5 | 5   | 3   | 12   | 6   |
| 112 | 22   | 21   | 15   | 10   | 26   | 6   | 7   | 14   | 6   |
| 113 | 21   | 19   | 12   | 9    | 24   | 5   | 5   | 13   | 6   |
| 114 | 18   | 19   | 13   | 11   | 23   | 9.5 | 5   | 12   | 5.5 |
| 115 | 17   | 20   | 14   | 7    | 21   | 5   | 3   | 12   | 4   |
| 116 | 17   | 21.5 | 13   | 5    | 23   | 5   | 3   | 13   | 4.5 |
| 117 | 17   | 21   | 14   | 7    | 25.5 | 4   | 5   | 12   | 4   |
| 118 | 18   | 19   | 14   | 7.5  | 25   | 5   | 5   | 13   | 5   |
| 119 | 7    | 5    | 10   | 8    | 6    | 5   | 5   | 6    | 2   |
| 120 | 10   | 6    | 9    | 6    | 4    | 6.5 | 4   | 5    | 2   |
| 121 | 30   | 33   | 21   | 6    | 40.5 | 5   | 4   | 20   | 6   |
| 122 | 18   | 22   | 14   | 6    | 26   | 5   | 6   | 15   | 5   |
| 123 | 8.5  | 13.5 | 7    | 19   | 10   | 4   | 5   | 5    | 5   |
| 124 | 9    | 7.5  | 6    | 10   | 7    | 3   | 6   | 6    | 4   |
| 125 | 8    | 7.5  | 9    | 16   | 7    | 4   | 38  | 6    | 8   |
| 126 | 6    | 5    | 3    | 4    | 5    | 3   | 3   | 4    | 2   |
| 127 | 8    | 6    | 5    | 9    | 8    | 4   | 5   | 5.5  | 5   |
| 128 | 8    | 6    | 5    | 9    | 6    | 4   | 5   | 7    | 3   |
| 129 | 26   | 29   | 18   | 8    | 34   | 6   | 6   | 16   | 8   |
| 130 | 17   | 18   | 12   | 10   | 22   | 6   | 4   | 12   | 5   |
| 131 | 13.5 | 17   | 11.5 | 6    | 19   | 3   | 3.5 | 11   | 5   |
| 132 | 13.5 | 17   | 11.5 | 6    | 19   | 3   | 3.5 | 11   | 5   |
| 133 | 37   | 33   | 19   | 6.5  | 38   | 6   | 5   | 18   | 10  |
| 134 | 21   | 23   | 16   | 6    | 26   | 5   | 4   | 14   | 6   |
| 135 | 19.5 | 24   | 15   | 7    | 28   | 8   | 4   | 15   | 6   |
| 136 | 27   | 33   | 21   | 6    | 34   | 5   | 4   | 20   | 5   |
| 137 | 27   | 33   | 21   | 6    | 34   | 5   | 4   | 20   | 5   |
| 138 | 14   | 19   | 13   | 6    | 22   | 4   | 4   | 12   | 4   |
| 139 | 14   | 19   | 13   | 6    | 22   | 4   | 4   | 12   | 4   |

|     |      |      |      |      |      |     |      |      |     |
|-----|------|------|------|------|------|-----|------|------|-----|
| 140 | 19   | 22   | 13   | 10   | 25   | 4.5 | 5.5  | 14   | 7   |
| 141 | 21   | 21   | 13   | 10   | 25   | 4   | 5    | 14   | 6   |
| 142 | 17   | 19.5 | 12   | 6    | 22   | 4   | 3    | 12   | 5   |
| 143 | 19   | 20   | 13   | 9    | 22   | 4   | 3    | 12   | 6   |
| 144 | 17   | 18   | 13   | 5    | 22   | 5   | 4    | 12   | 5   |
| 145 | 16   | 19   | 13   | 5    | 22   | 4   | 3    | 12   | 3   |
| 146 | 16   | 18   | 12   | 6    | 21   | 5   | 3.5  | 11   | 4   |
| 147 | 14.5 | 17   | 13   | 5    | 21   | 4   | 3    | 12   | 4   |
| 148 | 23.5 | 30   | 17   | 5    | 33   | 4   | 3    | 18   | 5   |
| 149 | 20   | 24.5 | 18   | 11   | 29   | 9   | 4    | 13   | 11  |
| 150 | 17   | 22   | 15   | 7    | 28   | 5   | 3.5  | 13   | 4   |
| 151 | 19   | 23   | 14   | 8    | 26   | 4   | 5.5  | 14   | 4   |
| 152 | 18   | 23   | 20   | 11   | 25   | 6   | 4    | 12   | 5   |
| 153 | 18   | 18   | 12   | 9    | 22   | 5   | 4    | 13   | 6   |
| 154 | 14   | 19   | 16   | 9    | 21.5 | 4   | 6.5  | 12   | 4   |
| 155 | 18.5 | 19   | 15   | 6    | 23   | 5   | 4    | 13   | 5   |
| 156 | 17   | 22   | 14   | 11   | 26   | 4   | 5    | 13   | 7   |
| 157 | 22   | 28   | 19.5 | 6    | 36   | 5   | 4    | 17   | 5   |
| 158 | 21   | 26   | 14   | 15   | 26   | 6   | 5    | 12   | 6   |
| 159 | 22   | 27   | 18   | 12   | 33   | 6   | 6    | 16   | 9   |
| 160 | 21   | 28   | 16   | 11   | 32.5 | 6   | 6    | 17   | 7   |
| 161 | 17   | 20   | 13   | 24   | 23   | 7   | 4    | 12   | 5   |
| 162 | 17   | 28   | 14   | 34   | 26   | 6   | 34   | 12.5 | 13  |
| 163 | 22.5 | 21   | 13   | 13   | 23   | 6   | 25.5 | 12   | 6   |
| 164 | 15   | 23   | 14   | 14   | 28   | 9   | 9    | 11   | 6   |
| 165 | 24   | 24.5 | 17   | 9    | 31   | 5   | 6    | 16   | 6   |
| 166 | 24   | 24   | 17   | 8    | 30   | 6   | 9    | 16.5 | 7   |
| 167 | 20.5 | 21.5 | 16   | 11   | 26   | 7   | 6.5  | 14   | 7   |
| 168 | 40   | 19   | 12   | 15.5 | 23   | 7   | 7    | 12   | 5.5 |
| 169 | 19   | 20   | 14   | 16   | 22.5 | 5   | 5    | 12   | 7.5 |
| 170 | 28   | 31   | 20   | 13   | 36.5 | 8   | 8    | 18.5 | 10  |
| 171 | 22   | 25   | 16   | 28   | 34   | 8   | 18   | 13   | 7   |
| 172 | 20   | 22   | 15   | 15   | 29   | 7   | 6.5  | 13   | 7   |
| 173 | 30   | 28   | 18   | 14   | 34   | 6   | 7    | 16   | 9   |
| 174 | 30   | 23   | 13.5 | 11   | 25   | 5   | 8    | 13   | 6.5 |
| 175 | 21   | 21   | 16   | 11   | 26   | 6   | 6    | 13   | 8   |
| 176 | 18   | 20   | 14   | 10   | 23   | 5   | 5    | 11   | 6   |
| 177 | 26   | 26   | 18   | 11   | 33   | 6   | 6    | 16   | 9   |
| 178 | 21   | 21   | 29.5 | 11   | 24   | 9   | 4    | 13   | 5   |
| 179 | 19   | 23.5 | 17   | 12   | 26   | 6   | 5    | 13.5 | 7   |
| 180 | 20   | 23   | 28   | 9    | 26   | 5   | 4    | 14   | 4   |
| 181 | 18.5 | 21   | 16   | 11   | 23   | 9   | 5    | 13   | 5   |
| 182 | 27   | 22   | 15   | 11   | 32   | 12  | 6    | 13   | 6   |
| 183 | 20   | 23   | 15.5 | 11.5 | 23   | 5   | 5    | 13   | 6   |
| 184 | 18   | 18   | 23   | 13   | 24.5 | 5   | 4    | 11   | 7   |
| 185 | 20   | 19   | 14   | 11   | 24   | 5   | 7    | 13   | 8   |
| 186 | 21   | 20   | 17   | 22   | 17   | 6   | 5    | 11   | 7   |

|     |      |      |      |      |      |     |     |      |      |
|-----|------|------|------|------|------|-----|-----|------|------|
| 187 | 27   | 31   | 20   | 9    | 37   | 6.5 | 5   | 17   | 7    |
| 188 | 24   | 27   | 16   | 16   | 29.5 | 6   | 4   | 14   | 7    |
| 189 | 22   | 22   | 18   | 7    | 27   | 6   | 4   | 12   | 5    |
| 190 | 36   | 38   | 26   | 7    | 46   | 7   | 6   | 25   | 7    |
| 191 | 20   | 22   | 15   | 11   | 27   | 6   | 6   | 14.5 | 8    |
| 192 | 19   | 20   | 13   | 6    | 25   | 5   | 3   | 15   | 4.5  |
| 193 | 8    | 6    | 5    | 9    | 6    | 3   | 5   | 6    | 4    |
| 194 | 6    | 7    | 25   | 11   | 4.5  | 3   | 4   | 5    | 2    |
| 195 | 9.5  | 6    | 11   | 9    | 5    | 4   | 3.5 | 6    | 4    |
| 196 | 22   | 25.5 | 17   | 17   | 48   | 15  | 12  | 17   | 8    |
| 197 | 25   | 23.5 | 17   | 13   | 36   | 15  | 6   | 16   | 10   |
| 198 | 9    | 9    | 6    | 12   | 8    | 4   | 4   | 6    | 4    |
| 199 | 8    | 9    | 7    | 18   | 9    | 5   | 4   | 7    | 5    |
| 200 | 10   | 7    | 7    | 11   | 9    | 5   | 7   | 6    | 5    |
| 201 | 7    | 6    | 6    | 9    | 6    | 9   | 4   | 4.5  | 32   |
| 202 | 8    | 7    | 9    | 19   | 6    | 4   | 3   | 5    | 4    |
| 203 | 7    | 4    | 4    | 10   | 4    | 4   | 4   | 4    | 39.5 |
| 204 | 9    | 6    | 33   | 8    | 7    | 3   | 5   | 5    | 4    |
| 205 | 6    | 7    | 5    | 11.5 | 5    | 4   | 3   | 5    | 3.5  |
| 206 | 6.5  | 6    | 3.5  | 16   | 8    | 5   | 3   | 4    | 9    |
| 207 | 17   | 21   | 13   | 11   | 22   | 9   | 4   | 13   | 10   |
| 208 | 18.5 | 20   | 11   | 11   | 20   | 6   | 4   | 10.5 | 17   |
| 209 | 42   | 37   | 21   | 12   | 37   | 7   | 8   | 20   | 13   |
| 210 | 39.5 | 36   | 20   | 12   | 39   | 8   | 8   | 21   | 13   |
| 211 | 35.5 | 38   | 24   | 10   | 43   | 7   | 8   | 20   | 10   |
| 212 | 19   | 18   | 13.5 | 6    | 23   | 5   | 4.5 | 11   | 8    |
| 213 | 22   | 29   | 18   | 9.5  | 32   | 5   | 6   | 16   | 7    |
| 214 | 25   | 31   | 18   | 10   | 33   | 5   | 5   | 16   | 7    |
| 215 | 22   | 29   | 18   | 9.5  | 32   | 5   | 6   | 16   | 7    |
| 216 | 25   | 31   | 18   | 10   | 33   | 5   | 5   | 16   | 7    |
| 217 | 24   | 30   | 20   | 11   | 35.5 | 6   | 6   | 16   | 7    |
| 218 | 18   | 20   | 14   | 7    | 25   | 4   | 6   | 13   | 6    |
| 219 | 26   | 30.5 | 19   | 11   | 34   | 5   | 7   | 18   | 8    |
| 220 | 20   | 23   | 16   | 11   | 26   | 5   | 6   | 16   | 8    |
| 221 | 16   | 21.5 | 14   | 10   | 22   | 5   | 4   | 12   | 5    |
| 222 | 19   | 21   | 11   | 8    | 23   | 5   | 4   | 11   | 6    |
| 223 | 18   | 20   | 14   | 7    | 21   | 5   | 4   | 11   | 4    |
| 224 | 18   | 21   | 12   | 8    | 21.5 | 5   | 3   | 11   | 5    |
| 225 | 18   | 19   | 11   | 7    | 24   | 5   | 3   | 11   | 5.5  |
| 226 | 19   | 20   | 14   | 10.5 | 19   | 5   | 3   | 12   | 9    |
| 227 | 19   | 20   | 12   | 7    | 22   | 5   | 3   | 12   | 4    |
| 228 | 24   | 26   | 14   | 9    | 28   | 6   | 4   | 15   | 9    |
| 229 | 21   | 29   | 17   | 22   | 28.5 | 5   | 4   | 14   | 9    |
| 230 | 21   | 26   | 17   | 13   | 28   | 6   | 4   | 14   | 6    |
| 231 | 22   | 25   | 15   | 9    | 88   | 9   | 5   | 15   | 6    |
| 232 | 24   | 26   | 17   | 17   | 32   | 8   | 5   | 14   | 8    |
| 233 | 23   | 26   | 17   | 20   | 32   | 12  | 5   | 16   | 9    |

|     |      |      |      |      |      |     |     |      |      |
|-----|------|------|------|------|------|-----|-----|------|------|
| 234 | 21   | 23.5 | 16   | 10   | 26.5 | 8   | 5   | 15   | 6    |
| 235 | 23   | 25   | 16   | 11   | 32   | 10  | 6   | 15   | 7    |
| 236 | 17   | 19   | 13   | 7    | 20   | 4   | 4   | 12   | 5    |
| 237 | 21   | 19   | 13   | 17   | 21.5 | 8   | 5   | 12.5 | 8    |
| 238 | 60   | 59   | 208  | 64.5 | 95   | 32  | 96  | 209  | 140  |
| 239 | 20   | 21.5 | 13   | 12.5 | 27   | 6   | 4   | 13   | 6    |
| 240 | 21   | 26   | 15   | 15   | 25   | 5   | 10  | 13   | 19   |
| 241 | 20.5 | 21   | 14   | 31   | 28   | 7   | 4   | 12   | 13   |
| 242 | 18   | 19   | 13   | 11   | 23   | 5   | 5   | 12   | 6    |
| 243 | 21   | 22   | 15   | 11   | 28.5 | 6   | 7   | 15   | 7    |
| 244 | 17.5 | 22   | 15   | 16   | 23   | 8   | 5   | 14   | 7    |
| 245 | 19   | 19   | 13   | 11   | 23   | 6   | 4   | 12   | 5    |
| 246 | 26.5 | 31   | 17   | 17   | 36   | 9   | 9   | 16   | 13   |
| 247 | 35   | 31   | 21   | 16   | 38   | 8   | 9.5 | 19   | 14   |
| 248 | 23   | 26   | 18   | 12   | 25.5 | 8   | 7   | 20   | 6.5  |
| 249 | 23   | 24.5 | 14   | 13   | 28.5 | 11  | 7   | 13   | 11   |
| 250 | 27   | 19   | 13   | 11   | 22   | 6   | 7   | 12   | 6    |
| 251 | 20.5 | 19   | 14   | 9    | 21   | 8   | 7   | 17   | 6    |
| 252 | 26   | 26   | 19   | 10   | 33   | 8   | 7   | 17   | 8    |
| 253 | 25   | 23   | 17   | 17   | 30   | 7   | 5   | 15   | 8    |
| 254 | 25.5 | 25   | 22   | 9    | 30   | 6.5 | 5   | 16   | 6    |
| 255 | 22   | 23   | 60   | 16   | 29   | 7   | 4   | 15   | 8    |
| 256 | 21   | 24.5 | 14   | 12   | 27   | 6   | 9   | 15   | 6.5  |
| 257 | 20   | 20   | 15   | 15   | 68.5 | 5   | 4   | 12   | 10   |
| 258 | 22   | 21   | 13   | 9    | 24   | 5.5 | 4   | 12   | 13   |
| 259 | 28   | 29   | 20   | 10   | 36   | 8   | 8   | 16.5 | 9    |
| 260 | 21   | 22   | 14   | 8    | 26   | 5   | 4   | 13.5 | 11   |
| 261 | 22   | 27   | 14   | 9    | 67   | 9   | 5   | 14   | 6    |
| 262 | 26   | 22   | 16   | 18   | 28   | 10  | 7   | 13   | 14   |
| 263 | 24   | 22   | 16   | 24   | 32.5 | 13  | 16  | 12   | 11.5 |
| 264 | 23   | 21   | 15   | 14.5 | 29   | 12  | 9   | 13   | 6    |
| 265 | 24   | 26   | 14   | 13.5 | 22.5 | 14  | 7   | 12   | 7    |
| 266 | 18.5 | 21   | 12   | 13   | 20   | 6   | 4   | 11   | 30   |
| 267 | 10   | 7    | 6    | 9    | 7    | 3   | 5   | 6    | 4    |
| 268 | 8    | 5    | 5    | 6    | 4    | 3   | 4   | 5    | 3    |
| 269 | 23   | 24   | 17   | 21.5 | 38   | 7   | 5   | 15   | 7    |
| 270 | 21.5 | 27   | 18   | 13.5 | 31   | 7   | 8   | 16   | 10   |
| 271 | 21   | 22.5 | 14.5 | 14   | 26   | 6   | 5   | 20   | 23.5 |
| 272 | 12   | 12   | 10   | 15   | 10   | 5   | 6   | 8    | 3    |
| 273 | 9    | 11   | 6    | 13   | 9    | 4.5 | 5   | 7    | 3    |
| 274 | 9    | 11   | 6    | 15   | 8    | 5   | 4   | 8.5  | 5    |
| 275 | 10   | 6    | 4    | 16   | 6    | 8   | 6   | 6    | 7    |
| 276 | 6    | 6    | 5    | 12   | 5    | 6.5 | 4   | 5    | 4    |
| 277 | 7    | 7    | 5    | 11   | 5    | 4   | 5   | 5    | 4    |
| 278 | 8    | 9    | 6    | 9    | 9    | 4   | 6   | 7    | 4    |
| 279 | 9    | 8    | 5    | 11   | 10   | 8   | 5   | 6    | 3    |
| 280 | 11   | 9.5  | 6.5  | 18   | 8    | 9   | 13  | 5    | 58.5 |



|     |      |      |      |      |      |      |    |      |      |
|-----|------|------|------|------|------|------|----|------|------|
| 281 | 15   | 17   | 13   | 23   | 7    | 17   | 12 | 6    | 8    |
| 282 | 8    | 7    | 5    | 19   | 8    | 8    | 3  | 18.5 | 6    |
| 283 | 20   | 20   | 15   | 11   | 23   | 9    | 6  | 13   | 50.5 |
| 284 | 20   | 19.5 | 13   | 24   | 26   | 6    | 5  | 11   | 14   |
| 285 | 19   | 17   | 13   | 11   | 21.5 | 6    | 5  | 12   | 5    |
| 286 | 17   | 17   | 11   | 4    | 16   | 4    | 3  | 10   | 4    |
| 287 | 17   | 17   | 11   | 4    | 16   | 4    | 3  | 10   | 4    |
| 288 | 23   | 28   | 20   | 10   | 31.5 | 7    | 7  | 16.5 | 8    |
| 289 | 19.5 | 23   | 15   | 11   | 26   | 12   | 8  | 12   | 7    |
| 290 | 27   | 29   | 16   | 39   | 69   | 47.5 | 7  | 17   | 19   |
| 291 | 22   | 31   | 19   | 31.5 | 28   | 7    | 5  | 14   | 20   |
| 292 | 24   | 25.5 | 17   | 15.5 | 29.5 | 15   | 4  | 15   | 9    |
| 293 | 22   | 31   | 19   | 31.5 | 28   | 7    | 5  | 14   | 20   |
| 294 | 24   | 25.5 | 17   | 15.5 | 29.5 | 15   | 4  | 15   | 9    |
| 295 | 26   | 31.5 | 20   | 9    | 38   | 6.5  | 8  | 19   | 11   |
| 296 | 19   | 20   | 16   | 12   | 21.5 | 7    | 3  | 12   | 11   |
| 297 | 29   | 28   | 15   | 9    | 27   | 9    | 8  | 14   | 7    |
| 298 | 20   | 21.5 | 20   | 9    | 22   | 7    | 4  | 13   | 7    |
| 299 | 21   | 23.5 | 22   | 15   | 24   | 5    | 5  | 12   | 6    |
| 300 | 20   | 22   | 13   | 12   | 25   | 7    | 5  | 15   | 7    |
| 301 | 20   | 20   | 12   | 8    | 19   | 5    | 3  | 11   | 4.5  |
| 302 | 20   | 19   | 14   | 9    | 21   | 5.5  | 4  | 11   | 9    |
| 303 | 19   | 20   | 12   | 8    | 21   | 7    | 3  | 11   | 4    |
| 304 | 19   | 18.5 | 13   | 10   | 21   | 7    | 3  | 12   | 7    |
| 305 | 22   | 20   | 15   | 6    | 22   | 5    | 7  | 11.5 | 6    |
| 306 | 23   | 26   | 19   | 14   | 30   | 9    | 5  | 14   | 10   |
| 307 | 21   | 24   | 17   | 10   | 34   | 7    | 4  | 15.5 | 7    |
| 308 | 22   | 26   | 16   | 10   | 26   | 12   | 7  | 14   | 10   |
| 309 | 18.5 | 21   | 13   | 6    | 25   | 5    | 3  | 13   | 7    |
| 310 | 21.5 | 23   | 16   | 16   | 26   | 8    | 8  | 14   | 9    |
| 311 | 18   | 20   | 13   | 8    | 19   | 5    | 4  | 11   | 6    |
| 312 | 21   | 20   | 13   | 8    | 21   | 7    | 5  | 13   | 6    |
| 313 | 14   | 18   | 14   | 12   | 16   | 6    | 19 | 7    | 4    |
| 314 | 25   | 33   | 20.5 | 10   | 37   | 7    | 7  | 20   | 8    |
| 315 | 21   | 24   | 15   | 19   | 27   | 7    | 5  | 39.5 | 7    |
| 316 | 37   | 37   | 23   | 13   | 43   | 10   | 9  | 21   | 12   |
| 317 | 8    | 7.5  | 5    | 10   | 10   | 5    | 7  | 5    | 4    |
| 318 | 24   | 22   | 14.5 | 26.5 | 30   | 8    | 11 | 13   | 14   |
| 319 | 23   | 27   | 16   | 13   | 23   | 22   | 8  | 12   | 12   |
| 320 | 19   | 23   | 15   | 6    | 27   | 6    | 4  | 14   | 5    |
| 321 | 18   | 23   | 15   | 9    | 26   | 5    | 4  | 12   | 7    |
| 322 | 20   | 21   | 14   | 9    | 24   | 7    | 4  | 13   | 7    |
| 323 | 21.5 | 22.5 | 14   | 14   | 29   | 6    | 5  | 12.5 | 8    |
| 324 | 21   | 24.5 | 16   | 19   | 34   | 7    | 5  | 13.5 | 6    |
| 325 | 23   | 22   | 13   | 12   | 26   | 7    | 6  | 11.5 | 11   |
| 326 | 22   | 23   | 15.5 | 14   | 27   | 9    | 5  | 13   | 11   |
| 327 | 21   | 27.5 | 17   | 15   | 29   | 7    | 5  | 14   | 11   |

|     |      |      |    |    |      |      |      |       |      |
|-----|------|------|----|----|------|------|------|-------|------|
| 328 | 21   | 24   | 16 | 20 | 27.5 | 6    | 6    | 13    | 6    |
| 329 | 20   | 16   | 11 | 11 | 21.5 | 4.5  | 4    | 10    | 5    |
| 330 | 19   | 25   | 13 | 29 | 24   | 4.5  | 5    | 13    | 13   |
| 331 | 31   | 30   | 20 | 16 | 38.5 | 8    | 9    | 18    | 11   |
| 332 | 25   | 24   | 17 | 10 | 28.5 | 6    | 10   | 16    | 5    |
| 333 | 21   | 27.5 | 23 | 13 | 25   | 10   | 25   | 12    | 7    |
| 334 | 30   | 34   | 21 | 15 | 42   | 7    | 11   | 20    | 12   |
| 335 | 29   | 44   | 22 | 92 | 40   | 8    | 44   | 16    | 8    |
| 336 | 28   | 30   | 18 | 10 | 34.5 | 7.5  | 5    | 17    | 9    |
| 337 | 38   | 31   | 16 | 52 | 27.5 | 11   | 29.5 | 12    | 16   |
| 338 | 28   | 27   | 19 | 19 | 29   | 7    | 6    | 15    | 8    |
| 339 | 22   | 23   | 15 | 9  | 28   | 20   | 5    | 15.5  | 9    |
| 340 | 23.5 | 24   | 16 | 13 | 30   | 17   | 31   | 15    | 10   |
| 341 | 21   | 20   | 14 | 10 | 27   | 5    | 4    | 13    | 8.5  |
| 342 | 18   | 17   | 18 | 15 | 30   | 10   | 6    | 13    | 6    |
| 343 | 24.5 | 30   | 29 | 19 | 29   | 11   | 15   | 15    | 24   |
| 344 | 25   | 35   | 14 | 11 | 39.5 | 8    | 9    | 13    | 5    |
| 345 | 21   | 22.5 | 15 | 11 | 33   | 6    | 13   | 12    | 10   |
| 346 | 17   | 16   | 11 | 10 | 21   | 7    | 8    | 11    | 12   |
| 347 | 25   | 24   | 17 | 12 | 29   | 7    | 5    | 16    | 7    |
| 348 | 33   | 37   | 25 | 13 | 44   | 7    | 10   | 22    | 11   |
| 349 | 43   | 22   | 12 | 24 | 22   | 9    | 11   | 12    | 11   |
| 350 | 7    | 8    | 6  | 42 | 6    | 4    | 3    | 125.5 | 5    |
| 351 | 28   | 24   | 18 | 25 | 31   | 8    | 4    | 15    | 8    |
| 352 | 26   | 26   | 17 | 23 | 56   | 8    | 10   | 15    | 10   |
| 353 | 31   | 31   | 21 | 17 | 32.5 | 10   | 7    | 15    | 11   |
| 354 | 20.5 | 24   | 15 | 21 | 26.5 | 6    | 5    | 14    | 13   |
| 355 | 11   | 6    | 5  | 9  | 23   | 9    | 3    | 5     | 4    |
| 356 | 9    | 5.5  | 5  | 12 | 9    | 5    | 4    | 5     | 7    |
| 357 | 8.5  | 8    | 5  | 17 | 56   | 6    | 5    | 6     | 24.5 |
| 358 | 11   | 8    | 7  | 23 | 9    | 26   | 5    | 6     | 15   |
| 359 | 8    | 8    | 5  | 13 | 9    | 5    | 8    | 5     | 4    |
| 360 | 7    | 6    | 4  | 11 | 6    | 3.5  | 3    | 4     | 4    |
| 361 | 21   | 20.5 | 16 | 7  | 24   | 6    | 4    | 13    | 9    |
| 362 | 20   | 22   | 14 | 8  | 26   | 7    | 4    | 13    | 14   |
| 363 | 20   | 20   | 12 | 10 | 23   | 8    | 4.5  | 13    | 11   |
| 364 | 17   | 17   | 12 | 5  | 20   | 5    | 3    | 11    | 5    |
| 365 | 16   | 21   | 13 | 29 | 21   | 5    | 6    | 11    | 13   |
| 366 | 19.5 | 18   | 20 | 21 | 20   | 13   | 166  | 12    | 28   |
| 367 | 16   | 21   | 13 | 29 | 21   | 5    | 6    | 11    | 13   |
| 368 | 19.5 | 18   | 20 | 21 | 20   | 13   | 166  | 12    | 28   |
| 369 | 27   | 22   | 18 | 14 | 30   | 7    | 4    | 14    | 15   |
| 370 | 25   | 26   | 15 | 16 | 28   | 7    | 4    | 14    | 13   |
| 371 | 25   | 26   | 15 | 16 | 28   | 7    | 4    | 14    | 13   |
| 372 | 46   | 23   | 14 | 9  | 24   | 8    | 4    | 13    | 12   |
| 373 | 23.5 | 20   | 14 | 12 | 24   | 9    | 5    | 12    | 8    |
| 374 | 21   | 23   | 17 | 11 | 50   | 14.5 | 6    | 12    | 6    |

|     |      |      |      |      |      |      |      |      |      |
|-----|------|------|------|------|------|------|------|------|------|
| 375 | 28   | 24.5 | 15   | 12   | 25.5 | 12   | 7    | 13   | 9    |
| 376 | 25   | 20   | 11   | 10   | 20   | 9    | 3    | 11   | 6    |
| 377 | 25   | 26   | 20   | 15   | 32   | 10   | 5    | 15   | 17.5 |
| 378 | 32   | 84   | 21   | 69   | 29   | 25.5 | 15.5 | 15.5 | 10   |
| 379 | 23   | 24   | 17   | 11   | 28.5 | 10   | 7    | 15   | 6    |
| 380 | 43   | 25   | 16   | 10   | 24   | 8    | 6    | 16   | 6    |
| 381 | 21   | 24   | 15   | 26   | 26   | 6    | 4    | 14   | 6    |
| 382 | 23   | 24   | 14   | 9    | 26   | 8    | 4    | 14   | 10   |
| 383 | 25   | 20.5 | 18   | 13   | 27   | 7    | 4    | 13.5 | 9    |
| 384 | 21   | 21   | 14   | 11   | 24   | 6    | 4    | 12   | 7    |
| 385 | 20   | 22   | 14   | 16   | 22.5 | 6    | 5    | 13   | 7.5  |
| 386 | 15   | 19.5 | 12.5 | 7    | 22   | 5    | 4    | 12   | 5    |
| 387 | 19   | 20   | 13   | 7    | 21   | 6    | 3    | 12   | 6    |
| 388 | 19   | 21   | 13   | 30   | 23   | 8    | 14.5 | 10.5 | 14   |
| 389 | 12   | 7    | 5    | 11   | 7    | 7    | 4    | 5    | 9    |
| 390 | 11   | 7    | 5    | 11.5 | 11   | 5    | 5    | 5    | 12   |
| 391 | 10   | 7    | 6    | 8    | 6    | 6    | 5    | 5    | 6    |
| 392 | 21   | 20   | 13   | 9    | 22   | 7.5  | 4    | 13   | 6    |
| 393 | 26   | 32.5 | 19   | 26   | 36.5 | 9.5  | 5    | 16   | 10   |
| 394 | 19   | 19   | 13   | 25   | 22   | 11   | 5    | 11   | 21   |
| 395 | 21   | 29   | 15   | 34   | 29   | 8    | 7    | 12.5 | 12   |
| 396 | 19   | 24   | 14   | 30   | 25.5 | 6    | 5    | 13   | 16   |
| 397 | 18.5 | 19   | 12   | 12   | 33.5 | 31.5 | 12   | 11   | 26   |
| 398 | 24   | 24   | 17   | 9    | 36   | 7    | 12   | 14   | 7    |
| 399 | 22   | 24   | 17   | 15   | 30   | 6    | 5    | 14   | 13   |
| 400 | 24   | 26.5 | 17   | 10   | 36   | 11.5 | 5    | 15   | 9    |
| 401 | 26   | 28   | 17   | 14   | 34.5 | 30   | 9.5  | 17   | 11.5 |
| 402 | 24   | 32   | 41   | 44   | 28   | 11   | 13   | 13.5 | 12   |
| 403 | 23   | 33   | 102  | 40   | 28   | 11   | 10   | 13   | 13   |
| 404 | 20   | 25   | 14   | 14   | 22   | 6    | 9    | 11.5 | 6    |
| 405 | 19   | 19   | 12   | 8    | 20.5 | 10   | 6    | 11   | 8    |
| 406 | 20   | 18   | 13   | 14   | 20   | 6    | 4    | 11   | 5    |
| 407 | 43   | 28   | 18   | 14   | 30   | 9.5  | 8    | 16   | 13   |
| 408 | 24   | 25   | 16   | 13   | 31   | 11   | 8    | 15   | 7    |
| 409 | 25   | 24.5 | 16   | 14.5 | 26.5 | 9    | 10   | 14   | 8    |
| 410 | 22   | 24   | 13   | 9    | 25   | 7    | 4    | 13   | 7    |
| 411 | 20   | 19.5 | 13   | 25   | 25   | 7    | 6    | 11   | 9    |
| 412 | 30   | 33   | 19   | 23   | 36   | 12   | 20   | 16   | 10.5 |
| 413 | 28   | 34.5 | 20   | 13   | 29   | 9    | 16   | 16.5 | 9    |
| 414 | 24   | 29   | 16   | 76   | 33   | 9    | 6    | 14   | 10   |
| 415 | 33   | 38   | 23   | 10   | 45   | 8    | 7    | 19   | 9    |
| 416 | 21.5 | 22   | 12   | 17   | 22   | 8    | 6    | 11   | 11   |
| 417 | 27   | 23   | 14   | 16   | 24   | 8    | 4    | 12   | 19   |
| 418 | 23   | 33   | 16   | 74   | 224  | 11   | 7    | 15   | 48.5 |
| 419 | 23   | 20   | 15   | 12   | 27   | 9    | 4    | 13   | 7    |
| 420 | 21   | 21   | 41   | 12   | 22   | 5.5  | 5    | 11   | 6.5  |
| 421 | 26   | 25   | 17   | 22.5 | 25   | 9    | 5    | 18   | 27   |

|     |       |      |      |       |      |      |       |        |       |
|-----|-------|------|------|-------|------|------|-------|--------|-------|
| 422 | 267.5 | 232  | 940  | 284.5 | 436  | 154  | 496.5 | 1175.5 | 699.5 |
| 423 | 18    | 11   | 10   | 22    | 11   | 15   | 15    | 7      | 10    |
| 424 | 12    | 10   | 6    | 22    | 7    | 7    | 5     | 7      | 8     |
| 425 | 25.5  | 29   | 18   | 24    | 29   | 8.5  | 6     | 13     | 13    |
| 426 | 24    | 23   | 18   | 18    | 1306 | 23   | 5     | 42     | 18    |
| 427 | 32    | 34   | 18.5 | 139.5 | 32   | 19.5 | 59.5  | 17     | 13    |
| 428 | 26    | 24   | 15   | 16    | 25   | 7    | 6     | 15     | 17    |
| 429 | 19    | 17   | 13   | 20    | 20   | 8    | 15    | 10     | 15    |
| 430 | 10    | 10   | 4.5  | 25    | 13   | 6    | 4     | 4      | 30.5  |
| 431 | 13    | 11   | 8    | 14    | 13   | 6    | 10    | 8      | 8     |
| 432 | 13    | 8    | 7    | 17    | 16   | 6    | 11    | 6      | 55    |
| 433 | 10    | 12   | 6    | 12    | 8    | 7    | 7     | 5      | 4     |
| 434 | 16    | 14   | 10   | 16.5  | 11   | 13   | 8     | 8      | 27.5  |
| 435 | 19    | 8    | 6    | 16    | 7    | 12   | 14    | 5      | 4     |
| 436 | 14    | 10   | 8    | 30    | 325  | 14   | 16    | 7      | 17    |
| 437 | 28    | 22   | 15   | 19.5  | 25   | 9    | 6     | 15     | 8     |
| 438 | 19    | 21   | 14   | 8     | 142  | 8    | 6     | 12     | 16    |
| 439 | 27    | 22   | 16   | 10    | 27   | 12   | 4.5   | 13.5   | 11    |
| 440 | 27    | 28   | 18   | 14    | 32   | 7    | 4     | 16     | 7     |
| 441 | 27    | 28   | 17   | 16    | 30   | 8    | 4.5   | 16     | 7     |
| 442 | 22    | 26   | 16   | 17    | 27   | 7    | 5     | 14     | 12    |
| 443 | 27    | 28   | 18   | 14    | 32   | 7    | 4     | 16     | 7     |
| 444 | 27    | 28   | 17   | 16    | 30   | 8    | 4.5   | 16     | 7     |
| 445 | 22    | 26   | 16   | 17    | 27   | 7    | 5     | 14     | 12    |
| 446 | 20    | 22   | 13   | 11    | 25   | 6    | 4     | 12     | 15    |
| 447 | 20    | 22   | 13   | 11    | 25   | 6    | 4     | 12     | 15    |
| 448 | 17    | 21   | 13   | 14    | 99   | 8    | 6     | 12     | 12    |
| 449 | 21    | 21   | 14   | 14    | 22   | 8    | 3     | 12     | 6     |
| 450 | 22    | 25   | 16   | 12    | 26   | 8    | 5     | 14     | 7     |
| 451 | 22    | 23   | 23.5 | 9     | 26.5 | 10   | 4     | 14     | 13    |
| 452 | 23    | 24   | 18   | 15    | 26.5 | 11.5 | 5     | 14.5   | 18    |
| 453 | 24.5  | 27   | 17   | 31    | 25   | 9    | 13    | 12     | 34.5  |
| 454 | 20    | 21   | 13   | 11    | 64.5 | 6    | 6     | 12     | 8     |
| 455 | 19    | 24   | 15   | 16    | 25   | 6    | 28    | 13     | 14    |
| 456 | 20    | 21   | 13   | 8     | 22   | 9    | 5     | 13     | 7     |
| 457 | 20    | 20   | 12   | 11    | 23.5 | 7    | 3     | 11     | 7     |
| 458 | 22    | 20   | 13   | 10    | 20.5 | 6    | 4     | 12     | 7     |
| 459 | 24    | 19   | 16   | 13    | 26   | 10   | 7     | 13     | 6     |
| 460 | 27    | 27   | 18   | 13    | 31   | 9    | 7     | 16     | 10    |
| 461 | 26    | 24   | 17   | 31    | 29   | 6.5  | 6     | 16     | 8     |
| 462 | 26    | 41   | 20   | 43    | 28.5 | 7    | 68    | 16     | 8     |
| 463 | 28    | 26   | 18   | 16.5  | 28   | 21   | 6     | 15     | 9     |
| 464 | 23    | 22   | 15   | 10.5  | 21.5 | 10   | 4     | 12.5   | 7     |
| 465 | 19    | 20   | 14   | 7     | 22   | 6    | 3     | 12     | 6     |
| 466 | 23    | 20   | 14   | 12    | 24   | 7    | 6     | 12     | 7     |
| 467 | 25    | 22   | 15   | 9     | 25   | 7    | 5     | 14     | 9     |
| 468 | 24    | 20.5 | 14.5 | 13    | 25   | 9    | 6     | 12     | 12    |

|     |      |      |      |      |       |      |      |       |      |
|-----|------|------|------|------|-------|------|------|-------|------|
| 469 | 29   | 28   | 17   | 24   | 30    | 9    | 7    | 15    | 10   |
| 470 | 23   | 24   | 24   | 19   | 23.5  | 10   | 24   | 11    | 14   |
| 471 | 20   | 21   | 13   | 11   | 23    | 6    | 6    | 13    | 13   |
| 472 | 19   | 23   | 13   | 27   | 24    | 5    | 5    | 12    | 22   |
| 473 | 21   | 23.5 | 13.5 | 29   | 25    | 5    | 5    | 12    | 10   |
| 474 | 17   | 24   | 15   | 39   | 24    | 6    | 6    | 12    | 11   |
| 475 | 29   | 27   | 17   | 12   | 32.5  | 9    | 20.5 | 15    | 8    |
| 476 | 22.5 | 34   | 25   | 58   | 27    | 10   | 8.5  | 15    | 18   |
| 477 | 24   | 26   | 16   | 20   | 29    | 9    | 8    | 14    | 9    |
| 478 | 22   | 22   | 17   | 20   | 29    | 9    | 12   | 13    | 11   |
| 479 | 133  | 151  | 456  | 149  | 241   | 84.5 | 235  | 630.5 | 291  |
| 480 | 31   | 32   | 19   | 33   | 55    | 8.5  | 6    | 18    | 13.5 |
| 481 | 29   | 28   | 16   | 12   | 31    | 10   | 5    | 17    | 10   |
| 482 | 28.5 | 32   | 18   | 87   | 28    | 47.5 | 131  | 14    | 14   |
| 483 | 26   | 19   | 18   | 19   | 24    | 26   | 16   | 30    | 24   |
| 484 | 43   | 35.5 | 21   | 57   | 37    | 18   | 35   | 17    | 22   |
| 485 | 29.5 | 21   | 19   | 32   | 33.5  | 18   | 6    | 14    | 19   |
| 486 | 24.5 | 22   | 18   | 14   | 22.5  | 9    | 7    | 14    | 7    |
| 487 | 24   | 21   | 16   | 24.5 | 25    | 9    | 8    | 13    | 5    |
| 488 | 19   | 17   | 13   | 16   | 21    | 4    | 4    | 11    | 5    |
| 489 | 31   | 32   | 19   | 29   | 45    | 11   | 8    | 19    | 7    |
| 490 | 29.5 | 31   | 21   | 14   | 52    | 12   | 8    | 18    | 13   |
| 491 | 22   | 22   | 14   | 11   | 30.5  | 6    | 5    | 14    | 6    |
| 492 | 22   | 25   | 17   | 18   | 26    | 6    | 4    | 13    | 6    |
| 493 | 24   | 24   | 16.5 | 16   | 30.5  | 8    | 8    | 13    | 6    |
| 494 | 26   | 26   | 15   | 31.5 | 115.5 | 16   | 7    | 14    | 52   |
| 495 | 23.5 | 30   | 18   | 18   | 25    | 8    | 6    | 14    | 10   |
| 496 | 26   | 27   | 17   | 17   | 26    | 7.5  | 7    | 15    | 9    |
| 497 | 28   | 23   | 16   | 11.5 | 33.5  | 6    | 17.5 | 12.5  | 14   |
| 498 | 25   | 29   | 19   | 24   | 50.5  | 10.5 | 18   | 14    | 10   |
| 499 | 23   | 24   | 28   | 12   | 28    | 9    | 9    | 14    | 7    |
| 500 | 23   | 24   | 14   | 35   | 42    | 8    | 7    | 12    | 48   |
| 501 | 28   | 28   | 19   | 39   | 32    | 11.5 | 10   | 13    | 15   |
| 502 | 25   | 36.5 | 19   | 21.5 | 32    | 6    | 11.5 | 17    | 7    |
| 503 | 24   | 29   | 17   | 32   | 138.5 | 11   | 31   | 13    | 29   |
| 504 | 26.5 | 23.5 | 17   | 25   | 29    | 14   | 8    | 12.5  | 53   |
| 505 | 23   | 21   | 15   | 13   | 30    | 9    | 9    | 14    | 8.5  |
| 506 | 11   | 7    | 5    | 18   | 5     | 4    | 5    | 4     | 3    |
| 507 | 8    | 8    | 4    | 14   | 7.5   | 7    | 5    | 5     | 6    |
| 508 | 40   | 40   | 29   | 21   | 46    | 11   | 16   | 26    | 17   |
| 509 | 28.5 | 28   | 17   | 14   | 28    | 9    | 6    | 15    | 10   |
| 510 | 31   | 26   | 18   | 11   | 29    | 7    | 5    | 15    | 11   |
| 511 | 26   | 25   | 16   | 14   | 30    | 6    | 4    | 15    | 8    |
| 512 | 27   | 27   | 16   | 21   | 28    | 10   | 6    | 13    | 12.5 |
| 513 | 26   | 27   | 17.5 | 20   | 27    | 10   | 6    | 14    | 9    |
| 514 | 28   | 29   | 20   | 19   | 35.5  | 9    | 13   | 19    | 14   |
| 515 | 29   | 30   | 19   | 19   | 64    | 13   | 8    | 17    | 31   |

|     |      |      |     |      |       |       |     |      |      |
|-----|------|------|-----|------|-------|-------|-----|------|------|
| 516 | 27   | 27   | 18  | 26   | 42    | 8     | 5   | 17   | 21.5 |
| 517 | 30   | 32   | 19  | 88   | 38    | 11    | 8   | 15   | 10.5 |
| 518 | 14   | 12   | 8   | 17   | 14    | 7     | 12  | 7    | 8    |
| 519 | 16   | 10   | 8   | 18   | 29    | 9     | 5   | 6    | 25   |
| 520 | 14   | 12   | 6   | 18   | 10    | 6     | 4   | 6    | 10   |
| 521 | 14   | 9    | 7   | 18   | 10    | 7     | 5   | 7    | 13.5 |
| 522 | 13   | 8    | 7   | 19   | 7     | 6     | 4   | 6    | 22   |
| 523 | 16   | 9    | 7   | 15   | 32.5  | 8     | 5   | 5    | 9    |
| 524 | 6    | 5    | 5   | 9    | 15    | 4     | 3   | 5    | 8    |
| 525 | 26   | 28   | 18  | 6    | 32.5  | 5     | 4.5 | 17   | 6    |
| 526 | 27   | 23   | 14  | 13   | 27.5  | 11    | 6   | 13   | 16   |
| 527 | 38   | 21   | 16  | 10   | 24    | 8.5   | 36  | 14   | 10   |
| 528 | 24   | 24   | 22  | 13   | 25    | 10    | 14  | 12.5 | 21   |
| 529 | 21   | 21   | 17  | 12   | 26    | 9     | 8   | 13   | 7    |
| 530 | 19   | 30.5 | 15  | 55   | 51    | 12    | 9   | 13.5 | 10.5 |
| 531 | 42   | 35.5 | 23  | 22   | 41    | 10    | 9   | 20   | 14.5 |
| 532 | 26   | 22   | 17  | 13   | 45    | 10.5  | 5   | 15   | 26   |
| 533 | 31   | 26   | 18  | 12   | 26    | 11.5  | 5.5 | 14   | 8    |
| 534 | 32   | 28.5 | 20  | 21.5 | 41.5  | 11    | 5   | 18   | 10   |
| 535 | 23.5 | 25   | 15  | 28   | 25    | 8     | 4   | 14   | 10   |
| 536 | 32   | 28.5 | 20  | 21.5 | 41.5  | 11    | 5   | 18   | 10   |
| 537 | 23.5 | 25   | 15  | 28   | 25    | 8     | 4   | 14   | 10   |
| 538 | 23   | 22   | 15  | 22   | 26    | 9     | 5   | 14   | 10   |
| 539 | 23   | 22   | 15  | 22   | 26    | 9     | 5   | 14   | 10   |
| 540 | 24   | 21   | 13  | 16   | 21    | 10    | 5   | 11   | 6    |
| 541 | 23   | 19   | 15  | 21.5 | 21    | 10    | 4   | 12   | 7    |
| 542 | 41   | 23   | 19  | 24   | 26    | 11    | 6   | 14   | 18   |
| 543 | 23   | 23   | 14  | 13   | 23    | 9     | 6   | 13   | 10   |
| 544 | 23   | 25   | 13  | 11   | 23    | 6     | 5   | 12   | 6    |
| 545 | 28   | 27.5 | 19  | 20   | 32    | 18    | 8   | 14   | 10.5 |
| 546 | 25   | 20   | 16  | 11   | 27    | 8     | 7   | 11   | 18   |
| 547 | 24   | 20.5 | 14  | 12   | 22    | 8     | 4   | 12   | 6    |
| 548 | 26.5 | 29   | 25  | 16   | 29.5  | 8.5   | 7   | 16   | 10   |
| 549 | 27   | 24   | 16  | 12   | 26    | 8     | 4   | 13   | 9    |
| 550 | 27   | 24   | 16  | 10   | 26    | 8     | 4   | 15   | 9    |
| 551 | 210  | 210  | 801 | 259  | 397.5 | 129.5 | 389 | 915  | 536  |
| 552 | 23   | 20   | 16  | 12   | 24    | 11    | 8   | 12   | 20   |
| 553 | 24   | 21   | 14  | 13   | 23    | 8     | 3   | 11   | 9    |
| 554 | 23   | 20   | 14  | 10   | 22    | 10    | 3   | 13   | 6    |
| 555 | 23   | 25   | 15  | 23   | 39    | 8     | 3   | 14   | 9    |
| 556 | 23   | 25   | 15  | 23   | 39    | 8     | 3   | 14   | 9    |
| 557 | 19   | 19.5 | 15  | 7    | 23    | 8     | 5   | 12   | 7    |
| 558 | 20.5 | 21   | 14  | 14   | 22.5  | 6     | 6   | 13   | 6    |
| 559 | 22   | 22   | 15  | 18   | 25    | 7     | 6   | 12   | 11   |
| 560 | 18   | 23   | 13  | 15   | 25    | 6     | 4   | 12   | 5    |
| 561 | 20   | 19   | 13  | 25   | 23    | 7     | 5   | 11   | 9    |
| 562 | 24   | 26   | 18  | 27   | 32    | 8     | 11  | 16   | 12   |

|     |      |      |      |      |      |      |     |      |       |
|-----|------|------|------|------|------|------|-----|------|-------|
| 563 | 25   | 24   | 16   | 13   | 30   | 7    | 6   | 14   | 7     |
| 564 | 30   | 26   | 18   | 20   | 36   | 31.5 | 13  | 21   | 18    |
| 565 | 26   | 23   | 17   | 14   | 27   | 8    | 5   | 15   | 13    |
| 566 | 25   | 26   | 16   | 35   | 41   | 7    | 8   | 13   | 13    |
| 567 | 22   | 25   | 17   | 18   | 28   | 10   | 8   | 14   | 9     |
| 568 | 26.5 | 23   | 13   | 17   | 25   | 9    | 7   | 13   | 6.5   |
| 569 | 25   | 20.5 | 14   | 10   | 22   | 10   | 8   | 14   | 9     |
| 570 | 24   | 21   | 14   | 12   | 38   | 9    | 5   | 12   | 21    |
| 571 | 39   | 32   | 19   | 15   | 34   | 14   | 7   | 17.5 | 13    |
| 572 | 67   | 24   | 16   | 23.5 | 28   | 15   | 6   | 16   | 17    |
| 573 | 24   | 21   | 15   | 18   | 22   | 7    | 6   | 15   | 7     |
| 574 | 27   | 22   | 13   | 18   | 23   | 10   | 5   | 12   | 20    |
| 575 | 26   | 20   | 13.5 | 14.5 | 19   | 7    | 5   | 12   | 23    |
| 576 | 31   | 28   | 15   | 19.5 | 33   | 14   | 5   | 14   | 12    |
| 577 | 23   | 21   | 21   | 10   | 27   | 6    | 4   | 13.5 | 6     |
| 578 | 23   | 21   | 26   | 11.5 | 28   | 7    | 6   | 13   | 6     |
| 579 | 32   | 27.5 | 21   | 16   | 35   | 10   | 14  | 19   | 17    |
| 580 | 24   | 21   | 14   | 10   | 26   | 8    | 6   | 14   | 6     |
| 581 | 20   | 22   | 14   | 21   | 25   | 9    | 12  | 12   | 14.5  |
| 582 | 28   | 29.5 | 20   | 18   | 33   | 11.5 | 7   | 16   | 8     |
| 583 | 29   | 27   | 19   | 11   | 29   | 10   | 6   | 16   | 7     |
| 584 | 28   | 24   | 16   | 18   | 29   | 10   | 5   | 14   | 13.5  |
| 585 | 23   | 36   | 17   | 16.5 | 25.5 | 9    | 6   | 16   | 6     |
| 586 | 32   | 21   | 15   | 19   | 24   | 11   | 6   | 13   | 18    |
| 587 | 29   | 30   | 19   | 27   | 42   | 8    | 8   | 18   | 17    |
| 588 | 28   | 25   | 16   | 14.5 | 33   | 9    | 6   | 19   | 202.5 |
| 589 | 27   | 28   | 19   | 11   | 34   | 8    | 12  | 66   | 10    |
| 590 | 25   | 33   | 17   | 17   | 32   | 8    | 8   | 15   | 7     |
| 591 | 33   | 28.5 | 17   | 16   | 31   | 8    | 6   | 13   | 15    |
| 592 | 28.5 | 24   | 15   | 27   | 48   | 21   | 132 | 15   | 15    |
| 593 | 23   | 20.5 | 20   | 27   | 26   | 9    | 11  | 14   | 5     |
| 594 | 10   | 6    | 8    | 20   | 6    | 5    | 5   | 5    | 9     |
| 595 | 14   | 14   | 14   | 22   | 7    | 7    | 7   | 6    | 22    |
| 596 | 14   | 9    | 10.5 | 24   | 410  | 7    | 5   | 5    | 76    |
| 597 | 8    | 9    | 5    | 14   | 9    | 6    | 5   | 5    | 10    |
| 598 | 26   | 8    | 9    | 56   | 8.5  | 12   | 6   | 6    | 8     |
| 599 | 22   | 21   | 14   | 11   | 20   | 10.5 | 6   | 12   | 9     |
| 600 | 29.5 | 15   | 17   | 10.5 | 25   | -1   | 3   | 8    | 11    |
| 601 | 24   | 19   | 13   | 17   | 22   | 18   | 6   | 11   | 17    |
| 602 | 24   | 19   | 13   | 17   | 22   | 18   | 6   | 11   | 17    |
| 603 | 36   | 24   | 17   | 18   | 30   | 10   | 6   | 14   | 33    |
| 604 | 24   | 24   | 15   | 11   | 26   | 6    | 4   | 15   | 8     |
| 605 | 34   | 27   | 16   | 11   | 29   | 11   | 5   | 16   | 19    |
| 606 | 26   | 22   | 15   | 11   | 25   | 8    | 5   | 13   | 18    |
| 607 | 26   | 25   | 15   | 13   | 27   | 10   | 6   | 15   | 7     |
| 608 | 27   | 22   | 15   | 20   | 26   | 7    | 5   | 14   | 10    |
| 609 | 24   | 24   | 15   | 11   | 26   | 6    | 4   | 15   | 8     |

|     |       |       |       |      |       |       |     |        |       |
|-----|-------|-------|-------|------|-------|-------|-----|--------|-------|
| 610 | 34    | 27    | 16    | 11   | 29    | 11    | 5   | 16     | 19    |
| 611 | 26    | 22    | 15    | 11   | 25    | 8     | 5   | 13     | 18    |
| 612 | 26    | 25    | 15    | 13   | 27    | 10    | 6   | 15     | 7     |
| 613 | 27    | 22    | 15    | 20   | 26    | 7     | 5   | 14     | 10    |
| 614 | 31    | 23    | 15    | 14   | 25    | 11    | 4   | 15     | 10    |
| 615 | 34    | 25    | 15    | 13.5 | 26    | 9     | 7   | 14     | 10    |
| 616 | 32    | 28    | 21    | 39   | 27.5  | 11.5  | 11  | 17     | 14    |
| 617 | 21    | 26    | 13    | 27   | 28    | 10    | 4   | 13     | 11    |
| 618 | 25    | 22    | 16    | 18   | 24    | 6     | 5   | 13     | 9     |
| 619 | 24    | 24    | 14    | 24   | 25    | 9     | 4   | 12     | 19    |
| 620 | 24    | 23    | 14    | 23   | 24    | 9     | 8   | 14     | 19    |
| 621 | 23    | 22    | 16    | 15   | 24.5  | 9     | 5   | 14     | 9     |
| 622 | 23    | 22    | 14    | 22.5 | 27    | 8     | 4   | 11     | 58.5  |
| 623 | 31    | 20    | 14    | 13.5 | 23    | 12    | 4   | 13     | 9     |
| 624 | 25    | 20    | 13    | 10   | 22    | 6     | 3   | 11     | 7     |
| 625 | 32    | 21    | 14    | 28   | 24    | 8     | 8   | 13     | 10    |
| 626 | 28    | 20    | 13    | 20   | 20.5  | 9     | 5   | 11     | 10    |
| 627 | 24    | 25    | 17    | 17   | 34    | 8     | 6   | 15     | 7     |
| 628 | 27    | 34    | 18    | 33.5 | 38.5  | 9     | 36  | 16     | 11    |
| 629 | 32    | 33    | 23    | 58   | 35    | 16    | 10  | 16     | 16    |
| 630 | 27.5  | 25    | 23    | 15   | 34.5  | 12    | 9   | 15     | 15    |
| 631 | 33    | 28    | 17    | 26   | 30    | 18    | 5   | 16     | 9     |
| 632 | 27    | 25    | 19    | 16   | 25    | 8     | 4   | 15     | 8     |
| 633 | 23    | 24    | 15    | 12   | 24    | 8     | 7.5 | 13     | 9     |
| 634 | 21    | 17    | 13    | 16   | 24    | 9     | 7   | 11     | 10.5  |
| 635 | 25    | 24    | 16    | 17   | 28    | 9     | 10  | 15     | 10    |
| 636 | 26    | 24    | 17    | 21   | 70.5  | 10    | 5   | 14     | 13    |
| 637 | 268   | 232   | 954   | 277  | 406   | 151.5 | 468 | 1057.5 | 663.5 |
| 638 | 28    | 21    | 16    | 11   | 24.5  | 11    | 5   | 14     | 8     |
| 639 | 26    | 20    | 15    | 17   | 25    | 8     | 6   | 12     | 7     |
| 640 | 25    | 26    | 16    | 27   | 28.5  | 6     | 5   | 13     | 7     |
| 641 | 33    | 49    | 18    | 36   | 33.5  | 19    | 17  | 16     | 10    |
| 642 | 27    | 34    | 20    | 73   | 28    | 13    | 14  | 13     | 15    |
| 643 | 24    | 23    | 16    | 25.5 | 25.5  | 11    | 6   | 12     | 25    |
| 644 | 22    | 23.5  | 16    | 27   | 23    | 6     | 6   | 12     | 17    |
| 645 | 22    | 27.5  | 17    | 34   | 25    | 7     | 7   | 17     | 17    |
| 646 | 238   | 194.5 | 738   | 240  | 312.5 | 119   | 382 | 780    | 532   |
| 647 | 26    | 26    | 13    | 31   | 27    | 9     | 6   | 14     | 16.5  |
| 648 | 20    | 19    | 14    | 12   | 21.5  | 5     | 5   | 11     | 5     |
| 649 | 149.5 | 165   | 531.5 | 207  | 213   | 90.5  | 271 | 686    | 399   |
| 650 | 23    | 23    | 14    | 25   | 24    | 7     | 6   | 14     | 7     |
| 651 | 28    | 21.5  | 16    | 20   | 23    | 12    | 5   | 11     | 22    |
| 652 | 35.5  | 35.5  | 20    | 40.5 | 29    | 7     | 16  | 17     | 13    |
| 653 | 26    | 22.5  | 16    | 13   | 57    | 11    | 8   | 15     | 13    |
| 654 | 28    | 24    | 16    | 24.5 | 31    | 10.5  | 6   | 15     | 16    |
| 655 | 24    | 25.5  | 15    | 31   | 31    | 9     | 5   | 13     | 12    |
| 656 | 36    | 25    | 20    | 16   | 35.5  | 34    | 9   | 12     | 13.5  |



|     |       |       |       |       |       |       |       |        |       |
|-----|-------|-------|-------|-------|-------|-------|-------|--------|-------|
| 657 | 23    | 24    | 14.5  | 25    | 25    | 6     | 4     | 14     | 5     |
| 658 | 26    | 25    | 15    | 20    | 34    | 10    | 15    | 21.5   | 9     |
| 659 | 27    | 26.5  | 18    | 15    | 27    | 9.5   | 9     | 12     | 8     |
| 660 | 47.5  | 22    | 16    | 10    | 25    | 8.5   | 6.5   | 15     | 8     |
| 661 | 26    | 23    | 14    | 15    | 27    | 9     | 18    | 12     | 9     |
| 662 | 29.5  | 32    | 17    | 17.5  | 38    | 9     | 43    | 15.5   | 9     |
| 663 | 24    | 22    | 16    | 11.5  | 25    | 6     | 5.5   | 13     | 7     |
| 664 | 27.5  | 28.5  | 17    | 23    | 29    | 10    | 7     | 13     | 15    |
| 665 | 240   | 233.5 | 776   | 274.5 | 415   | 142   | 407   | 965.5  | 538   |
| 666 | 25    | 28    | 18.5  | 14    | 29    | 8.5   | 6     | 13     | 8     |
| 667 | 26    | 24    | 16    | 23    | 27    | 9     | 5     | 13.5   | 40    |
| 668 | 255   | 258   | 862.5 | 305   | 495   | 150   | 452.5 | 1046   | 650   |
| 669 | 21    | 24    | 20    | 19    | 24    | 7     | 8     | 13     | 12    |
| 670 | 26    | 25    | 17    | 36    | 28    | 10    | 6     | 14     | 38    |
| 671 | 23.5  | 27    | 16    | 11    | 29.5  | 10.5  | 18    | 13     | 7     |
| 672 | 33    | 24    | 15    | 27    | 23.5  | 15    | 6     | 14     | 21    |
| 673 | 18    | 8     | 5     | 24    | 7     | 10    | 5     | 5      | 7     |
| 674 | 34    | 27    | 19    | 21    | 35    | 10    | 8     | 21     | 21    |
| 675 | 30    | 30    | 17    | 14    | 33    | 9     | 7     | 15     | 10    |
| 676 | 40    | 30    | 17    | 18    | 30    | 17    | 11    | 16     | 28    |
| 677 | 38    | 30    | 20    | 19    | 90.5  | 14.5  | 8     | 18     | 37    |
| 678 | 34    | 27    | 23    | 19    | 29    | 12    | 9     | 15     | 12    |
| 679 | 24    | 23    | 17    | 30.5  | 35    | 10    | 6     | 15     | 9     |
| 680 | 28    | 26    | 16    | 23    | 31    | 13    | 178   | 16     | 20    |
| 681 | 23    | 25    | 16    | 80.5  | 211   | 11    | 20.5  | 23     | 9     |
| 682 | 30    | 35    | 18    | 44    | 32    | 33    | 25    | 15     | 14    |
| 683 | 26    | 28.5  | 16    | 32    | 28    | 11    | 5     | 13     | 13    |
| 684 | 18    | 10    | 6     | 22    | 18.5  | 8     | 5.5   | 6      | 19    |
| 685 | 15.5  | 11    | 8     | 25    | 13    | 8     | 6     | 5      | 16    |
| 686 | 245   | 220.5 | 868   | 281   | 439   | 143   | 435.5 | 1027.5 | 646.5 |
| 687 | 15    | 8     | 9     | 16    | 8.5   | 11    | 6     | 6      | 39    |
| 688 | 28.5  | 8     | 11    | 15    | 73.5  | 6     | 8.5   | 7      | 8     |
| 689 | 76    | 9     | 5     | 22    | 6     | 10    | 18    | 6      | 9     |
| 690 | 25.5  | 24    | 14    | 19    | 26    | 16    | 5.5   | 13     | 64    |
| 691 | 31.5  | 27    | 18    | 16    | 30    | 16    | 6     | 15     | 20    |
| 692 | 240   | 225   | 879   | 261.5 | 389.5 | 128   | 403   | 894    | 537   |
| 693 | 255.5 | 230   | 916   | 270   | 392   | 139.5 | 400   | 935.5  | 579   |
| 694 | 26    | 20    | 13    | 14    | 19    | 15    | 5     | 13     | 17.5  |
| 695 | 24    | 22    | 13    | 26    | 19    | 7     | 6     | 11     | 47.5  |
| 696 | 255.5 | 230   | 916   | 270   | 392   | 139.5 | 400   | 935.5  | 579   |
| 697 | 26    | 20    | 13    | 14    | 19    | 15    | 5     | 13     | 17.5  |
| 698 | 24    | 22    | 13    | 26    | 19    | 7     | 6     | 11     | 47.5  |
| 699 | 29    | 29    | 18    | 16    | 31.5  | 10    | 6     | 16     | 18    |
| 700 | 30    | 29    | 17    | 14    | 30    | 9     | 5     | 16     | 7     |
| 701 | 32    | 26    | 18    | 13    | 31    | 9     | 5     | 15     | 9     |
| 702 | 33    | 27    | 16.5  | 23.5  | 28    | 10    | 6     | 16     | 10    |
| 703 | 32    | 28.5  | 16    | 14.5  | 29    | 11    | 4     | 15     | 13    |

|     |       |      |      |      |       |      |       |       |      |
|-----|-------|------|------|------|-------|------|-------|-------|------|
| 704 | 30    | 29   | 17   | 14   | 30    | 9    | 5     | 16    | 7    |
| 705 | 32    | 26   | 18   | 13   | 31    | 9    | 5     | 15    | 9    |
| 706 | 33    | 27   | 16.5 | 23.5 | 28    | 10   | 6     | 16    | 10   |
| 707 | 32    | 28.5 | 16   | 14.5 | 29    | 11   | 4     | 15    | 13   |
| 708 | 25    | 22   | 16   | 19   | 24    | 9    | 4     | 13    | 6    |
| 709 | 25    | 22   | 16   | 19   | 24    | 9    | 4     | 13    | 6    |
| 710 | 27    | 25.5 | 17   | 20   | 27    | 11   | 5     | 14    | 17.5 |
| 711 | 57    | 21   | 16   | 24   | 27    | 9    | 5     | 13    | 26   |
| 712 | 31    | 21   | 14   | 19   | 23    | 15.5 | 6     | 14    | 10   |
| 713 | 31    | 29   | 19   | 17   | 30    | 7    | 5     | 14    | 11   |
| 714 | 30    | 27   | 20   | 21   | 31    | 9    | 7     | 16    | 11   |
| 715 | 38.5  | 25   | 16   | 20   | 30    | 18   | 7     | 13    | 13   |
| 716 | 34    | 19   | 12   | 11   | 23    | 14   | 4     | 13    | 8    |
| 717 | 20    | 19.5 | 14   | 13   | 20    | 8    | 4     | 13    | 10   |
| 718 | 28    | 21   | 13   | 11   | 23    | 11   | 4     | 16    | 7    |
| 719 | 25    | 21.5 | 13   | 16   | 22    | 7    | 4     | 13    | 11   |
| 720 | 25    | 22.5 | 14   | 11.5 | 28    | 8    | 5     | 14    | 11   |
| 721 | 32.5  | 26   | 18   | 14   | 30    | 18   | 6     | 15    | 9    |
| 722 | 32    | 23   | 16   | 16   | 26    | 11   | 4     | 13    | 9    |
| 723 | 26    | 20   | 14   | 10   | 26    | 8    | 4     | 12.5  | 8    |
| 724 | 32    | 18   | 13   | 16   | 22    | 12   | 5     | 13    | 7    |
| 725 | 27    | 21   | 14   | 15   | 23    | 10   | 5.5   | 15    | 10   |
| 726 | 30    | 18   | 14   | 19   | 21    | 12   | 4     | 14    | 7    |
| 727 | 328.5 | 270  | 1938 | 134  | 543.5 | 185  | 538   | 802   | 949  |
| 728 | 21.5  | 23   | 13   | 24   | 21    | 9    | 27    | 13    | 10   |
| 729 | 16    | 10   | 9    | 28   | 8     | 9    | 10    | 6     | 22   |
| 730 | 25.5  | 20   | 15   | 8    | 26    | 7.5  | 5     | 12    | 8    |
| 731 | 26    | 26   | 16   | 18   | 33.5  | 9    | 9     | 14    | 8    |
| 732 | 24    | 21   | 14   | 26   | 31    | 9    | 9     | 12    | 5    |
| 733 | 279   | 235  | 981  | 265  | 442   | 163  | 441.5 | 931.5 | 659  |
| 734 | 28    | 29.5 | 19   | 38   | 28    | 18   | 10    | 14    | 47   |
| 735 | 18    | 18.5 | 12   | 28   | 22    | 6    | 4.5   | 11    | 6    |
| 736 | 18    | 23   | 12   | 29   | 22    | 6    | 5     | 12    | 12   |
| 737 | 22    | 22   | 11   | 24   | 22    | 5    | 4.5   | 12    | 12   |
| 738 | 29    | 26.5 | 19   | 97   | 54.5  | 13   | 9     | 16    | 10   |
| 739 | 27    | 30.5 | 17.5 | 27   | 35    | 12.5 | 8     | 16    | 35   |
| 740 | 41    | 20   | 36   | 24.5 | 21    | 13   | 5     | 14    | 16   |
| 741 | 32    | 25   | 16   | 26.5 | 32    | 14   | 8     | 13    | 12   |
| 742 | 26    | 26.5 | 17   | 26   | 31    | 9    | 8     | 13    | 8    |
| 743 | 27    | 19.5 | 14   | 8    | 25    | 10.5 | 6     | 11    | 10   |
| 744 | 37    | 35   | 22   | 24   | 50    | 17.5 | 9     | 17.5  | 10   |
| 745 | 37    | 35   | 21   | 27   | 33    | 12   | 10    | 12    | 10   |
| 746 | 23    | 21   | 15   | 14   | 41    | 13   | 5.5   | 12    | 10   |
| 747 | 25    | 21   | 14   | 16   | 32    | 9    | 9     | 13    | 12   |
| 748 | 22    | 25   | 15   | 20   | 23    | 8    | 9     | 11    | 8    |
| 749 | 34    | 26   | 31.5 | 18   | 31    | 17   | 12    | 13    | 14.5 |
| 750 | 33    | 49   | 40   | 168  | 37.5  | 20   | 18    | 17.5  | 11.5 |

|     |      |       |      |       |       |       |       |        |       |
|-----|------|-------|------|-------|-------|-------|-------|--------|-------|
| 751 | 24   | 21    | 14   | 18    | 31    | 11    | 5     | 64     | 28    |
| 752 | 22   | 22    | 17   | 14    | 26    | 7     | 6     | 14     | 6     |
| 753 | 22   | 19    | 12   | 12    | 24    | 5     | 6     | 12     | 9     |
| 754 | 29   | 23    | 15   | 17.5  | 28    | 12    | 5.5   | 13     | 33    |
| 755 | 19   | 6     | 5    | 14    | 5     | 6     | 5     | 5      | 6     |
| 756 | 18   | 6     | 6    | 17    | 6     | 8     | 4     | 5      | 8     |
| 757 | 19   | 10    | 9    | 19    | 9     | 11    | 6     | 5      | 14    |
| 758 | 36   | 33    | 20   | 21.5  | 37    | 15    | 12    | 17     | 13.5  |
| 759 | 31   | 29    | 20   | 14    | 33    | 10    | 7     | 16     | 33    |
| 760 | 29   | 29    | 22   | 25.5  | 33.5  | 9.5   | 7     | 19     | 19    |
| 761 | 273  | 237   | 993  | 282.5 | 486   | 174   | 488.5 | 1155.5 | 649   |
| 762 | 21   | 15    | 10.5 | 36    | 12    | 11    | 9     | 8      | 16    |
| 763 | 18   | 12    | 7    | 35    | 7     | 10    | 5     | 6      | 17.5  |
| 764 | 286  | 235   | 1025 | 258   | 512   | 172.5 | 505   | 1076   | 711.5 |
| 765 | 17   | 13    | 11   | 35    | 12    | 11.5  | 9     | 7      | 26.5  |
| 766 | 16   | 10    | 6    | 18    | 11    | 12    | 7     | 5.5    | 23    |
| 767 | 13   | 5     | 6    | 11    | 5     | 6     | 5     | 6      | 3     |
| 768 | 10   | 7     | 7    | 15    | 9     | 7     | 6     | 5      | 5     |
| 769 | 26   | 28    | 34   | 23    | 26.5  | 7.5   | 6     | 16     | 8     |
| 770 | 37   | 22.5  | 17   | 12    | 32    | 27    | 13    | 16     | 9     |
| 771 | 32   | 21    | 14   | 15    | 20    | 11    | 5     | 12     | 14    |
| 772 | 23   | 18.5  | 16   | 26.5  | 20    | 10    | 5     | 13     | 12    |
| 773 | 32   | 21    | 14   | 15    | 20    | 11    | 5     | 12     | 14    |
| 774 | 23   | 18.5  | 16   | 26.5  | 20    | 10    | 5     | 13     | 12    |
| 775 | 47   | 41    | 23   | 28    | 39    | 13.5  | 9     | 20     | 17    |
| 776 | 30.5 | 30    | 22   | 17    | 89.5  | 12    | 6     | 17     | 14    |
| 777 | 37   | 30    | 18   | 22    | 36.5  | 11    | 5     | 17     | 8     |
| 778 | 27   | 27.5  | 16   | 14    | 29    | 11    | 8     | 16     | 13    |
| 779 | 26   | 21    | 14.5 | 13    | 27    | 7     | 4     | 16     | 8     |
| 780 | 37   | 30    | 18   | 22    | 36.5  | 11    | 5     | 17     | 8     |
| 781 | 27   | 27.5  | 16   | 14    | 29    | 11    | 8     | 16     | 13    |
| 782 | 26   | 21    | 14.5 | 13    | 27    | 7     | 4     | 16     | 8     |
| 783 | 23   | 20    | 15   | 18    | 24    | 8     | 5     | 11     | 16    |
| 784 | 31   | 22    | 15   | 25    | 24.5  | 11    | 6     | 13.5   | 10    |
| 785 | 24   | 25    | 15   | 13.5  | 27    | 11    | 4.5   | 15.5   | 12    |
| 786 | 57.5 | 25    | 16   | 19    | 28    | 12.5  | 9     | 14     | 19    |
| 787 | 55   | 24    | 15   | 17    | 25    | 13.5  | 6     | 14     | 15.5  |
| 788 | 43   | 27    | 16   | 31    | 27    | 12    | 6     | 15     | 23    |
| 789 | 35   | 26    | 17   | 22    | 28    | 10    | 6     | 14     | 12    |
| 790 | 32   | 22    | 17   | 20    | 25    | 13    | 7     | 9      | 8     |
| 791 | 29   | 21    | 13   | 18    | 21    | 10    | 4     | 14     | 9     |
| 792 | 28   | 29    | 17   | 25    | 31    | 10    | 10    | 15     | 9     |
| 793 | 29   | 24    | 15   | 16    | 26    | 10    | 4     | 14     | 13    |
| 794 | 20   | 20    | 15   | 20    | 22.5  | 9.5   | 8     | 13     | 9     |
| 795 | 297  | 299.5 | 1739 | 154   | 404.5 | 192   | 509   | 1010.5 | 937   |
| 796 | 29.5 | 28    | 17   | 19    | 32    | 9     | 7     | 15     | 12    |
| 797 | 8    | 7.5   | 5    | 15    | 5     | 6     | 5     | 5      | 8     |

|     |      |      |       |       |       |      |     |       |      |
|-----|------|------|-------|-------|-------|------|-----|-------|------|
| 798 | 41   | 36.5 | 23    | 19.5  | 43    | 12   | 6   | 19    | 16   |
| 799 | 31.5 | 23   | 15    | 22    | 25    | 9.5  | 6   | 13    | 10   |
| 800 | 66.5 | 24   | 16.5  | 20    | 28.5  | 17   | 9   | 14    | 19   |
| 801 | 31   | 26   | 18.5  | 26    | 31    | 15   | 6   | 13    | 30.5 |
| 802 | 31   | 22   | 18    | 19    | 27    | 10.5 | 20  | 14    | 24   |
| 803 | 34   | 26   | 21    | 18    | 36    | 12   | 14  | 18    | 13   |
| 804 | 29   | 28   | 29    | 29.5  | 28.5  | 16   | 7   | 15    | 20   |
| 805 | 22   | 25   | 14    | 23    | 29    | 5    | 5   | 14    | 17.5 |
| 806 | 26   | 23   | 14    | 28    | 29    | 15   | 7   | 13    | 24   |
| 807 | 21.5 | 20   | 12    | 19    | 21    | 7    | 3   | 11    | 8    |
| 808 | 29.5 | 29   | 18    | 31    | 31    | 15   | 9   | 15    | 18   |
| 809 | 32.5 | 34   | 50    | 33    | 34    | 14   | 37  | 17    | 19.5 |
| 810 | 27   | 31   | 17    | 48    | 39    | 10   | 7   | 15    | 32   |
| 811 | 40   | 29   | 20    | 23    | 43    | 22   | 9   | 19    | 23.5 |
| 812 | 27   | 28   | 17    | 41.5  | 29    | 12   | 22  | 15    | 12   |
| 813 | 29   | 27   | 15    | 38    | 26.5  | 12   | 7   | 18    | 23   |
| 814 | 33   | 24   | 22    | 70    | 36    | 11   | 26  | 14    | 14   |
| 815 | 230  | 213  | 757.5 | 230   | 366.5 | 133  | 378 | 981.5 | 540  |
| 816 | 41.5 | 30   | 18    | 21    | 35    | 16   | 6   | 19    | 33.5 |
| 817 | 25   | 27   | 22    | 15    | 26.5  | 9    | 9   | 16    | 8    |
| 818 | 26   | 21   | 14    | 21    | 25    | 6    | 5   | 13    | 7    |
| 819 | 28   | 22   | 14    | 36    | 21    | 15   | 7   | 11.5  | 36.5 |
| 820 | 28   | 23   | 17    | 13    | 29    | 6    | 5   | 14    | 8    |
| 821 | 28   | 24   | 19    | 13    | 26    | 7    | 4   | 13    | 8.5  |
| 822 | 54   | 45   | 21    | 43    | 61.5  | 15   | 7   | 18.5  | 11   |
| 823 | 251  | 233  | 885   | 265.5 | 360   | 152  | 431 | 935   | 624  |
| 824 | 35   | 28   | 19    | 17    | 35    | 20.5 | 7   | 18    | 20   |
| 825 | 28   | 25   | 16    | 21    | 37    | 10.5 | 9   | 15    | 15.5 |
| 826 | 35   | 41   | 30    | 71    | 37    | 23   | 12  | 16    | 16   |
| 827 | 26   | 26   | 17    | 12    | 27    | 10   | 12  | 15    | 30   |
| 828 | 30   | 27   | 20    | 23    | 26    | 17   | 7.5 | 15    | 27   |
| 829 | 21   | 33   | 16    | 41    | 60    | 9    | 9   | 12.5  | 17   |
| 830 | 15   | 8    | 17    | 24.5  | 5     | 4    | 5   | 4     | 4    |
| 831 | 17.5 | 7.5  | 6     | 16    | 8     | 10   | 6   | 6     | 17   |
| 832 | 28.5 | 29   | 17    | 14    | 30.5  | 8    | 5   | 15.5  | 11   |
| 833 | 27   | 24   | 18    | 15    | 36    | 8    | 6   | 15    | 24   |
| 834 | 25   | 25   | 16    | 21    | 32    | 11   | 7   | 15    | 19   |
| 835 | 24.5 | 25   | 17    | 19    | 38    | 10   | 6   | 14    | 14   |
| 836 | 37   | 23   | 16    | 19    | 29    | 16   | 6   | 14    | 15   |
| 837 | 17   | 10   | 6.5   | 25.5  | 8     | 8    | 5   | 6     | 24   |
| 838 | 25   | 9    | 8     | 27    | 11    | 5.5  | 7   | 6     | 15   |
| 839 | 15   | 27   | 9     | 60.5  | 10    | 11   | 15  | 15    | 117  |
| 840 | 13   | 13   | 8     | 36    | 11    | 17   | 7   | 5     | 18   |
| 841 | 27   | 23   | 17    | 15    | 31    | 12   | 10  | 14    | 36   |
| 842 | 22.5 | 22   | 20    | 18    | 24    | 7    | 14  | 13    | 16   |
| 843 | 30   | 30   | 16    | 43    | 27    | 14.5 | 15  | 15    | 52   |
| 844 | 26   | 22   | 17    | 16    | 26    | 12   | 7   | 12    | 9    |

|     |      |      |        |      |       |       |       |        |       |
|-----|------|------|--------|------|-------|-------|-------|--------|-------|
| 845 | 25.5 | 20   | 14     | 17   | 21    | 10    | 6.5   | 11     | 30    |
| 846 | 31.5 | 21   | 20     | 22   | 21    | 14.5  | 12    | 11     | 11    |
| 847 | 24   | 19   | 14     | 19   | 20    | 11    | 6     | 11     | 18    |
| 848 | 24   | 19   | 14     | 19   | 20    | 11    | 6     | 11     | 18    |
| 849 | 284  | 243  | 1042   | 298  | 433   | 156   | 464   | 1072   | 600.5 |
| 850 | 32.5 | 26   | 18     | 10   | 28    | 10    | 5     | 15     | 8     |
| 851 | 42   | 36.5 | 25     | 26   | 34    | 12    | 6     | 17     | 11    |
| 852 | 29   | 24.5 | 16     | 16   | 32    | 8     | 6     | 13     | 22    |
| 853 | 42   | 36.5 | 25     | 26   | 34    | 12    | 6     | 17     | 11    |
| 854 | 29   | 24.5 | 16     | 16   | 32    | 8     | 6     | 13     | 22    |
| 855 | 295  | 254  | 1066.5 | 315  | 421   | 171.5 | 523   | 1154.5 | 699.5 |
| 856 | 25   | 21   | 15     | 17   | 22    | 11    | 6     | 13     | 7.5   |
| 857 | 26   | 21.5 | 18     | 37   | 27    | 9     | 5     | 13     | 11    |
| 858 | 34   | 21   | 14     | 18   | 24    | 12    | 5     | 13     | 13    |
| 859 | 295  | 254  | 1066.5 | 315  | 421   | 171.5 | 523   | 1154.5 | 699.5 |
| 860 | 25   | 21   | 15     | 17   | 22    | 11    | 6     | 13     | 7.5   |
| 861 | 26   | 21.5 | 18     | 37   | 27    | 9     | 5     | 13     | 11    |
| 862 | 34   | 21   | 14     | 18   | 24    | 12    | 5     | 13     | 13    |
| 863 | 27   | 28   | 17     | 24   | 30    | 12    | 5     | 16     | 11    |
| 864 | 28.5 | 24   | 16     | 20   | 23    | 12    | 6     | 13     | 23    |
| 865 | 31   | 24   | 15     | 21   | 29    | 10    | 8     | 13     | 10    |
| 866 | 23.5 | 21   | 14     | 18   | 24    | 8     | 4     | 14     | 23    |
| 867 | 26.5 | 29   | 18     | 20   | 31    | 9     | 5     | 15     | 12    |
| 868 | 58   | 24   | 15     | 16   | 28    | 9     | 9     | 14     | 17    |
| 869 | 241  | 221  | 872.5  | 266  | 465   | 145   | 412.5 | 995    | 576   |
| 870 | 48   | 40   | 19.5   | 16   | 32    | 11    | 10    | 17     | 8     |
| 871 | 23   | 22   | 13     | 15   | 26    | 9     | 3     | 12     | 10    |
| 872 | 275  | 260  | 953    | 267  | 490.5 | 168   | 478.5 | 962    | 673.5 |
| 873 | 19   | 9    | 13     | 22   | 7     | 7     | 9     | 7      | 13    |
| 874 | 34   | 27   | 16     | 22   | 37    | 12    | 5     | 15     | 12    |
| 875 | 53   | 29   | 18     | 25   | 27    | 11    | 10    | 14     | 24    |
| 876 | 42   | 23   | 16     | 19   | 27    | 11    | 7     | 15     | 44    |
| 877 | 25   | 24   | 14     | 14   | 42    | 7     | 5.5   | 13     | 11    |
| 878 | 31   | 34   | 21     | 34   | 32    | 11    | 9     | 17     | 15    |
| 879 | 30   | 23   | 17     | 28   | 26    | 20.5  | 7     | 15     | 16    |
| 880 | 33   | 33   | 30     | 36   | 34    | 20    | 18    | 16     | 14    |
| 881 | 35   | 24   | 19     | 27   | 30    | 15    | 6     | 16     | 13    |
| 882 | 24.5 | 22   | 14     | 16   | 31    | 11    | 6     | 14     | 42.5  |
| 883 | 35   | 25   | 15     | 18.5 | 25    | 9     | 5     | 13     | 30    |
| 884 | 33   | 25   | 15     | 25   | 25    | 17    | 7     | 13     | 12    |
| 885 | 30   | 21   | 14     | 19   | 25    | 17    | 5     | 12     | 22    |
| 886 | 34   | 23   | 13     | 19   | 23    | 13    | 6     | 12.5   | 48    |
| 887 | 43   | 35   | 24     | 32.5 | 38.5  | 12    | 52    | 21     | 18.5  |
| 888 | 35   | 39   | 28     | 26.5 | 46.5  | 11    | 15    | 22     | 14.5  |
| 889 | 302  | 237  | 984    | 270  | 441   | 155   | 429.5 | 988.5  | 637.5 |
| 890 | 32   | 22   | 16     | 14   | 26    | 6     | 6     | 12     | 6     |
| 891 | 28   | 26   | 17     | 14   | 32    | 13    | 10    | 15     | 12    |

|     |      |      |      |      |       |      |      |        |       |
|-----|------|------|------|------|-------|------|------|--------|-------|
| 892 | 35   | 35   | 22   | 18   | 34.5  | 8    | 7    | 18     | 11    |
| 893 | 31   | 28   | 19   | 21   | 35    | 9    | 9    | 16     | 11    |
| 894 | 31   | 30   | 16.5 | 31   | 74    | 23   | 7.5  | 13     | 29    |
| 895 | 34.5 | 43   | 23   | 76   | 62    | 24.5 | 85   | 15     | 17    |
| 896 | 36   | 25   | 15   | 32   | 23    | 16   | 6    | 12     | 33    |
| 897 | 18.5 | 24   | 18.5 | 25   | 26    | 6    | 12.5 | 12     | 18    |
| 898 | 16   | 9    | 10   | 24   | 6     | 7    | 6    | 6      | 13    |
| 899 | 39.5 | 31   | 21   | 23   | 35    | 15   | 7    | 18     | 28    |
| 900 | 30   | 31   | 24   | 25   | 42.5  | 10   | 38   | 16     | 20    |
| 901 | 298  | 267  | 1103 | 345  | 488.5 | 173  | 539  | 1135.5 | 670.5 |
| 902 | 32.5 | 26   | 18   | 29   | 24    | 17   | 7    | 16     | 25    |
| 903 | 31   | 52   | 19   | 31   | 29    | 14   | 7    | 15     | 18    |
| 904 | 26   | 9    | 7    | 25.5 | 16.5  | 12   | 6    | 7      | 16    |
| 905 | 22   | 8    | 6    | 19   | 9     | 12   | 64.5 | 4      | 23    |
| 906 | 12   | 9    | 6    | 22.5 | 10    | 5    | 4    | 5      | 21    |
| 907 | 16   | 11   | 16   | 39   | 102   | 12   | 17   | 7      | 26    |
| 908 | 8    | 7    | 5    | 17   | 6     | 6    | 4    | 6      | 3     |
| 909 | -1   | 11.5 | 19   | 21   | 13    | 3.5  | 12   | 8.5    | 25    |
| 910 | 26   | 18   | 16   | 17   | 21    | 16   | 7    | 10.5   | 22    |
| 911 | 33   | 18   | 14   | 21   | 21    | 10   | 7    | 10     | 14    |
| 912 | 28   | 19   | 14   | 17   | 21    | 18   | 6    | 14     | 10    |
| 913 | 23   | 19   | 14   | 22   | 20    | 13.5 | 8    | 12     | 26    |
| 914 | 26   | 18   | 16   | 17   | 21    | 16   | 7    | 10.5   | 22    |
| 915 | 33   | 18   | 14   | 21   | 21    | 10   | 7    | 10     | 14    |
| 916 | 28   | 19   | 14   | 17   | 21    | 18   | 6    | 14     | 10    |
| 917 | 23   | 19   | 14   | 22   | 20    | 13.5 | 8    | 12     | 26    |
| 918 | 37   | 28   | 23   | 20.5 | 39    | 13   | 8    | 17     | 33    |
| 919 | 39   | 31   | 17   | 16   | 32    | 14   | 6    | 18     | 12    |
| 920 | 46   | 28   | 19   | 17   | 34    | 16   | 6    | 17     | 10    |
| 921 | 34   | 27   | 17   | 17   | 31    | 12   | 6    | 17     | 8     |
| 922 | 31.5 | 27.5 | 20   | 18   | 30    | 22   | 5    | 17     | 17    |
| 923 | 41   | 25   | 17   | 16   | 36    | 15   | 6    | 16     | 13    |
| 924 | 27   | 23   | 15   | 20   | 25    | 7    | 5    | 13     | 10    |
| 925 | 34   | 24   | 16   | 19   | 26    | 17   | 5    | 23     | 11    |
| 926 | 32   | 30   | 19   | 19   | 33    | 8    | 6    | 17     | 8     |
| 927 | 39   | 31   | 17   | 16   | 32    | 14   | 6    | 18     | 12    |
| 928 | 46   | 28   | 19   | 17   | 34    | 16   | 6    | 17     | 10    |
| 929 | 34   | 27   | 17   | 17   | 31    | 12   | 6    | 17     | 8     |
| 930 | 31.5 | 27.5 | 20   | 18   | 30    | 22   | 5    | 17     | 17    |
| 931 | 41   | 25   | 17   | 16   | 36    | 15   | 6    | 16     | 13    |
| 932 | 27   | 23   | 15   | 20   | 25    | 7    | 5    | 13     | 10    |
| 933 | 34   | 24   | 16   | 19   | 26    | 17   | 5    | 23     | 11    |
| 934 | 32   | 30   | 19   | 19   | 33    | 8    | 6    | 17     | 8     |
| 935 | 29   | 28   | 17   | 15   | 28    | 10   | 8    | 15     | 16    |
| 936 | 37   | 32.5 | 19   | 54   | 28    | 17   | 6    | 16     | 20    |
| 937 | 33   | 27   | 16   | 16   | 30    | 15   | 6    | 15     | 15    |
| 938 | 32   | 20   | 14   | 16.5 | 24    | 15   | 5    | 14     | 10    |

|     |       |       |        |       |        |      |       |        |        |
|-----|-------|-------|--------|-------|--------|------|-------|--------|--------|
| 939 | 274   | 257.5 | 1012.5 | 273   | 537.5  | 163  | 463   | 1004   | 663    |
| 940 | 24    | 23    | 14     | 25    | 35.5   | 11   | 5     | 13     | 12     |
| 941 | 41    | 34    | 18.5   | 30    | 32     | 16   | 6     | 17     | 16     |
| 942 | 35.5  | 24    | 18     | 18    | 25     | 12   | 7     | 16     | 8      |
| 943 | 56    | 24    | 16     | 17    | 29     | 15   | 9     | 14     | 12     |
| 944 | 40.5  | 26    | 17     | 18.5  | 27.5   | 12   | 6     | 15     | 17     |
| 945 | 26    | 19    | 15     | 16    | 25     | 18   | 4     | 14     | 9      |
| 946 | 27    | 27    | 20.5   | 27    | 39     | 13   | 8     | 16     | 16     |
| 947 | 26    | 21    | 14     | 8     | 24     | 7    | 4     | 13     | 7      |
| 948 | 31.5  | 27    | 15     | 24    | 25.5   | 18.5 | 8     | 15     | 24     |
| 949 | 35    | 24    | 16     | 23    | 27     | 15   | 5     | 15     | 12     |
| 950 | 31    | 23    | 15     | 14    | 24     | 8    | 4     | 13     | 10     |
| 951 | 33    | 26    | 30     | 29    | 31     | 11   | 10    | 14     | 51     |
| 952 | 33    | 25    | 16     | 14    | 32     | 8    | 7     | 15     | 12     |
| 953 | 26    | 19    | 15     | 19    | 21     | 13   | 5     | 13     | 13     |
| 954 | 26    | 19    | 15     | 19    | 21     | 13   | 5     | 13     | 13     |
| 955 | 42    | 26    | 21     | 15    | 30     | 17   | 6     | 15     | 10     |
| 956 | 60.5  | 28    | 19     | 14    | 30     | 22   | 5     | 15     | 9      |
| 957 | 60.5  | 28    | 19     | 14    | 30     | 22   | 5     | 15     | 9      |
| 958 | 24    | 23    | 15     | 21    | 26     | 6    | 8     | 14     | 8      |
| 959 | 532.5 | 428.5 | 3251   | 211.5 | 1058.5 | 367  | 901   | 1321.5 | 1409   |
| 960 | 24.5  | 26    | 13     | 23    | 31     | 6    | 33.5  | 13     | 8      |
| 961 | 20    | 25    | 15     | 35    | 32     | 6.5  | 7     | 14     | 19.5   |
| 962 | 28    | 34    | 20     | 19    | 30.5   | 15   | 10    | 17     | 11     |
| 963 | 30    | 30.5  | 20     | 27    | 38     | 16   | 11    | 16     | 31.5   |
| 964 | 29    | 26    | 17     | 21    | 31     | 9    | 6     | 17     | 17     |
| 965 | 38.5  | 25    | 14     | 9     | 29     | 13   | 4     | 14     | 10     |
| 966 | 28    | 24    | 15     | 17    | 24     | 11   | 7     | 12     | 10     |
| 967 | 24    | 17    | 15     | 11.5  | 24     | 9    | 6     | 13     | 7      |
| 968 | 27    | 21    | 13.5   | 21    | 30     | 7    | 6     | 13     | 9      |
| 969 | 27    | 29    | 17     | 23    | 28     | 11.5 | 8     | 13     | 12     |
| 970 | 41    | 27    | 22     | 29    | 35.5   | 19   | 6     | 18     | 26.5   |
| 971 | 40    | 24    | 18     | 21    | 33     | 21.5 | 6     | 15     | 13     |
| 972 | 35    | 28    | 15     | 33    | 19     | 17   | 5     | 14     | 17     |
| 973 | 26    | 20    | 12     | 20    | 23     | 24.5 | 6     | 14     | 11.5   |
| 974 | 34    | 27    | 16     | 13    | 36     | 9    | 8     | 16     | 9      |
| 975 | 29    | 26    | 18     | 18    | 31     | 9    | 6     | 15     | 12     |
| 976 | 259   | 224   | 839    | 227   | 416    | 138  | 408.5 | 865    | 570    |
| 977 | 27    | 26    | 19     | 27    | 32     | 15   | 9     | 27     | 34     |
| 978 | 30    | 31    | 15     | 23    | 27     | 9    | 6     | 14     | 10     |
| 979 | 46.5  | 34    | 22     | 21    | 26     | 16   | 23    | 14     | 16     |
| 980 | 28.5  | 22    | 17     | 29    | 24     | 11.5 | 7     | 13     | 52.5   |
| 981 | 45    | 40    | 21     | 15    | 41.5   | 9    | 7     | 19     | 25     |
| 982 | 29.5  | 24    | 17     | 12    | 31.5   | 10   | 19    | 14     | 10     |
| 983 | 483   | 431.5 | 3012.5 | 208   | 914.5  | 309  | 757.5 | 1266   | 1266.5 |
| 984 | 36    | 25    | 15     | 18    | 26     | 14   | 5     | 12     | 59     |
| 985 | 556   | 469   | 3696.5 | 230.5 | 1110   | 358  | 922   | 1389.5 | 1429   |

|      |      |      |        |      |       |       |       |      |      |
|------|------|------|--------|------|-------|-------|-------|------|------|
| 986  | 36   | 20.5 | 14.5   | 26   | 22    | 14    | 6     | 13   | 21   |
| 987  | 463  | 471  | 3456   | 182  | 951.5 | 319   | 918   | 1411 | 972  |
| 988  | 17   | 9    | 7      | 23   | 11    | 10    | 11    | 5    | 28   |
| 989  | 309  | 262  | 1092.5 | 310  | 549   | 202.5 | 539.5 | 1095 | 621  |
| 990  | 26   | 21   | 14     | 23   | 83.5  | 9     | 7     | 12   | 14   |
| 991  | 16   | 12   | 8      | 26   | 11    | 12    | 8     | 6    | 15   |
| 992  | 18   | 7    | 6      | 14   | 8     | 8     | 4     | 6    | 17   |
| 993  | 16   | 10   | 9      | 15   | 6     | 10    | 11    | 7    | 38   |
| 994  | 14   | 7    | 7      | 14   | 5     | 4     | 4     | 16   | 5    |
| 995  | 21   | 14   | 9.5    | 31   | 10    | 12    | 7     | 6    | 32   |
| 996  | 23   | 11   | 10     | 43   | 10    | 12.5  | 10    | 7    | 46   |
| 997  | 9.5  | 10   | 6      | 16   | 8     | 9     | 4     | 5    | 4    |
| 998  | 36   | 31   | 21     | 25   | 35    | 18.5  | 8     | 16   | 20   |
| 999  | 24   | 24   | 17     | 19   | 24    | 9     | 9     | 13   | 26.5 |
| 1000 | 41   | 22   | 14     | 18   | 22    | 19    | 5     | 14   | 15.5 |
| 1001 | 38   | 20   | 14     | 16   | 21    | 16    | 6     | 13   | 14.5 |
| 1002 | 30   | 18   | 13     | 20   | 20    | 13.5  | 6     | 12   | 14   |
| 1003 | 41   | 19   | 14     | 16   | 23    | 18    | 6     | 11   | 17   |
| 1004 | 28   | 27   | 15     | 25   | 25    | 12.5  | 7     | 12   | 12   |
| 1005 | 30   | 18   | 13     | 20   | 20    | 13.5  | 6     | 12   | 14   |
| 1006 | 41   | 19   | 14     | 16   | 23    | 18    | 6     | 11   | 17   |
| 1007 | 28   | 27   | 15     | 25   | 25    | 12.5  | 7     | 12   | 12   |
| 1008 | 39   | 32   | 23     | 20   | 37    | 15    | 7     | 17   | 14   |
| 1009 | 39   | 31   | 23     | 20   | 35    | 14    | 9     | 16.5 | 17   |
| 1010 | 41.5 | 32   | 22     | 18   | 38    | 15    | 7     | 17   | 34   |
| 1011 | 39   | 23   | 17     | 10   | 28    | 12    | 5     | 15   | 36.5 |
| 1012 | 30   | 24   | 17.5   | 14   | 29    | 11    | 5     | 15   | 14   |
| 1013 | 34   | 25   | 21     | 18   | 29    | 10    | 7     | 14   | 13   |
| 1014 | 29   | 29.5 | 20     | 31.5 | 32    | 8     | 6.5   | 15   | 13   |
| 1015 | 34   | 26.5 | 18.5   | 13   | 28    | 11    | 4     | 16   | 9    |
| 1016 | 32.5 | 28   | 17     | 17.5 | 29    | 12    | 5     | 16   | 17   |
| 1017 | 29   | 26   | 15     | 19   | 30    | 11    | 5     | 16   | 23   |
| 1018 | 33   | 25   | 18     | 17   | 27    | 14    | 6     | 13   | 20   |
| 1019 | 29   | 29.5 | 20     | 31.5 | 32    | 8     | 6.5   | 15   | 13   |
| 1020 | 34   | 26.5 | 18.5   | 13   | 28    | 11    | 4     | 16   | 9    |
| 1021 | 32.5 | 28   | 17     | 17.5 | 29    | 12    | 5     | 16   | 17   |
| 1022 | 29   | 26   | 15     | 19   | 30    | 11    | 5     | 16   | 23   |
| 1023 | 33   | 25   | 18     | 17   | 27    | 14    | 6     | 13   | 20   |
| 1024 | 38   | 23   | 15     | 23   | 25    | 17    | 6     | 15   | 18   |
| 1025 | 38   | 23   | 15     | 23   | 25    | 17    | 6     | 15   | 18   |
| 1026 | 32   | 33   | 20     | 28   | 33    | 11    | 8     | 16   | 29   |
| 1027 | 31   | 26   | 17     | 33   | 29    | 14    | 9     | 15   | 29   |
| 1028 | 30.5 | 21.5 | 15     | 19   | 27    | 11    | 4     | 12   | 36   |
| 1029 | 43.5 | 40.5 | 25     | 26   | 41    | 30    | 16    | 22   | 16   |
| 1030 | 63   | 22   | 14     | 15   | 26    | 14    | 6     | 15   | 20   |
| 1031 | 60   | 28.5 | 18.5   | 35   | 29    | 16    | 7     | 16   | 24   |
| 1032 | 31.5 | 23.5 | 17     | 24   | 23    | 14    | 8     | 12   | 19.5 |



|      |       |       |       |      |      |       |       |       |       |
|------|-------|-------|-------|------|------|-------|-------|-------|-------|
| 1033 | 299   | 263.5 | 989   | 265  | 510  | 181.5 | 447.5 | 987   | 629.5 |
| 1034 | 38    | 38    | 29    | 30   | 47.5 | 14    | 24    | 24    | 28    |
| 1035 | 23    | 19    | 13    | 12   | 21   | 6     | 4     | 13    | 9     |
| 1036 | 22    | 27    | 22    | 40   | 23   | 7     | 7     | 13    | 13    |
| 1037 | 32    | 31    | 20    | 21   | 32   | 14    | 8.5   | 15    | 24    |
| 1038 | 35    | 46    | 22    | 81   | 52   | 16    | 18    | 13    | 27    |
| 1039 | 84    | 53    | 34    | 63   | 65   | 80    | 35    | 15    | 37    |
| 1040 | 59    | 41.5  | 24    | 37   | 64   | 14    | 21    | 21    | 16    |
| 1041 | 29    | 10    | 8     | 19   | 8    | 14    | 4     | 7     | 7     |
| 1042 | 20    | 10.5  | 6     | 22   | 11   | 9     | 7     | 6     | 16    |
| 1043 | 31    | 8     | 5     | 18   | 8    | 14    | 6     | 5     | 10    |
| 1044 | 27    | 16    | 13    | 18   | 19   | 10    | 6     | 11    | 13.5  |
| 1045 | 27    | 16    | 13    | 18   | 19   | 10    | 6     | 11    | 13.5  |
| 1046 | 27    | 24    | 19    | 21.5 | 27.5 | 9     | 9.5   | 14    | 14    |
| 1047 | 39    | 26.5  | 19    | 19   | 31   | 14    | 6     | 16    | 22.5  |
| 1048 | 33.5  | 29    | 16    | 21.5 | 32   | 11    | 6     | 16    | 16    |
| 1049 | 32    | 24    | 16    | 22.5 | 30   | 10    | 4     | 14    | 19    |
| 1050 | 24    | 25    | 16    | 11   | 30   | 8.5   | 5     | 15    | 7     |
| 1051 | 29    | 21    | 15.5  | 16.5 | 24   | 13    | 6     | 11    | 10    |
| 1052 | 44    | 35    | 20    | 33   | 36   | 17    | 14    | 15    | 18    |
| 1053 | 46.5  | 30    | 20    | 34.5 | 33   | 46.5  | 15    | 19.5  | 34    |
| 1054 | 32    | 25    | 18    | 34   | 86   | 19    | 7     | 15    | 12    |
| 1055 | 46    | 26    | 16    | 23   | 30   | 19    | 6     | 17    | 14    |
| 1056 | 22    | 23    | 15    | 27   | 23   | 6     | 5     | 12    | 18    |
| 1057 | 290   | 272   | 932.5 | 290  | 446  | 161.5 | 466   | 1034  | 639   |
| 1058 | 50    | 34.5  | 21    | 34   | 36   | 21    | 9.5   | 18    | 24.5  |
| 1059 | 34    | 23    | 17    | 16   | 31   | 14    | 6     | 14    | 30    |
| 1060 | 24    | 20    | 14    | 20   | 31.5 | 9     | 8     | 12    | 9.5   |
| 1061 | 42    | 31    | 21    | 19   | 36   | 18    | 10    | 20    | 16    |
| 1062 | 38    | 31    | 17    | 23   | 31.5 | 20    | 7     | 15    | 18    |
| 1063 | 28    | 24    | 15    | 20   | 24   | 12.5  | 6     | 13.5  | 21    |
| 1064 | 38    | 30    | 20    | 23   | 33   | 17    | 8     | 16    | 31    |
| 1065 | 33    | 22    | 15.5  | 22   | 24   | 13.5  | 6     | 14    | 11    |
| 1066 | 41    | 21    | 16    | 29   | 28   | 19    | 6     | 14    | 17    |
| 1067 | 255.5 | 225   | 880   | 247  | 450  | 137   | 388   | 958.5 | 532   |
| 1068 | 32    | 30    | 20    | 26.5 | 38   | 10.5  | 8     | 18    | 9     |
| 1069 | 39    | 28    | 20    | 26   | 33   | 18.5  | 8     | 16    | 29    |
| 1070 | 42    | 28    | 21    | 22   | 36   | 14    | 9     | 17    | 15    |
| 1071 | 40    | 29    | 17    | 24   | 42   | 32    | 15    | 17    | 37    |
| 1072 | 30    | 26    | 28    | 12   | 35   | 10    | 36    | 13    | 26    |
| 1073 | 54    | 22    | 14    | 12   | 29   | 8     | 6     | 14    | 9     |
| 1074 | 41    | 22    | 16    | 24   | 29   | 16    | 5     | 14    | 10    |
| 1075 | 32    | 20    | 14    | 18   | 28   | 10    | 5     | 13    | 13.5  |
| 1076 | 27    | 23    | 13    | 17   | 26   | 8     | 15    | 11    | 47.5  |
| 1077 | 38    | 32    | 24    | 22   | 42   | 16    | 10    | 16    | 14    |
| 1078 | 28    | 31    | 17    | 30   | 32   | 8     | 7     | 16    | 9     |
| 1079 | 36    | 25    | 16    | 23   | 26   | 15    | 6     | 13    | 19    |

|      |       |       |        |       |      |       |        |        |      |
|------|-------|-------|--------|-------|------|-------|--------|--------|------|
| 1080 | 40    | 26    | 22     | 15    | 32   | 13.5  | 6      | 18.5   | 26   |
| 1081 | 31    | 43    | 23.5   | 52.5  | 30   | 15    | 16     | 15     | 48   |
| 1082 | 34    | 29.5  | 17     | 34    | 29   | 13    | 7      | 16     | 12   |
| 1083 | 31    | 29    | 17     | 28.5  | 27   | 15    | 7      | 14     | 22   |
| 1084 | 26    | 25    | 17     | 32    | 41.5 | 10    | 5      | 14     | 15   |
| 1085 | 22    | 12    | 7      | 21    | 8    | 10    | 6      | 6      | 23   |
| 1086 | 27    | 10    | 6      | 18    | 8    | 14    | 4      | 7      | 20   |
| 1087 | 21    | 10    | 7      | 27    | 8    | 11    | 7      | 7      | 10   |
| 1088 | 29    | 13    | 9      | 38.5  | 12   | 20    | 8      | 8      | 16.5 |
| 1089 | 16.5  | 12    | 6      | 27    | 10   | 11    | 9      | 6      | 34   |
| 1090 | 314   | 260.5 | 1100   | 279   | 532  | 177.5 | 553    | 1177   | 773  |
| 1091 | 18    | 11    | 6      | 23.5  | 34.5 | 10    | 6      | 6      | 14   |
| 1092 | 21    | 12    | 12     | 26    | 10   | 10    | 7      | 7.5    | 13   |
| 1093 | 20    | 8     | 7      | 23    | 8    | 10    | 8      | 7      | 18   |
| 1094 | 20.5  | 12    | 6      | 26    | 9    | 11    | 6      | 7      | 14   |
| 1095 | 689   | 477   | 3963   | 215.5 | 1053 | 375   | 1018.5 | 1455   | 1677 |
| 1096 | 19    | 7     | 5      | 23    | 11   | 11    | 5      | 11     | 14   |
| 1097 | 36    | 23    | 18.5   | 21    | 38.5 | 19    | 7      | 14     | 15   |
| 1098 | 596   | 471.5 | 3952   | 240   | 1074 | 375   | 962    | 1267.5 | 1505 |
| 1099 | 37    | 21.5  | 16     | 25    | 27   | 28    | 7      | 14.5   | 22   |
| 1100 | 47    | 21.5  | 14     | 24    | 24   | 28    | 7      | 14     | 15   |
| 1101 | 30    | 19    | 15     | 17    | 26   | 21    | 7      | 13     | 17   |
| 1102 | 562   | 459   | 3749.5 | 230.5 | 1009 | 391   | 879    | 1301.5 | 1423 |
| 1103 | 35    | 18.5  | 14     | 18    | 19   | 14    | 6      | 12     | 9    |
| 1104 | 562   | 459   | 3749.5 | 230.5 | 1009 | 391   | 879    | 1301.5 | 1423 |
| 1105 | 35    | 18.5  | 14     | 18    | 19   | 14    | 6      | 12     | 9    |
| 1106 | 273.5 | 277   | 1014   | 315.5 | 483  | 185   | 485.5  | 1141   | 683  |
| 1107 | 54    | 31    | 23     | 25    | 34   | 33.5  | 9      | 16     | 17   |
| 1108 | 30    | 24    | 18     | 11    | 29   | 6     | 5      | 14     | 14   |
| 1109 | 35    | 25    | 18     | 18    | 31   | 10.5  | 5      | 16     | 14   |
| 1110 | 44    | 29    | 17     | 16    | 32   | 18    | 5      | 16.5   | 9    |
| 1111 | 42    | 33    | 24     | 29    | 33   | 19    | 6      | 17     | 11   |
| 1112 | 42    | 28    | 21     | 18    | 29   | 19    | 6      | 17     | 33   |
| 1113 | 34    | 26    | 16     | 24.5  | 28   | 17    | 6      | 15     | 14   |
| 1114 | 27    | 25    | 15     | 13    | 26   | 9     | 5      | 15     | 16.5 |
| 1115 | 29    | 26.5  | 17     | 17    | 29   | 9     | 5      | 16     | 10   |
| 1116 | 35    | 25    | 18     | 18    | 31   | 10.5  | 5      | 16     | 14   |
| 1117 | 44    | 29    | 17     | 16    | 32   | 18    | 5      | 16.5   | 9    |
| 1118 | 42    | 33    | 24     | 29    | 33   | 19    | 6      | 17     | 11   |
| 1119 | 42    | 28    | 21     | 18    | 29   | 19    | 6      | 17     | 33   |
| 1120 | 34    | 26    | 16     | 24.5  | 28   | 17    | 6      | 15     | 14   |
| 1121 | 27    | 25    | 15     | 13    | 26   | 9     | 5      | 15     | 16.5 |
| 1122 | 29    | 26.5  | 17     | 17    | 29   | 9     | 5      | 16     | 10   |
| 1123 | 43    | 31.5  | 20     | 39    | 27   | 20    | 8      | 16     | 21   |
| 1124 | 38    | 22    | 27     | 21    | 26   | 18    | 7      | 15     | 19   |
| 1125 | 43    | 31.5  | 20     | 39    | 27   | 20    | 8      | 16     | 21   |
| 1126 | 38    | 22    | 27     | 21    | 26   | 18    | 7      | 15     | 19   |

|      |       |       |        |       |       |      |       |        |        |
|------|-------|-------|--------|-------|-------|------|-------|--------|--------|
| 1127 | 36    | 24    | 15     | 18.5  | 25    | 17   | 7     | 15.5   | 10     |
| 1128 | 23    | 24    | 15     | 21    | 25    | 14   | 6     | 12     | 14     |
| 1129 | 27.5  | 25    | 16     | 14    | 25    | 9    | 5     | 13     | 16     |
| 1130 | 43    | 24    | 18     | 18    | 26    | 16   | 7     | 16     | 19     |
| 1131 | 31    | 20    | 15     | 18    | 20    | 13   | 5     | 13     | 10     |
| 1132 | 27    | 18    | 14.5   | 20    | 25    | 11   | 5     | 11     | 12     |
| 1133 | 282   | 239.5 | 969    | 259   | 489.5 | 148  | 436.5 | 935    | 650.5  |
| 1134 | 516   | 568   | 2575   | 303   | 1949  | 491  | 1085  | 1580.5 | 1648.5 |
| 1135 | 48    | 37    | 23     | 30    | 35    | 15   | 10    | 16.5   | 51     |
| 1136 | 34    | 29    | 19     | 22    | 28.5  | 14   | 6     | 14     | 15     |
| 1137 | 44    | 25    | 16     | 16    | 28    | 13   | 5     | 15     | 14     |
| 1138 | 49    | 24    | 18     | 23    | 27.5  | 10   | 7.5   | 17     | 17     |
| 1139 | 479   | 417.5 | 3204   | 209.5 | 1005  | 360  | 798   | 1193.5 | 1259   |
| 1140 | 46.5  | 28    | 19     | 27    | 27    | 17   | 8.5   | 18     | 13     |
| 1141 | 68.5  | 25.5  | 16     | 11    | 34    | 14   | 24    | 16     | 7      |
| 1142 | 38.5  | 28    | 15     | 20    | 26    | 14   | 6     | 15     | 17     |
| 1143 | 27    | 23    | 15     | 13    | 25    | 9    | 4     | 13     | 9      |
| 1144 | 39    | 26    | 16     | 34    | 28    | 12.5 | 7     | 15     | 18     |
| 1145 | 39    | 26    | 18     | 23    | 28    | 15.5 | 7     | 16     | 12     |
| 1146 | 29    | 20    | 17     | 17    | 28    | 8    | 6.5   | 12     | 17     |
| 1147 | 43    | 30    | 19     | 26    | 29    | 20   | 8     | 17     | 15     |
| 1148 | 36    | 28    | 19     | 23    | 32    | 14.5 | 7     | 16     | 32     |
| 1149 | 55    | 20    | 14     | 22.5  | 21    | 17.5 | 5     | 13     | 24     |
| 1150 | 55    | 20    | 14     | 22.5  | 21    | 17.5 | 5     | 13     | 24     |
| 1151 | 34    | 31    | 18     | 28    | 35    | 15   | 8     | 15     | 49     |
| 1152 | 25    | 27    | 19     | 21    | 37    | 7    | 11    | 14     | 6      |
| 1153 | 23.5  | 24    | 14     | 25    | 23    | 9.5  | 27    | 12     | 14     |
| 1154 | 39    | 23    | 15     | 30    | 23    | 21   | 8     | 15     | 21     |
| 1155 | 33    | 22    | 18     | 27    | 29    | 11   | 5     | 14     | 16     |
| 1156 | 41    | 28    | 18     | 26    | 32    | 19   | 9     | 16     | 14     |
| 1157 | 38    | 26.5  | 19     | 43    | 24    | 21.5 | 10    | 15     | 46     |
| 1158 | 25    | 27    | 16.5   | 30    | 39    | 10   | 7     | 12     | 18     |
| 1159 | 35    | 28    | 20     | 15    | 37    | 6    | 8     | 19     | 13     |
| 1160 | 28    | 25    | 17     | 15    | 31    | 19   | 5     | 14     | 11     |
| 1161 | 26    | 28    | 13     | 45    | 32    | 11   | 4     | 14     | 13     |
| 1162 | 72    | 34    | 25     | 23    | 32    | 18   | 18    | 16     | 25     |
| 1163 | 38    | 46    | 22     | 69.5  | 35.5  | 45   | 17    | 15     | 28     |
| 1164 | 36    | 24.5  | 17     | 29    | 25    | 17.5 | 6     | 14     | 59     |
| 1165 | 31    | 26    | 18     | 21    | 26    | 12   | 7.5   | 14     | 22     |
| 1166 | 44    | 31.5  | 20     | 16    | 33    | 12   | 9     | 16     | 14.5   |
| 1167 | 31    | 27    | 20     | 21    | 34    | 14   | 9     | 18     | 23     |
| 1168 | 45.5  | 26    | 21     | 40    | 35    | 15   | 7     | 14     | 33     |
| 1169 | 24    | 22    | 14     | 12    | 46    | 9    | 16.5  | 15     | 8      |
| 1170 | 31    | 24    | 20     | 15    | 29    | 11   | 8     | 18     | 34     |
| 1171 | 643.5 | 503.5 | 3952.5 | 217   | 1238  | 417  | 1058  | 1566   | 1616.5 |
| 1172 | 31    | 13    | 11     | 30.5  | 13    | 14   | 6     | 8      | 11     |
| 1173 | 23    | 11    | 8      | 26    | 9     | 16   | 6     | 8      | 24     |

|      |       |       |        |       |        |       |        |        |        |
|------|-------|-------|--------|-------|--------|-------|--------|--------|--------|
| 1174 | 23    | 11    | 7      | 19.5  | 10     | 11    | 111.5  | 6      | 22.5   |
| 1175 | 26    | 10    | 7      | 25    | 14     | 15    | 6      | 7      | 19     |
| 1176 | 785.5 | 539.5 | 4520.5 | 261.5 | 1312   | 478   | 1160.5 | 1583   | 1915.5 |
| 1177 | 15    | 10    | 7      | 15    | 9      | 8     | 5      | 6      | 10     |
| 1178 | 27    | 10    | 6      | 23    | 16     | 9     | 6      | 7      | 12     |
| 1179 | 17.5  | 9     | 6      | 22    | 7      | 9     | 7      | 4      | 14     |
| 1180 | 17    | 8     | 7      | 11    | 9      | 16    | 6      | 6      | 13     |
| 1181 | 290   | 256   | 964    | 264   | 445    | 144   | 412    | 930    | 552.5  |
| 1182 | 30    | 23    | 14     | 41    | 29     | 14.5  | 22     | 13     | 21.5   |
| 1183 | 30    | 26    | 17.5   | 26    | 29     | 11    | 8      | 12     | 30     |
| 1184 | 40.5  | 22    | 18     | 24.5  | 23     | 17.5  | 8      | 14.5   | 13     |
| 1185 | 35    | 19.5  | 13     | 18    | 24     | 18    | 7      | 12     | 15     |
| 1186 | 40.5  | 22    | 18     | 24.5  | 23     | 17.5  | 8      | 14.5   | 13     |
| 1187 | 35    | 19.5  | 13     | 18    | 24     | 18    | 7      | 12     | 15     |
| 1188 | 42    | 30    | 25     | 22    | 34.5   | 18    | 10     | 18     | 61     |
| 1189 | 590   | 468   | 3787   | 242   | 1068   | 351   | 1012.5 | 1359.5 | 1613   |
| 1190 | 37    | 24.5  | 19     | 12    | 29     | 11    | 6      | 14     | 12     |
| 1191 | 45    | 24    | 16     | 15    | 28     | 25    | 6      | 17     | 13     |
| 1192 | 349   | 287   | 1196   | 323   | 488    | 187   | 548    | 1167   | 748.5  |
| 1193 | 349   | 287   | 1196   | 323   | 488    | 187   | 548    | 1167   | 748.5  |
| 1194 | 321   | 275   | 1135   | 300   | 580    | 190   | 524    | 1123   | 701    |
| 1195 | 33    | 28    | 19.5   | 20    | 29.5   | 11    | 6      | 15     | 24     |
| 1196 | 31    | 25    | 16     | 23.5  | 26     | 13    | 5      | 15     | 17.5   |
| 1197 | 32    | 22    | 18     | 21    | 25     | 13    | 7      | 13     | 20     |
| 1198 | 46    | 22    | 15     | 18    | 27     | 20    | 6      | 15     | 11     |
| 1199 | 35    | 22    | 18     | 18    | 22     | 13    | 5      | 13     | 11     |
| 1200 | 38    | 25    | 17     | 17.5  | 29     | 11    | 6      | 15     | 18     |
| 1201 | 56.5  | 23    | 17     | 25    | 33     | 10    | 8      | 16     | 25.5   |
| 1202 | 35.5  | 26.5  | 17     | 39    | 28     | 12.5  | 6      | 17     | 12     |
| 1203 | 28    | 22    | 17     | 11    | 22     | 10    | 8      | 12     | 11     |
| 1204 | 40    | 25    | 17     | 32    | 27     | 18.5  | 8      | 16     | 14     |
| 1205 | 40    | 32    | 22     | 32    | 36     | 13.5  | 9.5    | 17     | 14     |
| 1206 | 28    | 22    | 13     | 15.5  | 25     | 8     | 4      | 13.5   | 7      |
| 1207 | 43    | 22    | 15     | 15    | 30     | 16    | 5      | 15     | 18     |
| 1208 | 32    | 21.5  | 13     | 11    | 21     | 10    | 4      | 12     | 8      |
| 1209 | 27    | 22    | 14     | 20    | 21     | 9     | 6      | 11     | 14     |
| 1210 | 35    | 31    | 22     | 27    | 34     | 14    | 10     | 16     | 18     |
| 1211 | 43    | 26    | 16     | 22    | 31     | 27    | 6      | 15     | 33     |
| 1212 | 276   | 222   | 845.5  | 250   | 491    | 152   | 410    | 936    | 549.5  |
| 1213 | 32    | 26    | 14     | 27    | 27     | 15    | 7      | 14     | 50     |
| 1214 | 38    | 17    | 12     | 19    | 18     | 16    | 6      | 12     | 10     |
| 1215 | 38    | 17    | 12     | 19    | 18     | 16    | 6      | 12     | 10     |
| 1216 | 47.5  | 27.5  | 20     | 20    | 29.5   | 22    | 7      | 15     | 40.5   |
| 1217 | 36    | 24    | 16     | 30    | 25     | 15    | 10     | 14     | 15     |
| 1218 | 36    | 24    | 16     | 30    | 25     | 15    | 10     | 14     | 15     |
| 1219 | 43    | 20    | 15     | 10    | 24.5   | 7     | 6      | 11     | 6      |
| 1220 | 597.5 | 487   | 3838   | 223.5 | 1127.5 | 399.5 | 936    | 1301   | 1465   |

|      |      |      |      |      |      |      |      |      |      |
|------|------|------|------|------|------|------|------|------|------|
| 1221 | 35.5 | 25   | 18   | 25   | 28   | 24   | 7    | 15   | 25.5 |
| 1222 | 29   | 23   | 16   | 16   | 27   | 7    | 5    | 17   | 9    |
| 1223 | 33   | 24   | 18.5 | 40   | 26   | -1   | -1   | 14   | -1   |
| 1224 | 32   | 33.5 | 19   | 30   | 36   | 15.5 | 8    | 20   | 36.5 |
| 1225 | 31   | 42   | 27   | 50   | 40   | 15   | 10   | 17   | 20.5 |
| 1226 | 44   | 30   | 17   | 24   | 59   | 45   | 51   | 16.5 | 19   |
| 1227 | 31   | 39   | 26   | 29   | 33   | 32   | 46   | 17   | 30   |
| 1228 | 46   | 31   | 18   | 26   | 35.5 | 19   | 8    | 18   | 17   |
| 1229 | 44   | 32   | 19   | 19   | 36   | 24   | 8    | 20   | 25   |
| 1230 | 44   | 23   | 16.5 | 21   | 26   | 20   | 5    | 16   | 15   |
| 1231 | 24   | 23   | 23   | 27   | 33   | 18   | 24   | 30   | 17   |
| 1232 | 48.5 | 26   | 16   | 26   | 29   | 22.5 | 7    | 16   | 52   |
| 1233 | 36   | 20   | 15   | 25.5 | 25   | 16   | 6    | 13   | 25   |
| 1234 | 41.5 | 74   | 31   | 34   | 39   | 25   | 11   | 18   | 12   |
| 1235 | 35   | 26   | 19   | 20   | 125  | 15   | 7    | 16   | 97.5 |
| 1236 | 46   | 27   | 17   | 15   | 278  | 12   | 8    | 16   | 17.5 |
| 1237 | 42   | 23   | 21   | 27   | 26.5 | 17   | 9    | 15   | 38   |
| 1238 | 27   | 35   | 16.5 | 34   | 27   | 13   | 13   | 13   | 29   |
| 1239 | 37   | 21   | 17   | 37   | 28   | 14   | 6    | 12   | 18.5 |
| 1240 | 37   | 39   | 38.5 | 82.5 | 45.5 | 27   | 73   | 40   | 17   |
| 1241 | 49   | 43   | 22   | 40   | 41   | 44   | 14   | 18   | 116  |
| 1242 | 29   | 9    | 8    | 19.5 | 8    | 15   | 11   | 8    | 14   |
| 1243 | 15   | 8    | 10   | 23   | 7    | 10   | 5    | 6    | 10   |
| 1244 | 23   | 10   | 8    | 26   | 9    | 13   | 6    | 6    | 11   |
| 1245 | 28   | 7.5  | 8.5  | 21   | 6    | 14   | 7    | 6    | 12   |
| 1246 | 35   | 8    | 7    | 24.5 | 15   | 11   | 6    | 6    | 19   |
| 1247 | 40   | 27   | 32   | 27   | 28   | 15.5 | 6    | 17   | 18   |
| 1248 | 33   | 13   | 14.5 | 26   | 39   | 18   | 19   | 9    | 16   |
| 1249 | 33.5 | 12   | 8    | 21   | 9    | 15.5 | 5    | 8    | 9    |
| 1250 | 35   | 10   | 7    | 22   | 8    | 13   | 4.5  | 7    | 16.5 |
| 1251 | 28   | 8    | 9    | 19   | 7    | 13   | 5    | 6    | 16   |
| 1252 | 28   | 14   | 9    | 30   | 13   | 17   | 8    | 10   | 26   |
| 1253 | 20   | 14   | 8    | 29   | 13   | 10   | 8    | 9    | 22   |
| 1254 | 35   | 8    | 6    | 19   | 8    | 18   | 7    | 8    | 14   |
| 1255 | 21   | 15   | 10   | 39   | 11   | 15   | 14   | 7    | 42   |
| 1256 | 28   | 8    | 9    | 17   | 102  | 14   | 6    | 6.5  | 19   |
| 1257 | 17   | 9    | 6    | 32   | 7    | 9    | 5    | 6    | 13   |
| 1258 | 18   | 8    | 5    | 26.5 | 6    | 8    | 5    | 5    | 12   |
| 1259 | 50   | 29   | 25   | 23   | 30   | 13   | 21.5 | 13   | 13   |
| 1260 | 38   | 18   | 13   | 14   | 20   | 15   | 6    | 11   | 12   |
| 1261 | 22   | 18   | 12   | 13   | 18   | 10   | 5    | 10   | 8    |
| 1262 | 38   | 18   | 13   | 14   | 20   | 15   | 6    | 11   | 12   |
| 1263 | 22   | 18   | 12   | 13   | 18   | 10   | 5    | 10   | 8    |
| 1264 | 50   | 30   | 24   | 18   | 40.5 | 17.5 | 7    | 20   | 42   |
| 1265 | 46   | 29   | 24   | 20   | 53.5 | 12   | 10   | 16   | 25.5 |
| 1266 | 46   | 31   | 21   | 18   | 36   | 24   | 6    | 19   | 19.5 |
| 1267 | 43.5 | 28   | 19.5 | 18   | 34   | 17   | 7    | 22   | 11   |

|      |      |      |      |      |      |       |      |      |        |
|------|------|------|------|------|------|-------|------|------|--------|
| 1268 | 42   | 28   | 21   | 17   | 34   | 15    | 9    | 17   | 119.5  |
| 1269 | 50   | 25   | 20   | 18   | 32   | 11    | 8    | 15   | 13     |
| 1270 | 41.5 | 24   | 17.5 | 24   | 30   | 15    | 6    | 17   | 13     |
| 1271 | 41.5 | 24   | 17.5 | 24   | 30   | 15    | 6    | 17   | 13     |
| 1272 | 37   | 32   | 19   | 23   | 32   | 12.5  | 7    | 16   | 24     |
| 1273 | 47   | 29   | 23   | 36   | 31.5 | 17    | 7    | 14   | 24     |
| 1274 | 43.5 | 27.5 | 18   | 35.5 | 27.5 | 13.5  | 6    | 16   | 11     |
| 1275 | 37   | 27   | 18   | 26   | 29.5 | 15    | 9    | 14   | 37     |
| 1276 | 45   | 22.5 | 16   | 18   | 25   | 16    | 5    | 15   | 20     |
| 1277 | 30   | 20   | 13   | 23   | 24   | 10    | 3.5  | 11   | 10     |
| 1278 | 38.5 | 35   | 21   | 26   | 37   | 17    | 11   | 16   | 19     |
| 1279 | 35   | 30   | 21   | 17   | 33   | 12    | 6    | 17   | 20     |
| 1280 | 32.5 | 31.5 | 22   | 31   | 30   | 12    | 9    | 16   | 26     |
| 1281 | 31   | 23   | 16   | 20   | 25   | 9     | 11   | 13.5 | 11     |
| 1282 | 43   | 31.5 | 20   | 22   | 35.5 | 15    | 8    | 15   | 19     |
| 1283 | 36   | 23   | 40   | 21   | 24   | 12    | 5    | 13   | 11     |
| 1284 | 49.5 | 22   | 14   | 24   | 23   | 22    | 5    | 13   | 10     |
| 1285 | 20   | 22   | 13   | 29   | 23   | 5     | 6    | 11   | 13     |
| 1286 | 45.5 | 31.5 | 16   | 24   | 28.5 | 55    | 3    | 30   | 9.5    |
| 1287 | 32   | 13   | 15   | 32   | 27   | 13    | 8    | 8    | 24     |
| 1288 | 16   | 9    | 8    | 18   | 10   | 10    | 7    | 6    | 13     |
| 1289 | 52   | 29   | 21   | 22.5 | 35   | 24    | 6    | 19   | 36     |
| 1290 | 44   | 30   | 21   | 18.5 | 33   | 9     | 6    | 17   | 17     |
| 1291 | 44   | 30   | 21   | 18.5 | 33   | 9     | 6    | 17   | 17     |
| 1292 | 40   | 21.5 | 16   | 24   | 24   | 23    | 6    | 12   | 12     |
| 1293 | 36   | 22   | 15   | 16   | 22.5 | 13    | 11   | 16   | 25     |
| 1294 | 326  | 259  | 1077 | 255  | 497  | 179   | 475  | 922  | 582.5  |
| 1295 | 27   | 23.5 | 14   | 22.5 | 26   | 8     | 5    | 13   | 10     |
| 1296 | 30   | 24.5 | 18   | 16   | 24   | 6     | 5    | 13   | 11     |
| 1297 | 39.5 | 27   | 15.5 | 15   | 30   | 10    | 4    | 13   | 15     |
| 1298 | 30.5 | 20   | 14   | 25   | 32   | 6     | 12   | 11   | 13     |
| 1299 | 44   | 25   | 16   | 37   | 23.5 | 30    | 8    | 14   | 13     |
| 1300 | 30   | 31   | 15   | 41   | 22   | 7.5   | 5    | 12   | 25.5   |
| 1301 | 28.5 | 12   | 9    | 16   | 14   | 20    | 6    | 11   | 8      |
| 1302 | 46.5 | 27   | 17.5 | 28.5 | 29   | 18    | 8    | 17   | 24     |
| 1303 | 30   | 20   | 15   | 19   | 21   | 11.5  | 6.5  | 12   | 8      |
| 1304 | 40   | 25   | 15   | 25   | 24   | 22    | 7    | 13.5 | 12     |
| 1305 | 44   | 22   | 18   | 30.5 | 22   | 20    | 7    | 16   | 20     |
| 1306 | 81   | 36   | 26   | 27   | 40   | 11    | 14   | 18   | 11     |
| 1307 | 41   | 34   | 25   | 37   | 34   | 13    | 17.5 | 16   | 20     |
| 1308 | 29.5 | 27   | 17   | 17   | 28   | 8     | 9    | 15   | 13     |
| 1309 | 36   | 28   | 20   | 34   | 36   | 14    | 8    | 17   | 25     |
| 1310 | 34.5 | 25   | 21   | 21   | 33   | 12    | 6    | 14.5 | 18     |
| 1311 | 49.5 | 21   | 16   | 15   | 25   | 8     | 5    | 14   | 12     |
| 1312 | 659  | 470  | 4151 | 244  | 1167 | 384.5 | 1029 | 1319 | 1723.5 |
| 1313 | 40   | 29   | 21   | 23   | 33   | 17    | 7    | 18   | 44     |
| 1314 | 54   | 24   | 17   | 29   | 26.5 | 20    | 12   | 15   | 15     |

|      |       |       |      |       |      |       |        |        |        |
|------|-------|-------|------|-------|------|-------|--------|--------|--------|
| 1315 | 30.5  | 21    | 12   | 12    | 21   | 10    | 7      | 12     | 9      |
| 1316 | 25    | 8     | 6    | 18    | 7    | 11    | 5      | 7      | 12     |
| 1317 | 35    | 30    | 17   | 17    | 32.5 | 14    | 10     | 14     | 15     |
| 1318 | 777   | 559   | 4970 | 303.5 | 1373 | 510   | 1226.5 | 1668.5 | 1874   |
| 1319 | 38    | 92.5  | 21   | 46.5  | 29.5 | 17.5  | 9      | 15     | 10     |
| 1320 | 39    | 28    | 19   | 41    | 32   | 17    | 8.5    | 41.5   | 19     |
| 1321 | 51    | 15    | 10   | 21    | 13   | 27    | 6      | 9      | 8      |
| 1322 | 42    | 14    | 7    | 27    | 13   | 19    | 6      | 10     | 19     |
| 1323 | 26    | 9.5   | 9    | 23    | 10   | 13    | 63.5   | 8      | 11     |
| 1324 | 28    | 12    | 9    | 25    | 11   | 11    | 6      | 7      | 9      |
| 1325 | 23    | 13    | 9    | 29    | 10   | 13.5  | 5      | 6      | 24     |
| 1326 | 40    | 14    | 8    | 24    | 12   | 25    | 7      | 9      | 37     |
| 1327 | 20    | 8     | 5    | 12    | 10   | 5     | 4      | 5      | 12     |
| 1328 | 22    | 9     | 8    | 27    | 9.5  | 10    | 5      | 6      | 9      |
| 1329 | 41    | 11    | 8    | 24    | 14   | 25    | 7      | 9      | 13     |
| 1330 | 22    | 7     | 10   | 22    | 5    | 8     | 5      | 4      | 13     |
| 1331 | 50    | 28    | 19   | 24    | 34   | 31.5  | 7      | 17     | 45     |
| 1332 | 36    | 22    | 18   | 21    | 24.5 | 21    | 7      | 13     | 37     |
| 1333 | 36.5  | 19    | 19.5 | 19    | 24.5 | 18    | 10     | 13     | 20     |
| 1334 | 36.5  | 19    | 19.5 | 19    | 24.5 | 18    | 10     | 13     | 20     |
| 1335 | 346   | 292.5 | 1222 | 311   | 565  | 222.5 | 567    | 1169   | 811    |
| 1336 | 42.5  | 31    | 24   | 21    | 39   | 15    | 7      | 33     | 28     |
| 1337 | 46    | 30.5  | 21   | 22    | 31   | 21    | 7      | 18     | 23     |
| 1338 | 39    | 36.5  | 44   | 42    | 45   | 23    | 13     | 17     | 22     |
| 1339 | 49.5  | 25    | 18   | 18    | 27   | 17    | 6      | 16.5   | 18     |
| 1340 | 66    | 30    | 18   | 27    | 30   | 21    | 6      | 18     | 23     |
| 1341 | 38    | 32    | 20   | 38    | 28   | 14    | 6      | 30     | 13     |
| 1342 | 51    | 29    | 16   | 25.5  | 29   | 20    | 5      | 16     | 14     |
| 1343 | 41    | 31    | 16   | 18    | 29   | 17    | 7      | 15     | 12     |
| 1344 | 66    | 30    | 18   | 27    | 30   | 21    | 6      | 18     | 23     |
| 1345 | 38    | 32    | 20   | 38    | 28   | 14    | 6      | 30     | 13     |
| 1346 | 51    | 29    | 16   | 25.5  | 29   | 20    | 5      | 16     | 14     |
| 1347 | 41    | 31    | 16   | 18    | 29   | 17    | 7      | 15     | 12     |
| 1348 | 32    | 22    | 14   | 22    | 25   | 10    | 5      | 11     | 14     |
| 1349 | 32    | 22    | 14   | 22    | 25   | 10    | 5      | 11     | 14     |
| 1350 | 34.5  | 31    | 21   | 22.5  | 33   | 12    | 5.5    | 15     | 14     |
| 1351 | 34    | 27    | 19   | 34    | 28   | 11.5  | 8      | 15     | 23     |
| 1352 | 690.5 | 517   | 4163 | 254   | 1348 | 463   | 1096   | 1461.5 | 1756.5 |
| 1353 | 31    | 21    | 14   | 20    | 26   | 11    | 5      | 13     | 11     |
| 1354 | 41    | 31    | 19   | 24    | 32   | 15.5  | 7      | 16     | 37     |
| 1355 | 30    | 28    | 18   | 23    | 28   | 11    | 16     | 13     | 34     |
| 1356 | 53    | 26    | 20   | 25.5  | 27   | 15    | 8.5    | 14     | 23     |
| 1357 | 70    | 27    | 20   | 32    | 35   | 20.5  | 9      | 17     | 40     |
| 1358 | 31    | 17    | 13   | 14    | 21   | 8     | 4      | 10     | 12     |
| 1359 | 52.5  | 53    | 27   | 43    | 37   | 34    | 104    | 19     | 25     |
| 1360 | 45    | 35    | 26   | 26    | 37   | 12    | 8      | 16     | 19     |
| 1361 | 34    | 28.5  | 21   | 26    | 37   | 15    | 9      | 17     | 24     |

|      |      |      |        |      |        |      |       |      |        |
|------|------|------|--------|------|--------|------|-------|------|--------|
| 1362 | 38   | 24   | 22     | 22   | 28     | 18   | 7     | 16   | 12     |
| 1363 | 34   | 26.5 | 15     | 12   | 30     | 14   | 7     | 15   | 26     |
| 1364 | 28   | 21   | 15     | 22   | 20     | 13.5 | 8     | 13   | 21     |
| 1365 | 28   | 21   | 15     | 22   | 20     | 13.5 | 8     | 13   | 21     |
| 1366 | 38   | 32   | 23     | 16.5 | 41     | 10   | 7     | 20.5 | 14     |
| 1367 | 46   | 24   | 17     | 27   | 28     | 17   | 6     | 15   | 12     |
| 1368 | 46   | 24   | 17     | 27   | 28     | 17   | 6     | 15   | 12     |
| 1369 | 36   | 33   | 18     | 25   | 31     | 10.5 | 8     | 16   | 16     |
| 1370 | 43   | 30   | 18     | 44   | 24     | 15   | 7     | 13.5 | 14     |
| 1371 | 44   | 23   | 17     | 26.5 | 27.5   | 28   | 8     | 14   | 12     |
| 1372 | 87   | 34.5 | 20     | 55.5 | 27     | 26   | 10    | 14   | 51     |
| 1373 | 54   | 34   | 21     | 28.5 | 51     | 19   | 26    | 20.5 | 23     |
| 1374 | 41   | 30   | 19     | 87   | 44     | 17.5 | 9     | 17   | 12     |
| 1375 | 37   | 23   | 15     | 20   | 28     | 9    | 7     | 15   | 15     |
| 1376 | 655  | 483  | 3767.5 | 248  | 995.5  | 397  | 991.5 | 1329 | 1578   |
| 1377 | 54   | 28.5 | 16     | 32   | 30     | 26.5 | 7.5   | 17   | 30     |
| 1378 | 52   | 40   | 20.5   | 42.5 | 32     | 23   | 7     | 17   | 28     |
| 1379 | 29.5 | 27   | 21     | 39   | 51     | 10   | 7     | 12   | 22     |
| 1380 | 39   | 35   | 43     | 50   | 50     | 12   | 12    | 19   | 21     |
| 1381 | 45   | 28   | 18     | 24   | 32     | 18   | 8     | 18   | 27.5   |
| 1382 | 34   | 29.5 | 17     | 18   | 29     | 13   | 10    | 16   | 12     |
| 1383 | 43.5 | 28   | 27     | 17   | 39     | 15.5 | 9     | 16   | 17     |
| 1384 | 60   | 28   | 20     | 28   | 29     | 25   | 10    | 21   | 18     |
| 1385 | 42.5 | 25   | 17     | 27   | 24     | 14.5 | 6     | 14   | 18.5   |
| 1386 | 549  | 452  | 3496.5 | 225  | 1106.5 | 344  | 902   | 1412 | 1295.5 |
| 1387 | 33   | 29   | 16     | 29.5 | 32     | 13.5 | 7.5   | 14   | 22     |
| 1388 | 47   | 23   | 15     | 17   | 25     | 19   | 18    | 14   | 23     |
| 1389 | 46   | 24   | 22     | 25   | 22     | 21   | 8     | 14   | 12.5   |
| 1390 | 48   | 40   | 20.5   | 26   | 38     | 17.5 | 8     | 18   | 19.5   |
| 1391 | 51   | 29   | 21     | 21   | 33     | 15   | 10    | 16   | 11     |
| 1392 | 41   | 23.5 | 16     | 26   | 34     | 16   | 6     | 14   | 13     |
| 1393 | 50   | 28   | 20     | 32   | 30     | 18   | 7     | 16   | 18     |
| 1394 | 15   | 8    | 6      | 14   | 7      | 7    | 7     | 6    | 13     |
| 1395 | 17   | 6    | 5      | 22   | 7      | 8    | 4     | 5    | 8      |
| 1396 | 31   | 15   | 8      | 27   | 10     | 17   | 7     | 9    | 10     |
| 1397 | 32   | 24   | 16.5   | 68   | 69     | 13   | 8     | 12   | 15     |
| 1398 | 37   | 22.5 | 15     | 20   | 27     | 13   | 6     | 12   | 15     |
| 1399 | 40   | 22   | 15     | 17   | 23     | 17   | 5     | 13   | 29.5   |
| 1400 | 48   | 19   | 17     | 19   | 23     | 23   | 6     | 17   | 17     |
| 1401 | 33   | 20   | 13     | 16   | 21     | 13   | 5     | 11   | 22.5   |
| 1402 | 54   | 25   | 14     | 25   | 24     | 29   | 6     | 15   | 27     |
| 1403 | 48   | 22   | 18     | 23   | 22.5   | 32   | 6     | 14.5 | 10     |
| 1404 | 48   | 25   | 16     | 28.5 | 26     | 22   | 7     | 13   | 19     |
| 1405 | 35   | 18.5 | 13.5   | 21   | 19.5   | 13.5 | 6     | 11   | 12     |
| 1406 | 37   | 20   | 14     | 19   | 23     | 19.5 | 8     | 13   | 19     |
| 1407 | 44   | 20   | 15     | 22   | 20     | 27   | 7     | 14   | 22     |
| 1408 | 48   | 22   | 18     | 23   | 22.5   | 32   | 6     | 14.5 | 10     |



|      |      |      |      |      |       |      |      |      |      |
|------|------|------|------|------|-------|------|------|------|------|
| 1409 | 48   | 25   | 16   | 28.5 | 26    | 22   | 7    | 13   | 19   |
| 1410 | 35   | 18.5 | 13.5 | 21   | 19.5  | 13.5 | 6    | 11   | 12   |
| 1411 | 37   | 20   | 14   | 19   | 23    | 19.5 | 8    | 13   | 19   |
| 1412 | 44   | 20   | 15   | 22   | 20    | 27   | 7    | 14   | 22   |
| 1413 | 63.5 | 35   | 25   | 22   | 43.5  | 20   | 10   | 19   | 22.5 |
| 1414 | 51   | 26   | 19   | 19   | 31    | 20   | 7    | 19   | 11   |
| 1415 | 51   | 26   | 19   | 19   | 31    | 20   | 7    | 19   | 11   |
| 1416 | 31   | 22.5 | 15   | 23   | 25    | 14   | 6    | 15   | 10   |
| 1417 | 31   | 22.5 | 15   | 23   | 25    | 14   | 6    | 15   | 10   |
| 1418 | 31   | 35.5 | 18   | 31   | 40.5  | 14.5 | 8    | 15   | 21   |
| 1419 | 42   | 20   | 14   | 19   | 23    | 16   | 5    | 13.5 | 22   |
| 1420 | 42.5 | 24   | 17   | 23   | 28    | 16   | 6    | 15   | 14   |
| 1421 | 38   | 29   | 19   | 25   | 30    | 14   | 7    | 15   | 35   |
| 1422 | 57.5 | 29   | 17   | 24   | 28    | 16   | 13   | 15   | 25   |
| 1423 | 73   | 25   | 18   | 19   | 26.5  | 24   | 8    | 18   | 18   |
| 1424 | 39   | 25   | 16   | 12   | 28    | 20.5 | 4    | 16   | 10   |
| 1425 | 31   | 23   | 13   | 23   | 30    | 9    | 32   | 12.5 | 18   |
| 1426 | 42   | 29.5 | 20   | 36   | 37    | 14   | 9    | 17   | 23   |
| 1427 | 13   | 9    | 9    | 5.5  | 2.5   | 7.5  | 0    | 17.5 | 2    |
| 1428 | 59   | 28   | 22   | 18   | 36    | 25   | 7    | 19   | 21   |
| 1429 | 45   | 37   | 20   | 27   | 38    | 20   | 11   | 18   | 28   |
| 1430 | 39   | 33   | 19   | 26   | 32    | 29   | 10.5 | 21.5 | 35   |
| 1431 | 37.5 | 25   | 22   | 20   | 33    | 15   | 10.5 | 12   | 15   |
| 1432 | 42   | 33.5 | 19   | 29   | 29    | 19   | 14.5 | 14   | 16   |
| 1433 | 33   | 25   | 17   | 30   | 26    | 21   | 8    | 16   | 26   |
| 1434 | 53   | 30   | 23   | 32   | 37    | 33   | 6    | 16   | 31   |
| 1435 | 50.5 | 30   | 20   | 39   | 35.5  | 30   | 8    | 18   | 24   |
| 1436 | 41   | 30   | 19   | 44   | 39    | 32   | 24   | 18   | 23   |
| 1437 | 42   | 30   | 21   | 24   | 36    | 21   | 8    | 16   | 35   |
| 1438 | 55   | 25   | 24   | 25   | 30    | 26   | 7    | 16   | 49.5 |
| 1439 | 48.5 | 40   | 23   | 41   | 103.5 | 23   | 17   | 18.5 | 32   |
| 1440 | 52   | 23   | 20   | 24   | 29    | 36   | 8    | 17   | 18   |
| 1441 | 50   | 27   | 18   | 31   | 38    | 23   | 8    | 17   | 23   |
| 1442 | 52   | 30   | 16.5 | 35   | 26    | 34.5 | 7    | 13   | 23   |
| 1443 | 45   | 25   | 16   | 26   | 24    | 25.5 | 7    | 12.5 | 13   |
| 1444 | 42.5 | 20   | 17   | 21   | 29    | 20   | 8    | 13   | 12   |
| 1445 | 45.5 | 22   | 13   | 26   | 26    | 23   | 8    | 13   | 37   |
| 1446 | 49   | 29.5 | 20   | 23   | 30    | 16   | 14   | 15   | 20   |
| 1447 | 36   | 22.5 | 19   | 11   | 31    | 8    | 5.5  | 14   | 13   |
| 1448 | 48   | 26   | 18   | 26   | 51    | 15   | 10   | 14   | 11   |
| 1449 | 55   | 56   | 18   | 26   | 44    | 17   | 18   | 16.5 | 9    |
| 1450 | 61   | 24   | 16   | 25   | 26    | 26   | 10   | 17   | 18   |
| 1451 | 47   | 22   | 16   | 21.5 | 40.5  | 21   | 7    | 17   | 17   |
| 1452 | 42   | 24   | 17   | 27   | 26    | 16   | 7    | 14   | 17   |
| 1453 | 51   | 22   | 15   | 17   | 23    | 20   | 6    | 16   | 10   |
| 1454 | 41   | 27   | 22   | 22   | 26    | 15   | 8    | 16   | 21   |
| 1455 | 42   | 23   | 21   | 32   | 26    | 19   | 20.5 | 16   | 35   |

|      |      |      |      |      |        |      |      |      |      |
|------|------|------|------|------|--------|------|------|------|------|
| 1456 | 30   | 12   | 10   | 29   | 25     | 17   | 10   | 6    | 15   |
| 1457 | 26   | 5    | 4    | 11   | 5      | 13.5 | 3    | 5    | 9    |
| 1458 | 24   | 25   | 15   | 18   | 28     | 7    | 11   | 15   | 13   |
| 1459 | 36   | 13   | 9.5  | 26   | 13     | 15   | 7    | 10   | 22.5 |
| 1460 | 44   | 10.5 | 7    | 23   | 8      | 18   | 4    | 7    | 15   |
| 1461 | 510  | 462  | 3545 | 184  | 951.5  | 295  | 967  | 1444 | 950  |
| 1462 | 37.5 | 9    | 8    | 15   | 25     | 13   | 9    | 6    | 6    |
| 1463 | 43   | 24   | 17.5 | 9    | 30     | 9    | 26   | 15   | 9    |
| 1464 | 35   | 28   | 16   | 68   | 22     | 11.5 | 6    | 13   | 11   |
| 1465 | 67.5 | 21.5 | 16   | 25   | 25     | 36   | 8    | 14.5 | 22   |
| 1466 | 43.5 | 24   | 17   | 31.5 | 25     | 23   | 8    | 13   | 27   |
| 1467 | 28   | 24   | 18   | 19   | 22     | 12   | 7    | 12   | 15   |
| 1468 | 52   | 22   | 13   | 24.5 | 24     | 37   | 5    | 16.5 | 20   |
| 1469 | 42.5 | 20   | 16   | 25   | 22     | 23   | 10   | 14   | 18   |
| 1470 | 35   | 22   | 14   | 21   | 23     | 20   | 6    | 13   | 15   |
| 1471 | 41   | 21   | 16   | 21   | 22     | 20   | 6    | 14   | 12.5 |
| 1472 | 42.5 | 20   | 16   | 25   | 22     | 23   | 10   | 14   | 18   |
| 1473 | 35   | 22   | 14   | 21   | 23     | 20   | 6    | 13   | 15   |
| 1474 | 41   | 21   | 16   | 21   | 22     | 20   | 6    | 14   | 12.5 |
| 1475 | 58   | 34   | 25   | 17   | 37     | 23   | 8    | 17   | 15   |
| 1476 | 57.5 | 35   | 35   | 30   | 38     | 31   | 8    | 24   | 22   |
| 1477 | 56   | 31   | 21   | 23   | 35     | 24   | 8    | 18   | 31   |
| 1478 | 36   | 30   | 21.5 | 22   | 45     | 18   | 8    | 17   | 47.5 |
| 1479 | 56   | 29   | 19   | 15   | 34     | 21   | 7    | 17   | 13   |
| 1480 | 37   | 27.5 | 21   | 25   | 29     | 15   | 9    | 16   | 17   |
| 1481 | 32   | 26   | 18   | 14   | 27     | 8    | 4    | 16   | 18   |
| 1482 | 114  | 24   | 19   | 13   | 34     | 41   | 5    | 16   | 9    |
| 1483 | 55   | 24   | 19   | 16   | 33     | 22.5 | 7    | 15   | 16   |
| 1484 | 36   | 25.5 | 19   | 21   | 27     | 11   | 6    | 15.5 | 14   |
| 1485 | 45   | 22   | 14.5 | 20   | 21     | 20   | 6    | 15   | 17   |
| 1486 | 45   | 22   | 14.5 | 20   | 21     | 20   | 6    | 15   | 17   |
| 1487 | 36   | 29   | 20   | 27   | 35     | 12   | 7    | 15   | 16   |
| 1488 | 42   | 28   | 24   | 52   | 28     | 17   | 7    | 16   | 15   |
| 1489 | 42   | 24   | 21   | 23   | 29.5   | 18   | 8    | 21   | 45   |
| 1490 | 57   | 23   | 17   | 20   | 30     | 18   | 6    | 16   | 15   |
| 1491 | 44   | 20   | 15   | 20   | 26     | 17   | 5    | 13   | 11   |
| 1492 | 39   | 22   | 15   | 22   | 24     | 19   | 5    | 13   | 12   |
| 1493 | 722  | 511  | 3855 | 246  | 1255.5 | 447  | 1025 | 1425 | 1613 |
| 1494 | 69   | 25   | 15   | 13   | 26     | 15   | 7    | 15   | 22   |
| 1495 | 62   | 26   | 16   | 29   | 25     | 23   | 6    | 18   | 12   |
| 1496 | 46   | 44.5 | 37   | 39   | 59     | 19   | 37   | 31   | 39.5 |
| 1497 | 56.5 | 31   | 22   | 40.5 | 29     | 21   | 10   | 20   | 29   |
| 1498 | 57   | 30   | 20   | 22   | 34     | 28.5 | 9    | 21   | 21   |
| 1499 | 39   | 30   | 27   | 31   | 43     | 18   | 9    | 16   | 16.5 |
| 1500 | 22   | 16   | 14   | 11   | 22     | 6    | 6    | 12   | 5    |
| 1501 | 55   | 27   | 25   | 32   | 33     | 24   | 9    | 15   | 27   |
| 1502 | 78.5 | 25.5 | 17   | 17   | 29     | 35   | 6    | 17   | 23   |

|      |       |       |      |      |        |       |        |      |        |
|------|-------|-------|------|------|--------|-------|--------|------|--------|
| 1503 | 46    | 33    | 19   | 47   | 34     | 15.5  | 6      | 17   | 12     |
| 1504 | 46    | 33    | 19   | 47   | 34     | 15.5  | 6      | 17   | 12     |
| 1505 | 29    | 26    | 15   | 25   | 35     | 9     | 4.5    | 13   | 20     |
| 1506 | 29    | 26    | 15   | 25   | 35     | 9     | 4.5    | 13   | 20     |
| 1507 | 35    | 24.5  | 17   | 22   | 27.5   | 15    | 8      | 15   | 14     |
| 1508 | 40    | 25    | 15   | 27   | 25     | 13    | 5      | 14   | 15     |
| 1509 | 49    | 34    | 21   | 27   | 44     | 27    | 8      | 18   | 67     |
| 1510 | 35    | 23    | 13   | 19   | 24     | 8     | 7      | 12   | 13     |
| 1511 | 45    | 27    | 19   | 29   | 42     | 21    | 9      | 17.5 | 20     |
| 1512 | 40.5  | 46.5  | 24   | 65   | 27     | 17    | 29.5   | 17   | 15.5   |
| 1513 | 666   | 525.5 | 3993 | 241  | 1175.5 | 434.5 | 1009   | 1482 | 1630.5 |
| 1514 | 52    | 27    | 19   | 29   | 35     | 24    | 7      | 18   | 13     |
| 1515 | 696.5 | 519   | 4097 | 260  | 1139   | 462   | 1092.5 | 1562 | 1791.5 |
| 1516 | 55    | 25    | 18   | 25   | 31.5   | 29    | 9      | 16   | 15     |
| 1517 | 35    | 26    | 16   | 24   | 25.5   | 29    | 7      | 14   | 19     |
| 1518 | 45    | 24    | 18   | 22   | 25     | 28    | 7      | 16   | 14     |
| 1519 | 35.5  | 32    | 18   | 36   | 34     | 15.5  | 10     | 14   | 14     |
| 1520 | 589   | 473   | 3369 | 229  | 1037   | 399   | 984    | 1441 | 1465   |
| 1521 | 36    | 30    | 22   | 30   | 38     | 9.5   | 12     | 18   | 21     |
| 1522 | -1    | 26    | 14   | 26   | 45.5   | 21    | -1     | 12   | 27     |
| 1523 | 54    | 27    | 18   | 25   | 31     | 15.5  | 7      | 15   | 26     |
| 1524 | 44.5  | 25    | 19   | 13   | 30     | 19    | 11     | 14   | 63     |
| 1525 | 53.5  | 24    | 21   | 24   | 30     | 26    | 7      | 18   | 24     |
| 1526 | 27.5  | 22    | 19   | 37   | 23     | 12    | 9      | 10   | 12     |
| 1527 | 26    | 8.5   | 6    | 21   | 19     | 11    | 6      | 5.5  | 12     |
| 1528 | 38    | 114.5 | 21   | 34   | 58     | 18    | 33     | 18   | 22     |
| 1529 | 48    | 29.5  | 19   | 41.5 | 30     | 25    | 8      | 16   | 35     |
| 1530 | 20    | 10    | 9    | 27   | 7      | 8     | 6      | 6    | 30     |
| 1531 | 42    | 10    | 7    | 25   | 11     | 24    | 6      | 8    | 19     |
| 1532 | 28    | 18.5  | 7    | 35   | 10     | 16    | 14     | 7    | 19     |
| 1533 | 18    | 14    | 12.5 | 39   | 12     | 11    | 7      | 16   | 43     |
| 1534 | 38    | 10    | 7    | 24   | 12     | 14    | 8      | 7    | 13     |
| 1535 | 18    | 16    | 19   | 47.5 | 12     | 9     | 21     | 6    | 15     |
| 1536 | 38    | 10    | 7    | 25   | 7      | 29    | 6      | 9    | 14     |
| 1537 | 29    | 4.5   | 5    | 13   | 6      | 14    | 4      | 5.5  | 6      |
| 1538 | 44.5  | 20    | 12   | 19   | 22.5   | 27    | 6      | 15   | 11     |
| 1539 | 44.5  | 20    | 12   | 19   | 22.5   | 27    | 6      | 15   | 11     |
| 1540 | 38    | 35    | 22   | 17   | 37     | 13    | 7      | 19   | 19     |
| 1541 | 56.5  | 35    | 27   | 23   | 39     | 24    | 9      | 20   | 17     |
| 1542 | 61    | 32    | 29   | 24   | 37     | 30    | 8      | 18   | 22     |
| 1543 | 53    | 45    | 25.5 | 19   | 38     | 23    | 7      | 19   | 17     |
| 1544 | 53    | 27    | 23   | 23   | 33     | 20    | 16     | 16   | 16     |
| 1545 | 43    | 29.5  | 20   | 20   | 34     | 18    | 5.5    | 19   | 16     |
| 1546 | 56    | 29    | 17   | 24   | 32     | 22    | 6      | 17   | 12     |
| 1547 | 47    | 25.5  | 20   | 25   | 32.5   | 10    | 7      | 15   | 25     |
| 1548 | 36    | 29    | 15   | 21   | 30     | 16    | 5      | 16   | 15     |
| 1549 | 42    | 29    | 19   | 20   | 30     | 14    | 6      | 17   | 20     |

|      |      |       |      |      |      |       |        |        |        |
|------|------|-------|------|------|------|-------|--------|--------|--------|
| 1550 | 35   | 23.5  | 16   | 13   | 27   | 11    | 5      | 15     | 11     |
| 1551 | 49   | 28    | 17   | 20   | 29   | 24    | 7      | 18     | 14     |
| 1552 | 46   | 25    | 16   | 24   | 28   | 14    | 5      | 16     | 16     |
| 1553 | 43   | 29.5  | 20   | 20   | 34   | 18    | 5.5    | 19     | 16     |
| 1554 | 56   | 29    | 17   | 24   | 32   | 22    | 6      | 17     | 12     |
| 1555 | 47   | 25.5  | 20   | 25   | 32.5 | 10    | 7      | 15     | 25     |
| 1556 | 36   | 29    | 15   | 21   | 30   | 16    | 5      | 16     | 15     |
| 1557 | 42   | 29    | 19   | 20   | 30   | 14    | 6      | 17     | 20     |
| 1558 | 35   | 23.5  | 16   | 13   | 27   | 11    | 5      | 15     | 11     |
| 1559 | 49   | 28    | 17   | 20   | 29   | 24    | 7      | 18     | 14     |
| 1560 | 46   | 25    | 16   | 24   | 28   | 14    | 5      | 16     | 16     |
| 1561 | 844  | 566   | 4847 | 300  | 1261 | 527.5 | 1258.5 | 1638.5 | 2061.5 |
| 1562 | 46   | 22    | 15   | 36   | 23   | 17    | 6      | 18     | 18     |
| 1563 | 844  | 566   | 4847 | 300  | 1261 | 527.5 | 1258.5 | 1638.5 | 2061.5 |
| 1564 | 46   | 22    | 15   | 36   | 23   | 17    | 6      | 18     | 18     |
| 1565 | 696  | 545.5 | 4126 | 258  | 1317 | 447.5 | 1135   | 1541   | 1653.5 |
| 1566 | 40   | 33.5  | 24   | 26   | 30   | 13    | 8      | 16     | 18     |
| 1567 | 49   | 28    | 20   | 26   | 34   | 17.5  | 7      | 17     | 15     |
| 1568 | 30   | 31    | 23   | 23   | 29.5 | 8     | 18     | 15     | 17     |
| 1569 | 54.5 | 27    | 16   | 26   | 29   | 25    | 6      | 17     | 17     |
| 1570 | 46   | 35    | 22   | 36   | 37   | 25    | 8      | 16     | 58     |
| 1571 | 37   | 9     | 7    | 21   | 6    | 16    | 7      | 8      | 10     |
| 1572 | 51.5 | 29    | 21   | 39   | 31   | 46    | 17     | 17.5   | 27     |
| 1573 | 48.5 | 30.5  | 17   | 29   | 26   | 42    | 21     | 15     | 48.5   |
| 1574 | 51.5 | 29    | 21   | 39   | 31   | 46    | 17     | 17.5   | 27     |
| 1575 | 48.5 | 30.5  | 17   | 29   | 26   | 42    | 21     | 15     | 48.5   |
| 1576 | 58   | 29    | 21   | 16.5 | 35   | 25    | 9      | 19.5   | 18     |
| 1577 | 51   | 29    | 19   | 24   | 33   | 23.5  | 7      | 15     | 33.5   |
| 1578 | 24   | 20    | 15   | 24.5 | 23.5 | 7     | 8      | 12     | 10     |
| 1579 | 53   | 27.5  | 19   | 25   | 35   | 27    | 7      | 18     | 15     |
| 1580 | 52   | 29    | 16   | 30   | 32   | 25    | 6      | 17     | 14     |
| 1581 | 46   | 19    | 20   | 26   | 22   | 19    | 9      | 13     | 34     |
| 1582 | 49   | 24    | 16   | 37.5 | 23   | 31.5  | 7      | 15     | 26     |
| 1583 | 34   | 26    | 14   | 35   | 34   | 10    | 6      | 12.5   | 25     |
| 1584 | 36.5 | 28    | 18   | 29   | 31   | 16    | 8      | 16     | 18     |
| 1585 | 44   | 27.5  | 19   | 24   | 28   | 19    | 9      | 19     | 24     |
| 1586 | 28   | 24    | 19   | 11   | 43.5 | 9     | 6      | 15     | 12     |
| 1587 | 42.5 | 24    | 15   | 24   | 28   | 19    | 7      | 16     | 27     |
| 1588 | 50   | 30    | 23   | 26.5 | 41   | 22    | 10     | 18     | 17     |
| 1589 | 59   | 43    | 30   | 24   | 47   | 12    | 8      | 21     | 46     |
| 1590 | 55   | 25.5  | 16   | 26   | 31   | 23    | 8      | 16     | 17     |
| 1591 | 58.5 | 23    | 16.5 | 36   | 25.5 | 26    | 8      | 15     | 19     |
| 1592 | 40   | 28.5  | 16   | 17.5 | 25   | 16.5  | 6      | 14     | 49     |
| 1593 | 27   | 26.5  | 17   | 26   | 28   | 10    | 6      | 13     | 14     |
| 1594 | 57   | 32    | 18   | 27   | 29   | 27.5  | 6      | 16     | 36     |
| 1595 | 32   | 27    | 19   | 23   | 29   | 21    | 18     | 16     | 24     |
| 1596 | 55   | 28    | 19   | 32   | 31.5 | 25    | 9      | 18     | 15     |

|      |      |       |        |      |        |      |      |        |        |
|------|------|-------|--------|------|--------|------|------|--------|--------|
| 1597 | 49.5 | 29    | 19     | 27   | 79     | 26   | 12   | 19     | 28     |
| 1598 | 36   | 28    | 19     | 22   | 34     | 15   | 14   | 15     | 22     |
| 1599 | 21   | 8     | 5      | 23   | 7      | 6    | 4    | 5      | 38     |
| 1600 | 37   | 14    | 12     | 25   | 13     | 19   | 9    | 10     | 24.5   |
| 1601 | 26   | 14.5  | 13     | 30   | 12     | 12   | 9.5  | 7      | 15     |
| 1602 | 35   | 8.5   | 6      | 18   | 7      | 13   | 5    | 7      | 11     |
| 1603 | 40   | 22.5  | 14     | 24   | 28     | 21   | 10   | 14     | 24.5   |
| 1604 | 43   | 19    | 13.5   | 17   | 23     | 21   | 7    | 13     | 16     |
| 1605 | 41   | 19    | 16     | 21   | 21     | 24.5 | 7.5  | 12     | 12     |
| 1606 | 41   | 19    | 16     | 21   | 21     | 24.5 | 7.5  | 12     | 12     |
| 1607 | 37   | 29    | 21.5   | 17   | 33     | 16.5 | 8    | 17     | 16     |
| 1608 | 58   | 27    | 23     | 17   | 32     | 23   | 14   | 15     | 43     |
| 1609 | 43   | 25    | 17     | 14   | 31     | 17   | 5    | 16     | 13     |
| 1610 | 54.5 | 34    | 24.5   | 22   | 39     | 20   | 9    | 20     | 14     |
| 1611 | 54.5 | 34    | 24.5   | 22   | 39     | 20   | 9    | 20     | 14     |
| 1612 | 34   | 30    | 16     | 34.5 | 24     | 9    | 6    | 14     | 13     |
| 1613 | 50   | 22    | 16     | 24   | 28.5   | 17   | 7    | 15     | 11     |
| 1614 | 34   | 30    | 16     | 34.5 | 24     | 9    | 6    | 14     | 13     |
| 1615 | 50   | 22    | 16     | 24   | 28.5   | 17   | 7    | 15     | 11     |
| 1616 | 30   | 28    | 20     | 22   | 34     | 9.5  | 6    | 16     | 19     |
| 1617 | 50   | 28    | 19     | 23   | 290    | 23.5 | 6    | 17     | 17     |
| 1618 | 47   | 29.5  | 21     | 30   | 43     | 17   | 8    | 18     | 20     |
| 1619 | 652  | 515.5 | 4068.5 | 240  | 1133   | 402  | 969  | 1457.5 | 1586.5 |
| 1620 | 32   | 21    | 15     | 11   | 26     | 10   | 5    | 14     | 12     |
| 1621 | 29.5 | 21    | 15     | 8    | 22.5   | 8.5  | 4.5  | 12     | 10     |
| 1622 | 53   | 60    | 16     | 112  | 24.5   | 20   | 15.5 | 16     | 33     |
| 1623 | 51   | 30    | 18     | 27   | 29     | 26   | 10   | 16     | 21     |
| 1624 | 40   | 8     | 8      | 21   | 6      | 24   | 6    | 9      | 19     |
| 1625 | 18   | 8     | 6      | 21   | 28     | 10.5 | 5    | 6      | 10     |
| 1626 | 35   | 11    | 5      | 23   | 13     | 16   | 7    | 7      | 12     |
| 1627 | 33   | 21    | 16     | 21   | 26     | 14   | 7    | 13     | 22     |
| 1628 | 65   | 34    | 24     | 23   | 35     | 29   | 7    | 19     | 36     |
| 1629 | 56   | 26    | 20     | 16   | 32     | 32.5 | 6    | 18     | 15     |
| 1630 | 39   | 24    | 18     | 14.5 | 27     | 17   | 7    | 15     | 12.5   |
| 1631 | 44.5 | 29    | 21     | 25   | 39     | 17   | 16   | 21     | 18     |
| 1632 | 25   | 26    | 18     | 26.5 | 213    | 8    | 13.5 | 15     | 14     |
| 1633 | 93   | 23    | 16     | 15   | 27     | 10   | 5    | 16     | 22     |
| 1634 | 49   | 29    | 16     | 37   | 31     | 25   | 10   | 21     | 19     |
| 1635 | 652  | 468   | 3648   | 236  | 1001   | 359  | 975  | 1355   | 1567   |
| 1636 | 55   | 31    | 22     | 28   | 33     | 21   | 9    | 17     | 18     |
| 1637 | 52   | 29.5  | 20     | 24   | 36     | 23.5 | 9    | 17     | 17.5   |
| 1638 | 53   | 30    | 22     | 31   | 35.5   | 22   | 8    | 17     | 40     |
| 1639 | 67   | 24    | 16     | 28   | 27     | 43   | 8    | 16.5   | 26     |
| 1640 | 38.5 | 23.5  | 20     | 23   | 25     | 17   | 7    | 13     | 19     |
| 1641 | 575  | 487   | 3440   | 212  | 1061.5 | 368  | 919  | 1428.5 | 1386   |
| 1642 | 45   | 28    | 16     | 24   | 33     | 18.5 | 24   | 17     | 17     |
| 1643 | 67   | 21.5  | 15     | 23   | 28     | 26.5 | 7    | 37     | 15     |

|      |       |      |      |      |      |      |      |      |      |
|------|-------|------|------|------|------|------|------|------|------|
| 1644 | 60    | 24   | 18   | 22   | 29   | 26   | 7    | 19   | 15   |
| 1645 | 160   | 36   | 23   | 28   | 37   | 23   | 10   | 20   | 26   |
| 1646 | 36    | 31   | 25   | 42   | 91   | 23   | 15   | 15   | 13   |
| 1647 | 29.5  | 43   | 15   | 23   | 27   | 13   | 11   | 16   | 9    |
| 1648 | 42    | 22   | 15   | 22   | 28   | 15.5 | 6    | 14   | 14   |
| 1649 | 49.5  | 27   | 19   | 27   | 28.5 | 21   | 10   | 17   | 29   |
| 1650 | 23    | 16   | 15   | 12   | 25   | 7    | 7    | 12   | 5    |
| 1651 | 41    | 29.5 | 20   | 31   | 28   | 15   | 16   | 17   | 51   |
| 1652 | 46    | 25   | 17   | 33   | 32   | 21   | 9    | 14   | 16   |
| 1653 | 57.5  | 32   | 25.5 | 41   | 49   | 21   | 12   | 18   | 22   |
| 1654 | 84    | 32.5 | 20   | 53   | 33   | 13   | 11   | 17   | 23   |
| 1655 | 52    | 24   | 17   | 33   | 24   | 22.5 | 8    | 16   | 14   |
| 1656 | 114.5 | 32.5 | 22   | 19   | 35   | 14   | 13   | 17   | 15.5 |
| 1657 | 38    | 25   | 17   | 18   | 26   | 7    | 7    | 14   | 13.5 |
| 1658 | 46    | 11   | 10   | 29   | 11   | 20   | 11   | 9    | 15   |
| 1659 | 23    | 12   | 11   | 24   | 8    | 10   | 6    | 7    | 17   |
| 1660 | 45.5  | 10   | 8    | 21   | 324  | 20   | 5.5  | 8    | 15   |
| 1661 | 40    | 13   | 8    | 30.5 | 12   | 20   | 8.5  | 9    | 16   |
| 1662 | 42    | 27   | 16   | 23   | 30   | 16   | 18   | 17   | 25   |
| 1663 | 45    | 21.5 | 14.5 | 22   | 31   | 25   | 8    | 15.5 | 20   |
| 1664 | 63    | 22   | 16   | 25   | 28   | 30   | 7    | 16   | 15.5 |
| 1665 | 50.5  | 22   | 20   | 30   | 24   | 25   | 6    | 14   | 20   |
| 1666 | 48.5  | 21   | 15   | 21   | 24   | 31   | 7    | 12   | 18   |
| 1667 | 50.5  | 22   | 20   | 30   | 24   | 25   | 6    | 14   | 20   |
| 1668 | 48.5  | 21   | 15   | 21   | 24   | 31   | 7    | 12   | 18   |
| 1669 | 55    | 31   | 26   | 23   | 42.5 | 24   | 8    | 19   | 29   |
| 1670 | 50    | 35   | 23   | 22   | 33   | 20   | 7    | 18   | 31   |
| 1671 | 44    | 28   | 20.5 | 21   | 36   | 18   | 7    | 16   | 40   |
| 1672 | 45    | 30   | 17.5 | 21   | 32   | 16   | 7    | 18   | 28   |
| 1673 | 45    | 30   | 17.5 | 21   | 32   | 16   | 7    | 18   | 28   |
| 1674 | 66.5  | 31   | 20.5 | 27   | 41.5 | 24   | 8    | 18.5 | 39.5 |
| 1675 | 42    | 35.5 | 24   | 38.5 | 38   | 15   | 8    | 17   | 17   |
| 1676 | 51    | 29   | 18   | 24.5 | 31.5 | 22   | 7    | 17   | 21   |
| 1677 | 65    | 26   | 35   | 20   | 30   | 21.5 | 6    | 17   | 23   |
| 1678 | 35    | 56   | 21   | 56.5 | 38.5 | 18   | 18.5 | 21   | 28   |
| 1679 | 28    | 25   | 14   | 28   | 25   | 7    | 7    | 12   | 12   |
| 1680 | 54.5  | 33   | 23   | 38   | 37.5 | 31   | 11   | 22   | 41   |
| 1681 | 41    | 42   | 22   | 89   | 29   | 11   | 37.5 | 15   | 19   |
| 1682 | 50.5  | 26   | 19   | 25   | 31.5 | 19   | 8    | 16   | 14   |
| 1683 | 35    | 12   | 10   | 30   | 10   | 7    | 7    | 7    | 10   |
| 1684 | 40    | 12   | 8    | 26   | 10   | 22   | 7    | 9    | 10   |
| 1685 | 51.5  | 21   | 17   | 25.5 | 24   | 29   | 6    | 15   | 18   |
| 1686 | 51.5  | 21   | 17   | 25.5 | 24   | 29   | 6    | 15   | 18   |
| 1687 | 53    | 31.5 | 20   | 27   | 33   | 23.5 | 18   | 16   | 39   |
| 1688 | 32    | 32   | 21   | 32   | 34   | 18   | 23   | 14   | 37.5 |
| 1689 | 54    | 25   | 15   | 26   | 26   | 30.5 | 7    | 16   | 17   |
| 1690 | 30    | 27   | 18   | 33   | 27   | 14   | 10   | 15.5 | 19   |

|      |       |      |      |      |       |       |      |      |      |
|------|-------|------|------|------|-------|-------|------|------|------|
| 1691 | 32    | 25   | 16   | 26   | 33    | 16    | 8    | 16   | 13   |
| 1692 | 56    | 37   | 38   | 42.5 | 115   | 22    | 15.5 | 30.5 | 17.5 |
| 1693 | 33.5  | 23   | 19   | 54   | 199.5 | 13    | 51   | 14   | 21   |
| 1694 | 56    | 28   | 20   | 20   | 36    | 24    | 9    | 20   | 27   |
| 1695 | 45    | 29.5 | 20   | 33   | 30    | 24    | 8    | 16.5 | 28   |
| 1696 | 35    | 42   | 48   | 35   | 33    | 30    | 35   | 27   | 41   |
| 1697 | 62.5  | 33   | 21   | 34   | 35.5  | 31.5  | 9.5  | 19   | 24   |
| 1698 | 40    | 29   | 20   | 35   | 41    | 12.5  | 9    | 13   | 37   |
| 1699 | 46.5  | 22   | 15   | 22.5 | 26    | 19    | 7    | 14   | 15   |
| 1700 | 31    | 20.5 | 18   | 24   | 29    | 17    | 6.5  | 11   | 16   |
| 1701 | 40    | 28   | 19   | 27   | 31    | 16    | 7.5  | 15   | 26   |
| 1702 | 45    | 24   | 18   | 27   | 28    | 18    | 9    | 15   | 24   |
| 1703 | 46    | 22.5 | 19   | 25   | 25.5  | 14    | 8    | 13   | 45   |
| 1704 | 48    | 27   | 18   | 31   | 31    | 19    | 7    | 17   | 15   |
| 1705 | 68    | 43   | 27   | 36.5 | 54.5  | 30    | 11   | 25   | 32   |
| 1706 | 37    | 24   | 21   | 14   | 28    | 12    | 10   | 13   | 16   |
| 1707 | 32    | 22   | 19   | 15   | 24    | 9.5   | 5    | 11   | 71.5 |
| 1708 | 837   | 600  | 4797 | 299  | 1414  | 555.5 | 1227 | 1658 | 1943 |
| 1709 | 38    | 32   | 25   | 37   | 41    | 21    | 42   | 24   | 39   |
| 1710 | 43    | 12   | 10   | 23   | 13    | 16    | 8    | 10   | 27   |
| 1711 | 35    | 12   | 7.5  | 18   | 16    | 17    | 7    | 7    | 28   |
| 1712 | 101.5 | 10   | 19.5 | 27.5 | 16    | 18    | 10   | 7    | 12   |
| 1713 | 38    | 10   | 10   | 29.5 | 8     | 18    | 8    | 9    | 12   |
| 1714 | 36    | 9    | 6    | 23   | 6     | 24    | 7    | 9    | 18   |
| 1715 | 48    | 11   | 8    | 24   | 7.5   | 29    | 7    | 12   | 11   |
| 1716 | 21    | 6    | 5    | 15   | 12    | 9.5   | 4    | 5    | 10   |
| 1717 | 43    | 22   | 15.5 | 23   | 26    | 15    | 49.5 | 13   | 21   |
| 1718 | 49.5  | 20   | 15   | 15   | 23    | 26    | 6    | 15   | 12   |
| 1719 | 54    | 33   | 23   | 18   | 46    | 19    | 7    | 19   | 15   |
| 1720 | 67    | 33.5 | 24   | 20   | 34    | 17    | 9    | 17.5 | 14   |
| 1721 | 59    | 29   | 32   | 25   | 114.5 | 28    | 7    | 18   | 29   |
| 1722 | 60    | 27   | 22   | 19   | 32    | 25    | 7    | 17   | 21   |
| 1723 | 57    | 31   | 19   | 28   | 28.5  | 26    | 8    | 16   | 17   |
| 1724 | 72    | 24   | 15.5 | 31   | 26    | 32    | 7    | 21   | 12   |
| 1725 | 50.5  | 22   | 17   | 23   | 25    | 20    | 5    | 15   | 12   |
| 1726 | 35    | 22   | 17   | 24.5 | 22    | 10    | 7    | 13   | 17   |
| 1727 | 57    | 31   | 19   | 28   | 28.5  | 26    | 8    | 16   | 17   |
| 1728 | 72    | 24   | 15.5 | 31   | 26    | 32    | 7    | 21   | 12   |
| 1729 | 50.5  | 22   | 17   | 23   | 25    | 20    | 5    | 15   | 12   |
| 1730 | 35    | 22   | 17   | 24.5 | 22    | 10    | 7    | 13   | 17   |
| 1731 | 49    | 28   | 18   | 26   | 34    | 21    | 7    | 19   | 35   |
| 1732 | 46    | 26   | 19   | 21   | 30    | 16    | 6    | 16   | 77   |
| 1733 | 58    | 24   | 17   | 27.5 | 28    | 25    | 8    | 16   | 42   |
| 1734 | 63    | 39   | 23   | 35   | 85    | 25    | 10   | 21   | 31   |
| 1735 | 66    | 39   | 26   | 32   | 37    | 30.5  | 10   | 24   | 40   |
| 1736 | 34    | 22   | 15   | 15   | 21    | 8     | 5    | 11   | 11   |
| 1737 | 30    | 26   | 15   | 25.5 | 23    | 9     | 8    | 13   | 26.5 |

|      |       |      |        |       |        |       |      |        |        |
|------|-------|------|--------|-------|--------|-------|------|--------|--------|
| 1738 | 713.5 | 482  | 4001   | 246   | 1225   | 451   | 1039 | 1380   | 1582   |
| 1739 | 37    | 30   | 19     | 30    | 41     | 17    | 7    | 20     | 45     |
| 1740 | 61    | 24   | 25     | 28    | 32     | 26    | 8    | 18     | 19     |
| 1741 | 62    | 24   | 23     | 24    | 39     | 25.5  | 6.5  | 16     | 16     |
| 1742 | 43    | 26   | 17     | 20    | 61     | 18    | 11   | 14     | 24     |
| 1743 | 32    | 13   | 7      | 18    | 19     | 14    | 5    | 7.5    | 16     |
| 1744 | 43.5  | 24   | 22     | 26    | 27     | 16    | 8    | 15     | 22     |
| 1745 | 63    | 30   | 21     | 21.5  | 31     | 28    | 7    | 21     | 28     |
| 1746 | 52    | 36   | 19     | 25    | 34.5   | 19.5  | 9    | 19     | 18     |
| 1747 | 52    | 36   | 19     | 25    | 34.5   | 19.5  | 9    | 19     | 18     |
| 1748 | 37    | 21   | 28     | 9     | 26     | 12    | 5    | 12     | 25     |
| 1749 | 73.5  | 32   | 20.5   | 32    | 33.5   | 25    | 10   | 19     | 23.5   |
| 1750 | 64.5  | 37   | 27     | 51    | 42     | 24.5  | 18   | 22.5   | 31     |
| 1751 | 43    | 29   | 28.5   | 27    | 34.5   | 28.5  | 8    | 18     | 30     |
| 1752 | 52    | 23   | 16.5   | 33    | 25     | 28    | 8    | 15.5   | 31     |
| 1753 | 63    | 29   | 19     | 33    | 37     | 29.5  | 9    | 17.5   | 18.5   |
| 1754 | 41    | 38   | 37     | 35    | 34     | 33    | 34   | 35     | 47     |
| 1755 | 38    | 41   | 27     | 62    | 44.5   | 19    | 13   | 15     | 63     |
| 1756 | 58    | 32   | 18     | 25    | 37     | 27    | 8    | 18.5   | 14     |
| 1757 | 64    | 28.5 | 18     | 35    | 34.5   | 31    | 9    | 17.5   | 52     |
| 1758 | 51.5  | 23   | 18     | 21    | 27     | 22    | 8    | 17     | 19     |
| 1759 | 61    | 30   | 20     | 21    | 41     | 21    | 6    | 18     | 35.5   |
| 1760 | 57    | 26   | 17.5   | 28    | 27     | 20    | 6    | 15     | 13     |
| 1761 | 42    | 24   | 15     | 18    | 22     | 16    | 6    | 15     | 20     |
| 1762 | 64    | 22.5 | 18     | 34    | 30     | 30.5  | 10.5 | 18     | 25     |
| 1763 | 31    | 27   | 22     | 18    | 28     | 13    | 7    | 13     | 11     |
| 1764 | 48.5  | 28   | 16     | 43.5  | 28     | 18    | 7    | 15     | 17     |
| 1765 | 49    | 24   | 17     | 24    | 26     | 23    | 12.5 | 16     | 13     |
| 1766 | 57    | 15   | 10     | 30    | 12     | 24    | 8    | 10     | 16     |
| 1767 | 25    | 12   | 10     | 32    | 11     | 17    | 8    | 11     | 16.5   |
| 1768 | 693   | 517  | 3633   | 237   | 1136.5 | 448.5 | 1050 | 1437.5 | 1466.5 |
| 1769 | 38    | 24   | 16.5   | 21    | 32     | 12    | 9    | 15     | 13     |
| 1770 | 56    | 20.5 | 16     | 20    | 22.5   | 39    | 7    | 13     | 19     |
| 1771 | 42    | 25   | 16     | 21    | 20     | 18    | 6    | 11     | 22     |
| 1772 | 51.5  | 22   | 16     | 28.5  | 21     | 23    | 8    | 14     | 16     |
| 1773 | 55    | 19   | 29     | 29.5  | 25     | 30    | 9    | 15.5   | 21.5   |
| 1774 | 42    | 25   | 16     | 21    | 20     | 18    | 6    | 11     | 22     |
| 1775 | 51.5  | 22   | 16     | 28.5  | 21     | 23    | 8    | 14     | 16     |
| 1776 | 55    | 19   | 29     | 29.5  | 25     | 30    | 9    | 15.5   | 21.5   |
| 1777 | 636   | 591  | 4235.5 | 261.5 | 1186.5 | 487.5 | 1099 | 1589.5 | 1697   |
| 1778 | 55.5  | 37   | 27     | 25    | 41     | 21    | 10   | 20.5   | 14     |
| 1779 | 62    | 31   | 23.5   | 18    | 34.5   | 30    | 8    | 19     | 15     |
| 1780 | 56    | 40   | 26     | 32.5  | 39     | 22    | 9    | 21     | 15     |
| 1781 | 56    | 40   | 26     | 32.5  | 39     | 22    | 9    | 21     | 15     |
| 1782 | 30    | 23   | 15.5   | 26    | 24     | 9     | 5    | 12     | 13     |
| 1783 | 30    | 23   | 15.5   | 26    | 24     | 9     | 5    | 12     | 13     |
| 1784 | 49    | 31   | 24     | 27    | 33     | 23    | 7.5  | 18     | 15     |



|      |      |      |      |      |      |      |      |    |      |
|------|------|------|------|------|------|------|------|----|------|
| 1785 | 52   | 29   | 19   | 25   | 44   | 17   | 9    | 17 | 18   |
| 1786 | 60   | 23   | 15   | 29   | 27   | 29   | 6    | 17 | 16   |
| 1787 | 43   | 32.5 | 22   | 29.5 | 35   | 14   | 10.5 | 16 | 25   |
| 1788 | 52   | 27   | 22   | 46.5 | 33   | 22   | 10   | 16 | 38   |
| 1789 | 39   | 31   | 15   | 64.5 | 28.5 | 13   | 6    | 14 | 9    |
| 1790 | 30   | 26   | 16   | 23   | 25   | 12   | 7    | 14 | 11   |
| 1791 | 63   | 20   | 15   | 22   | 28   | 31   | 7    | 16 | 14   |
| 1792 | 38   | 24   | 20   | 32   | 27   | 19   | 7    | 13 | 17   |
| 1793 | 59.5 | 29   | 21   | 32.5 | 30   | 30   | 11   | 22 | 21   |
| 1794 | 50   | 26   | 19   | 24   | 25.5 | 25   | 8    | 18 | 38   |
| 1795 | 30   | 26   | 17   | 43.5 | 24   | 9    | 7    | 14 | 17   |
| 1796 | 30   | 26   | 17   | 43.5 | 24   | 9    | 7    | 14 | 17   |
| 1797 | 54   | 29   | 22   | 23   | 37   | 23   | 8    | 19 | 20   |
| 1798 | 42   | 20   | 18   | 19   | 26   | 19   | 6    | 12 | 10.5 |
| 1799 | 49   | 34   | 26   | 44   | 39.5 | 25.5 | 13   | 17 | 27   |
| 1800 | 70.5 | 31   | 21   | 44   | 34   | 39   | 9    | 21 | 16   |
| 1801 | 56   | 30   | 18   | 46   | 30   | 27   | 11   | 16 | 38   |
| 1802 | 37   | 35.5 | 19   | 70   | 64   | 18   | 12   | 17 | 102  |
| 1803 | 60   | 27   | 18   | 38   | 31   | 30   | 9    | 21 | 23   |
| 1804 | 53   | 25   | 18   | 27   | 27.5 | 25   | 7    | 15 | 55   |
| 1805 | 48.5 | 23   | 18   | 28   | 24   | 24.5 | 7.5  | 16 | 13   |
| 1806 | 37   | 23   | 13   | 17   | 24   | 15   | 9    | 13 | 13.5 |
| 1807 | 39   | 59   | 24   | 23   | 35   | 18   | 10   | 17 | 19.5 |
| 1808 | 66   | 30   | 21   | 26   | 37   | 20   | 9    | 19 | 31   |
| 1809 | 36   | 30   | 17   | 47   | 34   | 14   | 10   | 15 | 57   |
| 1810 | 36   | 58.5 | 24   | 26   | 49   | 13   | 12   | 16 | 28   |
| 1811 | 35   | 19   | 16   | 20   | 27   | 14   | 10   | 13 | 11   |
| 1812 | 48   | 24   | 17   | 21   | 24.5 | 18   | 8    | 17 | 23.5 |
| 1813 | 73.5 | 33   | 23.5 | 30   | 35   | 47   | 34   | 16 | 18   |
| 1814 | 28   | 10   | 7    | 24.5 | 8    | 8    | 5    | 6  | 47   |
| 1815 | 81   | 13   | 9    | 32   | 14   | 43   | 7    | 13 | 52   |
| 1816 | 36   | 10   | 7    | 22   | 14.5 | 19   | 6    | 7  | 15   |
| 1817 | 31   | 9    | 6    | 22   | 9    | 13   | 5    | 6  | 9    |
| 1818 | 33.5 | 8.5  | 8    | 22   | 9    | 21   | 7    | 9  | 17.5 |
| 1819 | 64   | 35   | 20   | 21.5 | 40   | 30.5 | 9    | 18 | 21   |
| 1820 | 51.5 | 21.5 | 16   | 30   | 23   | 24   | 8    | 13 | 15   |
| 1821 | 57   | 24   | 16   | 26   | 25   | 32   | 13   | 15 | 20.5 |
| 1822 | 39   | 19   | 14   | 24   | 20   | 16   | 6    | 12 | 27   |
| 1823 | 44   | 25   | 15.5 | 31   | 24   | 27   | 7    | 17 | 15.5 |
| 1824 | 39   | 21   | 15   | 16   | 23   | 17   | 6    | 13 | 18   |
| 1825 | 54.5 | 21   | 16   | 29   | 25   | 30   | 7    | 15 | 31   |
| 1826 | 30   | 19   | 17   | 22   | 21   | 16   | 5    | 12 | 17   |
| 1827 | 58   | 20   | 16   | 19   | 28   | 29   | 6    | 12 | 17   |
| 1828 | 22   | 20   | 14   | 9    | 18   | 8    | 5    | 12 | 13   |
| 1829 | 39   | 21   | 15   | 16   | 23   | 17   | 6    | 13 | 18   |
| 1830 | 54.5 | 21   | 16   | 29   | 25   | 30   | 7    | 15 | 31   |
| 1831 | 30   | 19   | 17   | 22   | 21   | 16   | 5    | 12 | 17   |

|      |      |      |      |      |      |       |      |      |      |
|------|------|------|------|------|------|-------|------|------|------|
| 1832 | 58   | 20   | 16   | 19   | 28   | 29    | 6    | 12   | 17   |
| 1833 | 22   | 20   | 14   | 9    | 18   | 8     | 5    | 12   | 13   |
| 1834 | 74   | 36.5 | 24   | 19   | 37.5 | 35    | 8    | 20   | 16   |
| 1835 | 43.5 | 25   | 17   | 13   | 30   | 13    | 6    | 16   | 19   |
| 1836 | 61   | 29   | 22   | 20   | 34   | 28    | 7.5  | 20   | 17   |
| 1837 | 38   | 27   | 17.5 | 28   | 36   | 13    | 10   | 16   | 20   |
| 1838 | 46   | 29   | 32   | 24   | 28   | 18    | 13   | 15   | 20   |
| 1839 | 61   | 25   | 18.5 | 28   | 28   | 28.5  | 8    | 15   | 15   |
| 1840 | 52   | 21   | 15   | 23   | 24   | 21    | 7    | 15   | 17   |
| 1841 | 71.5 | 25   | 20   | 23   | 27   | 19    | 8    | 16   | 26   |
| 1842 | 75   | 27   | 20   | 37   | 42   | 27    | 7    | 19   | 14   |
| 1843 | 54   | 26   | 20   | 35   | 45   | 25    | 9    | 18   | 19   |
| 1844 | 63   | 24   | 16   | 22   | 26   | 31.5  | 8    | 14   | 12   |
| 1845 | 56   | 24   | 17   | 26   | 28   | 37    | 7    | 16.5 | 17   |
| 1846 | 69   | 34   | 22   | 28   | 36   | 30    | 9    | 20   | 17   |
| 1847 | 53   | 26   | 17   | 18   | 29.5 | 17    | 7    | 15   | 53   |
| 1848 | 47.5 | 23   | 20   | 30.5 | 30   | 16    | 10   | 13   | 38   |
| 1849 | 40   | 8    | 6    | 24   | 10   | 20    | 5    | 10   | 38   |
| 1850 | 79   | 57   | 28   | 36   | 58   | 35    | 26   | 22   | 31   |
| 1851 | 54   | 13   | 8    | 33.5 | 15.5 | 23.5  | 7    | 9    | 28   |
| 1852 | 89   | 38   | 21   | 38   | 42   | 33.5  | 11   | 20   | 79   |
| 1853 | 28   | 27.5 | 18   | 23   | 28   | 16    | 19   | 15   | 30   |
| 1854 | 35   | 22   | 17   | 30   | 30   | 12    | 6    | 12   | 11   |
| 1855 | 59   | 28   | 18   | 35   | 31   | 28    | 12   | 18   | 20   |
| 1856 | 35   | 58   | 20   | 57.5 | 39   | 12    | 12   | 13   | 102  |
| 1857 | 46   | 30   | 19   | 14   | 37   | 9.5   | 5.5  | 17   | 14   |
| 1858 | 112  | 28   | 16   | 14   | 40   | 33    | 7    | 15   | 16   |
| 1859 | 60   | 31   | 21   | 27   | 38   | 35    | 10   | 22   | 19   |
| 1860 | 65   | 33   | 20   | 35   | 41   | 34    | 9    | 22   | 19   |
| 1861 | 48   | 28   | 18   | 22   | 30   | 20    | 8    | 17   | 25   |
| 1862 | 56.5 | 28   | 21   | 34   | 28   | 28.5  | 10   | 16   | 30   |
| 1863 | 58   | 23   | 18   | 22   | 55   | 31    | 7    | 15   | 14   |
| 1864 | 774  | 531  | 4076 | 242  | 1166 | 436.5 | 1048 | 1515 | 1730 |
| 1865 | 32   | 20   | 14   | 26   | 23   | 14    | 7    | 16   | 23   |
| 1866 | 38.5 | 26   | 16   | 19   | 27   | 12    | 16   | 13   | 9    |
| 1867 | 75.5 | 26   | 17   | 26   | 25   | 34    | 8    | 16   | 38   |
| 1868 | 52   | 31   | 21   | 23   | 31   | 21    | 7    | 16.5 | 26   |
| 1869 | 62   | 25   | 19   | 27.5 | 24.5 | 23.5  | 12   | 17   | 24   |
| 1870 | 102  | 39.5 | 31.5 | 48   | 44   | 37    | 12   | 25   | 37   |
| 1871 | 32   | 11   | 9    | 27   | 9    | 14    | 9    | 6    | 9    |
| 1872 | 33   | 9    | 7    | 19   | 18   | 12    | 4    | 5    | 12   |
| 1873 | 870  | 572  | 4688 | 251  | 1326 | 504   | 1278 | 1742 | 2024 |
| 1874 | 23   | 14   | 12   | 31   | 10   | 10    | 11   | 6    | 16   |
| 1875 | 26   | 9    | 6    | 25   | 10   | 12    | 6    | 6    | 34   |
| 1876 | 48   | 8    | 31   | 15   | 25   | 13    | 9    | 5    | 5    |
| 1877 | 20   | 41   | 27.5 | 45   | 7    | 31    | 34   | 13   | 62   |
| 1878 | 64   | 27   | 19   | 29   | 35   | 37    | 7    | 20   | 21.5 |

|      |      |      |      |      |      |      |      |      |      |
|------|------|------|------|------|------|------|------|------|------|
| 1879 | 65   | 22   | 16   | 24   | 24   | 31   | 9    | 16   | 18   |
| 1880 | 49   | 22.5 | 18   | 21   | 21.5 | 21   | 7    | 14   | 13   |
| 1881 | 58   | 24   | 15   | 26   | 22   | 27   | 8    | 15   | 15   |
| 1882 | 58   | 24   | 15   | 26   | 22   | 27   | 8    | 15   | 15   |
| 1883 | 67   | 33   | 27   | 22   | 38   | 30.5 | 8    | 20   | 17   |
| 1884 | 65   | 39   | 30   | 39   | 45   | 34.5 | 12   | 21.5 | 67   |
| 1885 | 56   | 32   | 26.5 | 24   | 41   | 17   | 7    | 19   | 20   |
| 1886 | 88   | 35   | 26   | 24   | 38   | 25   | 10   | 22   | 44   |
| 1887 | 54   | 21   | 18   | 13   | 26   | 26   | 6    | 18   | 14   |
| 1888 | 36   | 25   | 20   | 21   | 32   | 9    | 14   | 15   | 22   |
| 1889 | 65   | 29   | 22.5 | 20   | 31   | 25   | 7    | 17   | 30   |
| 1890 | 48   | 28   | 22.5 | 17.5 | 35   | 17   | 7    | 18   | 10   |
| 1891 | 55   | 33   | 22.5 | 28   | 37   | 23   | 8    | 21   | 29   |
| 1892 | 58.5 | 35   | 25   | 31   | 37   | 28.5 | 8    | 22   | 18   |
| 1893 | 62   | 36   | 21   | 35   | 46   | 25   | 8    | 19   | 13   |
| 1894 | 40   | 31.5 | 21   | 22   | 45.5 | 13   | 7    | 17   | 21   |
| 1895 | 48   | 28   | 22.5 | 17.5 | 35   | 17   | 7    | 18   | 10   |
| 1896 | 55   | 33   | 22.5 | 28   | 37   | 23   | 8    | 21   | 29   |
| 1897 | 58.5 | 35   | 25   | 31   | 37   | 28.5 | 8    | 22   | 18   |
| 1898 | 62   | 36   | 21   | 35   | 46   | 25   | 8    | 19   | 13   |
| 1899 | 40   | 31.5 | 21   | 22   | 45.5 | 13   | 7    | 17   | 21   |
| 1900 | 36   | 22   | 17   | 24   | 25   | 10   | 8    | 13   | 19   |
| 1901 | 36   | 22   | 17   | 24   | 25   | 10   | 8    | 13   | 19   |
| 1902 | 59.5 | 27.5 | 20   | 31   | 29   | 25   | 8    | 16   | 34   |
| 1903 | 52   | 20   | 16   | 21   | 23   | 19   | 5    | 14   | 13.5 |
| 1904 | 45   | 32   | 20   | 23   | 32   | 15   | 6    | 16   | 17   |
| 1905 | 35   | 24   | 17   | 16.5 | 23   | 10.5 | 7    | 13   | 11   |
| 1906 | 50   | 37   | 25   | 48   | 38   | 29   | 11.5 | 17   | 73   |
| 1907 | 51   | 25   | 19   | 37   | 27   | 35   | 9.5  | 15   | 19   |
| 1908 | 40   | 23   | 38   | 38   | 27   | 28   | 10   | 14   | 100  |
| 1909 | 37   | 30   | 21   | 40   | 360  | 15   | 12   | 14   | 55   |
| 1910 | 56   | 21   | 17   | 24.5 | 56   | 23   | 8    | 14   | 15.5 |
| 1911 | 48   | 28   | 21   | 29   | 35   | 27   | 7    | 18   | 19   |
| 1912 | 38   | 30   | 21   | 29   | 43   | 16   | 14   | 14   | 17   |
| 1913 | 57   | 12   | 8    | 21   | 10.5 | 25   | 6    | 8.5  | 12   |
| 1914 | 28   | 12   | 9    | 27   | 8    | 12.5 | 6    | 14   | 14   |
| 1915 | 41   | 20   | 19   | 17   | 23   | 13   | 8    | 13   | 10   |
| 1916 | 52.5 | 26   | 20   | 32   | 26   | 15   | 7    | 15   | 32.5 |
| 1917 | 62.5 | 31   | 19   | 38   | 30   | 30   | 9    | 18   | 19   |
| 1918 | 57.5 | 36   | 24   | 31   | 43   | 24   | 9.5  | 20   | 22   |
| 1919 | 29   | 35   | 19   | 50.5 | 130  | 17.5 | 10   | 17   | 62   |
| 1920 | 48   | 27   | 18   | 27   | 27   | 25   | 9    | 17   | 20   |
| 1921 | 48   | 26   | 19   | 23   | 38   | 20.5 | 7    | 18   | 14   |
| 1922 | 49   | 30   | 13   | 18   | 37   | 29   | 2    | -1   | 18   |
| 1923 | 40   | 27   | 18   | 24   | 32   | 14.5 | 7    | 15   | 38   |
| 1924 | 64   | 22   | 18   | 26   | 24.5 | 28   | 8    | 17   | 15   |
| 1925 | 76.5 | 31   | 18   | 48   | 60   | 12   | 11   | 18.5 | 11.5 |

|      |      |      |      |      |      |      |     |      |      |
|------|------|------|------|------|------|------|-----|------|------|
| 1926 | 40   | 29   | 25   | 28   | 49.5 | 15   | 11  | 16   | 13   |
| 1927 | 48   | 27   | 20   | 29   | 30   | 20   | 8   | 15   | 26   |
| 1928 | 63   | 30   | 20   | 37.5 | 37   | 30.5 | 10  | 20   | 31   |
| 1929 | 59   | 21   | 17   | 14   | 26   | 11   | 9   | 13   | 39   |
| 1930 | 73   | 28   | 21   | 43   | 42   | 30   | 8   | 17   | 16   |
| 1931 | 73   | 25   | 17   | 27   | 29   | 32   | 7   | 17   | 12   |
| 1932 | 60   | 24   | 17   | 29   | 27   | 27.5 | 8   | 17   | 20   |
| 1933 | 66   | 23.5 | 16   | 30   | 27   | 34   | 7   | 17   | 16   |
| 1934 | 61.5 | 24   | 25   | 21   | 27   | 27   | 8   | 20   | 40   |
| 1935 | 63   | 28.5 | 19   | 33   | 30   | 34   | 8   | 19.5 | 17   |
| 1936 | 35   | 11   | 9    | 23   | 9    | 16   | 7.5 | 7    | 20   |
| 1937 | 116  | 35   | 18   | 32.5 | 77.5 | 44   | 39  | 10   | 13.5 |
| 1938 | 43   | 8    | 6    | 26   | 9    | 22   | 5   | 9    | 22   |
| 1939 | 45   | 11   | 8    | 29   | 9.5  | 21.5 | 7   | 11   | 13   |
| 1940 | 53.5 | 24   | 17   | 22   | 23   | 29   | 7   | 17   | 17   |
| 1941 | 46   | 19   | 15   | 18.5 | 24   | 19   | 6   | 13   | 19   |
| 1942 | 60   | 19   | 15   | 22   | 22   | 30   | 7   | 16   | 19   |
| 1943 | 46   | 19   | 15   | 18.5 | 24   | 19   | 6   | 13   | 19   |
| 1944 | 60   | 19   | 15   | 22   | 22   | 30   | 7   | 16   | 19   |
| 1945 | 67   | 32   | 23   | 22   | 38   | 26   | 7   | 19   | 20   |
| 1946 | 55.5 | 24.5 | 15   | 29   | 32   | 26   | 8.5 | 17   | 18   |
| 1947 | 72.5 | 38   | 23   | 41   | 41   | 32   | 11  | 21.5 | 48   |
| 1948 | 45   | 25   | 16   | 13   | 23   | 11   | 4   | 13   | 20   |
| 1949 | 67   | 30   | 20   | 27   | 36   | 19   | 8   | 22   | 20   |
| 1950 | 39   | 21   | 16   | 17   | 33.5 | 9.5  | 6.5 | 12   | 9    |
| 1951 | 104  | 36   | 20   | 30   | 39   | 50   | 10  | 22   | 34   |
| 1952 | 55.5 | 29   | 23   | 29   | 35   | 24.5 | 9   | 18   | 23   |
| 1953 | 65.5 | 27   | 18   | 34   | 33   | 37   | 9   | 20   | 21   |
| 1954 | 56   | 25   | 17.5 | 26   | 32   | 26.5 | 8   | 18   | 16   |
| 1955 | 81   | 43   | 27   | 51   | 53.5 | 35   | 12  | 24   | 31   |
| 1956 | 43   | 12   | 9    | 28.5 | 10   | 19   | 8   | 9    | 14   |
| 1957 | 50   | 44   | 20   | 24.5 | 22   | 21   | 10  | 14   | 25   |
| 1958 | 52.5 | 23   | 15   | 21   | 23   | 29.5 | 6   | 14   | 24   |
| 1959 | 56   | 31   | 23   | 28.5 | 33   | 20   | 12  | 18   | 19   |
| 1960 | 60   | 31   | 21   | 30   | 41   | 24.5 | 9   | 18   | 13.5 |
| 1961 | 88   | 42.5 | 25   | 43.5 | 43   | 43   | 12  | 24   | 26   |
| 1962 | 78   | 40   | 23   | 44   | 40   | 57.5 | 13  | 19   | 41   |
| 1963 | 38   | 21   | 15   | 18   | 25   | 9    | 5   | 12   | 35   |
| 1964 | 55   | 26   | 16   | 33   | 36   | 38   | 10  | 16   | 24   |
| 1965 | 71   | 25   | 17   | 29   | 30   | 33.5 | 10  | 18   | 17   |
| 1966 | 60   | 35   | 19   | 41.5 | 39   | 26   | 9   | 18   | 21   |
| 1967 | 62   | 28   | 21.5 | 32   | 35   | 22   | 8.5 | 18   | 21   |
| 1968 | 36.5 | 26   | 20   | 22.5 | 36   | 22   | 7   | 14   | 19   |
| 1969 | 39   | 23   | 18   | 19.5 | 29.5 | 20   | 8   | 15   | 17   |
| 1970 | 52   | 21   | 18   | 26   | 25   | 19   | 7   | 12.5 | 16   |
| 1971 | 61.5 | 21   | 15   | 20   | 23   | 28   | 7   | 14   | 19   |
| 1972 | 47   | 34   | 20   | 28   | 37   | 20   | 8   | 18   | 21   |

|      |      |       |        |      |      |       |      |      |      |
|------|------|-------|--------|------|------|-------|------|------|------|
| 1973 | 63   | 31    | 21     | 21   | 35   | 29    | 11   | 20   | 20   |
| 1974 | 57   | 32    | 23     | 42   | 39   | 31    | 16   | 44   | 33   |
| 1975 | 841  | 562   | 4368   | 269  | 1285 | 537   | 1147 | 1472 | 1929 |
| 1976 | 76   | 28    | 20     | 20   | 33   | 32.5  | 10   | 20   | 13   |
| 1977 | 73   | 30    | 21     | 34   | 39   | 31.5  | 26   | 36   | 40   |
| 1978 | 40   | 26    | 18     | 22   | 23.5 | 11    | 7    | 14   | 51   |
| 1979 | 43   | 24.5  | 17     | 27   | 28   | 13    | 8    | 14   | 40   |
| 1980 | 47   | 26    | 22     | 19   | 31   | 14.5  | 12   | 21   | 21   |
| 1981 | 58.5 | 29    | 23     | 31   | 27   | 22.5  | 9    | 19   | 23   |
| 1982 | 84   | 16    | 12     | 29   | 17   | 40    | 9    | 15   | 19   |
| 1983 | 27   | 20    | 25     | 54.5 | 16   | 14    | 21   | 10   | 30   |
| 1984 | 38   | 16    | 11     | 29   | 42   | 11    | 8    | 7    | 13   |
| 1985 | 39   | 8     | 7      | 16   | 6    | 17    | 6    | 6    | 11   |
| 1986 | 80   | 33    | 21     | 43   | 39   | 42    | 9    | 20   | 16   |
| 1987 | 63   | 30    | 20     | 28   | 55   | 27    | 10   | 19   | 25   |
| 1988 | 77.5 | 30    | 18     | 29   | 33   | 42.5  | 8    | 26   | 27   |
| 1989 | 59   | 23    | 21     | 22   | 30   | 34    | 10   | 17   | 18   |
| 1990 | 55   | 26    | 17     | 21   | 32   | 35    | 7    | 17   | 20   |
| 1991 | 63   | 21.5  | 16     | 22   | 33   | 46    | 7    | 17   | 12   |
| 1992 | 47   | 18    | 17     | 19   | 23   | 24    | 8    | 14   | 21   |
| 1993 | 52.5 | 19    | 15     | 20   | 32   | 22    | 6    | 15   | 15.5 |
| 1994 | 52.5 | 19    | 15     | 20   | 32   | 22    | 6    | 15   | 15.5 |
| 1995 | 895  | 606.5 | 5038.5 | 304  | 1418 | 594.5 | 1415 | 1687 | 2152 |
| 1996 | 92   | 35    | 31     | 23   | 44   | 53    | 10   | 23   | 34   |
| 1997 | 69   | 31    | 23     | 20   | 39   | 34    | 11   | 22   | 18   |
| 1998 | 65   | 26    | 21     | 18   | 32   | 26.5  | 9    | 17   | 28   |
| 1999 | 49   | 27    | 18     | 32   | 32   | 21    | 7    | 16   | 35   |
| 2000 | 49   | 27    | 18     | 32   | 32   | 21    | 7    | 16   | 35   |
| 2001 | 37.5 | 31    | 18     | 18   | 30   | 12    | 5    | 17   | 17   |
| 2002 | 49   | 21    | 14     | 15   | 26   | 13.5  | 4    | 14   | 14   |
| 2003 | 54.5 | 29    | 20     | 31   | 30   | 16    | 8    | 14   | 20   |
| 2004 | 52   | 27.5  | 18     | 27.5 | 25.5 | 19    | 7    | 16   | 28   |
| 2005 | 59   | 25    | 17     | 33   | 24   | 25.5  | 9    | 16   | 32   |
| 2006 | 40   | 33    | 16.5   | 44   | 27   | 9     | 6.5  | 13   | 28   |
| 2007 | 62   | 26    | 19     | 35   | 30   | 32    | 10.5 | 18   | 20   |
| 2008 | 38.5 | 19    | 17     | 24   | 22   | 16    | 6    | 11   | 15   |
| 2009 | 38.5 | 19    | 17     | 24   | 22   | 16    | 6    | 11   | 15   |
| 2010 | 109  | 43    | 38     | 57   | 41.5 | 56    | 12   | 24   | 20   |
| 2011 | 72   | 36    | 26     | 28   | 38   | 32    | 12   | 21   | 18.5 |
| 2012 | 78   | 31    | 22     | 31   | 35   | 40.5  | 9    | 22   | 20   |
| 2013 | 93   | 45    | 27     | 37   | 40   | 35.5  | 11   | 25   | 21.5 |
| 2014 | 50   | 33    | 22.5   | 33   | 34   | 22    | 11   | 19   | 35   |
| 2015 | 68   | 27.5  | 30     | 30   | 41   | 40    | 9.5  | 20   | 20.5 |
| 2016 | 37   | 38    | 19     | 39   | 34   | 18    | 37   | 16   | 26   |
| 2017 | 66   | 35    | 27     | 37   | 42   | 24    | 13   | 19   | 52.5 |
| 2018 | 61.5 | 26    | 15     | 33   | 25   | 33    | 22.5 | 24   | 33   |
| 2019 | 52   | 23    | 17     | 20   | 26   | 21    | 7    | 14   | 17   |

|      |      |       |      |      |      |      |      |      |      |
|------|------|-------|------|------|------|------|------|------|------|
| 2020 | 43   | 21    | 16   | 20   | 20   | 17   | 6    | 12   | 15   |
| 2021 | 56   | 28    | 22   | 28.5 | 29.5 | 23   | 10   | 21.5 | 29   |
| 2022 | 61.5 | 25    | 17   | 25   | 33   | 28   | 8    | 18   | 19   |
| 2023 | 75   | 22.5  | 16   | 29   | 28   | 32   | 7    | 18   | 26   |
| 2024 | 75   | 26    | 18   | 42.5 | 31   | 41   | 10   | 22   | 52   |
| 2025 | 44   | 32    | 16   | 27   | 24   | 11   | 6.5  | 13   | 27.5 |
| 2026 | 107  | 23    | 26   | 15   | 82   | 48.5 | 13   | 15.5 | 15   |
| 2027 | 58   | 10    | 8    | 23   | 15.5 | 30   | 12   | 12   | 21   |
| 2028 | 55   | 35    | 24   | 38   | 43   | 23.5 | 11   | 21   | 29   |
| 2029 | 65.5 | 30    | 21.5 | 23   | 27   | 30   | 8    | 17   | 20   |
| 2030 | 16   | 12    | 6    | 22   | 15.5 | 6    | 6    | 6    | 8    |
| 2031 | 47   | 16    | 9    | 27   | 10   | 22   | 7    | 9    | 14   |
| 2032 | 45   | 9     | 9    | 25.5 | 12   | 20   | 8    | 9    | 29   |
| 2033 | 62   | 28    | 21   | 16   | 37   | 26   | 6    | 18   | 55   |
| 2034 | 54   | 31    | 20   | 35   | 34   | 15   | 7    | 17   | 16   |
| 2035 | 46   | 27    | 20   | 24   | 29   | 16   | 4    | 16   | 19   |
| 2036 | 81   | 32    | 23   | 42   | 33   | 38   | 7    | 20   | 16.5 |
| 2037 | 54   | 31    | 20   | 35   | 34   | 15   | 7    | 17   | 16   |
| 2038 | 46   | 27    | 20   | 24   | 29   | 16   | 4    | 16   | 19   |
| 2039 | 81   | 32    | 23   | 42   | 33   | 38   | 7    | 20   | 16.5 |
| 2040 | 95   | 25    | 17   | 20   | 28   | 26.5 | 7    | 15   | 22   |
| 2041 | 35.5 | 22    | 14   | 22   | 22   | 15   | 9.5  | 13   | 11   |
| 2042 | 34   | 8     | 6    | 20   | 15   | 13   | 6    | 5    | 16   |
| 2043 | 45   | 27    | 20   | 26   | 32   | 13   | 11   | 15   | 17   |
| 2044 | 46   | 31.5  | 20   | 40   | 85   | 22   | 8    | 17   | 32   |
| 2045 | 58   | 28    | 30.5 | 37   | 33   | 34   | 13   | 17   | 19   |
| 2046 | 77   | 23    | 16   | 22   | 28   | 41   | 6    | 18   | 24   |
| 2047 | 46   | 32    | 18   | 32   | 36.5 | 37.5 | 13   | 17   | 21   |
| 2048 | 71   | 26    | 17   | 32   | 31   | 38   | 8    | 27   | 37   |
| 2049 | 85   | 28    | 18   | 27   | 31   | 43   | 9    | 18   | 15   |
| 2050 | 54   | 28    | 16   | 28   | 27   | 22.5 | 8    | 17   | 16   |
| 2051 | 62   | 33    | 20   | 46   | 34.5 | 41   | 10   | 20   | 37   |
| 2052 | 92   | 25    | 18   | 38   | 28   | 41   | 10   | 21   | 17   |
| 2053 | 86   | 29.5  | 17   | 46   | 27   | 43   | 8    | 18   | 28   |
| 2054 | 66.5 | 23    | 18   | 29   | 28   | 42   | 7    | 18   | 19   |
| 2055 | 125  | 187.5 | 69   | 99   | 31   | 191  | 74.5 | 73   | 64   |
| 2056 | 61.5 | 29    | 21   | 26.5 | 34   | 34   | 9    | 22   | 16   |
| 2057 | 74   | 40    | 27   | 42   | 44.5 | 39   | 14   | 24   | 39.5 |
| 2058 | 46   | 31    | 16   | 29   | 25   | 19   | 6    | 14.5 | 31.5 |
| 2059 | 62   | 23    | 16   | 25.5 | 26   | 31   | 6    | 17   | 16   |
| 2060 | 68   | 35.5  | 26   | 34   | 47   | 27   | 9    | 21.5 | 31   |
| 2061 | 74   | 31    | 24   | 36.5 | 36.5 | 32.5 | 9    | 18   | 27.5 |
| 2062 | 54   | 13    | 9    | 24   | 13   | 31   | 8    | 12   | 19   |
| 2063 | 54   | 10    | 10   | 27   | 9    | 29   | 6    | 10   | 10.5 |
| 2064 | 54   | 9     | 8    | 23   | 11   | 22   | 6    | 10   | 19   |
| 2065 | 73   | 24    | 18.5 | 26   | 30   | 36   | 7    | 19   | 17   |
| 2066 | 65   | 23    | 14   | 25   | 22   | 32   | 8    | 15   | 16   |

|      |       |      |      |      |      |      |     |      |      |
|------|-------|------|------|------|------|------|-----|------|------|
| 2067 | 61.5  | 20   | 15   | 23   | 28   | 27   | 7   | 16   | 16   |
| 2068 | 50.5  | 23   | 15   | 21   | 23   | 33   | 7   | 14   | 18.5 |
| 2069 | 37    | 19   | 14   | 20   | 23.5 | 11   | 6   | 12   | 17   |
| 2070 | 40    | 20   | 16   | 19   | 26   | 25   | 6   | 14   | 18   |
| 2071 | 50.5  | 23   | 15   | 21   | 23   | 33   | 7   | 14   | 18.5 |
| 2072 | 37    | 19   | 14   | 20   | 23.5 | 11   | 6   | 12   | 17   |
| 2073 | 40    | 20   | 16   | 19   | 26   | 25   | 6   | 14   | 18   |
| 2074 | 63.5  | 36   | 28.5 | 24   | 37   | 12   | 24  | 17   | 97   |
| 2075 | 76    | 28   | 22   | 23.5 | 34   | 28   | 8   | 17   | 23   |
| 2076 | 53    | 29   | 22   | 25.5 | 32   | 18   | 8   | 17   | 28   |
| 2077 | 52    | 31   | 23   | 25   | 31   | 20   | 10  | 17   | 17   |
| 2078 | 53    | 29   | 22   | 25.5 | 32   | 18   | 8   | 17   | 28   |
| 2079 | 52    | 31   | 23   | 25   | 31   | 20   | 10  | 17   | 17   |
| 2080 | 43.5  | 22   | 18   | 29   | 27.5 | 18   | 8   | 14   | 16   |
| 2081 | 43.5  | 22   | 18   | 29   | 27.5 | 18   | 8   | 14   | 16   |
| 2082 | 52.5  | 27   | 20   | 26   | 39.5 | 26   | 9   | 20   | 16   |
| 2083 | 63    | 26   | 17   | 21   | 28   | 23   | 6   | 16   | 13   |
| 2084 | 78    | 30.5 | 21   | 26   | 36   | 26   | 9.5 | 19   | 15   |
| 2085 | 62    | 30.5 | 19.5 | 24   | 38   | 31.5 | 9   | 19   | 19   |
| 2086 | 68    | 23   | 19   | 32   | 27   | 40.5 | 9   | 20   | 25   |
| 2087 | 36    | 22   | 14   | 13   | 57.5 | 6    | 5   | 12   | 14   |
| 2088 | 50    | 31   | 21   | 39   | 35   | 30.5 | 14  | 23   | 75.5 |
| 2089 | 69    | 25   | 16.5 | 26.5 | 31   | 34   | 9   | 18.5 | 23   |
| 2090 | 71    | 24   | 20   | 30   | 35   | 35   | 8   | 22   | 38   |
| 2091 | 76    | 31   | 19.5 | 31   | 56   | 41.5 | 9   | 21   | 34.5 |
| 2092 | 39.5  | 20.5 | 15   | 18.5 | 28   | 19.5 | 6   | 11   | 32.5 |
| 2093 | 78.5  | 22   | 15   | 44   | 24   | 38.5 | 8   | 13   | 32   |
| 2094 | 78.5  | 22   | 15   | 44   | 24   | 38.5 | 8   | 13   | 32   |
| 2095 | 59    | 29   | 19   | 28   | 27   | 22   | 8   | 17   | 20   |
| 2096 | 59.5  | 29   | 24   | 38   | 33.5 | 28   | 13  | 19   | 23   |
| 2097 | 47    | 25   | 19   | 28   | 29   | 18   | 9   | 14   | 17   |
| 2098 | 59    | 23   | 15   | 32   | 30   | 32   | 8   | 16   | 24   |
| 2099 | 45    | 26   | 18   | 44   | 27   | 36   | 8   | 14   | 36   |
| 2100 | 23    | 27   | 15   | 33   | 23   | 6    | 4.5 | 12   | 13   |
| 2101 | 111.5 | 35   | 23   | 36   | 41   | 71.5 | 11  | 30.5 | 31   |
| 2102 | 55.5  | 27   | 19   | 36.5 | 28.5 | 24   | 10  | 14   | 24   |
| 2103 | 52    | 25   | 20   | 22   | 28   | 27   | 6   | 17   | 13   |
| 2104 | 85.5  | 31   | 20   | 27   | 36   | 45   | 9   | 19   | 22   |
| 2105 | 70    | 27   | 18   | 23   | 25   | 24.5 | 8   | 15   | 16   |
| 2106 | 42.5  | 28   | 22   | 48   | 24   | 13   | 6   | 13   | 19   |
| 2107 | 81    | 35   | 21   | 37   | 37   | 35   | 13  | 19   | 26   |
| 2108 | 52    | 25   | 16   | 35   | 26   | 18   | 6.5 | 14   | 28.5 |
| 2109 | 65.5  | 25   | 17   | 27   | 25   | 21   | 8.5 | 14.5 | 21   |
| 2110 | 44    | 7    | 7    | 19   | 8    | 20   | 6   | 8.5  | 12   |
| 2111 | 43.5  | 39   | 18   | 27   | 29   | 11   | 5   | 15   | 23   |
| 2112 | 32    | 12   | 9    | 47   | 13   | 13   | 6   | 9    | 33   |
| 2113 | 28    | 15   | 14   | 27.5 | 10   | 10   | 8   | 6    | 22   |

|      |      |      |      |      |      |      |     |      |      |
|------|------|------|------|------|------|------|-----|------|------|
| 2114 | 44   | 12   | 14   | 29   | 10   | 21   | 9   | 9    | 46   |
| 2115 | 38   | 10   | 15   | 26   | 20   | 16   | 6   | 8    | 16.5 |
| 2116 | 42   | 17   | 10   | 34   | 12   | 21   | 10  | 9    | 15.5 |
| 2117 | 55.5 | 30   | 23   | 28   | 31   | 21   | 12  | 18   | 28   |
| 2118 | 69.5 | 38   | 15.5 | 29   | 41   | 17   | 33  | 25   | 23   |
| 2119 | 49   | 22   | 16   | 23   | 25   | 27   | 9   | 17   | 21   |
| 2120 | 60   | 30   | 21   | 17   | 38   | 24.5 | 8   | 18   | 16   |
| 2121 | 73   | 26   | 22   | 19   | 30   | 34   | 10  | 22   | 22   |
| 2122 | 40   | 29   | 19   | 18   | 30   | 14   | 5   | 22   | 23.5 |
| 2123 | 84.5 | 25   | 18   | 34   | 27   | 34   | 7   | 17   | 42   |
| 2124 | 79.5 | 30   | 19   | 35.5 | 29   | 28   | 9   | 21   | 19   |
| 2125 | 45.5 | 26.5 | 20   | 29   | 32   | 12   | 9   | 15   | 16   |
| 2126 | 50   | 31.5 | 20   | 20.5 | 34   | 21   | 7   | 19   | 17   |
| 2127 | 43   | 28   | 18.5 | 21   | 59.5 | 15   | 32  | 16   | 14   |
| 2128 | 96   | 25   | 17   | 21   | 29   | 43   | 6.5 | 18   | 23   |
| 2129 | 64   | 24   | 18   | 24   | 31   | 27   | 9.5 | 18   | 37   |
| 2130 | 38   | 27   | 15   | 37.5 | 25.5 | 11   | 11  | 13   | 29   |
| 2131 | 54   | 29   | 25   | 19   | 31.5 | 14.5 | 8.5 | 16   | 22   |
| 2132 | 71   | 29   | 21   | 33   | 39.5 | 33.5 | 11  | 21   | 27   |
| 2133 | 41   | 24   | 15   | 14   | 28   | 8    | 4   | 14   | 16   |
| 2134 | 69.5 | 29   | 22.5 | 43.5 | 29   | 27   | 12  | 18   | 24   |
| 2135 | 122  | 26   | 22   | 23   | 36   | 21   | 15  | 17.5 | 21   |
| 2136 | 64.5 | 26   | 17   | 36   | 28.5 | 34.5 | 7   | 19   | 23   |
| 2137 | 81   | 28   | 21   | 33   | 37   | 39   | 8   | 21   | 23   |
| 2138 | 59   | 25   | 15   | 22   | 22   | 23   | 6   | 14   | 10   |
| 2139 | 67   | 32   | 22   | 26   | 35   | 31   | 10  | 23   | 19   |
| 2140 | 42   | 27   | 16.5 | 29   | 105  | 14   | 31  | 15   | 70   |
| 2141 | 54   | 23   | 22   | 36   | 29   | 21   | 8   | 15   | 53   |
| 2142 | 72.5 | 33.5 | 21   | 39.5 | 35   | 38   | 9   | 20   | 18   |
| 2143 | 65   | 12   | 8    | 19.5 | 11   | 29   | 5   | 9    | 25   |
| 2144 | 64   | 15   | 25   | 30   | 12   | 31   | 7   | 19   | 26   |
| 2145 | 84   | 13   | 8    | 23.5 | 15   | 27   | 9   | 11   | 18   |
| 2146 | 47   | 17   | 9    | 29   | 12   | 19   | 9   | 9    | 32   |
| 2147 | 59.5 | 16   | 14   | 30   | 17   | 32   | 10  | 15   | 15   |
| 2148 | 49   | 12   | 9    | 28.5 | 11   | 19   | 7   | 9    | 23   |
| 2149 | 62   | 10   | 8    | 28   | 10   | 36   | 7   | 11   | 19   |
| 2150 | 66   | 31.5 | 20.5 | 21   | 36   | 35   | 7   | 19   | 22   |
| 2151 | 56   | 28   | 18   | 31   | 29.5 | 22   | 12  | 18   | 22   |
| 2152 | 48.5 | 27   | 15.5 | 22   | 34   | 20   | 9   | 15   | 16   |
| 2153 | 71.5 | 23   | 16   | 24   | 23   | 39   | 6   | 15   | 82   |
| 2154 | 91   | 20.5 | 15   | 27   | 25   | 55   | 7   | 18   | 14   |
| 2155 | 74.5 | 21   | 15   | 35   | 23   | 51   | 6   | 15   | 13   |
| 2156 | 74   | 20   | 15   | 22   | 21   | 41.5 | 7   | 16   | 28   |
| 2157 | 91   | 20.5 | 15   | 27   | 25   | 55   | 7   | 18   | 14   |
| 2158 | 74.5 | 21   | 15   | 35   | 23   | 51   | 6   | 15   | 13   |
| 2159 | 74   | 20   | 15   | 22   | 21   | 41.5 | 7   | 16   | 28   |
| 2160 | 62   | 32   | 19   | 24   | 29.5 | 27.5 | 7   | 18   | 21   |



|      |        |      |      |      |      |       |      |        |        |
|------|--------|------|------|------|------|-------|------|--------|--------|
| 2161 | 62     | 32   | 19   | 24   | 29.5 | 27.5  | 7    | 18     | 21     |
| 2162 | 43     | 23   | 17   | 27   | 24   | 13    | 7    | 14     | 17.5   |
| 2163 | 77.5   | 33   | 21   | 41   | 40   | 41    | 9    | 21     | 21     |
| 2164 | 41     | 31   | 22   | 50   | 34   | 21    | 36   | 109    | 61     |
| 2165 | 61.5   | 31   | 19   | 29   | 39   | 19    | 15   | 19     | 21     |
| 2166 | 79     | 33   | 22   | 30   | 39   | 37    | 9.5  | 24     | 34     |
| 2167 | 72     | 36   | 25   | 40   | 52   | 29    | 12   | 130    | 22     |
| 2168 | 62     | 20   | 17   | 21   | 27   | 25    | 9    | 15     | 18     |
| 2169 | 45     | 16   | 8    | 38   | 17   | 24    | 9.5  | 8      | 22     |
| 2170 | 51     | 9.5  | 9    | 28   | 10   | 26    | 9    | 8      | 16.5   |
| 2171 | 73     | 28   | 23   | 24   | 31   | 37    | 9    | 18     | 28     |
| 2172 | 63     | 33   | 31.5 | 40   | 65   | 19    | 12   | 16     | 43     |
| 2173 | 49     | 23   | 16   | 26   | 27   | 21    | 6    | 13     | 29     |
| 2174 | 52     | 25   | 15   | 27   | 35   | 26    | 7    | 13     | 20     |
| 2175 | 67     | 25   | 23   | 46   | 29   | 34    | 6    | 16     | 15     |
| 2176 | 60     | 43   | 24.5 | 41   | 48.5 | 17    | 13   | 20     | 22     |
| 2177 | 79     | 26   | 20   | 36   | 31   | 53    | 10   | 20     | 30     |
| 2178 | 53     | 25   | 23   | 33   | 33   | 28    | 8    | 16     | 24     |
| 2179 | 62     | 34.5 | 20   | 42   | 34   | 40    | 15   | 16     | 26     |
| 2180 | 53     | 26   | 21   | 38   | 34   | 25    | 10   | 16     | 18     |
| 2181 | 70     | 28   | 22   | 34.5 | 33   | 33.5  | 12   | 21     | 24     |
| 2182 | 46.5   | 25   | 18   | 22   | 26   | 15    | 5.5  | 14     | 34.5   |
| 2183 | 38     | 9    | 9    | 25   | 12   | 22    | 9    | 11     | 35     |
| 2184 | 73     | 39   | 25   | 39   | 43   | 23    | 11   | 23     | 30     |
| 2185 | 74.5   | 25.5 | 17   | 27.5 | 29   | 32    | 8    | 18     | 31     |
| 2186 | 48     | 11   | 7    | 26   | 9    | 19    | 6    | 8      | 29     |
| 2187 | 40     | 13.5 | 12   | 40   | 11   | 21    | 51   | 8      | 22     |
| 2188 | 98     | 34.5 | 20   | 42   | 36   | 55.5  | 8    | 36     | 26     |
| 2189 | 61     | 26.5 | 20   | 23   | 34   | 25    | 42   | 17     | 25     |
| 2190 | 61     | 28.5 | 21   | 28   | 30   | 50    | 9    | 18     | 16     |
| 2191 | 69     | 21   | 17   | 22   | 25   | 32    | 7    | 17     | 18     |
| 2192 | 67     | 32.5 | 28   | 17   | 45   | 36    | 8    | 18.5   | 17     |
| 2193 | 81     | 36   | 25   | 27.5 | 38   | 31    | 8    | 22     | 35     |
| 2194 | 55     | 25   | 18   | 13   | 28   | 20    | 6    | 16     | 26     |
| 2195 | 1010.5 | 608  | 4927 | 301  | 1388 | 588.5 | 1392 | 1717.5 | 2082.5 |
| 2196 | 1010.5 | 608  | 4927 | 301  | 1388 | 588.5 | 1392 | 1717.5 | 2082.5 |
| 2197 | 73     | 32   | 25   | 77   | 46   | 31    | 15   | 17     | 27     |
| 2198 | 56     | 27   | 20   | 31   | 29   | 26.5  | 9    | 17     | 21     |
| 2199 | 62     | 32.5 | 25.5 | 29   | 35   | 29.5  | 9    | 20     | 20     |
| 2200 | 66     | 30   | 22   | 32   | 29   | 51    | 14   | 17     | 26     |
| 2201 | 37     | 26   | 24   | 25   | 29   | 10    | 6    | 14     | 21     |
| 2202 | 87     | 36.5 | 25   | 26   | 41   | 36.5  | 11   | 22     | 17     |
| 2203 | 68     | 32   | 23   | 22   | 31   | 28    | 9    | 18     | 24     |
| 2204 | 61.5   | 27   | 19   | 35.5 | 31   | 23    | 12   | 17     | 21     |
| 2205 | 61.5   | 27   | 19   | 35.5 | 31   | 23    | 12   | 17     | 21     |
| 2206 | 106.5  | 30   | 19   | 35   | 33.5 | 56.5  | 11.5 | 19     | 104    |
| 2207 | 81     | 31   | 21   | 40   | 32.5 | 49    | 9.5  | 20     | 22     |

|      |       |      |      |      |      |      |      |      |      |
|------|-------|------|------|------|------|------|------|------|------|
| 2208 | 48    | 24.5 | 17   | 19   | 26   | 12   | 10   | 16   | 13   |
| 2209 | 51    | 32   | 20.5 | 24   | 37.5 | 20   | 8    | 17   | 37.5 |
| 2210 | 50    | 29   | 20   | 26   | 32   | 17   | 8    | 16.5 | 27   |
| 2211 | 82    | 31   | 20   | 45   | 51   | 38   | 14   | 22   | 34   |
| 2212 | 64    | 29   | 19   | 28   | 32   | 27   | 8    | 18   | 21   |
| 2213 | 55.5  | 27.5 | 20   | 29   | 35.5 | 24   | 7    | 17   | 21   |
| 2214 | 55    | 24   | 18   | 23   | 28.5 | 20   | 7    | 15   | 20   |
| 2215 | 78.5  | 24   | 17   | 29.5 | 27   | 38   | 21   | 17   | 25   |
| 2216 | 67    | 26   | 19   | 34   | 35   | 42   | 8    | 20   | 21   |
| 2217 | 39    | 35   | 22   | 33   | 40.5 | 14   | 8    | 17   | 19   |
| 2218 | 71    | 31   | 22   | 38   | 37   | 38   | 11.5 | 22   | 47   |
| 2219 | 57    | 27.5 | 22   | 30   | 41   | 22.5 | 9    | 20   | 19   |
| 2220 | 88    | 34   | 25.5 | 55   | 46   | 35   | 12   | 25   | 38   |
| 2221 | 44    | 10   | 8    | 23   | 8    | 11   | 7    | 7.5  | 26   |
| 2222 | 27    | 10   | 8    | 18   | 164  | 12   | 10   | 6    | 16.5 |
| 2223 | 41.5  | 15   | 9    | 31   | 10.5 | 20   | 8    | 8    | 38   |
| 2224 | 58.5  | 9    | 8    | 28   | 11   | 29   | 10   | 14   | 15   |
| 2225 | 64    | 29   | 22   | 20   | 34   | 30   | 8    | 18   | 20   |
| 2226 | 58    | 25   | 18   | 24   | 27   | 22   | 8    | 15   | 15   |
| 2227 | 72    | 21   | 16   | 21   | 29   | 33   | 8    | 18   | 21   |
| 2228 | 57    | 22   | 20   | 23   | 27   | 30   | 82   | 16   | 33   |
| 2229 | 57    | 22   | 20   | 23   | 27   | 30   | 82   | 16   | 33   |
| 2230 | 39    | 25   | 16   | 23   | 26   | 14   | 6    | 15   | 17   |
| 2231 | 39    | 25   | 16   | 23   | 26   | 14   | 6    | 15   | 17   |
| 2232 | 47.5  | 30   | 30   | 23   | 52   | 13   | 5.5  | 15   | 22   |
| 2233 | 79    | 28   | 17   | 31   | 27   | 34   | 9    | 17   | 16   |
| 2234 | 61    | 36   | 35.5 | 190  | 33   | 22   | 13   | 18   | 19   |
| 2235 | 88.5  | 37   | 23   | 35   | 44.5 | 35   | 11   | 23   | 32   |
| 2236 | 112.5 | 39   | 24.5 | 45.5 | 50   | 66   | 14   | 24   | 26   |
| 2237 | 54    | 24   | 19   | 26   | 25   | 25   | 9    | 15   | 22   |
| 2238 | 94    | 33   | 25   | 21   | 38   | 41   | 8    | 21   | 40.5 |
| 2239 | 53    | 26   | 20   | 17   | 32.5 | 15   | 6    | 20   | 18   |
| 2240 | 53    | 26   | 20   | 17   | 32.5 | 15   | 6    | 20   | 18   |
| 2241 | 79.5  | 24   | 17   | 25   | 57   | 37   | 7    | 17   | 19   |
| 2242 | 72    | 30   | 20   | 40   | 32   | 24.5 | 9    | 17   | 31   |
| 2243 | 77    | 32   | 20   | 37.5 | 38   | 44.5 | 11   | 23   | 20   |
| 2244 | 95    | 28   | 17   | 33   | 26   | 41   | 6    | 15.5 | 16   |
| 2245 | 76    | 32   | 21.5 | 36   | 38   | 43   | 9    | 21   | 24   |
| 2246 | 57    | 40   | 34   | 49   | 79   | 29   | 100  | 21   | 66   |
| 2247 | 46    | 13   | 10   | 13   | 16   | 15.5 | 5    | 10   | 13   |
| 2248 | 84    | 32   | 23   | 34   | 30   | 33.5 | 9    | 22   | 23   |
| 2249 | 65    | 32   | 24   | 34   | 32   | 30   | 10   | 18   | 22   |
| 2250 | 54.5  | 30   | 17   | 19   | 33   | 19   | 11   | 15   | 18   |
| 2251 | 81    | 26   | 16   | 39.5 | 28   | 47   | 11   | 19   | 36.5 |
| 2252 | 39    | 45   | 24.5 | 27   | 35   | 18   | 10.5 | 34   | 19.5 |
| 2253 | 42    | 56   | 53   | 84   | 41   | 35   | 61   | 54   | 57   |
| 2254 | 61    | 28   | 20   | 33   | 29   | 26   | 10   | 19   | 21   |

|      |       |      |      |      |      |      |     |      |      |
|------|-------|------|------|------|------|------|-----|------|------|
| 2255 | 77    | 26   | 17   | 29   | 33   | 31.5 | 9   | 20   | 29   |
| 2256 | 80    | 33   | 25   | 44   | 41   | 37   | 9.5 | 23   | 44   |
| 2257 | 42.5  | 11   | 10   | 22   | 49   | 16   | 7   | 7    | 30   |
| 2258 | 71    | 30   | 24   | 42   | 32   | 30   | 11  | 24   | 52   |
| 2259 | 53.5  | 13   | 8    | 26   | 13   | 24.5 | 7   | 11   | 32   |
| 2260 | 39    | 9    | 7    | 23   | 12   | 13   | 4   | 5    | 61   |
| 2261 | 57    | 12   | 8    | 30   | 29   | 24   | 8   | 10   | 15   |
| 2262 | 75    | 31   | 20   | 27   | 36   | 29.5 | 7   | 20   | 54   |
| 2263 | 71    | 32.5 | 21   | 25.5 | 35   | 34.5 | 7   | 19   | 23   |
| 2264 | 74.5  | 34.5 | 23   | 24   | 36   | 25.5 | 10  | 22   | 29   |
| 2265 | 39    | 27   | 19.5 | 32   | 24.5 | 12   | 8   | 13.5 | 27   |
| 2266 | 39    | 27   | 19.5 | 32   | 24.5 | 12   | 8   | 13.5 | 27   |
| 2267 | 57    | 33   | 22   | 25   | 29   | 21   | 18  | 17   | 20   |
| 2268 | 56    | 31.5 | 22   | 31   | 32   | 22.5 | 11  | 17   | 26   |
| 2269 | 29    | 43   | 29   | 37   | 24   | 8    | 6   | 13   | 7    |
| 2270 | 43    | 22   | 18   | 29   | 25   | 17   | 7   | 16   | 16   |
| 2271 | 70    | 32   | 31   | 41   | 47   | 28   | 16  | 19   | 102  |
| 2272 | 85    | 33   | 24   | 24   | 38   | 26   | 11  | 20   | 19   |
| 2273 | 77.5  | 29   | 22   | 27.5 | 31.5 | 47   | 9   | 20   | 27   |
| 2274 | 96    | 24   | 18   | 42   | 28   | 47.5 | 8   | 17.5 | 20   |
| 2275 | 60    | 27   | 17   | 34.5 | 56   | 30   | 10  | 16   | 19   |
| 2276 | 82    | 27   | 20   | 43   | 29   | 44   | 11  | 21   | 21   |
| 2277 | 94    | 24   | 17   | 28   | 24   | 59   | 12  | 20   | 24   |
| 2278 | 60    | 24   | 18   | 30   | 25   | 32   | 9   | 17   | 23   |
| 2279 | 90.5  | 24   | 16   | 22   | 49   | 39.5 | 8   | 16   | 23   |
| 2280 | 83.5  | 27   | 21   | 28   | 37.5 | 35   | 9   | 21   | 41.5 |
| 2281 | 105.5 | 71   | 24   | 152  | 54   | 66   | 47  | 21.5 | 61   |
| 2282 | 58    | 23   | 19   | 21   | 27   | 29.5 | 8   | 16   | 18   |
| 2283 | 58    | 23   | 18   | 22   | 27   | 26   | 7   | 17   | 20.5 |
| 2284 | 91    | 39   | 23   | 41.5 | 43   | 34   | 12  | 21   | 32   |
| 2285 | 60    | 27   | 24   | 27   | 32.5 | 11   | 6   | 17.5 | 32   |
| 2286 | 34.5  | 13   | 11   | 32   | 18   | 10   | 8   | 7    | 42   |
| 2287 | 30    | 11   | 7    | 21   | 9    | 11   | 7   | 6    | 34   |
| 2288 | 66    | 32   | 22   | 33   | 37   | 42   | 10  | 21   | 24   |
| 2289 | 68    | 29   | 21   | 26   | 38.5 | 33   | 12  | 17   | 46.5 |
| 2290 | 47    | 24   | 18   | 15   | 22   | 28   | 8   | 14   | 12   |
| 2291 | 47    | 24   | 14   | 17   | 21   | 13   | 7   | 10   | 27   |
| 2292 | 47    | 24   | 14   | 17   | 21   | 13   | 7   | 10   | 27   |
| 2293 | 91    | 36   | 27   | 19.5 | 57   | 33   | 11  | 20   | 20   |
| 2294 | 76    | 37   | 27   | 25   | 38   | 33   | 8   | 24   | 19   |
| 2295 | 52    | 25.5 | 20   | 15   | 28   | 22   | 8   | 16   | 19   |
| 2296 | 48    | 25   | 15.5 | 16   | 25   | 15   | 5   | 15   | 16   |
| 2297 | 47.5  | 22   | 17   | 34.5 | 29.5 | 18   | 8   | 14   | 33   |
| 2298 | 75.5  | 32   | 25   | 38   | 258  | 43   | 12  | 20   | 17.5 |
| 2299 | 161   | 35   | 18   | 55   | 26   | 66   | 17  | 24   | 9    |
| 2300 | 136   | 30   | 24   | 26   | 36   | 30   | 9   | 17   | 34   |
| 2301 | 64.5  | 28   | 19   | 29   | 79   | 32   | 10  | 18   | 21   |

|      |       |      |      |      |      |      |      |      |      |
|------|-------|------|------|------|------|------|------|------|------|
| 2302 | 79.5  | 30   | 19   | 29   | 37   | 39.5 | 9    | 21   | 43   |
| 2303 | 87.5  | 26   | 19   | 26   | 32   | 39.5 | 10   | 25   | 20   |
| 2304 | 33    | 20   | 22   | 12   | 81   | 11   | 12   | 10   | 15   |
| 2305 | 44    | 12   | 10   | 24   | 15   | 20   | 9    | 11   | 18   |
| 2306 | 64    | 25   | 17   | 22   | 30   | 30   | 7.5  | 18   | 22   |
| 2307 | 71    | 34   | 25   | 40.5 | 50.5 | 36   | 15   | 17   | 68   |
| 2308 | 77    | 46.5 | 29   | 38   | 45   | 34   | 19   | 21   | 46   |
| 2309 | 63    | 33   | 22   | 30   | 42   | 23   | 10   | 19   | 20   |
| 2310 | 91    | 25   | 18   | 34   | 34   | 35   | 9    | 16   | 31   |
| 2311 | 54    | 30   | 18   | 38   | 35.5 | 19   | 9    | 14   | 23   |
| 2312 | 74    | 33.5 | 24   | 32   | 37   | 27   | 12   | 21   | 24   |
| 2313 | 81.5  | 32   | 21   | 35   | 44   | 57   | 12   | 27   | 29   |
| 2314 | 124.5 | 24   | 19   | 23   | 24.5 | 32.5 | 8    | 16   | 26   |
| 2315 | 73    | 24   | 21   | 41   | 32   | 49   | 11   | 18   | 20   |
| 2316 | 74    | 95   | 84   | 102  | 85   | 56   | 94   | 98   | 70   |
| 2317 | 64.5  | 37   | 26   | 79   | 36   | 28   | 10.5 | 21   | 20   |
| 2318 | 72    | 46   | 29   | 40   | 42   | 28   | 55   | 21   | 31   |
| 2319 | 109   | 30   | 20.5 | 31   | 32   | 44   | 13   | 21   | 23   |
| 2320 | 78.5  | 25   | 23   | 33   | 31.5 | 30   | 8    | 17   | 29   |
| 2321 | 63    | 27.5 | 23   | 38   | 28   | 30   | 8    | 18   | 23   |
| 2322 | 155   | 44   | 30   | 64   | 53   | 70   | 16   | 34   | 48   |
| 2323 | 76    | 17   | 8    | 25.5 | 11   | 36   | 7    | 11   | 29   |
| 2324 | 48    | 13   | 10   | 30   | 13   | 24   | 7    | 13   | 24.5 |
| 2325 | 64    | 23   | 16   | 22   | 24.5 | 37.5 | 7    | 15   | 24   |
| 2326 | 54    | 21   | 19   | 21   | 22   | 19.5 | 6    | 14   | 27   |
| 2327 | 47    | 28.5 | 22   | 19   | 34.5 | 14   | 7.5  | 16   | 25.5 |
| 2328 | 64    | 29   | 20   | 78.5 | 33   | 30   | 10   | 70   | 24   |
| 2329 | 64    | 29   | 20   | 78.5 | 33   | 30   | 10   | 70   | 24   |
| 2330 | 56    | 34   | 20   | 29   | 40   | 21   | 8    | 35   | 62   |
| 2331 | 92    | 37   | 23   | 35   | 39.5 | 39.5 | 14   | 38   | 28   |
| 2332 | 76    | 32   | 21   | 32   | 40   | 34   | 13   | 24   | 32   |
| 2333 | 65    | 25   | 17   | 24.5 | 32   | 26   | 7    | 17   | 19   |
| 2334 | 58    | 26   | 20   | 24   | 34   | 22   | 7    | 21   | 23   |
| 2335 | 43    | 31   | 22   | 24   | 37.5 | 12   | 11   | 17   | 13   |
| 2336 | 70.5  | 33.5 | 24   | 23   | 63   | 30   | 10   | 22   | 19.5 |
| 2337 | 58    | 23.5 | 15   | 29.5 | 26.5 | 31   | 7    | 14.5 | 35   |
| 2338 | 85    | 29   | 19   | 32   | 29   | 40   | 10   | 18   | 22   |
| 2339 | 104.5 | 35   | 25   | 34   | 39   | 54   | 13   | 25   | 23   |
| 2340 | 79.5  | 26   | 18   | 40   | 27   | 44   | 10   | 20   | 34   |
| 2341 | 82    | 35   | 24   | 30   | 42   | 33   | 11   | 22   | 29   |
| 2342 | 97.5  | 31.5 | 23   | 34   | 38   | 41.5 | 10   | 22   | 29   |
| 2343 | 76    | 23   | 20   | 28   | 29   | 30   | 10   | 19   | 38   |
| 2344 | 61    | 27.5 | 21   | 34   | 29   | 29   | 14   | 18   | 21   |
| 2345 | 58    | 10   | 8    | 24   | 9    | 11   | 5    | 9    | 44   |
| 2346 | 27.5  | 9    | 6    | 20   | 11   | 10   | 5    | 17   | 33   |
| 2347 | 78.5  | 28   | 18   | 29.5 | 29   | 43.5 | 9    | 19   | 37   |
| 2348 | 51.5  | 25   | 18   | 31.5 | 28   | 23   | 8.5  | 13.5 | 30   |

|      |      |      |      |      |      |      |      |      |      |
|------|------|------|------|------|------|------|------|------|------|
| 2349 | 69   | 25   | 17.5 | 30   | 27   | 30.5 | 7    | 19   | 40   |
| 2350 | 48   | 19.5 | 15.5 | 19   | 21   | 14   | 5    | 12   | 31   |
| 2351 | 48   | 19.5 | 15.5 | 19   | 21   | 14   | 5    | 12   | 31   |
| 2352 | 86   | 36   | 30   | 22   | 48   | 37   | 10   | 22   | 29   |
| 2353 | 45   | 27   | 16   | 24   | 31   | 18   | 6    | 15   | 33   |
| 2354 | 45   | 27   | 16   | 24   | 31   | 18   | 6    | 15   | 33   |
| 2355 | 49   | 23.5 | 15   | 21   | 25.5 | 20   | 9    | 16   | 15   |
| 2356 | 49   | 23.5 | 15   | 21   | 25.5 | 20   | 9    | 16   | 15   |
| 2357 | 59   | 24   | 17   | 14   | 24.5 | 15   | 5    | 13   | 16   |
| 2358 | 64   | 37   | 26   | 34   | 35   | 27   | 8    | 18   | 23   |
| 2359 | 54.5 | 26   | 18   | 27.5 | 27   | 16   | 10   | 17   | 27   |
| 2360 | 82   | 29   | 23   | 28   | 98   | 37   | 7    | 21   | 18   |
| 2361 | 43.5 | 23   | 16   | 16   | 63   | 8    | 7    | 14   | 16   |
| 2362 | 53.5 | 20   | 14   | 22   | 27   | 27   | 6    | 13   | 21   |
| 2363 | 50   | 41   | 25   | 41   | 36.5 | 16   | 25   | 17   | 14   |
| 2364 | 73   | 22   | 16   | 23   | 28   | 41   | 8    | 17   | 28   |
| 2365 | 73   | 22   | 16   | 23   | 28   | 41   | 8    | 17   | 28   |
| 2366 | 73   | 30   | 22   | 36   | 33   | 27.5 | 13   | 19   | 36.5 |
| 2367 | 93.5 | 30   | 21   | 34   | 32.5 | 43   | 13   | 19   | 20   |
| 2368 | 58   | 32   | 18   | 45   | 38   | 19.5 | 16   | 16   | 35   |
| 2369 | 64.5 | 32   | 19   | 27.5 | 35   | 19   | 7    | 16   | 22   |
| 2370 | 89   | 31   | 20   | 37   | 37   | 39   | 9.5  | 26   | 26   |
| 2371 | 103  | 34   | 22   | 37   | 42.5 | 56   | 10   | 24   | 47   |
| 2372 | 72.5 | 31   | 18.5 | 47   | 32   | 54   | 17   | 19   | 24   |
| 2373 | 75.5 | 22   | 16   | 27   | 27   | 42   | 7    | 17   | 13   |
| 2374 | 53.5 | 27.5 | 17   | 27   | 30   | 21.5 | 8    | 14   | 31   |
| 2375 | 89   | 29   | 24   | 32   | 31   | 39.5 | 15   | 25   | 46   |
| 2376 | 105  | 27   | 20.5 | 41   | 36   | 47.5 | 10.5 | 25   | 51   |
| 2377 | 76   | 29.5 | 21   | 28   | 34   | 37   | 10   | 26   | 26.5 |
| 2378 | 94   | 45   | 27   | 43   | 48.5 | 51   | 16   | 25   | 29   |
| 2379 | 65   | 38.5 | 23   | 30   | 37   | 27   | 10   | 23   | 17   |
| 2380 | 79   | 39   | 27   | 47   | 43   | 31   | 14   | 26   | 29   |
| 2381 | 65   | 28   | 17   | 25   | 28   | 15   | 11   | 16   | 71   |
| 2382 | 77.5 | 18.5 | 12   | 37.5 | 15   | 37   | 9    | 14   | 21   |
| 2383 | 73   | 15   | 12   | 40   | 17   | 34   | 14   | 14   | 24   |
| 2384 | 87   | 21.5 | 17   | 26.5 | 27   | 50   | 8    | 22   | 26   |
| 2385 | 50   | 28   | 20   | 33   | 28   | 15   | 9    | 16.5 | 11.5 |
| 2386 | 50   | 28   | 20   | 33   | 28   | 15   | 9    | 16.5 | 11.5 |
| 2387 | 48   | 23   | 17   | 26   | 28   | 14   | 6    | 14   | 61   |
| 2388 | 69.5 | 28   | 22   | 20.5 | 30.5 | 19   | 8    | 17   | 25   |
| 2389 | 47   | 27   | 16   | 31   | 28   | 13   | 8    | 13   | 42   |
| 2390 | 95.5 | 31   | 22   | 34   | 39   | 49.5 | 10   | 24   | 31   |
| 2391 | 63   | 26   | 20   | 28   | 35   | 24   | 7    | 15   | 20   |
| 2392 | 92.5 | 29.5 | 27   | 37   | 38   | 44   | 10   | 32.5 | 21   |
| 2393 | 87.5 | 34   | 23   | 27   | 34   | 39   | 11   | 20   | 23   |
| 2394 | 82   | 34   | 24   | 21   | 40   | 37.5 | 63   | 21   | 43   |
| 2395 | 49   | 31.5 | 21   | 22   | 34   | 12.5 | 8    | 17   | 31   |

|      |       |      |      |      |      |      |      |      |      |
|------|-------|------|------|------|------|------|------|------|------|
| 2396 | 92.5  | 33.5 | 24   | 39   | 46   | 41   | 12   | 23   | 31   |
| 2397 | 71    | 26   | 20   | 38   | 48   | 43   | 9    | 19   | 31.5 |
| 2398 | 73    | 35   | 23   | 65   | 38.5 | 52   | 19   | 21   | 52   |
| 2399 | 93    | 25   | 17   | 35   | 26.5 | 53   | 15   | 18   | 36   |
| 2400 | 86.5  | 26   | 18   | 33   | 30   | 41   | 10   | 19   | 33   |
| 2401 | 89    | 31   | 24   | 37.5 | 34   | 41.5 | 10   | 22   | 24   |
| 2402 | 76    | 34   | 27   | 38   | 39   | 32   | 41   | 24   | 47.5 |
| 2403 | 79    | 35   | 22   | 34.5 | 36   | 37.5 | 9.5  | 22   | 27   |
| 2404 | 120   | 49   | 31   | 53   | 48.5 | 72   | 15   | 32   | 37   |
| 2405 | 83    | 32   | 22.5 | 34   | 38   | 56   | 10   | 20   | 27   |
| 2406 | 118   | 29   | 33   | 33.5 | 41   | 72   | 19.5 | 28   | 26   |
| 2407 | 94    | 28   | 19   | 32   | 32   | 60   | 12   | 19   | 17   |
| 2408 | 71    | 40   | 20   | 53   | 50   | 42   | 21   | 18   | 40.5 |
| 2409 | 68.5  | 32   | 20   | 25.5 | 37   | 25   | 8    | 20   | 26   |
| 2410 | 83    | 28   | 20   | 35   | 40   | 42   | 10   | 20   | 25.5 |
| 2411 | 96    | 39   | 24.5 | 73   | 40   | 39.5 | 51   | 19   | 27   |
| 2412 | 106.5 | 27   | 25   | 32   | 39   | 19   | 13   | 17   | 31   |
| 2413 | 101   | 31   | 29   | 34.5 | 28   | 54   | 9    | 19   | 24   |
| 2414 | 89.5  | 38   | 25   | 34   | 48   | 33   | 10   | 24   | 30   |
| 2415 | 90    | 32   | 23.5 | 44   | 32   | 44.5 | 11   | 22   | 51   |
| 2416 | 82    | 30   | 21   | 38.5 | 31   | 39   | 12   | 25.5 | 24.5 |
| 2417 | 92    | 21.5 | 14   | 55   | 18   | 52   | 11   | 20   | 27   |
| 2418 | 72    | 13.5 | 11   | 32.5 | 14   | 34   | 8    | 12   | 16   |
| 2419 | 65.5  | 27   | 20   | 31   | 48   | 39   | 9    | 16   | 25   |
| 2420 | 76.5  | 23   | 20.5 | 27   | 23   | 42   | 8    | 16   | 22   |
| 2421 | 76.5  | 23   | 20.5 | 27   | 23   | 42   | 8    | 16   | 22   |
| 2422 | 48    | 26   | 20   | 14   | 30   | 13   | 7    | 15   | 15   |
| 2423 | 62.5  | 25   | 17   | 30   | 85   | 38   | 7    | 16   | 29   |
| 2424 | 62.5  | 25   | 17   | 30   | 85   | 38   | 7    | 16   | 29   |
| 2425 | 87.5  | 36   | 22   | 34   | 33.5 | 32.5 | 8    | 21   | 28   |
| 2426 | 102.5 | 24.5 | 16   | 28   | 29   | 51   | 6    | 17   | 31   |
| 2427 | 57.5  | 25   | 17   | 25   | 28   | 20   | 7    | 14   | 55   |
| 2428 | 99    | 29   | 17   | 46   | 32   | 50   | 44   | 20   | 39   |
| 2429 | 76    | 35   | 21   | 34   | 41   | 36   | 14   | 23   | 26   |
| 2430 | 78    | 33   | 26   | 36   | 45.5 | 37.5 | 11   | 23   | 32   |
| 2431 | 68.5  | 37   | 25   | 31   | 43.5 | 19   | 11   | 18   | 26   |
| 2432 | 53    | 32   | 20   | 24   | 30   | 16   | 32   | 15   | 27   |
| 2433 | 79    | 26   | 18   | 30   | 30   | 39   | 20   | 19   | 51   |
| 2434 | 77    | 35   | 20   | 32   | 55.5 | 38   | 11   | 20   | 32   |
| 2435 | 41    | 19   | 9    | 20.5 | 28   | 19   | 9    | 17   | 23   |
| 2436 | 52.5  | 27   | 17   | 18   | 29   | 15   | 7    | 15   | 35   |
| 2437 | 77    | 32   | 23   | 33   | 36   | 39   | 17   | 24   | 43   |
| 2438 | 63    | 39   | 26   | 46   | 30   | 25   | 51.5 | 14   | 29.5 |
| 2439 | 69    | 30.5 | 21   | 32   | 39.5 | 29   | 13   | 18   | 29   |
| 2440 | 72.5  | 26   | 24   | 30   | 31   | 37   | 9    | 18   | 33   |
| 2441 | 109   | 36   | 34   | 53.5 | 34   | 53   | 14   | 26   | 29   |
| 2442 | 85    | 15   | 12   | 36   | 22   | 50   | 10.5 | 19   | 32   |

|      |      |      |      |      |      |      |      |      |      |
|------|------|------|------|------|------|------|------|------|------|
| 2443 | 60   | 15   | 11   | 33   | 14.5 | 29   | 10   | 12   | 19   |
| 2444 | 41   | 28   | 20   | 29.5 | 30   | 14.5 | 8    | 15   | 30   |
| 2445 | 60   | 24   | 19   | 27   | 25   | 25   | 15   | 16   | 33   |
| 2446 | 59   | 25   | 16.5 | 20   | 28   | 18   | 6    | 14   | 21   |
| 2447 | 84.5 | 26   | 21   | 40   | 31.5 | 44   | 47   | 19.5 | 64   |
| 2448 | 99   | 29   | 19   | 32   | 39   | 49.5 | 10   | 19.5 | 15   |
| 2449 | 71.5 | 35   | 24   | 39   | 40   | 24.5 | 11   | 22   | 26   |
| 2450 | 67   | 24   | 20   | 30.5 | 24   | 19   | 7    | 15   | 23.5 |
| 2451 | 67   | 24   | 20   | 30.5 | 24   | 19   | 7    | 15   | 23.5 |
| 2452 | 60   | 29   | 19   | 24.5 | 31   | 21   | 9    | 17   | 26   |
| 2453 | 101  | 26   | 17   | 25   | 27   | 41   | 7    | 17   | 39.5 |
| 2454 | 69   | 44   | 28   | 42   | 42   | 24   | 12   | 19   | 44   |
| 2455 | 75   | 39   | 24   | 31   | 38   | 48.5 | 13   | 22   | 30   |
| 2456 | 65.5 | 35   | 23   | 32.5 | 39   | 23   | 9    | 16   | 51.5 |
| 2457 | 63   | 33   | 25   | 28   | 51   | 16   | 11   | 17   | 27   |
| 2458 | 97.5 | 35   | 24   | 51   | 41.5 | 47   | 12.5 | 24   | 25   |
| 2459 | 87   | 32   | 20   | 40   | 37   | 41   | 32   | 28   | 35.5 |
| 2460 | 83.5 | 30   | 23   | 31   | 39   | 44   | 11   | 21   | 24   |
| 2461 | 43   | 67   | 66   | 82   | 57   | 48   | 58   | 66   | 62   |
| 2462 | 64   | 22.5 | 15.5 | 25   | 34   | 39.5 | 10   | 15   | 42   |
| 2463 | 57   | 30   | 24   | 22   | 37   | 14   | 12   | 20   | 21   |
| 2464 | 69   | 22   | 17   | 27   | 30   | 28   | 10.5 | 16   | 19   |
| 2465 | 54   | 30.5 | 17   | 87   | 33   | 13   | 13   | 15   | 19   |
| 2466 | 79   | 30   | 21   | 27   | 33   | 25   | 10   | 18   | 18   |
| 2467 | 63   | 27   | 18   | 39   | 30   | 29   | 9    | 20   | 41   |
| 2468 | 67   | 27   | 20   | 55   | 29   | 30   | 10   | 16   | 32   |
| 2469 | 97   | 44   | 29   | 57   | 52   | 49   | 14   | 32   | 28.5 |
| 2470 | 48.5 | 28   | 18   | 23   | 28.5 | 11   | 31   | 14   | 26   |
| 2471 | 49   | 57   | 31   | 55   | 36   | 24   | 13.5 | 15   | 29   |
| 2472 | 69   | 79   | 74   | 79   | 72   | 47   | 53   | 65   | 73   |
| 2473 | 70   | 23   | 17   | 21   | 25   | 32   | 10   | 16   | 16   |
| 2474 | 95   | 47   | 36   | 54   | 53   | 47   | 19   | 30   | 42   |
| 2475 | 82   | 42   | 27.5 | 40.5 | 44   | 39   | 67   | 21   | 31   |
| 2476 | 126  | 27   | 20   | 32   | 33   | 57.5 | 9    | 21.5 | 21   |
| 2477 | 54   | 28   | 16   | 21   | 280  | 17   | 6    | 14   | 20.5 |
| 2478 | 73   | 12   | 9.5  | 25   | 16   | 40   | 7.5  | 13   | 23   |
| 2479 | 81   | 13   | 10   | 31   | 19   | 42.5 | 11   | 13   | 51   |
| 2480 | 91   | 33   | 22   | 35   | 43   | 43   | 10   | 19   | 51   |
| 2481 | 71   | 27.5 | 20   | 24   | 32   | 31   | 11   | 19   | 28   |
| 2482 | 84   | 41   | 30   | 30   | 43.5 | 44   | 19   | 29   | 55   |
| 2483 | 96   | 34   | 22   | 25   | 39   | 56.5 | 9    | 25   | 19   |
| 2484 | 51.5 | 30   | 21   | 19   | 32   | 13   | 6    | 17   | 26   |
| 2485 | 50   | 21   | 17   | 31   | 27   | 16   | 11   | 14   | 20   |
| 2486 | 58   | 29   | 15   | 35   | 25   | 16   | 7    | 16   | 27   |
| 2487 | 57   | 28   | 20   | 25   | 28   | 12   | 9    | 13   | 15   |
| 2488 | 86.5 | 30   | 19   | 28   | 36   | 43   | 9    | 20   | 26   |
| 2489 | 66.5 | 12   | 11.5 | 25.5 | 13   | 35.5 | 10   | 10   | 16   |

|      |       |      |      |      |      |      |     |      |      |
|------|-------|------|------|------|------|------|-----|------|------|
| 2490 | 51    | 27   | 19   | 26   | 31.5 | 24   | 9   | 17   | 15   |
| 2491 | 74.5  | 25   | 20   | 32.5 | 34.5 | 32.5 | 9   | 19   | 26   |
| 2492 | 69    | 30   | 23   | 24   | 40   | 17   | 8   | 16   | 17   |
| 2493 | 36    | 23   | 18   | 25   | 28   | 11   | 9   | 14   | 20   |
| 2494 | 57    | 27   | 15   | 27   | 29.5 | 22   | 8   | 18   | 20   |
| 2495 | 36    | 29   | 28   | 47   | 33   | 13.5 | 9   | 19   | 40.5 |
| 2496 | 75    | 37   | 20   | 29   | 35   | 32   | 10  | 19   | 24   |
| 2497 | 102   | 34   | 23.5 | 43.5 | 43   | 58   | 13  | 33   | 52   |
| 2498 | 88    | 36.5 | 27   | 37   | 43   | 70   | 17  | 24   | 33.5 |
| 2499 | 100   | 35   | 22   | 45   | 39   | 56   | 12  | 27   | 44.5 |
| 2500 | 98    | 29   | 22   | 34   | 35   | 51   | 24  | 20   | 32   |
| 2501 | 58.5  | 22   | 21   | 23   | 25   | 22   | 9   | 13   | 18   |
| 2502 | 92    | 29   | 28   | 52   | 39   | 48   | 13  | 21   | 40   |
| 2503 | 95.5  | 30   | 21   | 33   | 32   | 38   | 9   | 21   | 41   |
| 2504 | 75    | 34   | 20   | 30   | 28.5 | 32   | 10  | 20   | 19   |
| 2505 | 77    | 86   | 93   | 79   | 79   | 67   | 75  | 90   | 86   |
| 2506 | 101   | 32   | 23   | 47   | 34   | 52   | 12  | 26   | 29   |
| 2507 | 39.5  | 13   | 14   | 33.5 | 11   | 15   | 9   | 9    | 19   |
| 2508 | 51    | 12   | 9    | 24   | 10   | 26.5 | 8   | 8.5  | 24   |
| 2509 | 94    | 26   | 18   | 29.5 | 43   | 31   | 12  | 21   | 25   |
| 2510 | 40    | 27   | 17   | 25   | 24.5 | 16   | 6   | 13   | 14   |
| 2511 | 40    | 27   | 17   | 25   | 24.5 | 16   | 6   | 13   | 14   |
| 2512 | 70.5  | 40   | 26.5 | 42   | 42   | 17   | 12  | 20   | 27   |
| 2513 | 82    | 34.5 | 21   | 34   | 37   | 30   | 10  | 19   | 22   |
| 2514 | 50    | 27   | 42   | 202  | 27   | 28   | 9.5 | 15   | 51   |
| 2515 | 82.5  | 33.5 | 22.5 | 32   | 38   | 47.5 | 11  | 25   | 26   |
| 2516 | 126   | 31   | 25   | 36   | 34   | 63.5 | 13  | 25   | 28   |
| 2517 | 96    | 31   | 18   | 35   | 36   | 41   | 8   | 23   | 22   |
| 2518 | 60    | 28   | 19   | 22   | 32   | 16   | 6   | 18   | 48   |
| 2519 | 60    | 28   | 19   | 22   | 32   | 16   | 6   | 18   | 48   |
| 2520 | 76    | 31   | 27   | 38   | 38   | 29.5 | 10  | 20   | 44   |
| 2521 | 94    | 36   | 23   | 36   | 47   | 42   | 11  | 23   | 26   |
| 2522 | 94    | 33   | 23   | 36   | 37.5 | 41   | 11  | 22   | 27.5 |
| 2523 | 96.5  | 26   | 21   | 32   | 33   | 44   | 9   | 19   | 17   |
| 2524 | 109   | 37   | 19   | 48   | 38   | 55   | 11  | 21   | 36   |
| 2525 | 91    | 33   | 25   | 52   | 44   | 62.5 | 14  | 22.5 | 27   |
| 2526 | 118   | 31   | 18   | 32   | 32.5 | 64   | 16  | 21   | 30   |
| 2527 | 87    | 28   | 20   | 35   | 31   | 44.5 | 10  | 21   | 20.5 |
| 2528 | 59    | 29   | 24   | 20   | 39   | 11   | 10  | 17   | 14   |
| 2529 | 78.5  | 29.5 | 21   | 28   | 36   | 43   | 15  | 25   | 23   |
| 2530 | 52    | 27   | 18   | 25   | 36   | 20.5 | 8   | 16.5 | 21   |
| 2531 | 111.5 | 37   | 25   | 48   | 44   | 48   | 12  | 43.5 | 30   |
| 2532 | 42    | 13   | 9    | 17   | 69.5 | 17   | 7   | 8    | 17   |
| 2533 | 69.5  | 15.5 | 9    | 28   | 15   | 29   | 8   | 8    | 86   |
| 2534 | 44    | 36   | 28   | 49   | 38   | 16   | 16  | 19   | 66   |
| 2535 | 67    | 28   | 19   | 27   | 32   | 35   | 9   | 17   | 26   |
| 2536 | 77    | 20   | 18   | 37   | 23   | 33   | 7   | 44.5 | 19   |



|      |       |      |    |      |      |      |      |      |      |
|------|-------|------|----|------|------|------|------|------|------|
| 2537 | 75.5  | 21   | 16 | 25   | 23   | 30   | 9    | 14   | 22   |
| 2538 | 75.5  | 21   | 16 | 25   | 23   | 30   | 9    | 14   | 22   |
| 2539 | 99.5  | 30   | 26 | 41   | 41   | 48.5 | 15   | 25   | 35   |
| 2540 | 109   | 26   | 18 | 34   | 29   | 52   | 11   | 23   | 22   |
| 2541 | 127   | 39.5 | 26 | 37   | 49   | 53.5 | 13   | 25   | 29   |
| 2542 | 88.5  | 37   | 25 | 37.5 | 77   | 47.5 | 12   | 22   | 27   |
| 2543 | 85    | 25   | 19 | 27   | 30   | 45   | 11   | 19   | 28   |
| 2544 | 32    | 18   | 14 | 27   | 21.5 | 11   | 6    | 11   | 10   |
| 2545 | 101   | 29   | 20 | 39   | 30.5 | 53   | 10   | 22   | 23   |
| 2546 | 70    | 62   | 75 | 86   | 61   | 66   | 86   | 72   | 78   |
| 2547 | 99    | 30   | 22 | 30   | 36   | 49   | 10   | 26   | 22   |
| 2548 | 89    | 25.5 | 21 | 34   | 30.5 | 37.5 | 11   | 20.5 | 30   |
| 2549 | 174   | 15   | 12 | 29   | 11   | 63   | 9    | 12   | 13.5 |
| 2550 | 64    | 85   | 74 | 106  | 73   | 62   | 79   | 83   | 76   |
| 2551 | 51.5  | 32   | 18 | 23   | 30.5 | 14   | 5    | 18   | 12   |
| 2552 | 73    | 28.5 | 22 | 19   | 32   | 29   | 8    | 19   | 18   |
| 2553 | 51.5  | 32   | 18 | 23   | 30.5 | 14   | 5    | 18   | 12   |
| 2554 | 73    | 28.5 | 22 | 19   | 32   | 29   | 8    | 19   | 18   |
| 2555 | 58    | 34   | 21 | 30.5 | 33.5 | 16.5 | 8    | 16   | 27   |
| 2556 | 40    | 27   | 9  | 27   | 26   | 7    | 6.5  | 15   | 29   |
| 2557 | 117   | 38   | 24 | 39   | 37.5 | 68.5 | 13   | 25   | 21.5 |
| 2558 | 85    | 30   | 20 | 35   | 41   | 47   | 9    | 22   | 51.5 |
| 2559 | 79    | 29   | 22 | 39   | 32   | 28   | 10   | 18   | 37   |
| 2560 | 92    | 26.5 | 19 | 30   | 30   | 53   | 10   | 21   | 41.5 |
| 2561 | 129   | 42.5 | 28 | 46   | 41   | 55   | 14.5 | 27.5 | 55   |
| 2562 | 72    | 33   | 23 | 52   | 32   | 35   | 11   | 19   | 24   |
| 2563 | 106.5 | 28   | 20 | 44   | 34   | 48   | 11   | 20   | 23   |
| 2564 | 106.5 | 28   | 20 | 44   | 34   | 48   | 11   | 20   | 23   |
| 2565 | 72    | 29   | 25 | 57   | 29.5 | 28   | 8    | 17   | 19   |
| 2566 | 110   | 30   | 23 | 45   | 32   | 51   | 9.5  | 20   | 31   |
| 2567 | 68.5  | 25   | 19 | 23   | 28   | 29.5 | 7    | 18   | 15   |
| 2568 | 86    | 29   | 22 | 30   | 33   | 36   | 10   | 21.5 | 32   |
| 2569 | 64.5  | 35   | 22 | 50   | 33   | 25   | 9    | 18   | 29   |
| 2570 | 70    | 39   | 29 | 21   | 41   | 22   | 9    | 22   | 31.5 |
| 2571 | 76    | 34   | 27 | 36   | 40   | 27   | 7    | 20.5 | 27   |
| 2572 | 123   | 29.5 | 28 | 34   | 46   | 50.5 | 10   | 20.5 | 44   |
| 2573 | 59    | 33.5 | 22 | 26   | 34   | 19   | 10   | 15   | 25   |
| 2574 | 53    | 30   | 18 | 18.5 | 28   | 13   | 5    | 14.5 | 36   |
| 2575 | 81    | 37   | 26 | 31   | 44   | 36   | 13   | 22   | 28   |
| 2576 | 121   | 35   | 25 | 34   | 48   | 52.5 | 15   | 29   | 39   |
| 2577 | 115   | 29.5 | 21 | 45   | 44   | 54   | 10   | 54   | 37.5 |
| 2578 | 53    | 31   | 22 | 27   | 36   | 18   | 7    | 17   | 16   |
| 2579 | 86.5  | 28   | 19 | 32   | 32   | 46.5 | 10   | 21   | 19   |
| 2580 | 76.5  | 28   | 20 | 41   | 32   | 38   | 12   | 17   | 32   |
| 2581 | 75    | 30   | 21 | 24   | 33   | 35   | 12   | 19   | 44.5 |
| 2582 | 66.5  | 28   | 22 | 31   | 32   | 35   | 12   | 19   | 48   |
| 2583 | 99    | 27   | 18 | 30   | 35   | 47   | 9    | 21   | 28   |

|      |       |       |      |      |      |      |      |      |      |
|------|-------|-------|------|------|------|------|------|------|------|
| 2584 | 86    | 30    | 24   | 39   | 37   | 47   | 12.5 | 27   | 59   |
| 2585 | 113   | 33    | 26   | 39   | 38.5 | 55   | 13   | 26   | 30.5 |
| 2586 | 102   | 29    | 21   | 32.5 | 32   | 45.5 | 9    | 22.5 | 22   |
| 2587 | 92    | 27    | 19   | 33   | 30   | 39.5 | 13   | 20   | 39   |
| 2588 | 16    | 7     | 5    | 8    | 6    | 13.5 | 4    | 6    | 6    |
| 2589 | 52    | 71    | 27   | 81   | 36   | 38.5 | 55   | 21   | 164  |
| 2590 | 106   | 28    | 21   | 37   | 31   | 53   | 9    | 23   | 19   |
| 2591 | 66    | 13    | 16   | 48   | 13   | 28   | 8    | 11   | 11   |
| 2592 | 116   | 39    | 30   | 25   | 45   | 50   | 11   | 23   | 22   |
| 2593 | 80    | 34.5  | 26   | 63.5 | 31.5 | 33   | 17.5 | 21   | 26   |
| 2594 | 99    | 35.5  | 30   | 39.5 | 41   | 45   | 11   | 22   | 38   |
| 2595 | 85    | 28    | 22   | 38   | 36   | 43.5 | 20   | 24   | 34   |
| 2596 | 102   | 71.5  | 44   | 83   | 99.5 | 67   | 89   | 37   | 52   |
| 2597 | 80    | 258.5 | 84.5 | 142  | 90   | 79   | 35   | 20   | 28   |
| 2598 | 38.5  | 24    | 18.5 | 14   | 27   | 8    | 8    | 14   | 26.5 |
| 2599 | 117.5 | 12    | 9    | 29   | 12   | 36.5 | 117  | 12   | 27   |
| 2600 | 82    | 30    | 21.5 | 44   | 34   | 31.5 | 17   | 19   | 27   |
| 2601 | 62    | 26    | 17   | 24   | 28   | 30   | 8    | 16   | 32   |
| 2602 | 61    | 26.5  | 15   | 17   | 27.5 | 14   | 14   | 16   | 43   |
| 2603 | 103.5 | 26    | 17   | 27   | 41   | 53.5 | 10   | 20   | 24   |
| 2604 | 99    | 31    | 23   | 42   | 34   | 29   | 10   | 18   | 35   |
| 2605 | 81    | 31    | 23   | 37   | 40   | 44.5 | 11   | 22   | 34   |
| 2606 | 131   | 30    | 22   | 35   | 53   | 69   | 13   | 21.5 | 18   |
| 2607 | 56    | 37    | 23   | 43   | 39   | 25   | 10   | 18   | 42   |
| 2608 | 60    | 28    | 20   | 28   | 56   | 21   | 7.5  | 14.5 | 13   |
| 2609 | 92.5  | 40.5  | 27.5 | 42   | 49   | 46.5 | 17   | 28.5 | 58   |
| 2610 | 74    | 15    | 11   | 32   | 18   | 38   | 11   | 47   | 19   |
| 2611 | 66.5  | 17    | 13   | 38   | 15   | 40   | 10   | 20   | 22   |
| 2612 | 38    | 11.5  | 7    | 24   | 12   | 20.5 | 7    | 8    | 17   |
| 2613 | 137   | 41    | 25.5 | 28   | 46   | 102  | 12   | 27   | 33   |
| 2614 | 93    | 31    | 24   | 44   | 36   | 38   | 13   | 21.5 | 39   |
| 2615 | 49    | 26    | 19   | 22   | 48   | 17   | 12   | 15.5 | 30   |
| 2616 | 92.5  | 37    | 23   | 42   | 41   | 49   | 14   | 24.5 | 28.5 |
| 2617 | 140   | 40.5  | 31   | 38   | 51   | 57   | 15   | 31   | 35.5 |
| 2618 | 71    | 29    | 21   | 32   | 35   | 28   | 11   | 21   | 23   |
| 2619 | 60    | 27    | 20   | 33   | 26   | 15.5 | 17   | 14   | 24   |
| 2620 | 55    | 27    | 19   | 25   | 28   | 26   | 9    | 18.5 | 17   |
| 2621 | 101   | 25    | 21   | 29   | 31   | 57.5 | 9    | 23   | 19   |
| 2622 | 80.5  | 24    | 18   | 26   | 30   | 43   | 9    | 21   | 29   |
| 2623 | 39.5  | 18    | 18   | 21   | 17   | 22   | 13   | 8    | 22   |
| 2624 | 85.5  | 30    | 19   | 27   | 33   | 26   | 7    | 20   | 21   |
| 2625 | 85    | 33    | 20   | 49   | 34   | 47   | 13   | 20   | 24   |
| 2626 | 33    | 26    | 17   | 30   | 25   | 8    | 6    | 11   | 23   |
| 2627 | 102   | 35    | 25   | 49   | 37   | 39   | 10   | 27   | 28.5 |
| 2628 | 79    | 33.5  | 27   | 54.5 | 40   | 35   | 18   | 26   | 61   |
| 2629 | 67    | 28    | 19   | 25   | 32   | 25   | 7    | 17.5 | 20   |
| 2630 | 54    | 85    | 67   | 101  | 64   | 52   | 62   | 76   | 60   |

|      |       |      |      |      |      |      |    |      |      |
|------|-------|------|------|------|------|------|----|------|------|
| 2631 | 61    | 31   | 19   | 38   | 38   | 11.5 | 9  | 17   | 25   |
| 2632 | 100.5 | 26   | 20   | 32   | 32   | 51   | 9  | 23   | 29   |
| 2633 | 83.5  | 35   | 24   | 41   | 40   | 43   | 14 | 26   | 42.5 |
| 2634 | 142.5 | 31   | 23   | 38   | 38   | 71   | 16 | 27.5 | 33   |
| 2635 | 131.5 | 33   | 38   | 35.5 | 44   | 49   | 16 | 24   | 27   |
| 2636 | 104   | 34   | 42.5 | 66   | 33   | 47   | 11 | 22.5 | 32   |
| 2637 | 82.5  | 17   | 17   | 34   | 18   | 35.5 | 12 | 18   | 33.5 |
| 2638 | 68    | 15   | 19   | 35   | 18   | 35   | 12 | 20   | 37   |
| 2639 | 31.5  | 10   | 8    | 30   | 10   | 10   | 8  | 8    | 21   |
| 2640 | 112   | 45.5 | 34   | 41   | 57   | 59   | 20 | 31   | 48   |
| 2641 | 83.5  | 30   | 24   | 23   | 37   | 41   | 11 | 26   | 29   |
| 2642 | 51.5  | 23   | 17   | 18   | 22   | 11   | 7  | 14   | 8    |
| 2643 | 75    | 31   | 22   | 30   | 32   | 25   | 10 | 19   | 33   |
| 2644 | 97    | 32   | 19   | 31   | 33   | 40   | 10 | 24   | 26   |
| 2645 | 114   | 30   | 23   | 43   | 33   | 54   | 12 | 23   | 23   |
| 2646 | 286   | 32   | 22   | 35   | 37.5 | 104  | 10 | 24.5 | 43   |
| 2647 | 82    | 25   | 18   | 27   | 30   | 35   | 8  | 17   | 28   |
| 2648 | 90.5  | 35.5 | 23   | 41   | 38   | 37   | 10 | 28   | 21   |
| 2649 | 101   | 47   | 27   | 60.5 | 43   | 73   | 23 | 21   | 32   |
| 2650 | 100   | 36   | 22.5 | 38   | 39   | 46   | 14 | 23   | 25   |
| 2651 | 77.5  | 24   | 17   | 25   | 40   | 44   | 10 | 16   | 43   |
| 2652 | 113   | 33   | 27   | 35   | 35.5 | 60   | 16 | 28   | 33   |
| 2653 | 51    | 9    | 9    | 24   | 11   | 25   | 8  | 9    | 26.5 |
| 2654 | 84    | 28   | 16   | 40   | 25   | 31   | 7  | 16   | 38   |
| 2655 | 87    | 39   | 26   | 29   | 42   | 20   | 10 | 20   | 37   |
| 2656 | 64    | 28   | 16   | 11.5 | 28   | 8    | 5  | 16   | 29   |
| 2657 | 64    | 28   | 16   | 11.5 | 28   | 8    | 5  | 16   | 29   |
| 2658 | 53    | 23   | 18   | 23   | 26   | 17   | 8  | 14   | 18   |
| 2659 | 53    | 23   | 18   | 23   | 26   | 17   | 8  | 14   | 18   |
| 2660 | 125   | 33   | 26   | 35   | 38   | -1   | -1 | 26   | -1   |
| 2661 | 90    | 28.5 | 23   | 34   | 30   | 46   | 15 | 23   | 20   |
| 2662 | 46    | 30   | 21   | 29   | 32.5 | 13   | 9  | 17   | 13   |
| 2663 | 70    | 32   | 26   | 36   | 36   | 28.5 | 24 | 17   | 44   |
| 2664 | 65    | 28   | 17   | 27   | 26.5 | 20   | 8  | 13   | 28   |
| 2665 | 99.5  | 29   | 22   | 34.5 | 28.5 | 44   | 18 | 17   | 20   |
| 2666 | 107   | 36   | 23   | 36   | 40   | 54.5 | 11 | 24   | 28   |
| 2667 | 106   | 14   | 11   | 24   | 17   | 51.5 | 10 | 17   | 18   |
| 2668 | 65    | 31   | 23   | 30   | 42   | 23   | 10 | 18   | 29   |
| 2669 | 95    | 32   | 20   | 36   | 31   | 58   | 15 | 22   | 46   |
| 2670 | 67    | 23   | 18   | 26   | 29   | 14.5 | 10 | 13   | 40.5 |
| 2671 | 83    | 28   | 19   | 26   | 26   | 38   | 9  | 17   | 33   |
| 2672 | 80.5  | 28   | 18   | 38   | 30   | 31   | 6  | 16   | 23   |
| 2673 | 80.5  | 28   | 18   | 38   | 30   | 31   | 6  | 16   | 23   |
| 2674 | 51    | 22   | 17   | 93   | 42   | 18   | 12 | 14   | 23.5 |
| 2675 | 141   | 38   | 32   | 46   | 51   | 65.5 | 18 | 32   | 38   |
| 2676 | 97    | 30   | 22.5 | 44   | 35   | 53   | 14 | 26   | 27   |
| 2677 | 31    | 14   | 9    | 30   | 12   | 13   | 7  | 9    | 83   |

|      |       |       |      |      |      |      |      |      |      |
|------|-------|-------|------|------|------|------|------|------|------|
| 2678 | 44    | 23    | 16   | 29   | 24   | 10   | 8    | 12   | 28   |
| 2679 | 137   | 29    | 20.5 | 34   | 33   | 62   | 8    | 21   | 23   |
| 2680 | 86    | 35    | 25   | 27   | 39   | 47.5 | 8    | 22   | 33.5 |
| 2681 | 47    | 168.5 | 26   | 182  | 33   | 36.5 | 27.5 | 18   | 32   |
| 2682 | 86    | 27    | 19   | 35   | 36   | 43.5 | 10   | 20   | 21.5 |
| 2683 | 111   | 24    | 21   | 36   | 33   | 63   | 12   | 25   | 27   |
| 2684 | 97    | 27    | 22   | 35   | 26   | 50.5 | 11   | 19   | 90   |
| 2685 | 74    | 23    | 18   | 30   | 26   | 29   | 6    | 17   | 21   |
| 2686 | 130   | 19    | 13   | 36   | 18.5 | 53   | 13   | 17   | 22   |
| 2687 | 99    | 18    | 15.5 | 36   | 19   | 44.5 | 12   | 19   | 47   |
| 2688 | 105   | 31    | 20   | 35   | 32   | 69.5 | 11   | 29   | 57   |
| 2689 | 72    | 31    | 23   | 18   | 34   | 25   | 9    | 18   | 17   |
| 2690 | 113   | 37    | 26   | 33   | 48   | 52   | 13.5 | 29.5 | 44   |
| 2691 | 137.5 | 35    | 25   | 35   | 43.5 | 60.5 | 12   | 26   | 24   |
| 2692 | 102   | 28    | 27   | 36   | 38   | 53.5 | 12   | 21   | 37   |
| 2693 | 79    | 32    | 18.5 | 31   | 30.5 | 29   | 8    | 20   | 27.5 |
| 2694 | 69    | 33    | 24   | 25   | 38   | 21   | 13   | 18   | 77   |
| 2695 | 56    | 35    | 21   | 35   | 33.5 | 25   | 9    | 16   | 29   |
| 2696 | 171.5 | 39    | 26   | 45   | 48   | 80.5 | 13   | 35   | 30   |
| 2697 | 67    | 28    | 19   | 23   | 36   | 34   | 7    | 17   | 29   |
| 2698 | 59    | 22    | 18   | 21   | 31   | 18.5 | 8    | 16   | 22   |
| 2699 | 119   | 30    | 21   | 41   | 34   | 56   | 12   | 26   | 30   |
| 2700 | 79.5  | 32    | 17   | 24   | 28   | 34   | 8    | 19   | 29   |
| 2701 | 83.5  | 23    | 20   | 24   | 28   | 35   | 8    | 19   | 22   |
| 2702 | 105   | 28    | 20   | 31   | 32   | 45   | 11   | 21   | 47   |
| 2703 | 40    | 26    | 23   | 16   | 29   | 12   | 8    | 16   | 9    |
| 2704 | 42    | 9     | 7    | 22   | 12.5 | 13   | 5    | 6    | 21   |
| 2705 | 64.5  | 12    | 9    | 24   | 16   | 38   | 7    | 11   | 22.5 |
| 2706 | 123   | 31    | 23   | 25   | 37   | 60.5 | 10   | 28   | 44.5 |
| 2707 | 60    | 28    | 20   | 24   | 29   | 17   | 16   | 14   | 54   |
| 2708 | 114   | 26    | 22   | 32   | 30   | 46   | 10   | 23   | 25   |
| 2709 | 137   | 31    | 21   | 32   | 43   | 61.5 | 9    | 24   | 22   |
| 2710 | 74.5  | 22    | 18   | 21   | 24   | 33   | 9    | 16   | 37   |
| 2711 | 71.5  | 34    | 19.5 | 30   | 31   | 33   | 9    | 17   | 28   |
| 2712 | 152   | 30    | 23   | 31   | 37.5 | 80   | 9.5  | 21   | 36   |
| 2713 | 85    | 32    | 23   | 47   | 31   | 46   | 12   | 21   | 60   |
| 2714 | 65.5  | 33    | 21   | 34   | 36   | 21   | 10   | 17   | 29   |
| 2715 | 73    | 40    | 25   | 60   | 31   | 23.5 | 14   | 16   | 133  |
| 2716 | 73    | 31    | 34   | 37   | 32.5 | 21   | 10   | 16   | 16   |
| 2717 | 126   | 40    | 31   | 41   | 49   | 56.5 | 17   | 35   | 40   |
| 2718 | 117   | 46.5  | 32   | 46   | 53.5 | 60.5 | 16   | 30   | 41   |
| 2719 | 59    | 59    | 65   | 78   | 68   | 61   | 65   | 75   | 60   |
| 2720 | 106   | 29    | 24   | 37   | 36   | 46   | 12   | 21   | 20   |
| 2721 | 61    | 15    | 14   | 25.5 | 11   | 17   | 10   | 9    | 23   |
| 2722 | 56    | 13    | 8    | 26.5 | 9    | 22.5 | 8    | 10   | 23   |
| 2723 | 81    | 33    | 24   | 20   | 42   | 28   | 7    | 20   | 18   |
| 2724 | 150   | 37    | 27   | 29.5 | 43   | 88   | 10.5 | 26   | 24.5 |

|      |       |      |      |      |      |      |      |      |      |
|------|-------|------|------|------|------|------|------|------|------|
| 2725 | 117   | 31.5 | 22.5 | 18   | 32   | 45   | 9    | 21   | 19   |
| 2726 | 82    | 32   | 19.5 | 26   | 33   | 26   | 8    | 20   | 21   |
| 2727 | 82    | 32   | 19.5 | 26   | 33   | 26   | 8    | 20   | 21   |
| 2728 | 54.5  | 23   | 16   | 20   | 24   | 19   | 5    | 14   | 31   |
| 2729 | 54.5  | 23   | 16   | 20   | 24   | 19   | 5    | 14   | 31   |
| 2730 | 120.5 | 30   | 20   | 26   | 28   | 47   | 7    | 20   | 26   |
| 2731 | 59    | 28   | 21   | 23   | 30   | 18.5 | 10   | 18   | 23   |
| 2732 | 111.5 | 34   | 27   | 49.5 | 35   | 59   | 20   | 28   | 32   |
| 2733 | 48.5  | 10   | 8    | 20   | 9    | 9    | 6    | 6    | 22   |
| 2734 | 81.5  | 22   | 15   | 26   | 31   | 34.5 | 11   | 17   | 36   |
| 2735 | 45    | 10   | 15   | 15   | 18   | 32   | 8    | 20   | 16   |
| 2736 | 103   | 23   | 21   | 32   | 30   | 55   | 10.5 | 19   | 19   |
| 2737 | 102.5 | 34   | 34   | 33.5 | 42   | 41.5 | 16   | 28   | 28   |
| 2738 | 93    | 26   | 22   | 27   | 32   | 35.5 | 12   | 22   | 37   |
| 2739 | 89    | 28   | 22   | 32   | 35   | 29   | 10   | 20   | 22.5 |
| 2740 | 115.5 | 33   | 24   | 52   | 38   | 53   | 16   | 29   | 28   |
| 2741 | 96    | 40   | 29   | 48   | 47   | 44.5 | 17   | 29.5 | 38   |
| 2742 | 124.5 | 33   | 24.5 | 46   | 40   | 67.5 | 14   | 34   | 28   |
| 2743 | 120   | 33   | 23   | 37   | 37.5 | 70   | 11   | 25   | 19   |
| 2744 | 65.5  | 14   | 15   | 37   | 11   | 24   | 10   | 10   | 18   |
| 2745 | 49    | 10   | 7.5  | 22   | 9    | 17   | 5    | 7    | 16   |
| 2746 | 79    | 31   | 21   | 41   | 31   | 37   | 9    | 18   | 39   |
| 2747 | 70    | 32   | 21   | 23.5 | 34   | 27   | 8    | 18   | 23   |
| 2748 | 161   | 33   | 25   | 54   | 41   | 80   | 14   | 27.5 | 70   |
| 2749 | 51    | 26   | 22   | 31   | 51.5 | 12   | 37   | 14   | 61.5 |
| 2750 | 78    | 34   | 21   | 27   | 44   | 28   | 8    | 21   | 31   |
| 2751 | 102.5 | 36.5 | 35   | 43.5 | 43.5 | 57   | 17   | 24   | 70   |
| 2752 | 79    | 37   | 24   | 33   | 39.5 | 37   | 13   | 22   | 23   |
| 2753 | 92    | 68   | 25.5 | 125  | 35   | 33   | 15   | 21   | 31   |
| 2754 | 61.5  | 36   | 19   | 50   | 39   | 26   | 8    | 18   | 40   |
| 2755 | 69    | 36   | 23   | 31   | 40.5 | 20.5 | 9    | 21   | 39   |
| 2756 | 97    | 42   | 59   | 63   | 38   | 52   | 19.5 | 27   | 35   |
| 2757 | 147   | 60   | 27   | 51   | 60.5 | 103  | 26   | 38.5 | 48   |
| 2758 | 122.5 | 11   | 18   | 25   | 10   | 57   | 9    | 12   | 19   |
| 2759 | 100   | 37.5 | 25.5 | 37   | 44.5 | 44   | 13   | 24   | 26.5 |
| 2760 | 138.5 | 44.5 | 32   | 53   | 50   | 60   | 17   | 34   | 52.5 |
| 2761 | 121   | 29   | 22.5 | 34   | 103  | 63   | 12   | 26   | 33.5 |
| 2762 | 85    | 21   | 19   | 36.5 | 25   | 45   | 20   | 26   | 29   |
| 2763 | 46    | 25   | 237  | 78   | 15   | 18   | 12   | 7    | 31.5 |
| 2764 | 66    | 28   | 21   | 29.5 | 28   | 29.5 | 7    | 30   | 21   |
| 2765 | 63    | 24.5 | 19   | 23   | 29   | 16.5 | 11   | 16   | 19   |
| 2766 | 114   | 36.5 | 25   | 36.5 | 48   | 41.5 | 15   | 25   | 51   |
| 2767 | 92    | 41   | 28   | 47   | 43   | 39.5 | 14   | 23   | 36   |
| 2768 | 92.5  | 31   | 26   | 31   | 34.5 | 36   | 11   | 22   | 37   |
| 2769 | 109   | 33   | 23   | 32   | 36   | 49   | 10   | 24   | 32   |
| 2770 | 93    | 23   | 18   | 32   | 31   | 41   | 11   | 19   | 27   |
| 2771 | 74    | 55   | 70   | 58   | 51   | 63   | 64   | 67   | 71   |

|      |       |      |      |      |      |      |      |      |      |
|------|-------|------|------|------|------|------|------|------|------|
| 2772 | 113   | 37   | 23   | 40   | 46   | 53   | 11   | 28   | 78   |
| 2773 | 102.5 | 31   | 24   | 37.5 | 36   | 48.5 | 12   | 24   | 25   |
| 2774 | 79.5  | 32   | 25.5 | 29.5 | 36   | 24   | 11   | 19   | 24   |
| 2775 | 79.5  | 32   | 25.5 | 29.5 | 36   | 24   | 11   | 19   | 24   |
| 2776 | 83    | 35.5 | 23   | 33   | 32   | 27   | 10   | 20   | 31   |
| 2777 | 70    | 22   | 16   | 26   | 24   | 22   | 7    | 16   | 21   |
| 2778 | 35    | 26   | 16   | 37   | 26   | 9    | 8    | 12   | 22   |
| 2779 | 117   | 38   | 29   | 44   | 46   | 55.5 | 17   | 31   | 69   |
| 2780 | 151   | 31   | 26   | 41   | 37.5 | 62   | 16.5 | 28   | 41   |
| 2781 | 67    | 28   | 18.5 | 44   | 30   | 40   | 14   | 22   | 35   |
| 2782 | 84.5  | 32   | 19   | 23.5 | 36   | 22   | 8    | 18   | 56.5 |
| 2783 | 192   | 28   | 18   | 41   | 31.5 | 84   | 7.5  | 18   | 20   |
| 2784 | 119   | 42   | 28   | 43   | 53   | 52   | 13   | 29   | 33   |
| 2785 | 77    | 101  | 96   | 108  | 81   | 61   | 78   | 115  | 91   |
| 2786 | 60    | 26   | 17   | 20   | 22.5 | 12   | 6    | 13   | 26   |
| 2787 | 69    | 10   | 11   | 31   | 9.5  | 17   | 10   | 7    | 23   |
| 2788 | 92.5  | 30   | 21   | 27   | 33.5 | 28.5 | 11   | 18   | 34   |
| 2789 | 174   | 43.5 | 23   | 77.5 | 38   | 36   | 13   | 23   | 53   |
| 2790 | 67    | 31.5 | 20   | 27   | 39   | 22   | 10   | 29   | 23   |
| 2791 | 93    | 30.5 | 17   | 40   | 29   | 27   | 7    | 16   | 37   |
| 2792 | 126   | 48   | 34.5 | 51   | 66   | 64.5 | 20   | 40   | 44   |
| 2793 | 84    | 31   | 21   | 43   | 35   | 44.5 | 9    | 18   | 36   |
| 2794 | 49    | 23   | 17   | 24   | 24   | 8    | 5    | 13   | 16   |
| 2795 | 100   | 36   | 25   | 44   | 51   | 42   | 12   | 25   | 48   |
| 2796 | 123   | 38.5 | 26.5 | 42   | 40   | 54.5 | 21   | 24   | 29   |
| 2797 | 103   | 44   | 27   | 39   | 48   | 41   | 12   | 23   | 40   |
| 2798 | 136   | 39   | 24   | 41   | 64   | 72   | 12   | 29.5 | 31   |
| 2799 | 131   | 40   | 28   | 41   | 47   | 58.5 | 16   | 30   | 37.5 |
| 2800 | 88    | 23   | 15   | 21   | 27   | 41   | 8    | 17   | 34   |
| 2801 | 95    | 22   | 17   | 24   | 25   | 45.5 | 6    | 17   | 28   |
| 2802 | 95    | 22   | 17   | 24   | 25   | 45.5 | 6    | 17   | 28   |
| 2803 | 101   | 30   | 19   | 46   | 33   | 42   | 12   | 21   | 46   |
| 2804 | 107.5 | 42   | 28   | 34   | 42   | 49   | 12   | 24   | 38   |
| 2805 | 111.5 | 29   | 22   | 39   | 31   | 60   | 12   | 22   | 26   |
| 2806 | 90    | 37.5 | 22.5 | 36   | 36   | 30   | 11   | 20   | 38   |
| 2807 | 99    | 34   | 21   | 33   | 30   | 38   | 10   | 21   | 46   |
| 2808 | 81.5  | 29.5 | 20.5 | 29   | 32   | 32.5 | 8    | 17   | 32   |
| 2809 | 72    | 67   | 80   | 103  | 70   | 64   | 84   | 71   | 70   |
| 2810 | 74    | 34   | 23.5 | 35   | 46.5 | 33   | 14   | 24.5 | 44   |
| 2811 | 90    | 33   | 27   | 30.5 | 45   | 41.5 | 10   | 25   | 33   |
| 2812 | 112   | 30   | 22   | 37   | 49   | 53   | 12   | 25   | 33   |
| 2813 | 115   | 38   | 27   | 44   | 46   | 46.5 | 14   | 28.5 | 37   |
| 2814 | 70    | 9    | 10.5 | 25   | 9    | 25.5 | 9    | 11   | 25   |
| 2815 | 59    | 67   | 87   | 109  | 81   | 66   | 98   | 81   | 90   |
| 2816 | 77    | 28   | 22   | 26   | 30   | 16   | 10   | 14   | 32   |
| 2817 | 83    | 35   | 24   | 27   | 37   | 21   | 8    | 20   | 49   |
| 2818 | 153   | 40   | 28   | 49   | 46   | 66.5 | 15   | 32.5 | 35   |

|      |       |      |       |      |      |       |      |      |      |
|------|-------|------|-------|------|------|-------|------|------|------|
| 2819 | 79    | 35   | 26    | 39   | 38   | 48.5  | 10   | 22.5 | 30   |
| 2820 | 123.5 | 35   | 23    | 37   | 39   | 62    | 14   | 30   | 62.5 |
| 2821 | 78.5  | 30   | 23    | 27   | 32   | 29    | 10   | 16.5 | 25   |
| 2822 | 81    | 32   | 19    | 24   | 33   | 22    | 11   | 18   | 30.5 |
| 2823 | 103.5 | 32   | 23    | 25.5 | 44   | 28    | 12   | 21   | 25   |
| 2824 | 127   | 50   | 35    | 48   | 61   | 50    | 26   | 40   | 48   |
| 2825 | 136   | 60.5 | 37.5  | 129  | 453  | 45.5  | 83   | 33   | 116  |
| 2826 | 118   | 46   | 39    | 46   | 66   | 51.5  | 18   | 30   | 81.5 |
| 2827 | 134   | 45   | 30    | 41   | 48   | 56    | 14   | 27   | 32   |
| 2828 | 123   | 31   | 21    | 36   | 36   | 59    | 12   | 23   | 45   |
| 2829 | 161.5 | 42   | 30    | 32   | 69.5 | 79    | 17   | 26   | 80   |
| 2830 | 91    | 32   | 26    | 29.5 | 42.5 | 40    | 13   | 26   | 23   |
| 2831 | 56    | 30   | 19.5  | 23   | 26   | 13    | 9    | 14   | 113  |
| 2832 | 56    | 32   | 19    | 21   | 29   | 16.5  | 6    | 15   | 19   |
| 2833 | 120.5 | 35   | 26    | 50   | 42.5 | 61    | 14   | 31   | 26.5 |
| 2834 | 53    | 66   | 79    | 75   | 54   | 39    | 68   | 85   | 74   |
| 2835 | 50    | 21   | 14    | 16.5 | 26   | 11    | 9    | 11.5 | 13   |
| 2836 | 131   | 33   | 24    | 34   | 40.5 | 63.5  | 14   | 25   | 36.5 |
| 2837 | 126.5 | 45   | 30    | 46   | 52   | 45    | 14   | 29   | 55   |
| 2838 | 132   | 29   | 23    | 33   | 37.5 | 76    | 12   | 28   | 54   |
| 2839 | 113   | 15   | 14    | 30   | 14   | 46    | 9    | 15   | 26   |
| 2840 | 69    | 27   | 17    | 19   | 27.5 | 18    | 5    | 15   | 17   |
| 2841 | 70    | 24   | 16    | 30   | 28   | 17.5  | 7    | 13   | 85   |
| 2842 | 124   | 34.5 | 32    | 38.5 | 67.5 | 61    | 16   | 28   | 35   |
| 2843 | 76    | 27   | 21    | 31   | 28   | 24    | 10   | 16   | 38   |
| 2844 | 93    | 32   | 21    | 31   | 33.5 | 36    | 11   | 27   | 27   |
| 2845 | 55    | 26   | 15    | 18   | 101  | 10    | 6    | 13   | 22   |
| 2846 | 67    | 69   | 79    | 90   | 48   | 50    | 60   | 71   | 67   |
| 2847 | 182.5 | 26.5 | 19    | 33.5 | 33   | 59    | 16   | 23   | 44.5 |
| 2848 | 117.5 | 27   | 23    | 35   | 43   | 47    | 12   | 25   | 31.5 |
| 2849 | 135.5 | 43   | 32    | 59.5 | 49   | 54.5  | 14   | 28   | 32   |
| 2850 | 118   | 44   | 30    | 50   | 48.5 | 42    | 15.5 | 26   | 48   |
| 2851 | 70    | 28   | 19    | 25   | 32   | 17    | 7    | 15   | 60   |
| 2852 | 76    | 27   | 19    | 22   | 25   | 45.5  | 9    | 15   | 26   |
| 2853 | 102   | 126  | 123   | 167  | 124  | 91    | 143  | 114  | 109  |
| 2854 | 143   | 35   | 25    | 42   | 41   | 66    | 13   | 28   | 38   |
| 2855 | 140   | 32   | 24    | 39   | 40   | 83.5  | 14   | 34   | 37   |
| 2856 | 78.5  | 26   | 27    | 32   | 43   | 26    | 9    | 18   | 22.5 |
| 2857 | 112   | 30   | 19    | 32   | 32   | 55.5  | 9    | 21   | 51.5 |
| 2858 | 67    | 19   | 12    | 17   | 22   | 19    | 6    | 12   | 21.5 |
| 2859 | 195.5 | 61.5 | 430.5 | 139  | 65.5 | 388.5 | 37   | 21   | 53   |
| 2860 | 150   | 51.5 | 35    | 48.5 | 56   | 76    | 24   | 35   | 40.5 |
| 2861 | 166   | 36   | 25    | 49   | 45   | 73    | 17   | 27.5 | 45   |
| 2862 | 63    | 27   | 15.5  | 54   | 23   | 18    | 7    | 14   | 23   |
| 2863 | 88    | 37   | 20    | 24   | 37   | 25    | 6    | 22   | 34.5 |
| 2864 | 112   | 35   | 22    | 32   | 42   | 47.5  | 14   | 27   | 29   |
| 2865 | 75    | 37   | 24    | 36   | 39.5 | 23    | 10   | 20   | 45   |

|      |       |      |      |      |      |      |      |      |       |
|------|-------|------|------|------|------|------|------|------|-------|
| 2866 | 91    | 124  | 108  | 117  | 109  | 82   | 90   | 97   | 104   |
| 2867 | 120   | 32   | 24   | 22   | 57   | 16   | 14   | 21   | 45    |
| 2868 | 174.5 | 45   | 41   | 53   | 48   | 95   | 15.5 | 33   | 61    |
| 2869 | 67    | 26   | 19   | 23.5 | 25   | 30.5 | 9    | 14   | 87    |
| 2870 | 91.5  | 27   | 18   | 36   | 32   | 32   | 8    | 16.5 | 31    |
| 2871 | 216   | 36   | 25.5 | 33   | 38   | 77   | 47   | 21   | 31    |
| 2872 | 81    | 105  | 88   | 109  | 90   | 76   | 97   | 80   | 80    |
| 2873 | 108   | 37.5 | 22   | 32.5 | 55.5 | 44   | 10   | 27   | 42.5  |
| 2874 | 49    | 27   | 19   | 24   | 25.5 | 22.5 | 6    | 13.5 | 31    |
| 2875 | 114.5 | 14.5 | 15.5 | 39   | 17   | 56   | 11   | 18.5 | 19    |
| 2876 | 40.5  | 22   | 14.5 | 19   | 27   | 11   | 13   | 13   | 11    |
| 2877 | 111   | 33   | 24.5 | 38   | 41   | 52.5 | 14.5 | 26   | 51    |
| 2878 | 99    | 34   | 25   | 43   | 48   | 34   | 19   | 20.5 | 126.5 |
| 2879 | 106   | 33   | 21   | 35   | 35   | 45   | 10   | 21   | 32    |
| 2880 | 160.5 | 15   | 15   | 42.5 | 19   | 72   | 12   | 18   | 24    |
| 2881 | 101   | 42   | 28   | 38   | 49   | 52.5 | 14   | 31   | 55.5  |
| 2882 | 110.5 | 40   | 27.5 | 38.5 | 57   | 37   | 11   | 24   | 45    |
| 2883 | 88    | 132  | 108  | 114  | 95   | 73   | 85   | 123  | 100   |
| 2884 | 118   | 36   | 23   | 40.5 | 41   | 48   | 9    | 22   | 71    |
| 2885 | 122   | 32   | 26   | 41   | 48   | 60   | 14   | 24   | 24    |
| 2886 | 93    | 103  | 119  | 145  | 115  | 83   | 121  | 101  | 108   |
| 2887 | 82    | 29   | 22.5 | 32   | 31   | 33   | 9    | 20   | 28    |
| 2888 | 95    | 42   | 27   | 24   | 40   | 34   | 7    | 20   | 22.5  |
| 2889 | 137   | 46   | 34   | 81   | 39   | 65   | 24   | 23   | 52    |
| 2890 | 59    | 26   | 23   | 33   | 32   | 29   | 10   | 20   | 29.5  |
| 2891 | 78    | 33   | 28   | 40   | 41   | 22.5 | 11.5 | 20   | 26    |
| 2892 | 90.5  | 28   | 18   | 23.5 | 26   | 50   | 9    | 18   | 27    |
| 2893 | 117   | 40   | 23   | 73   | 49   | 62   | 23   | 24   | 41    |
| 2894 | 98    | 30.5 | 23   | 37   | 45   | 34   | 12   | 19   | 23    |
| 2895 | 117   | 35   | 24   | 38   | 36   | 56.5 | 12   | 24   | 74    |
| 2896 | 99    | 31   | 23   | 37.5 | 34   | 44   | 11.5 | 24   | 25    |
| 2897 | 80    | 34.5 | 27   | 33   | 35   | 13   | 10   | 17   | 22.5  |
| 2898 | 150.5 | 33   | 27   | 35.5 | 37.5 | 66   | 14   | 27   | 32    |
| 2899 | 119   | 34   | 18   | 24   | 25   | 41   | 7    | 16   | 44    |
| 2900 | 119   | 34   | 18   | 24   | 25   | 41   | 7    | 16   | 44    |
| 2901 | 104.5 | 24.5 | 19   | 15   | 62   | 13   | 7    | 14   | 36.5  |
| 2902 | 171   | 43   | 39   | 59   | 53   | 106  | 21   | 45   | 43    |
| 2903 | 107   | 35   | 25   | 45   | 35   | 52   | 13   | 25   | 28.5  |
| 2904 | 113   | 127  | 123  | 161  | 98   | 85   | 140  | 110  | 106   |
| 2905 | 90    | 85   | 94   | 103  | 75   | 83   | 85   | 114  | 88    |
| 2906 | 36    | 27   | 28   | 21   | 43   | 20   | 9    | 16   | 15    |
| 2907 | 107   | 36   | 27   | 44   | 41   | 49   | 13   | 29.5 | 32    |
| 2908 | 138   | 46   | 35   | 48   | 54   | 58.5 | 51   | 35   | 36    |
| 2909 | 160.5 | 46   | 33   | 53   | 53   | 76.5 | 19   | 38   | 44    |
| 2910 | 109   | 36   | 28   | 50   | 48   | 49   | 17   | 28   | 48    |
| 2911 | 147   | 43.5 | 35.5 | 52   | 51   | 76.5 | 17   | 34   | 41    |
| 2912 | 144   | 34   | 29   | 46   | 43.5 | 65   | 22   | 32   | 37    |



|      |       |      |      |      |      |      |      |      |      |
|------|-------|------|------|------|------|------|------|------|------|
| 2913 | 87    | 25   | 20   | 21   | 28   | 20   | 7    | 14   | 25   |
| 2914 | 103.5 | 30   | 22   | 45   | 31   | 53.5 | 12   | 23   | 32   |
| 2915 | 143   | 41   | 34   | 59   | 53   | 70   | 32   | 35   | 65   |
| 2916 | 151   | 35.5 | 23   | 37   | 38   | 71.5 | 10   | 24   | 36   |
| 2917 | 70.5  | 29   | 13   | 23   | 28   | 12   | 7.5  | 15.5 | 20   |
| 2918 | 160   | 44   | 32.5 | 53.5 | 52.5 | 73   | 25   | 34   | 73   |
| 2919 | 208   | 39   | 25.5 | 38   | 47   | 101  | 12   | 26   | 32   |
| 2920 | 177   | 28   | 20   | 33   | 39.5 | 63   | 11   | 19   | 30   |
| 2921 | 138   | 31   | 26   | 42.5 | 43   | 75.5 | 15   | 30   | 30   |
| 2922 | 97    | 30   | 21   | 30   | 31.5 | 36   | 9    | 17   | 37   |
| 2923 | 68    | 22   | 21   | 25   | 24   | 22.5 | 12   | 13   | 43   |
| 2924 | 68    | 22   | 21   | 25   | 24   | 22.5 | 12   | 13   | 43   |
| 2925 | 75    | 23   | 18   | 20   | 90   | 19   | 8    | 13   | 24   |
| 2926 | 75    | 23   | 18   | 20   | 90   | 19   | 8    | 13   | 24   |
| 2927 | 99    | 30   | 23   | 28   | 44.5 | 22.5 | 10   | 20   | 46   |
| 2928 | 143   | 43   | 27.5 | 44   | 42   | 74   | 14.5 | 28   | 35   |
| 2929 | 57    | 15   | 12   | 28   | 11   | 17   | 12   | 9    | 16   |
| 2930 | 95    | 43   | 27   | 38   | 53   | 34   | 11   | 25   | 43   |
| 2931 | 157   | 42   | 26   | 54   | 45   | 83   | 16   | 32   | 36   |
| 2932 | 157   | 42   | 26   | 54   | 45   | 83   | 16   | 32   | 36   |
| 2933 | 108   | 38   | 27   | 50   | 39   | 53   | 16   | 25   | 28   |
| 2934 | 90    | 101  | 129  | 113  | 91   | 85   | 117  | 100  | 115  |
| 2935 | 130   | 41   | 27   | 43   | 46   | 56   | 16   | 29   | 55   |
| 2936 | 446.5 | 31   | 19   | 26   | 35   | 149  | 8    | 22   | 56   |
| 2937 | 138   | 47   | 36   | 50   | 63   | 66   | 15.5 | 33   | 51   |
| 2938 | 98    | 113  | 113  | 146  | 111  | 79   | 107  | 98   | 108  |
| 2939 | 123   | 19   | 20   | 48   | 26.5 | 78   | 16   | 34   | 49   |
| 2940 | 111   | 28   | 19   | 29   | 30   | 71.5 | 9    | 24.5 | 31   |
| 2941 | 85    | 30   | 20   | 32   | 34   | 28   | 10   | 16   | 34   |
| 2942 | 141   | 31   | 29   | 50   | 37   | 59   | 16.5 | 25   | 37   |
| 2943 | 40    | 24   | 17   | 19   | 23   | 14.5 | 10   | 13   | 11   |
| 2944 | 76    | 101  | 99   | 145  | 94   | 101  | 84   | 115  | 75   |
| 2945 | 71    | 102  | 105  | 117  | 107  | 77   | 85   | 105  | 100  |
| 2946 | 89.5  | 31   | 19   | 21   | 29   | 31   | 12   | 16   | 38   |
| 2947 | 172   | 39.5 | 26   | 49   | 42   | 72.5 | 17   | 34   | 36   |
| 2948 | 137   | 41   | 28   | 41   | 46   | 52   | 15   | 25   | 56   |
| 2949 | 76    | 10   | 10   | 33   | 10   | 29.5 | 6    | 9    | 14   |
| 2950 | 77    | 23   | 17.5 | 22   | 30   | 11   | 6    | 14   | 30   |
| 2951 | 59    | 28   | 20   | 24   | 24   | 16.5 | 7    | 15   | 24.5 |
| 2952 | 59    | 28   | 20   | 24   | 24   | 16.5 | 7    | 15   | 24.5 |
| 2953 | 151   | 35   | 29   | 37   | 45   | 59   | 13   | 29   | 38   |
| 2954 | 108.5 | 32   | 25   | 32   | 38   | 46   | 12   | 21   | 38.5 |
| 2955 | 162   | 37   | 29.5 | 51   | 46   | 96   | 14   | 31   | 37.5 |
| 2956 | 177   | 35   | 34   | 68   | 60   | 85   | 21   | 44   | 52   |
| 2957 | 78    | 36   | 19   | 28   | 33   | 18   | 6    | 17   | 53.5 |
| 2958 | 95    | 141  | 117  | 133  | 112  | 83   | 122  | 120  | 118  |
| 2959 | 148.5 | 54   | 44   | 70.5 | 63   | 78   | 27   | 54   | 60   |

|      |       |      |      |      |       |      |      |      |      |
|------|-------|------|------|------|-------|------|------|------|------|
| 2960 | 90    | 34   | 27   | 31.5 | 36    | 31   | 11   | 25   | 38   |
| 2961 | 90    | 34   | 27   | 31.5 | 36    | 31   | 11   | 25   | 38   |
| 2962 | 114.5 | 43   | 31   | 44   | 43.5  | 54   | 17   | 29   | 38   |
| 2963 | 125.5 | 44   | 30.5 | 52   | 63.5  | 52   | 20   | 32   | 46   |
| 2964 | 174.5 | 35   | 25   | 43   | 133.5 | 89   | 13   | 27   | 41   |
| 2965 | 65    | 86   | 79   | 113  | 77    | 69   | 81   | 88   | 94   |
| 2966 | 144   | 50   | 33   | 56.5 | 56    | 72   | 23   | 35   | 40   |
| 2967 | 164   | 46   | 30   | 48   | 60    | 76   | 18   | 33   | 48   |
| 2968 | 155   | 40   | 35   | 48   | 47    | 97.5 | 15   | 33   | 30   |
| 2969 | 108   | 42   | 28   | 33   | 42    | 26   | 13   | 22   | 50.5 |
| 2970 | 58    | 25   | 16   | 20   | 25    | 19   | 6    | 15   | 15   |
| 2971 | 155   | 40   | 23   | 109  | 33.5  | 53.5 | 14   | 24   | 23   |
| 2972 | 75    | 33   | 25   | 49   | 36.5  | 29   | 15   | 51.5 | 76   |
| 2973 | 80    | 95   | 90   | 88   | 81    | 78   | 86   | 96   | 75   |
| 2974 | 169   | 47   | 33.5 | 50   | 54    | 81   | 17   | 35   | 49.5 |
| 2975 | 157   | 36   | 9    | 47.5 | 26    | 97.5 | 12   | 15   | 42   |
| 2976 | 73    | 12   | 8    | 28   | 9     | 16   | 7    | 7    | 41   |
| 2977 | 95    | 27   | 19   | 31   | 28    | 30   | 8    | 20   | 71   |
| 2978 | 108   | 28   | 18   | 36   | 26.5  | 24   | 25   | 15   | 48   |
| 2979 | 182   | 36   | 21.5 | 39   | 40    | 54   | 10   | 22   | 38   |
| 2980 | 164   | 39   | 30   | 40   | 53    | 86   | 20   | 33   | 49   |
| 2981 | 66.5  | 34   | 17   | 29   | 27    | 18   | 7    | 15   | 39   |
| 2982 | 66.5  | 34   | 17   | 29   | 27    | 18   | 7    | 15   | 39   |
| 2983 | 94    | 35   | 21   | 26   | 30    | 26.5 | 9    | 17   | 43   |
| 2984 | 87    | 94   | 86   | 112  | 88    | 83   | 93   | 80   | 105  |
| 2985 | 104.5 | 29   | 27   | 38   | 35    | 40.5 | 11   | 26   | 28   |
| 2986 | 130   | 37   | 28   | 42   | 46    | 53   | 11   | 25   | 23   |
| 2987 | 163   | 19   | 15   | 38.5 | 29    | 75   | 15   | 19   | 44.5 |
| 2988 | 103.5 | 11   | 12   | 26.5 | 13    | 41   | 9    | 13   | 22.5 |
| 2989 | 52.5  | 8    | 5    | 21   | 5     | 7    | 5    | 5    | 21   |
| 2990 | 85.5  | 25   | 15   | 24.5 | 26    | 10   | 4    | 11   | 33   |
| 2991 | 106   | 28.5 | 23.5 | 26   | 38.5  | 30   | 17   | 18   | 41   |
| 2992 | 102   | 36   | 29   | 48   | 47.5  | 61   | 20.5 | 29.5 | 34   |
| 2993 | 80    | 103  | 96   | 118  | 96    | 87   | 108  | 118  | 94   |
| 2994 | 144   | 38   | 33.5 | 65   | 56    | 74   | 22.5 | 85   | 121  |
| 2995 | 147   | 49   | 37   | 62   | 57    | 89   | 30   | 39   | 51   |
| 2996 | 107   | 31   | 27   | 31   | 37    | 45   | 11   | 23   | 33   |
| 2997 | 116   | 32.5 | 43   | 61   | 35.5  | 48   | 27.5 | 24   | 29   |
| 2998 | 160.5 | 42   | 32   | 33.5 | 54    | 54   | 12   | 30   | 50   |
| 2999 | 163   | 44   | 30   | 71   | 41.5  | 90.5 | 20   | 35   | 98   |
| 3000 | 125.5 | 33   | 19   | 53   | 34    | 55   | 16   | 19   | 44   |
| 3001 | 95    | 128  | 116  | 141  | 114   | 86   | 120  | 121  | 88   |
| 3002 | 82    | 94   | 85   | 95   | 68    | 82   | 101  | 85   | 91   |
| 3003 | 88    | 31   | 31   | 30   | 30    | 32   | 11   | 18   | 39   |
| 3004 | 100   | 123  | 111  | 134  | 84    | 89   | 112  | 117  | 91   |
| 3005 | 81    | 36.5 | 22   | 29   | 41    | 29.5 | 9    | 20   | 52.5 |
| 3006 | 136   | 39   | 28   | 46   | 46    | 58   | 16   | 28   | 42   |

|      |       |      |      |      |      |      |      |      |      |
|------|-------|------|------|------|------|------|------|------|------|
| 3007 | 141   | 38.5 | 34   | 41   | 46   | 70   | 13   | 36   | 39   |
| 3008 | 101   | 140  | 112  | 176  | 125  | 101  | 111  | 123  | 104  |
| 3009 | 97    | 42   | 28   | 41   | 39   | 23.5 | 12   | 30   | 76   |
| 3010 | 83    | 28.5 | 18   | 26   | 28   | 23   | 7    | 15   | 58   |
| 3011 | 59    | 14.5 | 23   | 28   | 16   | 19   | 9    | 8    | 62.5 |
| 3012 | 89    | 117  | 133  | 146  | 117  | 101  | 119  | 117  | 129  |
| 3013 | 145   | 28   | 21.5 | 31   | 34   | 59   | 14   | 26   | 32   |
| 3014 | 66    | 35   | 22   | 41   | 35   | 23   | 18   | 17.5 | 36   |
| 3015 | 183   | 51   | 40   | 56   | 63   | 82   | 19   | 43   | 53   |
| 3016 | 97    | 124  | 127  | 117  | 97   | 81   | 93   | 140  | 118  |
| 3017 | 168   | 55   | 39   | 64   | 62   | 77   | 27   | 42   | 68   |
| 3018 | 77    | 14   | 8    | 88   | 11   | 27   | 16   | 8    | 17   |
| 3019 | 142.5 | 35   | 33   | 56   | 82   | 88   | 20   | 37   | 41.5 |
| 3020 | 108   | 131  | 140  | 175  | 126  | 88   | 119  | 111  | 120  |
| 3021 | 145   | 32   | 26   | 43   | 37   | 68   | 15   | 29   | 36   |
| 3022 | 109   | 95   | 118  | 124  | 88   | 89   | 99   | 102  | 124  |
| 3023 | 164   | 56.5 | 39   | 74.5 | 65   | 71.5 | 22   | 43   | 62   |
| 3024 | 93    | 92   | 107  | 102  | 89   | 75   | 105  | 125  | 99   |
| 3025 | 107   | 153  | 143  | 176  | 124  | 109  | 120  | 119  | 117  |
| 3026 | 73.5  | 23   | 21   | 32   | 28   | 21   | 8    | 15   | 24   |
| 3027 | 105   | 121  | 117  | 138  | 113  | 102  | 110  | 122  | 93   |
| 3028 | 152   | 35   | 22   | 41   | 43   | 49   | 13   | 18   | 55   |
| 3029 | 85    | 31   | 18   | 30.5 | 29   | 22   | 7    | 16   | 41.5 |
| 3030 | 123   | 139  | 123  | 167  | 102  | 100  | 131  | 138  | 118  |
| 3031 | 97    | 122  | 130  | 112  | 111  | 93   | 107  | 143  | 112  |
| 3032 | 124   | 53   | 31   | 64.5 | 32   | 51   | 14.5 | 22   | 122  |
| 3033 | 88    | 35   | 23   | 26   | 40.5 | 35   | 10   | 17   | 47   |
| 3034 | 107   | 25   | 22   | 49   | 32   | 56   | 13   | 21   | 29   |
| 3035 | 84.5  | 27   | 17   | 34   | 24   | 33.5 | 9    | 15   | 27   |
| 3036 | 88    | 37   | 26   | 22   | 37   | 26   | 10   | 21   | 26.5 |
| 3037 | 78.5  | 24   | 18   | 14   | 31   | 9    | 5    | 15   | 32   |
| 3038 | 78.5  | 24   | 18   | 14   | 31   | 9    | 5    | 15   | 32   |
| 3039 | 92    | 24   | 21   | 13   | 30   | 12.5 | 6    | 15   | 30   |
| 3040 | 80    | 23   | 26   | 35   | 40.5 | 44   | 9    | 17   | 31   |
| 3041 | 96    | 103  | 114  | 127  | 86   | 91   | 106  | 86   | 93   |
| 3042 | 126   | 38   | 26   | 41   | 46   | 51   | 13   | 27   | 64   |
| 3043 | 145   | 35   | 27   | 48   | 49   | 63   | 16   | 28   | 48   |
| 3044 | 149.5 | 36   | 29   | 39   | 44   | 64   | 20   | 32.5 | 47   |
| 3045 | 191.5 | 51   | 36.5 | 58   | 50   | 85   | 16.5 | 36   | 62.5 |
| 3046 | 119   | 161  | 137  | 181  | 128  | 112  | 146  | 143  | 125  |
| 3047 | 89    | 25   | 18   | 24   | 32   | 25   | 10   | 15   | 28   |
| 3048 | 105   | 39   | 22   | 47   | 30   | 30.5 | 11   | 15   | 62   |
| 3049 | 103   | 29   | 23   | 30   | 29   | 33   | 11   | 17   | 141  |
| 3050 | 73    | 24   | 46   | 14   | 30   | 16   | 12   | 14   | 34   |
| 3051 | 177   | 53   | 31   | 55   | 57.5 | 86.5 | 16   | 36   | 53   |
| 3052 | 97.5  | 23   | 15.5 | 15   | 24   | 15   | 6    | 14   | 34   |
| 3053 | 73.5  | 29   | 27   | 31   | 35.5 | 35   | 15   | 25   | 31   |

|      |     |     |     |      |     |      |     |     |      |
|------|-----|-----|-----|------|-----|------|-----|-----|------|
| 3054 | 82  | 103 | 89  | 91   | 82  | 60   | 90  | 87  | 87   |
| 3055 | 96  | 108 | 101 | 130  | 95  | 97   | 103 | 119 | 103  |
| 3056 | 103 | 107 | 120 | 140  | 108 | 91   | 108 | 113 | 104  |
| 3057 | 135 | 35  | 23  | 35   | 47  | 57   | 13  | 27  | 25.5 |
| 3058 | 202 | 48  | 32  | 48   | 55  | 80   | 18  | 30  | 62   |
| 3059 | 109 | 141 | 127 | 124  | 111 | 86   | 113 | 121 | 130  |
| 3060 | 53  | 11  | 8   | 23.5 | 12  | 11   | 8   | 6   | 37   |
| 3061 | 241 | 32  | 25  | 24   | 34  | 91.5 | 10  | 19  | 28   |
| 3062 | 120 | 107 | 145 | 134  | 107 | 110  | 101 | 113 | 112  |
| 3063 | 124 | 100 | 127 | 117  | 113 | 118  | 131 | 121 | 118  |
| 3064 | 138 | 135 | 137 | 126  | 118 | 115  | 131 | 141 | 131  |
| 3065 | 105 | 122 | 118 | 125  | 109 | 104  | 100 | 123 | 132  |
| 3066 | 100 | 129 | 121 | 137  | 120 | 110  | 141 | 138 | 139  |
| 3067 | 114 | 122 | 140 | 125  | 107 | 105  | 109 | 100 | 153  |
| 3068 | 122 | 110 | 125 | 117  | 100 | 117  | 135 | 115 | 115  |
| 3069 | 119 | 123 | 118 | 120  | 137 | 104  | 110 | 116 | 136  |
| 3070 | 110 | 118 | 127 | 126  | 123 | 107  | 106 | 136 | 113  |
| 3071 | 111 | 133 | 136 | 155  | 126 | 112  | 106 | 131 | 131  |
| 3072 | 132 | 140 | 161 | 141  | 122 | 113  | 142 | 148 | 148  |
| 3073 | 115 | 115 | 119 | 121  | 105 | 119  | 153 | 129 | 138  |
| 3074 | 114 | 122 | 126 | 127  | 106 | 105  | 130 | 127 | 131  |
| 3075 | 117 | 102 | 128 | 106  | 128 | 103  | 102 | 114 | 122  |
| 3076 | 121 | 123 | 116 | 110  | 123 | 100  | 100 | 124 | 128  |
| 3077 | 118 | 138 | 132 | 106  | 121 | 119  | 113 | 139 | 101  |
| 3078 | 104 | 132 | 156 | 150  | 113 | 112  | 149 | 143 | 132  |
| 3079 | 125 | 114 | 129 | 153  | 107 | 100  | 127 | 135 | 126  |
| 3080 | 115 | 124 | 116 | 104  | 119 | 106  | 114 | 139 | 126  |
| 3081 | 109 | 130 | 130 | 136  | 102 | 121  | 100 | 126 | 125  |
| 3082 | 112 | 108 | 126 | 118  | 105 | 106  | 122 | 107 | 135  |
| 3083 | 112 | 127 | 136 | 137  | 122 | 100  | 131 | 134 | 117  |
| 3084 | 141 | 132 | 146 | 129  | 119 | 101  | 141 | 116 | 136  |
| 3085 | 116 | 129 | 134 | 144  | 118 | 107  | 128 | 114 | 126  |
| 3086 | 100 | 105 | 127 | 106  | 128 | 107  | 132 | 140 | 160  |
| 3087 | 116 | 117 | 124 | 120  | 114 | 107  | 125 | 124 | 133  |
| 3088 | 122 | 109 | 126 | 125  | 108 | 103  | 109 | 115 | 159  |
| 3089 | 103 | 115 | 119 | 137  | 127 | 100  | 130 | 110 | 119  |
| 3090 | 107 | 112 | 123 | 117  | 100 | 100  | 102 | 100 | 104  |
| 3091 | 125 | 131 | 127 | 129  | 128 | 146  | 115 | 140 | 126  |
| 3092 | 113 | 138 | 115 | 120  | 108 | 108  | 121 | 134 | 133  |
| 3093 | 112 | 128 | 116 | 122  | 116 | 100  | 139 | 128 | 139  |
| 3094 | 100 | 121 | 131 | 133  | 115 | 106  | 133 | 119 | 118  |
| 3095 | 109 | 116 | 121 | 132  | 111 | 104  | 126 | 105 | 119  |
| 3096 | 106 | 116 | 115 | 126  | 113 | 107  | 118 | 127 | 122  |
| 3097 | 107 | 115 | 125 | 143  | 115 | 105  | 139 | 131 | 130  |
| 3098 | 122 | 128 | 112 | 114  | 110 | 105  | 111 | 124 | 100  |
| 3099 | 118 | 116 | 115 | 118  | 100 | 105  | 105 | 111 | 112  |
| 3100 | 130 | 133 | 130 | 122  | 144 | 124  | 124 | 128 | 126  |

|      |     |     |     |      |     |     |      |     |      |
|------|-----|-----|-----|------|-----|-----|------|-----|------|
| 3101 | 47  | 12  | 7   | 29.5 | 12  | 10  | 6    | 28  | 23.5 |
| 3102 | 126 | 121 | 119 | 118  | 101 | 115 | 141  | 136 | 135  |
| 3103 | 113 | 133 | 138 | 107  | 133 | 107 | 104  | 127 | 113  |
| 3104 | 101 | 115 | 141 | 111  | 101 | 101 | 141  | 124 | 119  |
| 3105 | 100 | 113 | 118 | 111  | 108 | 105 | 139  | 121 | 118  |
| 3106 | 125 | 136 | 150 | 173  | 126 | 107 | 125  | 129 | 116  |
| 3107 | 127 | 126 | 112 | 127  | 102 | 102 | 107  | 121 | 117  |
| 3108 | 112 | 114 | 129 | 117  | 102 | 100 | 110  | 125 | 112  |
| 3109 | 122 | 119 | 143 | 121  | 126 | 111 | 122  | 132 | 120  |
| 3110 | 122 | 119 | 143 | 121  | 126 | 111 | 122  | 132 | 120  |
| 3111 | 106 | 136 | 128 | 125  | 117 | 109 | 115  | 142 | 110  |
| 3112 | 104 | 106 | 106 | 113  | 133 | 100 | 121  | 136 | 130  |
| 3113 | 132 | 138 | 140 | 128  | 123 | 100 | 145  | 141 | 130  |
| 3114 | 101 | 104 | 127 | 128  | 115 | 117 | 100  | 105 | 114  |
| 3115 | 105 | 110 | 105 | 134  | 121 | 105 | 126  | 125 | 121  |
| 3116 | 110 | 142 | 129 | 120  | 120 | 106 | 136  | 120 | 137  |
| 3117 | 118 | 129 | 107 | 101  | 114 | 102 | 118  | 131 | 137  |
| 3118 | 100 | 121 | 123 | 134  | 128 | 100 | 129  | 142 | 154  |
| 3119 | 100 | 145 | 131 | 148  | 103 | 111 | 118  | 136 | 131  |
| 3120 | 107 | 145 | 135 | 168  | 130 | 108 | 152  | 154 | 148  |
| 3121 | 109 | 135 | 136 | 150  | 120 | 104 | 142  | 150 | 130  |
| 3122 | 100 | 134 | 131 | 149  | 111 | 111 | 137  | 135 | 121  |
| 3123 | 135 | 126 | 119 | 151  | 111 | 100 | 117  | 126 | 128  |
| 3124 | 113 | 127 | 122 | 182  | 127 | 116 | 108  | 122 | 126  |
| 3125 | 127 | 140 | 154 | 170  | 135 | 98  | 145  | 151 | 139  |
| 3126 | 127 | 140 | 154 | 170  | 135 | 98  | 145  | 151 | 139  |
| 3127 | 129 | 131 | 126 | 153  | 102 | 100 | 107  | 131 | 124  |
| 3128 | 130 | 153 | 132 | 158  | 142 | 113 | 117  | 166 | 138  |
| 3129 | 539 | 33  | 21  | 40   | 60  | 266 | 61   | 29  | 51   |
| 3130 | 126 | 128 | 122 | 154  | 131 | 95  | 122  | 135 | 127  |
| 3131 | 123 | 146 | 124 | 160  | 126 | 100 | 144  | 131 | 151  |
| 3132 | 119 | 124 | 137 | 160  | 110 | 122 | 142  | 137 | 133  |
| 3133 | 190 | 52  | 39  | 55   | 980 | 89  | 17.5 | 35  | 108  |
| 3134 | 144 | 159 | 154 | 165  | 148 | 95  | 155  | 139 | 122  |
| 3135 | 135 | 150 | 138 | 161  | 158 | 100 | 133  | 135 | 131  |
| 3136 | 135 | 150 | 138 | 161  | 158 | 100 | 133  | 135 | 131  |
| 3137 | 128 | 148 | 139 | 178  | 152 | 100 | 112  | 138 | 130  |
| 3138 | 144 | 127 | 139 | 164  | 148 | 100 | 141  | 134 | 153  |
| 3139 | 94  | 129 | 145 | 162  | 134 | 106 | 129  | 126 | 120  |
| 3140 | 119 | 146 | 143 | 181  | 131 | 104 | 147  | 112 | 138  |
| 3141 | 282 | 68  | 45  | 72.5 | 74  | 115 | 30.5 | 55  | 66   |
| 3142 | 102 | 166 | 148 | 181  | 154 | 100 | 150  | 133 | 141  |
| 3143 | 102 | 166 | 148 | 181  | 154 | 100 | 150  | 133 | 141  |
| 3144 | 109 | 128 | 116 | 165  | 108 | 100 | 144  | 144 | 124  |
| 3145 | 127 | 144 | 154 | 172  | 139 | 123 | 147  | 148 | 124  |
| 3146 | 115 | 121 | 125 | 174  | 135 | 110 | 143  | 140 | 156  |
| 3147 | 121 | 159 | 124 | 182  | 111 | 102 | 133  | 132 | 140  |

|      |       |      |      |      |      |       |      |      |      |
|------|-------|------|------|------|------|-------|------|------|------|
| 3148 | 116   | 100  | 114  | 169  | 120  | 100   | 126  | 103  | 104  |
| 3149 | 122   | 177  | 165  | 188  | 132  | 97    | 127  | 150  | 131  |
| 3150 | 134   | 121  | 127  | 172  | 123  | 100   | 129  | 123  | 144  |
| 3151 | 434.5 | 62.5 | 49   | 94   | 81   | 210   | 34.5 | 72   | 76.5 |
| 3152 | 100   | 129  | 139  | 174  | 143  | 99    | 117  | 153  | 130  |
| 3153 | 138   | 140  | 152  | 187  | 150  | 110   | 152  | 147  | 147  |
| 3154 | 139   | 144  | 151  | 179  | 106  | 129   | 134  | 164  | 148  |
| 3155 | 110   | 138  | 130  | 187  | 134  | 125   | 152  | 135  | 123  |
| 3156 | 110   | 138  | 130  | 187  | 134  | 125   | 152  | 135  | 123  |
| 3157 | 396   | 68   | 53   | 78   | 81.5 | 151   | 34   | 62   | 68.5 |
| 3158 | 123   | 141  | 165  | 200  | 144  | 100   | 141  | 152  | 129  |
| 3159 | 792.5 | 36   | 109  | 31   | 34   | 273   | 9    | 30   | 32.5 |
| 3160 | 777   | 45.5 | 32   | 87   | 69   | 411   | 38   | 59   | 83.5 |
| 3161 | 469.5 | 86   | 59   | 203  | 81.5 | 227   | 58   | 37   | 123  |
| 3162 | 297   | 59   | 48   | 68   | 116  | 127.5 | 29   | 55   | 70.5 |
| 3163 | 559   | 36   | 21   | 62   | 52   | 355.5 | 27   | 45.5 | 65   |
| 3164 | 334   | 78.5 | 68   | 93   | 92   | 160   | 50   | 71   | 85   |
| 3165 | 362   | 40   | 27   | 61   | 46   | 147.5 | 17   | 36   | 69   |
| 3166 | 360.5 | 58   | 41.5 | 87   | 68   | 230   | 25.5 | 74   | 68   |
| 3167 | 535   | 68   | 57   | 104  | 92   | 263   | 38   | 84   | 90   |
| 3168 | 32    | 23   | 16   | 88   | 38   | 34    | 14   | 21   | 17   |
| 3169 | 415.5 | 451  | 87   | 3392 | 65   | 895   | 833  | 291  | 369  |
| 3170 | 36    | 22   | 15   | 45   | 27   | 34    | 10   | 13   | 16   |
| 3171 | 76    | 31   | 22   | 71   | 32   | 54.5  | 15   | 19   | 36   |
| 3172 | 28    | 16   | 8    | 36   | 13   | 21    | 6    | 17   | 15   |
| 3173 | 33    | 25   | 15   | 52   | 27.5 | 31    | 11   | 18   | 23   |
| 3174 | 43    | 30   | 16   | 50.5 | 19   | 36    | 14   | 30   | 34.5 |
| 3175 | 446   | 480  | 95   | 3525 | 93   | 906   | 788  | 294  | 401  |
| 3176 | 51    | 34   | 41   | 91   | 29   | 41    | 17   | 16   | 24   |
| 3177 | 55.5  | 45   | 16   | 47   | 61   | 49.5  | 13   | 35   | 57.5 |
| 3178 | 103   | 83   | 57   | 70   | 35   | 92    | 32   | 77   | 69   |
| 3179 | 44.5  | 31.5 | 16   | 44   | 22   | 42    | 9    | 23   | 28   |
| 3180 | 42    | 30   | 12.5 | 40   | 16   | 42    | 11   | 46   | 24   |
| 3181 | 40    | 26   | 10   | 41   | 17.5 | 34    | 10   | 33   | 11   |
| 3182 | 32    | 22   | 10   | 45   | 18   | 27    | 10   | 26   | 17   |
| 3183 | 32    | 19   | 9    | 39   | 17   | 25    | 8    | 21   | 5    |
| 3184 | 39    | 18   | 10   | 37   | 13   | 26    | 8    | 19   | 95   |
| 3185 | 23    | 12   | 15.5 | 44   | 27   | 24    | 12   | 24.5 | 96   |
| 3186 | 41    | 31   | 13   | 33   | 15   | 41.5  | 9    | 24   | 21   |
| 3187 | 31    | 20   | 10   | 40   | 13   | 25    | 8    | 20   | 11   |
| 3188 | 42    | 28   | 11   | 36   | 16   | 34    | 11   | 26   | 23   |
| 3189 | 54    | 41.5 | 17   | 53   | 25   | 45.5  | 15   | 50   | 51   |
| 3190 | 37.5  | 23   | 12   | 33   | 22   | 32    | 8.5  | 18   | 82   |
| 3191 | 32    | 21   | 16.5 | 40   | 18.5 | 20    | 8    | 37   | 20   |
| 3192 | 66    | 50   | 27   | 55   | 28   | 54    | 21   | 47   | 80   |
| 3193 | 33    | 21   | 14   | 26   | 15   | 26    | 9    | 24.5 | 28.5 |
| 3194 | 51    | 34   | 14   | 37   | 17   | 40    | 11   | 27   | 28   |

|      |       |      |      |      |      |      |      |      |      |
|------|-------|------|------|------|------|------|------|------|------|
| 3195 | 110.5 | 89   | 46   | 80   | 43   | 90   | 37   | 83   | 83   |
| 3196 | 53    | 37.5 | 21   | 47   | 24   | 42   | 14   | 32   | 31   |
| 3197 | 37    | 27   | 10   | 40   | 14   | 34   | 8.5  | 18   | 20   |
| 3198 | 47    | 28   | 13   | 45   | 18   | 31   | 11   | 30   | 31   |
| 3199 | 69    | 52   | 24.5 | 54   | 23.5 | 59   | 20   | 50   | 58   |
| 3200 | 42    | 28   | 12   | 49   | 22   | 34   | 12   | 26   | 47   |
| 3201 | 42    | 28   | 16   | 46   | 18   | 31   | 12   | 22   | 24   |
| 3202 | 117   | 24   | 15   | 53   | 15   | 28.5 | 8    | 25   | 14.5 |
| 3203 | 37    | 19   | 12   | 32   | 15.5 | 20.5 | 6    | 21.5 | 13   |
| 3204 | 37    | 23   | 12.5 | 39   | 24   | 27   | 8    | 19.5 | 16   |
| 3205 | 51    | 37   | 17   | 45   | 25   | 41.5 | 15   | 33   | 47   |
| 3206 | 40    | 23   | 13   | 44.5 | 17   | 30   | 12   | 26   | 26   |
| 3207 | 68    | 45   | 23   | 55   | 27   | 47   | 16   | 41   | 44   |
| 3208 | 34.5  | 21   | 19   | 47.5 | 16   | 24   | 9    | 22   | 24   |
| 3209 | 41    | 24   | 11   | 34   | 20   | 28   | 14   | 22   | 38   |
| 3210 | 30    | 15   | 8    | 35.5 | 18   | 20   | 7    | 25   | 27   |
| 3211 | 39.5  | 29   | 14   | 40   | 25   | 34   | 12   | 27   | 44   |
| 3212 | 59    | 42   | 21   | 51   | 22.5 | 47   | 17   | 36   | 47   |
| 3213 | 41    | 29   | 12   | 36   | 24   | 32   | 12   | 26.5 | 17   |
| 3214 | 33    | 20   | 11   | 42   | 14   | 25   | 10   | 21   | 35   |
| 3215 | 44.5  | 28   | 14   | 56   | 19   | 36   | 12   | 29.5 | 41   |
| 3216 | 36    | 16   | 10   | 52   | 15.5 | 20   | 17   | 38   | 9    |
| 3217 | 34    | 20.5 | 9    | 25   | 13   | 24   | 7    | 16   | 16.5 |
| 3218 | 27    | 15   | 7    | 24   | 15   | 17   | 6    | 13   | 7    |
| 3219 | 34    | 20   | 9    | 51.5 | 16.5 | 26   | 31   | 33   | 20   |
| 3220 | 30    | 20   | 7    | 33   | 16   | 28   | 7    | 24   | 8    |
| 3221 | 27    | 21   | 7    | 21   | 13   | 25   | 6    | 15   | 4    |
| 3222 | 35    | 19   | 17   | 53.5 | 21   | 25   | 10   | 32   | 53.5 |
| 3223 | 29.5  | 14.5 | 13   | 46   | 18   | 21   | 9    | 35   | 30   |
| 3224 | 24    | 16   | 6    | 20   | 13   | 20   | 6    | 13   | 20   |
| 3225 | 33.5  | 14   | 9    | 18   | 15   | 19   | 8    | 14   | 70   |
| 3226 | 39    | 18   | 9    | 19.5 | 16   | 20   | 12   | 14   | 5    |
| 3227 | 30    | 15   | 9    | 25   | 13   | 20   | 9    | 17   | 20   |
| 3228 | 29    | 19   | 8.5  | 20   | 19   | 23   | 7    | 17   | 6    |
| 3229 | 42    | 12   | 6    | 16   | 16   | 16   | 8    | 13.5 | 9    |
| 3230 | 650   | 15   | 21   | 23   | 15   | 17   | 27   | 13   | 40   |
| 3231 | 30    | 12   | 6    | 21   | 13   | 15   | 6    | 10   | 3    |
| 3232 | 30    | 19   | 70   | 48   | 41   | 23   | 34.5 | 29   | 4    |
| 3233 | 21    | 14   | 15   | 33   | 19   | 16   | 12   | 17   | 7    |
| 3234 | 30    | 17   | 8    | 54   | 18.5 | 26   | 14   | 28   | 14   |
| 3235 | 32    | 17   | 8    | 51   | 14   | 21   | 36   | 30   | 10   |
| 3236 | 21    | 14   | 6.5  | 18   | 11.5 | 16   | 4    | 12   | 9    |
| 3237 | 40    | 18   | 8    | 37   | 15   | 19   | 8    | 18   | 44   |
| 3238 | 28    | 15   | 9    | 25   | 14   | 20   | 6    | 13   | 6    |
| 3239 | 25    | 13   | 6    | 24   | 12   | 15   | 7    | 13   | 12   |
| 3240 | 20    | 14   | 7    | 22   | 12   | 16   | 5    | 13   | 4    |
| 3241 | 36    | 16   | 17   | 40.5 | 19   | 19   | 30.5 | 20.5 | 21   |

|      |       |      |      |      |      |      |      |      |       |
|------|-------|------|------|------|------|------|------|------|-------|
| 3242 | 27    | 16.5 | 7    | 21   | 14   | 21   | 7    | 15   | 4     |
| 3243 | 37    | 19   | 13.5 | 55   | 52.5 | 23   | 16   | 21   | 12    |
| 3244 | 35    | 20   | 11   | 25.5 | 19   | 26   | 14   | 17   | 17    |
| 3245 | 27    | 12   | 8    | 24   | 15.5 | 16   | 8    | 36   | 5     |
| 3246 | 38    | 20   | 32   | 18   | 16   | 21   | 9    | 15   | 27    |
| 3247 | 25    | 15   | 7.5  | 19   | 17   | 17.5 | 7    | 13   | 6     |
| 3248 | 68    | 18   | 9    | 38   | 1004 | 27   | 7    | 53   | 25    |
| 3249 | 26    | 17   | 8    | 58.5 | 14   | 24   | 8    | 34   | 4     |
| 3250 | 25    | 16   | 8    | 24   | 15   | 17   | 19   | 22   | 3     |
| 3251 | 28    | 22   | 8    | 18   | 13   | 36   | 7    | 94   | 24    |
| 3252 | 27    | 14   | 7.5  | 26   | 12   | 18   | 8    | 15.5 | 2     |
| 3253 | 122   | 30   | 13   | 58.5 | 21   | 38.5 | 11   | 42   | 5     |
| 3254 | 21    | 11   | 6    | 20   | 17   | 12   | 8    | 11.5 | 4     |
| 3255 | 35    | 15   | 10   | 36.5 | 18   | 19   | 30   | 20   | 7     |
| 3256 | 52    | 19   | 16   | 26   | 20   | 22   | 21   | 13   | 13    |
| 3257 | 19    | 12   | 7    | 17   | 15   | 18   | 18   | 15   | 9     |
| 3258 | 23.5  | 12   | 10   | 26   | 13   | 10   | 17.5 | 6    | 8     |
| 3259 | 33    | 15   | 52   | 18   | 32   | 23.5 | 8    | 10.5 | 15    |
| 3260 | 47    | 19   | 71   | 23.5 | 27   | 28   | 11   | 13   | 16    |
| 3261 | 43    | 14   | 10   | 12   | 16   | 18   | 10   | 15   | 15    |
| 3262 | 30    | 14.5 | 9    | 20   | 29   | 17   | 7    | 21   | 16    |
| 3263 | 32    | 15   | 9    | 16   | 15   | 19.5 | 9    | 13   | 5     |
| 3264 | 115.5 | 12   | 10   | 25   | 20   | 14   | 7.5  | 14   | 246.5 |
| 3265 | 17    | 12   | 5    | 14   | 10   | 12.5 | 5    | 9    | 3     |
| 3266 | 15    | 15   | 5    | 14   | 12.5 | 17   | 5    | 10   | 3     |
| 3267 | 16    | 11.5 | 7    | 13   | 9    | 16   | 6    | 10   | 2     |
| 3268 | 19    | 12   | 7    | 21   | 10   | 13   | 5    | 11   | 4     |
| 3269 | 24.5  | 14   | 6    | 59   | 12   | 19   | 9    | 20   | 18    |
| 3270 | 40.5  | 22   | 11   | 54   | 18   | 29   | 14   | 64   | 13    |
| 3271 | 23    | 15   | 7    | 21   | 11   | 18.5 | 6    | 14   | 1     |
| 3272 | 18    | 12   | 5.5  | 11   | 12   | 16   | 6    | 9    | 2     |
| 3273 | 26    | 11   | 34.5 | 30   | 19   | 13   | 9    | 12   | 11    |
| 3274 | 80    | 15   | 21   | 50   | 54   | 20   | 23   | 25   | 12    |
| 3275 | 59    | 20   | 14   | 67   | 23   | 24.5 | 71   | 28   | 9     |
| 3276 | 19    | 12   | 10   | 15   | 23   | 13   | 6    | 11   | 8     |
| 3277 | 22    | 11   | 7    | 24   | 12   | 14   | 13   | 14   | 50    |
| 3278 | 61    | 14   | 8    | 38   | 19   | 17   | 7    | 28   | 20    |
| 3279 | 23    | 13   | 7    | 20   | 24   | 15   | 11   | 12   | 16    |
| 3280 | 31    | 17   | 9    | 36   | 19   | 23   | 9    | 17   | 38    |
| 3281 | 2     | 1    | 1    | 3    | 1    | 1    | 0    | 2    | 0     |
| 3282 | 38    | 16   | 10   | 38   | 13   | 18   | 9    | 38   | 16    |
| 3283 | 2     | 1    | 1    | 3    | 1    | 1    | 0    | 2    | 0     |
| 3284 | 27.5  | 10   | 8    | 12   | 11   | 13   | 10   | 10   | 11    |
| 3285 | 2     | 0    | 2    | 3    | 1    | 1    | 0    | 2    | 0     |
| 3286 | 11    | 8    | 6    | 7    | 6    | 10   | 4    | 8    | 1     |
| 3287 | 2     | 1    | 1    | 3    | 1    | 1    | 0    | 2    | 0     |
| 3288 | 23    | 15   | 8    | 18   | 13   | 15   | 9    | 14   | 8.5   |



|      |      |      |      |      |    |      |     |      |      |
|------|------|------|------|------|----|------|-----|------|------|
| 3289 | 2    | 1    | 1    | 3    | 1  | 1    | 0   | 2    | 0    |
| 3290 | 52   | 40   | 13   | 38   | 18 | 47   | 11  | 31   | 51   |
| 3291 | 2    | 0    | 1    | 3    | 1  | 1    | 0   | 2    | 0    |
| 3292 | 22   | 12   | 8    | 21   | 11 | 15   | 9   | 12.5 | 16   |
| 3293 | 2    | 1    | 1    | 3    | 1  | 1    | 1   | 1    | 0    |
| 3294 | 33   | 22   | 10.5 | 26   | 12 | 25.5 | 11  | 23   | 18   |
| 3295 | 2    | 1    | 1    | 3    | 1  | 1    | 0   | 2    | 0    |
| 3296 | 28   | 15   | 12   | 27   | 21 | 19   | 8   | 17   | 11   |
| 3297 | 2    | 1    | 2    | 3    | 1  | 1    | 0   | 2    | 0    |
| 3298 | 78   | 55   | 21   | 43   | 22 | 60   | 18  | 51   | 71.5 |
| 3299 | 2    | 1    | 1    | 3    | 1  | 1    | 0   | 2    | 0    |
| 3300 | 38   | 26   | 10   | 25   | 15 | 31   | 11  | 24   | 34   |
| 3301 | 2    | 1    | 2    | 3    | 1  | 1    | 0   | 2    | 0    |
| 3302 | 32   | 21   | 13   | 29   | 13 | 25.5 | 11  | 23   | 23   |
| 3303 | 2    | 1    | 1    | 3    | 1  | 1    | 0   | 2    | 0    |
| 3304 | 44.5 | 31   | 15.5 | 40   | 13 | 30   | 17  | 29   | 25   |
| 3305 | 2    | 0    | 1    | 3    | 1  | 1    | 1   | 2    | 0    |
| 3306 | 31   | 24   | 10.5 | 22   | 11 | 20.5 | 13  | 23   | 25   |
| 3307 | 2    | 1    | 1    | 3    | 1  | 1    | 0.5 | 1    | 0    |
| 3308 | 44   | 37   | 15   | 32   | 14 | 44   | 10  | 35   | 43   |
| 3309 | 2    | 1    | 1    | 3    | 1  | 1    | 0   | 1    | 0    |
| 3310 | 28   | 17   | 10   | 28   | 11 | 19   | 8   | 20   | 11   |
| 3311 | 2    | 1    | 1    | 3    | 1  | 1    | 0   | 1    | 0    |
| 3312 | 22   | 9    | 7    | 20   | 8  | 11   | 6   | 13.5 | 5    |
| 3313 | 2    | 1    | 1    | 2    | 1  | 1    | 0   | 1    | 0    |
| 3314 | 32   | 21   | 14   | 27   | 13 | 25   | 9   | 32.5 | 20   |
| 3315 | 2    | 1    | 1    | 3    | 1  | 1    | 0   | 2    | 0    |
| 3316 | 37   | 29.5 | 12   | 30   | 13 | 29   | 11  | 31   | 33   |
| 3317 | 2    | 0    | 2    | 3    | 1  | 1    | 1   | 2    | 0    |
| 3318 | 28   | 18   | 9    | 26   | 12 | 19   | 9   | 20   | 12   |
| 3319 | 2    | 1    | 1    | 3    | 1  | 1    | 0   | 2    | 0    |
| 3320 | 24   | 9    | 7    | 20.5 | 8  | 11   | 7   | 16   | 7    |
| 3321 | 2    | 1    | 1    | 4    | 1  | 0    | 0   | 1    | 0    |
| 3322 | 2    | 0    | 2    | 3    | 1  | 1    | 0   | 2    | 0    |
| 3323 | 26   | 18   | 9    | 21   | 9  | 18   | 18  | 16   | 9    |
| 3324 | 2    | 1    | 1    | 2    | 1  | 1    | 0   | 2    | 0    |
| 3325 | 30   | 22   | 11   | 23   | 12 | 21.5 | 10  | 23   | 18   |
| 3326 | 2    | 1    | 1    | 3    | 1  | 1    | 0   | 2    | 0    |
| 3327 | 56.5 | 27   | 13   | 32   | 15 | 27   | 12  | 27   | 28   |
| 3328 | 2    | 0    | 1    | 3    | 1  | 0    | 1   | 1    | 0    |
| 3329 | 25   | 10.5 | 9    | 21.5 | 7  | 15   | 7   | 14   | 10   |
| 3330 | 2    | 1    | 1    | 3    | 1  | 1    | 0   | 2    | 0    |
| 3331 | 34   | 18   | 14.5 | 23   | 11 | 21   | 8   | 22   | 19   |
| 3332 | 2    | 0.5  | 2    | 3    | 1  | 1    | 0   | 2    | 0    |
| 3333 | 33   | 10   | 8    | 21   | 9  | 13   | 7   | 13   | 11   |
| 3334 | 2    | 0.5  | 1    | 3    | 1  | 1    | 1   | 1    | 0    |
| 3335 | 30   | 19   | 21.5 | 26   | 13 | 21   | 11  | 19.5 | 27   |

|      |      |      |     |      |    |      |      |      |    |
|------|------|------|-----|------|----|------|------|------|----|
| 3336 | 2    | 0    | 1   | 2    | 1  | 0    | 0    | 2    | 0  |
| 3337 | 2    | 1    | 1   | 3    | 1  | 1    | 0    | 2    | 0  |
| 3338 | 25.5 | 13   | 9   | 26   | 13 | 15   | 9    | 21.5 | 22 |
| 3339 | 2    | 1    | 1   | 3    | 1  | 1    | 0    | 2    | 0  |
| 3340 | 31   | 20   | 10  | 25   | 16 | 23   | 9    | 18   | 16 |
| 3341 | 2    | 0    | 1   | 3    | 1  | 1    | 0    | 2    | 0  |
| 3342 | 44   | 28   | 15  | 34   | 15 | 30   | 11   | 27   | 24 |
| 3343 | 2    | 1    | 1   | 3    | 1  | 1    | 1    | 1    | 0  |
| 3344 | 39   | 29.5 | 12  | 27   | 11 | 31   | 10   | 28   | 31 |
| 3345 | 2    | 1    | 1   | 3    | 1  | 1    | 0    | 2    | 0  |
| 3346 | 26   | 19   | 8   | 24   | 10 | 22   | 7    | 12   | 30 |
| 3347 | 2    | 0    | 1   | 3    | 1  | 1    | 0    | 2    | 0  |
| 3348 | 43   | 20   | 14  | 24   | 12 | 21   | 10   | 23.5 | 20 |
| 3349 | 2    | 1    | 1.5 | 3    | 1  | 1    | 0    | 2    | 0  |
| 3350 | 45   | 31   | 17  | 31.5 | 15 | 39   | 15.5 | 75.5 | 42 |
| 3351 | 2    | 1    | 2   | 3    | 1  | 1    | 0    | 1    | 0  |
| 3352 | 104  | 8    | 7   | 17   | 11 | 12   | 12   | 12   | 9  |
| 3353 | 2.5  | 1    | 1   | 3    | 1  | 1    | 0    | 2    | 0  |
| 3354 | 2    | 1    | 1   | 3    | 1  | 1    | 0    | 2    | 0  |
| 3355 | 26   | 16   | 10  | 24   | 11 | 19.5 | 8    | 18   | 26 |
| 3356 | 2    | 1    | 1   | 3    | 1  | 1    | 0    | 2    | 0  |
| 3357 | 21   | 12   | 10  | 25   | 9  | 13   | 7    | 15   | 7  |
| 3358 | 2    | 1    | 1   | 3    | 1  | 1    | 1    | 2    | 0  |
| 3359 | 91   | 70   | 29  | 54   | 29 | 70   | 26   | 65   | 70 |
| 3360 | 2    | 1    | 1   | 3    | 1  | 1    | 0    | 2    | 0  |
| 3361 | 53   | 33   | 19  | 36   | 25 | 35   | 16   | 34   | 32 |
| 3362 | 2    | 0    | 2   | 3    | 1  | 1    | 0    | 2    | 0  |
| 3363 | 36   | 13   | 9   | 19.5 | 10 | 14   | 9    | 15   | 19 |
| 3364 | 2    | 0    | 1   | 3    | 1  | 1    | 0    | 1    | 0  |
| 3365 | 36   | 27   | 13  | 27   | 13 | 29.5 | 9.5  | 25   | 39 |
| 3366 | 2    | 1    | 1   | 3    | 1  | 0    | 0    | 2    | 0  |
| 3367 | 35   | 22   | 11  | 27.5 | 14 | 24   | 11   | 22   | 19 |
| 3368 | 2    | 0    | 1   | 3    | 1  | 0    | 0    | 2    | 0  |
| 3369 | 21   | 10   | 8   | 21   | 9  | 14   | 11   | 14   | 9  |
| 3370 | 2    | 1    | 2   | 3    | 1  | 1    | 0    | 2    | 0  |
| 3371 | 2    | 1    | 1   | 3    | 1  | 1    | 0    | 2    | 0  |
| 3372 | 2    | 0    | 1   | 2    | 1  | 1    | 0    | 2    | 0  |
| 3373 | 30   | 11   | 9   | 20   | 9  | 11   | 7    | 13   | 13 |
| 3374 | 1    | 1    | 1   | 3    | 1  | 1    | 1    | 2    | 0  |
| 3375 | 2    | 0    | 2   | 3    | 1  | 1    | 1    | 2    | 0  |
| 3376 | 2    | 1    | 2   | 3    | 1  | 1    | 0    | 2    | 0  |
| 3377 | 20   | 12   | 8   | 18.5 | 8  | 12   | 7    | 13   | 28 |
| 3378 | 2    | 1    | 1   | 3    | 1  | 1    | 0    | 2    | 1  |
| 3379 | 2    | 1    | 1   | 3    | 1  | 1    | 0    | 2    | 0  |
| 3380 | 83   | 53   | 16  | 43.5 | 23 | 45   | 20   | 35   | 43 |
| 3381 | 2    | 1    | 1   | 2    | 1  | 1    | 0    | 2    | 0  |
| 3382 | 20   | 13   | 9   | 24   | 10 | 18   | 11   | 13   | 9  |

|      |      |      |      |      |      |      |      |      |     |
|------|------|------|------|------|------|------|------|------|-----|
| 3383 | 2    | 0.5  | 1    | 3    | 2    | 0    | 1    | 2    | 0   |
| 3384 | 14   | 10   | 5    | 8    | 5    | 12   | 4    | 7    | 1   |
| 3385 | 2    | 1    | 1    | 3    | 1    | 0    | 1    | 2    | 0   |
| 3386 | 13   | 9    | 6    | 6    | 6    | 13   | 3.5  | 7.5  | 2   |
| 3387 | 2    | 0.5  | 1    | 3    | 1    | 1    | 0    | 2    | 0   |
| 3388 | 13   | 10   | 5    | 7    | 6    | 13   | 5    | 8    | 1   |
| 3389 | 2    | 0    | 1    | 3    | 1    | 1    | 1    | 2    | 0   |
| 3390 | 14   | 10   | 6    | 7    | 6    | 11   | 5    | 8    | 2   |
| 3391 | 2    | 1    | 1    | 3    | 1    | 1    | 0    | 2    | 0   |
| 3392 | 16   | 12   | 6    | 7    | 6    | 14   | 4    | 8.5  | 1   |
| 3393 | 2    | 1    | 1.5  | 3    | 1    | 1    | 0    | 2    | 0   |
| 3394 | 14   | 11.5 | 4    | 7    | 5    | 13   | 5    | 7    | 1   |
| 3395 | 2    | 1    | 1    | 3    | 1    | 1    | 0    | 2    | 0   |
| 3396 | 14   | 10   | 6    | 7    | 6    | 13   | 4    | 7    | 2   |
| 3397 | 2    | 1    | 2    | 3    | 1    | 1    | 0    | 2    | 0   |
| 3398 | 16   | 12   | 6    | 8    | 7    | 14   | 6    | 9    | 1   |
| 3399 | 2    | 1    | 2    | 3    | 1    | 1    | 0    | 2    | 0   |
| 3400 | 16   | 12   | 5    | 8    | 6    | 14.5 | 4.5  | 8    | 2   |
| 3401 | 49   | 20   | 14   | 26   | 21   | 26   | 14   | 55.5 | 60  |
| 3402 | 22   | 23   | 9    | 15   | 17   | 28   | 20   | 14   | 21  |
| 3403 | 27   | 23   | 8    | 19   | 11   | 29   | 7    | 15   | 4.5 |
| 3404 | 77.5 | 27   | 14   | 24   | 17   | 37   | 16   | 19   | 13  |
| 3405 | 27   | 26   | 9    | 23   | 19   | 27   | 8    | 15   | 7   |
| 3406 | 34   | 20   | 10   | 18   | 18   | 29   | 12   | 16   | 8   |
| 3407 | 26   | 19   | 7    | 18   | 12   | 23   | 7    | 16   | 4   |
| 3408 | 26   | 18   | 10   | 20   | 14.5 | 23   | 15   | 19   | 4   |
| 3409 | 38   | 35   | 24   | 56   | 14   | 40   | 19   | 174  | 23  |
| 3410 | 35   | 21   | 9    | 16   | 15.5 | 21   | 26   | 14   | 5   |
| 3411 | 28   | 16   | 7    | 22   | 12   | 21   | 6    | 14   | 4   |
| 3412 | 26   | 20   | 9    | 17   | 13   | 25   | 9    | 14   | 14  |
| 3413 | 28   | 25   | 11   | 16   | 22   | 31   | 8    | 17   | 13  |
| 3414 | 34   | 20   | 10   | 12   | 13   | 25   | 9    | 13   | 7   |
| 3415 | 49.5 | 26   | 45   | 27   | 18   | 30   | 22.5 | 20   | 14  |
| 3416 | 56   | 28   | 15   | 16   | 274  | 39   | 11   | 20   | 14  |
| 3417 | 77.5 | 14   | 11   | 19   | 15   | 18.5 | 15   | 13   | 49  |
| 3418 | 19   | 15   | 6    | 16   | 10   | 19.5 | 6.5  | 12   | 2   |
| 3419 | 32   | 20.5 | 9    | 31   | 16   | 26   | 8    | 17   | 41  |
| 3420 | 31   | 22   | 10   | 26   | 12   | 22   | 9    | 18   | 34  |
| 3421 | 35   | 23   | 11   | 22   | 14   | 26   | 10   | 21   | 11  |
| 3422 | 45   | 34   | 14.5 | 31   | 18   | 38   | 14   | 29   | 24  |
| 3423 | 63   | 23.5 | 9    | 25.5 | 13   | 26   | 11   | 17   | 24  |
| 3424 | 43.5 | 30   | 17   | 35   | 22   | 33   | 12   | 32   | 23  |
| 3425 | 45   | 30   | 14.5 | 35   | 16   | 34   | 79   | 26   | 22  |
| 3426 | 50   | 24   | 18   | 29   | 17   | 31.5 | 10   | 30   | 42  |
| 3427 | 30   | 19   | 8    | 19   | 12   | 25   | 8    | 15   | 14  |
| 3428 | 36   | 23   | 13   | 28   | 14   | 28   | 10   | 20   | 12  |
| 3429 | 45   | 29   | 21.5 | 28   | 15   | 29   | 13   | 22   | 25  |

|      |       |      |      |       |       |       |      |      |       |
|------|-------|------|------|-------|-------|-------|------|------|-------|
| 3430 | 64    | 45   | 20   | 71    | 20    | 52    | 19   | 44   | 99    |
| 3431 | 48    | 35   | 14   | 31    | 20    | 32    | 16   | 27   | 29    |
| 3432 | 55.5  | 40   | 18   | 34.5  | 32.5  | 40    | 14   | 33   | 40    |
| 3433 | 34    | 20   | 10   | 20    | 12.5  | 28    | 9    | 20   | 13    |
| 3434 | 35    | 24.5 | 12   | 30    | 13    | 27    | 10   | 25   | 23.5  |
| 3435 | 39    | 32   | 15   | 31    | 15    | 36    | 13   | 28   | 23    |
| 3436 | 53    | 42.5 | 22   | 41    | 20    | 45    | 17   | 39.5 | 33.5  |
| 3437 | 18    | 14   | 7    | 15    | 10    | 16    | 8    | 10   | 5     |
| 3438 | 23    | 19   | 6    | 26    | 17    | 21    | 9    | 18   | 10    |
| 3439 | 22    | 14.5 | 7    | 19    | 11    | 18    | 7.5  | 18   | 3     |
| 3440 | 29    | 17   | 8    | 17    | 14    | 24    | 11   | 33   | 8     |
| 3441 | 25    | 16   | 8    | 27.5  | 13    | 20    | 8    | 20   | 18    |
| 3442 | 27.5  | 16   | 9.5  | 18    | 12    | 23    | 10   | 15   | 6     |
| 3443 | 21    | 10   | 7    | 23    | 9     | 13    | 6    | 23   | 10    |
| 3444 | 137   | 17   | 10   | 30    | 18    | 21    | 13   | 24   | 15    |
| 3445 | 35    | 16   | 12   | 28    | 13.5  | 19    | 11   | 21   | 65    |
| 3446 | 52    | 17   | 9    | 28    | 13.5  | 21    | 12   | 22   | 47.5  |
| 3447 | 759   | 658  | 20   | 40.5  | 42    | 2017  | 44   | 109  | 386.5 |
| 3448 | 28    | 16   | 11   | 22    | 16    | 17    | 7    | 13   | 34    |
| 3449 | 29    | 15.5 | 8    | 20    | 15.5  | 20    | 7    | 14   | 4     |
| 3450 | 27    | 27   | 11   | 22    | 17    | 27    | 20   | 19   | 25    |
| 3451 | 43.5  | 14   | 9    | 48    | 12    | 18    | 24   | 19   | 9.5   |
| 3452 | 23    | 13.5 | 7    | 47    | 22    | 18    | 69   | 21   | 9     |
| 3453 | 27    | 16.5 | 10   | 42    | 13.5  | 22    | 31   | 36   | 10    |
| 3454 | 44    | 18   | 11   | 38.5  | 19    | 21    | 53   | 22   | 11    |
| 3455 | 41    | 25   | 12   | 28    | 14    | 31    | 12   | 26   | 22    |
| 3456 | 31    | 19   | 9    | 22    | 12    | 19    | 7    | 16   | 22    |
| 3457 | 34    | 15   | 11   | 41.5  | 13    | 19    | 15   | 33.5 | 23    |
| 3458 | 27    | 11   | 10   | 12    | 14    | 14    | 10   | 13   | 4     |
| 3459 | 25    | 14   | 7    | 27    | 10.5  | 22    | 37   | 45   | 9     |
| 3460 | 21    | 15   | 8    | 13.5  | 118.5 | 17    | 5    | 13   | 4     |
| 3461 | 40    | 18   | 17   | 37    | 29    | 20    | 51   | 30   | 43    |
| 3462 | 44    | 17   | 18   | 20    | 11    | 21    | 9    | 14.5 | 26    |
| 3463 | 26    | 14   | 11   | 22    | 12    | 16    | 28   | 14   | 14    |
| 3464 | 23    | 15   | 7    | 14    | 16    | 18    | 10   | 13   | 2     |
| 3465 | 24    | 14   | 7    | 19    | 9     | 14    | 8    | 13   | 40    |
| 3466 | 342   | 25   | 9    | 26    | 18.5  | 52    | 9    | 17   | 13    |
| 3467 | 19    | 12.5 | 7    | 15    | 11    | 16    | 23   | 32   | 4     |
| 3468 | 19    | 12   | 6    | 19    | 10    | 16    | 6    | 13   | 7     |
| 3469 | 118   | 86   | 40   | 76    | 42    | 92    | 30.5 | 77   | 86    |
| 3470 | 628   | 510  | 259  | 374.5 | 222   | 546   | 278  | 481  | 473   |
| 3471 | 59    | 31   | 17   | 52.5  | 21    | 37    | 13   | 34   | 36.5  |
| 3472 | 168   | 95   | 31.5 | 129   | 47    | 91    | 33   | 76   | 67    |
| 3473 | 143   | 128  | 63   | 97    | 53    | 128.5 | 45.5 | 107  | 122   |
| 3474 | 175   | 111  | 48   | 181   | 43.5  | 118   | 37.5 | 110  | 95    |
| 3475 | 133.5 | 115  | 51.5 | 102   | 78.5  | 119.5 | 49   | 108  | 85    |
| 3476 | 112   | 84   | 38   | 79    | 38    | 81    | 34   | 77.5 | 80    |

|      |       |       |       |       |       |       |      |      |       |
|------|-------|-------|-------|-------|-------|-------|------|------|-------|
| 3477 | 255.5 | 208   | 99    | 144.5 | 132.5 | 222.5 | 93   | 178  | 172   |
| 3478 | 202   | 155   | 73    | 131.5 | 63    | 155   | 60   | 134  | 154   |
| 3479 | 55    | 32    | 13    | 46    | 29    | 36    | 12   | 31   | 29.5  |
| 3480 | 130   | 42.5  | 22    | 56    | 27    | 50    | 16   | 42   | 59    |
| 3481 | 53.5  | 30    | 21    | 56.5  | 26    | 33    | 17   | 29   | 45    |
| 3482 | 98    | 66    | 33    | 86    | 37    | 69.5  | 31   | 64   | 63    |
| 3483 | 149.5 | 114   | 105   | 92    | 52    | 124   | 42   | 110  | 97    |
| 3484 | 173   | 150   | 81.5  | 127   | 77    | 161   | 68   | 162  | 169   |
| 3485 | 93    | 87    | 49    | 82.5  | 42    | 99.5  | 37.5 | 86   | 70    |
| 3486 | 136   | 117   | 70    | 116   | 68    | 124.5 | 62   | 120  | 100   |
| 3487 | 62    | 41.5  | 18    | 51    | 27    | 45.5  | 16   | 38   | 30    |
| 3488 | 135   | 98    | 46    | 78    | 41    | 107   | 42   | 90   | 79    |
| 3489 | 91.5  | 70    | 38    | 73.5  | 40    | 74    | 33   | 63   | 132.5 |
| 3490 | 96    | 67    | 33    | 81    | 30.5  | 65.5  | 29   | 66   | 56    |
| 3491 | 116   | 70    | 43    | 72.5  | 32    | 73    | 29.5 | 61   | 54    |
| 3492 | 263   | 84    | 60.5  | 77    | 38    | 91    | 32   | 75.5 | 88.5  |
| 3493 | 122   | 103.5 | 58    | 90    | 65    | 105.5 | 51   | 101  | 167   |
| 3494 | 95    | 67    | 35.5  | 74    | 30    | 76.5  | 48   | 76   | 96    |
| 3495 | 70.5  | 51    | 36    | 54    | 25    | 53    | 22   | 56   | 57    |
| 3496 | 52    | 31.5  | 29    | 48    | 21    | 38    | 13   | 34   | 35    |
| 3497 | 72.5  | 63    | 30.5  | 64    | 32    | 64.5  | 28   | 65   | 78    |
| 3498 | 259   | 65.5  | 17    | 54    | 23    | 65.5  | 14   | 33   | 69    |
| 3499 | 87    | 58    | 30    | 70    | 33    | 63    | 27   | 59   | 56.5  |
| 3500 | 56    | 37    | 15    | 47    | 27    | 42    | 16   | 29   | 44    |
| 3501 | 68    | 57    | 30    | 61    | 43.5  | 60    | 24   | 51   | 61.5  |
| 3502 | 119   | 79.5  | 35    | 68    | 39    | 128   | 27   | 64.5 | 94    |
| 3503 | 67    | 46.5  | 24    | 76    | 22    | 55    | 15   | 45   | 37    |
| 3504 | 38    | 20    | 13    | 35    | 15    | 24.5  | 8    | 22   | 22    |
| 3505 | 45    | 24    | 16    | 37    | 20    | 27    | 11   | 24   | 28    |
| 3506 | 55    | 35    | 20    | 42    | 21    | 37.5  | 19   | 33   | 70    |
| 3507 | 63    | 44.5  | 21    | 56    | 27    | 54    | 19   | 41   | 79    |
| 3508 | 86    | 33    | 26    | 57    | 23    | 38    | 31   | 36   | 29    |
| 3509 | 375   | 331   | 186.5 | 283   | 166   | 323   | 169  | 296  | 286   |
| 3510 | 50    | 29    | 13    | 53.5  | 22    | 35    | 14   | 26   | 25    |
| 3511 | 90    | 70    | 29    | 60    | 36    | 72    | 25   | 61   | 65    |
| 3512 | 119   | 76    | 36    | 82    | 32    | 81    | 31   | 76   | 90    |
| 3513 | 59    | 23    | 11    | 43.5  | 34    | 25    | 7    | 27   | 26    |
| 3514 | 55    | 32    | 12    | 45    | 24    | 36    | 11.5 | 51   | 36    |
| 3515 | 42    | 19    | 10    | 58    | 13    | 26    | 8    | 42   | 17    |
| 3516 | 43    | 24.5  | 12    | 51.5  | 20    | 29    | 9    | 35   | 26    |
| 3517 | 50    | 22    | 10    | 50.5  | 28    | 30    | 8    | 43   | 53    |
| 3518 | 32    | 19    | 8     | 40.5  | 11    | 25    | 8.5  | 28   | 11    |
| 3519 | 60    | 9     | 8     | 16    | 59    | 11    | 8    | 13   | 14    |
| 3520 | 58    | 35    | 12    | 43    | 18    | 38    | 12   | 35   | 32    |
| 3521 | 36    | 23    | 10    | 47    | 20    | 27.5  | 8    | 41   | 33    |
| 3522 | 40    | 22    | 9     | 46    | 14    | 27.5  | 8    | 33   | 17    |
| 3523 | 41    | 25    | 11    | 43    | 19    | 34    | 11   | 54   | 18    |

|      |      |      |      |      |       |      |      |      |      |
|------|------|------|------|------|-------|------|------|------|------|
| 3524 | 31   | 17   | 8    | 45   | 15    | 23   | 7    | 33.5 | 23   |
| 3525 | 31   | 18   | 10   | 41   | 14    | 21   | 7    | 21.5 | 11   |
| 3526 | 82   | 58   | 22   | 68   | 23    | 64   | 18   | 64   | 67   |
| 3527 | 39   | 25   | 10   | 40   | 16    | 29.5 | 11   | 29   | 18   |
| 3528 | 35   | 17   | 7    | 43   | 14    | 22   | 7    | 24   | 20   |
| 3529 | 34   | 17.5 | 8    | 50.5 | 14.5  | 23   | 7    | 39   | 35   |
| 3530 | 57   | 19   | 10   | 52   | 16    | 25   | 7    | 50.5 | 46   |
| 3531 | 23   | 20   | 7    | 20.5 | 9     | 25.5 | 16   | 14   | 3    |
| 3532 | 28   | 16   | 9    | 27   | 14    | 19   | 7    | 14.5 | 4    |
| 3533 | 23   | 14   | 7    | 25   | 10    | 17   | 6    | 15   | 2    |
| 3534 | 28   | 20   | 8.5  | 44   | 16    | 26.5 | 7    | 21   | 17   |
| 3535 | 25   | 15   | 7    | 28   | 10    | 20   | 6    | 14   | 4    |
| 3536 | 39   | 18   | 10   | 44   | 187   | 26   | 11   | 22   | 57   |
| 3537 | 49   | 23   | 14   | 69   | 60    | 29   | 26   | 25   | 8    |
| 3538 | 42   | 16.5 | 10   | 63   | 16    | 21   | 8    | 20   | 22.5 |
| 3539 | 32   | 19   | 13   | 18   | 22    | 21.5 | 9.5  | 22   | 5    |
| 3540 | 68   | 25   | 17   | 40   | 30    | 29   | 149  | 25   | 31   |
| 3541 | 52   | 23   | 19.5 | 43   | 83    | 28   | 21   | 24   | 15   |
| 3542 | 35   | 15   | 10   | 64   | 83    | 19   | 12   | 26   | 36   |
| 3543 | 144  | 20.5 | 17   | 56   | 17.5  | 18   | 14.5 | 44   | 118  |
| 3544 | 32   | 16   | 8    | 21   | 10    | 14   | 29   | 12   | 6    |
| 3545 | 22   | 14.5 | 11   | 20   | 18    | 15   | 28   | 14   | 9    |
| 3546 | 50   | 12   | 8    | 21   | 12    | 15   | 6    | 28   | 3    |
| 3547 | 27   | 10   | 7    | 20   | 37    | 15   | 6    | 17   | 3    |
| 3548 | 35   | 11   | 6    | 35   | 10    | 16   | 6    | 15   | 5    |
| 3549 | 23   | 14   | 14   | 15   | 12.5  | 16   | 26   | 12   | 8    |
| 3550 | 24   | 11   | 6    | 25.5 | 97    | 16   | 6    | 14.5 | 4    |
| 3551 | 20   | 14   | 7    | 12   | 9     | 14   | 8    | 9    | 64   |
| 3552 | 28   | 12   | 7.5  | 22   | 11    | 15   | 7    | 16   | 6    |
| 3553 | 27   | 17   | 18   | 16   | 40    | 16   | 18   | 13   | 7    |
| 3554 | 79   | 39   | 43   | 249  | 47    | 86   | 30   | 272  | 35   |
| 3555 | 26   | 12   | 8.5  | 39   | 9     | 14   | 6    | 21.5 | 27   |
| 3556 | 33   | 14   | 12   | 29   | 30    | 16   | 18   | 24   | 27   |
| 3557 | 26   | 13   | 8    | 73   | 11    | 19   | 12   | 22   | 6    |
| 3558 | 21.5 | 10   | 6.5  | 33.5 | 13    | 15   | 6    | 14   | 5    |
| 3559 | 19.5 | 12   | 6    | 19.5 | 9     | 16   | 6    | 11   | 20   |
| 3560 | 22   | 11   | 8    | 27   | 11    | 13   | 8    | 14   | 5    |
| 3561 | 21.5 | 11.5 | 6    | 18   | 7.5   | 15   | 6    | 11.5 | 5    |
| 3562 | 20   | 11   | 8    | 27   | 9     | 14   | 7    | 14   | 10.5 |
| 3563 | 20   | 12   | 8    | 36.5 | 25    | 15   | 6    | 27   | 12   |
| 3564 | 24   | 11   | 6    | 42   | 13    | 14   | 6    | 21.5 | 6.5  |
| 3565 | 20   | 10.5 | 7    | 21   | 18    | 14   | 7    | 14   | 8    |
| 3566 | 25   | 13.5 | 7    | 26   | 36    | 15   | 7    | 19   | 5    |
| 3567 | 25   | 12   | 7    | 24.5 | 14    | 15   | 9    | 17   | 13.5 |
| 3568 | 30   | 12   | 11   | 24   | 13    | 18   | 10   | 21   | 11   |
| 3569 | 32   | 17   | 9    | 29   | 66    | 17   | 13   | 29.5 | 6    |
| 3570 | 30   | 15   | 8    | 38   | 203.5 | 17   | 10   | 26   | 11   |

|      |       |      |      |      |      |       |      |       |      |
|------|-------|------|------|------|------|-------|------|-------|------|
| 3571 | 26.5  | 13   | 13   | 25   | 1858 | 14    | 18   | 16    | 22   |
| 3572 | 45    | 17   | 13   | 52.5 | 12   | 25    | 13   | 43    | 31   |
| 3573 | 77    | 17   | 15   | 29   | 42   | 16    | 17.5 | 19    | 6    |
| 3574 | 28    | 12   | 20   | 55.5 | 7    | 17    | 19   | 46    | 4    |
| 3575 | 15    | 10   | 5    | 13.5 | 13   | 13    | 5    | 10    | 3    |
| 3576 | 42    | 25   | 13   | 35.5 | 25.5 | 26    | 45   | 24    | 29   |
| 3577 | 66    | 46   | 28   | 55   | 23   | 52    | 21   | 51    | 59   |
| 3578 | 56.5  | 36   | 16   | 34   | 20   | 39    | 15   | 33    | 38   |
| 3579 | 65    | 43.5 | 23   | 52   | 24   | 47    | 22   | 39    | 47   |
| 3580 | 97    | 84.5 | 37   | 74   | 36   | 85    | 33   | 94.5  | 69   |
| 3581 | 60    | 45   | 35   | 46   | 20   | 40    | 16   | 37    | 36   |
| 3582 | 47    | 23   | 13   | 36   | 12   | 29    | 11   | 23.5  | 19   |
| 3583 | 40    | 21   | 14   | 63.5 | 16   | 26    | 9    | 35    | 17   |
| 3584 | 61    | 38.5 | 20   | 48   | 23   | 39    | 18   | 40    | 39   |
| 3585 | 40    | 14.5 | 11   | 36   | 17   | 16    | 17   | 24    | 13   |
| 3586 | 54    | 28   | 17   | 42   | 17   | 32    | 13   | 30.5  | 33   |
| 3587 | 73    | 58   | 31.5 | 58   | 26   | 60    | 24   | 56.5  | 50   |
| 3588 | 36.5  | 18   | 15   | 40   | 11   | 21    | 21   | 20    | 23   |
| 3589 | 126   | 93   | 42   | 78   | 40   | 96    | 35   | 93    | 83.5 |
| 3590 | 41    | 24   | 12   | 37   | 12   | 25    | 11   | 24    | 31   |
| 3591 | 122.5 | 87   | 39   | 69   | 31   | 81.5  | 26   | 74    | 84   |
| 3592 | 64    | 46   | 23   | 60   | 25   | 52.5  | 30.5 | 50    | 41   |
| 3593 | 54    | 34   | 17   | 51   | 18   | 36    | 15   | 40    | 31   |
| 3594 | 67.5  | 47   | 26   | 55   | 33.5 | 58    | 22   | 57.5  | 35   |
| 3595 | 33    | 19   | 10   | 35.5 | 13   | 23    | 13.5 | 24    | 23   |
| 3596 | 60    | 44   | 25   | 49   | 34   | 46    | 30.5 | 46    | 37   |
| 3597 | 79    | 65   | 65   | 65   | 28   | 65    | 27   | 64.5  | 63   |
| 3598 | 93    | 66   | 43   | 62   | 54   | 73    | 28   | 60    | 63   |
| 3599 | 81    | 71   | 30   | 65   | 33   | 81    | 31   | 180.5 | 50   |
| 3600 | 87.5  | 65   | 32   | 68   | 30   | 70    | 27   | 62.5  | 63   |
| 3601 | 73    | 47   | 22   | 49   | 22   | 45    | 20   | 45    | 53   |
| 3602 | 84    | 74   | 36   | 59   | 34.5 | 75    | 29   | 65.5  | 78   |
| 3603 | 134   | 99   | 56   | 105  | 48   | 104.5 | 41   | 104   | 95.5 |
| 3604 | 122   | 83   | 47   | 78.5 | 36   | 94    | 41   | 83    | 85   |
| 3605 | 122   | 95   | 48   | 95   | 41   | 96    | 40.5 | 87    | 85   |
| 3606 | 69    | 32   | 17.5 | 44   | 23   | 34    | 15.5 | 33    | 30   |
| 3607 | 53    | 34.5 | 15   | 39   | 19   | 38    | 14   | 31.5  | 29.5 |
| 3608 | 72    | 51   | 26   | 60   | 28   | 53.5  | 22   | 53    | 58   |
| 3609 | 122   | 76   | 43   | 78.5 | 35.5 | 74    | 38   | 69    | 130  |
| 3610 | 52    | 38   | 18   | 52   | 19   | 37    | 18   | 38    | 43.5 |
| 3611 | 52    | 33.5 | 21   | 40   | 17   | 43    | 16   | 40    | 31   |
| 3612 | 40    | 20   | 12   | 42.5 | 13   | 24    | 10   | 27    | 22   |
| 3613 | 77    | 52   | 26   | 57.5 | 33   | 55    | 21   | 48.5  | 46   |
| 3614 | 94    | 56   | 33   | 70   | 37.5 | 65    | 36   | 64    | 88.5 |
| 3615 | 72    | 60   | 28   | 57   | 27   | 63    | 26   | 55.5  | 76   |
| 3616 | 45    | 21   | 15   | 68   | 18   | 24    | 12   | 37    | 30   |
| 3617 | 43    | 16   | 7    | 13   | 8    | 19.5  | 6    | 13    | 6    |

|      |       |      |      |      |      |      |       |      |       |
|------|-------|------|------|------|------|------|-------|------|-------|
| 3618 | 73    | 49   | 19.5 | 62   | 27.5 | 54   | 21    | 44   | 34    |
| 3619 | 39    | 25   | 15   | 50   | 19   | 31   | 12    | 29   | 25    |
| 3620 | 127   | 72   | 40   | 77.5 | 40   | 89.5 | 29    | 77   | 76.5  |
| 3621 | 91.5  | 76.5 | 35   | 67   | 43   | 86   | 32.5  | 66.5 | 67    |
| 3622 | 82.5  | 53.5 | 29   | 63   | 33   | 63   | 26    | 50   | 46    |
| 3623 | 143.5 | 121  | 50.5 | 90   | 48   | 121  | 46    | 105  | 113.5 |
| 3624 | 135.5 | 109  | 50   | 86.5 | 58   | 109  | 41    | 97   | 100   |
| 3625 | 56    | 26   | 16   | 63   | 25   | 33   | 8     | 21   | 20    |
| 3626 | 59    | 48   | 11   | 45   | 40.5 | 45   | 11    | 24   | 16    |
| 3627 | 44    | 24   | 10   | 31.5 | 16   | 29.5 | 9     | 21   | 38    |
| 3628 | 55    | 34   | 18   | 50.5 | 27   | 38   | 144.5 | 28   | 29    |
| 3629 | 33    | 19   | 8    | 44   | 12   | 26   | 6     | 17   | 7     |
| 3630 | 25    | 18   | 8    | 13   | 21.5 | 23   | 5     | 12   | 5     |
| 3631 | 40.5  | 25   | 11   | 51   | 26   | 37   | 9     | 36   | 20    |
| 3632 | 47    | 27   | 10   | 22   | 12   | 54   | 6     | 15   | 54    |
| 3633 | 121   | 26.5 | 24   | 34   | 27   | 34   | 62    | 51   | 9     |
| 3634 | 60    | 26   | 18   | 46   | 22   | 26   | 12    | 19   | 11    |
| 3635 | 23.5  | 16   | 5    | 7    | 6    | 22   | 4     | 8    | 2     |
| 3636 | 90    | 17.5 | 7    | 35.5 | 9    | 23   | 11    | 17   | 4     |
| 3637 | 71    | 26   | 12   | 22   | 15.5 | 56   | 51    | 19.5 | 10    |
| 3638 | 24    | 17   | 6    | 14   | 8    | 25   | 6     | 12   | 8     |
| 3639 | 41    | 18   | 8    | 16   | 14   | 25   | 11    | 16   | 8     |
| 3640 | 44    | 20   | 13   | 22   | 87   | 26   | 11    | 16   | 16    |
| 3641 | 27    | 17   | 7    | 29   | 11   | 23   | 6     | 13   | 3     |
| 3642 | 47    | 19   | 13   | 27   | 17   | 23   | 13    | 19   | 16    |
| 3643 | 36    | 17.5 | 14   | 17   | 13   | 22.5 | 20    | 12   | 21    |
| 3644 | 28    | 19   | 16   | 23   | 11   | 22   | 11.5  | 16   | 3     |
| 3645 | 42    | 22   | 12   | 56   | 19   | 35   | 50    | 68   | 26    |
| 3646 | 56    | 28   | 11   | 43   | 12   | 37   | 78.5  | 31   | 22    |
| 3647 | 234   | 26   | 26   | 60   | 70   | 40   | 125   | 108  | 53.5  |
| 3648 | 35.5  | 17   | 66   | 28   | 96   | 21   | 16    | 18   | 15    |
| 3649 | 27    | 16.5 | 7    | 22   | 29   | 24   | 14    | 16   | 4.5   |
| 3650 | 32    | 18   | 8    | 16   | 13   | 23   | 10    | 12   | 8     |
| 3651 | 74.5  | 22   | 15   | 65.5 | 14.5 | 24   | 11    | 17   | 10    |
| 3652 | 50    | 26   | 13   | 44   | 41   | 33   | 11    | 25   | 32    |
| 3653 | 39    | 23   | 12.5 | 40.5 | 39   | 28   | 13    | 25   | 26.5  |
| 3654 | 34    | 17   | 12   | 32   | 12   | 24   | 6     | 16   | 24    |
| 3655 | 64    | 46   | 20   | 45   | 20.5 | 50   | 19.5  | 39   | 33    |
| 3656 | 53    | 28   | 13   | 40   | 19.5 | 35   | 14    | 28   | 20.5  |
| 3657 | 71    | 52   | 25   | 66   | 25   | 57   | 20    | 51   | 48    |
| 3658 | 66    | 50   | 26   | 57   | 27   | 55   | 24    | 47   | 95.5  |
| 3659 | 83    | 64   | 29   | 76   | 27   | 68   | 25    | 54.5 | 51    |
| 3660 | 122   | 90   | 54   | 98.5 | 49.5 | 93.5 | 49    | 84   | 138   |
| 3661 | 55    | 36   | 24   | 61   | 17   | 42.5 | 24.5  | 34.5 | 38    |
| 3662 | 119   | 98   | 46   | 76   | 59.5 | 106  | 38    | 86   | 97    |
| 3663 | 80    | 60   | 27   | 59   | 29.5 | 62   | 23    | 51   | 62    |
| 3664 | 80    | 53   | 69.5 | 65   | 26   | 59.5 | 24    | 53   | 49    |



|      |       |      |      |      |       |      |    |      |      |
|------|-------|------|------|------|-------|------|----|------|------|
| 3665 | 92    | 66.5 | 36   | 81   | 42.5  | 75   | 31 | 67.5 | 68   |
| 3666 | 122   | 92   | 45   | 76   | 41    | 96   | 36 | 85   | 85   |
| 3667 | 69    | 35   | 16   | 54   | 37    | 43   | 27 | 36   | 37   |
| 3668 | 32    | 20   | 14.5 | 37   | 11.5  | 23   | 7  | 15   | 13.5 |
| 3669 | 100.5 | 37   | 22   | 52   | 55    | 42   | 14 | 33   | 45   |
| 3670 | 50    | 17   | 10   | 38   | 13    | 22   | 7  | 16   | 27   |
| 3671 | 90.5  | 56   | 29.5 | 66   | 34    | 67   | 25 | 54   | 61.5 |
| 3672 | 35    | 19   | 10   | 51   | 14    | 27   | 8  | 23.5 | 18   |
| 3673 | 41.5  | 19   | 10   | 42   | 20    | 26   | 10 | 17   | 16   |
| 3674 | 44    | 15   | 22   | 53   | 13    | 22   | 9  | 23   | 33   |
| 3675 | 51    | 26   | 13   | 49   | 12    | 35.5 | 8  | 24   | 37   |
| 3676 | 31    | 21   | 10   | 34   | 13    | 22   | 11 | 13   | 50   |
| 3677 | 36    | 22   | 9    | 31   | 15    | 24   | 7  | 15   | 18   |
| 3678 | 54    | 24   | 12   | 48   | 16    | 27   | 12 | 24   | 23   |
| 3679 | 55    | 32   | 16   | 48   | 23.5  | 39   | 13 | 32   | 53   |
| 3680 | 44    | 26   | 13   | 39   | 17    | 28   | 13 | 26   | 62   |
| 3681 | 46    | 21.5 | 10   | 40   | 10    | 26   | 9  | 17   | 37   |
| 3682 | 41    | 25.5 | 11   | 38   | 12    | 30   | 11 | 25   | 18   |
| 3683 | 42    | 24.5 | 12   | 36   | 12.5  | 28   | 12 | 25   | 30   |
| 3684 | 35    | 15   | 9    | 39   | 14    | 22   | 8  | 18   | 21   |
| 3685 | 42    | 31   | 15   | 45   | 46    | 36   | 12 | 32   | 39   |
| 3686 | 63    | 43.5 | 24   | 56   | 22    | 49   | 18 | 45.5 | 57   |
| 3687 | 59.5  | 41   | 22   | 52   | 19.5  | 48   | 18 | 45   | 33   |
| 3688 | 74    | 59   | 27   | 62   | 29    | 62   | 21 | 52   | 66   |
| 3689 | 121   | 93   | 52   | 79   | 37    | 95   | 36 | 80   | 75.5 |
| 3690 | 49    | 36   | 22   | 44   | 19    | 37   | 12 | 35   | 28   |
| 3691 | 61    | 43.5 | 20   | 48.5 | 22    | 46   | 19 | 41   | 35   |
| 3692 | 76    | 48   | 31   | 63   | 22    | 59   | 25 | 46   | 40   |
| 3693 | 107   | 64.5 | 32.5 | 65   | 28    | 68   | 27 | 59.5 | 67   |
| 3694 | 36    | 24   | 12.5 | 34   | 14    | 29   | 10 | 24   | 26   |
| 3695 | 69.5  | 47   | 22   | 58   | 22    | 60   | 20 | 54   | 77   |
| 3696 | 38    | 46   | 26   | 72   | 37    | 41   | 16 | 41   | 105  |
| 3697 | 78.5  | 68.5 | 28   | 66   | 30.5  | 67   | 28 | 60   | 75   |
| 3698 | 31    | 14.5 | 7    | 28   | 9     | 18   | 8  | 14   | 23   |
| 3699 | 28    | 10   | 6    | 26   | 7     | 15   | 5  | 14   | 6    |
| 3700 | 24    | 11   | 6    | 24   | 6     | 15   | 12 | 11   | 3    |
| 3701 | 26    | 14   | 7    | 22   | 7     | 18   | 7  | 10.5 | 12   |
| 3702 | 31    | 13   | 9    | 28   | 15    | 14   | 21 | 15.5 | 4    |
| 3703 | 25.5  | 14   | 6    | 37   | 10.5  | 20   | 31 | 35.5 | 13   |
| 3704 | 28    | 12   | 7    | 35   | 9     | 14   | 6  | 9    | 3    |
| 3705 | 30    | 13   | 41   | 22   | 161.5 | 15   | 11 | 15   | 9    |
| 3706 | 46    | 12   | 10   | 16   | 10    | 13   | 7  | 12   | 4    |
| 3707 | 39.5  | 17   | 9    | 20   | 13    | 27   | 21 | 84   | 5    |
| 3708 | 51    | 11   | 5.5  | 28.5 | 8     | 15   | 8  | 12.5 | 14   |
| 3709 | 47    | 19   | 19   | 60   | 23    | 30   | 48 | 32   | 42   |
| 3710 | 25    | 11   | 7    | 18   | 7.5   | 15   | 6  | 21   | 4    |
| 3711 | 20    | 10   | 6    | 18.5 | 7     | 13   | 6  | 11   | 2    |

|      |      |      |      |       |      |      |      |      |      |
|------|------|------|------|-------|------|------|------|------|------|
| 3712 | 20   | 12   | 6    | 19    | 7    | 13   | 17   | 10   | 3    |
| 3713 | 18   | 9    | 6    | 23    | 8    | 14   | 5    | 15   | 6    |
| 3714 | 44   | 11   | 8    | 22    | 12   | 19   | 11   | 46   | 10   |
| 3715 | 23   | 10   | 6    | 26    | 12   | 15   | 21   | 14   | 4    |
| 3716 | 64   | 14   | 8    | 18    | 15   | 15   | 6    | 11.5 | 6    |
| 3717 | 33   | 12   | 7    | 14    | 8    | 16   | 6    | 13   | 4    |
| 3718 | 40   | 19   | 17   | 117.5 | 27   | 27   | 19   | 68   | 6    |
| 3719 | 281  | 13.5 | 10   | 28    | 12   | 18   | 9    | 14   | 27   |
| 3720 | 42   | 8    | 7    | 20    | 18   | 8    | 6    | 9    | 8    |
| 3721 | 36   | 10.5 | 13   | 9.5   | 14   | 15   | 5    | 12   | 6    |
| 3722 | 42   | 10   | 17.5 | 22.5  | 10   | 15   | 12   | 11.5 | 22.5 |
| 3723 | 27   | 20   | 6    | 12    | 8    | 26   | 5    | 13   | 4    |
| 3724 | 23   | 11   | 5    | 16    | 6.5  | 15   | 6    | 10   | 2    |
| 3725 | 125  | 92.5 | 51.5 | 98    | 57   | 105  | 43   | 84   | 93   |
| 3726 | 53   | 34   | 23   | 41    | 29   | 39   | 10   | 29   | 78   |
| 3727 | 53   | 30   | 12   | 67.5  | 20.5 | 39   | 9    | 34   | 16   |
| 3728 | 64   | 40   | 18   | 47    | 23.5 | 44   | 15   | 39   | 40   |
| 3729 | 37   | 24   | 15   | 55.5  | 26   | 30   | 9    | 23   | 25   |
| 3730 | 91   | 53   | 26.5 | 63    | 33   | 69   | 27.5 | 51   | 64   |
| 3731 | 48   | 26   | 10   | 54    | 39   | 36   | 8    | 39   | 16   |
| 3732 | 51   | 22   | 11   | 42.5  | 30   | 29   | 9    | 24   | 29   |
| 3733 | 49   | 27   | 12   | 42    | 27   | 39.5 | 8    | 24   | 33   |
| 3734 | 57.5 | 36   | 17   | 44    | 26   | 39.5 | 15   | 29   | 39   |
| 3735 | 65.5 | 33.5 | 15   | 44    | 25   | 39   | 14   | 37.5 | 22   |
| 3736 | 128  | 58.5 | 29   | 64.5  | 34   | 64.5 | 26   | 54.5 | 66   |
| 3737 | 70   | 54   | 23.5 | 50    | 25   | 53.5 | 17   | 48   | 32   |
| 3738 | 57   | 29   | 17   | 53    | 17   | 57   | 11   | 24.5 | 36   |
| 3739 | 56   | 32   | 16   | 39    | 21   | 36   | 23   | 32   | 20   |
| 3740 | 32   | 18   | 8    | 37    | 18   | 25   | 6    | 20   | 42   |
| 3741 | 52.5 | 27   | 12   | 32    | 20   | 31   | 10   | 22   | 15   |
| 3742 | 41.5 | 26   | 11.5 | 39    | 23   | 31   | 8.5  | 28   | 26   |
| 3743 | 31   | 18   | 7    | 29    | 18   | 24   | 10   | 17   | 19   |
| 3744 | 83   | 29   | 17   | 48    | 28   | 38   | 13   | 29   | 25   |
| 3745 | 59   | 45   | 21.5 | 47    | 27   | 45.5 | 16   | 43   | 35   |
| 3746 | 75   | 54   | 34   | 61    | 35   | 60   | 21   | 53   | 39   |
| 3747 | 79   | 49   | 21   | 48    | 21   | 47.5 | 16   | 35   | 41.5 |
| 3748 | 52   | 22   | 21   | 40    | 22.5 | 27   | 11   | 31.5 | 24   |
| 3749 | 36   | 20   | 8    | 30    | 16   | 25   | 8    | 17   | 18   |
| 3750 | 40   | 27   | 11   | 48    | 15   | 31   | 12   | 25   | 28   |
| 3751 | 204  | 53   | 27   | 63    | 32   | 58   | 50   | 51.5 | 54   |
| 3752 | 76.5 | 57   | 25.5 | 59.5  | 48.5 | 59   | 19   | 58   | 44   |
| 3753 | 92   | 75   | 32   | 75    | 32   | 76.5 | 29   | 96   | 55   |
| 3754 | 40   | 25   | 7    | 18    | 18   | 29   | 6    | 39   | 38   |
| 3755 | 38   | 18   | 9    | 53    | 21   | 26.5 | 8    | 25   | 70   |
| 3756 | 69   | 41   | 18   | 51.5  | 27   | 52   | 17.5 | 44   | 43   |
| 3757 | 38   | 20   | 9    | 47.5  | 20   | 25   | 8    | 27   | 10   |
| 3758 | 45   | 20   | 9.5  | 32    | 20   | 31   | 8    | 27   | 24   |

|      |      |      |      |      |      |      |      |       |       |
|------|------|------|------|------|------|------|------|-------|-------|
| 3759 | 41   | 24   | 9    | 36   | 18   | 34   | 7    | 20    | 58.5  |
| 3760 | 47   | 23   | 13   | 50   | 24   | 25.5 | 11   | 28    | 14    |
| 3761 | 54   | 36   | 17   | 42.5 | 25   | 40   | 16   | 33    | 31    |
| 3762 | 61   | 32   | 16   | 48.5 | 27   | 39   | 14   | 35    | 20    |
| 3763 | 36   | 20   | 9    | 36   | 24   | 23   | 8    | 21    | 122.5 |
| 3764 | 56.5 | 35.5 | 14   | 50   | 22   | 37   | 13   | 34.5  | 33.5  |
| 3765 | 44   | 23.5 | 15   | 43   | 26.5 | 31.5 | 8    | 25.5  | 54    |
| 3766 | 25   | 16   | 62.5 | 36   | 32.5 | 21   | 23   | 15    | 4     |
| 3767 | 36   | 19   | 6    | 25   | 29   | 22   | 7    | 17    | 6     |
| 3768 | 26   | 16   | 7    | 19   | 12   | 20   | 5    | 14    | 3     |
| 3769 | 34   | 16   | 8    | 18   | 14   | 20   | 6    | 11    | 22    |
| 3770 | 22.5 | 14   | 6    | 9    | 14   | 20   | 4    | 11    | 9     |
| 3771 | 32   | 17   | 7    | 61   | 11   | 24   | 6    | 25.5  | 10    |
| 3772 | 31.5 | 17   | 13   | 24   | 15   | 19   | 6    | 15.5  | 3     |
| 3773 | 61   | 20   | 8    | 54   | 15   | 22.5 | 7    | 29    | 6     |
| 3774 | 29   | 15   | 28   | 20   | 13   | 21   | 9    | 16    | 3     |
| 3775 | 33   | 16   | 11   | 28   | 61   | 21.5 | 24   | 13    | 11    |
| 3776 | 48   | 19   | 12   | 38   | 35   | 26   | 9    | 20    | 44    |
| 3777 | 32   | 16   | 9    | 27   | 44   | 21   | 55   | 18    | 17    |
| 3778 | 56   | 24   | 15   | 46   | 149  | 45   | 13   | 29    | 33    |
| 3779 | 31   | 19   | 8    | 52   | 18   | 22   | 6    | 31    | 19    |
| 3780 | 29   | 15   | 8    | 36   | 16.5 | 18   | 6    | 24    | 22    |
| 3781 | 33   | 18   | 8    | 61   | 25   | 22   | 8    | 44    | 28    |
| 3782 | 29   | 16   | 7    | 57   | 17.5 | 21   | 13   | 28    | 9     |
| 3783 | 35   | 16   | 10   | 41.5 | 20   | 22   | 7    | 26    | 25    |
| 3784 | 31   | 17   | 7    | 35   | 18   | 21   | 13   | 20    | 33    |
| 3785 | 34   | 19   | 10   | 55   | 23   | 23   | 9    | 34    | 24    |
| 3786 | 54   | 22   | 24   | 69.5 | 37   | 26   | 7    | 36    | 12    |
| 3787 | 26   | 11.5 | 7    | 41   | 27   | 16   | 8    | 20    | 18    |
| 3788 | 33   | 15   | 8    | 32.5 | 13   | 19   | 6    | 21    | 4     |
| 3789 | 30   | 16   | 9    | 34   | 12   | 20.5 | 6    | 18    | 33    |
| 3790 | 24   | 14   | 6    | 12   | 12   | 19   | 6    | 11    | 4     |
| 3791 | 28   | 15   | 8    | 17   | 50   | 17   | 6    | 19    | 36    |
| 3792 | 31   | 12   | 7    | 35   | 10   | 16   | 7    | 15    | 19    |
| 3793 | 29   | 16   | 7    | 22   | 11   | 19   | 6    | 16    | 3     |
| 3794 | 23   | 13   | 6    | 11   | 10   | 17   | 11   | 10    | 2     |
| 3795 | 24   | 13   | 6    | 23   | 15   | 17   | 5    | 12    | 18    |
| 3796 | 69   | 41   | 11   | 20   | 33.5 | 158  | 19   | 28    | 25    |
| 3797 | 19   | 14   | 5    | 7    | 6    | 17   | 5    | 7     | 1     |
| 3798 | 23   | 25   | 6    | 9    | 8    | 32   | 7    | 13    | 2     |
| 3799 | 80   | 15   | 7    | 11.5 | 15   | 18.5 | 7    | 12    | 4     |
| 3800 | 33   | 17   | 8    | 22.5 | 19   | 19   | 7    | 14    | 16.5  |
| 3801 | 43   | 21   | 11   | 32   | 37   | 25.5 | 10.5 | 17    | 10    |
| 3802 | 21   | 14   | 6    | 9    | 15   | 17   | 5    | 9     | 5     |
| 3803 | 42   | 30   | 179  | 85   | 15   | 37   | 12   | 54    | 7     |
| 3804 | 162  | 122  | 55   | 91   | 48   | 125  | 40   | 104.5 | 103.5 |
| 3805 | 74.5 | 62   | 27   | 58   | 32   | 70   | 23   | 64    | 78    |

|      |      |      |      |      |      |      |      |      |      |
|------|------|------|------|------|------|------|------|------|------|
| 3806 | 25   | 23   | 8.5  | 42   | 12   | 23   | 10.5 | 19.5 | 88   |
| 3807 | 39.5 | 31   | 14   | 41   | 17   | 35   | 13   | 28   | 21   |
| 3808 | 62   | 51   | 21   | 54   | 27.5 | 55   | 17.5 | 46   | 38   |
| 3809 | 30   | 20   | 14   | 38   | 15   | 28   | 12   | 21   | 13   |
| 3810 | 48   | 39.5 | 19.5 | 55   | 30   | 46   | 17   | 43   | 72   |
| 3811 | 46   | 34   | 14.5 | 48   | 22   | 39.5 | 15   | 40   | 28   |
| 3812 | 35   | 27   | 14   | 38   | 23   | 34   | 13   | 27   | 21   |
| 3813 | 30.5 | 21   | 18   | 42   | 125  | 25   | 40   | 23   | 17   |
| 3814 | 28   | 20   | 28   | 52   | 19   | 26   | 28   | 30.5 | 10   |
| 3815 | 60   | 21   | 17   | 56   | 14   | 29   | 22   | 20.5 | 12   |
| 3816 | 68   | 18.5 | 11   | 25   | 13   | 26   | 15   | 28   | 7    |
| 3817 | 24   | 20   | 12   | 33   | 16   | 25   | 9    | 31   | 27   |
| 3818 | 22   | 17   | 8    | 16   | 11   | 25   | 5    | 11   | 7    |
| 3819 | 61   | 22   | 14   | 33   | 22   | 23   | 13   | 21   | 11   |
| 3820 | 33   | 17   | 11   | 38.5 | 18   | 22   | 11   | 25   | 26.5 |
| 3821 | 74   | 21   | 19   | 29.5 | 32   | 27   | 11   | 52   | 73   |
| 3822 | 96   | 52   | 16   | 24.5 | 19   | 137  | 33   | 23   | 24   |
| 3823 | 28   | 20   | 12   | 25   | 13   | 21   | 10   | 18   | 14   |
| 3824 | 28   | 15   | 12   | 23.5 | 13   | 25   | 12   | 17   | 10   |
| 3825 | 33   | 18   | 7    | 22   | 13   | 25   | 7    | 16.5 | 9    |
| 3826 | 65   | 26   | 16   | 49   | 20   | 33   | 11   | 72   | 49   |
| 3827 | 31   | 25   | 8    | 54   | 17   | 31   | 11   | 84.5 | 15   |
| 3828 | 23   | 16   | 9    | 18   | 12   | 22   | 8    | 15   | 5    |
| 3829 | 24   | 16   | 7    | 32   | 17   | 21   | 17.5 | 26   | 30   |
| 3830 | 24   | 18   | 13   | 33   | 13   | 24   | 14   | 18   | 8    |
| 3831 | 24   | 16   | 9    | 25   | 28   | 23.5 | 12   | 15   | 4    |
| 3832 | 76.5 | 19   | 10   | 24   | 12   | 21   | 11   | 16   | 8    |
| 3833 | 30   | 21   | 11.5 | 41   | 14   | 27   | 9    | 41   | 6    |
| 3834 | 26   | 20   | 7.5  | 25   | 13   | 23.5 | 9    | 18   | 7    |
| 3835 | 24   | 15.5 | 7    | 25   | 13   | 20.5 | 10   | 18.5 | 5    |
| 3836 | 21   | 15   | 10   | 19   | 13   | 21   | 8    | 17   | 5    |
| 3837 | 26   | 18   | 13   | 24   | 19   | 19   | 8    | 14   | 6    |
| 3838 | 38   | 17   | 9    | 49   | 14   | 23.5 | 10   | 23   | 4    |
| 3839 | 28   | 19.5 | 10   | 26   | 20   | 23   | 72   | 31   | 41.5 |
| 3840 | 17   | 16.5 | 8    | 13   | 12   | 20   | 10   | 11   | 4.5  |
| 3841 | 31   | 22   | 11   | 39   | 16   | 27   | 9    | 23   | 16   |
| 3842 | 56.5 | 44.5 | 22   | 51   | 25   | 53   | 18   | 45.5 | 43   |
| 3843 | 82.5 | 64.5 | 26.5 | 55   | 39   | 70   | 24   | 60   | 59   |
| 3844 | 105  | 82   | 41   | 79   | 38   | 79   | 32.5 | 82   | 86   |
| 3845 | 45   | 33   | 18   | 41   | 15   | 36   | 12.5 | 32   | 34   |
| 3846 | 63   | 56   | 25   | 50   | 56.5 | 57   | 20   | 47   | 47   |
| 3847 | 62   | 46   | 23   | 57   | 27   | 53   | 21   | 45   | 87   |
| 3848 | 25   | 18   | 10   | 37   | 13   | 24   | 9    | 21   | 29   |
| 3849 | 37   | 19   | 10   | 33   | 11   | 24   | 9    | 19   | 14   |
| 3850 | 57   | 40   | 18   | 48   | 19   | 46   | 16   | 37   | 32.5 |
| 3851 | 28   | 19   | 11   | 37   | 14.5 | 23   | 9    | 19   | 20.5 |
| 3852 | 73   | 55   | 29   | 61   | 28   | 59   | 23   | 53   | 65   |

|      |      |      |      |       |      |       |      |       |       |
|------|------|------|------|-------|------|-------|------|-------|-------|
| 3853 | 28.5 | 19   | 10   | 23    | 11   | 20.5  | 8    | 17    | 16    |
| 3854 | 36.5 | 17   | 6    | 35.5  | 19   | 20    | 7    | 19    | 12    |
| 3855 | 83   | 73.5 | 37   | 82.5  | 33   | 83    | 30   | 65    | 67    |
| 3856 | 45   | 37   | 18   | 52    | 25.5 | 40    | 16   | 37    | 34    |
| 3857 | 27.5 | 22   | 14   | 27    | 14   | 29    | 11   | 17    | 19    |
| 3858 | 61   | 51   | 19.5 | 43    | 23   | 53    | 18.5 | 42    | 43    |
| 3859 | 65   | 51   | 24.5 | 71    | 30   | 60    | 21   | 56    | 44    |
| 3860 | 52   | 41   | 22   | 47    | 21   | 43    | 14   | 40    | 65    |
| 3861 | 55   | 46   | 18   | 39    | 19   | 46    | 16   | 32    | 35    |
| 3862 | 88   | 65   | 32.5 | 80    | 34   | 66    | 44   | 68    | 59    |
| 3863 | 109  | 87   | 54   | 103   | 50   | 91    | 54   | 88.5  | 81    |
| 3864 | 63   | 47   | 23   | 50    | 23   | 49    | 18   | 47    | 46    |
| 3865 | 75   | 63   | 34   | 83    | 31   | 64    | 34   | 61    | 62    |
| 3866 | 41   | 31   | 20   | 55.5  | 29   | 35    | 17   | 35    | 23.5  |
| 3867 | 72   | 80   | 20   | 48    | 22   | 55    | 20   | 40    | 58    |
| 3868 | 64   | 49   | 22   | 50    | 24   | 57.5  | 20   | 45    | 44    |
| 3869 | 27.5 | 19   | 14   | 24.5  | 12   | 20    | 15   | 14    | 9     |
| 3870 | 19   | 14   | 12   | 33    | 10.5 | 20    | 8    | 15    | 3     |
| 3871 | 22   | 15   | 8    | 29    | 12   | 18    | 7    | 20    | 7     |
| 3872 | 22.5 | 13   | 14   | 24    | 12   | 17    | 70   | 16    | 8     |
| 3873 | 22   | 14   | 35   | 31    | 13   | 18    | 6    | 11    | 18.5  |
| 3874 | 23   | 16   | 16   | 67    | 13   | 41    | 10   | 174.5 | 13    |
| 3875 | 22   | 17   | 7    | 34    | 10   | 18    | 9    | 19    | 19    |
| 3876 | 17   | 14   | 7    | 15    | 9    | 18    | 6    | 9     | 4     |
| 3877 | 32   | 19   | 10   | 33.5  | 18   | 24    | 9    | 28    | 9     |
| 3878 | 20   | 14   | 6    | 30    | 11   | 20    | 8    | 14    | 4     |
| 3879 | 34   | 15   | 9    | 43    | 47   | 19    | 7    | 30    | 77    |
| 3880 | 41   | 23.5 | 10   | 44    | 32.5 | 28    | 8    | 63    | 50    |
| 3881 | 26   | 15   | 21   | 33    | 14   | 22    | 13.5 | 21    | 12    |
| 3882 | 29   | 18.5 | 11   | 40    | 14.5 | 23    | 16   | 21    | 19    |
| 3883 | 27   | 17   | 8    | 47    | 20   | 20.5  | 9    | 37    | 11    |
| 3884 | 23   | 15   | 8    | 42    | 12   | 21    | 7    | 25    | 17    |
| 3885 | 16   | 14   | 8    | 15.5  | 11   | 17    | 7    | 13    | 3     |
| 3886 | 50   | 24   | 9    | 24    | 11   | 31    | 9    | 18    | 4     |
| 3887 | 35.5 | 28   | 10   | 55    | 20.5 | 38    | 9    | 42    | 21    |
| 3888 | 32   | 25   | 11   | 28    | 18   | 34    | 11   | 17    | 29    |
| 3889 | 25   | 22   | 7    | 27.5  | 24   | 32    | 7    | 22    | 5     |
| 3890 | 19   | 17   | 7    | 17    | 10   | 24    | 7    | 13    | 5     |
| 3891 | 29   | 34   | 10   | 26    | 43   | 32    | 27   | 17    | 9     |
| 3892 | 26   | 14   | 11.5 | 32    | 19   | 18    | 8    | 31    | 18    |
| 3893 | 112  | 97   | 69   | 116.5 | 54   | 97    | 52   | 283   | 73    |
| 3894 | 37.5 | 26.5 | 24   | 50    | 26   | 28    | 19   | 97.5  | 38    |
| 3895 | 200  | 126  | 76   | 121   | 78   | 130.5 | 67   | 128   | 131.5 |
| 3896 | 56   | 39.5 | 23   | 55.5  | 30   | 45    | 15   | 53    | 21    |
| 3897 | 83   | 70   | 44   | 80    | 38   | 70.5  | 31   | 114   | 50    |
| 3898 | 72   | 58   | 38   | 72.5  | 37   | 58    | 32   | 119   | 47    |
| 3899 | 106  | 63   | 36   | 88    | 32.5 | 66    | 32   | 83    | 71    |

|      |       |      |      |       |      |       |      |       |       |
|------|-------|------|------|-------|------|-------|------|-------|-------|
| 3900 | 78    | 59   | 35   | 64    | 35.5 | 62    | 26   | 95.5  | 42    |
| 3901 | 37    | 23   | 16.5 | 42.5  | 20   | 25    | 11   | 33.5  | 19.5  |
| 3902 | 39    | 22   | 14   | 37    | 16   | 26    | 10   | 49    | 37    |
| 3903 | 38    | 26   | 22.5 | 41    | 22   | 30    | 14   | 73    | 27    |
| 3904 | 34    | 24   | 16   | 36    | 17   | 29    | 11   | 43    | 13    |
| 3905 | 70    | 46   | 27.5 | 56    | 32   | 41    | 25   | 100   | 43    |
| 3906 | 92    | 87   | 57   | 108   | 66   | 94    | 45   | 371   | 89    |
| 3907 | 60    | 31   | 19   | 41    | 21   | 33    | 16   | 61    | 35    |
| 3908 | 52    | 36   | 23   | 49    | 23   | 43    | 16   | 57    | 29    |
| 3909 | 162   | 23   | 17   | 35    | 44   | 28    | 13   | 37    | 12    |
| 3910 | 66.5  | 60   | 46   | 82    | 33   | 56    | 28   | 175.5 | 67    |
| 3911 | 74.5  | 65   | 33   | 60    | 29.5 | 67    | 24.5 | 89.5  | 57    |
| 3912 | 52    | 34   | 19   | 46    | 27   | 31    | 16   | 50.5  | 23    |
| 3913 | 121.5 | 93   | 48   | 78.5  | 45.5 | 87    | 33   | 96.5  | 102   |
| 3914 | 68    | 53   | 32   | 51    | 34   | 55.5  | 23   | 78    | 41    |
| 3915 | 40    | 28   | 21   | 58    | 140  | 29.5  | 15   | 58.5  | 28    |
| 3916 | 31    | 21   | 20   | 44.5  | 23.5 | 16    | 14   | 97    | 18    |
| 3917 | 107   | 97   | 52   | 81    | 55   | 97    | 39   | 123.5 | 99    |
| 3918 | 37    | 25   | 15   | 37    | 16   | 24    | 12   | 59    | 26.5  |
| 3919 | 41    | 32   | 18   | 33    | 20   | 32.5  | 14   | 41.5  | 28    |
| 3920 | 72    | 57   | 38   | 61    | 34   | 53    | 24   | 124.5 | 43    |
| 3921 | 75    | 57   | 35   | 65    | 37   | 56    | 25   | 72    | 201   |
| 3922 | 74    | 43   | 27   | 51    | 29   | 45    | 22   | 68    | 38    |
| 3923 | 62    | 43   | 24   | 46    | 27   | 46    | 20   | 51.5  | 33    |
| 3924 | 148.5 | 133  | 93   | 115   | 91   | 130   | 68   | 123   | 137.5 |
| 3925 | 37    | 20   | 14   | 39    | 18   | 23    | 17   | 42    | 36    |
| 3926 | 89.5  | 56   | 29.5 | 66    | 33   | 55    | 24   | 73    | 53    |
| 3927 | 70    | 49   | 33   | 57    | 35   | 48.5  | 26   | 70    | 55    |
| 3928 | 67    | 42.5 | 24.5 | 70.5  | 25   | 45    | 21   | 63    | 62    |
| 3929 | 161   | 125  | 66   | 106.5 | 54.5 | 125.5 | 59.5 | 123   | 123   |
| 3930 | 68    | 56   | 32   | 59    | 49   | 55.5  | 27   | 64.5  | 54    |
| 3931 | 44.5  | 33   | 23   | 41    | 20   | 35    | 15   | 47.5  | 38    |
| 3932 | 45    | 32   | 19   | 103   | 21   | 34    | 20   | 80.5  | 20    |
| 3933 | 64    | 40   | 29   | 52    | 27   | 41    | 22   | 55    | 36    |
| 3934 | 58    | 41   | 32   | 51    | 33   | 39    | 19   | 143.5 | 53    |
| 3935 | 22    | 14   | 9    | 20    | 30   | 14    | 7    | 22.5  | 6     |
| 3936 | 22    | 14.5 | 12   | 26    | 18   | 16    | 8    | 33    | 4     |
| 3937 | 23    | 16   | 11   | 27    | 17   | 18.5  | 9    | 36    | 6     |
| 3938 | 18    | 16   | 15   | 17.5  | 15   | 18    | 8    | 27.5  | 13    |
| 3939 | 25    | 18   | 15   | 20    | 15   | 21    | 10   | 31    | 4     |
| 3940 | 21    | 16   | 11   | 24    | 16   | 19    | 9    | 37.5  | 3     |
| 3941 | 61.5  | 20   | 29   | 31    | 27   | 21    | 24   | 169.5 | 30    |
| 3942 | 33    | 15   | 13   | 42    | 27   | 17    | 9    | 44    | 10    |
| 3943 | 26    | 15   | 17.5 | 30    | 15   | 15    | 9    | 48    | 29    |
| 3944 | 56    | 50   | 95   | 172   | 58.5 | 50    | 71   | 605   | 19    |
| 3945 | 50    | 16   | 30   | 27    | 21   | 19    | 41   | 47    | 14    |
| 3946 | 31.5  | 21   | 19   | 33    | 31   | 21    | 14   | 47    | 19    |

|      |      |      |      |       |      |      |      |       |      |
|------|------|------|------|-------|------|------|------|-------|------|
| 3947 | 14   | 8    | 6    | 10    | 12   | 9    | 6    | 15    | 4    |
| 3948 | 17   | 12   | 9    | 13    | 15.5 | 12   | 7    | 19    | 3    |
| 3949 | 20   | 12   | 7    | 13    | 20   | 14   | 7    | 19    | 3    |
| 3950 | 22   | 20   | 16   | 31    | 22   | 19   | 14   | 92.5  | 17   |
| 3951 | 18   | 13   | 13   | 17    | 13   | 14   | 9    | 29    | 6    |
| 3952 | 21   | 15   | 13.5 | 23    | 18   | 16   | 10   | 44    | 4    |
| 3953 | 88   | 31   | 32   | 110   | 80   | 30   | 56   | 135   | 24   |
| 3954 | 23   | 15   | 23   | 34.5  | 25   | 17   | 15   | 38    | 6    |
| 3955 | 16   | 10   | 17.5 | 24.5  | 31   | 10   | 11   | 89    | 5    |
| 3956 | 24   | 11   | 10   | 16    | 35.5 | 11   | 8.5  | 24    | 3    |
| 3957 | 19   | 12   | 8    | 17    | 13.5 | 14   | 21   | 18    | 2    |
| 3958 | 38   | 18   | 16   | 30    | 35.5 | 18   | 33   | 36.5  | 24   |
| 3959 | 34   | 24   | 26   | 46    | 38   | 21   | 19   | 130   | 146  |
| 3960 | 46.5 | 22   | 29   | 110   | 23   | 26   | 13   | 98.5  | 9    |
| 3961 | 62   | 25   | 20.5 | 80    | 21   | 34   | 20   | 208.5 | 16   |
| 3962 | 18.5 | 8    | 9    | 29    | 13   | 8    | 6    | 23    | 52   |
| 3963 | 27   | 20   | 29   | 73    | 31   | 19   | 17   | 186.5 | 5    |
| 3964 | 21   | 12   | 11.5 | 35    | 15   | 14   | 7    | 34    | 13   |
| 3965 | 21   | 13   | 10   | 43    | 15   | 15   | 8    | 34.5  | 12   |
| 3966 | 33   | 17   | 30   | 39    | 32   | 16   | 59   | 58.5  | 18   |
| 3967 | 26   | 15.5 | 12   | 24    | 15   | 16   | 8    | 28    | 27   |
| 3968 | 25   | 15   | 12   | 38    | 17   | 17   | 9    | 41    | 15   |
| 3969 | 28.5 | 19   | 10   | 47    | 15   | 22   | 8    | 41    | 13   |
| 3970 | 72   | 37   | 48.5 | 67    | 34   | 43   | 14   | 82    | 61   |
| 3971 | 129  | 62   | 40.5 | 216.5 | 59   | 85.5 | 40   | 711   | 62   |
| 3972 | 105  | 8.5  | 8    | 63.5  | 13   | 8    | 12   | 39    | 82   |
| 3973 | 23   | 8    | 32.5 | 31    | 12   | 10   | 8    | 23    | 9    |
| 3974 | 30   | 10   | 7    | 34.5  | 23   | 12   | 6.5  | 33    | 8    |
| 3975 | 25   | 11   | 8    | 34.5  | 16   | 13   | 8    | 28    | 37   |
| 3976 | 22   | 13   | 11   | 36    | 16   | 13   | 9    | 38    | 38   |
| 3977 | 31   | 14   | 9    | 35.5  | 16   | 16.5 | 8    | 32    | 36   |
| 3978 | 28.5 | 17   | 12   | 45    | 44   | 19   | 10   | 36    | 18   |
| 3979 | 47   | 17   | 13   | 40.5  | 17   | 20   | 8    | 41    | 11   |
| 3980 | 30   | 20   | 29.5 | 38    | 30.5 | 19.5 | 17   | 235   | 8    |
| 3981 | 26   | 12   | 21   | 31    | 29   | 13   | 9    | 96.5  | 13   |
| 3982 | 19   | 9    | 8    | 15    | 12   | 8    | 7    | 26.5  | 72   |
| 3983 | 50   | 18   | 19.5 | 22    | 15   | 16   | 8    | 34    | 36   |
| 3984 | 32   | 19   | 13   | 47    | 55   | 17   | 12   | 40.5  | 38   |
| 3985 | 23   | 12.5 | 20   | 29    | 36   | 12   | 15.5 | 47    | 76   |
| 3986 | 87   | 46   | 16   | 62.5  | 26   | 21   | 16   | 58.5  | 52   |
| 3987 | 31   | 18.5 | 20   | 58.5  | 24   | 20   | 13   | 51.5  | 22   |
| 3988 | 17   | 9    | 10.5 | 26    | 86   | 7    | 8    | 29    | 85.5 |
| 3989 | 39   | 12   | 12   | 27    | 15   | 12   | 9    | 57.5  | 29   |
| 3990 | 28   | 11   | 21.5 | 20    | 16   | 9    | 12.5 | 35.5  | 8    |
| 3991 | 19.5 | 11.5 | 16   | 28    | 12   | 13.5 | 8    | 50.5  | 3    |
| 3992 | 31   | 20   | 14   | 35.5  | 19   | 19   | 11   | 36    | 25   |
| 3993 | 132  | 103  | 55   | 93    | 42.5 | 105  | 43   | 124   | 95   |

|      |      |       |      |       |      |      |      |       |       |
|------|------|-------|------|-------|------|------|------|-------|-------|
| 3994 | 21   | 13.5  | 15.5 | 27    | 14   | 14   | 9    | 48.5  | 25    |
| 3995 | 43   | 29    | 17   | 46    | 19   | 27   | 14   | 45    | 27    |
| 3996 | 26   | 10    | 8    | 22    | 22   | 10   | 7    | 20.5  | 25    |
| 3997 | 41   | 27    | 15   | 36    | 20.5 | 26   | 13   | 46    | 24    |
| 3998 | 86   | 70    | 36   | 70    | 41   | 68   | 32   | 110   | 60.5  |
| 3999 | 99   | 40    | 18   | 41.5  | 35   | 35   | 17   | 59    | 45    |
| 4000 | 34   | 20.5  | 16.5 | 41    | 24   | 18   | 13   | 50.5  | 16    |
| 4001 | 54   | 37    | 23   | 48    | 31   | 35   | 19   | 60.5  | 31    |
| 4002 | 47   | 28    | 23   | 43    | 22   | 32.5 | 16   | 65.5  | 26    |
| 4003 | 69   | 49    | 30   | 63    | 34   | 49   | 23   | 100   | 51    |
| 4004 | 21   | 9     | 12   | 26    | 16   | 10   | 9    | 40    | 46    |
| 4005 | 42   | 29.5  | 19   | 35    | 24   | 28   | 15   | 44.5  | 34    |
| 4006 | 30   | 16.5  | 14   | 30    | 19   | 17   | 9    | 38    | 14    |
| 4007 | 23   | 12    | 10   | 40.5  | 28   | 12   | 8    | 26.5  | 40    |
| 4008 | 56   | 37.5  | 34   | 84    | 37   | 40   | 23   | 210.5 | 33    |
| 4009 | 58   | 45    | 29   | 50    | 31.5 | 45   | 24   | 96    | 41    |
| 4010 | 61   | 40    | 23   | 49    | 23   | 43   | 18   | 61.5  | 59    |
| 4011 | 30   | 18    | 11   | 29    | 14   | 18   | 10   | 24    | 28    |
| 4012 | 43   | 16    | 11   | 22    | 15   | 17.5 | 27   | 24    | 47    |
| 4013 | 62   | 42    | 21   | 38    | 22   | 39   | 18   | 42    | 44    |
| 4014 | 25   | 13    | 15.5 | 29    | 15   | 14   | 12   | 32    | 13    |
| 4015 | 24.5 | 15    | 9.5  | 27    | 31   | 15   | 9    | 25.5  | 15    |
| 4016 | 42   | 27.5  | 17   | 32.5  | 21   | 25   | 14   | 43    | 46    |
| 4017 | 107  | 73    | 51   | 76    | 40   | 69   | 35   | 153.5 | 58    |
| 4018 | 28   | 20    | 13   | 32    | 17   | 17   | 10   | 46.5  | 21    |
| 4019 | 70   | 53    | 32   | 55    | 33   | 54   | 26   | 88.5  | 72    |
| 4020 | 46   | 29.5  | 17   | 30    | 21   | 30.5 | 13   | 43    | 30    |
| 4021 | 20   | 11    | 10   | 32    | 13   | 9    | 7    | 32    | 26.5  |
| 4022 | 22   | 12    | 9    | 26    | 17   | 11   | 9    | 33.5  | 67    |
| 4023 | 81.5 | 72.5  | 50   | 82    | 41   | 66   | 35   | 242.5 | 63    |
| 4024 | 45.5 | 25.5  | 19   | 45    | 24   | 25   | 14   | 50.5  | 38    |
| 4025 | 19   | 10    | 8    | 13    | 11   | 8    | 9    | 22    | 2     |
| 4026 | 47   | 31.5  | 16   | 33    | 32   | 28.5 | 13   | 40    | 33    |
| 4027 | 74   | 59    | 39   | 63    | 40   | 59   | 31   | 119.5 | 54    |
| 4028 | 53   | 29    | 20   | 40    | 22   | 26   | 14   | 59    | 45    |
| 4029 | 68   | 47    | 23.5 | 59.5  | 26   | 48   | 19   | 64    | 50    |
| 4030 | 31   | 15    | 17   | 50    | 23   | 14   | 12   | 89.5  | 14    |
| 4031 | 30   | 19    | 19   | 32.5  | 17   | 18   | 10   | 36    | 18    |
| 4032 | 26   | 11    | 8    | 30.5  | 13   | 10   | 7    | 26    | 32    |
| 4033 | 32   | 19    | 13   | 38.5  | 28   | 19   | 10   | 43    | 23    |
| 4034 | 30   | 19    | 14   | 35    | 18   | 19   | 14   | 48    | 33    |
| 4035 | 137  | 146.5 | 96.5 | 132.5 | 84   | 123  | 82.5 | 298   | 124.5 |
| 4036 | 33   | 20    | 16   | 36    | 21   | 20   | 12   | 48    | 17    |
| 4037 | 32   | 24    | 12   | 39    | 16   | 24   | 10   | 34    | 67    |
| 4038 | 43   | 31    | 22   | 43    | 32   | 28   | 15   | 58.5  | 54    |
| 4039 | 81   | 54    | 29   | 48    | 24   | 48.5 | 20   | 61    | 48    |
| 4040 | 43   | 32    | 17   | 39    | 18   | 31   | 13   | 49.5  | 73.5  |



|      |      |      |      |      |      |      |      |       |      |
|------|------|------|------|------|------|------|------|-------|------|
| 4041 | 24.5 | 13   | 12   | 28.5 | 20   | 11   | 8    | 58    | 37   |
| 4042 | 43   | 37   | 25   | 58   | 25   | 31   | 18   | 69.5  | 22   |
| 4043 | 60   | 49   | 27   | 48   | 24   | 48.5 | 21   | 63    | 51   |
| 4044 | 86.5 | 68   | 34   | 61   | 36   | 67   | 29.5 | 101   | 62   |
| 4045 | 49   | 43   | 31.5 | 51   | 30   | 41.5 | 26   | 128   | 32   |
| 4046 | 41   | 44   | 53   | 80   | 50   | 41   | 50.5 | 445   | 101  |
| 4047 | 19   | 10   | 24   | 22   | 19   | 9    | 13   | 82    | 5    |
| 4048 | 31   | 24   | 31   | 53   | 65   | 23   | 22   | 284   | 9    |
| 4049 | 15   | 8    | 6    | 12   | 12   | 6    | 6    | 12    | 4    |
| 4050 | 55   | 10   | 8    | 23   | 27   | 10   | 22.5 | 20    | 3    |
| 4051 | 21.5 | 11   | 15   | 20   | 13   | 10   | 7    | 32    | 5    |
| 4052 | 27   | 20   | 13   | 37   | 39   | 14   | 12   | 80    | 6    |
| 4053 | 17.5 | 12   | 11   | 19   | 11   | 13   | 9    | 21    | 5    |
| 4054 | 22   | 11   | 8    | 17   | 63   | 11   | 11   | 19    | 6    |
| 4055 | 26   | 16   | 9    | 26   | 12   | 17   | 9    | 24    | 28   |
| 4056 | 19   | 14.5 | 9    | 14   | 15   | 17   | 7    | 20    | 2    |
| 4057 | 23   | 19   | 12   | 28.5 | 36   | 19   | 25   | 100   | 4    |
| 4058 | 16   | 11   | 7.5  | 19   | 13   | 14   | 9    | 18    | 2    |
| 4059 | 103  | 48   | 68   | 149  | 74   | 47   | 15   | 99    | 48   |
| 4060 | 36   | 23   | 17   | 32   | 24   | 25   | 12   | 49    | 36   |
| 4061 | 24   | 16   | 12.5 | 33.5 | 16   | 17   | 9    | 26    | 17   |
| 4062 | 51.5 | 43   | 26   | 49   | 31   | 42   | 24.5 | 73    | 37   |
| 4063 | 27   | 15   | 10.5 | 24.5 | 44   | 18   | 9    | 34    | 18   |
| 4064 | 47   | 35.5 | 18.5 | 47   | 24   | 38   | 15   | 58    | 47   |
| 4065 | 37   | 27   | 21   | 44   | 36   | 28   | 14   | 72    | 36   |
| 4066 | 33   | 21   | 12   | 25   | 21   | 25   | 10   | 44    | 28   |
| 4067 | 29   | 23   | 14   | 28   | 21   | 20   | 13   | 54.5  | 20.5 |
| 4068 | 19.5 | 11   | 14.5 | 23.5 | 15   | 14   | 11   | 30    | 9    |
| 4069 | 24   | 14   | 9    | 22   | 17   | 15   | 6    | 27    | 49   |
| 4070 | 52   | 40   | 21   | 45   | 27   | 37   | 22   | 75    | 41   |
| 4071 | 74   | 55   | 27   | 59.5 | 29   | 54   | 91   | 63    | 86   |
| 4072 | 61.5 | 50.5 | 31   | 50.5 | 33   | 51   | 23   | 104.5 | 125  |
| 4073 | 26   | 19   | 13   | 32   | 21   | 18   | 9    | 47    | 28   |
| 4074 | 39   | 28   | 16   | 38   | 27   | 28   | 17   | 108   | 44   |
| 4075 | 55   | 36   | 19   | 48   | 27   | 40   | 26   | 56.5  | 47.5 |
| 4076 | 53   | 40   | 23   | 44   | 32   | 43   | 18   | 56    | 39   |
| 4077 | 35   | 26   | 22   | 37.5 | 25   | 29   | 13   | 44    | 37   |
| 4078 | 48   | 17   | 13   | 29   | 16.5 | 17   | 10   | 61    | 30   |
| 4079 | 41   | 34   | 22   | 36   | 28   | 34   | 16   | 72.5  | 42   |
| 4080 | 22   | 12   | 10   | 26.5 | 18   | 12   | 10   | 32    | 75.5 |
| 4081 | 52   | 40   | 20   | 44   | 23   | 37   | 18   | 58    | 32   |
| 4082 | 16   | 12   | 9    | 19   | 10   | 11   | 8    | 25    | 4    |
| 4083 | 15.5 | 9    | 8    | 15   | 11   | 13   | 7    | 20    | 4    |
| 4084 | 23   | 20   | 16   | 23   | 18.5 | 16   | 13   | 27    | 9    |
| 4085 | 16   | 11   | 10.5 | 14   | 13   | 13   | 7    | 17    | 3    |
| 4086 | 41   | 23.5 | 34   | 52   | 55   | 29   | 23   | 260   | 8    |
| 4087 | 14   | 11   | 6    | 9    | 6    | 11.5 | 5    | 13    | 2    |

|      |       |       |      |      |      |      |      |      |      |
|------|-------|-------|------|------|------|------|------|------|------|
| 4088 | 19    | 13    | 8    | 11   | 13   | 15   | 7    | 16   | 4    |
| 4089 | 11    | 12    | 6    | 10   | 8    | 11   | 6    | 14.5 | 3    |
| 4090 | 22    | 12    | 7    | 17   | 26   | 12   | 7    | 19.5 | 18   |
| 4091 | 18    | 18    | 16   | 20   | 22   | 17   | 10   | 41   | 10   |
| 4092 | 25    | 17    | 16   | 23   | 15   | 17   | 10   | 46   | 15   |
| 4093 | 33    | 26    | 26   | 77.5 | 28   | 25   | 16   | 256  | 18   |
| 4094 | 16    | 11    | 9    | 23   | 11   | 13   | 12   | 25   | 5    |
| 4095 | 18    | 13    | 9    | 26   | 15   | 14   | 26   | 27   | 14   |
| 4096 | 86.5  | 69.5  | 33.5 | 60   | 35.5 | 70   | 28   | 103  | 68   |
| 4097 | 69    | 50    | 22   | 45   | 28   | 51   | 38   | 52   | 43   |
| 4098 | 54    | 37    | 20   | 43   | 29   | 41   | 22   | 49   | 39   |
| 4099 | 110.5 | 68    | 37   | 66   | 36   | 74   | 28.5 | 89   | 69   |
| 4100 | 44    | 28    | 14   | 46   | 24   | 32   | 15   | 46   | 16   |
| 4101 | 53    | 42    | 21   | 48.5 | 27.5 | 41   | 21   | 45.5 | 51   |
| 4102 | 99    | 33    | 17.5 | 38.5 | 27   | 31   | 20   | 38   | 21.5 |
| 4103 | 83    | 70    | 30   | 64   | 141  | 72   | 35   | 90   | 66   |
| 4104 | 83    | 59    | 25   | 57   | 32   | 64   | 29   | 62   | 48   |
| 4105 | 198   | 186.5 | 63   | 96   | 64   | 177  | 51   | 158  | 172  |
| 4106 | 119.5 | 90    | 37   | 82   | 42   | 96   | 27.5 | 86.5 | 65   |
| 4107 | 68    | 43.5  | 25   | 46   | 32   | 48   | 19   | 58   | 36   |
| 4108 | 107   | 91    | 55.5 | 93   | 74   | 91   | 49   | 102  | 83   |
| 4109 | 82    | 53    | 23   | 43   | 35.5 | 58   | 22   | 56   | 46   |
| 4110 | 100.5 | 90    | 41   | 77   | 65   | 87   | 35   | 87   | 87   |
| 4111 | 51    | 37    | 19   | 40   | 44   | 40   | 16   | 51   | 36   |
| 4112 | 77    | 64    | 27   | 52   | 38   | 62   | 26   | 68   | 71   |
| 4113 | 75    | 56    | 35   | 53   | 45   | 60   | 22   | 73   | 52   |
| 4114 | 72    | 63    | 31   | 66   | 32.5 | 63   | 27   | 102  | 62   |
| 4115 | 56    | 45.5  | 19   | 69   | 27   | 49   | 16   | 62.5 | 31   |
| 4116 | 71    | 61    | 28   | 54   | 31   | 62   | 24   | 86.5 | 51   |
| 4117 | 154   | 105   | 45   | 79   | 58   | 107  | 42   | 108  | 89   |
| 4118 | 57    | 43    | 23   | 43   | 27.5 | 44   | 18   | 50.5 | 45   |
| 4119 | 81.5  | 72    | 32   | 54   | 35   | 73.5 | 26   | 70   | 59   |
| 4120 | 37    | 23    | 12.5 | 40   | 18   | 27   | 10   | 50   | 15   |
| 4121 | 33    | 23    | 21   | 42   | 21   | 26   | 11   | 42.5 | 19   |
| 4122 | 68    | 52.5  | 33   | 50   | 30   | 60   | 24   | 60   | 50   |
| 4123 | 44    | 28    | 16   | 42   | 23   | 31   | 24   | 41   | 20   |
| 4124 | 81    | 60    | 31.5 | 55   | 35   | 64   | 24   | 78   | 51.5 |
| 4125 | 111   | 99    | 50   | 74   | 56   | 93   | 39   | 92.5 | 72.5 |
| 4126 | 103   | 82.5  | 44   | 77   | 44   | 85   | 37   | 99.5 | 74   |
| 4127 | 79    | 67    | 34   | 59   | 30   | 71   | 27   | 78.5 | 58   |
| 4128 | 74    | 55    | 33   | 55   | 49   | 59   | 26   | 69.5 | 59   |
| 4129 | 112.5 | 78    | 37   | 70   | 43.5 | 77   | 34   | 99   | 68   |
| 4130 | 140   | 116   | 61   | 85   | 51   | 119  | 48   | 130  | 140  |
| 4131 | 49    | 37    | 19   | 44   | 27   | 35   | 15   | 48   | 32   |
| 4132 | 39    | 17    | 9    | 26   | 23   | 21.5 | 9    | 33   | 32   |
| 4133 | 39    | 29    | 17   | 40   | 20   | 30   | 12   | 43   | 42.5 |
| 4134 | 29    | 16.5  | 15   | 28   | 46   | 19   | 8    | 38.5 | 22   |

|      |       |      |      |      |      |      |       |        |      |
|------|-------|------|------|------|------|------|-------|--------|------|
| 4135 | 19    | 15.5 | 7    | 10   | 11   | 15   | 7     | 15.5   | 6    |
| 4136 | 18    | 17   | 7.5  | 14   | 27   | 16   | 6     | 27     | 13   |
| 4137 | 18    | 14   | 7    | 10   | 12   | 16   | 6     | 18     | 2    |
| 4138 | 24.5  | 19   | 17   | 24   | 24   | 19   | 15    | 39.5   | 13   |
| 4139 | 48.5  | 30   | 64   | 31   | 44   | 21   | 9     | 61.5   | 10   |
| 4140 | 25    | 15   | 8    | 18   | 18   | 20   | 7     | 21     | 12   |
| 4141 | 24    | 14   | 9    | 18   | 14   | 16   | 7     | 23.5   | 5    |
| 4142 | 29    | 16   | 11   | 22   | 14   | 18   | 8     | 24     | 21   |
| 4143 | 26    | 17.5 | 61   | 19   | 30   | 20   | 9     | 53.5   | 39   |
| 4144 | 20    | 11   | 7    | 8    | 20   | 16   | 6.5   | 15     | 3    |
| 4145 | 26    | 16   | 22   | 27   | 36   | 19   | 11    | 25     | 72   |
| 4146 | 30.5  | 15   | 8    | 14   | 20.5 | 18   | 8     | 22     | 7    |
| 4147 | 38    | 19   | 12.5 | 39   | 33   | 20   | 15    | 42     | 15   |
| 4148 | 47    | 21   | 21   | 43   | 35   | 21   | 42    | 39     | 19   |
| 4149 | 35    | 22   | 12   | 40   | 13   | 20   | 8.5   | 36     | 10   |
| 4150 | 32    | 16   | 9    | 29   | 11   | 18   | 7     | 29.5   | 66.5 |
| 4151 | 26    | 14   | 8    | 27   | 13   | 17   | 7     | 26     | 53   |
| 4152 | 30    | 12   | 10   | 21   | 13   | 14   | 7     | 21.5   | 60   |
| 4153 | 26    | 51   | 11   | 20   | 11   | 18   | 8     | 21     | 32   |
| 4154 | 30    | 22   | 9    | 30   | 14   | 20   | 10    | 23     | 30   |
| 4155 | 25    | 16   | 13   | 35   | 16   | 18   | 11    | 80.5   | 24   |
| 4156 | 32    | 24   | 12   | 33   | 27   | 16   | 12    | 29     | 46   |
| 4157 | 32    | 14   | 11   | 49   | 19   | 18   | 9     | 41     | 43   |
| 4158 | 34    | 14   | 13   | 28   | 20   | 15   | 10    | 57.5   | 8    |
| 4159 | 50    | 18   | 11   | 20   | 33.5 | 21   | 16    | 91.5   | 13   |
| 4160 | 32    | 18   | 15   | 46   | 24   | 21   | 11.5  | 102    | 6    |
| 4161 | 21    | 16   | 8    | 16   | 27   | 17   | 8     | 36     | 7    |
| 4162 | 29.5  | 17   | 9    | 20   | 18   | 19   | 8     | 36     | 8    |
| 4163 | 22    | 14   | 9.5  | 15   | 19   | 15   | 7     | 25     | 8    |
| 4164 | 19    | 14   | 11.5 | 17   | 19   | 15   | 29    | 23     | 5    |
| 4165 | 18    | 12   | 10   | 13   | 20   | 14   | 7     | 36.5   | 4    |
| 4166 | 22    | 13   | 19.5 | 25   | 17   | 15   | 34.5  | 38     | 3    |
| 4167 | 21    | 13   | 8    | 25   | 16.5 | 16   | 9     | 72     | 11   |
| 4168 | 20    | 13   | 16   | 19   | 17   | 12   | 10    | 21     | 4    |
| 4169 | 53    | 16   | 11   | 19   | 17   | 16   | 21    | 23.5   | 36.5 |
| 4170 | 27    | 15   | 36.5 | 16   | 16   | 14.5 | 11    | 38     | 6    |
| 4171 | 187.5 | 281  | 53.5 | 203  | 47   | 228  | 43    | 5178.5 | 28   |
| 4172 | 85.5  | 27   | 20   | 71.5 | 62   | 22   | 310.5 | 164    | 21   |
| 4173 | 19    | 9    | 8    | 14   | 16   | 9    | 31    | 13     | 3    |
| 4174 | 81    | 97   | 16   | 26   | 187  | 98   | 27    | 1185.5 | 30   |
| 4175 | 21    | 15   | 14   | 27   | 17   | 18   | 13    | 102    | 7    |
| 4176 | 18.5  | 12.5 | 10   | 12   | 19   | 10   | 20    | 17     | 4    |
| 4177 | 18    | 8    | 6    | 16   | 12   | 9    | 5     | 17     | 11   |
| 4178 | 22    | 9    | 10   | 20   | 12.5 | 11   | 9     | 29     | 6    |
| 4179 | 25    | 12   | 14   | 58   | 19   | 16   | 12    | 42     | 10   |
| 4180 | 22    | 14   | 14   | 35   | 18   | 15   | 11    | 25     | 10   |
| 4181 | 16    | 12   | 12   | 17   | 13   | 9    | 7     | 25     | 7    |

|      |      |      |      |      |      |      |      |       |      |
|------|------|------|------|------|------|------|------|-------|------|
| 4182 | 22.5 | 13   | 8    | 26   | 19   | 12   | 9    | 23    | 5    |
| 4183 | 23.5 | 12   | 22   | 19   | 14   | 11   | 9    | 28.5  | 11   |
| 4184 | 22.5 | 13   | 11   | 30   | 18   | 14   | 55   | 87.5  | 7    |
| 4185 | 63   | 20.5 | 15   | 139  | 30   | 29   | 93   | 209.5 | 41   |
| 4186 | 38   | 15   | 20   | 46   | 447  | 13   | 81   | 56    | 57   |
| 4187 | 29   | 10   | 10   | 26   | 28   | 12   | 9    | 32    | 35   |
| 4188 | 21   | 11   | 8    | 17   | 16   | 11   | 6    | 21    | 33   |
| 4189 | 14   | 7.5  | 7    | 12   | 13   | 10   | 6    | 18.5  | 2    |
| 4190 | 17   | 9    | 7    | 12   | 28   | 12   | 9    | 14    | 1.5  |
| 4191 | 28   | 13   | 58   | 35.5 | 15   | 14   | 15.5 | 37.5  | 36   |
| 4192 | 22   | 12   | 9    | 12   | 20   | 11   | 8    | 30    | 5    |
| 4193 | 17   | 12   | 10.5 | 18   | 17   | 10   | 13   | 32    | 29   |
| 4194 | 21   | 12   | 11   | 31   | 14   | 15   | 10   | 102.5 | 6    |
| 4195 | 29   | 13   | 11   | 20   | 31   | 16   | 9    | 60    | 4    |
| 4196 | 91   | 13   | 14   | 41   | 29   | 12.5 | 30   | 43    | 41   |
| 4197 | 38   | 11   | 9    | 42   | 24   | 12   | 10   | 37.5  | 61   |
| 4198 | 21   | 15   | 74   | 24   | 13   | 14   | 11   | 92    | 6    |
| 4199 | 17   | 11   | 8    | 15   | 29   | 11   | 9    | 34    | 4    |
| 4200 | 25   | 12   | 9.5  | 23   | 283  | 14   | 8    | 73.5  | 8    |
| 4201 | 89   | 67   | 30   | 66   | 34   | 71   | 24   | 81.5  | 91   |
| 4202 | 25   | 17   | 15   | 29   | 14.5 | 18   | 10   | 26    | 21   |
| 4203 | 38   | 16   | 20   | 26   | 17   | 16   | 17   | 34    | 16   |
| 4204 | 21   | 11   | 11   | 34   | 19   | 13   | 12   | 37    | 22   |
| 4205 | 77   | 44.5 | 21   | 45.5 | 29   | 43   | 18   | 50    | 76.5 |
| 4206 | 43   | 32   | 24.5 | 36   | 23   | 30   | 17   | 44    | 47.5 |
| 4207 | 24   | 13.5 | 10   | 21   | 17   | 16   | 9    | 54    | 12.5 |
| 4208 | 26   | 14   | 10   | 33.5 | 17   | 15   | 9    | 29    | 15   |
| 4209 | 34   | 23   | 46   | 37   | 27   | 22   | 27.5 | 93.5  | 28   |
| 4210 | 35   | 12   | 12   | 26   | 14   | 14   | 12   | 27    | 14   |
| 4211 | 22.5 | 10   | 13.5 | 23   | 22   | 10   | 7    | 25    | 22   |
| 4212 | 20   | 11   | 9    | 28   | 12   | 10   | 8    | 23    | 12   |
| 4213 | 23   | 12   | 13   | 20   | 19   | 13   | 8    | 28.5  | 17   |
| 4214 | 22   | 12   | 13   | 37   | 15   | 12   | 8    | 40.5  | 14   |
| 4215 | 26   | 14   | 21   | 28   | 14   | 16   | 7    | 79.5  | 15   |
| 4216 | 35.5 | 17   | 11   | 32   | 74   | 16   | 13   | 31    | 21   |
| 4217 | 20   | 11   | 8    | 22   | 12.5 | 11   | 8    | 23    | 20   |
| 4218 | 18.5 | 7    | 8    | 17   | 12   | 10   | 7    | 20.5  | 21   |
| 4219 | 23   | 19   | 9    | 29   | 11   | 12   | 11   | 30    | 25   |
| 4220 | 37   | 25   | 16   | 36   | 19.5 | 25   | 15.5 | 66.5  | 22.5 |
| 4221 | 28   | 18   | 12.5 | 27   | 18   | 16   | 12   | 31    | 34   |
| 4222 | 29   | 14   | 13   | 32   | 23   | 16   | 11   | 51    | 17   |
| 4223 | 36   | 22   | 11   | 37   | 16   | 22   | 11   | 33    | 17   |
| 4224 | 23   | 11   | 9    | 36.5 | 14   | 12   | 8    | 26    | 13   |
| 4225 | 25   | 11   | 9    | 36   | 17   | 12   | 9    | 29    | 6    |
| 4226 | 38   | 12.5 | 10   | 23   | 15   | 13   | 9    | 27    | 29   |
| 4227 | 65.5 | 43   | 26   | 62   | 25   | 41   | 33   | 59    | 61   |
| 4228 | 25   | 10   | 8    | 22   | 14   | 10   | 10   | 24    | 14   |

|      |      |      |      |      |      |      |      |       |       |
|------|------|------|------|------|------|------|------|-------|-------|
| 4229 | 32   | 16   | 13   | 49   | 16   | 18   | 9    | 35    | 25    |
| 4230 | 115  | 18   | 13   | 27   | 26   | 18   | 10   | 26    | 16    |
| 4231 | 21   | 10   | 9    | 24   | 27   | 10   | 8    | 23    | 13    |
| 4232 | 56   | 27   | 14   | 31   | 24   | 25   | 15   | 39    | 37    |
| 4233 | 23.5 | 12   | 9    | 32   | 16   | 13   | 7    | 34.5  | 9     |
| 4234 | 31.5 | 15   | 12   | 26   | 14   | 13   | 8    | 26    | 15    |
| 4235 | 54   | 31   | 17   | 37   | 22   | 27   | 13   | 34.5  | 31    |
| 4236 | 75   | 48   | 32   | 55   | 27.5 | 57   | 28   | 66.5  | 53    |
| 4237 | 63   | 37   | 20   | 41   | 23   | 39   | 18   | 48    | 49    |
| 4238 | 32.5 | 11   | 14   | 22   | 15   | 12   | 7    | 47.5  | 24    |
| 4239 | 18   | 9    | 8    | 18   | 13   | 9    | 7    | 21    | 4     |
| 4240 | 33   | 10   | 9    | 21   | 62   | 12   | 10   | 25    | 11    |
| 4241 | 23   | 10   | 8    | 16   | 16   | 10   | 7    | 22.5  | 3     |
| 4242 | 19   | 10   | 8    | 20.5 | 85.5 | 12   | 9    | 54    | 5     |
| 4243 | 33   | 17   | 20   | 38.5 | 56   | 24.5 | 24   | 212.5 | 38    |
| 4244 | 36   | 11   | 9    | 45   | 14.5 | 13   | 8    | 54    | 5     |
| 4245 | 41   | 11   | 16   | 62.5 | 73   | 12   | 24   | 31    | 54.5  |
| 4246 | 24   | 11   | 11   | 22   | 18   | 12   | 12.5 | 59    | 7     |
| 4247 | 17   | 8.5  | 9    | 15   | 11   | 10   | 7    | 26    | 10    |
| 4248 | 33   | 11   | 11   | 41.5 | 16.5 | 13   | 8    | 59    | 4     |
| 4249 | 35   | 11   | 15   | 62.5 | 75   | 11   | 21.5 | 34.5  | 43.5  |
| 4250 | 22   | 12   | 11   | 21   | 15   | 10   | 11   | 40    | 6     |
| 4251 | 25   | 12   | 16   | 45.5 | 50   | 12   | 9    | 36    | 36    |
| 4252 | 23   | 12   | 11   | 33.5 | 16   | 12.5 | 8    | 29    | 7     |
| 4253 | 49   | 23.5 | 23   | 29   | 26   | 27   | 41.5 | 136   | 16    |
| 4254 | 33   | 26   | 15   | 22   | 20   | 30   | 10   | 29    | 8     |
| 4255 | 38   | 11   | 8.5  | 17   | 24   | 11   | 15   | 27.5  | 10    |
| 4256 | 38   | 22   | 10   | 50   | 30   | 23   | 9    | 27    | 28    |
| 4257 | 25   | 19   | 9    | 19   | 14   | 22   | 8    | 14    | 4     |
| 4258 | 39   | 21   | 11   | 46   | 27   | 29   | 9    | 32    | 16    |
| 4259 | 62   | 23   | 14   | 57   | 33   | 26   | 12   | 48.5  | 19    |
| 4260 | 32   | 23   | 9    | 27   | 17   | 30   | 7    | 21    | 6     |
| 4261 | 40   | 24   | 10   | 52   | 27   | 27   | 8    | 29    | 58    |
| 4262 | 109  | 25   | 17.5 | 64.5 | 37   | 27   | 15   | 29    | 346   |
| 4263 | 50   | 27   | 20   | 52.5 | 37   | 30   | 13   | 30    | 203   |
| 4264 | 46.5 | 26   | 16   | 51   | 27   | 25   | 12   | 37.5  | 85    |
| 4265 | 49.5 | 23   | 15   | 49   | 22   | 25   | 11   | 24    | 56    |
| 4266 | 50   | 29   | 19   | 32   | 34   | 45   | 9    | 34    | 12    |
| 4267 | 708  | 377  | 36   | 69   | 63.5 | 1403 | 26   | 79    | 167.5 |
| 4268 | 96   | 25.5 | 30   | 46   | 32.5 | 31   | 23   | 27.5  | 42    |
| 4269 | 40   | 22   | 11   | 60   | 63.5 | 27   | 10   | 29.5  | 150   |
| 4270 | 32   | 17   | 7    | 22   | 26   | 21   | 7    | 16    | 11    |
| 4271 | 33   | 16.5 | 14   | 34   | 38   | 21   | 12   | 24    | 14    |
| 4272 | 36   | 17   | 9    | 61   | 17   | 21   | 14   | 25    | 27    |
| 4273 | 41   | 22   | 18   | 38.5 | 19   | 25   | 10   | 17    | 31    |
| 4274 | 35   | 22   | 10   | 41.5 | 18   | 26   | 14   | 25    | 10    |
| 4275 | 28   | 18   | 9.5  | 36   | 32   | 24   | 8    | 50.5  | 16    |

|      |      |      |      |      |       |      |      |       |      |
|------|------|------|------|------|-------|------|------|-------|------|
| 4276 | 28   | 17   | 8    | 31   | 15    | 21   | 7    | 23    | 15   |
| 4277 | 76   | 61   | 36   | 48.5 | 26    | 63   | 23   | 80    | 59.5 |
| 4278 | 67.5 | 52.5 | 22   | 51   | 30    | 52   | 17   | 93.5  | 45   |
| 4279 | 52   | 35   | 21   | 41   | 21    | 39   | 14   | 69    | 27   |
| 4280 | 46   | 36   | 19   | 42   | 23    | 39.5 | 13   | 54.5  | 28   |
| 4281 | 85   | 53   | 32   | 63   | 39    | 59   | 26   | 70.5  | 58   |
| 4282 | 71.5 | 52.5 | 30   | 67.5 | 31    | 56   | 18   | 71.5  | 54   |
| 4283 | 41   | 27.5 | 21   | 44.5 | 19    | 32   | 11   | 120.5 | 21   |
| 4284 | 198  | 179  | 77   | 126  | 215.5 | 179  | 52   | 191   | 166  |
| 4285 | 54   | 42   | 18   | 49   | 63    | 43   | 13   | 68    | 61   |
| 4286 | 29   | 19   | 22   | 29   | 13    | 20.5 | 8    | 68    | 25   |
| 4287 | 26   | 12   | 10   | 24   | 18    | 12   | 6    | 37.5  | 20   |
| 4288 | 25   | 15   | 10   | 25   | 35    | 16   | 8    | 44.5  | 12   |
| 4289 | 42   | 25   | 16   | 44   | 22    | 28   | 10   | 57    | 21   |
| 4290 | 65   | 52   | 23   | 55   | 36    | 52   | 18   | 60    | 44.5 |
| 4291 | 63   | 52   | 26   | 50   | 25.5  | 54   | 21   | 59.5  | 68   |
| 4292 | 25   | 17   | 8    | 20   | 8     | 20   | 6    | 23    | 7    |
| 4293 | 45   | 28   | 15   | 35   | 24    | 32   | 10   | 54.5  | 21   |
| 4294 | 42.5 | 25   | 14   | 30   | 41    | 27   | 10   | 47    | 28   |
| 4295 | 25.5 | 14   | 7    | 22   | 16    | 16   | 6    | 25    | 17   |
| 4296 | 44   | 25   | 13   | 35   | 21    | 26   | 10   | 50    | 22   |
| 4297 | 53   | 23   | 16   | 38   | 37    | 27   | 11   | 56.5  | 23   |
| 4298 | 76   | 59   | 33.5 | 53.5 | 29    | 65   | 26   | 85    | 72   |
| 4299 | 50   | 36.5 | 19   | 42   | 23    | 36   | 17   | 61.5  | 36   |
| 4300 | 29   | 20   | 10   | 29   | 15    | 24   | 8    | 37.5  | 42   |
| 4301 | 35.5 | 18   | 12   | 31   | 32    | 21   | 12   | 37.5  | 46   |
| 4302 | 39   | 25   | 9    | 31   | 14    | 29.5 | 8    | 35    | 41   |
| 4303 | 65.5 | 52   | 31   | 52.5 | 30    | 54   | 21   | 76.5  | 82   |
| 4304 | 90.5 | 76   | 37.5 | 72   | 31    | 77   | 32   | 102   | 85   |
| 4305 | 33   | 24   | 17   | 30   | 13    | 26   | 11   | 36    | 35   |
| 4306 | 41   | 14   | 11   | 29   | 11    | 15   | 7    | 37    | 14   |
| 4307 | 39   | 19   | 12   | 30   | 13    | 20   | 12   | 82.5  | 30   |
| 4308 | 50   | 30   | 17   | 41.5 | 26    | 30   | 14   | 32    | 25   |
| 4309 | 28   | 15   | 8    | 25   | 23    | 16   | 6    | 27    | 33   |
| 4310 | 49   | 20.5 | 16   | 60   | 25    | 21   | 11   | 59    | 21   |
| 4311 | 29   | 14   | 12   | 27   | 14    | 15   | 10   | 40    | 19   |
| 4312 | 84   | 62   | 31   | 64   | 35    | 61   | 25.5 | 80    | 54   |
| 4313 | 27.5 | 16   | 13   | 32   | 23    | 19   | 8    | 92    | 18   |
| 4314 | 20   | 11   | 9    | 27   | 10    | 13   | 7.5  | 33.5  | 13   |
| 4315 | 29   | 19   | 10   | 34   | 12.5  | 22   | 7    | 50    | 20.5 |
| 4316 | 43.5 | 31   | 17   | 44.5 | 22    | 32   | 11   | 46    | 36   |
| 4317 | 33   | 23   | 20   | 45   | 39    | 27   | 18   | 316   | 46   |
| 4318 | 25   | 12   | 9.5  | 46   | 15    | 16   | 11   | 62    | 11.5 |
| 4319 | 15   | 9    | 6    | 15   | 6     | 11   | 4    | 13    | 3    |
| 4320 | 11   | 10   | 8.5  | 16   | 8     | 12.5 | 5    | 9     | 7    |
| 4321 | 17   | 9    | 8    | 32   | 8     | 11   | 5    | 22    | 8    |
| 4322 | 20   | 11   | 6    | 42   | 10    | 13   | 8    | 35    | 5    |

|      |       |      |      |      |      |      |      |       |      |
|------|-------|------|------|------|------|------|------|-------|------|
| 4323 | 27    | 16   | 8    | 34   | 9    | 18   | 7    | 24    | 50   |
| 4324 | 23    | 13   | 8    | 41   | 12   | 16   | 13   | 46.5  | 6    |
| 4325 | 88.5  | 23.5 | 21   | 45   | 22   | 27   | 19   | 201   | 19   |
| 4326 | 105   | 13   | 22   | 21   | 19   | 14   | 11   | 79.5  | 10   |
| 4327 | 21.5  | 10.5 | 8.5  | 14   | 380  | 13   | 7    | 25    | 11   |
| 4328 | 20    | 8    | 9    | 23   | 15   | 10   | 7    | 19    | 4    |
| 4329 | 48    | 17   | 26   | 35   | 19   | 17   | 11   | 42    | 24   |
| 4330 | 26    | 12   | 16   | 32   | 14   | 13   | 10   | 69    | 9    |
| 4331 | 36    | 17   | 19   | 29.5 | 113  | 21   | 12   | 237   | 15   |
| 4332 | 24    | 13   | 18   | 57.5 | 21   | 16   | 18   | 30    | 11   |
| 4333 | 17    | 12   | 7    | 18   | 9    | 14   | 6    | 29.5  | 12   |
| 4334 | 28    | 15   | 9    | 29   | 9    | 16   | 7    | 27    | 29   |
| 4335 | 40    | 7    | 9    | 23   | 18   | 9    | 14   | 52.5  | 4    |
| 4336 | 27    | 12   | 8    | 15   | 9    | 13   | 9    | 23    | 7    |
| 4337 | 207.5 | 17   | 17   | 38   | 53   | 18   | 44   | 27    | 17   |
| 4338 | 32    | 14   | 13   | 33   | 88   | 18   | 11   | 195   | 6    |
| 4339 | 39    | 12   | 13.5 | 36   | 20   | 13   | 9    | 45    | 10   |
| 4340 | 48    | 24   | 16.5 | 41   | 17   | 24   | 13   | 94.5  | 54   |
| 4341 | 31    | 24   | 18   | 23   | 33   | 16   | 14   | 61    | 18   |
| 4342 | 22.5  | 13   | 10   | 25.5 | 60   | 14   | 14   | 22    | 35   |
| 4343 | 47    | 12   | 9    | 22.5 | 14   | 12.5 | 42   | 48    | 7    |
| 4344 | 53.5  | 16.5 | 23.5 | 55.5 | 17   | 17   | 28.5 | 161   | 6    |
| 4345 | 71    | 45   | 23   | 65   | 32   | 47   | 16   | 64.5  | 42.5 |
| 4346 | 31    | 15   | 8    | 32   | 17   | 17   | 8    | 29    | 22   |
| 4347 | 48    | 38   | 16   | 33   | 18   | 37   | 12   | 41.5  | 32   |
| 4348 | 89    | 66   | 32   | 63   | 29.5 | 62   | 19   | 92.5  | 86   |
| 4349 | 69    | 36   | 16   | 42   | 27   | 35   | 12.5 | 42.5  | 32   |
| 4350 | 35    | 22.5 | 14.5 | 33.5 | 12   | 20.5 | 8    | 32    | 27   |
| 4351 | 65    | 45   | 21   | 51   | 24   | 47   | 18   | 60    | 52   |
| 4352 | 105.5 | 62   | 27   | 61   | 28   | 63   | 20   | 71    | 58   |
| 4353 | 76    | 63   | 30   | 58   | 31   | 61   | 23   | 70    | 68   |
| 4354 | 74    | 57   | 25   | 57   | 27   | 55   | 21   | 66    | 45   |
| 4355 | 95    | 69   | 29   | 58.5 | 33   | 70   | 26.5 | 76.5  | 58   |
| 4356 | 72    | 53   | 21   | 52   | 30   | 58   | 19   | 61    | 54.5 |
| 4357 | 43    | 15   | 23   | 60.5 | 23   | 17   | 13   | 64    | 54   |
| 4358 | 19    | 8    | 8    | 16   | 42   | 9.5  | 6    | 20    | 3    |
| 4359 | 22    | 9    | 9    | 39   | 17   | 10   | 10   | 30    | 30   |
| 4360 | 26    | 9    | 7    | 33   | 7    | 10   | 6    | 20.5  | 8    |
| 4361 | 28    | 13   | 11   | 31   | 29   | 12   | 8    | 34.5  | 22   |
| 4362 | 19    | 10   | 8    | 26   | 7    | 13   | 8    | 55    | 162  |
| 4363 | 17    | 10   | 9    | 22.5 | 10   | 10   | 6    | 71    | 5    |
| 4364 | 25    | 13   | 52.5 | 26   | 32   | 14   | 21   | 241.5 | 6    |
| 4365 | 10    | 6    | 5    | 10   | 6    | 6    | 5    | 13    | 2    |
| 4366 | 11    | 7    | 5    | 8    | 6    | 9    | 5    | 11    | 4    |
| 4367 | 13    | 9    | 8    | 17   | 8    | 9    | 7    | 40    | 2    |
| 4368 | 16    | 12   | 18   | 23   | 26.5 | 13   | 10   | 207   | 10   |
| 4369 | 12    | 8    | 7    | 9.5  | 9    | 7    | 5    | 30    | 3    |

|      |      |      |      |      |      |      |      |      |      |
|------|------|------|------|------|------|------|------|------|------|
| 4370 | 25   | 9    | 9    | 33   | 11   | 9    | 7    | 21   | 9    |
| 4371 | 59   | 9    | 9    | 33.5 | 15   | 10   | 8    | 34.5 | 81   |
| 4372 | 26   | 8    | 7    | 10   | 8    | 7    | 6.5  | 13.5 | 9    |
| 4373 | 97   | 30   | 80   | 45.5 | 17   | 30   | 15   | 179  | 11.5 |
| 4374 | 22   | 11   | 9    | 14   | 13   | 10   | 7    | 24   | 3    |
| 4375 | 43   | 19   | 11   | 51   | 908  | 14.5 | 9.5  | 44   | 75.5 |
| 4376 | 14   | 5    | 6    | 14   | 8    | 6    | 5    | 18   | 4    |
| 4377 | 55   | 37   | 18   | 38.5 | 31   | 37   | 19   | 41.5 | 72   |
| 4378 | 35   | 25   | 18   | 39   | 16   | 28   | 12   | 37   | 42   |
| 4379 | 54   | 40   | 22   | 41   | 28   | 39   | 17   | 55   | 52   |
| 4380 | 30   | 8    | 8    | 20   | 11   | 9    | 7    | 25   | 19   |
| 4381 | 68   | 57   | 36   | 50.5 | 32   | 58   | 24   | 65   | 54.5 |
| 4382 | 33   | 13   | 12   | 27   | 18   | 12.5 | 10   | 28   | 27   |
| 4383 | 37   | 30   | 17   | 33   | 18   | 32   | 17.5 | 49   | 39   |
| 4384 | 44   | 33   | 19   | 38.5 | 19   | 31   | 15   | 40.5 | 37   |
| 4385 | 18   | 9    | 13.5 | 21.5 | 11   | 10   | 7.5  | 31   | 17   |
| 4386 | 46   | 30   | 25.5 | 51   | 22   | 33   | 19   | 54.5 | 47   |
| 4387 | 63   | 51   | 29   | 46   | 30   | 51   | 24   | 86   | 55   |
| 4388 | 23   | 8    | 10   | 19   | 16   | 9    | 8    | 26   | 33   |
| 4389 | 29.5 | 11   | 14   | 28.5 | 15   | 14   | 9.5  | 33   | 20   |
| 4390 | 19   | 8    | 8    | 22.5 | 8    | 8    | 6    | 20   | 24   |
| 4391 | 16   | 8    | 7    | 25.5 | 10   | 8    | 5    | 18   | 12   |
| 4392 | 19   | 7    | 7    | 21.5 | 8    | 6    | 5    | 22   | 17   |
| 4393 | 31   | 18.5 | 10   | 35   | 15   | 17   | 9    | 30   | 17   |
| 4394 | 17.5 | 7    | 10.5 | 26   | 7    | 7    | 6    | 29.5 | 3    |
| 4395 | 63.5 | 21   | 11.5 | 28.5 | 13   | 21   | 9    | 30   | 15   |
| 4396 | 26   | 12   | 12   | 22   | 11   | 14   | 8    | 24   | 17   |
| 4397 | 40   | 29.5 | 15   | 29   | 14   | 28   | 12   | 32.5 | 30   |
| 4398 | 35   | 30   | 14   | 36   | 19   | 22   | 11   | 75   | 27   |
| 4399 | 38   | 22   | 15   | 31.5 | 17   | 21   | 11   | 44.5 | 24   |
| 4400 | 21   | 7    | 7    | 17   | 12   | 8    | 6    | 36   | 43   |
| 4401 | 21   | 21   | 9    | 23.5 | 10   | 13   | 7    | 31   | 12   |
| 4402 | 17   | 7    | 5    | 28   | 13   | 8    | 6    | 27   | 12   |
| 4403 | 49   | 40   | 23.5 | 42.5 | 24.5 | 41   | 17   | 63   | 37   |
| 4404 | 31   | 17   | 11   | 31.5 | 11   | 16   | 8    | 36.5 | 16   |
| 4405 | 52   | 43   | 24   | 49   | 28   | 44   | 21   | 85   | 60   |
| 4406 | 31   | 18   | 12   | 31   | 14   | 19   | 10   | 34   | 25   |
| 4407 | 36   | 16   | 10   | 31   | 12   | 17   | 10   | 24.5 | 40   |
| 4408 | 23   | 12   | 12   | 25   | 9    | 14   | 5    | 26   | 20   |
| 4409 | 28   | 17   | 12   | 31   | 12   | 19   | 10   | 28   | 21   |
| 4410 | 31   | 17   | 13   | 35   | 11.5 | 20   | 8    | 23   | 27   |
| 4411 | 19   | 10   | 9    | 25.5 | 10   | 10   | 7    | 70   | 15   |
| 4412 | 31   | 17.5 | 9.5  | 25   | 18   | 18   | 9    | 27.5 | 18   |
| 4413 | 23   | 8    | 8    | 23   | 23.5 | 9    | 5.5  | 20   | 73   |
| 4414 | 30   | 19   | 10   | 28.5 | 13   | 18   | 9    | 26   | 30.5 |
| 4415 | 33   | 22   | 14   | 26.5 | 14   | 21   | 10   | 34   | 61   |
| 4416 | 17   | 11   | 8    | 18.5 | 9    | 11   | 6    | 19.5 | 18   |



|      |      |       |      |       |      |      |      |      |      |
|------|------|-------|------|-------|------|------|------|------|------|
| 4417 | 14   | 6     | 7    | 17    | 8    | 7    | 5    | 18.5 | 18   |
| 4418 | 28   | 17    | 12   | 25.5  | 12   | 18   | 11   | 34   | 18   |
| 4419 | 40   | 29    | 19   | 48.5  | 22   | 30.5 | 14   | 42   | 26   |
| 4420 | 55.5 | 40    | 21   | 39    | 20   | 41   | 17   | 44   | 50   |
| 4421 | 45.5 | 36    | 23.5 | 39    | 17   | 35.5 | 17   | 47   | 36   |
| 4422 | 33   | 19    | 13   | 24.5  | 17   | 18   | 10.5 | 32   | 19   |
| 4423 | 46   | 35    | 16.5 | 29    | 21   | 42.5 | 14   | 34   | 43   |
| 4424 | 32   | 14    | 11   | 21    | 15   | 14   | 9    | 30.5 | 18   |
| 4425 | 30.5 | 23    | 13   | 35    | 16   | 24   | 11.5 | 39   | 53   |
| 4426 | 64.5 | 55    | 27   | 50    | 24   | 53   | 65.5 | 57   | 57.5 |
| 4427 | 44   | 31    | 22   | 32    | 19   | 31   | 22   | 40   | 38   |
| 4428 | 42   | 7     | 7    | 18    | 8    | 7    | 19   | 15   | 13   |
| 4429 | 20   | 8     | 9    | 26    | 13   | 7    | 9    | 22   | 38   |
| 4430 | 25   | 14    | 10   | 27    | 18   | 13   | 7    | 85.5 | 21   |
| 4431 | 24   | 11    | 11   | 31    | 11   | 12   | 10   | 46   | 10   |
| 4432 | 32   | 17    | 12   | 29    | 20   | 17   | 19   | 26   | 23   |
| 4433 | 30   | 22    | 13   | 32    | 15   | 21   | 11   | 30   | 31   |
| 4434 | 38   | 23    | 15   | 36    | 14   | 25   | 10   | 57   | 35   |
| 4435 | 40   | 24.5  | 17   | 35    | 15   | 26   | 12   | 33   | 23   |
| 4436 | 45   | 34.5  | 17   | 50    | 21   | 34   | 16   | 58   | 38   |
| 4437 | 20   | 10    | 6    | 26    | 8    | 11   | 7    | 21   | 5    |
| 4438 | 72   | 61.5  | 32.5 | 55    | 26   | 63   | 27   | 70.5 | 61   |
| 4439 | 26   | 24    | 29.5 | 36    | 23   | 32   | 12   | 20.5 | 22.5 |
| 4440 | 43   | 21    | 40.5 | 20    | 31.5 | 22.5 | 14   | 26   | 36   |
| 4441 | 62   | 26    | 22   | 24    | 26   | 42   | 15   | 34   | 24   |
| 4442 | 20   | 18.5  | 26   | 25    | 18   | 26   | 11   | 14   | 13   |
| 4443 | 22.5 | 15    | 21   | 24    | 16   | 19   | 13   | 20.5 | 10   |
| 4444 | 17   | 13    | 23   | 24    | 15   | 20   | 8    | 13   | 17   |
| 4445 | 69   | 35.5  | 61.5 | 35    | 39   | 79   | 21.5 | 36   | 47   |
| 4446 | 44   | 24    | 77   | 30.5  | 36   | 35   | 17   | 32.5 | 27   |
| 4447 | 18   | 21    | 64   | 24.5  | 18.5 | 20   | 14   | 23   | 14   |
| 4448 | 27   | 19.5  | 32.5 | 24    | 18.5 | 20   | 9    | 15   | 40   |
| 4449 | 24   | 21    | 18.5 | 28    | 18   | 21   | 9    | 26   | 30   |
| 4450 | 26   | 19    | 20   | 30    | 17   | 25   | 9.5  | 16   | 19   |
| 4451 | 29   | 16    | 21   | 35    | 26.5 | 22   | 47   | 16   | 25   |
| 4452 | 30.5 | 18    | 23   | 45.5  | 26   | 23   | 20   | 21   | 23   |
| 4453 | 30   | 38    | 26   | 43    | 22   | 28   | 16   | 33.5 | 59   |
| 4454 | 43   | 22    | 24   | 69    | 29   | 26   | 60   | 28   | 27   |
| 4455 | 33   | 18    | 20   | 48    | 27   | 26   | 20   | 16   | 26   |
| 4456 | 34   | 18    | 21   | 38    | 37   | 20   | 12   | 23   | 65.5 |
| 4457 | 43   | 20    | 25.5 | 35    | 463  | 23   | 44   | 38   | 24   |
| 4458 | 40   | 17    | 23   | 35.5  | 25   | 24   | 12   | 22.5 | 20   |
| 4459 | 20   | 15    | 28   | 22    | 22   | 17   | 11.5 | 19   | 17   |
| 4460 | 720  | 286.5 | 281  | 190.5 | 425  | 430  | 309  | 266  | 375  |
| 4461 | 19   | 12    | 40   | 29    | 22   | 14.5 | 8    | 15.5 | 21   |
| 4462 | 26   | 17    | 49   | 35    | 23   | 21   | 9    | 15   | 20   |
| 4463 | 19   | 13    | 13   | 25    | 15   | 17   | 6    | 11   | 25   |

|      |       |       |      |       |      |       |      |       |      |
|------|-------|-------|------|-------|------|-------|------|-------|------|
| 4464 | 24    | 15.5  | 26   | 30    | 21.5 | 22    | 10   | 15.5  | 22   |
| 4465 | 20    | 13    | 22   | 42    | 21   | 15.5  | 9    | 16    | 17   |
| 4466 | 21    | 12    | 22   | 35.5  | 17   | 15    | 10   | 14    | 21   |
| 4467 | 18    | 24    | 15.5 | 44    | 18   | 15    | 8    | 17    | 22.5 |
| 4468 | 22    | 12.5  | 35   | 43    | 20.5 | 13    | 8    | 14    | 16   |
| 4469 | 18    | 10    | 26   | 30    | 21   | 14    | 9    | 16    | 10   |
| 4470 | 25    | 12    | 19   | 35    | 21   | 17.5  | 9    | 13    | 14   |
| 4471 | 19    | 11    | 23   | 38.5  | 21   | 14    | 8    | 15    | 20   |
| 4472 | 16    | 13    | 21   | 26    | 20   | 14    | 7    | 13    | 13   |
| 4473 | 18    | 14    | 18   | 28    | 17   | 18    | 7    | 13.5  | 12.5 |
| 4474 | 17    | 10    | 16   | 25    | 19   | 12    | 7    | 12    | 40   |
| 4475 | 18    | 15    | 19   | 34    | 28   | 17    | 9    | 14    | 19   |
| 4476 | 20    | 12    | 12.5 | 34    | 14   | 14    | 6    | 12    | 26   |
| 4477 | 28    | 13    | 33   | 50    | 18   | 16    | 10   | 28    | 26   |
| 4478 | 434   | 16    | 19   | 20    | 31   | 22.5  | 11.5 | 109.5 | 22   |
| 4479 | 25    | 14    | 15   | 21    | 20   | 17    | 11   | 106.5 | 14   |
| 4480 | 24    | 11    | 9    | 25    | 18   | 13    | 8    | 15    | 20   |
| 4481 | 50.5  | 13    | 13   | 37    | 27   | 16    | 10   | 13    | 11   |
| 4482 | 21    | 11    | 9    | 16    | 16   | 13    | 11   | 79    | 8    |
| 4483 | 13    | 15    | 10   | 16    | 12   | 16    | 6    | 13    | 10   |
| 4484 | 72    | 57    | 32   | 64    | 35.5 | 59    | 25   | 94    | 61.5 |
| 4485 | 60.5  | 42    | 19   | 44    | 40   | 44    | 14   | 63.5  | 33   |
| 4486 | 36    | 29    | 17   | 36    | 26   | 35    | 13   | 65    | 23   |
| 4487 | 136   | 136   | 63.5 | 102   | 57   | 122   | 52   | 148   | 116  |
| 4488 | 72.5  | 61.5  | 34   | 66    | 39   | 63    | 34   | 126   | 127  |
| 4489 | 47    | 32.5  | 24   | 42    | 29   | 37    | 11   | 70    | 28   |
| 4490 | 27    | 24    | 11   | 32.5  | 28   | 29    | 11   | 50    | 11.5 |
| 4491 | 166   | 140   | 75   | 119   | 67   | 144   | 61   | 178.5 | 120  |
| 4492 | 107.5 | 106   | 56   | 109   | 47   | 106   | 48   | 143   | 81   |
| 4493 | 43    | 37    | 22   | 54    | 24   | 40    | 14   | 68    | 74   |
| 4494 | 41    | 41    | 15   | 42    | 22   | 44    | 13   | 48.5  | 35   |
| 4495 | 134   | 123   | 67   | 109   | 57   | 128   | 55   | 141   | 100  |
| 4496 | 292.5 | 266   | 123  | 178.5 | 98   | 253.5 | 93   | 292   | 282  |
| 4497 | 46    | 36.5  | 26.5 | 45    | 22   | 41    | 18   | 62.5  | 65   |
| 4498 | 34    | 25    | 21   | 34    | 18   | 24    | 16   | 46.5  | 28.5 |
| 4499 | 89    | 87    | 48   | 91.5  | 44   | 84    | 46   | 158   | 70   |
| 4500 | 25    | 18    | 12   | 37    | 15   | 25    | 9    | 37.5  | 9    |
| 4501 | 89    | 89    | 42   | 81.5  | 44   | 91    | 36   | 111   | 84   |
| 4502 | 70.5  | 65    | 35   | 60    | 44.5 | 67    | 27   | 100   | 97   |
| 4503 | 25    | 22    | 16   | 35    | 22   | 22    | 17   | 79.5  | 28   |
| 4504 | 108   | 101   | 52   | 89.5  | 43   | 104   | 41   | 129   | 96   |
| 4505 | 54    | 49    | 22   | 39    | 22   | 49    | 31   | 57    | 48   |
| 4506 | 101.5 | 88.5  | 52   | 88    | 49   | 92    | 44   | 160   | 88   |
| 4507 | 90    | 82    | 43   | 80    | 42   | 85.5  | 37   | 94    | 125  |
| 4508 | 72    | 64    | 33   | 69    | 39   | 67    | 29   | 75    | 56   |
| 4509 | 49    | 40    | 20   | 38    | 20   | 43    | 17   | 53    | 23   |
| 4510 | 161   | 148.5 | 83   | 113   | 69   | 152.5 | 70   | 143   | 118  |

|      |      |      |      |      |      |      |      |       |      |
|------|------|------|------|------|------|------|------|-------|------|
| 4511 | 81   | 70.5 | 32.5 | 53.5 | 32   | 67   | 27   | 68.5  | 57   |
| 4512 | 24   | 20   | 10   | 29   | 14   | 23   | 10   | 33    | 12   |
| 4513 | 29   | 20   | 17   | 34   | 15   | 20   | 11   | 40    | 22   |
| 4514 | 28   | 25   | 19   | 37   | 32   | 29   | 12.5 | 98.5  | 11   |
| 4515 | 45   | 32   | 16.5 | 53   | 26   | 36   | 11   | 49    | 36   |
| 4516 | 85   | 75   | 42.5 | 71   | 51   | 71   | 34   | 112   | 118  |
| 4517 | 29   | 25.5 | 14   | 35   | 18   | 27   | 15   | 53    | 29   |
| 4518 | 110  | 99   | 56.5 | 83   | 49   | 100  | 46   | 108   | 73   |
| 4519 | 40   | 23   | 14   | 35   | 20   | 23.5 | 11.5 | 81    | 37   |
| 4520 | 46.5 | 45   | 31   | 56.5 | 26.5 | 44   | 23   | 75    | 40   |
| 4521 | 93.5 | 68   | 40   | 64   | 48   | 70   | 37   | 87    | 59   |
| 4522 | 30   | 18   | 13   | 32.5 | 15   | 20   | 9    | 40.5  | 32   |
| 4523 | 16   | 12   | 10   | 24   | 15   | 14   | 8    | 28.5  | 11   |
| 4524 | 25   | 14   | 9    | 23   | 12   | 16   | 7    | 22    | 20.5 |
| 4525 | 41   | 13   | 9    | 16   | 12.5 | 16   | 10   | 26    | 5    |
| 4526 | 24   | 17   | 9    | 23   | 12   | 17   | 8    | 27    | 13   |
| 4527 | 23   | 18   | 11   | 41.5 | 16   | 19   | 8    | 43    | 34   |
| 4528 | 13   | 12   | 9    | 19   | 15   | 15   | 7    | 29    | 3    |
| 4529 | 24   | 15   | 10   | 32   | 16   | 17   | 9    | 42    | 5    |
| 4530 | 23   | 17   | 11   | 22   | 20   | 18   | 11   | 55    | 64   |
| 4531 | 21   | 17   | 9    | 17   | 12   | 19   | 8    | 31    | 14   |
| 4532 | 25   | 17   | 14   | 41   | 16   | 15   | 25   | 51    | 19   |
| 4533 | 43   | 23   | 18   | 33   | 65.5 | 27   | 22   | 173   | 20   |
| 4534 | 40   | 16   | 10.5 | 14   | 13   | 20   | 11   | 17    | 13   |
| 4535 | 15   | 14   | 14   | 16   | 15.5 | 14   | 9    | 62    | 3    |
| 4536 | 42   | 23   | 18.5 | 43   | 26   | 22   | 17.5 | 121.5 | 20   |
| 4537 | 25   | 12   | 9    | 20   | 14   | 12   | 8    | 27    | 13   |
| 4538 | 17   | 10   | 9    | 33   | 20   | 13   | 42   | 27    | 40   |
| 4539 | 56   | 27.5 | 16   | 44   | 207  | 20   | 65   | 59    | 21   |
| 4540 | 26   | 19   | 13   | 32   | 29   | 16   | 9    | 60    | 24.5 |
| 4541 | 12   | 14   | 8    | 12   | 8    | 15   | 6    | 15.5  | 3    |
| 4542 | 21   | 16   | 9    | 27   | 15   | 16.5 | 12   | 32    | 4    |
| 4543 | 16   | 14   | 9    | 18.5 | 13   | 15   | 7    | 18    | 3    |
| 4544 | 22   | 16.5 | 14   | 44   | 12   | 18   | 9    | 30    | 7    |
| 4545 | 14.5 | 12   | 9    | 18   | 13   | 12   | 9    | 25    | 16   |
| 4546 | 21   | 17   | 19   | 47   | 29.5 | 15   | 11   | 53    | 58   |
| 4547 | 76   | 16   | 15   | 23   | 21   | 14   | 12   | 55    | 6.5  |
| 4548 | 47   | 17.5 | 13   | 25.5 | 18   | 15.5 | 14   | 68    | 14   |
| 4549 | 22   | 17   | 25   | 21   | 44   | 19   | 11   | 39    | 7    |
| 4550 | 28   | 17.5 | 11   | 21   | 24.5 | 17.5 | 10   | 33.5  | 8    |
| 4551 | 29   | 14   | 35   | 24   | 20   | 14   | 12   | 21    | 6    |
| 4552 | 34   | 17   | 16   | 25.5 | 28   | 20   | 11   | 64    | 7    |
| 4553 | 27.5 | 16   | 9    | 18   | 10   | 17   | 12   | 21    | 22   |
| 4554 | 61   | 38   | 14   | 28   | 17   | 33   | 13   | 32    | 60.5 |
| 4555 | 22   | 11   | 6    | 32   | 14   | 12   | 7    | 21.5  | 7    |
| 4556 | 20   | 12   | 8    | 38.5 | 23   | 13   | 13   | 21    | 7    |
| 4557 | 14   | 12   | 10   | 18   | 13   | 12   | 8    | 34    | 3    |

|      |       |      |      |       |       |      |      |       |      |
|------|-------|------|------|-------|-------|------|------|-------|------|
| 4558 | 16    | 13   | 9    | 16    | 13    | 15   | 11   | 19.5  | 3    |
| 4559 | 36    | 40   | 30   | 50    | 31.5  | 44   | 15   | 220   | 16   |
| 4560 | 48.5  | 27   | 37.5 | 41.5  | 83    | 27   | 29   | 54.5  | 33.5 |
| 4561 | 38    | 24   | 73.5 | 29    | 33    | 22   | 15   | 34    | 25   |
| 4562 | 25    | 22   | 33   | 66.5  | 40    | 23   | 14   | 21    | 32   |
| 4563 | 26    | 19   | 34   | 43    | 28    | 23   | 16   | 19.5  | 22.5 |
| 4564 | 48    | 29   | 60.5 | 58.5  | 33    | 25   | 19   | 125   | 19.5 |
| 4565 | 41    | 11   | 10   | 27    | 25    | 13   | 10   | 25    | 7    |
| 4566 | 56    | 19   | 137  | 35    | 44    | 26   | 22   | 38    | 31   |
| 4567 | 56    | 23   | 78   | 30    | 35    | 27   | 34   | 76    | 24   |
| 4568 | 22    | 16   | 43.5 | 23    | 19    | 19   | 12   | 15.5  | 17   |
| 4569 | 30    | 17   | 37.5 | 28    | 32    | 20   | 27.5 | 18    | 14   |
| 4570 | 17    | 16   | 20   | 36    | 22    | 18   | 9    | 13    | 11   |
| 4571 | 27    | 15   | 17   | 30.5  | 31    | 18   | 11.5 | 54    | 12   |
| 4572 | 34    | 12   | 10   | 25    | 38    | 13   | 7    | 14    | 6    |
| 4573 | 22.5  | 16   | 34   | 37    | 95    | 21   | 22.5 | 38.5  | 14   |
| 4574 | 35    | 14   | 15   | 33    | 25    | 14   | 12   | 80    | 15   |
| 4575 | 29    | 14   | 9    | 14    | 21    | 10   | 12   | 19    | 10   |
| 4576 | 37    | 22   | 41   | 24    | 37.5  | 26   | 16.5 | 24    | 17.5 |
| 4577 | 42    | 21   | 99.5 | 45    | 98.5  | 26   | 23   | 82    | 19.5 |
| 4578 | 49    | 27   | 264  | 45    | 52    | 31   | 31   | 78    | 29   |
| 4579 | 700.5 | 23   | 194  | 47    | 56    | 30   | 40   | 31    | 19   |
| 4580 | 720   | 38   | 22   | 42    | 80    | 26   | 56   | 104.5 | 37   |
| 4581 | 93    | 20   | 14   | 32    | 30.5  | 15   | 18   | 72    | 20   |
| 4582 | 203   | 114  | 392  | 312.5 | 126.5 | 105  | 56   | 67    | 160  |
| 4583 | 194   | 50.5 | 64.5 | 176   | 115   | 51   | 25   | 44.5  | 104  |
| 4584 | 74    | 30   | 82   | 128   | 47    | 31   | 32   | 58    | 48   |
| 4585 | 9     | 11   | 10   | 19    | 11    | 13   | 5    | 10    | 7    |
| 4586 | 28    | 20   | 19   | 19    | 27    | 29   | 11   | 16    | 16   |
| 4587 | 14    | 12   | 10   | 19    | 11.5  | 13.5 | 7    | 20    | 5    |
| 4588 | 32    | 41   | 39.5 | 53.5  | 30    | 32   | 27   | 56    | 45   |
| 4589 | 25    | 35   | 38.5 | 45.5  | 25    | 27   | 25   | 33    | 32   |
| 4590 | 41    | 87   | 72   | 79    | 52.5  | 50   | 44   | 74    | 103  |
| 4591 | 24    | 20   | 37.5 | 47    | 23    | 19   | 14   | 26    | 48   |
| 4592 | 33    | 46   | 38.5 | 53    | 27    | 28   | 22   | 44    | 41   |
| 4593 | 48.5  | 74   | 42   | 70    | 56    | 44   | 35   | 62.5  | 78   |
| 4594 | 39    | 60   | 67   | 64    | 35    | 42   | 32.5 | 55    | 62   |
| 4595 | 47    | 86   | 78   | 88    | 58    | 47.5 | 47   | 83.5  | 84   |
| 4596 | 53    | 96.5 | 79   | 98    | 50    | 58   | 43   | 87    | 86.5 |
| 4597 | 36.5  | 78   | 48   | 83    | 32    | 48   | 34   | 66.5  | 70   |
| 4598 | 41    | 71.5 | 59   | 71    | 36    | 43   | 37   | 69.5  | 68   |
| 4599 | 50    | 64   | 50   | 73.5  | 44    | 41   | 30   | 68    | 72   |
| 4600 | 60    | 71   | 64.5 | 72    | 39    | 54   | 33   | 58    | 68   |
| 4601 | 51    | 73   | 57.5 | 72    | 35    | 61   | 28   | 58    | 66   |
| 4602 | 28    | 41   | 42   | 66    | 34    | 31   | 24   | 55    | 56   |
| 4603 | 43    | 82   | 67.5 | 74    | 45    | 47   | 41   | 74    | 86   |
| 4604 | 46    | 62   | 56.5 | 66    | 31    | 42   | 31   | 56.5  | 68   |

|      |       |       |      |       |       |       |      |       |      |
|------|-------|-------|------|-------|-------|-------|------|-------|------|
| 4605 | 32    | 21    | 82   | 49    | 34    | 22    | 20   | 29    | 151  |
| 4606 | 27    | 13    | 48   | 25    | 56    | 13.5  | 13   | 22    | 21   |
| 4607 | 25    | 12    | 78.5 | 30    | 27    | 14    | 13   | 28    | 14   |
| 4608 | 37.5  | 24    | 27.5 | 33    | 59    | 33    | 12   | 21    | 27   |
| 4609 | 22    | 10    | 27.5 | 29    | 25.5  | 12    | 10   | 22    | 18   |
| 4610 | 24    | 17    | 17   | 30    | 25    | 14.5  | 10   | 20    | 30   |
| 4611 | 21    | 12    | 22   | 32    | 34    | 16    | 11   | 13    | 12   |
| 4612 | 15.5  | 11    | 34   | 30    | 25.5  | 12    | 9    | 15    | 11   |
| 4613 | 31    | 16    | 31   | 36    | 33    | 16    | 13   | 22    | 22   |
| 4614 | 20    | 14    | 25   | 42    | 28    | 16    | 9    | 18    | 22   |
| 4615 | 14    | 9     | 18   | 16    | 18    | 9.5   | 8    | 9     | 9.5  |
| 4616 | 21    | 14    | 23   | 24    | 18    | 18    | 7.5  | 14.5  | 12   |
| 4617 | 26    | 13    | 42   | 31    | 18    | 14    | 9    | 28    | 16   |
| 4618 | 47    | 15    | 72   | 27    | 19    | 18    | 12   | 28    | 13   |
| 4619 | 12    | 10    | 12   | 14    | 15    | 11    | 7    | 10    | 7    |
| 4620 | 357.5 | 28    | 30   | 89    | 31.5  | 39    | 22   | 23.5  | 35   |
| 4621 | 57    | 22    | 11   | 34    | 58    | 24    | 9    | 63    | 27   |
| 4622 | 52    | 14    | 10   | 38    | 31    | 15    | 10   | 27    | 31.5 |
| 4623 | 37    | 20    | 24   | 27    | 309   | 22    | 11   | 28.5  | 17   |
| 4624 | 29    | 21    | 10   | 22    | 18    | 23    | 9    | 64.5  | 17   |
| 4625 | 108   | 27    | 14   | 52    | 34    | 31    | 21   | 34.5  | 20   |
| 4626 | 36    | 18    | 31   | 31    | 33    | 20    | 17   | 30.5  | 20   |
| 4627 | 85    | 18    | 20   | 27.5  | 22    | 22    | 45   | 26.5  | 26   |
| 4628 | 57.5  | 29    | 27   | 23    | 259.5 | 30    | 10   | 24.5  | 14.5 |
| 4629 | 132   | 105   | 49.5 | 89    | 61    | 106   | 45   | 93    | 109  |
| 4630 | 131   | 100   | 50   | 87    | 46    | 102   | 39.5 | 88.5  | 85   |
| 4631 | 135   | 109   | 57   | 81    | 50    | 109.5 | 44   | 108   | 113  |
| 4632 | 194   | 172   | 88   | 107   | 71.5  | 172   | 67   | 166   | 166  |
| 4633 | 118   | 102   | 54   | 77    | 66    | 104   | 47   | 99    | 102  |
| 4634 | 154   | 129.5 | 58.5 | 83    | 55    | 134   | 47.5 | 117.5 | 119  |
| 4635 | 41    | 28    | 17   | 28    | 26    | 32    | 14.5 | 33    | 22   |
| 4636 | 146   | 124   | 52   | 82    | 51    | 124   | 45   | 110   | 113  |
| 4637 | 117   | 96    | 42   | 85    | 45    | 95    | 40.5 | 84    | 81   |
| 4638 | 119   | 109   | 49   | 79    | 48    | 109   | 42   | 104   | 96   |
| 4639 | 164   | 144.5 | 68   | 103   | 61    | 146.5 | 56   | 129   | 151  |
| 4640 | 100   | 84    | 41   | 64    | 35    | 85    | 32   | 68.5  | 81   |
| 4641 | 159   | 139   | 63   | 95    | 72    | 138   | 66   | 118.5 | 157  |
| 4642 | 75    | 57    | 27   | 94    | 41    | 57    | 24.5 | 55    | 68   |
| 4643 | 55    | 43    | 21   | 111.5 | 18    | 53    | 14   | 30.5  | 38.5 |
| 4644 | 108   | 101   | 56   | 88    | 57    | 100   | 57   | 116.5 | 109  |
| 4645 | 34    | 37    | 18.5 | 113   | 15    | 48    | 8    | 31.5  | 36.5 |
| 4646 | 368   | 351   | 175  | 247   | 155.5 | 390   | 156  | 304.5 | 368  |
| 4647 | 49    | 34.5  | 18   | 74    | 21    | 47    | 8    | 29    | 42   |
| 4648 | 20    | 11    | 7    | 11    | 9     | 13    | 5    | 13    | 8    |
| 4649 | 15    | 9     | 6    | 11    | 13    | 13    | 5    | 9.5   | 2    |
| 4650 | 19    | 11    | 6    | 11    | 8     | 12    | 6    | 11    | 7    |
| 4651 | 25    | 14    | 10   | 17.5  | 9     | 15    | 9    | 12.5  | 9    |

|      |       |      |      |       |      |       |      |       |       |
|------|-------|------|------|-------|------|-------|------|-------|-------|
| 4652 | 16    | 9    | 5    | 11    | 12   | 11    | 4    | 12.5  | 7     |
| 4653 | 15    | 9    | 4.5  | 15    | 8    | 11    | 4    | 12    | 3     |
| 4654 | 17    | 8    | 6    | 11    | 9    | 10    | 5    | 10    | 3     |
| 4655 | 27    | 13   | 18   | 13    | 29   | 13    | 6    | 14    | 20    |
| 4656 | 19    | 10   | 5    | 11.5  | 136  | 14.5  | 4    | 11.5  | 2     |
| 4657 | 48    | 9    | 7    | 8     | 10   | 12    | 5    | 11    | 4     |
| 4658 | 247.5 | 123  | 19.5 | 31    | 46   | 341.5 | 12.5 | 26    | 61    |
| 4659 | 19    | 13   | 7    | 16    | 9    | 13    | 6    | 15    | 27    |
| 4660 | 25    | 9    | 7    | 15.5  | 14   | 10    | 7    | 29    | 17    |
| 4661 | 21    | 10   | 6    | 12    | 7    | 11    | 5    | 10    | 16    |
| 4662 | 27    | 13   | 7    | 16    | 10   | 16    | 6    | 12.5  | 6     |
| 4663 | 21.5  | 10   | 7    | 12    | 10   | 11    | 6    | 19    | 23    |
| 4664 | 20    | 10   | 7    | 11    | 9    | 13    | 7    | 16    | 9     |
| 4665 | 16    | 10   | 8    | 15    | 9    | 11    | 4    | 13    | 9     |
| 4666 | 16    | 7    | 5    | 16    | 7    | 8     | 5    | 13    | 10    |
| 4667 | 38    | 10   | 9    | 14    | 19   | 11    | 13   | 41    | 32    |
| 4668 | 248   | 116  | 59   | 248   | 179  | 105   | 693  | 871.5 | 69    |
| 4669 | 70    | 20   | 71   | 29    | 35   | 21    | 20   | 26    | 21.5  |
| 4670 | 24    | 10   | 6    | 20.5  | 15   | 10    | 6    | 16    | 12    |
| 4671 | 24    | 12   | 6    | 27    | 14   | 14    | 7    | 14    | 6     |
| 4672 | 32.5  | 23   | 8    | 33    | 43   | 31    | 11   | 22    | 6     |
| 4673 | 40.5  | 28   | 16   | 42    | 25   | 31    | 11   | 20.5  | 37    |
| 4674 | 96    | 73.5 | 37   | 101.5 | 53.5 | 85    | 23   | 81    | 57    |
| 4675 | 118.5 | 87.5 | 52   | 83.5  | 57   | 99    | 45   | 82    | 80    |
| 4676 | 224   | 192  | 111  | 150.5 | 95   | 202   | 99   | 176   | 188.5 |
| 4677 | 77.5  | 54   | 22   | 56.5  | 33.5 | 56    | 19   | 62    | 39    |
| 4678 | 37.5  | 25   | 12   | 35    | 28   | 30    | 10   | 22    | 28    |
| 4679 | 89    | 79   | 33   | 76    | 34   | 75    | 30   | 65    | 79    |
| 4680 | 33    | 17   | 7    | 33    | 13   | 22    | 6    | 18    | 20    |
| 4681 | 68    | 53   | 29   | 50    | 33   | 58    | 26   | 46    | 57    |
| 4682 | 72.5  | 57   | 24   | 48    | 34   | 58    | 17.5 | 47    | 39    |
| 4683 | 39.5  | 24   | 9.5  | 42.5  | 11   | 32    | 8    | 22.5  | 10    |
| 4684 | 150   | 31   | 12   | 46    | 30   | 37    | 10   | 26    | 18    |
| 4685 | 74    | 36   | 39   | 45    | 23   | 44    | 13   | 35.5  | 33    |
| 4686 | 143.5 | 143  | 64   | 91    | 63   | 133   | 52.5 | 128   | 124.5 |
| 4687 | 141   | 106  | 52   | 95    | 48   | 112   | 50.5 | 88    | 99    |
| 4688 | 29    | 18   | 13   | 30    | 35.5 | 20    | 6    | 18    | 36    |
| 4689 | 57    | 32   | 17   | 50.5  | 27   | 42    | 11   | 28    | 57    |
| 4690 | 42    | 21   | 11   | 40    | 17   | 26    | 8    | 18    | 11    |
| 4691 | 37.5  | 22   | 8    | 34    | 17   | 25    | 6    | 17    | 18    |
| 4692 | 98.5  | 60   | 33   | 63.5  | 37   | 64    | 24.5 | 54    | 67    |
| 4693 | 129.5 | 111  | 53.5 | 94.5  | 54   | 118   | 52   | 103   | 108   |
| 4694 | 74    | 67   | 32   | 61    | 25   | 69    | 24   | 57    | 54    |
| 4695 | 31    | 16   | 8    | 34    | 14   | 21    | 10   | 21    | 19    |
| 4696 | 23    | 13   | 11.5 | 28    | 20   | 19    | 9    | 15.5  | 22    |
| 4697 | 33.5  | 19   | 9    | 29    | 17   | 23    | 8    | 15    | 24    |
| 4698 | 60    | 39   | 18   | 45    | 27.5 | 39.5  | 15.5 | 34    | 33    |

|      |       |       |      |      |      |       |      |       |       |
|------|-------|-------|------|------|------|-------|------|-------|-------|
| 4699 | 65    | 47.5  | 33   | 44   | 30   | 48.5  | 22.5 | 39.5  | 38    |
| 4700 | 59.5  | 47    | 26   | 56   | 25   | 52    | 20   | 45    | 55.5  |
| 4701 | 95    | 81    | 40.5 | 68   | 30.5 | 89.5  | 34   | 69.5  | 65    |
| 4702 | 129   | 101.5 | 41   | 86   | 44   | 102.5 | 86   | 79.5  | 75    |
| 4703 | 33.5  | 18    | 12   | 27   | 16   | 23    | 9    | 13    | 31    |
| 4704 | 80    | 19    | 13   | 37   | 54   | 23    | 9    | 21    | 18    |
| 4705 | 112   | 100   | 49.5 | 72   | 48   | 100   | 40   | 80    | 90    |
| 4706 | 136   | 91.5  | 44   | 75   | 40.5 | 90    | 39   | 82    | 87    |
| 4707 | 155   | 112.5 | 51   | 81   | 49   | 108   | 41   | 97    | 147   |
| 4708 | 47    | 35    | 16   | 50   | 24   | 44    | 13   | 38    | 40    |
| 4709 | 46    | 29    | 15   | 43   | 18   | 34    | 12   | 30    | 46    |
| 4710 | 43    | 20    | 10   | 35   | 20   | 24.5  | 9    | 20    | 17    |
| 4711 | 139   | 60    | 34   | 88.5 | 50   | 53.5  | 17   | 48    | 47.5  |
| 4712 | 70    | 45    | 20   | 59   | 33   | 50    | 16   | 45    | 38    |
| 4713 | 92    | 78    | 37   | 69   | 32   | 81    | 23   | 68    | 68    |
| 4714 | 60    | 52    | 31   | 56   | 23   | 59    | 48   | 53    | 57.5  |
| 4715 | 88    | 68.5  | 35   | 62.5 | 30   | 74    | 29   | 61    | 57.5  |
| 4716 | 65    | 56.5  | 30   | 55   | 27   | 57    | 19   | 46    | 52    |
| 4717 | 139   | 101.5 | 50.5 | 90   | 63   | 106   | 47   | 91    | 85    |
| 4718 | 75    | 67    | 29   | 55   | 30.5 | 71    | 22   | 65    | 60    |
| 4719 | 67    | 30.5  | 16   | 35   | 21.5 | 35    | 11   | 28    | 22    |
| 4720 | 88.5  | 58    | 26.5 | 68   | 30   | 63    | 24   | 56.5  | 60    |
| 4721 | 77    | 39    | 21   | 51   | 24   | 43    | 18   | 37.5  | 53    |
| 4722 | 132   | 120   | 50.5 | 85.5 | 46   | 126   | 46   | 207.5 | 106   |
| 4723 | 36    | 21    | 9    | 34   | 12   | 23    | 8    | 17.5  | 15    |
| 4724 | 148.5 | 65.5  | 34.5 | 63   | 45   | 68.5  | 26   | 58    | 81    |
| 4725 | 91    | 74    | 35   | 62   | 36.5 | 76    | 35   | 68.5  | 74    |
| 4726 | 125.5 | 103.5 | 53   | 100  | 54   | 104   | 48   | 97    | 159.5 |
| 4727 | 44    | 26    | 14   | 36   | 17.5 | 35    | 13   | 24    | 33    |
| 4728 | 110   | 100   | 46.5 | 80.5 | 43   | 96    | 33   | 101   | 91    |
| 4729 | 31    | 16    | 10   | 42   | 17   | 20    | 11   | 18    | 41    |
| 4730 | 40    | 19    | 10   | 34   | 22   | 23    | 9    | 20    | 34    |
| 4731 | 26    | 15    | 12   | 32   | 52   | 19    | 6    | 15.5  | 19    |
| 4732 | 52    | 44    | 20   | 58.5 | 21   | 47    | 16   | 43.5  | 47    |
| 4733 | 16    | 9.5   | 4    | 6    | 5    | 12    | 3    | 7     | 1     |
| 4734 | 21    | 10    | 5.5  | 19   | 35   | 14    | 5    | 11    | 3     |
| 4735 | 26    | 11.5  | 7    | 26   | 22   | 15    | 5    | 13    | 5.5   |
| 4736 | 24    | 13    | 6    | 23   | 11   | 15    | 8.5  | 12.5  | 4     |
| 4737 | 21    | 12    | 6    | 33   | 11   | 16    | 6    | 10    | 4     |
| 4738 | 21    | 14    | 6    | 30   | 17   | 16    | 6    | 13    | 8     |
| 4739 | 60    | 19    | 11   | 60   | 36.5 | 20    | 25   | 136   | 12    |
| 4740 | 18    | 11    | 6    | 20   | 48   | 15    | 6    | 10    | 11    |
| 4741 | 24    | 12    | 5.5  | 25   | 11   | 16    | 5    | 11.5  | 6     |
| 4742 | 27.5  | 11    | 7    | 21   | 13   | 13    | 4    | 9     | 14    |
| 4743 | 17    | 11    | 5    | 20   | 9    | 14    | 5    | 10    | 7     |
| 4744 | 23    | 11.5  | 7    | 27   | 16   | 18    | 6    | 13    | 8     |
| 4745 | 29    | 13    | 9    | 29   | 18   | 16    | 12   | 22    | 81    |

|      |      |       |      |      |       |      |      |      |      |
|------|------|-------|------|------|-------|------|------|------|------|
| 4746 | 22   | 19    | 7    | 20   | 14    | 30.5 | 7    | 106  | 9    |
| 4747 | 17   | 10    | 5    | 10   | 9     | 15   | 4    | 7    | 3    |
| 4748 | 20   | 59    | 34   | 13   | 11    | 15   | 18   | 11   | 4    |
| 4749 | 19   | 10    | 5    | 16   | 11    | 13   | 4    | 9    | 3    |
| 4750 | 21   | 13    | 48   | 16   | 10    | 13   | 5    | 10   | 3    |
| 4751 | 17   | 11    | 5    | 13   | 6     | 13   | 6    | 8    | 5    |
| 4752 | 21.5 | 14    | 43.5 | 22   | 10    | 15   | 6    | 13   | 4    |
| 4753 | 20   | 12    | 5    | 16   | 9     | 20   | 4.5  | 18   | 8    |
| 4754 | 68   | 17    | 11   | 21   | 19    | 24   | 8    | 15   | 6    |
| 4755 | 29   | 17    | 9    | 22   | 27    | 23   | 11   | 36   | 7    |
| 4756 | 29   | 36    | 307  | 22   | 16    | 20   | 16   | 21   | 5    |
| 4757 | 31   | 15    | 8    | 23.5 | 20    | 20   | 9    | 31   | 58   |
| 4758 | 87   | 58.5  | 18   | 55   | 35    | 64   | 14   | 55   | 54   |
| 4759 | 91   | 70    | 31   | 58   | 34.5  | 81   | 28   | 67   | 59.5 |
| 4760 | 58   | 34.5  | 11.5 | 44   | 26    | 38   | 12   | 28   | 20   |
| 4761 | 46   | 26    | 7.5  | 42.5 | 20    | 35   | 8    | 43   | 31   |
| 4762 | 40   | 25    | 8    | 36   | 25    | 31   | 7    | 33   | 13   |
| 4763 | 71   | 47    | 16   | 48   | 43.5  | 48   | 15   | 58   | 33   |
| 4764 | 75   | 43    | 15   | 51   | 38    | 49   | 15   | 69   | 70   |
| 4765 | 65   | 43    | 15   | 60   | 25    | 43   | 15   | 46   | 43   |
| 4766 | 123  | 103   | 40   | 74   | 70.5  | 109  | 31   | 99   | 92   |
| 4767 | 66   | 45    | 22   | 43   | 39    | 47   | 14   | 44   | 49.5 |
| 4768 | 169  | 125   | 55   | 98   | 66    | 133  | 49.5 | 113  | 110  |
| 4769 | 80   | 64    | 30.5 | 65   | 30    | 75   | 20   | 66   | 80   |
| 4770 | 91.5 | 68    | 22   | 54   | 33    | 68.5 | 20   | 52   | 50   |
| 4771 | 67   | 41    | 14   | 50   | 24    | 51   | 14   | 56   | 54   |
| 4772 | 54   | 33    | 13   | 49   | 28    | 39   | 13   | 41   | 48   |
| 4773 | 95   | 76    | 27   | 66   | 29    | 69   | 22   | 65   | 52   |
| 4774 | 25   | 15    | 7    | 34   | 46    | 21   | 10   | 27   | 32   |
| 4775 | 32   | 14    | 6    | 24   | 11    | 19   | 6    | 24   | 9    |
| 4776 | 26   | 18    | 7    | 41   | 20    | 25   | 7    | 42.5 | 12   |
| 4777 | 37   | 18    | 9    | 21   | 11    | 20.5 | 9    | 12   | 6    |
| 4778 | 106  | 20    | 7    | 32   | 20    | 27   | 6    | 27   | 7    |
| 4779 | 15   | 8     | 6    | 14   | 6     | 9    | 15   | 8.5  | 3    |
| 4780 | 58   | 13    | 29.5 | 36   | 12    | 16   | 9    | 18   | 4    |
| 4781 | 42   | 23    | 10   | 25   | 23    | 26   | 12   | 23   | 26   |
| 4782 | 34   | 14    | 9    | 31   | 25    | 20   | 7    | 18   | 5    |
| 4783 | 31   | 16    | 9    | 39.5 | 22    | 22   | 9    | 30   | 44   |
| 4784 | 40   | 16.5  | 20   | 38   | 323   | 23   | 19   | 31   | 21   |
| 4785 | 35   | 15    | 9    | 36   | 18    | 18   | 13   | 23   | 34   |
| 4786 | 50   | 21    | 12.5 | 42   | 376.5 | 33   | 14   | 122  | 71.5 |
| 4787 | 45   | 16.5  | 12.5 | 17   | 14    | 20   | 10   | 20   | 23   |
| 4788 | 15   | 10    | 4    | 6    | 5     | 14   | 3    | 7    | 1    |
| 4789 | 18   | 13    | 8    | 15   | 6.5   | 17   | 3    | 12   | 2    |
| 4790 | 105  | 80.5  | 31   | 69   | 30    | 91   | 24   | 64   | 76   |
| 4791 | 167  | 110.5 | 49   | 83   | 33    | 104  | 34   | 92.5 | 86   |
| 4792 | 79   | 39    | 16.5 | 42   | 20    | 41   | 16   | 36   | 52   |



|      |       |      |      |      |      |      |      |       |      |
|------|-------|------|------|------|------|------|------|-------|------|
| 4793 | 62    | 42.5 | 31   | 46   | 25   | 44   | 20   | 39    | 42   |
| 4794 | 101   | 75   | 38   | 71   | 39   | 75   | 38   | 74    | 68.5 |
| 4795 | 103   | 71.5 | 27   | 55   | 35   | 78   | 23   | 57.5  | 56   |
| 4796 | 59    | 38   | 15   | 40   | 23   | 44.5 | 15   | 41    | 46   |
| 4797 | 68    | 54   | 24   | 63   | 23   | 60   | 27   | 50    | 61   |
| 4798 | 94    | 80   | 39   | 70   | 30   | 84   | 31   | 71    | 68   |
| 4799 | 84    | 53   | 25   | 47   | 24   | 59   | 19   | 54    | 46   |
| 4800 | 41    | 27   | 14   | 38   | 16   | 32   | 13   | 28    | 62   |
| 4801 | 77    | 58   | 30   | 55   | 52.5 | 63   | 27   | 53    | 51   |
| 4802 | 47.5  | 32   | 14   | 41   | 25   | 33.5 | 19   | 29.5  | 33   |
| 4803 | 88    | 67   | 35   | 68   | 36   | 76   | 27   | 65    | 64   |
| 4804 | 99.5  | 69.5 | 31   | 56   | 29   | 73   | 26.5 | 56    | 56   |
| 4805 | 48    | 37   | 16   | 37   | 15   | 41   | 16.5 | 32    | 30   |
| 4806 | 47    | 32   | 15   | 35   | 15   | 35.5 | 13   | 29    | 34   |
| 4807 | 51    | 40   | 21   | 41   | 22   | 40   | 15   | 35    | 45   |
| 4808 | 71    | 45   | 22.5 | 52.5 | 25   | 52   | 19   | 41    | 41.5 |
| 4809 | 64.5  | 48   | 21   | 53   | 24   | 53   | 18   | 45    | 47   |
| 4810 | 89    | 66.5 | 34   | 60   | 52   | 72   | 27   | 58.5  | 107  |
| 4811 | 52    | 39   | 16   | 39   | 16   | 36.5 | 15   | 38    | 38   |
| 4812 | 19    | 12   | 82   | 14   | 8    | 18   | 7    | 11    | 5    |
| 4813 | 77    | 56   | 25.5 | 50   | 29   | 61.5 | 19.5 | 51    | 46   |
| 4814 | 160.5 | 71   | 37   | 61.5 | 46.5 | 72.5 | 29   | 73    | 63   |
| 4815 | 61    | 45   | 22   | 47   | 19   | 46   | 19   | 41    | 37   |
| 4816 | 82    | 59   | 27   | 54   | 24   | 56   | 24   | 52.5  | 61   |
| 4817 | 86    | 62   | 27   | 56   | 27   | 66   | 22   | 56    | 67   |
| 4818 | 97.5  | 80   | 34   | 57   | 38   | 77   | 25   | 67.5  | 75   |
| 4819 | 49    | 40   | 17   | 33   | 20   | 44   | 12   | 32    | 40   |
| 4820 | 52    | 41.5 | 18   | 42   | 19   | 41   | 13   | 36    | 76   |
| 4821 | 66    | 51   | 25   | 48   | 23   | 59.5 | 19.5 | 50    | 44.5 |
| 4822 | 63    | 42.5 | 21   | 52   | 63   | 49   | 20.5 | 41    | 35   |
| 4823 | 72    | 60   | 24   | 55   | 29   | 61   | 21   | 45    | 66   |
| 4824 | 90    | 65   | 34   | 62   | 43   | 70   | 27   | 63    | 66   |
| 4825 | 86.5  | 40   | 16   | 45   | 27.5 | 40.5 | 16   | 40    | 32   |
| 4826 | 54    | 27   | 13   | 35   | 13   | 28   | 11   | 24    | 31   |
| 4827 | 38    | 19   | 18   | 32   | 17   | 22   | 10   | 19    | 27   |
| 4828 | 64    | 47   | 25   | 58   | 27   | 57   | 18   | 43    | 44   |
| 4829 | 47.5  | 25   | 14   | 47   | 15   | 31   | 12   | 26    | 41   |
| 4830 | 84    | 57   | 27   | 58   | 30   | 64   | 22.5 | 53    | 53   |
| 4831 | 43    | 25   | 13   | 34   | 21   | 32   | 11   | 24    | 33   |
| 4832 | 152   | 121  | 60   | 117  | 67   | 132  | 58.5 | 105.5 | 119  |
| 4833 | 152   | 121  | 60   | 117  | 67   | 132  | 58.5 | 105.5 | 119  |
| 4834 | 48    | 42   | 17.5 | 38   | 20   | 44   | 17   | 35    | 43   |
| 4835 | 48    | 42   | 17.5 | 38   | 20   | 44   | 17   | 35    | 43   |
| 4836 | 51    | 44   | 20   | 50.5 | 26   | 47.5 | 15   | 36    | 30   |
| 4837 | 51    | 44   | 20   | 50.5 | 26   | 47.5 | 15   | 36    | 30   |
| 4838 | 47    | 35.5 | 15   | 44   | 21   | 39   | 40.5 | 37    | 24   |
| 4839 | 47    | 35.5 | 15   | 44   | 21   | 39   | 40.5 | 37    | 24   |

|      |      |      |      |      |      |      |      |      |      |
|------|------|------|------|------|------|------|------|------|------|
| 4840 | 68   | 47   | 24   | 47   | 41   | 51.5 | 21   | 48.5 | 66   |
| 4841 | 68   | 47   | 24   | 47   | 41   | 51.5 | 21   | 48.5 | 66   |
| 4842 | 34.5 | 23   | 14   | 31   | 17   | 28   | 11   | 23.5 | 21   |
| 4843 | 34.5 | 23   | 14   | 31   | 17   | 28   | 11   | 23.5 | 21   |
| 4844 | 72   | 55   | 25   | 57.5 | 34   | 56   | 22   | 54   | 46   |
| 4845 | 72   | 55   | 25   | 57.5 | 34   | 56   | 22   | 54   | 46   |
| 4846 | 65   | 56   | 27   | 51   | 36   | 63   | 22   | 126  | 51   |
| 4847 | 65   | 56   | 27   | 51   | 36   | 63   | 22   | 126  | 51   |
| 4848 | 122  | 56   | 26.5 | 60   | 30   | 58   | 24.5 | 53   | 44   |
| 4849 | 122  | 56   | 26.5 | 60   | 30   | 58   | 24.5 | 53   | 44   |
| 4850 | 76   | 57   | 74   | 56.5 | 32   | 67   | 30   | 61.5 | 56   |
| 4851 | 76   | 57   | 74   | 56.5 | 32   | 67   | 30   | 61.5 | 56   |
| 4852 | 70   | 49   | 27   | 58   | 44   | 56   | 24.5 | 57   | 43.5 |
| 4853 | 70   | 49   | 27   | 58   | 44   | 56   | 24.5 | 57   | 43.5 |
| 4854 | 70   | 59   | 26   | 66   | 36   | 61   | 21   | 56   | 63   |
| 4855 | 70   | 59   | 26   | 66   | 36   | 61   | 21   | 56   | 63   |
| 4856 | 85   | 69.5 | 38   | 70   | 80   | 76   | 31   | 69.5 | 65   |
| 4857 | 85   | 69.5 | 38   | 70   | 80   | 76   | 31   | 69.5 | 65   |
| 4858 | 76   | 49   | 27   | 53   | 34   | 57   | 23.5 | 46   | 50   |
| 4859 | 76   | 49   | 27   | 53   | 34   | 57   | 23.5 | 46   | 50   |
| 4860 | 76   | 70   | 36   | 59   | 39   | 71   | 25   | 65   | 72   |
| 4861 | 76   | 70   | 36   | 59   | 39   | 71   | 25   | 65   | 72   |
| 4862 | 85.5 | 50   | 23   | 46   | 29   | 56   | 20   | 45   | 34.5 |
| 4863 | 85.5 | 50   | 23   | 46   | 29   | 56   | 20   | 45   | 34.5 |
| 4864 | 137  | 53   | 31   | 71   | 30   | 55   | 20   | 55   | 53.5 |
| 4865 | 137  | 53   | 31   | 71   | 30   | 55   | 20   | 55   | 53.5 |
| 4866 | 86   | 65.5 | 30   | 60.5 | 27.5 | 67   | 24   | 71   | 120  |
| 4867 | 86   | 65.5 | 30   | 60.5 | 27.5 | 67   | 24   | 71   | 120  |
| 4868 | 87   | 71.5 | 35.5 | 59   | 33   | 81   | 32   | 68.5 | 59   |
| 4869 | 87   | 71.5 | 35.5 | 59   | 33   | 81   | 32   | 68.5 | 59   |
| 4870 | 41.5 | 21   | 13   | 40   | 32   | 24   | 9    | 21   | 29.5 |
| 4871 | 41.5 | 21   | 13   | 40   | 32   | 24   | 9    | 21   | 29.5 |
| 4872 | 72   | 60   | 28   | 52   | 33   | 70   | 25   | 55   | 59   |
| 4873 | 72   | 60   | 28   | 52   | 33   | 70   | 25   | 55   | 59   |
| 4874 | 78   | 64   | 32   | 59   | 31   | 71   | 25   | 60   | 76   |
| 4875 | 78   | 64   | 32   | 59   | 31   | 71   | 25   | 60   | 76   |
| 4876 | 60   | 40   | 18   | 50   | 27   | 43.5 | 17   | 36   | 43   |
| 4877 | 60   | 40   | 18   | 50   | 27   | 43.5 | 17   | 36   | 43   |
| 4878 | 60   | 32   | 19   | 39.5 | 26   | 35   | 17   | 31.5 | 26   |
| 4879 | 60   | 32   | 19   | 39.5 | 26   | 35   | 17   | 31.5 | 26   |
| 4880 | 34   | 18   | 8    | 31   | 15   | 18   | 8    | 16.5 | 14   |
| 4881 | 34   | 18   | 8    | 31   | 15   | 18   | 8    | 16.5 | 14   |
| 4882 | 31.5 | 17   | 14   | 34   | 12   | 18   | 8    | 14   | 41   |
| 4883 | 31.5 | 17   | 14   | 34   | 12   | 18   | 8    | 14   | 41   |
| 4884 | 78   | 68   | 33   | 60.5 | 34   | 73.5 | 25   | 68   | 61   |
| 4885 | 78   | 68   | 33   | 60.5 | 34   | 73.5 | 25   | 68   | 61   |
| 4886 | 110  | 36.5 | 22   | 52   | 29   | 46   | 23   | 37.5 | 58   |

|      |       |       |      |      |      |       |      |       |      |
|------|-------|-------|------|------|------|-------|------|-------|------|
| 4887 | 110   | 36.5  | 22   | 52   | 29   | 46    | 23   | 37.5  | 58   |
| 4888 | 41    | 29    | 12   | 39   | 20   | 29    | 9    | 29    | 23   |
| 4889 | 41    | 29    | 12   | 39   | 20   | 29    | 9    | 29    | 23   |
| 4890 | 89    | 78    | 32.5 | 59   | 36   | 79.5  | 28   | 66    | 76   |
| 4891 | 89    | 78    | 32.5 | 59   | 36   | 79.5  | 28   | 66    | 76   |
| 4892 | 78    | 59    | 29   | 61   | 36   | 64    | 24   | 58.5  | 52   |
| 4893 | 78    | 59    | 29   | 61   | 36   | 64    | 24   | 58.5  | 52   |
| 4894 | 67    | 49    | 24   | 52   | 27   | 53    | 17   | 44.5  | 54   |
| 4895 | 67    | 49    | 24   | 52   | 27   | 53    | 17   | 44.5  | 54   |
| 4896 | 101.5 | 80    | 36   | 59.5 | 30.5 | 82    | 29   | 70    | 76   |
| 4897 | 101.5 | 80    | 36   | 59.5 | 30.5 | 82    | 29   | 70    | 76   |
| 4898 | 57    | 40.5  | 20   | 48   | 20   | 47    | 18.5 | 57    | 45   |
| 4899 | 57    | 40.5  | 20   | 48   | 20   | 47    | 18.5 | 57    | 45   |
| 4900 | 143   | 115   | 51.5 | 78   | 46   | 113.5 | 47   | 99    | 106  |
| 4901 | 143   | 115   | 51.5 | 78   | 46   | 113.5 | 47   | 99    | 106  |
| 4902 | 75    | 60    | 25   | 52   | 27   | 59    | 23   | 49    | 52   |
| 4903 | 75    | 60    | 25   | 52   | 27   | 59    | 23   | 49    | 52   |
| 4904 | 62    | 43    | 24   | 53   | 24   | 54    | 18.5 | 47    | 53   |
| 4905 | 62    | 43    | 24   | 53   | 24   | 54    | 18.5 | 47    | 53   |
| 4906 | 160.5 | 135.5 | 63   | 105  | 66   | 139   | 51   | 110.5 | 149  |
| 4907 | 160.5 | 135.5 | 63   | 105  | 66   | 139   | 51   | 110.5 | 149  |
| 4908 | 74    | 61    | 24   | 54   | 26   | 64    | 22   | 50    | 51   |
| 4909 | 74    | 61    | 24   | 54   | 26   | 64    | 22   | 50    | 51   |
| 4910 | 83.5  | 60    | 29   | 72   | 39   | 60    | 24   | 61.5  | 57.5 |
| 4911 | 83.5  | 60    | 29   | 72   | 39   | 60    | 24   | 61.5  | 57.5 |
| 4912 | 57    | 44    | 18   | 49   | 28.5 | 48    | 17   | 40    | 47.5 |
| 4913 | 57    | 44    | 18   | 49   | 28.5 | 48    | 17   | 40    | 47.5 |
| 4914 | 95    | 75    | 34   | 89   | 31   | 75    | 25   | 67    | 68   |
| 4915 | 95    | 75    | 34   | 89   | 31   | 75    | 25   | 67    | 68   |
| 4916 | 83.5  | 72.5  | 39   | 75   | 40   | 73.5  | 33   | 68    | 68   |
| 4917 | 83.5  | 72.5  | 39   | 75   | 40   | 73.5  | 33   | 68    | 68   |
| 4918 | 76    | 72    | 36   | 62   | 38   | 69    | 28   | 71    | 60   |
| 4919 | 76    | 72    | 36   | 62   | 38   | 69    | 28   | 71    | 60   |
| 4920 | 16    | 12    | 5    | 28   | 9    | 15    | 5    | 13.5  | 2    |
| 4921 | 16    | 12    | 5    | 28   | 9    | 15    | 5    | 13.5  | 2    |
| 4922 | 27.5  | 14    | 7    | 26   | 9    | 15    | 4    | 15    | 3    |
| 4923 | 27.5  | 14    | 7    | 26   | 9    | 15    | 4    | 15    | 3    |
| 4924 | 20    | 12    | 6    | 40   | 12   | 16    | 6    | 14    | 4    |
| 4925 | 20    | 12    | 6    | 40   | 12   | 16    | 6    | 14    | 4    |
| 4926 | 321.5 | 13    | 5    | 14   | 13   | 18    | 7    | 25    | 6    |
| 4927 | 321.5 | 13    | 5    | 14   | 13   | 18    | 7    | 25    | 6    |
| 4928 | 21    | 14    | 6    | 33   | 14   | 19    | 8    | 15    | 4    |
| 4929 | 21    | 14    | 6    | 33   | 14   | 19    | 8    | 15    | 4    |
| 4930 | 19    | 12.5  | 5    | 19   | 16   | 17    | 4    | 12    | 3    |
| 4931 | 19    | 12.5  | 5    | 19   | 16   | 17    | 4    | 12    | 3    |
| 4932 | 48    | 14.5  | 8    | 13   | 14   | 19    | 11   | 11    | 2.5  |
| 4933 | 48    | 14.5  | 8    | 13   | 14   | 19    | 11   | 11    | 2.5  |

|      |       |      |      |      |      |      |     |      |      |
|------|-------|------|------|------|------|------|-----|------|------|
| 4934 | 46    | 11   | 10   | 17   | 27.5 | 12   | 6   | 12   | 6    |
| 4935 | 46    | 11   | 10   | 17   | 27.5 | 12   | 6   | 12   | 6    |
| 4936 | 21    | 11   | 8    | 15   | 47   | 14   | 8   | 15   | 4    |
| 4937 | 21    | 11   | 8    | 15   | 47   | 14   | 8   | 15   | 4    |
| 4938 | 22    | 13   | 8    | 17   | 39   | 16   | 6   | 12   | 4    |
| 4939 | 22    | 13   | 8    | 17   | 39   | 16   | 6   | 12   | 4    |
| 4940 | 30.5  | 12   | 8    | 26   | 12   | 15   | 8   | 17   | 4    |
| 4941 | 30.5  | 12   | 8    | 26   | 12   | 15   | 8   | 17   | 4    |
| 4942 | 34    | 14.5 | 10   | 16   | 15.5 | 18   | 10  | 13   | 9    |
| 4943 | 34    | 14.5 | 10   | 16   | 15.5 | 18   | 10  | 13   | 9    |
| 4944 | 23    | 13   | 9    | 16   | 12   | 17   | 5   | 13   | 3    |
| 4945 | 23    | 13   | 9    | 16   | 12   | 17   | 5   | 13   | 3    |
| 4946 | 95    | 11.5 | 8    | 16   | 12   | 14   | 5   | 12   | 4    |
| 4947 | 95    | 11.5 | 8    | 16   | 12   | 14   | 5   | 12   | 4    |
| 4948 | 30.5  | 14   | 11   | 38   | 16.5 | 15.5 | 9   | 20.5 | 74   |
| 4949 | 30.5  | 14   | 11   | 38   | 16.5 | 15.5 | 9   | 20.5 | 74   |
| 4950 | 32    | 13   | 8    | 24   | 15   | 15   | 12  | 11   | 7    |
| 4951 | 32    | 13   | 8    | 24   | 15   | 15   | 12  | 11   | 7    |
| 4952 | 35    | 17   | 14   | 32   | 22   | 16.5 | 23  | 38   | 12   |
| 4953 | 35    | 17   | 14   | 32   | 22   | 16.5 | 23  | 38   | 12   |
| 4954 | 29    | 15   | 12   | 23   | 16   | 16   | 6   | 12   | 27   |
| 4955 | 29    | 15   | 12   | 23   | 16   | 16   | 6   | 12   | 27   |
| 4956 | 50.5  | 12   | 7    | 43   | 11   | 17   | 7   | 21   | 29   |
| 4957 | 50.5  | 12   | 7    | 43   | 11   | 17   | 7   | 21   | 29   |
| 4958 | 37    | 19   | 11   | 50.5 | 25   | 27   | 18  | 34   | 124  |
| 4959 | 37    | 19   | 11   | 50.5 | 25   | 27   | 18  | 34   | 124  |
| 4960 | 44    | 26.5 | 9    | 36   | 18   | 31   | 7   | 19   | 29.5 |
| 4961 | 84.5  | 64   | 24   | 53   | 28   | 67   | 19  | 50   | 46   |
| 4962 | 36    | 21.5 | 10.5 | 29   | 15   | 27   | 7   | 19   | 25   |
| 4963 | 87    | 57   | 25   | 64   | 23   | 67   | 28  | 53.5 | 51   |
| 4964 | 189   | 64   | 26.5 | 71   | 30   | 69   | 20  | 53   | 48   |
| 4965 | 108   | 20   | 9    | 34   | 16   | 25   | 7   | 16   | 13   |
| 4966 | 45    | 22   | 8.5  | 29   | 14   | 27   | 7   | 15   | 19   |
| 4967 | 52    | 28.5 | 12   | 39   | 14   | 31.5 | 7   | 19   | 26   |
| 4968 | 54    | 29   | 13   | 33   | 16   | 38   | 8.5 | 25   | 31   |
| 4969 | 66    | 36   | 19   | 43   | 27   | 41   | 20  | 30   | 26   |
| 4970 | 46    | 25   | 12.5 | 33   | 15   | 29   | 13  | 21   | 38   |
| 4971 | 74    | 41.5 | 18   | 38   | 21   | 48   | 12  | 38   | 33   |
| 4972 | 120.5 | 76.5 | 38   | 66   | 37   | 86   | 29  | 75   | 65   |
| 4973 | 41    | 25   | 8    | 37   | 267  | 35   | 9   | 21   | 25   |
| 4974 | 59    | 30   | 19.5 | 36   | 48   | 34   | 12  | 25   | 30   |
| 4975 | 43.5  | 23   | 14.5 | 39   | 12   | 32   | 7   | 23   | 10   |
| 4976 | 113.5 | 87   | 40   | 70   | 34   | 92   | 31  | 75   | 75   |
| 4977 | 83    | 59   | 30   | 55.5 | 26   | 67   | 26  | 55   | 54   |
| 4978 | 57    | 27.5 | 18   | 35   | 21.5 | 34   | 14  | 24   | 84.5 |
| 4979 | 77    | 40.5 | 17   | 45   | 21   | 40   | 12  | 32   | 33   |
| 4980 | 44    | 21   | 12   | 33   | 21   | 28   | 43  | 28.5 | 51   |

|      |      |      |      |       |      |      |      |      |      |
|------|------|------|------|-------|------|------|------|------|------|
| 4981 | 101  | 69   | 29   | 59.5  | 45.5 | 76   | 22   | 59   | 75   |
| 4982 | 87   | 39   | 20   | 50    | 21   | 46.5 | 15   | 35   | 74   |
| 4983 | 59   | 41   | 33   | 40    | 19.5 | 49   | 19   | 31   | 34   |
| 4984 | 90   | 51   | 27   | 50    | 30   | 60   | 20   | 49   | 57   |
| 4985 | 59   | 39.5 | 16   | 40    | 18   | 43   | 12   | 33   | 32   |
| 4986 | 45   | 24   | 12.5 | 40    | 37   | 30   | 13   | 23   | 51   |
| 4987 | 75   | 47   | 19   | 47    | 18.5 | 56   | 16   | 39   | 40   |
| 4988 | 90   | 58   | 28.5 | 63    | 37   | 66   | 26   | 51   | 47.5 |
| 4989 | 48   | 33   | 12   | 42    | 14   | 38   | 10.5 | 24   | 32   |
| 4990 | 62   | 39   | 23   | 53    | 23   | 44   | 16   | 38   | 56   |
| 4991 | 79   | 53   | 28   | 61.5  | 32.5 | 57   | 25   | 50   | 49   |
| 4992 | 102  | 64   | 30   | 67    | 28   | 71   | 22   | 55   | 59   |
| 4993 | 162  | 92   | 39   | 66    | 42   | 107  | 34.5 | 78   | 72   |
| 4994 | 76.5 | 70   | 28   | 46    | 28   | 59   | 24   | 44   | 117  |
| 4995 | 85   | 64   | 27   | 55    | 29   | 63   | 24   | 50   | 72   |
| 4996 | 79.5 | 58.5 | 23.5 | 66.5  | 35   | 58   | 20   | 48   | 40   |
| 4997 | 93.5 | 47   | 16   | 45    | 91   | 51   | 16   | 38   | 55   |
| 4998 | 42   | 22   | 11   | 25.5  | 14   | 28   | 12   | 18   | 17   |
| 4999 | 56   | 33   | 18   | 36.5  | 23   | 37   | 13   | 27   | 57   |
| 5000 | 77   | 54.5 | 23   | 54    | 26   | 62   | 20   | 47.5 | 53   |
| 5001 | 72   | 43   | 20   | 71    | 24   | 51   | 20   | 42   | 45   |
| 5002 | 100  | 72   | 35.5 | 79.5  | 35   | 83   | 38.5 | 71.5 | 71   |
| 5003 | 87   | 57   | 28   | 50.5  | 26   | 64   | 23   | 46.5 | 40   |
| 5004 | 25.5 | 15   | 7    | 14    | 9    | 20   | 5    | 10   | 4    |
| 5005 | 87   | 43   | 13   | 78.5  | 15   | 53   | 16   | 77   | 62   |
| 5006 | 27   | 15   | 6    | 25    | 11   | 21   | 6    | 12   | 4.5  |
| 5007 | 25   | 16   | 5    | 29    | 8    | 21   | 5    | 11   | 7    |
| 5008 | 32   | 17   | 9.5  | 15    | 11   | 21   | 19   | 11   | 24   |
| 5009 | 41   | 21   | 9    | 84    | 38   | 28   | 62   | 33   | 19.5 |
| 5010 | 35   | 16   | 10   | 21    | 8    | 21   | 6    | 11   | 5    |
| 5011 | 50.5 | 18   | 9    | 54.5  | 12   | 26   | 10   | 29   | 24   |
| 5012 | 25   | 16.5 | 6    | 30    | 10   | 20   | 5    | 10   | 7.5  |
| 5013 | 43   | 18.5 | 11   | 88    | 13   | 28   | 9    | 59.5 | 8    |
| 5014 | 44   | 23   | 12   | 36    | 17.5 | 32   | 14   | 45   | 53   |
| 5015 | 31   | 21   | 15   | 16    | 54   | 36   | 11   | 14   | 14   |
| 5016 | 47.5 | 19   | 13   | 16    | 47   | 24   | 26   | 14   | 11   |
| 5017 | 28   | 17.5 | 7    | 23    | 8    | 22   | 5    | 13   | 10   |
| 5018 | 57   | 13   | 9    | 17    | 7    | 19   | 8    | 11   | 4    |
| 5019 | 33   | 17   | 7    | 28    | 7    | 21   | 7    | 13   | 12   |
| 5020 | 33.5 | 16   | 8.5  | 37.5  | 12   | 22   | 9    | 12   | 13   |
| 5021 | 56.5 | 22   | 16.5 | 64    | 15.5 | 30   | 17.5 | 90   | 38   |
| 5022 | 41.5 | 15   | 7    | 28    | 12   | 19   | 6    | 15   | 4    |
| 5023 | 23   | 16   | 22   | 16    | 14   | 20   | 7    | 11   | 9    |
| 5024 | 401  | 19   | 16   | 35    | 39   | 22   | 14   | 13   | 6    |
| 5025 | 46.5 | 16.5 | 8    | 18    | 8    | 21   | 7    | 13   | 46   |
| 5026 | 711  | 388  | 99   | 201.5 | 101  | 343  | 117  | 249  | 307  |
| 5027 | 69   | 23   | 20   | 64    | 28   | 31   | 32   | 56   | 26   |

|      |       |      |      |       |       |      |      |      |      |
|------|-------|------|------|-------|-------|------|------|------|------|
| 5028 | 21    | 13   | 6    | 17    | 8     | 16   | 5    | 8    | 8.5  |
| 5029 | 27    | 18   | 6    | 23    | 31    | 23   | 6.5  | 11.5 | 4.5  |
| 5030 | 31    | 16.5 | 6    | 10    | 10    | 21.5 | 6    | 9    | 3    |
| 5031 | 29    | 15   | 6    | 15.5  | 8     | 18   | 4    | 13   | 2    |
| 5032 | 30    | 13.5 | 6    | 13    | 12    | 18   | 17   | 10   | 11   |
| 5033 | 26    | 20   | 5    | 17    | 24    | 25   | 5    | 9.5  | 4    |
| 5034 | 42    | 13   | 10   | 21    | 14    | 15   | 8    | 18   | 5    |
| 5035 | 36.5  | 13   | 10   | 33    | 12.5  | 19   | 14   | 19   | 16   |
| 5036 | 74.5  | 25   | 15   | 101   | 38    | 28   | 14   | 48   | 40   |
| 5037 | 372   | 107  | 18   | 64    | 190.5 | 318  | 22   | 43   | 73   |
| 5038 | 30    | 17   | 9    | 15    | 23    | 21   | 19   | 14   | 9    |
| 5039 | 108.5 | 13   | 11   | 31    | 37    | 15   | 9    | 14   | 37   |
| 5040 | 38.5  | 14.5 | 9    | 44    | 40    | 19   | 12   | 15   | 19   |
| 5041 | 51    | 15   | 11   | 20    | 37    | 20   | 22   | 15   | 15   |
| 5042 | 19.5  | 11   | 6    | 19    | 8     | 14   | 5    | 12   | 5    |
| 5043 | 26    | 11.5 | 7    | 37.5  | 12    | 17   | 6    | 20   | 25   |
| 5044 | 25.5  | 13   | 7    | 31    | 11    | 16   | 7    | 15   | 24   |
| 5045 | 27.5  | 15   | 13   | 20.5  | 11    | 19   | 21   | 25   | 10   |
| 5046 | 23    | 13   | 15   | 27.5  | 9     | 20   | 11   | 15   | 4    |
| 5047 | 15.5  | 9    | 5    | 8     | 5     | 13   | 4    | 7.5  | 1    |
| 5048 | 24    | 12.5 | 8    | 14    | 7     | 13   | 14   | 12   | 11   |
| 5049 | 235.5 | 13   | 10   | 18    | 19.5  | 17   | 11.5 | 13   | 12   |
| 5050 | 361   | 15   | 9    | 14    | 14    | 20   | 5    | 10   | 8.5  |
| 5051 | 454.5 | 11   | 7    | 11    | 13.5  | 14   | 6    | 10   | 7    |
| 5052 | 27    | 16   | 35   | 27    | 24    | 23   | 9    | 34   | 8    |
| 5053 | 51    | 15   | 9    | 25    | 9     | 18   | 17   | 11   | 7    |
| 5054 | 26    | 14   | 7.5  | 18    | 9     | 16   | 14.5 | 14   | 5    |
| 5055 | 20    | 12   | 7    | 12    | 18    | 17   | 14   | 12   | 7    |
| 5056 | 60    | 17   | 10.5 | 44    | 67    | 22   | 14   | 18   | 19   |
| 5057 | 41.5  | 15   | 10   | 38    | 15    | 18   | 10   | 25   | 38   |
| 5058 | 17    | 12   | 51   | 7     | 14    | 14   | 4    | 9    | 1    |
| 5059 | 25    | 18   | 101  | 21    | 7     | 20   | 6    | 15   | 3    |
| 5060 | 56    | 37   | 24   | 339   | 34    | 55   | 16   | 35   | 47   |
| 5061 | 63.5  | 37.5 | 27   | 333   | 31    | 66   | 13   | 41.5 | 68   |
| 5062 | 71    | 46   | 25.5 | 428   | 43    | 58   | 12   | 41   | 63.5 |
| 5063 | 131   | 57   | 25   | 336   | 42    | 75   | 17   | 46   | 86.5 |
| 5064 | 52    | 16   | 10   | 37    | 13    | 21   | 8    | 16   | 16.5 |
| 5065 | 50    | 32   | 19   | 189   | 23    | 49   | 9    | 29   | 59   |
| 5066 | 29    | 12   | 6    | 29    | 11    | 18   | 8    | 11   | 23   |
| 5067 | 55    | 35   | 21   | 266   | 28    | 57   | 8    | 35   | 53   |
| 5068 | 52    | 33.5 | 21.5 | 40    | 22    | 38   | 19   | 32   | 42   |
| 5069 | 68.5  | 53.5 | 28   | 317   | 38    | 73   | 17   | 42.5 | 71   |
| 5070 | 72    | 66   | 32   | 352   | 45    | 76   | 21   | 51   | 116  |
| 5071 | 30    | 11   | 6    | 24    | 17    | 17.5 | 6    | 13   | 16   |
| 5072 | 63    | 39   | 22   | 307.5 | 33    | 53   | 13   | 38   | 91.5 |
| 5073 | 72    | 53.5 | 31   | 51    | 22    | 54   | 20   | 43.5 | 52   |
| 5074 | 57    | 43   | 23   | 337   | 32.5  | 63   | 13   | 45   | 82   |

|      |       |      |      |       |      |      |      |      |      |
|------|-------|------|------|-------|------|------|------|------|------|
| 5075 | 66.5  | 58   | 21.5 | 321.5 | 32   | 64   | 16   | 44   | 63   |
| 5076 | 62    | 44   | 21   | 46    | 24   | 50   | 18   | 38   | 36   |
| 5077 | 74    | 43   | 20   | 317   | 30   | 62.5 | 13   | 46   | 68   |
| 5078 | 89    | 46   | 37   | 52    | 21   | 48   | 21   | 39.5 | 44   |
| 5079 | 61    | 45   | 23   | 283.5 | 31   | 60   | 15   | 41   | 72   |
| 5080 | 48    | 29.5 | 17   | 47    | 19   | 34   | 12   | 27   | 34   |
| 5081 | 57    | 37   | 24   | 272.5 | 36   | 54   | 11   | 34   | 53   |
| 5082 | 66    | 46.5 | 18   | 48    | 19   | 49   | 14   | 42.5 | 47   |
| 5083 | 57    | 34   | 21   | 344   | 27   | 55.5 | 10   | 34   | 63   |
| 5084 | 32    | 19   | 12   | 29    | 17   | 25   | 10   | 18   | 23   |
| 5085 | 77.5  | 51   | 21   | 262   | 29   | 78   | 12   | 49.5 | 68   |
| 5086 | 25    | 12   | 7    | 21    | 13.5 | 15   | 9    | 10   | 8    |
| 5087 | 60    | 43   | 25   | 240.5 | 31   | 61   | 13   | 37   | 65   |
| 5088 | 38    | 18   | 9    | 29    | 30.5 | 20   | 6    | 16   | 26.5 |
| 5089 | 58    | 42   | 20   | 37    | 19   | 43   | 15   | 34   | 32   |
| 5090 | 72.5  | 47   | 25   | 305   | 40   | 86   | 14   | 47   | 67   |
| 5091 | 54    | 34   | 18   | 34    | 19   | 37   | 13   | 27.5 | 25   |
| 5092 | 95    | 54   | 24   | 330   | 60   | 66.5 | 15   | 50   | 68   |
| 5093 | 78    | 49   | 22   | 45    | 48   | 55.5 | 20   | 45   | 48   |
| 5094 | 63    | 48.5 | 23.5 | 255   | 38.5 | 62   | 16.5 | 38   | 74   |
| 5095 | 44    | 28   | 15   | 34    | 15   | 32   | 15   | 25   | 27   |
| 5096 | 126   | 86   | 41   | 73    | 36   | 85.5 | 35   | 75   | 92   |
| 5097 | 58    | 32   | 20   | 305   | 25.5 | 53   | 9    | 34   | 57   |
| 5098 | 83    | 49   | 24   | 51    | 23   | 56   | 18   | 44   | 42   |
| 5099 | 124   | 66   | 33   | 333.5 | 54   | 91   | 27   | 65   | 76   |
| 5100 | 80    | 59   | 32   | 58    | 27   | 63.5 | 27   | 54   | 67   |
| 5101 | 52    | 34.5 | 20   | 220   | 24   | 54   | 10   | 31.5 | 47   |
| 5102 | 55    | 31   | 14   | 42.5  | 18   | 34   | 15   | 26   | 46   |
| 5103 | 92    | 46   | 28   | 441   | 35   | 59   | 14.5 | 50.5 | 63   |
| 5104 | 59    | 42   | 22   | 42    | 122  | 45   | 16   | 37.5 | 46   |
| 5105 | 59    | 33   | 20   | 213   | 42   | 51.5 | 9    | 31   | 77   |
| 5106 | 39    | 18   | 9    | 23.5  | 10   | 19   | 8    | 16   | 23   |
| 5107 | 62    | 42   | 22   | 398   | 31   | 58   | 15.5 | 41.5 | 68   |
| 5108 | 104   | 89   | 48   | 69    | 38.5 | 92   | 36   | 74   | 89   |
| 5109 | 63    | 38   | 20   | 311.5 | 48   | 55.5 | 12   | 34   | 80   |
| 5110 | 53    | 34   | 24   | 276   | 36   | 57   | 9    | 40   | 53   |
| 5111 | 89.5  | 49   | 34   | 47    | 27   | 53   | 22   | 44   | 43   |
| 5112 | 60    | 38   | 23   | 256.5 | 34   | 60   | 12   | 32   | 49   |
| 5113 | 28    | 10   | 7    | 26    | 8.5  | 15   | 7    | 13   | 12   |
| 5114 | 87.5  | 36   | 20   | 222   | 30   | 99   | 9    | 57.5 | 66   |
| 5115 | 49    | 31   | 24   | 264   | 43   | 49   | 10   | 38.5 | 44.5 |
| 5116 | 30    | 18   | 9    | 26    | 10   | 20   | 7    | 17   | 12   |
| 5117 | 63.5  | 35   | 24.5 | 300   | 27   | 53   | 11   | 42.5 | 54   |
| 5118 | 40.5  | 24   | 10   | 32    | 20   | 30   | 13   | 24   | 34   |
| 5119 | 60    | 36   | 26   | 700   | 37   | 52   | 10   | 57   | 46   |
| 5120 | 115.5 | 31   | 16   | 41    | 13   | 35   | 14   | 26   | 27   |
| 5121 | 72    | 62   | 24.5 | 362.5 | 46.5 | 69   | 22   | 47   | 67   |

|      |       |       |      |       |      |       |      |      |      |
|------|-------|-------|------|-------|------|-------|------|------|------|
| 5122 | 136.5 | 102.5 | 40   | 85    | 56.5 | 111   | 41   | 85   | 87.5 |
| 5123 | 66    | 59    | 26   | 269   | 57   | 62.5  | 24   | 47   | 79   |
| 5124 | 52    | 31    | 13.5 | 48    | 18   | 38    | 12   | 25   | 25   |
| 5125 | 69    | 54    | 28.5 | 354.5 | 43   | 68    | 22   | 45   | 89   |
| 5126 | 39    | 19    | 11   | 38    | 13   | 22    | 8.5  | 19   | 17   |
| 5127 | 84.5  | 54    | 25.5 | 51    | 22   | 63    | 20   | 48   | 108  |
| 5128 | 62    | 41    | 23   | 464   | 35   | 52    | 11   | 39.5 | 45   |
| 5129 | 49    | 31    | 18   | 300   | 29   | 54.5  | 10   | 31   | 40   |
| 5130 | 92    | 63    | 30.5 | 49    | 24.5 | 62    | 24   | 57   | 57   |
| 5131 | 68    | 64    | 27   | 294.5 | 34   | 68    | 23   | 48   | 66   |
| 5132 | 37    | 23    | 14   | 40    | 11   | 25    | 9    | 22   | 20   |
| 5133 | 61    | 50    | 22   | 254   | 29   | 56.5  | 19   | 43   | 65   |
| 5134 | 90    | 62    | 33   | 59    | 29   | 64    | 24.5 | 56   | 116  |
| 5135 | 61.5  | 34.5  | 23.5 | 288.5 | 35   | 53    | 13   | 32   | 58   |
| 5136 | 46    | 23    | 14   | 42    | 17.5 | 23.5  | 13   | 21   | 33   |
| 5137 | 111   | 55    | 26   | 289   | 34   | 141.5 | 14   | 99.5 | 73   |
| 5138 | 27    | 15    | 6.5  | 28    | 31   | 17    | 7    | 11   | 11   |
| 5139 | 77.5  | 82    | 30.5 | 322   | 59   | 68    | 31   | 56.5 | 84   |
| 5140 | 21    | 11    | 8    | 23    | 16   | 13.5  | 6    | 10   | 13   |
| 5141 | 60    | 50    | 20   | 361   | 29.5 | 59    | 23   | 41   | 73.5 |
| 5142 | 28    | 13.5  | 7    | 32.5  | 8    | 15    | 6    | 11   | 45.5 |
| 5143 | 57    | 37    | 22   | 343.5 | 29   | 57    | 15   | 36   | 66   |
| 5144 | 62    | 42    | 21   | 48    | 19   | 48    | 18.5 | 36   | 42   |
| 5145 | 42    | 28    | 14   | 154   | 15   | 47    | 6    | 27   | 32   |
| 5146 | 95.5  | 73    | 32   | 61    | 31   | 76    | 33   | 64   | 69   |
| 5147 | 48.5  | 33    | 14   | 269.5 | 23.5 | 52    | 9.5  | 31   | 36   |
| 5148 | 37    | 13    | 7    | 40    | 10   | 17    | 6    | 13   | 36   |
| 5149 | 47.5  | 30    | 15   | 103.5 | 19.5 | 46    | 8    | 27   | 36   |
| 5150 | 50    | 37    | 16   | 44    | 14   | 40    | 16   | 33.5 | 34   |
| 5151 | 50.5  | 27.5  | 17   | 353   | 19   | 48    | 8    | 29   | 32   |
| 5152 | 62    | 44    | 26.5 | 52    | 21   | 48    | 24   | 42   | 62.5 |
| 5153 | 53    | 30    | 15   | 166.5 | 20.5 | 64.5  | 7    | 33   | 38   |
| 5154 | 38.5  | 25    | 12   | 33    | 13   | 27.5  | 10   | 24   | 16   |
| 5155 | 53    | 31.5  | 19.5 | 283   | 20   | 56    | 7.5  | 36   | 42   |
| 5156 | 71    | 59    | 27   | 51    | 24   | 58    | 21   | 53   | 49   |
| 5157 | 54    | 25.5  | 15   | 299   | 20   | 48.5  | 7    | 31   | 35   |
| 5158 | 37.5  | 20    | 11   | 29    | 13   | 24    | 10   | 19   | 17   |
| 5159 | 46    | 26    | 14   | 198.5 | 15   | 46.5  | 7    | 27   | 31   |
| 5160 | 124   | 86    | 36   | 71.5  | 35   | 84    | 38   | 68   | 71   |
| 5161 | 43    | 25    | 13   | 176   | 16   | 43    | 6    | 24   | 28.5 |
| 5162 | 73    | 53    | 31   | 56    | 21   | 54    | 25   | 44.5 | 44.5 |
| 5163 | 41    | 24    | 13   | 161   | 14   | 45    | 9    | 25   | 28   |
| 5164 | 101   | 74    | 37   | 69    | 31   | 79    | 31   | 70   | 67   |
| 5165 | 40    | 25    | 9    | 28    | 15   | 44    | 6    | 24   | 29   |
| 5166 | 82    | 56    | 26   | 49.5  | 23   | 57    | 23   | 47   | 49.5 |
| 5167 | 46    | 28    | 16   | 285   | 17   | 47    | 7    | 32   | 35   |
| 5168 | 154   | 104   | 49   | 81.5  | 121  | 112   | 52.5 | 95   | 91.5 |



|      |       |       |      |       |      |      |     |      |      |
|------|-------|-------|------|-------|------|------|-----|------|------|
| 5169 | 43    | 25    | 10   | 21    | 13.5 | 50   | 5   | 24.5 | 29   |
| 5170 | 105.5 | 82    | 42   | 88    | 47   | 82   | 44  | 70   | 66   |
| 5171 | 48    | 24    | 10   | 129.5 | 15   | 54   | 6   | 26   | 33   |
| 5172 | 60    | 29    | 15   | 38.5  | 15   | 36.5 | 15  | 32   | 24   |
| 5173 | 42    | 26    | 15   | 318   | 18   | 46   | 8   | 26   | 27.5 |
| 5174 | 54.5  | 35    | 16   | 48    | 19   | 36   | 15  | 32   | 27   |
| 5175 | 39    | 22    | 7    | 18    | 13   | 46   | 5   | 24   | 29   |
| 5176 | 44    | 17    | 9    | 68.5  | 15   | 22   | 9   | 50.5 | 176  |
| 5177 | 55    | 25    | 16   | 278   | 17   | 43   | 9   | 27.5 | 30   |
| 5178 | 25    | 13    | 19   | 35    | 152  | 17   | 8   | 20   | 44   |
| 5179 | 41    | 23    | 12   | 171   | 15   | 44   | 7   | 24.5 | 29   |
| 5180 | 23    | 10    | 5    | 23    | 7    | 14   | 5   | 11   | 5    |
| 5181 | 36    | 19    | 8    | 13.5  | 12   | 44   | 5   | 21   | 22   |
| 5182 | 38    | 26    | 9    | 17    | 16   | 45.5 | 5   | 23   | 29   |
| 5183 | 335.5 | 188.5 | 51.5 | 107.5 | 58   | 168  | 68  | 118  | 169  |
| 5184 | 42    | 25    | 12   | 191   | 22   | 46   | 6   | 25.5 | 32   |
| 5185 | 75.5  | 11    | 6    | 26    | 15.5 | 15   | 22  | 13   | 17   |
| 5186 | 43    | 25    | 12   | 155   | 17   | 49   | 5   | 24   | 29   |
| 5187 | 20    | 10    | 5    | 13    | 8    | 16   | 6   | 9    | 3    |
| 5188 | 43    | 24    | 12   | 168   | 24   | 49   | 6   | 26   | 30   |
| 5189 | 29    | 23.5  | 13   | 13    | 8.5  | 32   | 5   | 12   | 12.5 |
| 5190 | 21    | 18    | 9    | 15    | 9    | 24   | 5   | 12   | 12.5 |
| 5191 | 43    | 22.5  | 12   | 154   | 16.5 | 47   | 8   | 22   | 26   |
| 5192 | 22    | 13    | 7    | 27    | 27   | 16   | 6   | 15   | 26   |
| 5193 | 42    | 26.5  | 11   | 109   | 22   | 53   | 5   | 25.5 | 30   |
| 5194 | 55    | 28    | 11   | 44    | 25.5 | 30   | 18  | 20   | 25   |
| 5195 | 50    | 26    | 12   | 95    | 26   | 43   | 10  | 28   | 28   |
| 5196 | 29    | 22    | 9    | 41    | 17   | 28   | 16  | 32.5 | 7    |
| 5197 | 46    | 31    | 18   | 219   | 37   | 45   | 15  | 35   | 32   |
| 5198 | 58    | 20    | 7    | 18    | 12   | 24   | 26  | 14   | 6    |
| 5199 | 71    | 43.5  | 23   | 373   | 22   | 74   | 11  | 70   | 78   |
| 5200 | 69    | 21    | 8    | 40    | 19   | 25   | 8.5 | 17.5 | 23   |
| 5201 | 70.5  | 28    | 19   | 347.5 | 60.5 | 47   | 7   | 34   | 76.5 |
| 5202 | 30    | 22    | 12   | 17    | 12   | 28   | 6   | 15   | 6    |
| 5203 | 76    | 33    | 24   | 330   | 383  | 62   | 9.5 | 38   | 165  |
| 5204 | 41    | 64    | 36   | 53    | 21   | 25.5 | 18  | 24   | 15   |
| 5205 | 50    | 27    | 16   | 106.5 | 28.5 | 50   | 9   | 29   | 30   |
| 5206 | 175.5 | 70    | 80.5 | 172.5 | 165  | 67   | 16  | 95.5 | 59   |
| 5207 | 92    | 29    | 19.5 | 235   | 20   | 50   | 9   | 28   | 35.5 |
| 5208 | 31    | 18    | 8    | 33    | 19   | 20   | 5   | 31   | 22   |
| 5209 | 78.5  | 29    | 21   | 143   | 25   | 48   | 26  | 27   | 35   |
| 5210 | 67    | 51.5  | 22   | 60    | 23   | 51   | 19  | 51   | 42   |
| 5211 | 50    | 38    | 14   | 46.5  | 20   | 40.5 | 12  | 42   | 32   |
| 5212 | 58.5  | 30    | 18   | 100   | 20.5 | 56   | 9   | 29   | 53   |
| 5213 | 74    | 58    | 20   | 53    | 25   | 64   | 18  | 50.5 | 43   |
| 5214 | 61    | 31    | 30   | 312   | 46   | 45   | 12  | 33   | 50   |
| 5215 | 44    | 23    | 12   | 159   | 16   | 47   | 6   | 24   | 34   |

|      |      |      |      |       |      |      |     |      |      |
|------|------|------|------|-------|------|------|-----|------|------|
| 5216 | 36   | 27   | 9    | 37    | 31   | 32   | 8   | 39   | 25   |
| 5217 | 37.5 | 24   | 12   | 84    | 16   | 46   | 5   | 30   | 28   |
| 5218 | 25   | 20   | 8    | 30    | 35   | 24   | 7   | 26.5 | 15   |
| 5219 | 40   | 24   | 11   | 151   | 15.5 | 44   | 6   | 21   | 25.5 |
| 5220 | 71   | 60   | 22   | 63    | 47.5 | 58   | 18  | 61   | 49   |
| 5221 | 39.5 | 24   | 11   | 245.5 | 14   | 44   | 5   | 22   | 26   |
| 5222 | 38   | 21   | 10   | 43    | 21.5 | 31.5 | 9   | 38   | 47   |
| 5223 | 51   | 27   | 15   | 151   | 19   | 47   | 6.5 | 62   | 33   |
| 5224 | 66   | 47   | 13   | 48.5  | 25   | 50   | 13  | 47   | 34   |
| 5225 | 37   | 22   | 13   | 122.5 | 32   | 39   | 7   | 22   | 29   |
| 5226 | 29   | 20   | 8    | 23    | 11   | 22   | 6   | 16   | 25.5 |
| 5227 | 47.5 | 28   | 21   | 278   | 20   | 47   | 6   | 27   | 33   |
| 5228 | 27   | 18   | 6    | 13    | 14   | 21   | 5   | 14   | 15   |
| 5229 | 47   | 24   | 16   | 153   | 19   | 50   | 8   | 29   | 35   |
| 5230 | 51   | 20   | 6    | 14    | 13   | 19.5 | 11  | 15   | 7    |
| 5231 | 54   | 28   | 19   | 203   | 24   | 51   | 10  | 31.5 | 37.5 |
| 5232 | 29   | 21   | 17   | 21    | 21   | 23   | 11  | 18   | 14   |
| 5233 | 38   | 22   | 10   | 59    | 15   | 43   | 5   | 21   | 27   |
| 5234 | 60   | 18   | 8    | 30    | 30   | 26   | 10  | 47.5 | 37   |
| 5235 | 43.5 | 25   | 18   | 553   | 32   | 44.5 | 7   | 28   | 33.5 |
| 5236 | 26   | 20.5 | 9    | 29    | 37.5 | 26   | 23  | 14.5 | 3    |
| 5237 | 38.5 | 23   | 13   | 79    | 17   | 42   | 6   | 24   | 33   |
| 5238 | 26   | 19   | 6    | 21    | 11   | 21   | 6   | 14   | 14   |
| 5239 | 50   | 27.5 | 18   | 216.5 | 23   | 43.5 | 13  | 34   | 49   |
| 5240 | 83   | 22   | 8    | 24    | 18.5 | 26   | 10  | 22   | 10   |
| 5241 | 53.5 | 28   | 12   | 96.5  | 21   | 60   | 9   | 24.5 | 36.5 |
| 5242 | 49.5 | 20.5 | 12   | 32    | 24   | 30   | 11  | 25   | 12   |
| 5243 | 60   | 24.5 | 19   | 156.5 | 31   | 44   | 13  | 26.5 | 34   |
| 5244 | 30   | 19   | 8    | 23.5  | 12   | 23   | 7   | 17   | 80   |
| 5245 | 50   | 26   | 37   | 83    | 47   | 46   | 7   | 25   | 29   |
| 5246 | 57   | 44   | 16   | 263.5 | 23   | 46   | 9   | 32   | 52.5 |
| 5247 | 30   | 16   | 25   | 24    | 14   | 15   | 32  | 15   | 24   |
| 5248 | 36   | 23   | 10   | 136   | 16   | 45.5 | 5   | 24   | 31   |
| 5249 | 25.5 | 19   | 9    | 26    | 14   | 21   | 6   | 19   | 12   |
| 5250 | 45   | 24.5 | 17   | 289   | 20   | 45   | 6   | 42   | 32   |
| 5251 | 29   | 19.5 | 5.5  | 18    | 9    | 23   | 4   | 12   | 10   |
| 5252 | 41.5 | 23   | 12   | 129   | 26   | 45   | 6   | 26.5 | 27   |
| 5253 | 39   | 22   | 12   | 194   | 18   | 43   | 6   | 23   | 34   |
| 5254 | 61.5 | 53   | 18   | 61.5  | 30   | 54   | 15  | 47   | 56   |
| 5255 | 42   | 22   | 10.5 | 161   | 15   | 43   | 6   | 23   | 37   |
| 5256 | 42   | 26   | 12   | 44    | 25   | 34   | 17  | 30   | 26   |
| 5257 | 49   | 25   | 15   | 151.5 | 541  | 45   | 9   | 23   | 34   |
| 5258 | 57   | 35.5 | 20   | 48    | 18   | 37   | 18  | 33   | 37   |
| 5259 | 42   | 24   | 20   | 106   | 29   | 46   | 6   | 26   | 29   |
| 5260 | 44   | 36   | 14   | 33    | 29   | 38   | 11  | 37   | 30.5 |
| 5261 | 46   | 29   | 14   | 158   | 18   | 45   | 6   | 25.5 | 33   |
| 5262 | 40   | 29   | 14   | 32    | 17   | 32   | 13  | 28   | 24   |

|      |       |      |      |       |       |      |      |      |      |
|------|-------|------|------|-------|-------|------|------|------|------|
| 5263 | 42    | 27.5 | 13   | 178.5 | 27    | 42   | 7    | 26   | 32   |
| 5264 | 53    | 34   | 18   | 45    | 24    | 39   | 16   | 32   | 54   |
| 5265 | 186   | 25   | 16   | 313   | 48.5  | 49   | 18   | 32   | 34   |
| 5266 | 42.5  | 30   | 18   | 38    | 31    | 35   | 12   | 26   | 37   |
| 5267 | 48    | 27   | 18   | 182   | 23    | 45   | 8    | 29   | 28.5 |
| 5268 | 68    | 57   | 23   | 49    | 36    | 60   | 21   | 51   | 49   |
| 5269 | 58    | 28   | 17.5 | 211   | 81    | 71   | 8    | 41   | 44   |
| 5270 | 59    | 33   | 12   | 47    | 15    | 35.5 | 12   | 30   | 24   |
| 5271 | 49.5  | 26   | 16   | 281.5 | 52.5  | 44   | 7    | 28   | 31   |
| 5272 | 30    | 22   | 8    | 34    | 18    | 24   | 6    | 20   | 19   |
| 5273 | 67    | 30   | 22   | 295   | 124.5 | 61   | 9    | 32.5 | 40   |
| 5274 | 65    | 42   | 20   | 45    | 22    | 50   | 14.5 | 38   | 42   |
| 5275 | 55.5  | 30   | 25   | 428   | 24    | 47   | 8    | 42   | 45.5 |
| 5276 | 36    | 25   | 11   | 41    | 19    | 32   | 10   | 26   | 21   |
| 5277 | 45.5  | 29   | 23   | 193   | 21    | 45   | 10   | 33   | 36   |
| 5278 | 45    | 31   | 13   | 35    | 15    | 35.5 | 10   | 24   | 26   |
| 5279 | 41    | 26.5 | 13   | 150   | 18    | 47   | 7    | 28.5 | 30   |
| 5280 | 36    | 25   | 11   | 33    | 14.5  | 33   | 11   | 23   | 22   |
| 5281 | 60    | 25.5 | 19   | 208   | 19    | 56   | 7    | 30   | 43   |
| 5282 | 49    | 37   | 15.5 | 47    | 20    | 43   | 12.5 | 36   | 37   |
| 5283 | 50    | 35   | 14   | 37    | 20    | 52   | 13   | 38   | 21   |
| 5284 | 36    | 21   | 11   | 46    | 23.5  | 25   | 77   | 21   | 21   |
| 5285 | 51.5  | 31   | 16   | 46    | 36    | 33   | 14   | 30   | 30.5 |
| 5286 | 50    | 37   | 20   | 275   | 24    | 50   | 10.5 | 30.5 | 57.5 |
| 5287 | 32    | 22.5 | 8    | 37    | 13    | 26   | 8    | 24   | 17   |
| 5288 | 46    | 27.5 | 18   | 286   | 43    | 44   | 11   | 32   | 74   |
| 5289 | 40    | 23   | 14   | 38    | 17    | 30   | 9    | 22   | 24   |
| 5290 | 48    | 45   | 17   | 231.5 | 30    | 50   | 13.5 | 32.5 | 59   |
| 5291 | 64    | 46   | 14   | 37    | 17    | 42   | 12   | 31   | 34   |
| 5292 | 59    | 39   | 20   | 226   | 52    | 51   | 13   | 34   | 53   |
| 5293 | 101.5 | 73   | 30   | 62    | 30    | 74   | 23   | 65   | 69   |
| 5294 | 64    | 49   | 22   | 306.5 | 31    | 60   | 18   | 40   | 63   |
| 5295 | 48.5  | 30   | 14   | 37    | 18    | 32   | 11   | 29   | 42.5 |
| 5296 | 41    | 26   | 17   | 208   | 24    | 42   | 8    | 27   | 36.5 |
| 5297 | 101   | 87.5 | 46.5 | 73.5  | 56    | 90   | 35.5 | 86   | 94   |
| 5298 | 43    | 25   | 15   | 255   | 26    | 45   | 6    | 28   | 34   |
| 5299 | 76.5  | 56   | 23   | 51    | 28    | 60   | 21   | 52   | 57   |
| 5300 | 47    | 24   | 16   | 215.5 | 17    | 47.5 | 7    | 26   | 37   |
| 5301 | 22    | 16   | 7    | 18    | 28.5  | 18   | 7    | 16   | 32.5 |
| 5302 | 59    | 40   | 19   | 278   | 23    | 72   | 12   | 37   | 43   |
| 5303 | 513   | 21   | 14   | 43    | 18    | 26.5 | 23   | 32   | 18   |
| 5304 | 46    | 27   | 19   | 269   | 22    | 42   | 8    | 28   | 49   |
| 5305 | 27    | 21   | 15   | 80    | 35    | 26   | 35   | 46.5 | 19   |
| 5306 | 80    | 41   | 19   | 260   | 26    | 112  | 11   | 51   | 65.5 |
| 5307 | 15    | 13   | 5    | 7     | 5     | 18   | 4    | 8    | 1    |
| 5308 | 53    | 38   | 30   | 289   | 27    | 54   | 18   | 31.5 | 52   |
| 5309 | 16    | 14   | 5    | 17    | 10    | 18   | 5    | 17   | 7    |

|      |       |       |      |       |      |       |      |      |      |
|------|-------|-------|------|-------|------|-------|------|------|------|
| 5310 | 69    | 46    | 31   | 315   | 29   | 56    | 15   | 35   | 50   |
| 5311 | 27    | 23    | 11.5 | 248.5 | 13   | 30.5  | 16.5 | 65   | 3    |
| 5312 | 48    | 36    | 26.5 | 257   | 23   | 43    | 10   | 30   | 43   |
| 5313 | 45    | 22    | 15   | 198.5 | 17   | 43    | 6    | 33.5 | 38   |
| 5314 | 44    | 26    | 16   | 239   | 15   | 41.5  | 9    | 24   | 41   |
| 5315 | 59    | 42    | 27.5 | 81    | 26   | 48    | 20   | 36.5 | 39   |
| 5316 | 63    | 35    | 17   | 261.5 | 19   | 106.5 | 7    | 33.5 | 77   |
| 5317 | 116   | 98    | 47.5 | 67.5  | 44   | 97    | 40   | 94   | 112  |
| 5318 | 54.5  | 31    | 16   | 267   | 23   | 47    | 11   | 28   | 45   |
| 5319 | 88    | 46    | 26   | 54    | 40   | 49    | 19   | 49   | 65.5 |
| 5320 | 45    | 28.5  | 17.5 | 287   | 54   | 43    | 8    | 38   | 37   |
| 5321 | 72    | 48    | 25   | 89    | 35   | 56    | 23   | 60   | 57   |
| 5322 | 44.5  | 27    | 14   | 235   | 22   | 46    | 9    | 29   | 39   |
| 5323 | 139.5 | 84    | 42   | 73.5  | 48   | 86    | 30   | 66   | 102  |
| 5324 | 54    | 41    | 19   | 274.5 | 26   | 54    | 16   | 34   | 49   |
| 5325 | 107   | 87    | 38   | 84    | 54   | 91    | 39   | 81   | 92   |
| 5326 | 43    | 26    | 18   | 231   | 20   | 42    | 6    | 26   | 32   |
| 5327 | 53    | 33    | 39   | 276   | 41   | 49    | 18   | 30.5 | 38.5 |
| 5328 | 64    | 38    | 20   | 48    | 24   | 41    | 13   | 41   | 39   |
| 5329 | 59    | 54    | 21   | 259   | 27   | 51    | 14   | 35.5 | 47   |
| 5330 | 134   | 107.5 | 49.5 | 98    | 69   | 125   | 104  | 103  | 119  |
| 5331 | 38    | 23    | 14   | 206   | 15   | 42    | 6    | 22   | 34   |
| 5332 | 89.5  | 77    | 33.5 | 67    | 37   | 84    | 32   | 75   | 59   |
| 5333 | 50    | 40    | 19   | 239.5 | 29   | 59    | 9    | 33   | 49   |
| 5334 | 88    | 66.5  | 30   | 70    | 70   | 65    | 43.5 | 57   | 73   |
| 5335 | 57    | 50    | 21   | 297.5 | 27   | 59    | 21   | 42   | 56   |
| 5336 | 99    | 71    | 33.5 | 73    | 55   | 78    | 28   | 81.5 | 70   |
| 5337 | 54    | 46    | 21   | 280   | 28   | 58    | 14   | 34   | 57.5 |
| 5338 | 37    | 20    | 11.5 | 33    | 23   | 26    | 9    | 23   | 19   |
| 5339 | 52    | 35    | 21   | 212.5 | 27.5 | 52    | 12   | 32   | 55   |
| 5340 | 61    | 43    | 26   | 55    | 33   | 49    | 23   | 40   | 41   |
| 5341 | 56    | 39    | 21   | 377   | 29   | 50    | 14   | 34   | 47   |
| 5342 | 52    | 31.5  | 18.5 | 273.5 | 21   | 46    | 10   | 31   | 63   |
| 5343 | 52    | 39    | 15   | 50    | 20   | 43    | 18   | 31.5 | 35   |
| 5344 | 42.5  | 24    | 15   | 246.5 | 19   | 43    | 8    | 24   | 36   |
| 5345 | 87    | 67    | 33   | 68    | 34   | 67    | 36   | 57   | 58   |
| 5346 | 43    | 27    | 16   | 306   | 24   | 41.5  | 9.5  | 28   | 35   |
| 5347 | 100.5 | 75.5  | 43   | 75    | 45   | 82    | 36   | 78.5 | 76   |
| 5348 | 45    | 28    | 17   | 299   | 22   | 46    | 9    | 28   | 57   |
| 5349 | 62    | 35    | 19   | 56    | 33   | 42    | 16   | 38   | 32   |
| 5350 | 46    | 27    | 14   | 267   | 19   | 48    | 7    | 28.5 | 30   |
| 5351 | 93    | 67    | 30.5 | 60    | 33   | 73    | 24.5 | 63   | 81   |
| 5352 | 51.5  | 28.5  | 19   | 256   | 25   | 45    | 8    | 26   | 58.5 |
| 5353 | 45.5  | 27    | 16   | 181   | 17   | 42    | 8    | 27   | 34   |
| 5354 | 106   | 54.5  | 25   | 63    | 30   | 57    | 22   | 50.5 | 66   |
| 5355 | 44    | 28    | 16   | 243   | 22   | 44.5  | 7    | 29   | 34   |
| 5356 | 61.5  | 35    | 18   | 44    | 24   | 33    | 16   | 34   | 33.5 |

|      |       |      |      |       |      |      |      |       |      |
|------|-------|------|------|-------|------|------|------|-------|------|
| 5357 | 47    | 27.5 | 16.5 | 255.5 | 18   | 44.5 | 8    | 28    | 39   |
| 5358 | 28    | 14   | 7    | 29    | 16   | 21   | 6    | 18    | 16   |
| 5359 | 45    | 34.5 | 14   | 318.5 | 20   | 48   | 10   | 28    | 42   |
| 5360 | 45.5  | 32.5 | 17   | 280   | 21   | 45   | 11   | 31    | 58   |
| 5361 | 106.5 | 48   | 24.5 | 59    | 37   | 53   | 21   | 52    | 57   |
| 5362 | 39    | 27   | 15   | 280.5 | 17   | 36.5 | 8    | 27    | 32   |
| 5363 | 148   | 99   | 39   | 82    | 68   | 95   | 31   | 86    | 93   |
| 5364 | 35.5  | 22   | 14   | 282.5 | 25   | 35   | 6    | 23    | 38   |
| 5365 | 403.5 | 82   | 23   | 308   | 28   | 607  | 15   | 327   | 127  |
| 5366 | 83    | 64   | 34   | 62    | 34   | 72   | 26.5 | 89    | 66   |
| 5367 | 49    | 25   | 12   | 253   | 15   | 44   | 6    | 26    | 35   |
| 5368 | 62    | 58.5 | 20   | 254.5 | 32   | 58   | 20   | 51    | 54   |
| 5369 | 68    | 38.5 | 20   | 264   | 26   | 81   | 10   | 35    | 49   |
| 5370 | 66    | 42   | 18   | 51    | 24   | 46.5 | 14.5 | 45    | 40   |
| 5371 | 174.5 | 33   | 22   | 352   | 27.5 | 51   | 11   | 30    | 51   |
| 5372 | 89    | 65   | 30   | 61    | 37.5 | 70.5 | 24   | 59    | 58   |
| 5373 | 69.5  | 64   | 41   | 325   | 49.5 | 78   | 26   | 47    | 72   |
| 5374 | 46    | 32   | 18   | 317.5 | 19.5 | 42   | 8    | 28    | 35.5 |
| 5375 | 46.5  | 17.5 | 11   | 33    | 38   | 20   | 12   | 23    | 13   |
| 5376 | 63    | 38   | 21   | 401.5 | 29   | 67   | 12   | 40    | 64   |
| 5377 | 87    | 34   | 14.5 | 49    | 24   | 40.5 | 10   | 34    | 25   |
| 5378 | 55    | 43   | 26   | 381.5 | 33   | 46.5 | 13   | 35    | 60   |
| 5379 | 67    | 26.5 | 14   | 42    | 21   | 28   | 11.5 | 23    | 13.5 |
| 5380 | 48.5  | 27   | 15   | 232   | 23   | 60   | 6    | 30    | 34   |
| 5381 | 111   | 80.5 | 36   | 68    | 62   | 83   | 25.5 | 79    | 78   |
| 5382 | 46    | 27   | 16   | 226   | 26   | 47   | 9    | 27    | 33   |
| 5383 | 49    | 31   | 16   | 49    | 18   | 35   | 11   | 27    | 35   |
| 5384 | 51    | 35.5 | 22   | 329   | 27   | 49   | 10   | 33    | 53   |
| 5385 | 71    | 31   | 16   | 48    | 21   | 37   | 15.5 | 31    | 40   |
| 5386 | 102   | 73   | 57   | 434.5 | 258  | 60.5 | 14   | 42    | 57   |
| 5387 | 84    | 61.5 | 39   | 69    | 41   | 69   | 32   | 65    | 88   |
| 5388 | 74    | 59   | 24   | 396   | 30   | 80   | 14   | 50    | 64   |
| 5389 | 63    | 38   | 19.5 | 57    | 37   | 47   | 19   | 45    | 95   |
| 5390 | 59.5  | 51   | 21   | 292.5 | 81   | 62   | 14   | 44    | 52.5 |
| 5391 | 68.5  | 48.5 | 20   | 54.5  | 28   | 46   | 17   | 42.5  | 57   |
| 5392 | 61.5  | 43   | 25   | 413   | 34   | 54.5 | 16   | 35    | 64   |
| 5393 | 93.5  | 59   | 26   | 54.5  | 25   | 59   | 21   | 51.5  | 68   |
| 5394 | 69    | 49   | 19   | 343   | 26   | 87   | 11   | 43    | 71   |
| 5395 | 50    | 30   | 24   | 279   | 22   | 49.5 | 9    | 32    | 45   |
| 5396 | 33    | 15   | 18   | 53.5  | 30   | 22   | 16   | 40    | 10   |
| 5397 | 63    | 36   | 22   | 264   | 28.5 | 51.5 | 9    | 35    | 56   |
| 5398 | 34    | 17   | 32   | 53    | 14   | 22   | 11   | 35    | 12.5 |
| 5399 | 59    | 35   | 30   | 458   | 23   | 52   | 10   | 28    | 45.5 |
| 5400 | 43    | 19   | 9    | 68    | 16   | 32   | 13   | 75    | 18   |
| 5401 | 65    | 29   | 13   | 85    | 16   | 55   | 18   | 262   | 20   |
| 5402 | 84    | 83   | 27   | 312   | 53   | 73   | 30   | 52    | 88   |
| 5403 | 43    | 28   | 56.5 | 57.5  | 11   | 48.5 | 72   | 149.5 | 14   |

|      |      |      |      |       |       |      |      |      |       |
|------|------|------|------|-------|-------|------|------|------|-------|
| 5404 | 52.5 | 32   | 20   | 317   | 18    | 48.5 | 10   | 31   | 63    |
| 5405 | 45   | 19   | 61   | 63    | 13.5  | 31   | 20   | 63   | 22.5  |
| 5406 | 67.5 | 35.5 | 23.5 | 249.5 | 26    | 53   | 10   | 42   | 55    |
| 5407 | 29.5 | 14.5 | 13   | 49.5  | 86    | 19   | 41   | 21   | 22    |
| 5408 | 53.5 | 20   | 28   | 68    | 23    | 27   | 21   | 46.5 | 37    |
| 5409 | 57   | 40.5 | 24   | 400   | 28    | 65   | 11   | 39   | 67    |
| 5410 | 46   | 18   | 16.5 | 42    | 15    | 21   | 12   | 26   | 26    |
| 5411 | 59   | 15   | 13   | 55    | 52    | 21   | 26   | 35   | 55    |
| 5412 | 48   | 32   | 23   | 309.5 | 27    | 46.5 | 10   | 33.5 | 56    |
| 5413 | 49   | 17.5 | 18   | 77    | 22    | 20   | 12   | 50   | 103   |
| 5414 | 55   | 38   | 23   | 289.5 | 32.5  | 55   | 13   | 37.5 | 65    |
| 5415 | 52   | 17   | 14   | 64.5  | 138   | 22.5 | 11   | 42   | 44    |
| 5416 | 70   | 61   | 26   | 320   | 40    | 68   | 22   | 48   | 71.5  |
| 5417 | 43   | 18.5 | 13   | 44    | 16    | 22   | 10   | 32   | 22    |
| 5418 | 56   | 43   | 22   | 322   | 22    | 59   | 15   | 35   | 53    |
| 5419 | 44.5 | 18   | 19   | 58    | 13    | 27   | 15.5 | 70   | 71    |
| 5420 | 67   | 34   | 19.5 | 305   | 25    | 59   | 10   | 38   | 55    |
| 5421 | 30   | 14   | 7    | 16    | 13    | 19   | 5    | 12.5 | 8     |
| 5422 | 67   | 52.5 | 26   | 398   | 36    | 65   | 23.5 | 51   | 109   |
| 5423 | 24   | 11   | 12   | 36    | 8     | 17   | 11   | 13   | 8     |
| 5424 | 62.5 | 56.5 | 30   | 411   | 38    | 63   | 20   | 49   | 73    |
| 5425 | 27   | 12   | 7    | 31    | 8     | 17   | 6    | 15   | 21    |
| 5426 | 27   | 14   | 7    | 41    | 15    | 19   | 21   | 28   | 28    |
| 5427 | 44   | 25   | 19   | 185   | 18    | 46   | 7    | 26.5 | 54    |
| 5428 | 32   | 19   | 9    | 43    | 16.5  | 27   | 6.5  | 72   | 34    |
| 5429 | 58   | 58   | 21.5 | 335   | 29    | 58   | 20   | 42   | 117   |
| 5430 | 33   | 16   | 10   | 34    | 30    | 21   | 8    | 26   | 45    |
| 5431 | 51   | 39   | 21   | 285.5 | 30    | 50   | 12   | 31   | 96    |
| 5432 | 33   | 14.5 | 16   | 43    | 25    | 18.5 | 8    | 25.5 | 34    |
| 5433 | 54   | 35   | 19   | 164.5 | 21    | 48   | 10   | 29   | 77    |
| 5434 | 62   | 16   | 13.5 | 32    | 19    | 21.5 | 62   | 21.5 | 74    |
| 5435 | 52   | 33   | 19.5 | 230   | 20    | 52   | 9    | 29   | 68.5  |
| 5436 | 41.5 | 18   | 14   | 62.5  | 38.5  | 22   | 15   | 70   | 146   |
| 5437 | 57   | 38   | 27   | 367.5 | 24    | 49.5 | 10.5 | 38   | 71    |
| 5438 | 62   | 38   | 24   | 164.5 | 20    | 60   | 8    | 37   | 60.5  |
| 5439 | 30   | 16   | 14   | 50    | 26    | 17.5 | 38.5 | 20   | 33    |
| 5440 | 46   | 29   | 20   | 236.5 | 16    | 50   | 7    | 27   | 85    |
| 5441 | 52   | 21   | 42   | 156   | 477.5 | 27   | 90   | 74   | 19    |
| 5442 | 56   | 38   | 20   | 294   | 24    | 50   | 12   | 32   | 105.5 |
| 5443 | 338  | 15.5 | 11   | 50.5  | 43    | 20   | 16   | 16   | 34.5  |
| 5444 | 48   | 35   | 17   | 182   | 21    | 48   | 8    | 30   | 85    |
| 5445 | 25   | 12   | 6    | 14    | 10    | 14   | 5    | 9    | 6     |
| 5446 | 54.5 | 29   | 19   | 222   | 22    | 49   | 8    | 35   | 54    |
| 5447 | 26   | 11   | 5    | 13    | 10    | 14   | 7    | 9    | 7     |
| 5448 | 50   | 36   | 23   | 206   | 342   | 46   | 10   | 30   | 128.5 |
| 5449 | 21   | 12   | 6    | 11    | 9     | 13   | 4    | 9    | 8     |
| 5450 | 57   | 47   | 24   | 249   | 29    | 75   | 15   | 40   | 67.5  |

|      |       |      |      |       |      |      |      |      |      |
|------|-------|------|------|-------|------|------|------|------|------|
| 5451 | 23    | 13   | 6    | 10    | 12   | 15   | 4    | 8    | 4    |
| 5452 | 52    | 27   | 17   | 423.5 | 21.5 | 43   | 8    | 31   | 47   |
| 5453 | 19    | 12   | 5    | 10    | 11   | 14   | 7    | 12   | 4    |
| 5454 | 56    | 45   | 21   | 261   | 31   | 89   | 12   | 33   | 63   |
| 5455 | 17    | 10   | 6    | 13    | 14   | 13   | 5    | 11   | 3    |
| 5456 | 58.5  | 38   | 20   | 304.5 | 30.5 | 51   | 10.5 | 31   | 48   |
| 5457 | 43    | 14   | 49   | 73.5  | 24   | 18   | 20   | 27   | 33   |
| 5458 | 49    | 40   | 21   | 362   | 28   | 48.5 | 13   | 33   | 67   |
| 5459 | 32    | 12   | 7    | 56    | 13   | 15   | 18   | 16   | 9    |
| 5460 | 37.5  | 13   | 12   | 45    | 44   | 17   | 87   | 36   | 21   |
| 5461 | 59    | 46   | 22   | 256   | 28   | 64.5 | 15   | 37   | 63   |
| 5462 | 24    | 11   | 5    | 11.5  | 30   | 15   | 9    | 7    | 3    |
| 5463 | 107.5 | 48   | 21   | 315.5 | 27   | 151  | 11   | 74   | 78.5 |
| 5464 | 82    | 33   | 17   | 72    | 81.5 | 41   | 13   | 33   | 52   |
| 5465 | 62    | 55   | 23   | 276   | 32   | 59.5 | 19   | 42   | 57   |
| 5466 | 75    | 17   | 21   | 74.5  | 65   | 18   | 33   | 67   | 43   |
| 5467 | 64.5  | 27   | 18   | 300   | 25   | 39   | 7    | 26   | 33   |
| 5468 | 25.5  | 11   | 8    | 19    | 17   | 13   | 9.5  | 14   | 13   |
| 5469 | 49    | 31   | 16   | 229.5 | 28   | 42.5 | 7    | 27   | 96   |
| 5470 | 22    | 8.5  | 5.5  | 13    | 11   | 11   | 7    | 8    | 3    |
| 5471 | 62    | 27   | 17.5 | 278   | 22.5 | 62   | 9    | 37   | 41.5 |
| 5472 | 118   | 14   | 11   | 69    | 77   | 15   | 8    | 26   | 30   |
| 5473 | 48.5  | 29   | 16   | 297   | 39   | 43   | 7    | 29   | 49   |
| 5474 | 64    | 28.5 | 29   | 45.5  | 76   | 33   | 13   | 68   | 117  |
| 5475 | 55    | 50   | 32   | 278.5 | 29   | 58   | 14   | 37   | 73   |
| 5476 | 48    | 37   | 16   | 317.5 | 23   | 48   | 11   | 32   | 60.5 |
| 5477 | 21    | 9    | 5    | 19    | 7.5  | 11   | 4    | 9    | 3    |
| 5478 | 59    | 45   | 21   | 227   | 32   | 58   | 14   | 33   | 63   |
| 5479 | 18    | 11   | 5    | 9     | 8    | 14   | 5    | 9    | 3    |
| 5480 | 18    | 8    | 6.5  | 37    | 8    | 12   | 19   | 14   | 2    |
| 5481 | 74    | 59   | 26   | 269   | 25   | 85   | 11.5 | 45.5 | 66   |
| 5482 | 17    | 9    | 6    | 18    | 14   | 11   | 10   | 13   | 3    |
| 5483 | 39    | 24.5 | 15   | 290.5 | 19   | 43   | 6    | 26   | 28   |
| 5484 | 20    | 8.5  | 5    | 16    | 10   | 11   | 5.5  | 9    | 6    |
| 5485 | 52    | 34.5 | 19   | 283   | 25   | 44   | 10   | 31.5 | 46   |
| 5486 | 82    | 27   | 10   | 35    | 35.5 | 17   | 28   | 26   | 25   |
| 5487 | 53    | 23   | 22.5 | 441   | 27   | 43   | 8    | 32   | 41   |
| 5488 | 19    | 7    | 6    | 16    | 11   | 10   | 5    | 8    | 6    |
| 5489 | 22    | 10   | 7    | 16    | 17   | 11   | 6    | 10   | 5    |
| 5490 | 63    | 57   | 25   | 475.5 | 39   | 71   | 25   | 45.5 | 73   |
| 5491 | 83    | 11   | 33   | 24    | 21.5 | 14   | 19.5 | 16   | 10   |
| 5492 | 49    | 36   | 23   | 391   | 30   | 56   | 10   | 33   | 46   |
| 5493 | 24    | 9    | 6    | 22    | 10   | 11   | 14   | 11   | 8    |
| 5494 | 52    | 42   | 31.5 | 230   | 26   | 49   | 16   | 37   | 89   |
| 5495 | 32    | 10   | 9    | 19    | 12.5 | 11   | 6    | 10   | 10   |
| 5496 | 56    | 53   | 23   | 342   | 29.5 | 54   | 17   | 40   | 77   |
| 5497 | 41    | 12   | 26   | 37.5  | 30   | 14   | 9    | 16   | 14   |

|      |      |      |      |       |      |      |      |      |      |
|------|------|------|------|-------|------|------|------|------|------|
| 5498 | 41   | 24   | 17   | 395   | 18.5 | 40   | 7    | 32.5 | 37   |
| 5499 | 17.5 | 9    | 6    | 17    | 11   | 10   | 6    | 9    | 6    |
| 5500 | 72.5 | 94   | 33   | 558   | 50   | 74   | 33.5 | 61   | 84.5 |
| 5501 | 37   | 11   | 9    | 25    | 30   | 15   | 11   | 15   | 11   |
| 5502 | 26   | 12   | 9.5  | 28.5  | 15   | 15   | 7    | 16   | 516  |
| 5503 | 60   | 53   | 22   | 302.5 | 31.5 | 61   | 24   | 40   | 68   |
| 5504 | 23   | 8    | 6    | 17    | 11   | 10.5 | 6    | 9    | 4    |
| 5505 | 65.5 | 71.5 | 27   | 466   | 40   | 66   | 29   | 63   | 87   |
| 5506 | 88   | 56.5 | 31   | 53    | 32   | 54   | 23   | 53   | 40   |
| 5507 | 48   | 36.5 | 22   | 338   | 27   | 50   | 11   | 33.5 | 42   |
| 5508 | 49   | 17   | 11   | 41    | 13   | 22   | 11   | 23   | 12.5 |
| 5509 | 85   | 69.5 | 34   | 59.5  | 37   | 74   | 29   | 57   | 84.5 |
| 5510 | 67   | 47   | 30   | 398.5 | 30   | 61   | 15   | 41   | 76   |
| 5511 | 56   | 49   | 21   | 361   | 29   | 58   | 15   | 39   | 94   |
| 5512 | 409  | 106  | 24   | 48.5  | 25   | 107  | 19   | 57   | 47.5 |
| 5513 | 47   | 35.5 | 20.5 | 357.5 | 26   | 48   | 11   | 34.5 | 46   |
| 5514 | 66   | 39   | 16   | 39    | 23   | 48   | 36   | 30   | 40   |
| 5515 | 57   | 50.5 | 22   | 225   | 29   | 61   | 17   | 45.5 | 48   |
| 5516 | 69   | 46   | 24.5 | 62    | 30   | 48   | 21   | 41   | 52   |
| 5517 | 55   | 43   | 21   | 597   | 40   | 48   | 12   | 35   | 47   |
| 5518 | 82.5 | 43.5 | 27   | 492   | 60   | 57   | 34.5 | 41   | 59   |
| 5519 | 45   | 34.5 | 16   | 35    | 19   | 34   | 14   | 28   | 36   |
| 5520 | 45   | 28   | 18   | 288   | 23   | 43   | 9    | 28   | 51   |
| 5521 | 83   | 60   | 28   | 51    | 27   | 55.5 | 23   | 57   | 52.5 |
| 5522 | 47   | 27.5 | 19   | 326   | 28   | 44   | 8    | 28   | 53.5 |
| 5523 | 59   | 29   | 18   | 313.5 | 25   | 41   | 13   | 29   | 45   |
| 5524 | 87   | 71   | 39   | 65.5  | 35   | 69.5 | 28   | 68   | 90.5 |
| 5525 | 53   | 31.5 | 21   | 297   | 27   | 52   | 8    | 33   | 40   |
| 5526 | 49   | 29   | 19   | 365.5 | 28   | 47   | 9    | 31   | 55   |
| 5527 | 60.5 | 35   | 22   | 320   | 35   | 56.5 | 11   | 35   | 61   |
| 5528 | 64   | 46   | 23   | 53    | 22   | 49   | 18   | 45   | 46   |
| 5529 | 76   | 38   | 31   | 397.5 | 37   | 60   | 10   | 40   | 96   |
| 5530 | 74   | 56   | 30   | 50    | 26   | 63   | 23.5 | 52   | 53   |
| 5531 | 73   | 48.5 | 32   | 537.5 | 41   | 59   | 15   | 46.5 | 63   |
| 5532 | 35   | 22   | 12   | 34    | 15   | 27   | 9    | 23   | 26.5 |
| 5533 | 63.5 | 39   | 21   | 406   | 26   | 58   | 9    | 35   | 57.5 |
| 5534 | 48   | 15   | 9    | 33    | 13.5 | 15   | 8    | 19   | 11   |
| 5535 | 48.5 | 27   | 16   | 132   | 21   | 46   | 7    | 30   | 33   |
| 5536 | 24   | 10   | 8    | 32    | 10   | 12.5 | 11   | 13   | 11   |
| 5537 | 43   | 28   | 14   | 97    | 22   | 48   | 8    | 28   | 35   |
| 5538 | 48   | 35   | 14   | 46    | 15.5 | 35   | 18   | 25   | 47   |
| 5539 | 70   | 36   | 23   | 388   | 34.5 | 61   | 8    | 40   | 48   |
| 5540 | 40   | 13   | 8.5  | 33    | 12   | 13   | 6    | 17   | 26   |
| 5541 | 68   | 30   | 19   | 256   | 25   | 52.5 | 16   | 36   | 45   |
| 5542 | 64.5 | 36   | 20   | 210.5 | 64   | 52   | 10   | 35   | 44   |
| 5543 | 44   | 23.5 | 14   | 37    | 15   | 27   | 9    | 27   | 19   |
| 5544 | 74   | 39.5 | 30   | 194   | 49   | 60.5 | 13   | 37   | 55   |



|      |      |      |      |       |      |      |      |      |      |
|------|------|------|------|-------|------|------|------|------|------|
| 5545 | 52   | 30.5 | 19   | 44    | 17   | 36   | 14   | 44   | 61.5 |
| 5546 | 65.5 | 39   | 28   | 344   | 30   | 55.5 | 10   | 44   | 56   |
| 5547 | 34   | 18   | 12   | 31    | 13   | 20   | 8    | 18   | 14   |
| 5548 | 65   | 32   | 19   | 191   | 57   | 58.5 | 8    | 37   | 43   |
| 5549 | 54   | 28   | 15   | 38.5  | 22   | 31   | 14   | 29.5 | 27   |
| 5550 | 60.5 | 33.5 | 23   | 494.5 | 50.5 | 51   | 12   | 51.5 | 120  |
| 5551 | 40   | 18   | 11   | 29    | 13   | 20   | 10   | 17   | 22.5 |
| 5552 | 61.5 | 29   | 22.5 | 263.5 | 47   | 57.5 | 16   | 33   | 40   |
| 5553 | 42   | 26   | 12   | 34.5  | 16   | 28   | 10   | 26   | 19   |
| 5554 | 94.5 | 81.5 | 34   | 59    | 33   | 77   | 26   | 63.5 | 61   |
| 5555 | 76   | 41   | 37   | 807   | 35   | 59   | 14   | 71.5 | 91   |
| 5556 | 59   | 35   | 18   | 40    | 19   | 38   | 15   | 34   | 53   |
| 5557 | 53   | 30   | 22   | 357   | 37   | 47   | 10   | 46   | 52   |
| 5558 | 56   | 42   | 20   | 46.5  | 20.5 | 42   | 31   | 43   | 43   |
| 5559 | 57   | 42   | 21   | 534.5 | 47   | 57   | 9    | 35   | 49   |
| 5560 | 63   | 44   | 27   | 44    | 22   | 51   | 17   | 47   | 47   |
| 5561 | 83   | 34   | 24   | 255   | 52   | 51.5 | 11   | 35.5 | 52   |
| 5562 | 67   | 43   | 21.5 | 40    | 20   | 47   | 18   | 42   | 42   |
| 5563 | 72   | 39.5 | 23   | 309   | 55   | 55   | 13.5 | 36   | 69.5 |
| 5564 | 92.5 | 59   | 29   | 63    | 35   | 57   | 25   | 54.5 | 71   |
| 5565 | 51   | 29   | 20.5 | 193.5 | 22   | 50.5 | 9    | 31.5 | 41.5 |
| 5566 | 63   | 39.5 | 21   | 47.5  | 20   | 42   | 17   | 38   | 40   |
| 5567 | 45   | 26   | 17   | 235.5 | 26   | 45   | 8    | 30   | 40.5 |
| 5568 | 85.5 | 56   | 31   | 59    | 38   | 62   | 33   | 53.5 | 52   |
| 5569 | 39   | 15   | 9    | 34.5  | 12   | 18   | 8    | 18   | 16   |
| 5570 | 31   | 12   | 12   | 39    | 12   | 15   | 6    | 18   | 26   |
| 5571 | 28   | 13.5 | 7    | 29    | 10   | 14.5 | 6    | 17   | 25   |
| 5572 | 56   | 39   | 21   | 44    | 19   | 45   | 16   | 39   | 41   |
| 5573 | 47   | 33   | 18   | 43    | 20   | 35   | 14   | 37.5 | 40   |
| 5574 | 41   | 30   | 13   | 33    | 13.5 | 33   | 11   | 26   | 43.5 |
| 5575 | 53   | 33.5 | 14   | 50    | 16   | 39   | 14   | 34   | 38   |
| 5576 | 46   | 32   | 16   | 39    | 17.5 | 31.5 | 13   | 31   | 36   |
| 5577 | 51.5 | 27   | 14   | 39    | 15   | 33   | 12   | 30   | 37   |
| 5578 | 50   | 29   | 16   | 43    | 17   | 38   | 14   | 35   | 34.5 |
| 5579 | 89   | 35   | 15   | 42    | 18   | 37   | 13   | 30.5 | 28   |
| 5580 | 89   | 66   | 25   | 56    | 30   | 64   | 25   | 55   | 55.5 |
| 5581 | 93   | 81   | 34   | 70    | 36   | 85   | 31   | 77   | 91   |
| 5582 | 99   | 10   | 10   | 25    | 11   | 12   | 9    | 12   | 4.5  |
| 5583 | 22.5 | 10   | 8    | 14    | 14   | 11   | 12   | 18.5 | 3.5  |
| 5584 | 24   | 10   | 7    | 26    | 16.5 | 12   | 19.5 | 15   | 27   |
| 5585 | 23   | 9    | 6    | 21    | 31   | 9.5  | 5    | 11   | 7    |
| 5586 | 34.5 | 9    | 9    | 13    | 12   | 11   | 8    | 10   | 16   |
| 5587 | 77   | 29   | 37   | 123.5 | 39.5 | 30   | 6    | 36.5 | 21   |
| 5588 | 27   | 10.5 | 9.5  | 25    | 14   | 12   | 6    | 45   | 10   |
| 5589 | 59   | 10   | 14   | 55.5  | 17.5 | 14   | 9    | 24   | 9    |
| 5590 | 26.5 | 12.5 | 6    | 19.5  | 13   | 14   | 6    | 11   | 8    |
| 5591 | 26.5 | 8    | 5    | 17    | 17   | 11   | 6.5  | 8    | 6    |

|      |       |       |      |      |       |       |      |       |       |
|------|-------|-------|------|------|-------|-------|------|-------|-------|
| 5592 | 29    | 9     | 6    | 22   | 13    | 12    | 7    | 10    | 5     |
| 5593 | 103.5 | 22    | 8    | 19   | 88    | 27    | 11   | 18    | 6     |
| 5594 | 21    | 19    | 7    | 15   | 11    | 21    | 5    | 11    | 14    |
| 5595 | 73.5  | 46    | 21   | 64   | 180   | 27    | 57.5 | 21    | 24    |
| 5596 | 44    | 24    | 11   | 30   | 28    | 28    | 12   | 19    | 7     |
| 5597 | 23    | 19    | 7.5  | 13   | 19    | 23    | 8    | 11    | 3     |
| 5598 | 117   | 19    | 10   | 18   | 13    | 23    | 25   | 13    | 36.5  |
| 5599 | 41    | 19    | 8    | 23.5 | 19    | 30.5  | 8    | 14    | 10    |
| 5600 | 23    | 23    | 7    | 18   | 14    | 27    | 7    | 14    | 4     |
| 5601 | 36    | 21    | 18   | 19   | 53.5  | 21    | 7    | 15    | 11    |
| 5602 | 22    | 17    | 6.5  | 22   | 22    | 21    | 5    | 12    | 3     |
| 5603 | 66    | 22    | 12   | 63.5 | 822   | 27    | 10   | 38    | 31    |
| 5604 | 70    | 36    | 15   | 60   | 446   | 57    | 12   | 85    | 69    |
| 5605 | 21.5  | 20    | 7    | 12   | 12    | 21    | 6    | 12    | 3     |
| 5606 | 34    | 26    | 8    | 21.5 | 16    | 37    | 11   | 113.5 | 7     |
| 5607 | 23    | 18    | 8    | 33   | 14    | 22.5  | 6    | 15    | 5     |
| 5608 | 29    | 18    | 8    | 38.5 | 27    | 22    | 31   | 16    | 7     |
| 5609 | 41    | 18    | 21   | 28   | 25    | 22    | 10   | 19    | 6     |
| 5610 | 33    | 15    | 8    | 27   | 16    | 20    | 7    | 15    | 10    |
| 5611 | 95    | 77    | 45.5 | 70   | 43    | 82    | 36   | 74    | 72    |
| 5612 | 83.5  | 64    | 26.5 | 67   | 34    | 66.5  | 24   | 59    | 60    |
| 5613 | 96    | 78    | 31   | 62   | 31    | 78    | 29   | 60    | 55    |
| 5614 | 97    | 69    | 31   | 61   | 30    | 73    | 30   | 65    | 68    |
| 5615 | 77    | 60    | 27   | 53   | 27    | 59    | 18   | 49.5  | 78    |
| 5616 | 29    | 23    | 11   | 33   | 16    | 27    | 9    | 18    | 14    |
| 5617 | 49    | 42    | 22   | 49   | 26    | 44    | 16   | 38    | 41    |
| 5618 | 51.5  | 39    | 22   | 43.5 | 22    | 45.5  | 17   | 33    | 30    |
| 5619 | 46.5  | 30    | 14   | 40   | 22    | 36    | 38   | 30    | 24.5  |
| 5620 | 44    | 34.5  | 19   | 55   | 33    | 37    | 16   | 34    | 41    |
| 5621 | 91    | 78    | 35   | 69   | 32    | 76    | 32   | 75    | 83    |
| 5622 | 42    | 33    | 15   | 40   | 16    | 31    | 13   | 29    | 28    |
| 5623 | 30    | 18    | 8    | 33   | 16    | 22    | 15   | 18    | 20    |
| 5624 | 68    | 56    | 27   | 49   | 23    | 64    | 21   | 49    | 44    |
| 5625 | 80    | 68    | 30   | 59   | 51.5  | 73    | 24   | 59    | 86    |
| 5626 | 42    | 27    | 14   | 36   | 18    | 36    | 15   | 27    | 42.5  |
| 5627 | 444   | 457.5 | 194  | 275  | 149.5 | 449   | 175  | 374   | 362   |
| 5628 | 646.5 | 305   | 195  | 209  | 103.5 | 518.5 | 184  | 60    | 402.5 |
| 5629 | 36    | 18    | 20   | 34   | 15    | 21.5  | 8    | 21    | 8     |
| 5630 | 28    | 17    | 8    | 26   | 9     | 19    | 8    | 13    | 4     |
| 5631 | 31    | 18    | 9    | 95   | 11    | 20    | 14   | 17    | 4     |
| 5632 | 16    | 12    | 5    | 7    | 6     | 17.5  | 4    | 7     | 1     |
| 5633 | 23    | 14.5  | 8    | 18   | 11    | 18    | 7    | 14    | 5     |
| 5634 | 24    | 14    | 6.5  | 16   | 10    | 19    | 4    | 10    | 3     |
| 5635 | 23.5  | 17    | 10   | 24   | 12.5  | 20    | 7    | 14.5  | 5     |
| 5636 | 26    | 18    | 10   | 22   | 15    | 21    | 7    | 13    | 12    |
| 5637 | 60    | 18    | 12.5 | 45   | 27    | 22.5  | 10   | 13    | 7     |
| 5638 | 26    | 15    | 6    | 22   | 12    | 20    | 8    | 15    | 7     |

|      |       |       |       |       |       |      |      |       |       |
|------|-------|-------|-------|-------|-------|------|------|-------|-------|
| 5639 | 35    | 15    | 16    | 19    | 17    | 17   | 21   | 14    | 8     |
| 5640 | 36    | 14    | 9     | 50    | 13    | 19   | 7    | 18    | 10    |
| 5641 | 53    | 19    | 10    | 78    | 19    | 34.5 | 13   | 96    | 15.5  |
| 5642 | 19    | 14    | 5     | 18    | 12    | 16   | 4    | 10    | 2     |
| 5643 | 23.5  | 17    | 7     | 31    | 13    | 21.5 | 6    | 16    | 5     |
| 5644 | 112.5 | 97    | 44    | 63.5  | 50    | 89   | 34   | 85.5  | 78    |
| 5645 | 98    | 68    | 44    | 65.5  | 43    | 70   | 36   | 78.5  | 77    |
| 5646 | 46    | 32    | 21    | 34    | 30    | 36   | 15   | 39    | 56    |
| 5647 | 90.5  | 64.5  | 31    | 57    | 46    | 66   | 27.5 | 60    | 69.5  |
| 5648 | 65    | 44    | 21    | 44    | 28    | 46   | 17   | 82.5  | 48    |
| 5649 | 34    | 22    | 12    | 26    | 903   | 27   | 11   | 30    | 47.5  |
| 5650 | 121   | 81    | 43    | 72    | 51    | 80   | 42   | 75    | 77    |
| 5651 | 46    | 25    | 12    | 24    | 20    | 29   | 9    | 24    | 16    |
| 5652 | 376   | 339   | 149   | 206   | 139.5 | 325  | 140  | 295.5 | 300.5 |
| 5653 | 157.5 | 110.5 | 55.5  | 77    | 51.5  | 114  | 48   | 119   | 101   |
| 5654 | 93    | 69    | 26    | 45    | 33    | 69   | 24   | 59    | 75    |
| 5655 | 58    | 14.5  | 8     | 14    | 18    | 19   | 6    | 15    | 12    |
| 5656 | 115   | 83    | 46    | 62.5  | 44    | 87   | 38   | 75.5  | 104   |
| 5657 | 387   | 355   | 197.5 | 244.5 | 161   | 355  | 181  | 292.5 | 347.5 |
| 5658 | 87    | 60    | 25    | 46    | 34    | 67.5 | 24   | 53    | 56    |
| 5659 | 36    | 28    | 11    | 25    | 16.5  | 27   | 9    | 31    | 18    |
| 5660 | 116   | 81    | 42.5  | 58.5  | 71    | 89   | 33   | 78    | 71    |
| 5661 | 100   | 63    | 48.5  | 52    | 36    | 63   | 39   | 54    | 67    |
| 5662 | 39    | 26    | 9     | 22    | 22    | 32   | 7.5  | 21    | 46    |
| 5663 | 97    | 73.5  | 38    | 53    | 41.5  | 73.5 | 30.5 | 77    | 56    |
| 5664 | 75    | 51    | 28    | 46    | 47    | 52   | 27   | 54    | 46    |
| 5665 | 62    | 45    | 20    | 36.5  | 26.5  | 47   | 18   | 40    | 48    |
| 5666 | 54.5  | 34    | 13    | 53    | 17.5  | 37   | 13   | 40.5  | 65    |
| 5667 | 98    | 74    | 38    | 76    | 37    | 77.5 | 31   | 77    | 90    |
| 5668 | 65    | 45    | 16    | 35    | 23    | 48   | 18.5 | 44    | 36    |
| 5669 | 21    | 16    | 7     | 11    | 10    | 17   | 5    | 17    | 6     |
| 5670 | 16    | 11    | 4     | 8     | 6     | 14   | 4    | 9     | 3     |
| 5671 | 30    | 14    | 10    | 14    | 13    | 15   | 5    | 22    | 4     |
| 5672 | 26    | 28    | 16    | 34    | 23    | 27   | 22   | 131   | 4     |
| 5673 | 31    | 11    | 7.5   | 10    | 23.5  | 13   | 4    | 12    | 2     |
| 5674 | 19    | 10    | 5.5   | 12    | 11    | 14   | 4    | 11    | 3     |
| 5675 | 49    | 15.5  | 14    | 17    | 25    | 16   | 11   | 21    | 40    |
| 5676 | 40.5  | 16    | 37    | 40    | 33    | 17   | 32   | 61    | 16    |
| 5677 | 20    | 11    | 5     | 10    | 73    | 13   | 5    | 14    | 3     |
| 5678 | 26    | 13    | 5     | 9     | 10    | 15   | 5    | 9     | 3     |
| 5679 | 61    | 16.5  | 12    | 17.5  | 45    | 17   | 11   | 40    | 6     |
| 5680 | 45    | 16    | 12    | 26.5  | 102   | 17   | 10   | 20    | 21    |
| 5681 | 29.5  | 13    | 8     | 13    | 21    | 14   | 13   | 11.5  | 5     |
| 5682 | 22    | 12.5  | 4     | 16    | 18    | 15   | 4    | 12    | 15    |
| 5683 | 49    | 18    | 7     | 20    | 11    | 17   | 7    | 18    | 60    |
| 5684 | 26    | 11    | 6.5   | 20    | 7     | 15   | 5    | 16    | 42    |
| 5685 | 37.5  | 20    | 13    | 17    | 9     | 21   | 7    | 15    | 57    |

|      |      |      |      |      |      |      |      |       |      |
|------|------|------|------|------|------|------|------|-------|------|
| 5686 | 27   | 14   | 7    | 16   | 8    | 17   | 6    | 13    | 67   |
| 5687 | 26   | 14   | 8    | 16   | 9    | 14   | 8    | 12    | 17   |
| 5688 | 24   | 14   | 10   | 17   | 154  | 16   | 9    | 33    | 7    |
| 5689 | 20   | 12   | 9    | 13.5 | 15   | 15   | 7    | 39.5  | 12   |
| 5690 | 51   | 16.5 | 15   | 44.5 | 23   | 19.5 | 15   | 38    | 11   |
| 5691 | 34   | 33   | 19   | 32   | 48   | 33   | 22   | 138.5 | 12   |
| 5692 | 65   | 14.5 | 13   | 16   | 18   | 15   | 12   | 19    | 12   |
| 5693 | 25   | 14   | 8    | 14   | 13   | 15   | 8    | 21    | 5    |
| 5694 | 40   | 12   | 9    | 17   | 20.5 | 14   | 8    | 12    | 3    |
| 5695 | 21   | 9    | 8    | 19   | 14   | 10   | 7    | 14    | 7    |
| 5696 | 20.5 | 10   | 6    | 22   | 16   | 12   | 7    | 16    | 32   |
| 5697 | 19.5 | 19   | 12   | 23.5 | 18   | 21   | 10   | 100   | 3.5  |
| 5698 | 47   | 39   | 21   | 33   | 34   | 39   | 21   | 35.5  | 60   |
| 5699 | 17.5 | 11   | 6    | 11.5 | 16   | 13   | 6    | 23    | 9    |
| 5700 | 65   | 10   | 7    | 27   | 11   | 12   | 133  | 23    | 16   |
| 5701 | 33   | 11   | 7    | 28   | 15   | 14   | 27   | 22    | 7    |
| 5702 | 21   | 10   | 14   | 27   | 10.5 | 13   | 12   | 15    | 16   |
| 5703 | 20   | 9    | 6    | 13   | 9    | 10   | 5    | 12    | 3    |
| 5704 | 19   | 10   | 11   | 35   | 14   | 11   | 9    | 19    | 3    |
| 5705 | 29   | 15   | 15   | 14   | 18   | 13.5 | 9    | 17    | 9    |
| 5706 | 28   | 13.5 | 48   | 25.5 | 20   | 16   | 10   | 21    | 33   |
| 5707 | 32   | 10.5 | 8    | 24   | 17   | 13   | 7    | 21    | 71   |
| 5708 | 27   | 10   | 12   | 30   | 29   | 13   | 23   | 14    | 25   |
| 5709 | 39   | 16   | 12   | 24   | 26   | 25   | 18   | 29    | 25   |
| 5710 | 25   | 20   | 17   | 20   | 24   | 21   | 18   | 82    | 6    |
| 5711 | 29   | 11   | 11   | 21   | 20   | 13   | 13   | 17    | 35   |
| 5712 | 27   | 12   | 7.5  | 22   | 24   | 14   | 15   | 13    | 16   |
| 5713 | 33   | 9.5  | 20   | 15   | 17   | 12   | 7    | 16    | 36   |
| 5714 | 19   | 10   | 4    | 6    | 9    | 12   | 4    | 7     | 2    |
| 5715 | 40   | 15   | 19   | 26   | 21   | 12   | 16   | 22    | 9    |
| 5716 | 17   | 10   | 7    | 10   | 7    | 12   | 6    | 9     | 3    |
| 5717 | 23   | 12.5 | 14   | 9    | 6    | 10   | 15   | 9     | 3    |
| 5718 | 17.5 | 5    | 10.5 | 10   | 9    | 6    | 10   | 13    | 5    |
| 5719 | 15   | 8    | 6    | 9    | 7    | 11   | 4    | 11    | 2    |
| 5720 | 16   | 7    | 6    | 9    | 7.5  | 10   | 7    | 8     | 2    |
| 5721 | 17   | 10   | 12.5 | 15   | 14   | 8    | 8    | 15    | 6    |
| 5722 | 46   | 13.5 | 11   | 18   | 25   | 15   | 9    | 40    | 11   |
| 5723 | 21   | 10   | 8    | 16   | 31   | 11   | 18   | 12.5  | 6    |
| 5724 | 11   | 4    | 4    | 5    | 3    | 5    | 3    | 5     | 1    |
| 5725 | 16.5 | 8    | 7.5  | 8    | 7    | 12   | 8    | 12    | 4    |
| 5726 | 24   | 9    | 12   | 13   | 9    | 9    | 40   | 12    | 6    |
| 5727 | 34   | 13   | 9.5  | 17   | 26   | 13   | 16   | 20    | 8    |
| 5728 | 72   | 20   | 16   | 23.5 | 26   | 21   | 21.5 | 91    | 23.5 |
| 5729 | 55   | 20   | 12   | 18.5 | 31.5 | 33   | 722  | 31    | 20.5 |
| 5730 | 42   | 20   | 12   | 21   | 66   | 17   | 18   | 48    | 9    |
| 5731 | 64   | 30   | 20   | 97.5 | 30   | 29   | 28   | 94    | 19   |
| 5732 | 51   | 6    | 11   | 16.5 | 77   | 5    | 10   | 11    | 27   |

|      |       |      |      |      |      |      |      |      |      |
|------|-------|------|------|------|------|------|------|------|------|
| 5733 | 54    | 10   | 8    | 37   | 38   | 10   | 10.5 | 34   | 72   |
| 5734 | 106.5 | 10   | 9    | 15   | 10   | 10   | 11   | 12   | 6    |
| 5735 | 27    | 20.5 | 13   | 16   | 17   | 23   | 8    | 38.5 | 5    |
| 5736 | 13    | 6.5  | 5    | 6    | 5    | 9    | 3.5  | 6.5  | 1    |
| 5737 | 198   | 30   | 16   | 30.5 | 20   | 28.5 | 12   | 32   | 40   |
| 5738 | 67.5  | 41   | 13   | 27   | 16   | 40   | 10   | 31.5 | 36   |
| 5739 | 37    | 23   | 15   | 31   | 15   | 25   | 12   | 34   | 21   |
| 5740 | 47    | 23   | 15   | 32   | 17   | 23.5 | 11   | 27   | 25   |
| 5741 | 47    | 34.5 | 17   | 31   | 16   | 33   | 17   | 31.5 | 35   |
| 5742 | 60.5  | 45   | 21   | 37   | 23   | 42   | 16   | 39.5 | 39   |
| 5743 | 67.5  | 49   | 22.5 | 41   | 22   | 53   | 20   | 52   | 65.5 |
| 5744 | 28    | 12.5 | 9    | 20   | 11   | 14   | 7    | 17.5 | 22   |
| 5745 | 52.5  | 32   | 19.5 | 32   | 15   | 33   | 15   | 43.5 | 47   |
| 5746 | 22    | 10   | 9    | 16   | 20   | 10   | 5    | 12   | 28   |
| 5747 | 49    | 32   | 18   | 30   | 18   | 34   | 16   | 36   | 38.5 |
| 5748 | 78    | 53   | 21   | 41   | 20   | 56   | 30   | 51   | 62   |
| 5749 | 45    | 28.5 | 14   | 26   | 16   | 32   | 12   | 31   | 76   |
| 5750 | 37    | 15   | 13.5 | 20   | 21   | 15   | 22   | 18   | 25   |
| 5751 | 43    | 28   | 15   | 36   | 14   | 28   | 11.5 | 32   | 23   |
| 5752 | 60.5  | 39   | 19   | 33   | 26   | 37.5 | 17   | 39   | 37   |
| 5753 | 32    | 9    | 8    | 19.5 | 15   | 10   | 10   | 15.5 | 42   |
| 5754 | 23.5  | 11   | 7    | 14   | 9    | 13   | 5    | 12   | 9    |
| 5755 | 37    | 19   | 13   | 27   | 24   | 20   | 12   | 20   | 21   |
| 5756 | 17    | 7    | 5    | 20   | 9    | 7    | 6    | 13.5 | 19   |
| 5757 | 22    | 9    | 9    | 21   | 10   | 10   | 6    | 14   | 10   |
| 5758 | 36    | 20.5 | 13   | 25.5 | 13   | 22   | 11   | 29   | 22   |
| 5759 | 51    | 16   | 8    | 24   | 10   | 18   | 7    | 18   | 19.5 |
| 5760 | 67    | 50   | 30   | 40   | 21   | 48   | 20   | 45   | 49   |
| 5761 | 84    | 40   | 24   | 37   | 33   | 40   | 14   | 36   | 39   |
| 5762 | 36    | 12   | 9    | 13   | 8    | 11   | 6    | 12   | 26   |
| 5763 | 48    | 31.5 | 13   | 28   | 19   | 37.5 | 12   | 28.5 | 38   |
| 5764 | 44    | 33   | 15   | 30   | 18   | 31   | 12   | 30.5 | 53   |
| 5765 | 20    | 8    | 4.5  | 16   | 8    | 11   | 7    | 11   | 25   |
| 5766 | 52    | 38   | 21   | 51   | 19.5 | 38   | 17.5 | 36   | 40   |
| 5767 | 25    | 13   | 8    | 20   | 11.5 | 15   | 10   | 15   | 17   |
| 5768 | 27    | 12.5 | 10   | 22   | 30   | 13   | 6    | 22   | 23   |
| 5769 | 82    | 52.5 | 23   | 40   | 23   | 53   | 22   | 51   | 53   |
| 5770 | 29    | 8    | 7    | 20   | 10   | 9    | 13   | 18   | 12   |
| 5771 | 26.5  | 14   | 8    | 17   | 8    | 14   | 7    | 16   | 16   |
| 5772 | 50    | 27   | 16   | 33   | 17   | 28.5 | 12   | 31   | 28.5 |
| 5773 | 131.5 | 12   | 9.5  | 18   | 11   | 13   | 7    | 15.5 | 27.5 |
| 5774 | 18    | 10   | 6    | 17   | 17   | 10   | 6    | 12.5 | 6    |
| 5775 | 76    | 67   | 29   | 52   | 28   | 66   | 23.5 | 78   | 59   |
| 5776 | 47    | 28   | 14   | 31   | 26   | 28   | 11   | 30   | 32   |
| 5777 | 50    | 37   | 19   | 35   | 22   | 38   | 17.5 | 38   | 54   |
| 5778 | 49    | 32   | 14   | 31   | 19.5 | 35   | 13   | 28   | 44   |
| 5779 | 57    | 33   | 19   | 41   | 19   | 36   | 13   | 43   | 32   |

|      |       |      |      |       |      |      |      |      |      |
|------|-------|------|------|-------|------|------|------|------|------|
| 5780 | 59.5  | 30   | 15   | 33    | 28   | 33   | 12   | 33   | 34   |
| 5781 | 25    | 9    | 8    | 48    | 13   | 10   | 7    | 30   | 25   |
| 5782 | 29    | 9    | 14   | 20    | 11   | 9    | 8    | 19   | 13   |
| 5783 | 28    | 10   | 7    | 19.5  | 12   | 11   | 7    | 17.5 | 8    |
| 5784 | 26    | 9    | 8    | 20    | 13   | 11.5 | 6    | 39   | 22   |
| 5785 | 27    | 12   | 9    | 20    | 16   | 10   | 7    | 23   | 6    |
| 5786 | 18    | 7    | 6.5  | 26    | 77   | 10   | 6    | 16   | 9    |
| 5787 | 53    | 16   | 19   | 33    | 13   | 19   | 10   | 22   | 25   |
| 5788 | 26    | 12   | 7    | 17    | 11   | 13   | 7.5  | 30   | 2    |
| 5789 | 19    | 11   | 10   | 14    | 12   | 10   | 10   | 33   | 53   |
| 5790 | 23    | 6    | 6    | 9     | 17   | 6    | 26   | 11   | 10   |
| 5791 | 21    | 9    | 8    | 22    | 9    | 9    | 7    | 13   | 18   |
| 5792 | 221.5 | 7    | 7    | 15    | 8    | 7    | 6    | 10   | 7    |
| 5793 | 18    | 5    | 7    | 14.5  | 16   | 5    | 5    | 15   | 9    |
| 5794 | 20    | 7    | 6    | 29    | 12   | 9    | 6    | 13   | 7    |
| 5795 | 19    | 10   | 10   | 12    | 7    | 8    | 9    | 9    | 3    |
| 5796 | 21    | 8    | 9    | 17    | 11   | 11   | 12   | 16   | 15   |
| 5797 | 27    | 9    | 11   | 19    | 13   | 10   | 13   | 25   | 6    |
| 5798 | 20    | 7    | 7    | 8     | 8    | 9    | 6    | 12   | 6    |
| 5799 | 42    | 8.5  | 24   | 15    | 45   | 10   | 22.5 | 12.5 | 6    |
| 5800 | 26    | 8    | 32   | 13    | 407  | 9    | 13   | 11   | 5    |
| 5801 | 109   | 15   | 13   | 18.5  | 43.5 | 11   | 19   | 18   | 26   |
| 5802 | 72.5  | 23.5 | 39   | 86.5  | 89   | 17   | 88   | 71.5 | 48   |
| 5803 | 19    | 7.5  | 7    | 14    | 13   | 8    | 6    | 16   | 6    |
| 5804 | 18    | 7    | 6    | 14    | 8    | 9    | 6.5  | 11   | 12   |
| 5805 | 453   | 9    | 10   | 12    | 9    | 14   | 5.5  | 14   | 3    |
| 5806 | 16    | 6    | 5    | 8     | 8    | 8    | 6    | 8    | 2    |
| 5807 | 44    | 32   | 32.5 | 35    | 43   | 26   | 44   | 125  | 10   |
| 5808 | 26    | 17   | 15   | 14.5  | 18   | 18   | 12   | 22   | 6    |
| 5809 | 66    | 52   | 21   | 23    | 21   | 23   | 39   | 40   | 11   |
| 5810 | 24    | 18   | 12   | 19    | 17   | 19   | 10   | 56   | 7    |
| 5811 | 26    | 19   | 12   | 16    | 22   | 22   | 9    | 40   | 5    |
| 5812 | 32    | 15   | 8    | 15.5  | 13   | 19   | 10   | 18   | 3    |
| 5813 | 53    | 56.5 | 30   | 122   | 37   | 57   | 14   | 41   | 77.5 |
| 5814 | 55.5  | 23   | 16   | 21    | 20   | 21   | 11   | 35   | 12   |
| 5815 | 52.5  | 59   | 28   | 130   | 85   | 60   | 15   | 40   | 55   |
| 5816 | 39    | 27   | 19   | 27    | 37   | 27   | 19   | 92.5 | 6    |
| 5817 | 76    | 91.5 | 32.5 | 155.5 | 44.5 | 77   | 25   | 56   | 84   |
| 5818 | 24    | 80   | 19   | 51    | 18   | 19   | 10   | 37   | 26   |
| 5819 | 53.5  | 59   | 34   | 134   | 33   | 63   | 16   | 40   | 73   |
| 5820 | 16    | 11   | 8    | 14    | 11   | 15   | 7    | 21.5 | 5    |
| 5821 | 64    | 58   | 29   | 137   | 33   | 61   | 11   | 41   | 90   |
| 5822 | 25.5  | 18   | 32   | 17    | 16   | 19   | 11   | 28.5 | 10   |
| 5823 | 54    | 58   | 29.5 | 139.5 | 33   | 65   | 17   | 38   | 53   |
| 5824 | 67    | 46   | 28   | 176   | 47   | 55.5 | 12   | 41   | 39   |
| 5825 | 21    | 15   | 8.5  | 27    | 15   | 16   | 9    | 18   | 24   |
| 5826 | 54    | 50   | 34.5 | 142.5 | 29   | 56   | 11   | 38   | 48   |

|      |      |      |      |       |      |      |      |      |      |
|------|------|------|------|-------|------|------|------|------|------|
| 5827 | 23   | 15   | 15   | 23    | 19   | 17   | 10   | 24   | 40   |
| 5828 | 75   | 104  | 42   | 166   | 56   | 78   | 33   | 58.5 | 89   |
| 5829 | 19   | 13   | 10   | 14    | 12   | 16   | 36   | 16   | 5    |
| 5830 | 58.5 | 41   | 30   | 135   | 28   | 53   | 13   | 38   | 76   |
| 5831 | 18   | 14   | 9    | 16    | 12   | 14   | 7    | 21   | 6    |
| 5832 | 79.5 | 63.5 | 41   | 305.5 | 64   | 86.5 | 23.5 | 50   | 71   |
| 5833 | 24   | 18   | 14   | 36    | 23   | 16   | 15   | 60.5 | 8.5  |
| 5834 | 48   | 52   | 36   | 132.5 | 48   | 55   | 15   | 39   | 86.5 |
| 5835 | 17   | 13   | 7    | 15    | 9    | 15   | 6    | 16   | 9    |
| 5836 | 71   | 72   | 40   | 174   | 34   | 68.5 | 21   | 48   | 92   |
| 5837 | 32.5 | 20   | 13   | 25    | 24.5 | 17   | 19   | 55.5 | 223  |
| 5838 | 57.5 | 51   | 35   | 147   | 43.5 | 64   | 15   | 40   | 65   |
| 5839 | 23   | 14   | 8    | 14    | 18   | 16   | 16.5 | 17   | 5    |
| 5840 | 77   | 78   | 39   | 167.5 | 37   | 71   | 22   | 50.5 | 84   |
| 5841 | 31   | 16.5 | 16.5 | 29    | 140  | 18.5 | 24.5 | 30   | 42   |
| 5842 | 62   | 52   | 35   | 144.5 | 75   | 53   | 15   | 36.5 | 67   |
| 5843 | 44   | 24   | 27   | 46    | 53.5 | 19   | 22   | 112  | 54   |
| 5844 | 53   | 42   | 32   | 144   | 26   | 59.5 | 13   | 36   | 52   |
| 5845 | 60.5 | 20   | 21   | 38    | 114  | 18   | 14   | 66   | 67   |
| 5846 | 70   | 62   | 37   | 179   | 69   | 62.5 | 20   | 51   | 79.5 |
| 5847 | 41   | 18   | 16   | 28    | 69   | 18   | 20   | 40   | 27   |
| 5848 | 66.5 | 73   | 35   | 176.5 | 44   | 70   | 22   | 53   | 69   |
| 5849 | 58   | 62   | 34   | 146.5 | 32   | 58   | 26   | 41   | 83   |
| 5850 | 45   | 17   | 17   | 17    | 63.5 | 16   | 14   | 28.5 | 11   |
| 5851 | 64.5 | 54   | 25   | 118   | 26   | 75   | 14   | 42.5 | 64   |
| 5852 | 60   | 26.5 | 22.5 | 54    | 71.5 | 28   | 26   | 72   | 31.5 |
| 5853 | 56.5 | 51   | 30   | 140   | 36   | 54   | 16   | 40   | 174  |
| 5854 | 52   | 32   | 23   | 42    | 39   | 26   | 21   | 88   | 18   |
| 5855 | 52   | 41   | 24   | 130.5 | 51   | 50   | 11   | 32.5 | 115  |
| 5856 | 23   | 18.5 | 9    | 15.5  | 77   | 18   | 13.5 | 18.5 | 8    |
| 5857 | 54.5 | 31.5 | 26   | 43    | 45   | 19   | 36   | 119  | 27   |
| 5858 | 65   | 73   | 33   | 158   | 47   | 65.5 | 25   | 46   | 67   |
| 5859 | 27   | 18   | 14   | 31    | 23   | 17   | 12   | 27.5 | 13   |
| 5860 | 34   | 23   | 13   | 29    | 23   | 28   | 13   | 29   | 11   |
| 5861 | 97   | 74   | 47   | 157.5 | 45   | 87   | 29   | 89   | 111  |
| 5862 | 53.5 | 60   | 31   | 148   | 26   | 59   | 16   | 36   | 134  |
| 5863 | 40   | 23   | 16   | 27    | 24   | 23   | 13   | 50.5 | 18   |
| 5864 | 56   | 22   | 17   | 25    | 21   | 24   | 21   | 80   | 66   |
| 5865 | 48   | 54   | 28   | 115   | 29   | 56   | 13   | 37   | 72   |
| 5866 | 40   | 24   | 22   | 24    | 36   | 23   | 29   | 51   | 9.5  |
| 5867 | 79.5 | 52   | 45   | 161.5 | 53   | 61   | 17   | 69   | 128  |
| 5868 | 45   | 20   | 17   | 22.5  | 16   | 21   | 13   | 40   | 35   |
| 5869 | 61   | 73   | 35.5 | 139   | 32   | 62   | 21   | 49   | 73   |
| 5870 | 109  | 53.5 | 32.5 | 48    | 32   | 49   | 25   | 123  | 39   |
| 5871 | 55   | 62.5 | 33   | 154   | 31   | 61   | 18   | 40   | 127  |
| 5872 | 65   | 38.5 | 19   | 37    | 27   | 39   | 17   | 59.5 | 54   |
| 5873 | 59   | 56   | 28   | 146.5 | 34   | 68   | 19   | 41   | 47   |

|      |       |      |      |       |      |      |      |       |       |
|------|-------|------|------|-------|------|------|------|-------|-------|
| 5874 | 83    | 36   | 31   | 39    | 25.5 | 29   | 17   | 111.5 | 25    |
| 5875 | 48    | 48   | 29   | 118.5 | 34   | 49   | 11   | 33    | 103   |
| 5876 | 111.5 | 91.5 | 47.5 | 62    | 62   | 86.5 | 33   | 96.5  | 98    |
| 5877 | 56    | 68   | 29   | 162.5 | 54.5 | 63   | 18   | 48    | 69    |
| 5878 | 53    | 33   | 24   | 35    | 25   | 36   | 18   | 60    | 33    |
| 5879 | 47    | 49   | 28   | 165.5 | 30   | 57   | 11   | 41    | 52    |
| 5880 | 61    | 19   | 13   | 23    | 20   | 19   | 12   | 42.5  | 28    |
| 5881 | 99    | 84   | 69   | 180   | 39   | 94   | 21   | 49.5  | 106   |
| 5882 | 46.5  | 35   | 27   | 117   | 24   | 46   | 9    | 30    | 44    |
| 5883 | 48    | 28.5 | 19   | 30    | 21   | 25   | 19   | 54    | 27    |
| 5884 | 54    | 40   | 28   | 131   | 29   | 45   | 9    | 36    | 87    |
| 5885 | 44    | 27   | 30   | 32    | 28   | 27   | 15.5 | 92    | 29    |
| 5886 | 68    | 65   | 38.5 | 172   | 36   | 59.5 | 18   | 45    | 49    |
| 5887 | 49    | 21.5 | 14   | 30    | 19   | 22   | 11   | 50.5  | 30    |
| 5888 | 63    | 53   | 31   | 167   | 39   | 45   | 22.5 | 38.5  | 76    |
| 5889 | 51    | 24.5 | 24   | 25.5  | 21   | 24   | 13   | 44    | 13    |
| 5890 | 48    | 39   | 30   | 149   | 60.5 | 50   | 12   | 41.5  | 123   |
| 5891 | 55    | 53.5 | 33   | 170.5 | 31   | 57   | 16   | 73    | 52    |
| 5892 | 86    | 73   | 33   | 155   | 36   | 97   | 20   | 42    | 68.5  |
| 5893 | 35.5  | 22   | 17   | 26    | 17   | 20   | 14   | 75    | 23.5  |
| 5894 | 67    | 20.5 | 14   | 26.5  | 23.5 | 21   | 14   | 64    | 17    |
| 5895 | 55    | 49   | 31   | 135   | 31   | 54.5 | 25   | 45    | 59.5  |
| 5896 | 49    | 36   | 21.5 | 31    | 23.5 | 32   | 16   | 53.5  | 38    |
| 5897 | 52.5  | 60   | 33   | 144.5 | 30   | 57   | 19   | 42    | 72.5  |
| 5898 | 100   | 64   | 39   | 50    | 34   | 64   | 28   | 78.5  | 75    |
| 5899 | 63    | 61   | 31   | 175   | 39.5 | 60   | 18   | 41    | 105.5 |
| 5900 | 64.5  | 36   | 23   | 32    | 23   | 32   | 18.5 | 70.5  | 49    |
| 5901 | 59    | 37   | 25   | 126   | 28   | 48   | 14   | 32    | 63.5  |
| 5902 | 62    | 20   | 17   | 22    | 23   | 20   | 17   | 36.5  | 46    |
| 5903 | 109   | 39   | 46   | 128.5 | 23   | 47   | 11   | 33    | 50    |
| 5904 | 56    | 23.5 | 15   | 25    | 24   | 22   | 11   | 48.5  | 23    |
| 5905 | 44.5  | 43   | 24   | 123   | 26   | 46   | 10   | 32    | 87    |
| 5906 | 72    | 55   | 24   | 40    | 25   | 46   | 26.5 | 60    | 60    |
| 5907 | 58.5  | 74.5 | 29   | 145.5 | 34   | 67   | 19   | 43    | 70    |
| 5908 | 60    | 49   | 34   | 126.5 | 31   | 57.5 | 11   | 44    | 77    |
| 5909 | 39    | 20   | 15   | 26    | 18   | 20   | 12   | 51    | 22    |
| 5910 | 58    | 36   | 21   | 34    | 40   | 32   | 16   | 42.5  | 48    |
| 5911 | 68    | 87   | 38.5 | 169.5 | 42   | 79   | 29   | 47    | 85    |
| 5912 | 47    | 30   | 31   | 37    | 29   | 29   | 24   | 154   | 51    |
| 5913 | 38    | 21   | 16   | 29    | 34   | 21   | 13   | 48    | 69    |
| 5914 | 50    | 44   | 24   | 124   | 22   | 45.5 | 13   | 32    | 49    |
| 5915 | 46    | 23   | 16   | 27    | 20   | 21.5 | 14   | 46    | 102.5 |
| 5916 | 51    | 43.5 | 29   | 140.5 | 23   | 51   | 12   | 34.5  | 43    |
| 5917 | 104.5 | 24   | 25   | 64    | 23   | 23   | 20   | 56    | 27    |
| 5918 | 34    | 34   | 18   | 93    | 17   | 45   | 7    | 29.5  | 42    |
| 5919 | 107   | 44   | 23   | 37    | 34   | 40.5 | 19   | 82.5  | 46    |
| 5920 | 33    | 31   | 20.5 | 92    | 27   | 43.5 | 7    | 27    | 28    |



|      |       |      |      |       |       |       |       |       |       |
|------|-------|------|------|-------|-------|-------|-------|-------|-------|
| 5921 | 50    | 34   | 23   | 42    | 55    | 28    | 16    | 98.5  | 33    |
| 5922 | 33    | 26   | 19   | 88    | 18    | 35    | 11    | 19    | 24    |
| 5923 | 34    | 15   | 15   | 21    | 18    | 16    | 12    | 61    | 31    |
| 5924 | 40    | 29   | 21   | 77    | 24    | 38    | 22    | 33    | 44    |
| 5925 | 119.5 | 67   | 35   | 52.5  | 35    | 69    | 26    | 90    | 80    |
| 5926 | 33.5  | 33.5 | 19   | 78.5  | 17    | 45    | 6     | 27    | 31    |
| 5927 | 55    | 32   | 16   | 37    | 27    | 28    | 22    | 61.5  | 38    |
| 5928 | 53    | 34   | 23   | 86.5  | 19    | 46    | 34    | 31.5  | 32    |
| 5929 | 30    | 17   | 12   | 21.5  | 15    | 17    | 9     | 31.5  | 35.5  |
| 5930 | 60    | 19   | 14   | 26    | 38    | 22    | 12.5  | 43.5  | 29    |
| 5931 | 66    | 40   | 27   | 87    | 20.5  | 49    | 12    | 35    | 58    |
| 5932 | 56    | 36   | 28   | 38    | 20    | 30    | 16    | 65.5  | 28    |
| 5933 | 347.5 | 182  | 28.5 | 143   | 29    | 258.5 | 13    | 83    | 111   |
| 5934 | 42    | 43   | 11   | 23    | 12    | 18    | 10    | 37    | 36    |
| 5935 | 109   | 50   | 62   | 139.5 | 99    | 50    | 21    | 43    | 48    |
| 5936 | 61.5  | 45   | 30   | 184   | 32.5  | 65    | 14    | 43    | 63    |
| 5937 | 42    | 19   | 20   | 24    | 19    | 18    | 12    | 48    | 42    |
| 5938 | 53.5  | 34   | 26   | 82    | 28    | 43    | 18    | 32    | 30    |
| 5939 | 64    | 39   | 28   | 137   | 41    | 43    | 19    | 35.5  | 173.5 |
| 5940 | 59    | 31   | 18   | 30    | 28    | 29    | 16    | 46.5  | 43    |
| 5941 | 48    | 35   | 22   | 85    | 76    | 45    | 9     | 26    | 40    |
| 5942 | 38    | 24   | 18.5 | 25    | 16    | 21    | 14    | 43.5  | 38.5  |
| 5943 | 43    | 28   | 25.5 | 152   | 18    | 36.5  | 15    | 36    | 32    |
| 5944 | 43    | 22.5 | 15   | 24    | 18    | 18    | 11    | 40.5  | 40.5  |
| 5945 | 90.5  | 43   | 36   | 346   | 32    | 52    | 15    | 91.5  | 36    |
| 5946 | 35    | 18   | 11   | 19    | 18    | 16    | 10    | 39    | 67    |
| 5947 | 57    | 42   | 31.5 | 190   | 22.5  | 50    | 25    | 55.5  | 41    |
| 5948 | 51    | 29   | 17   | 32    | 18    | 27.5  | 15.5  | 42    | 58    |
| 5949 | 146.5 | 41   | 34   | 213   | 20    | 50    | 18    | 142.5 | 37    |
| 5950 | 85.5  | 46   | 17.5 | 39    | 23    | 46    | 18    | 46    | 69    |
| 5951 | 70    | 41   | 69.5 | 236   | 43.5  | 50    | 179   | 127   | 61.5  |
| 5952 | 46    | 39   | 15   | 28    | 17    | 21    | 11    | 37    | 62.5  |
| 5953 | 54    | 34   | 47.5 | 316   | 18    | 47    | 18    | 107   | 44    |
| 5954 | 42    | 19   | 12   | 30    | 17    | 20    | 12    | 28    | 18    |
| 5955 | 85    | 81   | 40   | 329.5 | 36    | 62    | 39    | 240   | 82    |
| 5956 | 46    | 20   | 13   | 25    | 21    | 18    | 10    | 31.5  | 20.5  |
| 5957 | 46    | 37   | 27   | 141.5 | 28    | 47.5  | 332   | 43    | 50    |
| 5958 | 39.5  | 18   | 12   | 28    | 26    | 17    | 12    | 28.5  | 17    |
| 5959 | 90    | 46   | 33   | 132   | 30    | 126   | 15.5  | 47    | 119   |
| 5960 | 35    | 16   | 13   | 28    | 13    | 16    | 9     | 28.5  | 38    |
| 5961 | 214   | 531  | 73   | 590.5 | 173   | 220   | 138.5 | 167   | 274   |
| 5962 | 46    | 22   | 11   | 26    | 22    | 24    | 11    | 33    | 32    |
| 5963 | 272   | 58   | 58   | 403.5 | 75    | 67    | 49    | 157.5 | 99    |
| 5964 | 95    | 52   | 24   | 47    | 27    | 51    | 21    | 69    | 50    |
| 5965 | 59    | 40   | 27.5 | 143   | 21    | 53    | 22    | 41    | 57    |
| 5966 | 31    | 19   | 11   | 25    | 17.5  | 17    | 12    | 29    | 73.5  |
| 5967 | 45    | 39   | 29   | 146.5 | 457.5 | 53    | 11.5  | 53.5  | 71    |

|      |      |      |      |       |      |      |      |      |      |
|------|------|------|------|-------|------|------|------|------|------|
| 5968 | 49   | 27.5 | 14   | 30    | 21   | 24   | 13   | 35   | 46   |
| 5969 | 62   | 37   | 33   | 143   | 74.5 | 45   | 10   | 40   | 53   |
| 5970 | 76   | 47   | 23   | 39    | 36   | 44   | 22   | 50   | 56   |
| 5971 | 40   | 35.5 | 23   | 96.5  | 24   | 43   | 7    | 26   | 30.5 |
| 5972 | 46   | 22   | 14   | 30.5  | 23   | 18   | 12   | 39   | 31   |
| 5973 | 48   | 39   | 29   | 168   | 33   | 48.5 | 8    | 87.5 | 65.5 |
| 5974 | 90   | 61   | 31   | 48    | 28   | 52   | 25   | 55.5 | 58   |
| 5975 | 38   | 29.5 | 21   | 136   | 2397 | 40   | 33   | 31.5 | 33   |
| 5976 | 129  | 79   | 38   | 52    | 32   | 70   | 29   | 74.5 | 70   |
| 5977 | 42   | 35   | 26   | 135   | 50   | 39   | 12   | 50   | 44   |
| 5978 | 35   | 14   | 10   | 29    | 11   | 13   | 9.5  | 32.5 | 22   |
| 5979 | 48.5 | 54   | 26   | 166   | 20   | 50.5 | 12   | 36   | 62   |
| 5980 | 33   | 13   | 11   | 17    | 11   | 12   | 14   | 29.5 | 6    |
| 5981 | 47.5 | 53   | 19   | 125.5 | 25   | 55   | 12   | 30   | 100  |
| 5982 | 36   | 16   | 11   | 31.5  | 13.5 | 15.5 | 13   | 30   | 24   |
| 5983 | 71   | 50   | 24   | 92    | 20   | 50   | 12   | 38   | 54   |
| 5984 | 34   | 20   | 14   | 29    | 20   | 16   | 19   | 61.5 | 20   |
| 5985 | 37   | 31   | 26   | 118   | 19   | 41.5 | 35.5 | 28   | 45   |
| 5986 | 28   | 12   | 9    | 27    | 10   | 11   | 12   | 23   | 6    |
| 5987 | 68   | 58   | 33   | 161.5 | 31   | 67   | 16   | 62   | 120  |
| 5988 | 33   | 16.5 | 19   | 20.5  | 14   | 14   | 13   | 38   | 43   |
| 5989 | 62   | 46   | 39   | 269.5 | 55.5 | 52   | 29   | 75   | 214  |
| 5990 | 32   | 16   | 16   | 29    | 42   | 15   | 19   | 69   | 9    |
| 5991 | 32   | 14   | 12   | 28    | 8.5  | 14   | 11   | 29   | 7    |
| 5992 | 38.5 | 39   | 24   | 119   | 18.5 | 46   | 9    | 28   | 92   |
| 5993 | 33   | 17   | 18   | 29    | 111  | 14   | 58.5 | 30   | 15   |
| 5994 | 380  | 37   | 29   | 176   | 34   | 44   | 17   | 45   | 113  |
| 5995 | 52.5 | 16   | 22   | 24    | 17   | 15   | 186  | 33   | 23   |
| 5996 | 48   | 39   | 31   | 161   | 98   | 49   | 11   | 60   | 105  |
| 5997 | 46   | 19   | 13   | 19    | 15   | 18   | 14   | 45.5 | 14   |
| 5998 | 38   | 26   | 21   | 91    | 16   | 36   | 9    | 23   | 29   |
| 5999 | 58.5 | 23.5 | 28   | 30    | 29.5 | 19   | 34   | 46   | 27   |
| 6000 | 36.5 | 30   | 17.5 | 78    | 16   | 40   | 6    | 24   | 26   |
| 6001 | 41.5 | 15.5 | 14   | 16    | 88   | 15   | 9    | 25   | 13   |
| 6002 | 37   | 31   | 19   | 112   | 20   | 42   | 11   | 23   | 34   |
| 6003 | 67   | 18   | 37.5 | 27    | 19   | 17   | 18.5 | 96   | 62   |
| 6004 | 32   | 28.5 | 17   | 58    | 17   | 40.5 | 6    | 23   | 24   |
| 6005 | 74.5 | 22   | 12   | 23    | 22   | 16   | 12   | 42.5 | 40   |
| 6006 | 30.5 | 30   | 17   | 57    | 49.5 | 39   | 6    | 20   | 26.5 |
| 6007 | 28.5 | 28   | 16   | 75    | 13   | 39   | 7    | 20   | 33   |
| 6008 | 47   | 19   | 13   | 16    | 15   | 18   | 13   | 33   | 8    |
| 6009 | 63   | 31   | 21   | 100   | 20   | 39.5 | 8    | 26   | 34   |
| 6010 | 28.5 | 18   | 12.5 | 18    | 14   | 15   | 12.5 | 59   | 6    |
| 6011 | 33   | 31   | 16   | 54    | 16   | 38.5 | 17   | 21   | 24   |
| 6012 | 46   | 14   | 10   | 19    | 13   | 16   | 13   | 32.5 | 13   |
| 6013 | 36.5 | 37   | 17   | 93    | 19   | 43   | 10   | 25   | 38   |
| 6014 | 23   | 14   | 10   | 14    | 17   | 12   | 9    | 32.5 | 4    |

|      |       |      |      |       |      |       |    |      |       |
|------|-------|------|------|-------|------|-------|----|------|-------|
| 6015 | 44    | 35   | 27   | 203   | 26   | 47    | 11 | 33.5 | 93    |
| 6016 | 24    | 14   | 11   | 16    | 10   | 13.5  | 8  | 26.5 | 9     |
| 6017 | 51    | 37   | 22   | 74    | 142  | 59    | 10 | 28   | 54    |
| 6018 | 90    | 14   | 15   | 19    | 14   | 14    | 15 | 38.5 | 5     |
| 6019 | 42    | 25   | 21   | 137   | 75.5 | 40    | 15 | 31.5 | 83.5  |
| 6020 | 32    | 18   | 13   | 20.5  | 15   | 14    | 17 | 54.5 | 15    |
| 6021 | 57    | 41   | 34   | 167   | 49   | 51    | 17 | 68   | 72    |
| 6022 | 362   | 28   | 23   | 33    | 24   | 23    | 28 | 176  | 10    |
| 6023 | 47.5  | 38   | 23   | 162   | 22   | 53    | 22 | 37   | 69.5  |
| 6024 | 108   | 31   | 18   | 94    | 16   | 44    | 8  | 27   | 28    |
| 6025 | 85    | 18   | 28   | 30    | 22   | 14    | 24 | 79.5 | 10.5  |
| 6026 | 31    | 21.5 | 19   | 67    | 54.5 | 31    | 6  | 22   | 22    |
| 6027 | 26    | 12   | 18   | 15    | 14   | 11.5  | 8  | 32   | 8     |
| 6028 | 39    | 31   | 24.5 | 140   | 21   | 39    | 10 | 26   | 26    |
| 6029 | 58    | 30   | 21   | 89    | 19   | 39    | 10 | 37.5 | 31    |
| 6030 | 34    | 20   | 13   | 18    | 14   | 15    | 13 | 34   | 37    |
| 6031 | 58    | 18   | 20.5 | 35    | 32.5 | 16    | 36 | 31   | 169   |
| 6032 | 40    | 35   | 21   | 148   | 17   | 41.5  | 11 | 25   | 41    |
| 6033 | 234.5 | 27   | 21   | 41    | 25   | 18    | 21 | 76   | 159   |
| 6034 | 46    | 49   | 25   | 144   | 26   | 47    | 21 | 46.5 | 41    |
| 6035 | 51    | 26   | 12   | 19    | 11   | 10    | 11 | 33.5 | 7     |
| 6036 | 50    | 34   | 22   | 128   | 65.5 | 48.5  | 37 | 26   | 49    |
| 6037 | 48    | 9    | 49.5 | 14    | 7.5  | 9     | 7  | 19   | 5     |
| 6038 | 48    | 34   | 33   | 120   | 62   | 44    | 28 | 38   | 69    |
| 6039 | 50    | 29.5 | 15   | 29    | 21   | 28    | 16 | 43   | 41.5  |
| 6040 | 78    | 30   | 28   | 99    | 34   | 32    | 22 | 47.5 | 98    |
| 6041 | 42    | 21   | 18   | 20    | 17   | 20    | 11 | 31.5 | 22    |
| 6042 | 59.5  | 31   | 25   | 87    | 29   | 43    | 12 | 54   | 50    |
| 6043 | 47    | 20   | 13   | 22    | 18   | 16    | 28 | 34.5 | 22    |
| 6044 | 190   | 35   | 19   | 68.5  | 22.5 | 65    | 12 | 29   | 40    |
| 6045 | 63    | 47   | 25   | 86.5  | 46   | 49.5  | 15 | 36   | 39    |
| 6046 | 38    | 22   | 16   | 25    | 31.5 | 22    | 14 | 34.5 | 25.5  |
| 6047 | 59    | 63   | 25   | 131   | 23   | 60.5  | 17 | 31   | 65    |
| 6048 | 58    | 18   | 16   | 23    | 21   | 16    | 13 | 33.5 | 30    |
| 6049 | 36    | 30   | 21   | 98    | 24   | 36    | 7  | 33   | 45.5  |
| 6050 | 66    | 50   | 30   | 41.5  | 24   | 46    | 25 | 64   | 62    |
| 6051 | 189   | 46   | 38   | 210.5 | 29   | 118.5 | 13 | 80.5 | 133.5 |
| 6052 | 27    | 13   | 27   | 20    | 17   | 11    | 9  | 33   | 11    |
| 6053 | 63    | 30   | 18   | 70    | 24.5 | 38    | 9  | 24   | 57.5  |
| 6054 | 27    | 27   | 14   | 50.5  | 11   | 35    | 5  | 17   | 21    |
| 6055 | 28    | 11   | 9    | 17    | 28   | 11    | 8  | 24.5 | 13    |
| 6056 | 32    | 26   | 17   | 48    | 25.5 | 33    | 6  | 20   | 24    |
| 6057 | 103   | 32   | 21   | 28    | 25   | 31    | 24 | 42   | 42    |
| 6058 | 40    | 34   | 27.5 | 95.5  | 19   | 42    | 9  | 45   | 32    |
| 6059 | 51.5  | 27.5 | 16   | 29    | 22   | 26    | 16 | 43.5 | 40    |
| 6060 | 47.5  | 42   | 23   | 130   | 20   | 48    | 11 | 30   | 45    |
| 6061 | 40.5  | 24   | 14   | 25.5  | 16   | 20    | 13 | 38.5 | 40    |

|      |      |       |      |       |      |       |      |      |      |
|------|------|-------|------|-------|------|-------|------|------|------|
| 6062 | 46   | 53.5  | 25   | 125.5 | 46.5 | 52    | 18   | 36   | 100  |
| 6063 | 31   | 18.5  | 8.5  | 21    | 15   | 16    | 8.5  | 30   | 22   |
| 6064 | 44   | 34    | 23   | 126   | 23   | 37    | 11   | 30   | 50   |
| 6065 | 37   | 17    | 14   | 30.5  | 14   | 15    | 16   | 35   | 27   |
| 6066 | 47   | 37    | 26   | 137   | 81.5 | 47    | 12   | 36   | 42   |
| 6067 | 59   | 49.5  | 27   | 120.5 | 26   | 64    | 13.5 | 30.5 | 61   |
| 6068 | 27   | 14    | 11.5 | 21    | 11   | 11    | 9    | 40   | 30.5 |
| 6069 | 40   | 36    | 23.5 | 108   | 31   | 41    | 9    | 27   | 37   |
| 6070 | 34   | 14    | 11   | 19    | 11   | 14.5  | 10   | 26   | 34   |
| 6071 | 54   | 51    | 26   | 122   | 25   | 61    | 17   | 33   | 99   |
| 6072 | 36   | 11    | 12   | 17    | 13   | 11    | 10.5 | 26   | 14   |
| 6073 | 53   | 34    | 20.5 | 100   | 24   | 43    | 8    | 28.5 | 58   |
| 6074 | 66   | 13    | 11   | 21    | 15   | 12    | 10   | 23   | 23   |
| 6075 | 39.5 | 32    | 32   | 111.5 | 22   | 40    | 8    | 31   | 51   |
| 6076 | 90   | 24    | 19   | 33.5  | 97   | 20    | 19   | 60   | 18   |
| 6077 | 49   | 21    | 16   | 25    | 18   | 16    | 16   | 120  | 12   |
| 6078 | 48   | 38    | 26   | 155.5 | 51   | 39    | 12.5 | 36   | 60   |
| 6079 | 62.5 | 35.5  | 16   | 32    | 22   | 32    | 24   | 44   | 70   |
| 6080 | 77.5 | 55    | 27.5 | 139   | 26   | 87    | 15   | 40.5 | 54   |
| 6081 | 42   | 13    | 13.5 | 19    | 13   | 10    | 9    | 22.5 | 16   |
| 6082 | 53   | 68.5  | 25   | 147   | 30   | 69.5  | 15   | 45   | 53   |
| 6083 | 27   | 10    | 12   | 17    | 14   | 11    | 8    | 23   | 12   |
| 6084 | 67   | 66    | 26   | 163   | 29.5 | 102   | 19.5 | 61   | 63   |
| 6085 | 30.5 | 14    | 23   | 18    | 18   | 10    | 10   | 28   | 28   |
| 6086 | 30   | 12.5  | 10.5 | 18.5  | 17   | 13.5  | 9    | 24   | 20   |
| 6087 | 36   | 34    | 20   | 89    | 20   | 36.5  | 8    | 25   | 45   |
| 6088 | 36.5 | 19    | 9    | 18.5  | 12   | 19    | 11   | 28   | 40   |
| 6089 | 41   | 15    | 14   | 18    | 18   | 12    | 11   | 37   | 17   |
| 6090 | 61.5 | 35    | 24   | 144   | 29   | 51    | 10   | 34   | 51   |
| 6091 | 35   | 12    | 11   | 18    | 13   | 11    | 11   | 25.5 | 13   |
| 6092 | 39   | 14.5  | 12   | 17    | 15.5 | 12    | 21   | 21   | 22   |
| 6093 | 24   | 9     | 11   | 16    | 13   | 9     | 8    | 23   | 13   |
| 6094 | 26   | 10    | 9    | 16    | 10   | 11    | 14   | 21   | 12.5 |
| 6095 | 41   | 44    | 23   | 141   | 26   | 41    | 12   | 32   | 38   |
| 6096 | 33   | 9     | 12   | 16    | 11   | 9.5   | 9.5  | 19   | 13   |
| 6097 | 57   | 46    | 21   | 138.5 | 75   | 51    | 27   | 34   | 56   |
| 6098 | 25   | 14    | 10   | 20    | 10   | 11    | 9    | 32.5 | 14   |
| 6099 | 46.5 | 35    | 25   | 154.5 | 24   | 41.5  | 10   | 30   | 79   |
| 6100 | 29   | 14    | 10   | 21    | 11   | 10.5  | 10   | 32   | 24   |
| 6101 | 46   | 35    | 19   | 27    | 17   | 32    | 14   | 44   | 27   |
| 6102 | 61   | 59    | 29   | 148   | 31   | 74    | 12   | 40   | 74.5 |
| 6103 | 32   | 11    | 15   | 16    | 14   | 11    | 20   | 22   | 19   |
| 6104 | 41   | 47    | 30   | 122   | 20   | 44.5  | 14   | 28   | 52   |
| 6105 | 37   | 14    | 12   | 22    | 18   | 13    | 11   | 22   | 45   |
| 6106 | 44   | 42    | 23   | 132   | 23   | 43    | 21   | 31   | 47   |
| 6107 | 901  | 180.5 | 24   | 30    | 24   | 155.5 | 14   | 62   | 38   |
| 6108 | 55   | 37    | 24   | 139   | 29   | 40    | 12   | 31.5 | 67.5 |

|      |       |       |      |       |      |      |      |      |      |
|------|-------|-------|------|-------|------|------|------|------|------|
| 6109 | 51.5  | 17    | 21   | 53.5  | 57   | 14.5 | 16   | 36   | 29   |
| 6110 | 105.5 | 43    | 25   | 121   | 19   | 71   | 9    | 31.5 | 49   |
| 6111 | 32    | 15.5  | 13   | 23    | 24   | 12   | 19   | 52.5 | 38   |
| 6112 | 46    | 32    | 25   | 119   | 19   | 41   | 11   | 36   | 46   |
| 6113 | 47    | 23.5  | 12   | 20.5  | 17   | 15   | 12   | 32   | 37   |
| 6114 | 118.5 | 31    | 21   | 99    | 21   | 41   | 10   | 25.5 | 74   |
| 6115 | 43    | 17    | 11   | 32    | 12   | 17   | 11   | 34   | 18   |
| 6116 | 95    | 40    | 28   | 135.5 | 24.5 | 46   | 14   | 36   | 39   |
| 6117 | 40    | 36    | 21   | 112   | 29   | 41   | 10   | 35   | 97.5 |
| 6118 | 26    | 13.5  | 11   | 21    | 14   | 11   | 12   | 27   | 21   |
| 6119 | 68.5  | 51    | 22.5 | 158   | 22   | 65.5 | 12   | 37   | 79   |
| 6120 | 43    | 12    | 15   | 25    | 232  | 13   | 11   | 25   | 24   |
| 6121 | 68    | 63    | 34   | 167.5 | 27.5 | 62   | 20   | 43   | 117  |
| 6122 | 34.5  | 15    | 12   | 18    | 17   | 10   | 14   | 25   | 28.5 |
| 6123 | 55.5  | 65    | 25   | 158   | 39   | 52   | 20   | 40   | 60   |
| 6124 | 27    | 18    | 16   | 21    | 14   | 11   | 19   | 59.5 | 19   |
| 6125 | 73    | 55    | 32   | 135   | 40   | 60   | 24   | 57   | 62.5 |
| 6126 | 78    | 58    | 29   | 46    | 32   | 53.5 | 26.5 | 91.5 | 54   |
| 6127 | 214.5 | 101.5 | 31   | 136   | 19.5 | 513  | 8    | 144  | 110  |
| 6128 | 47    | 31    | 18   | 29.5  | 20   | 28.5 | 15.5 | 39   | 37   |
| 6129 | 43    | 50    | 22   | 128   | 23   | 52   | 14   | 34   | 68   |
| 6130 | 24    | 12    | 11   | 18    | 12   | 11   | 8    | 29   | 100  |
| 6131 | 63    | 92    | 27   | 185   | 39   | 64   | 30   | 61   | 71   |
| 6132 | 24    | 10    | 9    | 17    | 12   | 9    | 8    | 25   | 19   |
| 6133 | 39.5  | 23    | 12   | 30    | 27   | 16.5 | 13.5 | 52   | 52   |
| 6134 | 40    | 36    | 33   | 92    | 15   | 44   | 10   | 27   | 34   |
| 6135 | 55    | 77    | 35   | 186   | 50   | 58   | 25.5 | 49   | 84   |
| 6136 | 64    | 41    | 32   | 140   | 39   | 52   | 15   | 60   | 49.5 |
| 6137 | 52    | 57    | 32   | 155   | 30   | 52   | 18   | 37   | 79   |
| 6138 | 43    | 35.5  | 16   | 28    | 22.5 | 25   | 15   | 42   | 33   |
| 6139 | 47.5  | 44.5  | 32   | 176.5 | 28   | 59   | 14   | 70   | 51   |
| 6140 | 64    | 59    | 26   | 250   | 30   | 54   | 20   | 46   | 56   |
| 6141 | 62    | 37    | 23   | 35.5  | 24   | 37   | 18   | 47   | 61   |
| 6142 | 64    | 63    | 28   | 140   | 31   | 55.5 | 23   | 49   | 64   |
| 6143 | 59    | 37    | 21   | 28.5  | 18   | 39   | 16   | 49.5 | 40   |
| 6144 | 59.5  | 73    | 27   | 169   | 33   | 68   | 23   | 44.5 | 85   |
| 6145 | 31.5  | 14    | 11   | 18    | 10   | 13.5 | 7    | 25   | 35   |
| 6146 | 25    | 13    | 11   | 22    | 11   | 10   | 12   | 24   | 21   |
| 6147 | 50    | 50    | 28.5 | 121   | 30   | 52.5 | 15   | 43   | 55   |
| 6148 | 63    | 71    | 35.5 | 158   | 39   | 67   | 25   | 53   | 61.5 |
| 6149 | 31    | 13    | 11   | 20    | 13   | 14   | 11   | 31   | 14   |
| 6150 | 59    | 53    | 29   | 131   | 30.5 | 56   | 19.5 | 40   | 66   |
| 6151 | 31    | 15.5  | 14   | 20    | 27   | 12   | 12   | 35   | 18   |
| 6152 | 50    | 50.5  | 30   | 129   | 27   | 54   | 15   | 43   | 72   |
| 6153 | 47.5  | 34    | 20   | 32    | 18   | 28   | 15.5 | 56   | 72   |
| 6154 | 67    | 56    | 41   | 147   | 30.5 | 78   | 14   | 56   | 76.5 |
| 6155 | 72    | 51    | 32   | 131   | 30   | 57   | 26   | 40.5 | 67   |

|      |      |       |      |       |      |      |      |      |      |
|------|------|-------|------|-------|------|------|------|------|------|
| 6156 | 27   | 14.5  | 11   | 18    | 45.5 | 11   | 12   | 31   | 23   |
| 6157 | 52   | 51    | 30   | 116   | 28   | 57   | 12   | 39   | 64   |
| 6158 | 27   | 14    | 11   | 20    | 16   | 14   | 9    | 29   | 14   |
| 6159 | 63.5 | 63    | 43   | 137   | 31   | 60   | 18   | 46   | 48   |
| 6160 | 61   | 59.5  | 31   | 166   | 35.5 | 54   | 16   | 43   | 84   |
| 6161 | 73   | 62.5  | 34.5 | 141   | 30   | 66   | 19   | 43   | 66   |
| 6162 | 132  | 40.5  | 21   | 38.5  | 23   | 41   | 21   | 67   | 38   |
| 6163 | 38   | 22    | 16   | 24    | 17   | 22   | 14   | 34   | 26   |
| 6164 | 44   | 38.5  | 33   | 122   | 22   | 47   | 11   | 36   | 53   |
| 6165 | 50.5 | 37    | 26   | 149.5 | 26   | 48   | 10   | 38   | 51   |
| 6166 | 47   | 27.5  | 25   | 28    | 24   | 26   | 15   | 38   | 55.5 |
| 6167 | 46   | 35    | 25   | 97    | 20.5 | 45.5 | 10   | 27   | 30   |
| 6168 | 26   | 12    | 13   | 18    | 15   | 9    | 8    | 27   | 46   |
| 6169 | 62.5 | 43.5  | 23   | 37    | 22   | 37   | 20   | 57   | 39.5 |
| 6170 | 256  | 142.5 | 38   | 152   | 34   | 739  | 15   | 306  | 133  |
| 6171 | 65   | 66    | 34   | 149.5 | 33   | 66.5 | 20   | 43   | 84.5 |
| 6172 | 25   | 11    | 9    | 18    | 10   | 9    | 8    | 21   | 27   |
| 6173 | 44.5 | 38    | 28   | 148   | 23   | 49   | 15   | 32   | 38.5 |
| 6174 | 42.5 | 16    | 13   | 22    | 15   | 16   | 12   | 44.5 | 23   |
| 6175 | 49   | 47    | 32.5 | 130   | 29   | 49   | 17.5 | 62.5 | 80   |
| 6176 | 35   | 17    | 13   | 22    | 17   | 13   | 10   | 32   | 36   |
| 6177 | 45   | 41.5  | 26   | 105.5 | 34.5 | 45   | 11   | 29.5 | 49   |
| 6178 | 53   | 53    | 28   | 140   | 30   | 54   | 17   | 37   | 51   |
| 6179 | 32   | 15    | 15   | 33    | 22   | 13   | 9    | 36   | 16   |
| 6180 | 50   | 42    | 28   | 127.5 | 30   | 54   | 14   | 31   | 45   |
| 6181 | 32   | 18    | 14.5 | 24.5  | 17   | 17   | 14.5 | 30   | 43.5 |
| 6182 | 65   | 84    | 32   | 164   | 38   | 66   | 27   | 48   | 72   |
| 6183 | 52   | 28.5  | 16   | 26    | 18   | 26   | 16   | 40   | 38   |
| 6184 | 67   | 74    | 32   | 166   | 34   | 59   | 20   | 46   | 72   |
| 6185 | 41   | 78    | 13   | 24    | 16   | 21   | 15   | 55   | 9    |
| 6186 | 63.5 | 93    | 33   | 191   | 39   | 77   | 29   | 57   | 85.5 |
| 6187 | 26   | 12    | 11   | 16    | 12   | 11   | 30   | 40   | 6    |
| 6188 | 49   | 55.5  | 28   | 152   | 25   | 52   | 21   | 36   | 53   |
| 6189 | 23   | 23    | 34   | 18    | 15   | 30   | 8    | 16   | 6    |
| 6190 | 68   | 102   | 42   | 211   | 41   | 71   | 32   | 74   | 80   |
| 6191 | 66.5 | 41    | 11   | 25    | 16   | 26   | 15   | 22.5 | 11   |
| 6192 | 58   | 71.5  | 36   | 167   | 78   | 60   | 25   | 54   | 97   |
| 6193 | 26   | 72    | 16   | 34    | 24   | 26   | 37   | 22   | 7    |
| 6194 | 64.5 | 57    | 33   | 176   | 34   | 62   | 16   | 45   | 55   |
| 6195 | 31   | 23    | 13   | 22    | 19.5 | 26   | 12   | 17   | 13   |
| 6196 | 59   | 70    | 30   | 152   | 34   | 66   | 23   | 45.5 | 68   |
| 6197 | 27   | 23.5  | 18   | 27    | 26   | 28   | 26.5 | 23   | 13   |
| 6198 | 53.5 | 51    | 29   | 129   | 29.5 | 51   | 14   | 40   | 47   |
| 6199 | 38   | 20.5  | 11   | 19    | 17   | 26   | 16   | 16   | 5    |
| 6200 | 54.5 | 57    | 28   | 145.5 | 34.5 | 55   | 15   | 36   | 53.5 |
| 6201 | 36.5 | 19.5  | 8.5  | 25    | 15.5 | 32   | 11   | 21   | 3    |
| 6202 | 41   | 39    | 29   | 134.5 | 322  | 47   | 15   | 35.5 | 70   |

|      |      |      |      |       |      |      |      |      |      |
|------|------|------|------|-------|------|------|------|------|------|
| 6203 | 43   | 23   | 9    | 37    | 20   | 31   | 9    | 29   | 5    |
| 6204 | 54   | 47.5 | 34   | 152.5 | 83   | 51   | 15   | 38   | 54   |
| 6205 | 31   | 19   | 22   | 21    | 19   | 24   | 13   | 19   | 10   |
| 6206 | 50.5 | 41.5 | 66.5 | 134   | 25.5 | 46   | 22   | 34.5 | 103  |
| 6207 | 32.5 | 19   | 9    | 39    | 15   | 22   | 7    | 17   | 7    |
| 6208 | 71.5 | 61   | 35   | 136   | 37   | 72.5 | 19   | 46   | 65.5 |
| 6209 | 36   | 37   | 22   | 31    | 1209 | 27   | 15   | 21.5 | 44   |
| 6210 | 60   | 65   | 35   | 149   | 39   | 59   | 28   | 49.5 | 97   |
| 6211 | 29   | 22   | 9    | 22    | 17   | 29   | 12   | 19   | 7    |
| 6212 | 53   | 53   | 29   | 137.5 | 31   | 47   | 20   | 41   | 48   |
| 6213 | 51   | 30   | 17   | 57    | 19   | 33.5 | 16   | 28   | 21   |
| 6214 | 64   | 57   | 31   | 148   | 54   | 56   | 20   | 41   | 108  |
| 6215 | 43   | 24.5 | 14   | 46    | 20.5 | 35.5 | 13   | 23   | 30   |
| 6216 | 50   | 58   | 32   | 141   | 32   | 53   | 16.5 | 37   | 64   |
| 6217 | 59.5 | 28.5 | 15   | 47    | 21   | 36   | 15   | 29.5 | 28   |
| 6218 | 84   | 70.5 | 25   | 55.5  | 28   | 73   | 23.5 | 57   | 70   |
| 6219 | 62   | 56   | 31   | 142   | 27   | 55   | 21   | 45   | 79   |
| 6220 | 80   | 57   | 27   | 69    | 30.5 | 61   | 24   | 60   | 60   |
| 6221 | 52.5 | 41   | 24   | 149   | 29   | 56.5 | 12   | 32   | 45   |
| 6222 | 46.5 | 37.5 | 13   | 42    | 22   | 40   | 12   | 29   | 35   |
| 6223 | 54   | 60.5 | 28   | 137.5 | 38.5 | 55   | 19   | 43   | 67   |
| 6224 | 35   | 21   | 13   | 46.5  | 22   | 28.5 | 8.5  | 24.5 | 14   |
| 6225 | 55   | 50   | 30   | 131   | 21   | 44.5 | 15   | 38   | 63   |
| 6226 | 53   | 55   | 27   | 131.5 | 28   | 51   | 14   | 41.5 | 89   |
| 6227 | 30   | 22   | 7    | 30    | 14   | 27   | 11.5 | 19   | 21.5 |
| 6228 | 57   | 59   | 74   | 160.5 | 54.5 | 52   | 31   | 46   | 87   |
| 6229 | 44   | 39   | 27   | 114   | 24   | 43   | 18   | 33.5 | 56   |
| 6230 | 46   | 31.5 | 16   | 48    | 24   | 38.5 | 14   | 30   | 32   |
| 6231 | 53   | 53   | 29   | 117   | 27   | 51   | 37   | 39   | 49   |
| 6232 | 61   | 47.5 | 22   | 59    | 26   | 59.5 | 21   | 44   | 68   |
| 6233 | 45   | 40   | 31   | 121   | 22   | 44   | 12   | 38   | 102  |
| 6234 | 46   | 33.5 | 15   | 68    | 21   | 32   | 18   | 39   | 51   |
| 6235 | 49   | 42   | 28   | 147   | 22   | 42.5 | 12   | 32   | 84   |
| 6236 | 36   | 25   | 12   | 58    | 17   | 30   | 10.5 | 34   | 17.5 |
| 6237 | 52   | 39   | 24.5 | 98    | 19   | 71   | 10   | 33.5 | 46   |
| 6238 | 68.5 | 53   | 25   | 62    | 25.5 | 56   | 22   | 53   | 41   |
| 6239 | 39.5 | 29   | 21   | 140   | 21.5 | 40   | 8    | 25   | 31   |
| 6240 | 34.5 | 26   | 17   | 36    | 17.5 | 31   | 9    | 22.5 | 17   |
| 6241 | 50   | 52   | 28   | 117   | 27   | 47   | 22   | 32   | 90   |
| 6242 | 26   | 20   | 10.5 | 30    | 16   | 23   | 11   | 21   | 12   |
| 6243 | 52   | 45   | 27   | 120   | 26   | 49   | 31   | 32   | 74   |
| 6244 | 41   | 25   | 11   | 32    | 16   | 30   | 11   | 22   | 27   |
| 6245 | 84   | 66.5 | 38   | 70    | 43.5 | 73   | 39   | 65   | 60   |
| 6246 | 52   | 48   | 25   | 122   | 25   | 46   | 16   | 32.5 | 45   |
| 6247 | 73   | 57   | 37.5 | 58    | 29   | 65   | 29   | 67   | 61   |
| 6248 | 57   | 46   | 39   | 130.5 | 32   | 44   | 15   | 42   | 65   |
| 6249 | 40   | 26   | 12   | 27    | 16   | 25.5 | 12   | 17   | 46   |

|      |       |      |      |       |      |      |      |      |       |
|------|-------|------|------|-------|------|------|------|------|-------|
| 6250 | 43.5  | 43   | 28   | 158   | 24   | 43.5 | 14   | 31   | 56    |
| 6251 | 40    | 28   | 12.5 | 25    | 17   | 31   | 10   | 20   | 24    |
| 6252 | 60    | 41   | 25   | 89    | 18.5 | 77   | 13   | 40   | 38    |
| 6253 | 31    | 20   | 11   | 29    | 15   | 25   | 6    | 16   | 67    |
| 6254 | 41    | 32   | 23   | 107   | 21   | 40   | 12   | 32   | 36    |
| 6255 | 26.5  | 18   | 13   | 56    | 15   | 22.5 | 18   | 29   | 8     |
| 6256 | 41    | 36   | 26   | 120.5 | 24   | 36   | 10   | 30   | 121   |
| 6257 | 26    | 18   | 9    | 20    | 16.5 | 21   | 9    | 14   | 39    |
| 6258 | 44    | 42   | 32   | 121   | 27   | 45   | 14   | 33   | 43.5  |
| 6259 | 48    | 30   | 10.5 | 34    | 15   | 34   | 10   | 23   | 21    |
| 6260 | 52    | 35   | 26   | 120   | 25.5 | 46   | 11   | 29   | 41    |
| 6261 | 124.5 | 25.5 | 15   | 28    | 35   | 28.5 | 14   | 31.5 | 12    |
| 6262 | 113   | 54   | 26   | 87    | 25   | 110  | 13.5 | 43   | 65    |
| 6263 | 48    | 35   | 23.5 | 88    | 21   | 43   | 10   | 32   | 29    |
| 6264 | 36    | 19.5 | 13   | 49    | 24   | 22   | 14   | 42   | 28    |
| 6265 | 45    | 34   | 24   | 235   | 28   | 50   | 12   | 34   | 105.5 |
| 6266 | 40    | 25.5 | 19   | 30    | 15   | 31   | 12   | 20   | 104   |
| 6267 | 58    | 37   | 27   | 135   | 22   | 51   | 16   | 39   | 54    |
| 6268 | 76.5  | 29   | 11   | 26    | 20   | 30   | 19   | 18   | 32    |
| 6269 | 51.5  | 40   | 24   | 105.5 | 86   | 46   | 18   | 43   | 31    |
| 6270 | 41    | 16   | 17   | 28    | 39.5 | 25   | 13   | 33   | 10    |
| 6271 | 25    | 16   | 13.5 | 35    | 17   | 18   | 19   | 20   | 23    |
| 6272 | 58    | 37   | 24.5 | 114   | 66.5 | 43.5 | 41   | 32   | 43    |
| 6273 | 24    | 14.5 | 6    | 19    | 174  | 19   | 11   | 16   | 11.5  |
| 6274 | 55    | 35   | 27   | 107.5 | 22   | 44   | 13   | 28   | 58    |
| 6275 | 22    | 14   | 8    | 25    | 15   | 18   | 6    | 14   | 11    |
| 6276 | 49    | 44   | 22   | 81    | 26   | 52   | 12   | 31   | 34    |
| 6277 | 21    | 12   | 6    | 22    | 11   | 18   | 10   | 14   | 5     |
| 6278 | 160   | 37   | 22   | 65    | 19   | 48   | 11   | 28   | 38    |
| 6279 | 18    | 14   | 21   | 15    | 13   | 19   | 39   | 13   | 7.5   |
| 6280 | 45.5  | 32   | 22   | 132   | 19   | 39.5 | 9    | 31   | 27    |
| 6281 | 22.5  | 20   | 275  | 27    | 19   | 22   | 9    | 27.5 | 36    |
| 6282 | 51    | 56   | 31   | 87    | 29.5 | 57.5 | 16   | 40   | 49.5  |
| 6283 | 46    | 16.5 | 13   | 16    | 22   | 20   | 9    | 19   | 13    |
| 6284 | 83    | 80   | 34   | 184   | 53   | 67   | 36   | 71.5 | 59    |
| 6285 | 26    | 19   | 34   | 26    | 21   | 21   | 16   | 53.5 | 11    |
| 6286 | 47    | 34.5 | 29.5 | 116.5 | 27   | 40.5 | 14   | 39   | 47    |
| 6287 | 155   | 21   | 17.5 | 28    | 27   | 23   | 16   | 19.5 | 14    |
| 6288 | 36    | 32   | 20   | 78.5  | 27   | 35   | 8    | 28   | 32    |
| 6289 | 21    | 18   | 7.5  | 17    | 16   | 18   | 10   | 12   | 11    |
| 6290 | 35    | 33   | 22   | 101   | 25   | 40   | 10   | 26   | 48    |
| 6291 | 29    | 17   | 10   | 35    | 15   | 27   | 9    | 24   | 8     |
| 6292 | 100   | 49   | 20   | 81.5  | 56   | 114  | 11   | 36   | 62    |
| 6293 | 21    | 13   | 6.5  | 14    | 8    | 17   | 7    | 13.5 | 5     |
| 6294 | 38    | 31   | 22   | 133   | 19.5 | 41   | 10   | 38   | 26    |
| 6295 | 28    | 18   | 7    | 20    | 12   | 21   | 12   | 16   | 42    |
| 6296 | 33    | 30   | 20   | 80.5  | 23   | 37.5 | 10   | 43   | 31.5  |



|      |       |      |     |       |      |        |      |       |      |
|------|-------|------|-----|-------|------|--------|------|-------|------|
| 6297 | 58    | 14   | 8   | 16    | 19.5 | 20     | 8    | 13    | 6    |
| 6298 | 44    | 35   | 25  | 119   | 37   | 44     | 11   | 35    | 50   |
| 6299 | 67.5  | 76   | 31  | 72    | 390  | 93     | 22   | 1236  | 54   |
| 6300 | 39.5  | 29.5 | 24  | 135   | 22   | 41.5   | 8    | 33    | 43   |
| 6301 | 30    | 19   | 15  | 24.5  | 19   | 23     | 9    | 21    | 12   |
| 6302 | 38.5  | 32   | 24  | 160   | 17   | 37     | 8    | 36    | 34   |
| 6303 | 28    | 18   | 17  | 33    | 17   | 24     | 8    | 20.5  | 19   |
| 6304 | 72.5  | 31   | 20  | 110   | 20   | 41     | 10   | 40    | 32   |
| 6305 | 28    | 16   | 14  | 14    | 12   | 18     | 8.5  | 13    | 5.5  |
| 6306 | 56    | 38   | 28  | 129   | 28   | 46     | 13   | 64    | 48   |
| 6307 | 33    | 17   | 13  | 43    | 12   | 24     | 5    | 47.5  | 12   |
| 6308 | 65    | 33   | 23  | 139   | 19   | 47     | 10   | 43    | 48.5 |
| 6309 | 22    | 15   | 8   | 17    | 12   | 22     | 8    | 14    | 4    |
| 6310 | 34    | 32   | 23  | 75    | 19   | 38     | 10   | 40    | 26   |
| 6311 | 15    | 13   | 8   | 19    | 11   | 17     | 9    | 12.5  | 13   |
| 6312 | 51    | 38   | 23  | 126   | 43   | 50     | 9    | 30.5  | 35.5 |
| 6313 | 17    | 11   | 8.5 | 19    | 10   | 17     | 8.5  | 12.5  | 3    |
| 6314 | 57    | 30   | 19  | 90    | 21   | 39     | 9    | 22    | 30   |
| 6315 | 26    | 22   | 12  | 55    | 44   | 33.5   | 11   | 187   | 13   |
| 6316 | 37    | 34   | 21  | 90    | 20   | 39     | 9    | 27    | 33   |
| 6317 | 20    | 16   | 6   | 29    | 11   | 20     | 7    | 13    | 7    |
| 6318 | 41.5  | 31   | 31  | 58    | 21   | 43     | 13   | 30.5  | 42   |
| 6319 | 39    | 22   | 23  | 33.5  | 23   | 29.5   | 16   | 19.5  | 12   |
| 6320 | 95    | 33.5 | 22  | 84    | 24   | 40     | 10   | 25    | 34   |
| 6321 | 30.5  | 22.5 | 30  | 19    | 17   | 24     | 13.5 | 16    | 11   |
| 6322 | 80.5  | 78   | 43  | 175   | 39   | 86     | 26   | 62    | 68   |
| 6323 | 28    | 19   | 12  | 58.5  | 19   | 29     | 11   | 33.5  | 10   |
| 6324 | 72    | 56   | 33  | 150   | 59   | 63     | 22   | 42    | 50   |
| 6325 | 27    | 19   | 7   | 57    | 15   | 25.5   | 16   | 89    | 7    |
| 6326 | 62.5  | 55   | 39  | 176.5 | 38.5 | 68     | 21   | 49.5  | 82.5 |
| 6327 | 31    | 21   | 7   | 28    | 19   | 27     | 7    | 19    | 6    |
| 6328 | 62.5  | 61.5 | 41  | 147   | 37   | 71     | 20   | 52    | 63   |
| 6329 | 490   | 583  | 74  | 235   | 80   | 1258.5 | 21.5 | 671.5 | 452  |
| 6330 | 117.5 | 71   | 37  | 67.5  | 29   | 81     | 28   | 65    | 79   |
| 6331 | 71    | 50   | 35  | 164.5 | 45.5 | 59     | 15   | 76    | 61.5 |
| 6332 | 92    | 58   | 30  | 64    | 41   | 56     | 27   | 57.5  | 58.5 |
| 6333 | 71    | 67   | 37  | 147   | 34   | 68     | 23   | 43    | 66   |
| 6334 | 51    | 19   | 12  | 51    | 13   | 23.5   | 10   | 25    | 33   |
| 6335 | 53    | 27   | 13  | 31    | 18.5 | 31.5   | 13   | 25    | 15   |
| 6336 | 69    | 57.5 | 36  | 155   | 41   | 69.5   | 37.5 | 49    | 72   |
| 6337 | 77    | 57.5 | 25  | 58    | 29   | 60     | 21   | 57    | 136  |
| 6338 | 71    | 53   | 43  | 148.5 | 36   | 77     | 14   | 44    | 65   |
| 6339 | 69    | 64   | 38  | 188.5 | 53   | 73     | 21   | 45.5  | 94   |
| 6340 | 75    | 47   | 24  | 56.5  | 27   | 46     | 23.5 | 45    | 61   |
| 6341 | 42.5  | 47.5 | 23  | 67    | 23   | 64     | 10   | 30    | 40.5 |
| 6342 | 84    | 75   | 45  | 188   | 42   | 72     | 38.5 | 52    | 141  |
| 6343 | 42    | 23   | 20  | 50    | 16   | 29     | 12   | 28    | 43   |

|      |      |      |      |       |      |      |      |      |       |
|------|------|------|------|-------|------|------|------|------|-------|
| 6344 | 61   | 62.5 | 37   | 140   | 35   | 65   | 19   | 50   | 64.5  |
| 6345 | 68   | 39.5 | 25   | 59    | 21   | 45   | 23   | 46   | 52    |
| 6346 | 61   | 59   | 35   | 136.5 | 34   | 67   | 18.5 | 43   | 69    |
| 6347 | 93   | 73   | 43   | 81.5  | 34   | 83   | 32   | 67.5 | 66    |
| 6348 | 81   | 62.5 | 40   | 158.5 | 36   | 74   | 18   | 53.5 | 61    |
| 6349 | 73   | 75   | 42   | 158   | 38   | 80   | 25   | 54.5 | 99    |
| 6350 | 79   | 147  | 76   | 201.5 | 37   | 94   | 27   | 692  | 58    |
| 6351 | 33.5 | 18   | 9    | 32    | 15   | 22   | 9    | 19   | 17    |
| 6352 | 82   | 65   | 36   | 172   | 43   | 70   | 22   | 55   | 71.5  |
| 6353 | 80   | 54   | 26.5 | 55.5  | 30   | 50   | 26   | 51   | 52    |
| 6354 | 59.5 | 47   | 35   | 152   | 36   | 51   | 16   | 42   | 67    |
| 6355 | 91   | 54.5 | 27.5 | 95.5  | 38   | 60   | 22.5 | 60.5 | 60    |
| 6356 | 94   | 92   | 46   | 193   | 49   | 77   | 38   | 57.5 | 80    |
| 6357 | 70.5 | 73   | 40   | 188   | 40   | 76   | 25   | 57.5 | 86    |
| 6358 | 49.5 | 24   | 14   | 44    | 24   | 28   | 12   | 24   | 69    |
| 6359 | 75   | 64   | 39   | 169   | 536  | 76   | 20   | 56   | 93    |
| 6360 | 36   | 22   | 12   | 33    | 16   | 27   | 10   | 28   | 63    |
| 6361 | 78   | 27.5 | 14   | 63    | 22   | 34   | 20   | 59.5 | 27.5  |
| 6362 | 84   | 77   | 41   | 190   | 46   | 78   | 31   | 63   | 143   |
| 6363 | 110  | 85   | 46   | 80    | 55   | 88.5 | 40.5 | 90   | 75    |
| 6364 | 236  | 33   | 16   | 54    | 14.5 | 36   | 12   | 37.5 | 31    |
| 6365 | 53   | 55   | 28   | 102.5 | 27   | 59   | 16   | 35   | 48    |
| 6366 | 79   | 37.5 | 19   | 62    | 31   | 42   | 27   | 63   | 55    |
| 6367 | 80   | 74   | 34.5 | 156   | 36   | 84   | 22   | 50   | 131   |
| 6368 | 76.5 | 57   | 27   | 81    | 29   | 53   | 20   | 53.5 | 54    |
| 6369 | 73.5 | 83   | 38   | 152   | 42   | 74   | 22   | 49.5 | 71    |
| 6370 | 117  | 39   | 23   | 55.5  | 23   | 48   | 34   | 41.5 | 39.5  |
| 6371 | 47   | 23   | 10   | 42.5  | 14   | 26   | 10.5 | 24   | 25    |
| 6372 | 74   | 30   | 15   | 41    | 19   | 36   | 16   | 31   | 26    |
| 6373 | 102  | 54.5 | 42   | 179.5 | 52   | 60   | 18   | 48   | 58    |
| 6374 | 90.5 | 67   | 41   | 162   | 38   | 65   | 19   | 61   | 64    |
| 6375 | 98   | 73.5 | 38   | 79    | 45   | 78   | 34   | 65   | 63    |
| 6376 | 77   | 62   | 57   | 159.5 | 34   | 61   | 21   | 50   | 92    |
| 6377 | 93   | 39   | 17.5 | 52.5  | 21   | 38   | 31.5 | 33   | 34.5  |
| 6378 | 66   | 51   | 42   | 167   | 33   | 59.5 | 15   | 46   | 67.5  |
| 6379 | 72   | 41.5 | 24   | 67.5  | 23.5 | 44.5 | 22   | 52   | 42    |
| 6380 | 80   | 68   | 43   | 169   | 41   | 78   | 24   | 53   | 68    |
| 6381 | 59.5 | 20   | 13   | 48    | 14.5 | 23   | 13   | 42   | 41    |
| 6382 | 46.5 | 22   | 14   | 43.5  | 22   | 23   | 41   | 22.5 | 15    |
| 6383 | 79.5 | 88   | 49   | 223   | 42.5 | 76   | 29   | 60   | 115.5 |
| 6384 | 43.5 | 20.5 | 8    | 37    | 10   | 29   | 8    | 16.5 | 63    |
| 6385 | 36   | 26   | 21   | 52.5  | 19   | 33   | 8    | 23   | 24.5  |
| 6386 | 53   | 29   | 13   | 36    | 14.5 | 36.5 | 10   | 22   | 33    |
| 6387 | 47   | 98   | 27   | 140   | 24   | 50   | 11   | 32   | 34    |
| 6388 | 71   | 35   | 20   | 55    | 20   | 43   | 20   | 39   | 57    |
| 6389 | 44.5 | 47.5 | 34   | 141   | 29   | 60   | 13   | 37   | 38    |
| 6390 | 35   | 41   | 9    | 46    | 11   | 20.5 | 8    | 21   | 23    |

|      |      |      |       |       |      |      |      |       |       |
|------|------|------|-------|-------|------|------|------|-------|-------|
| 6391 | 78.5 | 49   | 29    | 85    | 29   | 62   | 14   | 43    | 45    |
| 6392 | 53   | 24   | 10    | 36    | 13   | 29   | 13   | 27    | 34    |
| 6393 | 50   | 47.5 | 30.5  | 134   | 29   | 57.5 | 8.5  | 35    | 45    |
| 6394 | 43   | 36   | 30    | 77    | 19   | 50   | 9    | 25.5  | 35    |
| 6395 | 47.5 | 26   | 12    | 50    | 17   | 29   | 12   | 30.5  | 58    |
| 6396 | 132  | 46   | 42    | 103   | 56   | 57.5 | 42   | 85.5  | 47    |
| 6397 | 45.5 | 12   | 10    | 35    | 15   | 15.5 | 10   | 22.5  | 15    |
| 6398 | 74.5 | 47   | 42.5  | 125   | 40   | 64.5 | 20   | 50.5  | 51    |
| 6399 | 41   | 17   | 14    | 44    | 16   | 23   | 14   | 21    | 23    |
| 6400 | 93   | 44   | 273.5 | 101   | 111  | 52   | 37   | 58    | 57.5  |
| 6401 | 88   | 62   | 28    | 63    | 28   | 64   | 26   | 55    | 65    |
| 6402 | 61   | 44   | 29    | 174   | 25   | 56   | 13   | 62.5  | 153   |
| 6403 | 45.5 | 28   | 11    | 42.5  | 12   | 28   | 10   | 30    | 27    |
| 6404 | 52   | 46.5 | 32    | 127   | 37   | 54   | 13   | 33    | 44    |
| 6405 | 40   | 15   | 11    | 37    | 22   | 20   | 11   | 21.5  | 15    |
| 6406 | 62   | 59   | 34    | 197   | 27   | 56   | 15   | 40    | 60    |
| 6407 | 37   | 21   | 11    | 43    | 12   | 23.5 | 10   | 23    | 38    |
| 6408 | 48   | 16   | 10.5  | 42    | 70   | 20   | 8    | 20    | 21    |
| 6409 | 59.5 | 46   | 31.5  | 80.5  | 37   | 60   | 21   | 39    | 50    |
| 6410 | 34   | 26.5 | 8     | 45    | 9    | 21   | 8    | 34    | 11    |
| 6411 | 72   | 49   | 31    | 174   | 29   | 63   | 25.5 | 54.5  | 112.5 |
| 6412 | 26   | 14   | 9     | 25    | 9    | 16   | 7    | 15    | 7     |
| 6413 | 33   | 12   | 9     | 32    | 11   | 16   | 7    | 13    | 5     |
| 6414 | 43   | 36.5 | 28    | 110.5 | 21.5 | 39.5 | 9    | 34    | 30    |
| 6415 | 31   | 15   | 9     | 53.5  | 13   | 19   | 8    | 39    | 26    |
| 6416 | 53   | 42   | 27.5  | 164   | 30   | 52   | 21   | 44    | 42    |
| 6417 | 26   | 15   | 6     | 22    | 10   | 16   | 7    | 10    | 3     |
| 6418 | 39   | 35   | 21    | 61    | 18   | 43.5 | 9    | 26    | 32    |
| 6419 | 27   | 11   | 8     | 23    | 9    | 16   | 6    | 15    | 2     |
| 6420 | 63   | 43   | 28    | 114   | 26   | 51   | 14   | 32    | 35    |
| 6421 | 52   | 17   | 11    | 56    | 15   | 21   | 17   | 39    | 25    |
| 6422 | 96   | 25   | 20    | 62    | 66.5 | 25   | 12.5 | 40    | 40    |
| 6423 | 65   | 43.5 | 28.5  | 73    | 30   | 69.5 | 15   | 36    | 43    |
| 6424 | 61   | 29   | 11    | 93.5  | 17   | 20.5 | 44.5 | 44    | 14    |
| 6425 | 74   | 43.5 | 27    | 117   | 24   | 57   | 12   | 32    | 36    |
| 6426 | 28   | 14   | 8     | 14    | 11   | 17   | 11   | 11    | 5     |
| 6427 | 51   | 33   | 29.5  | 151   | 39   | 41   | 16   | 35    | 55    |
| 6428 | 48   | 18.5 | 13    | 29    | 24.5 | 19   | 11   | 17    | 28.5  |
| 6429 | 57   | 46   | 34    | 175   | 399  | 58   | 33   | 65    | 60    |
| 6430 | 55   | 67.5 | 24    | 129   | 19   | 93.5 | 18   | 708.5 | 27    |
| 6431 | 58.5 | 40   | 28    | 161   | 72   | 49   | 13   | 47    | 69    |
| 6432 | 81   | 15   | 14.5  | 57.5  | 26   | 17   | 13   | 22    | 32    |
| 6433 | 56   | 42   | 32    | 128   | 25   | 51.5 | 12   | 41    | 127   |
| 6434 | 64   | 20   | 13.5  | 167   | 16   | 28   | 38   | 30    | 18.5  |
| 6435 | 43   | 39   | 26    | 132   | 23   | 50   | 11   | 31    | 50.5  |
| 6436 | 59.5 | 27   | 8     | 24    | 14   | 77   | 12.5 | 26.5  | 18    |
| 6437 | 43   | 37   | 27    | 118   | 41   | 49   | 11   | 34    | 56    |

|      |       |      |      |       |      |      |      |      |      |
|------|-------|------|------|-------|------|------|------|------|------|
| 6438 | 33    | 16   | 12   | 21    | 15.5 | 21   | 7    | 26   | 5    |
| 6439 | 54.5  | 40   | 59   | 132   | 37.5 | 50   | 17   | 98   | 87   |
| 6440 | 45    | 15   | 6.5  | 20    | 9    | 16.5 | 6    | 24.5 | 12   |
| 6441 | 45    | 40   | 30   | 77.5  | 25   | 48   | 20   | 35   | 51   |
| 6442 | 29    | 14   | 8    | 18    | 7.5  | 14   | 7    | 12   | 3    |
| 6443 | 54    | 41   | 47   | 124   | 27   | 53   | 14   | 68   | 49   |
| 6444 | 32    | 13   | 8    | 28    | 12   | 17   | 5.5  | 20   | 8    |
| 6445 | 56    | 36   | 28   | 131   | 24   | 48.5 | 13   | 48.5 | 36.5 |
| 6446 | 25    | 12   | 7    | 18    | 11   | 14   | 6    | 11.5 | 3    |
| 6447 | 50    | 46   | 29   | 96    | 25   | 52   | 62   | 46   | 37   |
| 6448 | 31    | 12   | 8    | 21.5  | 25   | 15   | 10   | 15   | 13   |
| 6449 | 40    | 33   | 23   | 80    | 21   | 42   | 11   | 26   | 36   |
| 6450 | 58    | 18   | 12   | 27.5  | 25   | 18   | 14   | 21   | 6    |
| 6451 | 46    | 41   | 53   | 133   | 27   | 52   | 11   | 35   | 38   |
| 6452 | 45.5  | 38   | 29   | 127   | 23.5 | 50.5 | 15   | 34.5 | 52   |
| 6453 | 42    | 15   | 14   | 34    | 15   | 19   | 21   | 25   | 13   |
| 6454 | 67.5  | 40   | 37.5 | 103   | 58   | 52   | 13   | 49   | 49   |
| 6455 | 200.5 | 13   | 9    | 25    | 29   | 16   | 18   | 12   | 12   |
| 6456 | 56.5  | 41   | 30   | 133   | 28   | 50   | 20   | 33   | 46   |
| 6457 | 32    | 13   | 8    | 24    | 10   | 18   | 16   | 28   | 7    |
| 6458 | 40    | 41   | 22   | 71    | 18   | 53   | 9    | 28   | 32   |
| 6459 | 95.5  | 14   | 12.5 | 42    | 12   | 18   | 10   | 18   | 7    |
| 6460 | 65    | 37   | 34.5 | 178   | 42   | 48   | 47   | 51   | 49   |
| 6461 | 48    | 39   | 29   | 109   | 31   | 49.5 | 34   | 45   | 34   |
| 6462 | 42    | 21   | 11   | 44    | 15   | 28   | 11   | 20   | 15   |
| 6463 | 44    | 23   | 56.5 | 182.5 | 25   | 29   | 22   | 102  | 7    |
| 6464 | 37    | 26   | 25   | 109   | 20   | 26   | 10   | 23.5 | 29   |
| 6465 | 20    | 16   | 5    | 7     | 5.5  | 19   | 5    | 10   | 1    |
| 6466 | 16    | 9    | 5    | 8     | 5    | 14   | 5    | 8    | 2    |
| 6467 | 40    | 31   | 23   | 84    | 20   | 42   | 9    | 26   | 29   |
| 6468 | 28.5  | 12   | 6    | 28    | 10   | 15   | 9    | 13   | 7    |
| 6469 | 42.5  | 43   | 26   | 98    | 22   | 45   | 16   | 30   | 35   |
| 6470 | 29    | 11   | 6    | 27    | 7.5  | 13   | 7    | 12   | 33   |
| 6471 | 54    | 38   | 30   | 152   | 24   | 53   | 14   | 31.5 | 40   |
| 6472 | 28    | 14   | 8    | 32    | 11   | 14   | 9.5  | 25   | 10   |
| 6473 | 53.5  | 41   | 32   | 106   | 33   | 52   | 12   | 53   | 121  |
| 6474 | 33    | 13   | 8    | 35    | 14   | 16   | 7    | 24.5 | 37   |
| 6475 | 57    | 33.5 | 38   | 145.5 | 20   | 41   | 14   | 27   | 34   |
| 6476 | 331   | 205  | 6    | 36    | 10   | 1146 | 12   | 25   | 95   |
| 6477 | 36    | 16   | 12.5 | 88    | 29   | 27   | 47.5 | 99   | 9    |
| 6478 | 102.5 | 112  | 44.5 | 293   | 40   | 76   | 31   | 304  | 78.5 |
| 6479 | 30    | 12   | 13   | 33    | 10   | 16   | 14   | 19   | 15   |
| 6480 | 57.5  | 41   | 32   | 117.5 | 34   | 49   | 17   | 38   | 48.5 |
| 6481 | 25    | 9    | 7    | 31.5  | 10   | 11   | 33   | 20   | 27   |
| 6482 | 48.5  | 37   | 26   | 108   | 27   | 44   | 13   | 32   | 52   |
| 6483 | 45    | 11   | 9    | 35    | 12   | 13   | 7    | 20   | 15   |
| 6484 | 45    | 14   | 9    | 35    | 9.5  | 18.5 | 10   | 17   | 17   |

|      |       |      |      |       |       |      |      |       |       |
|------|-------|------|------|-------|-------|------|------|-------|-------|
| 6485 | 39    | 33   | 20   | 67.5  | 22    | 39   | 203  | 24.5  | 27    |
| 6486 | 24    | 11   | 8    | 34    | 20    | 14   | 7    | 15    | 5     |
| 6487 | 199   | 48   | 28   | 176   | 50    | 138  | 17   | 46    | 77.5  |
| 6488 | 30    | 13.5 | 9    | 39    | 14    | 16.5 | 10   | 25    | 34    |
| 6489 | 39    | 32.5 | 21   | 71.5  | 20    | 40.5 | 9    | 22    | 31    |
| 6490 | 42    | 21   | 13.5 | 23    | 16.5  | 26   | 33   | 22    | 9     |
| 6491 | 67    | 54   | 35   | 123.5 | 27    | 53   | 34   | 94    | 48    |
| 6492 | 41.5  | 35   | 23   | 89    | 21    | 47   | 12   | 36.5  | 33    |
| 6493 | 139   | 10   | 9    | 35    | 19    | 11   | 8    | 15    | 6     |
| 6494 | 114   | 43   | 33   | 93    | 27.5  | 59   | 19   | 58.5  | 48.5  |
| 6495 | 89    | 10   | 8    | 16    | 11    | 12   | 7    | 10    | 8     |
| 6496 | 41.5  | 37   | 28   | 104   | 22    | 49   | 13   | 100.5 | 33    |
| 6497 | 27    | 18   | 8    | 30    | 16    | 14   | 8    | 30.5  | 58    |
| 6498 | 42    | 35   | 21   | 81    | 17    | 43.5 | 10   | 25.5  | 28.5  |
| 6499 | 45    | 15   | 10   | 23    | 12    | 16   | 10   | 21    | 11    |
| 6500 | 38    | 34   | 25   | 90    | 22    | 46   | 14.5 | 28    | 34    |
| 6501 | 35    | 13   | 11   | 78    | 26    | 15   | 23.5 | 37    | 11    |
| 6502 | 339.5 | 39   | 27   | 165   | 35    | 48.5 | 10   | 47    | 47.5  |
| 6503 | 23    | 9    | 8    | 18    | 12    | 10   | 7    | 12    | 13    |
| 6504 | 63    | 75   | 30   | 162   | 30    | 53.5 | 22   | 54.5  | 125   |
| 6505 | 31.5  | 17   | 9    | 30    | 9     | 16   | 8    | 14    | 24    |
| 6506 | 47    | 39.5 | 32   | 134   | 24    | 49   | 12   | 38.5  | 43    |
| 6507 | 31    | 13.5 | 10   | 24.5  | 17.5  | 14   | 7    | 13    | 19    |
| 6508 | 40    | 35   | 23   | 66    | 30    | 40   | 12   | 26    | 41    |
| 6509 | 362   | 49   | 85   | 355   | 41    | 59   | 47   | 148   | 49    |
| 6510 | 44    | 12   | 10   | 26    | 9     | 14   | 8    | 12    | 14.5  |
| 6511 | 49    | 39   | 28   | 93    | 30    | 45.5 | 12   | 35.5  | 37    |
| 6512 | 36    | 14   | 16   | 32    | 17.5  | 17   | 21   | 21    | 9     |
| 6513 | 83    | 40   | 27.5 | 85    | 25    | 49   | 13   | 30.5  | 58.5  |
| 6514 | 257   | 11   | 9    | 29    | 11    | 12   | 13   | 19    | 11    |
| 6515 | 73    | 33   | 26   | 114   | 64.5  | 42.5 | 28   | 39    | 43    |
| 6516 | 65    | 39   | 31   | 97.5  | 58    | 51   | 20   | 36    | 41.5  |
| 6517 | 45    | 12   | 13   | 36    | 10    | 17   | 24   | 19    | 9     |
| 6518 | 46.5  | 29   | 27   | 114   | 25.5  | 33   | 13   | 28.5  | 65    |
| 6519 | 34    | 17   | 9    | 20    | 11    | 17   | 8.5  | 12    | 210.5 |
| 6520 | 48    | 39   | 28   | 99.5  | 26    | 51   | 17   | 53.5  | 40    |
| 6521 | 35    | 12   | 8    | 26.5  | 11    | 11   | 8    | 11    | 8     |
| 6522 | 68.5  | 44   | 31   | 86.5  | 75.5  | 51   | 20   | 55    | 50.5  |
| 6523 | 28    | 10   | 11   | 26    | 21    | 13   | 16   | 16    | 18    |
| 6524 | 105.5 | 40   | 32   | 130   | 1234  | 46   | 15   | 48    | 59    |
| 6525 | 32    | 18   | 9    | 36    | 15    | 13   | 11   | 17    | 57    |
| 6526 | 796.5 | 66   | 37   | 211   | 34    | 73   | 22   | 89    | 140   |
| 6527 | 44    | 11   | 9    | 45    | 14    | 15.5 | 11   | 38    | 47    |
| 6528 | 46    | 41   | 24   | 92.5  | 132.5 | 43   | 14   | 29    | 37    |
| 6529 | 45    | 51   | 9    | 24    | 18    | 13   | 9    | 12    | 48    |
| 6530 | 40    | 33.5 | 25.5 | 104   | 18    | 45   | 9    | 31    | 30.5  |
| 6531 | 32    | 14   | 8    | 43    | 9.5   | 16   | 10   | 36    | 6     |

|      |       |      |      |       |      |      |      |      |      |
|------|-------|------|------|-------|------|------|------|------|------|
| 6532 | 58    | 62.5 | 26   | 135   | 27   | 53   | 20   | 38   | 59   |
| 6533 | 52.5  | 32   | 17   | 42.5  | 18   | 32   | 14   | 30   | 53   |
| 6534 | 64.5  | 57   | 71   | 177   | 47   | 61   | 19   | 54   | 84.5 |
| 6535 | 105.5 | 35   | 10   | 42    | 13   | 47   | 7    | 33   | 40   |
| 6536 | 48    | 43   | 29   | 143.5 | 25   | 45   | 13   | 33   | 64   |
| 6537 | 45    | 20.5 | 14   | 35    | 17   | 22   | 12   | 25   | 44   |
| 6538 | 60.5  | 69.5 | 35.5 | 142   | 30.5 | 59   | 23   | 46   | 118  |
| 6539 | 88    | 72   | 36.5 | 73    | 30   | 69   | 29   | 73   | 64   |
| 6540 | 88    | 49.5 | 34   | 147   | 28.5 | 58   | 21   | 47   | 57   |
| 6541 | 49    | 27   | 13   | 38    | 15   | 26   | 11   | 27   | 30   |
| 6542 | 50    | 51   | 30   | 138   | 26   | 46.5 | 14   | 34   | 62   |
| 6543 | 36.5  | 30   | 24   | 113   | 18   | 40   | 10   | 26.5 | 40   |
| 6544 | 55    | 27   | 15   | 42    | 17   | 30   | 12   | 37   | 35   |
| 6545 | 74    | 51   | 31   | 156   | 32   | 62   | 15   | 52.5 | 124  |
| 6546 | 44    | 25   | 10.5 | 41.5  | 34   | 26   | 14.5 | 26   | 43   |
| 6547 | 43    | 33   | 24   | 119   | 34.5 | 39   | 11   | 35.5 | 75.5 |
| 6548 | 43    | 21   | 12   | 41    | 14   | 25   | 12   | 30   | 31   |
| 6549 | 49.5  | 52   | 31   | 129   | 31   | 46   | 17   | 35   | 60   |
| 6550 | 64.5  | 43   | 22.5 | 51    | 33   | 45   | 21   | 43   | 44.5 |
| 6551 | 48    | 42   | 31   | 140.5 | 24   | 46.5 | 14   | 35   | 52   |
| 6552 | 64    | 39   | 19   | 53    | 25   | 42   | 17   | 38   | 50   |
| 6553 | 49.5  | 39   | 30   | 138   | 26   | 47   | 11   | 37   | 59   |
| 6554 | 39    | 19.5 | 11   | 49.5  | 12   | 19   | 9    | 24   | 22   |
| 6555 | 56    | 43   | 32   | 128   | 25   | 46   | 15   | 34.5 | 49.5 |
| 6556 | 45    | 35   | 36   | 129.5 | 22   | 44   | 12   | 36   | 78   |
| 6557 | 36    | 14.5 | 9    | 40    | 10   | 17   | 8    | 18   | 44   |
| 6558 | 44.5  | 50   | 34   | 142   | 28   | 47   | 18   | 48.5 | 51   |
| 6559 | 38    | 17   | 10   | 36    | 11   | 20   | 8    | 19   | 40   |
| 6560 | 34    | 15   | 8    | 33    | 12   | 15   | 11   | 13   | 13   |
| 6561 | 63.5  | 55   | 43   | 187   | 35   | 50   | 24   | 69   | 104  |
| 6562 | 49    | 29   | 14   | 38    | 13   | 37   | 14   | 26   | 41.5 |
| 6563 | 69    | 90   | 40   | 203.5 | 73   | 65.5 | 30   | 55   | 127  |
| 6564 | 34    | 12   | 8    | 40    | 15   | 15   | 8    | 16   | 22   |
| 6565 | 58    | 78   | 44   | 187   | 36   | 85   | 24   | 79.5 | 83.5 |
| 6566 | 39    | 10   | 9    | 28    | 13   | 12   | 7    | 15   | 14   |
| 6567 | 20    | 8    | 8    | 29    | 8    | 12   | 6    | 13   | 8    |
| 6568 | 40    | 12   | 10   | 46    | 13   | 17   | 8    | 52   | 50   |
| 6569 | 43    | 38   | 32   | 149.5 | 28   | 39.5 | 24   | 33   | 77.5 |
| 6570 | 43    | 11   | 9    | 33    | 9    | 13   | 7    | 16   | 19   |
| 6571 | 65    | 80   | 40   | 194   | 44   | 63   | 32   | 59   | 115  |
| 6572 | 50    | 30   | 16   | 42.5  | 19   | 29   | 16   | 31   | 54   |
| 6573 | 57    | 59   | 40   | 166.5 | 29   | 55.5 | 21   | 40   | 120  |
| 6574 | 28    | 10   | 11   | 33    | 10   | 13   | 9.5  | 16   | 17   |
| 6575 | 65    | 58   | 32   | 277   | 37   | 59   | 21   | 56   | 88   |
| 6576 | 75    | 42   | 21   | 55    | 20   | 48   | 21   | 45.5 | 46   |
| 6577 | 69    | 49   | 25.5 | 211.5 | 31   | 49   | 17   | 42   | 81   |
| 6578 | 27.5  | 9.5  | 14   | 36    | 9    | 13.5 | 7    | 14   | 17.5 |

|      |      |      |      |       |      |      |      |      |       |
|------|------|------|------|-------|------|------|------|------|-------|
| 6579 | 72   | 83   | 33   | 143   | 34   | 57   | 26   | 57   | 68    |
| 6580 | 32   | 11   | 8    | 29    | 27   | 13   | 6    | 18   | 24    |
| 6581 | 41   | 19.5 | 13   | 44    | 12.5 | 23   | 11   | 23.5 | 23    |
| 6582 | 54   | 58   | 29   | 155   | 43   | 50   | 18   | 56   | 54    |
| 6583 | 39   | 18.5 | 13   | 40    | 15   | 23.5 | 13   | 26   | 32    |
| 6584 | 69   | 76   | 33   | 169   | 83   | 62   | 26   | 48   | 70    |
| 6585 | 31   | 12   | 9    | 33    | 10   | 16.5 | 9    | 15   | 28    |
| 6586 | 58   | 51   | 27   | 146   | 27   | 59   | 14   | 46   | 67    |
| 6587 | 45   | 22   | 11   | 35.5  | 13   | 27   | 10.5 | 25   | 34    |
| 6588 | 61   | 80   | 32   | 169.5 | 36   | 62   | 22   | 43   | 71    |
| 6589 | 57   | 31   | 21   | 53    | 23   | 32   | 18   | 43   | 44    |
| 6590 | 46   | 42   | 38   | 133   | 26   | 47   | 14   | 32   | 57    |
| 6591 | 60   | 39   | 18.5 | 48    | 18   | 41   | 17   | 44   | 48    |
| 6592 | 62   | 56   | 36   | 151   | 30   | 53   | 19   | 46   | 53    |
| 6593 | 47   | 13.5 | 9.5  | 39    | 13   | 14   | 13   | 18   | 16    |
| 6594 | 70   | 51   | 31   | 156   | 24   | 64   | 15   | 40.5 | 75    |
| 6595 | 56   | 32.5 | 14   | 44    | 15   | 36   | 10   | 29   | 24.5  |
| 6596 | 62   | 63   | 30   | 140   | 32   | 59   | 19   | 42.5 | 52    |
| 6597 | 35   | 13   | 11   | 41    | 16   | 14   | 10   | 32   | 36    |
| 6598 | 66.5 | 89   | 50   | 206.5 | 54.5 | 64   | 32   | 57   | 101.5 |
| 6599 | 24   | 11   | 8    | 29    | 8    | 16   | 9    | 15   | 18    |
| 6600 | 85   | 59   | 33   | 177   | 29   | 49.5 | 21   | 47   | 67    |
| 6601 | 33   | 11   | 14   | 34    | 9    | 12   | 7    | 17   | 30    |
| 6602 | 71   | 50   | 27.5 | 166   | 23   | 65   | 14   | 36   | 55.5  |
| 6603 | 38   | 13   | 9.5  | 38    | 11   | 13   | 7    | 16   | 12    |
| 6604 | 65   | 48   | 26   | 55    | 20   | 46.5 | 25.5 | 49   | 52    |
| 6605 | 49   | 47   | 27.5 | 155   | 25   | 44   | 16   | 38   | 62    |
| 6606 | 36   | 24   | 12   | 40    | 12   | 23   | 12   | 25   | 19    |
| 6607 | 61   | 95.5 | 34   | 175   | 33   | 64   | 26   | 50   | 90.5  |
| 6608 | 57.5 | 75   | 33   | 135   | 33   | 53   | 22   | 41   | 90.5  |
| 6609 | 57   | 51   | 26   | 134   | 27   | 47   | 17   | 37   | 51    |
| 6610 | 68   | 43   | 19   | 49    | 21   | 48.5 | 18   | 39   | 45    |
| 6611 | 42   | 38   | 26   | 125.5 | 20   | 46   | 10   | 29   | 46    |
| 6612 | 50   | 36   | 26   | 149.5 | 18.5 | 48   | 9    | 31   | 88    |
| 6613 | 50   | 31   | 19   | 58    | 20   | 33   | 13.5 | 36   | 29    |
| 6614 | 69   | 40.5 | 25   | 137.5 | 38   | 54   | 10   | 31   | 58    |
| 6615 | 49   | 20   | 14   | 44    | 18   | 20.5 | 12   | 29   | 35    |
| 6616 | 77.5 | 61   | 31   | 153   | 27   | 75   | 15   | 42   | 63    |
| 6617 | 47   | 30   | 15   | 49    | 17   | 31   | 12   | 38   | 31    |
| 6618 | 45   | 39   | 28   | 143   | 25   | 45   | 12   | 34   | 39    |
| 6619 | 34   | 18   | 14   | 40    | 11   | 19   | 12   | 21   | 15    |
| 6620 | 46   | 33   | 31.5 | 127   | 24   | 42   | 13   | 37   | 49    |
| 6621 | 27   | 11   | 9    | 27    | 10   | 18   | 8    | 13   | 56.5  |
| 6622 | 62   | 60   | 102  | 166.5 | 47.5 | 54   | 23   | 43   | 60    |
| 6623 | 28   | 12   | 7    | 31    | 11   | 13   | 7    | 30   | 7     |
| 6624 | 101  | 49.5 | 28   | 123.5 | 108  | 55.5 | 16   | 40.5 | 59    |
| 6625 | 78   | 102  | 32   | 226.5 | 46   | 65   | 30   | 51   | 96    |

|      |       |      |      |       |       |      |      |      |      |
|------|-------|------|------|-------|-------|------|------|------|------|
| 6626 | 28    | 9.5  | 10   | 31.5  | 14    | 14   | 12   | 15   | 7    |
| 6627 | 37    | 31   | 25   | 128   | 20    | 37   | 11   | 27.5 | 73   |
| 6628 | 22    | 11   | 9    | 36.5  | 9     | 17.5 | 9    | 59   | 10   |
| 6629 | 20    | 9    | 7    | 23    | 9     | 10   | 5    | 9    | 5    |
| 6630 | 96    | 82.5 | 42   | 174.5 | 87    | 81   | 30   | 98   | 96   |
| 6631 | 22    | 9    | 7    | 24    | 10    | 12   | 6    | 12   | 10   |
| 6632 | 60    | 65.5 | 38   | 136   | 31    | 64   | 17   | 54.5 | 82   |
| 6633 | 34    | 12   | 13.5 | 21    | 11    | 12   | 9    | 12   | 7    |
| 6634 | 56    | 72   | 35   | 212   | 39    | 63   | 20.5 | 47   | 80   |
| 6635 | 26    | 10   | 8    | 11    | 9     | 15   | 9    | 7    | 6    |
| 6636 | 49.5  | 54   | 27   | 124.5 | 35    | 58   | 16   | 37.5 | 65   |
| 6637 | 19    | 7    | 4    | 12    | 7     | 7    | 5    | 7    | 3    |
| 6638 | 61.5  | 69   | 36   | 166.5 | 59.5  | 70   | 23   | 50   | 72   |
| 6639 | 20.5  | 10   | 10   | 23    | 10    | 14   | 6    | 32   | 29   |
| 6640 | 48.5  | 50   | 28   | 127   | 35    | 47.5 | 14.5 | 33   | 69   |
| 6641 | 43    | 9    | 9    | 17    | 10    | 12   | 6    | 11   | 12   |
| 6642 | 19    | 7    | 7    | 20.5  | 8     | 8    | 6    | 14   | 5    |
| 6643 | 104.5 | 71   | 34   | 179   | 50    | 63   | 25   | 47   | 87.5 |
| 6644 | 38    | 9    | 8    | 20    | 7.5   | 10   | 8    | 10   | 24   |
| 6645 | 60    | 52   | 27.5 | 125   | 33.5  | 50.5 | 17   | 41   | 69.5 |
| 6646 | 27    | 11   | 9    | 17.5  | 10    | 16   | 9    | 11   | 6    |
| 6647 | 49    | 10   | 13   | 20    | 12    | 10   | 12   | 12   | 4    |
| 6648 | 116   | 48   | 27   | 134   | 28    | 49   | 13.5 | 33   | 53   |
| 6649 | 17    | 7    | 8    | 14    | 8     | 10   | 9    | 10   | 8    |
| 6650 | 65.5  | 58   | 32   | 132   | 48    | 83.5 | 12   | 40.5 | 64   |
| 6651 | 25    | 14.5 | 6    | 14    | 11    | 20   | 7    | 11   | 3    |
| 6652 | 27.5  | 16.5 | 8    | 26    | 12    | 18   | 6    | 19   | 6    |
| 6653 | 49.5  | 53.5 | 27.5 | 149   | 32    | 51   | 18   | 48   | 61   |
| 6654 | 41    | 19   | 11   | 25    | 12    | 20   | 9    | 22   | 3    |
| 6655 | 53.5  | 43   | 23   | 102   | 20    | 66   | 14   | 31   | 37   |
| 6656 | 24    | 14   | 6.5  | 21    | 10    | 20   | 5    | 13   | 6    |
| 6657 | 41    | 67.5 | 25   | 98    | 17    | 46   | 12   | 51   | 32   |
| 6658 | 27    | 15   | 9    | 26    | 11    | 22   | 7    | 16   | 5    |
| 6659 | 54    | 53   | 23   | 82    | 24.5  | 58   | 14   | 27   | 37   |
| 6660 | 520   | 454  | 12   | 41    | 27    | 1933 | 46   | 75   | 212  |
| 6661 | 56    | 37   | 25   | 130   | 18    | 51   | 15   | 35.5 | 49   |
| 6662 | 26.5  | 16   | 7    | 15    | 12    | 20   | 10   | 12   | 7    |
| 6663 | 40    | 38   | 23   | 104   | 17    | 43.5 | 20   | 29   | 32   |
| 6664 | 93    | 35.5 | 22.5 | 89.5  | 19    | 41   | 18   | 25   | 30   |
| 6665 | 42.5  | 19   | 11   | 45.5  | 28    | 22   | 10   | 58   | 15   |
| 6666 | 39.5  | 37   | 21   | 93    | 24    | 41   | 16   | 24   | 28   |
| 6667 | 71.5  | 22   | 11.5 | 51    | 562.5 | 24   | 12   | 30   | 42.5 |
| 6668 | 35    | 16   | 9    | 31    | 13.5  | 17   | 7.5  | 22   | 13   |
| 6669 | 29    | 17   | 8    | 24    | 13    | 20   | 6    | 15   | 52   |
| 6670 | 38    | 22   | 13   | 35    | 16    | 24   | 8    | 19   | 15   |
| 6671 | 52    | 41   | 31   | 191.5 | 35    | 64   | 30   | 59   | 62.5 |
| 6672 | 49    | 32   | 14   | 36    | 15    | 37   | 12   | 32   | 23   |



|      |      |      |      |       |       |       |      |      |      |
|------|------|------|------|-------|-------|-------|------|------|------|
| 6673 | 43   | 36   | 27   | 173   | 28    | 48    | 27   | 40   | 32   |
| 6674 | 40   | 24   | 12   | 32    | 17    | 27.5  | 15   | 25   | 25   |
| 6675 | 64   | 39   | 42   | 150.5 | 29    | 48    | 33   | 42   | 35   |
| 6676 | 57   | 38.5 | 22   | 53    | 25    | 39.5  | 17   | 45   | 45   |
| 6677 | 114  | 90   | 53   | 104   | 118.5 | 115   | 32   | 99   | 109  |
| 6678 | 29.5 | 15   | 11   | 31    | 12    | 21    | 7    | 15.5 | 30   |
| 6679 | 68   | 71.5 | 31   | 126.5 | 35.5  | 93    | 12   | 80.5 | 85   |
| 6680 | 350  | 47   | 22   | 60.5  | 25    | 43.5  | 21   | 44   | 55   |
| 6681 | 55   | 40   | 31   | 131   | 22    | 46    | 17   | 37   | 44   |
| 6682 | 33   | 18   | 9    | 36    | 15    | 22    | 8    | 21   | 29   |
| 6683 | 47   | 35   | 23   | 127   | 23    | 44.5  | 9    | 37   | 50   |
| 6684 | 81   | 50   | 37   | 65    | 37    | 62    | 22   | 63   | 69   |
| 6685 | 50   | 36.5 | 17   | 114.5 | 17    | 51    | 10   | 38   | 35   |
| 6686 | 57   | 41   | 21   | 51    | 27    | 48    | 22   | 45.5 | 39   |
| 6687 | 41   | 33   | 19   | 97    | 18    | 43    | 14   | 32   | 31   |
| 6688 | 58   | 39.5 | 20   | 49    | 25    | 47    | 21   | 40   | 38   |
| 6689 | 32   | 34   | 22   | 97    | 135   | 41    | 8    | 32   | 30   |
| 6690 | 32   | 17   | 12   | 31    | 26.5  | 18    | 9    | 17   | 32   |
| 6691 | 130  | 107  | 54.5 | 87    | 43    | 101.5 | 37.5 | 88   | 115  |
| 6692 | 66.5 | 34   | 19   | 63    | 61.5  | 41    | 8    | 28   | 28   |
| 6693 | 61   | 40   | 18   | 45    | 19    | 39    | 21   | 34   | 34   |
| 6694 | 53   | 30   | 19   | 59    | 17    | 37    | 9    | 27.5 | 28   |
| 6695 | 40   | 20.5 | 12   | 37    | 15    | 24    | 20   | 25   | 22   |
| 6696 | 71   | 34   | 21   | 73    | 23    | 40    | 17   | 36   | 39   |
| 6697 | 47   | 28   | 18   | 48    | 17    | 35    | 13   | 34.5 | 37   |
| 6698 | 46.5 | 40   | 21   | 61.5  | 17    | 53    | 10   | 23   | 63.5 |
| 6699 | 59   | 33.5 | 16   | 51    | 20.5  | 41    | 14   | 40   | 51   |
| 6700 | 53   | 39   | 25   | 85.5  | 32    | 66.5  | 11   | 28   | 38   |
| 6701 | 43   | 26   | 10   | 42    | 18    | 32    | 11   | 28   | 31.5 |
| 6702 | 45   | 43   | 24   | 118   | 28    | 40    | 16   | 32   | 84   |
| 6703 | 63   | 36   | 18   | 56    | 18.5  | 38    | 16   | 34   | 38   |
| 6704 | 38   | 37   | 23   | 118   | 48    | 46.5  | 12   | 36   | 46   |
| 6705 | 43   | 15   | 9    | 35    | 22    | 18    | 7    | 16   | 10   |
| 6706 | 52   | 56   | 29   | 135   | 29    | 51    | 21   | 44   | 55   |
| 6707 | 90   | 62.5 | 31   | 68    | 33    | 64.5  | 23.5 | 61   | 111  |
| 6708 | 44   | 50   | 25   | 146   | 25    | 49    | 22   | 41   | 53   |
| 6709 | 35   | 23   | 8    | 39    | 12    | 29    | 9    | 25   | 35   |
| 6710 | 45   | 41   | 23   | 136.5 | 21    | 44    | 11   | 34   | 43   |
| 6711 | 88   | 67.5 | 54   | 68.5  | 35    | 75    | 27   | 64   | 70   |
| 6712 | 47   | 49   | 24   | 132   | 21    | 44    | 12   | 38   | 81   |
| 6713 | 37.5 | 23   | 12   | 43    | 34    | 25.5  | 10   | 27   | 23.5 |
| 6714 | 48   | 48   | 33   | 126   | 28.5  | 48.5  | 14   | 35.5 | 54.5 |
| 6715 | 69   | 34   | 15   | 49    | 24.5  | 34    | 12   | 31   | 29   |
| 6716 | 49.5 | 59.5 | 28   | 151   | 26    | 51    | 24   | 47.5 | 71   |
| 6717 | 32   | 21   | 11   | 29    | 23    | 24    | 9    | 18   | 16   |
| 6718 | 34   | 30   | 46   | 122   | 23    | 36    | 10   | 34   | 33   |
| 6719 | 96   | 28   | 13   | 92    | 22    | 45    | 93   | 232  | 12.5 |

|      |      |        |       |       |      |      |      |       |      |
|------|------|--------|-------|-------|------|------|------|-------|------|
| 6720 | 38   | 36     | 22    | 116.5 | 17.5 | 39   | 10   | 30    | 47.5 |
| 6721 | 31   | 13     | 9     | 53    | 13.5 | 18   | 6    | 30.5  | 6    |
| 6722 | 360  | 331    | 40    | 186   | 29   | 1028 | 15   | 500.5 | 238  |
| 6723 | 25   | 16     | 9     | 28    | 12   | 19   | 7    | 15    | 6    |
| 6724 | 47   | 44     | 26    | 145   | 25.5 | 41.5 | 15   | 36    | 73   |
| 6725 | 22   | 12     | 6     | 26    | 10   | 14   | 7    | 14.5  | 11   |
| 6726 | 41   | 41     | 25    | 137   | 23   | 44   | 12   | 57.5  | 52   |
| 6727 | 45   | 15     | 11.5  | 44    | 21   | 19   | 9    | 29    | 28   |
| 6728 | 39.5 | 37     | 25    | 139   | 22   | 37   | 12   | 31    | 40   |
| 6729 | 30   | 12.5   | 13    | 25    | 12   | 12   | 7    | 11    | 5    |
| 6730 | 38   | 35     | 23    | 101.5 | 19   | 38.5 | 14   | 28    | 36   |
| 6731 | 37.5 | 35     | 12    | 27    | 19   | 29   | 8    | 18    | 13   |
| 6732 | 40   | 32     | 21    | 100   | 19   | 35   | 10   | 25    | 37   |
| 6733 | 50   | 17     | 14    | 29.5  | 20   | 18   | 12   | 14    | 36.5 |
| 6734 | 53.5 | 48     | 26    | 135   | 29   | 48   | 17   | 38    | 50.5 |
| 6735 | 80   | 54     | 28    | 108   | 27   | 56   | 19   | 38    | 49   |
| 6736 | 24   | 13     | 9     | 19    | 11   | 15   | 7    | 14    | 5    |
| 6737 | 1788 | 1191.5 | 414.5 | 692   | 271  | 966  | 331  | 1012  | 861  |
| 6738 | 52   | 41     | 24    | 120.5 | 19   | 51.5 | 11   | 33    | 37   |
| 6739 | 66   | 13     | 7     | 20    | 13   | 14.5 | 15   | 21    | 18   |
| 6740 | 39   | 41     | 25    | 124.5 | 20   | 48   | 12   | 37    | 41   |
| 6741 | 34   | 16     | 11    | 31    | 32   | 19   | 8    | 18.5  | 12   |
| 6742 | 23   | 10     | 10    | 22    | 11   | 14   | 6    | 12    | 2.5  |
| 6743 | 42   | 34     | 20    | 89    | 23   | 44   | 9    | 25    | 32   |
| 6744 | 28   | 13     | 12    | 31    | 16   | 17   | 9    | 21    | 5.5  |
| 6745 | 40   | 38     | 23    | 121   | 22   | 45   | 11   | 30    | 43.5 |
| 6746 | 20   | 13     | 7.5   | 27    | 12   | 14.5 | 5    | 11    | 5    |
| 6747 | 54   | 57.5   | 36    | 133   | 34   | 51   | 19   | 46    | 61   |
| 6748 | 25   | 12     | 7     | 22    | 13   | 16   | 6    | 13    | 3    |
| 6749 | 57   | 70     | 27    | 159   | 60   | 51   | 22   | 44    | 52   |
| 6750 | 22   | 14     | 8     | 27    | 14   | 16   | 7    | 32    | 20   |
| 6751 | 47   | 55     | 28    | 129   | 103  | 46   | 18   | 48    | 66   |
| 6752 | 33   | 17.5   | 11    | 27    | 15   | 18.5 | 9    | 17    | 19   |
| 6753 | 41   | 39     | 21    | 116   | 21.5 | 39   | 12   | 33.5  | 50   |
| 6754 | 24   | 19     | 12    | 34    | 9.5  | 17   | 12   | 14    | 16   |
| 6755 | 39   | 39     | 23.5  | 114   | 20   | 43   | 10   | 27    | 53   |
| 6756 | 89.5 | 68.5   | 34    | 65    | 44   | 76   | 27   | 72    | 58   |
| 6757 | 39   | 44     | 23    | 114.5 | 27   | 43.5 | 13   | 29    | 92   |
| 6758 | 46   | 46     | 33.5  | 130   | 25   | 44   | 15   | 33    | 68.5 |
| 6759 | 46.5 | 48     | 29.5  | 110.5 | 34   | 43   | 15   | 38    | 57   |
| 6760 | 63   | 35     | 21.5  | 143   | 36   | 39   | 10   | 33    | 41   |
| 6761 | 38   | 22     | 12.5  | 41    | 24   | 27   | 11   | 25    | 28   |
| 6762 | 48   | 36     | 21    | 127   | 18   | 47   | 9    | 33    | 46   |
| 6763 | 75   | 49     | 23    | 56    | 27.5 | 53   | 20.5 | 51    | 46   |
| 6764 | 68   | 70.5   | 36.5  | 141   | 43   | 69   | 26.5 | 68    | 62   |
| 6765 | 36   | 32     | 23    | 105   | 19   | 32.5 | 11   | 29    | 99   |
| 6766 | 58.5 | 34     | 21    | 124   | 31.5 | 40   | 10   | 31    | 37   |

|      |      |      |      |       |      |      |      |      |       |
|------|------|------|------|-------|------|------|------|------|-------|
| 6767 | 87   | 62   | 29   | 64    | 30   | 68   | 37   | 60   | 58    |
| 6768 | 45   | 34   | 20   | 118   | 17   | 44.5 | 10   | 32   | 42    |
| 6769 | 54   | 34.5 | 17   | 50    | 29   | 39.5 | 16   | 58.5 | 82    |
| 6770 | 64   | 56   | 35   | 137.5 | 37   | 73   | 26.5 | 59   | 56    |
| 6771 | 40   | 36   | 24   | 119   | 19   | 43   | 12   | 32   | 96    |
| 6772 | 90   | 67   | 37   | 81    | 34   | 77   | 27.5 | 79   | 89    |
| 6773 | 47   | 44   | 25   | 128   | 29   | 50.5 | 16   | 34   | 53    |
| 6774 | 36   | 34   | 17   | 86    | 19   | 46   | 9    | 32   | 50    |
| 6775 | 34   | 32   | 22   | 124   | 18   | 43   | 10   | 38   | 40    |
| 6776 | 31   | 17   | 10   | 39    | 19   | 19   | 10   | 47.5 | 30    |
| 6777 | 30   | 29   | 20   | 111   | 19   | 37   | 9    | 27   | 33    |
| 6778 | 34   | 22.5 | 14   | 31.5  | 13   | 28   | 7.5  | 20.5 | 14    |
| 6779 | 31   | 29   | 17   | 81.5  | 14   | 35   | 7    | 27   | 24.5  |
| 6780 | 49   | 33   | 26.5 | 184.5 | 19   | 40   | 19   | 47   | 40    |
| 6781 | 29.5 | 24   | 18   | 85    | 24   | 33   | 7    | 19   | 21    |
| 6782 | 78   | 39   | 35   | 67    | 28   | 41   | 17   | 44   | 49    |
| 6783 | 80   | 33.5 | 23   | 152.5 | 22   | 42   | 16   | 34   | 43    |
| 6784 | 42   | 20   | 26.5 | 51    | 15   | 24   | 11   | 20   | 20    |
| 6785 | 73   | 46   | 37   | 65    | 27   | 58   | 22   | 56   | 45.5  |
| 6786 | 53   | 32   | 14   | 56    | 32   | 37   | 13   | 34   | 43    |
| 6787 | 40   | 19   | 11   | 40    | 20   | 22   | 8    | 39   | 92    |
| 6788 | 46   | 15   | 10   | 36    | 15   | 22   | 10   | 21   | 37    |
| 6789 | 88   | 61   | 38   | 70.5  | 28   | 63   | 22.5 | 74   | 71.5  |
| 6790 | 60   | 39   | 23   | 57    | 24   | 41   | 16   | 41   | 39    |
| 6791 | 39   | 22   | 10   | 44    | 24   | 23   | 17   | 24   | 30    |
| 6792 | 46   | 30   | 16.5 | 43    | 67   | 31   | 16.5 | 34   | 48    |
| 6793 | 60   | 39   | 26.5 | 54    | 18   | 45   | 16   | 44   | 41    |
| 6794 | 51   | 24   | 13   | 48    | 16   | 30   | 12   | 29   | 45    |
| 6795 | 60   | 28   | 14.5 | 57    | 21   | 35   | 21   | 40   | 38    |
| 6796 | 54   | 32   | 20.5 | 56    | 25   | 39   | 20   | 43   | 71    |
| 6797 | 49.5 | 19   | 9    | 48    | 17   | 21   | 9    | 27   | 23    |
| 6798 | 58   | 50   | 31   | 111   | 34   | 54   | 15.5 | 41.5 | 66    |
| 6799 | 75   | 50.5 | 26   | 66    | 47   | 54   | 21   | 47.5 | 56    |
| 6800 | 94.5 | 65.5 | 33   | 123   | 36.5 | 96   | 15   | 38   | 72    |
| 6801 | 118  | 71   | 30   | 65    | 31   | 80   | 25   | 64.5 | 81    |
| 6802 | 87   | 60   | 31   | 130.5 | 31   | 91   | 15   | 42   | 75    |
| 6803 | 58   | 39   | 30   | 123   | 53   | 49   | 14.5 | 33   | 133.5 |
| 6804 | 42   | 28   | 10   | 46    | 21   | 25   | 10   | 27   | 28    |
| 6805 | 62   | 37   | 30   | 144   | 25   | 55   | 14   | 37   | 51    |
| 6806 | 108  | 79   | 37   | 81    | 36.5 | 82   | 27   | 86   | 86    |
| 6807 | 50.5 | 39   | 27   | 116   | 28   | 40   | 11   | 26.5 | 41    |
| 6808 | 54   | 33   | 17   | 41.5  | 25   | 35   | 16   | 33   | 41.5  |
| 6809 | 58   | 37   | 30   | 135.5 | 29   | 46   | 11   | 35   | 56    |
| 6810 | 56   | 33   | 20   | 47    | 23.5 | 31   | 14   | 35   | 25    |
| 6811 | 79   | 53   | 28   | 130   | 31   | 116  | 9    | 73   | 67    |
| 6812 | 67   | 50   | 28   | 59    | 30   | 53   | 23   | 48   | 67    |
| 6813 | 45   | 35   | 43   | 105   | 37   | 42   | 11   | 31   | 49.5  |

|      |      |      |      |       |      |      |      |      |      |
|------|------|------|------|-------|------|------|------|------|------|
| 6814 | 71   | 53   | 23   | 60    | 27   | 55   | 19   | 51   | 59   |
| 6815 | 51   | 39   | 36   | 141   | 26   | 43   | 17   | 33   | 39   |
| 6816 | 58   | 39   | 19   | 66    | 19   | 40   | 16   | 40   | 37   |
| 6817 | 31   | 12   | 11   | 39    | 15   | 16   | 8    | 22   | 33   |
| 6818 | 49   | 41   | 28   | 125   | 26   | 46   | 11   | 32   | 55   |
| 6819 | 38   | 22   | 13   | 46    | 16   | 23   | 12   | 23   | 24   |
| 6820 | 58   | 42   | 33   | 150   | 26.5 | 57   | 11   | 37   | 46   |
| 6821 | 52   | 22.5 | 16   | 44.5  | 16   | 26   | 15   | 23   | 24   |
| 6822 | 58   | 36   | 30   | 138   | 40   | 43   | 15   | 38   | 54   |
| 6823 | 46   | 19   | 12   | 39    | 21   | 21   | 11   | 25   | 41   |
| 6824 | 48   | 35   | 32   | 119   | 26   | 44   | 10   | 36   | 47   |
| 6825 | 50   | 31   | 16   | 44    | 19   | 35   | 14   | 34.5 | 26   |
| 6826 | 51   | 42   | 38   | 122.5 | 30   | 51.5 | 13   | 38   | 58   |
| 6827 | 52   | 36   | 18   | 54    | 22   | 41   | 15   | 33   | 39   |
| 6828 | 54   | 23   | 12   | 37    | 19   | 25   | 10   | 40   | 80   |
| 6829 | 54.5 | 55   | 26   | 135   | 32.5 | 51.5 | 16   | 33.5 | 69   |
| 6830 | 32   | 16   | 9    | 38    | 29   | 18.5 | 9    | 19   | 10   |
| 6831 | 45   | 38   | 28   | 97.5  | 25   | 44   | 15   | 27   | 52   |
| 6832 | 45.5 | 29   | 17   | 54    | 28.5 | 32   | 14   | 56.5 | 29   |
| 6833 | 54   | 40   | 30.5 | 109   | 27   | 55   | 11   | 40   | 48   |
| 6834 | 27.5 | 14   | 7.5  | 45    | 25   | 16   | 10   | 32   | 20   |
| 6835 | 45   | 39   | 28   | 109.5 | 24   | 42   | 13   | 29   | 45   |
| 6836 | 54   | 30   | 18   | 50    | 23   | 32   | 15   | 31.5 | 53   |
| 6837 | 50   | 41   | 29.5 | 119   | 25   | 41   | 13   | 30   | 44   |
| 6838 | 46   | 35   | 19   | 42    | 17   | 36   | 14   | 33   | 27.5 |
| 6839 | 53   | 39   | 30   | 116   | 31   | 41   | 18   | 34   | 66   |
| 6840 | 68.5 | 34   | 27   | 140.5 | 30   | 41   | 38.5 | 32   | 71   |
| 6841 | 25   | 13   | 10   | 39    | 13   | 18   | 8    | 39   | 8    |
| 6842 | 39   | 16.5 | 12   | 62    | 23   | 20   | 10   | 26   | 40   |
| 6843 | 64   | 47   | 30   | 124   | 35   | 46   | 16   | 31   | 51   |
| 6844 | 30   | 16   | 9    | 43    | 12   | 20   | 8    | 19.5 | 15.5 |
| 6845 | 54   | 37   | 29   | 123   | 24   | 38.5 | 15   | 27.5 | 49   |
| 6846 | 53.5 | 40   | 30   | 112   | 29   | 44   | 11   | 35   | 53   |
| 6847 | 645  | 119  | 9    | 41    | 26   | 122  | 9    | 31   | 45   |
| 6848 | 48   | 27   | 29   | 83    | 23.5 | 31   | 10   | 24   | 55.5 |
| 6849 | 114  | 73   | 34   | 83    | 41.5 | 76.5 | 35   | 79   | 72   |
| 6850 | 69   | 44   | 21   | 56    | 21   | 46   | 18   | 47   | 50.5 |
| 6851 | 54   | 45   | 26   | 132   | 25.5 | 47   | 15   | 33   | 62   |
| 6852 | 102  | 86.5 | 32   | 97    | 40   | 80   | 27   | 95   | 79   |
| 6853 | 84   | 56   | 44   | 133   | 29   | 84   | 14   | 38   | 85   |
| 6854 | 38   | 31   | 9    | 39    | 16   | 25   | 8    | 28.5 | 20   |
| 6855 | 44.5 | 32   | 25   | 113   | 24   | 39   | 8    | 26   | 49   |
| 6856 | 94   | 66   | 24   | 74    | 25   | 67   | 24   | 90   | 62   |
| 6857 | 83.5 | 64   | 31   | 163   | 32   | 53.5 | 22   | 40   | 59   |
| 6858 | 73   | 43   | 22   | 62    | 27   | 42   | 17   | 45   | 55   |
| 6859 | 30.5 | 15   | 7    | 32    | 15.5 | 16   | 19   | 20   | 26   |
| 6860 | 55   | 37   | 58   | 122.5 | 29   | 45   | 10   | 37   | 58   |

|      |       |       |      |       |      |      |      |      |      |
|------|-------|-------|------|-------|------|------|------|------|------|
| 6861 | 71    | 49.5  | 15   | 53.5  | 16   | 63.5 | 14   | 39   | 40   |
| 6862 | 59    | 41.5  | 26   | 104.5 | 26   | 57   | 9    | 32   | 48   |
| 6863 | 93    | 60    | 23   | 70    | 23   | 59   | 20   | 58.5 | 67   |
| 6864 | 67    | 85.5  | 33   | 167.5 | 42   | 65   | 26   | 55   | 86   |
| 6865 | 145.5 | 109.5 | 49   | 91.5  | 43.5 | 110  | 42   | 150  | 99   |
| 6866 | 72    | 57    | 29   | 124.5 | 31   | 77   | 14   | 39   | 52   |
| 6867 | 41    | 23    | 7    | 37    | 12.5 | 38   | 8    | 28   | 26   |
| 6868 | 75    | 52    | 26   | 57    | 27   | 52   | 17   | 54   | 58   |
| 6869 | 92    | 67    | 30   | 76    | 25   | 66   | 24.5 | 65.5 | 51   |
| 6870 | 53    | 43    | 28   | 110   | 27.5 | 50   | 14   | 30   | 53   |
| 6871 | 72    | 47    | 19.5 | 58    | 23   | 47   | 20   | 47   | 36.5 |
| 6872 | 49    | 41.5  | 26   | 141.5 | 30   | 43   | 15   | 35   | 45   |
| 6873 | 80    | 52    | 21   | 70    | 23   | 54   | 20   | 60   | 68   |
| 6874 | 50    | 37.5  | 28   | 143   | 28   | 39   | 12   | 31   | 68.5 |
| 6875 | 93    | 67    | 31   | 68    | 30   | 71   | 26   | 64.5 | 52   |
| 6876 | 42.5  | 38.5  | 33   | 127   | 23   | 37.5 | 10   | 28   | 45   |
| 6877 | 21    | 10    | 6    | 32    | 11   | 13   | 8    | 12   | 4    |
| 6878 | 24    | 11    | 6    | 28.5  | 84   | 13.5 | 6    | 13   | 11   |
| 6879 | 49    | 31    | 24.5 | 123   | 26   | 40   | 10   | 35   | 96   |
| 6880 | 19    | 11    | 7    | 34    | 10   | 14   | 6    | 16   | 6    |
| 6881 | 49    | 30    | 24   | 93.5  | 24   | 39   | 9    | 31   | 41   |
| 6882 | 34    | 13    | 6    | 30.5  | 235  | 12   | 49   | 14   | 9    |
| 6883 | 47.5  | 39    | 27   | 119   | 27   | 43   | 25   | 35.5 | 42   |
| 6884 | 23    | 8     | 6    | 23    | 38.5 | 12   | 9    | 10   | 6    |
| 6885 | 66.5  | 38    | 28   | 122   | 35   | 45   | 14   | 42   | 65   |
| 6886 | 29    | 11    | 9    | 40    | 17   | 17   | 14   | 17   | 14   |
| 6887 | 50    | 45    | 30   | 126.5 | 26   | 39   | 12   | 31   | 46   |
| 6888 | 22    | 9     | 7    | 30    | 13   | 12   | 8    | 11   | 8    |
| 6889 | 55.5  | 59    | 30   | 142.5 | 31   | 45   | 22   | 34   | 56   |
| 6890 | 21    | 11    | 6    | 27    | 16   | 13   | 6    | 14   | 4    |
| 6891 | 37    | 26    | 21   | 86.5  | 15   | 34   | 8    | 25   | 29   |
| 6892 | 24    | 15    | 8    | 29    | 12   | 15   | 6    | 13   | 25   |
| 6893 | 39    | 27.5  | 23   | 86    | 28   | 36   | 7.5  | 21   | 28.5 |
| 6894 | 43    | 17    | 6.5  | 32    | 15   | 36   | 8    | 14   | 11   |
| 6895 | 35    | 28    | 23   | 83.5  | 17   | 35   | 7    | 22   | 26   |
| 6896 | 28    | 9     | 8    | 26    | 24   | 15   | 12   | 15   | 6    |
| 6897 | 38.5  | 27    | 21   | 99    | 17   | 34   | 7    | 21   | 37   |
| 6898 | 36    | 14.5  | 8    | 29    | 15   | 16   | 7    | 12   | 76   |
| 6899 | 45    | 37    | 29   | 145.5 | 21   | 39   | 11   | 31   | 42   |
| 6900 | 40    | 13    | 9    | 36    | 17   | 13   | 8    | 18   | 6    |
| 6901 | 33.5  | 30    | 24   | 105   | 15   | 35   | 8    | 25   | 28   |
| 6902 | 33.5  | 12    | 10   | 20.5  | 50   | 12   | 7    | 17   | 14   |
| 6903 | 37    | 35    | 21.5 | 97    | 19   | 29   | 10   | 27   | 27   |
| 6904 | 17    | 8     | 5    | 17.5  | 7    | 10   | 5    | 7    | 2    |
| 6905 | 34    | 26.5  | 19   | 76    | 15   | 33   | 7    | 22   | 23   |
| 6906 | 79    | 27    | 32   | 128.5 | 45.5 | 58   | 165  | 551  | 14   |
| 6907 | 39    | 28    | 22   | 107.5 | 16   | 36   | 9    | 21   | 26   |

|      |       |      |      |      |      |      |      |      |      |
|------|-------|------|------|------|------|------|------|------|------|
| 6908 | 23    | 9    | 8    | 18   | 10   | 12   | 8    | 25   | 8    |
| 6909 | 50    | 18   | 12   | 30   | 18   | 23   | 15   | 17   | 7    |
| 6910 | 34    | 28   | 20   | 86.5 | 15   | 34   | 7    | 19.5 | 28   |
| 6911 | 22    | 9    | 6    | 29   | 10   | 11   | 8    | 12   | 9    |
| 6912 | 33    | 23   | 22   | 89   | 17   | 28   | 6    | 19   | 27   |
| 6913 | 20    | 9    | 6    | 25.5 | 14   | 10   | 6    | 12   | 6    |
| 6914 | 37    | 26   | 41   | 95   | 16   | 35   | 8    | 23   | 23   |
| 6915 | 20    | 7    | 5    | 26   | 23   | 10   | 5    | 14   | 47   |
| 6916 | 35    | 24   | 24   | 75   | 16   | 29   | 8    | 18   | 26   |
| 6917 | 30    | 10   | 59   | 51   | 105  | 13   | 25   | 14   | 30   |
| 6918 | 29    | 18   | 20   | 59   | 13   | 23   | 6    | 17   | 27   |
| 6919 | 25    | 29   | 9    | 48   | 17   | 18.5 | 9    | 36   | 99   |
| 6920 | 51.5  | 28   | 19   | 73   | 18   | 38   | 8.5  | 20   | 28   |
| 6921 | 31    | 15.5 | 9.5  | 45   | 15   | 19   | 11   | 24   | 101  |
| 6922 | 33    | 25   | 17   | 54   | 14   | 31   | 5    | 17   | 22   |
| 6923 | 31    | 11   | 11   | 21.5 | 16   | 15   | 19   | 13   | 5    |
| 6924 | 36    | 24   | 19   | 85.5 | 18   | 31   | 7    | 19   | 27   |
| 6925 | 62    | 16   | 27   | 53   | 31   | 25   | 23   | 64   | 26   |
| 6926 | 42.5  | 28   | 18   | 67   | 29   | 34   | 7    | 21   | 37.5 |
| 6927 | 18    | 9    | 9    | 28   | 11   | 10   | 10   | 12   | 8    |
| 6928 | 36    | 25   | 21   | 103  | 18   | 35   | 9    | 19   | 29   |
| 6929 | 111   | 10   | 9    | 17   | 12   | 10   | 9    | 17.5 | 13   |
| 6930 | 48    | 55   | 27   | 157  | 25   | 48   | 16   | 33.5 | 47.5 |
| 6931 | 28    | 9    | 11   | 21.5 | 15   | 10   | 8    | 14   | 37   |
| 6932 | 31    | 24.5 | 15   | 49   | 12   | 28   | 5    | 16.5 | 21   |
| 6933 | 33.5  | 28   | 15   | 49.5 | 14   | 35   | 6    | 17   | 23   |
| 6934 | 27    | 9    | 12   | 19   | 16   | 10   | 6    | 11   | 7    |
| 6935 | 55    | 29.5 | 23   | 128  | 311  | 39   | 25   | 48   | 44   |
| 6936 | 17    | 8    | 5.5  | 21   | 6    | 9    | 6    | 12   | 3    |
| 6937 | 50.5  | 39   | 27   | 157  | 47   | 38   | 18   | 41   | 46   |
| 6938 | 19    | 11   | 27   | 21   | 13   | 8.5  | 10   | 9    | 2    |
| 6939 | 46.5  | 26   | 24   | 114  | 17   | 35.5 | 9    | 31   | 30   |
| 6940 | 25    | 9    | 5    | 26   | 8    | 9    | 5    | 11   | 3    |
| 6941 | 54    | 33   | 29   | 74   | 45.5 | 42.5 | 33   | 32   | 46   |
| 6942 | 20    | 8.5  | 7    | 67   | 8    | 17   | 5    | 33.5 | 3    |
| 6943 | 15    | 8    | 6    | 20   | 8    | 10   | 6    | 10   | 2    |
| 6944 | 90    | 30   | 26   | 69   | 26   | 35   | 34.5 | 42   | 26   |
| 6945 | 17    | 8    | 5    | 25   | 8    | 10   | 5    | 11   | 6    |
| 6946 | 53.5  | 30   | 25.5 | 95   | 43   | 46   | 10   | 28   | 34   |
| 6947 | 25    | 11   | 25   | 21   | 25   | 11   | 12   | 12   | 5    |
| 6948 | 259.5 | 34   | 42   | 102  | 38   | 40   | 13   | 38   | 34   |
| 6949 | 33    | 10   | 9    | 27   | 113  | 12   | 20   | 13   | 7    |
| 6950 | 110   | 35   | 25   | 70.5 | 23.5 | 39   | 12   | 30   | 106  |
| 6951 | 44    | 8    | 9    | 16   | 13   | 11   | 9    | 10   | 5    |
| 6952 | 30    | 11   | 14   | 57   | 18   | 11   | 22   | 13   | 10   |
| 6953 | 40    | 26.5 | 19   | 66   | 22   | 34   | 11   | 24   | 26   |
| 6954 | 38.5  | 14   | 9    | 19   | 24   | 27   | 14   | 12   | 8    |

|      |       |      |      |       |       |      |      |      |       |
|------|-------|------|------|-------|-------|------|------|------|-------|
| 6955 | 37    | 24   | 18   | 83    | 20    | 32   | 9    | 25   | 28    |
| 6956 | 19    | 10   | 7    | 13    | 12    | 19   | 7    | 12   | 4     |
| 6957 | 41    | 27   | 18   | 71    | 18    | 30   | 10   | 22   | 38    |
| 6958 | 52    | 7    | 7    | 19    | 11    | 9    | 173  | 10   | 6     |
| 6959 | 63    | 27   | 20   | 68.5  | 22    | 33   | 10   | 26   | 24    |
| 6960 | 47    | 10   | 9    | 40    | 12    | 11   | 8    | 23   | 36.5  |
| 6961 | 60    | 30   | 19   | 75    | 30    | 35.5 | 9    | 22   | 29    |
| 6962 | 36    | 11   | 10   | 43    | 13    | 14   | 14   | 28.5 | 7     |
| 6963 | 93    | 27   | 28   | 75.5  | 73    | 39.5 | 8    | 26   | 53    |
| 6964 | 20    | 13   | 6    | 23    | 11    | 9    | 7    | 16   | 30    |
| 6965 | 406.5 | 118  | 37   | 355   | 51.5  | 515  | 32   | 150  | 144.5 |
| 6966 | 69    | 21.5 | 13   | 77    | 18.5  | 27   | 10   | 65.5 | 31    |
| 6967 | 36.5  | 59   | 26   | 144   | 16    | 23   | 19   | 27   | 29    |
| 6968 | 25    | 9    | 19   | 29    | 9     | 12   | 9    | 15.5 | 4     |
| 6969 | 30.5  | 23   | 16   | 73    | 27    | 30   | 5    | 17.5 | 22    |
| 6970 | 34    | 13   | 9    | 32    | 15    | 15   | 10   | 14   | 13    |
| 6971 | 34    | 23   | 19   | 78    | 16    | 29   | 7    | 21   | 26    |
| 6972 | 52.5  | 27.5 | 15   | 48    | 17    | 27   | 13   | 24   | 25    |
| 6973 | 99    | 74.5 | 23   | 172   | 60    | 54   | 19   | 37   | 51    |
| 6974 | 41    | 23   | 14   | 50    | 17    | 26   | 14   | 36   | 21    |
| 6975 | 71    | 34   | 22   | 64.5  | 25.5  | 46.5 | 28   | 28   | 56    |
| 6976 | 22    | 11   | 15   | 30    | 15    | 13   | 6    | 15   | 19    |
| 6977 | 81    | 93   | 52   | 285.5 | 68    | 77   | 19   | 522  | 63    |
| 6978 | 24    | 11   | 13   | 36    | 11    | 12   | 9    | 15   | 20    |
| 6979 | 41    | 33   | 23   | 78.5  | 555.5 | 35   | 24.5 | 30.5 | 48.5  |
| 6980 | 35    | 20   | 13   | 35    | 15    | 23   | 11   | 24   | 26    |
| 6981 | 60    | 29   | 24   | 95.5  | 18    | 36   | 10   | 36   | 86    |
| 6982 | 19    | 9    | 6    | 25    | 10    | 9    | 6    | 13   | 26    |
| 6983 | 39    | 31   | 21.5 | 133.5 | 16    | 36   | 8    | 29   | 50    |
| 6984 | 77    | 53   | 29   | 57    | 25    | 55   | 23   | 53   | 55    |
| 6985 | 37    | 23   | 17   | 89    | 17    | 33   | 6    | 17   | 25    |
| 6986 | 35    | 23   | 11   | 38    | 14    | 21   | 23   | 24   | 29    |
| 6987 | 38    | 33   | 19   | 101.5 | 18    | 37   | 9    | 22   | 51.5  |
| 6988 | 52.5  | 28   | 16.5 | 50    | 16    | 29.5 | 13   | 30   | 32    |
| 6989 | 37.5  | 27   | 19   | 88    | 14    | 32.5 | 8    | 27   | 26    |
| 6990 | 32    | 14   | 9    | 27    | 10    | 16   | 10   | 18   | 63    |
| 6991 | 38    | 36   | 21   | 108   | 17    | 36   | 9    | 22   | 58.5  |
| 6992 | 41    | 28.5 | 15.5 | 45.5  | 16    | 26   | 16   | 37   | 30    |
| 6993 | 35    | 27   | 19   | 62    | 28    | 37   | 9    | 21   | 26    |
| 6994 | 36.5  | 25   | 18   | 68    | 21    | 31   | 6    | 23   | 24    |
| 6995 | 66    | 46   | 23   | 48.5  | 24    | 50   | 17   | 47   | 47    |
| 6996 | 60    | 31   | 33   | 115.5 | 23.5  | 43   | 11   | 34   | 36    |
| 6997 | 21    | 9    | 10   | 30    | 12    | 13   | 9    | 13   | 20    |
| 6998 | 46    | 32   | 24   | 76.5  | 21    | 39   | 12   | 30   | 98    |
| 6999 | 42    | 29   | 17   | 43    | 16    | 28   | 12   | 31   | 33    |
| 7000 | 73    | 27   | 22   | 63    | 19    | 32   | 10   | 25   | 29    |
| 7001 | 32    | 16   | 11   | 30    | 12    | 16   | 8    | 17   | 44    |

|      |      |      |      |       |      |      |      |      |      |
|------|------|------|------|-------|------|------|------|------|------|
| 7002 | 76   | 34   | 25   | 75    | 60.5 | 66   | 10   | 42   | 40   |
| 7003 | 92   | 65   | 29   | 57    | 27   | 71   | 23   | 60   | 61.5 |
| 7004 | 57.5 | 26   | 19   | 66    | 36   | 32   | 11   | 21   | 28   |
| 7005 | 62   | 24.5 | 21   | 78    | 126  | 33.5 | 13   | 25   | 31   |
| 7006 | 34   | 11   | 14   | 45    | 12   | 12.5 | 12   | 17   | 18   |
| 7007 | 54.5 | 28   | 23   | 89.5  | 43   | 39   | 15   | 39   | 36   |
| 7008 | 56.5 | 35   | 23   | 108   | 20   | 37   | 11   | 27   | 121  |
| 7009 | 68   | 32   | 17   | 45    | 17   | 35.5 | 14   | 37   | 30   |
| 7010 | 46.5 | 25   | 30.5 | 67    | 24   | 35   | 11   | 26   | 46   |
| 7011 | 26   | 12   | 9    | 26    | 12   | 15   | 10   | 17   | 42.5 |
| 7012 | 44   | 28   | 19.5 | 61    | 18   | 36   | 7    | 24   | 24.5 |
| 7013 | 44   | 12   | 14   | 39.5  | 16   | 12   | 11   | 20   | 46   |
| 7014 | 38   | 25.5 | 28   | 106   | 16   | 29   | 6    | 24.5 | 23   |
| 7015 | 61   | 44   | 26   | 143   | 29.5 | 47   | 12   | 37   | 44   |
| 7016 | 20   | 8    | 6    | 20    | 8    | 9    | 6    | 11   | 20   |
| 7017 | 47.5 | 39   | 25   | 105   | 29.5 | 45   | 12   | 30   | 41   |
| 7018 | 82   | 51   | 29   | 63    | 29   | 55.5 | 26   | 54.5 | 50   |
| 7019 | 67   | 56   | 29   | 140.5 | 24   | 43.5 | 16   | 38.5 | 87.5 |
| 7020 | 18.5 | 8    | 5    | 30    | 623  | 9    | 5    | 11   | 16   |
| 7021 | 51   | 42   | 24   | 96    | 23   | 49   | 11.5 | 27   | 60   |
| 7022 | 43   | 37   | 22   | 104.5 | 20   | 36   | 10   | 27   | 41   |
| 7023 | 41   | 15   | 12   | 43    | 28   | 18   | 10   | 19   | 23   |
| 7024 | 43   | 38   | 22   | 162   | 22   | 36   | 16   | 29   | 40   |
| 7025 | 39   | 24   | 13   | 40    | 18   | 27   | 11   | 37   | 36   |
| 7026 | 62   | 44   | 26   | 60    | 22   | 43   | 19   | 46   | 58   |
| 7027 | 47   | 25.5 | 16   | 57    | 17   | 31   | 15   | 36   | 42   |
| 7028 | 61   | 41   | 23   | 61.5  | 22   | 42   | 21   | 47   | 86   |
| 7029 | 38.5 | 29   | 20   | 102   | 20   | 34   | 9    | 24   | 29   |
| 7030 | 37   | 24   | 14   | 42    | 18   | 25   | 12   | 29   | 49.5 |
| 7031 | 38   | 31   | 25   | 106   | 18   | 32   | 9    | 27   | 51   |
| 7032 | 22   | 10   | 8    | 34    | 11   | 14   | 9    | 16   | 19   |
| 7033 | 60   | 64.5 | 24   | 149   | 27.5 | 65   | 16   | 38   | 84   |
| 7034 | 43.5 | 39   | 22   | 106   | 21   | 35   | 12   | 24   | 37   |
| 7035 | 65   | 47   | 26   | 57.5  | 27   | 50   | 21   | 50   | 58.5 |
| 7036 | 42   | 39   | 22   | 120   | 21   | 40   | 13   | 27   | 38   |
| 7037 | 49   | 30.5 | 18   | 39.5  | 16   | 32   | 14   | 32   | 31   |
| 7038 | 67   | 44   | 22   | 54    | 23   | 43   | 20   | 53   | 52   |
| 7039 | 52   | 41   | 27.5 | 130   | 25   | 40   | 14   | 33   | 54   |
| 7040 | 41.5 | 36   | 19   | 115   | 20   | 35   | 9    | 30   | 57.5 |
| 7041 | 61   | 41.5 | 21   | 60    | 20   | 45   | 18   | 43.5 | 42.5 |
| 7042 | 40   | 30   | 21   | 115.5 | 19   | 32   | 24   | 25.5 | 39   |
| 7043 | 55   | 38   | 20   | 48    | 22   | 38.5 | 15   | 38   | 47   |
| 7044 | 64.5 | 40.5 | 22   | 110   | 55   | 40   | 11   | 29.5 | 41.5 |
| 7045 | 50   | 32   | 18.5 | 47    | 18   | 31   | 16   | 34   | 33   |
| 7046 | 42   | 43   | 25   | 126   | 28   | 40   | 15   | 30.5 | 47   |
| 7047 | 47   | 23   | 13   | 34    | 13   | 21   | 23   | 24   | 26   |
| 7048 | 40   | 44.5 | 24   | 121   | 26   | 39   | 13   | 38   | 46   |



|      |       |      |      |       |      |      |      |      |      |
|------|-------|------|------|-------|------|------|------|------|------|
| 7049 | 68    | 14   | 8    | 40.5  | 10   | 15   | 9    | 17   | 16   |
| 7050 | 56.5  | 43   | 21.5 | 113.5 | 71   | 39   | 12   | 29.5 | 63   |
| 7051 | 48    | 30   | 15.5 | 50    | 18   | 33   | 16   | 33   | 37   |
| 7052 | 49.5  | 38   | 35   | 120   | 30   | 42   | 12   | 28.5 | 50   |
| 7053 | 41    | 21   | 15   | 44    | 15   | 22   | 12   | 27   | 22   |
| 7054 | 48    | 31   | 23   | 134   | 23   | 36   | 14   | 30   | 42   |
| 7055 | 38    | 28   | 21   | 92    | 18   | 32   | 9    | 26   | 36   |
| 7056 | 26    | 9    | 8    | 27    | 14   | 10   | 9    | 13   | 15   |
| 7057 | 44.5  | 33   | 22   | 128   | 22   | 36   | 9    | 24   | 61   |
| 7058 | 60    | 36   | 25   | 48    | 75   | 38   | 20   | 38   | 39   |
| 7059 | 54    | 68.5 | 31   | 156   | 47   | 49   | 25   | 37   | 51   |
| 7060 | 36    | 15   | 9    | 33.5  | 12   | 18   | 9    | 18   | 20   |
| 7061 | 60    | 37   | 25   | 116   | 24   | 36   | 13   | 34   | 65   |
| 7062 | 17    | 8    | 8    | 39.5  | 8    | 9    | 6    | 14   | 4    |
| 7063 | 38.5  | 31   | 20   | 107   | 20   | 35   | 8    | 23.5 | 90   |
| 7064 | 21    | 10   | 7    | 33    | 14   | 11   | 6    | 15   | 12   |
| 7065 | 35    | 21   | 13   | 56    | 12   | 24   | 10   | 33   | 33.5 |
| 7066 | 56    | 37   | 26   | 109   | 22   | 41.5 | 11   | 35   | 43   |
| 7067 | 30    | 16   | 11.5 | 33    | 13   | 16   | 8    | 16   | 13   |
| 7068 | 42    | 34   | 26   | 122   | 26   | 34   | 10   | 31   | 43.5 |
| 7069 | 55.5  | 21   | 12   | 68    | 19.5 | 31.5 | 13   | 59   | 41   |
| 7070 | 43    | 31   | 21   | 122.5 | 21   | 36   | 8    | 26   | 30.5 |
| 7071 | 25    | 14.5 | 10   | 33    | 13   | 18   | 8    | 16   | 12   |
| 7072 | 48    | 38   | 27   | 138   | 27   | 37   | 15   | 41   | 41   |
| 7073 | 63.5  | 52.5 | 24   | 128   | 24   | 71.5 | 11   | 32   | 43   |
| 7074 | 30    | 23   | 18   | 54    | 14   | 23   | 29   | 45   | 65.5 |
| 7075 | 45    | 25   | 22   | 85.5  | 18   | 30.5 | 9    | 21   | 38   |
| 7076 | 31    | 16   | 7    | 20    | 12   | 21   | 5    | 12   | 3    |
| 7077 | 36    | 31   | 23   | 101.5 | 22   | 34   | 11   | 26   | 30   |
| 7078 | 18    | 14   | 8    | 18    | 13   | 18   | 8    | 15   | 3    |
| 7079 | 44.5  | 42   | 23   | 131.5 | 31   | 45   | 13   | 34   | 46   |
| 7080 | 36    | 16   | 12   | 28.5  | 17   | 21   | 29   | 19   | 5    |
| 7081 | 46    | 32   | 24   | 105   | 26   | 34   | 10   | 27   | 57   |
| 7082 | 41    | 33   | 24   | 106   | 20   | 38.5 | 11   | 26   | 56   |
| 7083 | 476   | 466  | 14.5 | 35    | 18   | 1988 | 39.5 | 62   | 147  |
| 7084 | 50.5  | 58   | 25   | 181   | 34.5 | 45   | 20   | 34   | 90   |
| 7085 | 20    | 12   | 6    | 16    | 809  | 16.5 | 14   | 11   | 4.5  |
| 7086 | 37.5  | 36   | 20   | 117   | 27   | 35.5 | 11   | 24   | 40   |
| 7087 | 38.5  | 28.5 | 22   | 109   | 24   | 33.5 | 8    | 25   | 31.5 |
| 7088 | 43    | 44   | 22   | 120.5 | 23.5 | 40   | 12   | 30   | 65   |
| 7089 | 38    | 14   | 9    | 17    | 19   | 14   | 6.5  | 14   | 5    |
| 7090 | 32.5  | 26   | 20   | 86    | 24   | 30   | 10   | 20   | 32.5 |
| 7091 | 36    | 16   | 9    | 29    | 18   | 17   | 31.5 | 18   | 16   |
| 7092 | 111.5 | 55   | 22   | 116   | 20   | 97   | 10   | 33.5 | 43   |
| 7093 | 43    | 18   | 10   | 23    | 30   | 19   | 12   | 19   | 10   |
| 7094 | 47    | 53   | 25   | 124.5 | 27   | 42   | 17   | 33   | 71.5 |
| 7095 | 32    | 79   | 20.5 | 66    | 13   | 54   | 18   | 338  | 8    |

|      |       |       |      |       |      |        |       |       |      |
|------|-------|-------|------|-------|------|--------|-------|-------|------|
| 7096 | 34    | 28    | 19   | 73    | 17   | 35     | 7     | 24    | 24   |
| 7097 | 23.5  | 11    | 7    | 31    | 10   | 17.5   | 9     | 15    | 4    |
| 7098 | 37    | 29    | 23   | 89.5  | 16   | 39     | 14    | 74    | 25   |
| 7099 | 22    | 12    | 11   | 21    | 10.5 | 15     | 9     | 12    | 3    |
| 7100 | 29    | 22    | 18   | 77    | 17   | 28     | 8     | 22.5  | 22   |
| 7101 | 65.5  | 19    | 11   | 33    | 21   | 26     | 13    | 21    | 19   |
| 7102 | 43    | 24    | 18   | 59.5  | 17   | 28     | 5.5   | 17    | 21   |
| 7103 | 19    | 12    | 5    | 23    | 10   | 14     | 8     | 15    | 7    |
| 7104 | 55    | 26    | 17.5 | 71.5  | 16.5 | 33     | 12    | 20    | 26   |
| 7105 | 19    | 10    | 7    | 28    | 10   | 14     | 7     | 12    | 3    |
| 7106 | 30    | 20    | 18   | 93.5  | 16   | 25     | 5     | 16    | 42   |
| 7107 | 257.5 | 32    | 50   | 158   | 43   | 40     | 15    | 42    | 56   |
| 7108 | 33    | 18.5  | 16   | 40    | 34   | 23     | 11    | 23    | 17   |
| 7109 | 28    | 23    | 16   | 49    | 15   | 28     | 6     | 16    | 21   |
| 7110 | 62.5  | 44.5  | 33   | 73    | 25   | 47     | 20.5  | 45    | 40   |
| 7111 | 42    | 28    | 23   | 72.5  | 18   | 38     | 8     | 24    | 25   |
| 7112 | 44    | 27.5  | 17   | 51    | 16   | 30     | 11    | 29    | 36   |
| 7113 | 55    | 23    | 19   | 66.5  | 16   | 29.5   | 9     | 20    | 27   |
| 7114 | 35    | 18    | 11   | 37    | 23   | 19     | 13    | 19.5  | 18   |
| 7115 | 31    | 22    | 16   | 63.5  | 15   | 29     | 6     | 22    | 22   |
| 7116 | 28    | 15    | 8.5  | 40    | 15   | 22     | 9     | 22    | 28   |
| 7117 | 22    | 14    | 15   | 57    | 13   | 13     | 6     | 17    | 34   |
| 7118 | 90.5  | 69    | 34   | 73    | 47   | 70.5   | 31    | 70    | 62   |
| 7119 | 41    | 22    | 16   | 71    | 59.5 | 27     | 10    | 24    | 25   |
| 7120 | 29.5  | 23    | 18   | 70    | 21   | 28     | 6     | 29.5  | 22   |
| 7121 | 37    | 25    | 18   | 63    | 18   | 31     | 10    | 22    | 23   |
| 7122 | 56    | 44    | 34   | 57    | 22   | 46     | 19    | 45    | 51.5 |
| 7123 | 1152  | 215.5 | 27   | 121.5 | 35   | 1639   | 25    | 178.5 | 396  |
| 7124 | 1044  | 255   | 37.5 | 145   | 38   | 1746.5 | 33    | 199.5 | 441  |
| 7125 | 54    | 37.5  | 19   | 57    | 19   | 38     | 19    | 44    | 37   |
| 7126 | 34    | 21.5  | 20   | 84    | 38.5 | 28.5   | 7     | 26    | 32   |
| 7127 | 45    | 25    | 16   | 50.5  | 24   | 29.5   | 38    | 36    | 20   |
| 7128 | 45.5  | 46    | 27   | 99.5  | 33   | 55     | 14    | 39.5  | 43.5 |
| 7129 | 56    | 41    | 24   | 60.5  | 25.5 | 43     | 133.5 | 44    | 37.5 |
| 7130 | 54    | 38    | 26   | 82    | 40   | 47.5   | 12    | 29    | 114  |
| 7131 | 52    | 41    | 26.5 | 82.5  | 59   | 52.5   | 11    | 40    | 36   |
| 7132 | 130   | 123   | 57   | 95.5  | 51   | 119    | 48    | 119   | 127  |
| 7133 | 26    | 16    | 9.5  | 38    | 11.5 | 18     | 8.5   | 22    | 35   |
| 7134 | 30    | 23    | 15.5 | 43.5  | 14   | 25     | 14    | 22    | 39   |
| 7135 | 37    | 22    | 13   | 54    | 15   | 23     | 12    | 27    | 23   |
| 7136 | 27    | 15    | 9    | 47    | 12   | 19     | 6     | 22    | 18   |
| 7137 | 52    | 42.5  | 16   | 62    | 23   | 30     | 17    | 39.5  | 28.5 |
| 7138 | 41    | 21.5  | 18   | 60    | 23   | 23     | 13    | 32    | 37   |
| 7139 | 71.5  | 62    | 36   | 80    | 29   | 65     | 27    | 60    | 57.5 |
| 7140 | 36.5  | 22.5  | 9    | 32    | 13   | 22     | 8     | 23    | 19   |
| 7141 | 63    | 50    | 31   | 67    | 26.5 | 50     | 23    | 53    | 68   |
| 7142 | 84    | 65    | 34   | 76    | 30   | 67     | 25    | 75    | 64   |

|      |      |      |    |       |      |      |    |      |      |
|------|------|------|----|-------|------|------|----|------|------|
| 7143 | 46   | 30   | 18 | 52    | 17   | 32   | 41 | 34   | 28   |
| 7144 | 59.5 | 40.5 | 21 | 68.5  | 24   | 44   | 19 | 48   | 31   |
| 7145 | 28   | 17   | 10 | 43.5  | 12   | 20   | 8  | 21   | 12   |
| 7146 | 42   | 34   | 21 | 53    | 18   | 33   | 15 | 69.5 | 38.5 |
| 7147 | 35   | 25   | 13 | 49    | 20   | 26   | 14 | 30   | 26   |
| 7148 | 19   | 10   | 6  | 40    | 10   | 14   | 6  | 17   | 4    |
| 7149 | 17   | 11   | 10 | 40    | 8    | 15   | 7  | 18   | 5    |
| 7150 | 16   | 9    | 8  | 25    | 12   | 13   | 17 | 19   | 3    |
| 7151 | 67   | 58   | 27 | 138.5 | 28   | 77.5 | 15 | 40   | 83.5 |
| 7152 | 19   | 11   | 7  | 28    | 11   | 15   | 10 | 13.5 | 4    |
| 7153 | 49   | 39   | 27 | 110.5 | 27   | 51   | 12 | 31   | 40   |
| 7154 | 17   | 11   | 7  | 26    | 29   | 16   | 29 | 24   | 6    |
| 7155 | 47   | 55   | 30 | 130   | 30   | 53   | 18 | 39   | 57   |
| 7156 | 38.5 | 10   | 17 | 24    | 14   | 12   | 12 | 19   | 7    |
| 7157 | 54.5 | 54   | 31 | 114.5 | 32   | 51.5 | 20 | 35   | 79.5 |
| 7158 | 40   | 42   | 28 | 93    | 33   | 48   | 11 | 28   | 56   |
| 7159 | 30   | 17   | 9  | 21    | 12   | 18   | 9  | 26   | 113  |
| 7160 | 45   | 42   | 26 | 112   | 22   | 44   | 9  | 31   | 36   |
| 7161 | 38   | 10   | 8  | 41    | 13   | 15   | 70 | 29   | 31   |
| 7162 | 69.5 | 59   | 28 | 121.5 | 31   | 53   | 17 | 43   | 53.5 |
| 7163 | 37   | 22   | 60 | 68    | 106  | 28   | 34 | 31   | 26   |
| 7164 | 54   | 68   | 31 | 133   | 43   | 57   | 22 | 41   | 93   |
| 7165 | 18   | 10   | 10 | 24    | 10   | 10   | 6  | 13   | 7    |
| 7166 | 32.5 | 13   | 11 | 18    | 13   | 15   | 13 | 15.5 | 6    |
| 7167 | 58.5 | 49   | 26 | 132.5 | 28   | 71.5 | 13 | 37   | 53.5 |
| 7168 | 42   | 12.5 | 11 | 26    | 19   | 14   | 8  | 11   | 6    |
| 7169 | 53   | 41   | 29 | 121   | 25.5 | 48   | 14 | 33   | 44   |
| 7170 | 21.5 | 11   | 8  | 44.5  | 17.5 | 13   | 9  | 13   | 26   |
| 7171 | 63   | 66   | 33 | 147   | 35   | 59.5 | 20 | 40   | 64   |
| 7172 | 22   | 14   | 13 | 23    | 12.5 | 18   | 16 | 17   | 5    |
| 7173 | 57   | 53   | 28 | 126   | 36   | 61   | 16 | 37   | 58   |
| 7174 | 55.5 | 32   | 18 | 57    | 43   | 36   | 18 | 32   | 24   |
| 7175 | 50   | 53   | 28 | 108   | 29   | 53   | 17 | 34   | 61   |
| 7176 | 14   | 9    | 7  | 19    | 10   | 11   | 5  | 10   | 2    |
| 7177 | 53   | 53   | 28 | 122   | 29   | 50   | 15 | 38   | 62   |
| 7178 | 12   | 9    | 5  | 7     | 6    | 10   | 5  | 7    | 1    |
| 7179 | 49   | 50.5 | 27 | 134.5 | 30   | 49   | 14 | 35   | 57   |
| 7180 | 121  | 23   | 10 | 40    | 17   | 27   | 16 | 20   | 26   |
| 7181 | 66   | 50   | 28 | 121.5 | 29   | 50.5 | 16 | 35   | 54   |
| 7182 | 60.5 | 39   | 20 | 51    | 23   | 45   | 15 | 33   | 40   |
| 7183 | 51   | 41   | 25 | 101   | 29   | 48   | 11 | 29   | 57   |
| 7184 | 78   | 41   | 18 | 50    | 23   | 38.5 | 18 | 43   | 32.5 |
| 7185 | 34   | 15   | 9  | 27.5  | 15   | 22   | 7  | 23   | 22   |
| 7186 | 62   | 55   | 33 | 141.5 | 182  | 62   | 15 | 39   | 73   |
| 7187 | 47   | 26   | 13 | 51.5  | 18   | 32   | 13 | 34   | 51   |
| 7188 | 59.5 | 65.5 | 30 | 154.5 | 34   | 52   | 21 | 36   | 68   |
| 7189 | 54   | 33   | 18 | 38    | 16   | 33.5 | 13 | 38.5 | 31   |

|      |       |       |      |       |      |       |      |       |      |
|------|-------|-------|------|-------|------|-------|------|-------|------|
| 7190 | 38.5  | 37    | 31   | 112   | 39   | 35    | 13   | 42    | 37   |
| 7191 | 47.5  | 17.5  | 16   | 54    | 16   | 20    | 9    | 24    | 22   |
| 7192 | 48    | 45    | 28   | 100   | 29   | 44    | 16   | 33    | 78.5 |
| 7193 | 53    | 50    | 29   | 131   | 34   | 48    | 18   | 39    | 69   |
| 7194 | 63    | 42    | 23   | 49    | 24   | 48.5  | 34   | 44    | 44   |
| 7195 | 57    | 44    | 28   | 111.5 | 29   | 61.5  | 11   | 74    | 51   |
| 7196 | 49    | 18    | 10   | 41    | 16   | 23    | 8    | 22    | 29   |
| 7197 | 48    | 53    | 26.5 | 121   | 27   | 50    | 17   | 36.5  | 56   |
| 7198 | 41    | 17    | 9    | 35    | 33   | 19    | 10   | 19    | 16   |
| 7199 | 62    | 48.5  | 28   | 122.5 | 27   | 57.5  | 16   | 37    | 80   |
| 7200 | 125   | 106.5 | 49   | 77.5  | 43   | 103.5 | 36   | 87    | 104  |
| 7201 | 48    | 43    | 29   | 146   | 24.5 | 47    | 13   | 34    | 57.5 |
| 7202 | 88.5  | 67    | 23.5 | 81    | 24   | 57.5  | 22   | 60    | 52   |
| 7203 | 40    | 35    | 22   | 104   | 22   | 45    | 10   | 30    | 37   |
| 7204 | 40    | 38    | 24   | 103   | 23   | 44    | 11   | 44    | 38   |
| 7205 | 34    | 16    | 10   | 42    | 12   | 22    | 11   | 21    | 12   |
| 7206 | 38    | 38    | 23   | 105   | 20   | 44    | 9    | 28    | 39   |
| 7207 | 77    | 60    | 27   | 58    | 25   | 51    | 24   | 49    | 56   |
| 7208 | 54    | 37    | 26   | 96    | 23   | 39    | 11   | 29    | 44   |
| 7209 | 83    | 66    | 33   | 64    | 27   | 68    | 26   | 63    | 58   |
| 7210 | 55    | 46    | 23.5 | 126.5 | 23   | 54    | 13   | 34    | 47   |
| 7211 | 71    | 48    | 27   | 59    | 26   | 54    | 18.5 | 49    | 56   |
| 7212 | 47    | 30    | 21   | 82    | 21   | 46    | 9    | 22.5  | 62   |
| 7213 | 101.5 | 78    | 35.5 | 78.5  | 36   | 83    | 30.5 | 114.5 | 62   |
| 7214 | 59    | 42    | 35.5 | 169.5 | 33   | 59    | 28   | 55    | 54   |
| 7215 | 65.5  | 39    | 20   | 47    | 22   | 40    | 16   | 44    | 34   |
| 7216 | 38.5  | 32    | 26   | 102   | 25   | 41    | 12   | 28    | 32   |
| 7217 | 352.5 | 470.5 | 268  | 588   | 316  | 314   | 453  | 2496  | 249  |
| 7218 | 161   | 24    | 13   | 67    | 22   | 28    | 38   | 43    | 42.5 |
| 7219 | 54    | 35    | 20.5 | 87    | 305  | 40    | 10   | 35    | 32   |
| 7220 | 36    | 19    | 8    | 30    | 14   | 19    | 11   | 17    | 21   |
| 7221 | 43    | 34    | 24   | 140   | 24   | 39    | 10   | 45    | 43.5 |
| 7222 | 50    | 16    | 13   | 44.5  | 18   | 20    | 12   | 29    | 22   |
| 7223 | 40    | 42    | 22   | 122   | 17   | 44    | 11   | 33    | 81   |
| 7224 | 97    | 72    | 31   | 72    | 30   | 80    | 30   | 68    | 64.5 |
| 7225 | 37    | 18    | 12.5 | 43    | 15   | 21    | 8    | 20    | 37   |
| 7226 | 63    | 41    | 26.5 | 124.5 | 23   | 47    | 11.5 | 49    | 78   |
| 7227 | 35    | 19.5  | 7    | 42    | 12   | 23.5  | 9    | 31    | 16   |
| 7228 | 62    | 39    | 26   | 143   | 32   | 53    | 21.5 | 43.5  | 49   |
| 7229 | 38    | 16    | 10   | 39    | 17   | 19    | 7    | 20.5  | 26.5 |
| 7230 | 37    | 39    | 24   | 82    | 24   | 44    | 10   | 23    | 54   |
| 7231 | 32    | 17    | 9    | 47    | 16   | 20    | 7    | 22.5  | 15   |
| 7232 | 54.5  | 42    | 23   | 91    | 32   | 66    | 11   | 32    | 35   |
| 7233 | 40    | 15    | 11   | 38    | 12   | 18    | 10   | 19    | 8    |
| 7234 | 87    | 43    | 28   | 87    | 31   | 53    | 14.5 | 35    | 80   |
| 7235 | 38    | 24    | 12.5 | 37    | 15   | 23.5  | 12   | 22    | 34   |
| 7236 | 38    | 30.5  | 28   | 71    | 29   | 38    | 7    | 22    | 201  |

|      |       |      |      |       |      |      |      |      |      |
|------|-------|------|------|-------|------|------|------|------|------|
| 7237 | 77    | 24   | 16   | 53    | 33   | 28   | 14   | 32   | 37.5 |
| 7238 | 34.5  | 29   | 19   | 50    | 36   | 37   | 8    | 20   | 23   |
| 7239 | 48    | 38   | 25   | 81    | 33   | 44   | 13   | 31.5 | 35   |
| 7240 | 43    | 35   | 24   | 142   | 31   | 41   | 292  | 47   | 89   |
| 7241 | 42    | 19   | 16   | 44    | 12   | 19   | 12   | 23   | 36   |
| 7242 | 40.5  | 33   | 27   | 155   | 31   | 40.5 | 11   | 38   | 33   |
| 7243 | 35    | 16   | 8    | 41    | 19   | 17   | 8    | 19   | 25   |
| 7244 | 39    | 35   | 25   | 95    | 23   | 41   | 13.5 | 40.5 | 37   |
| 7245 | 43    | 31   | 9    | 44    | 15   | 17   | 8    | 40   | 23   |
| 7246 | 39    | 32   | 24   | 83.5  | 22   | 45   | 7    | 24   | 85   |
| 7247 | 42    | 28   | 12   | 44    | 20   | 34   | 15   | 27   | 44   |
| 7248 | 48    | 32   | 25   | 104   | 24   | 41   | 9    | 31   | 42   |
| 7249 | 30    | 12.5 | 12   | 35    | 11   | 15   | 8    | 17.5 | 22   |
| 7250 | 38    | 30   | 24   | 109.5 | 22   | 38   | 8    | 32   | 37   |
| 7251 | 38    | 37   | 23   | 88    | 18.5 | 42   | 9    | 24   | 88   |
| 7252 | 38.5  | 19   | 19.5 | 30    | 14   | 24   | 10   | 25   | 42.5 |
| 7253 | 44    | 26   | 13   | 50    | 18   | 26.5 | 10   | 27.5 | 24.5 |
| 7254 | 38    | 16   | 10   | 37    | 13   | 21   | 10   | 22   | 41   |
| 7255 | 37    | 15   | 11   | 30    | 15   | 20   | 7    | 17   | 52   |
| 7256 | 115.5 | 75.5 | 46   | 87    | 38   | 79.5 | 30.5 | 82   | 89   |
| 7257 | 53    | 38   | 21   | 47.5  | 20   | 39   | 17   | 40   | 44   |
| 7258 | 69    | 42   | 21   | 58    | 21   | 51.5 | 18   | 48   | 80   |
| 7259 | 66    | 18   | 19   | 38    | 13   | 22   | 9    | 26   | 54   |
| 7260 | 43    | 22   | 12   | 42    | 15   | 25.5 | 12   | 25   | 22   |
| 7261 | 37    | 20   | 11   | 35.5  | 12   | 26   | 7    | 25   | 31   |
| 7262 | 37    | 19   | 9    | 32.5  | 9    | 15.5 | 7    | 22   | 35   |
| 7263 | 38    | 14.5 | 9    | 40    | 216  | 16   | 9    | 20.5 | 33   |
| 7264 | 59    | 37   | 19   | 48    | 21   | 40   | 18   | 52   | 31   |
| 7265 | 104   | 92.5 | 49   | 72.5  | 38   | 93   | 40   | 87   | 95   |
| 7266 | 70    | 47.5 | 20   | 66    | 24   | 51   | 22   | 77   | 55.5 |
| 7267 | 56    | 33   | 20   | 52    | 20   | 36   | 15   | 39   | 49   |
| 7268 | 95.5  | 74.5 | 32   | 66    | 29   | 72   | 29   | 74   | 82.5 |
| 7269 | 20.5  | 9.5  | 6    | 24    | 11   | 11   | 7    | 11   | 3.5  |
| 7270 | 22    | 11   | 8    | 23    | 14   | 15   | 6    | 17   | 5    |
| 7271 | 22    | 11   | 7    | 26    | 8    | 12   | 5    | 11   | 10   |
| 7272 | 28    | 12   | 11   | 18    | 9    | 12.5 | 7    | 11   | 5    |
| 7273 | 57    | 19   | 15   | 80    | 251  | 30   | 59   | 66   | 29.5 |
| 7274 | 50    | 11   | 22   | 16    | 12   | 14   | 7    | 11   | 13   |
| 7275 | 50    | 17   | 13   | 26    | 13   | 34   | 11   | 127  | 22   |
| 7276 | 34.5  | 13.5 | 7.5  | 36    | 8    | 17   | 6    | 27.5 | 13   |
| 7277 | 18    | 8    | 5    | 21    | 12   | 10   | 5    | 10   | 6    |
| 7278 | 33    | 10   | 23   | 18    | 23   | 13   | 9    | 12   | 7    |
| 7279 | 35    | 13   | 9    | 29    | 22   | 16   | 9    | 14   | 10   |
| 7280 | 28    | 13   | 8    | 23    | 165  | 14   | 9    | 13   | 7    |
| 7281 | 28    | 14   | 8    | 13    | 14   | 16   | 9    | 11   | 7    |
| 7282 | 61    | 38.5 | 18   | 55    | 19   | 42   | 14   | 48.5 | 34   |
| 7283 | 67    | 32   | 14   | 62    | 26   | 35   | 14   | 53   | 44   |

|      |      |      |      |      |        |      |      |      |      |
|------|------|------|------|------|--------|------|------|------|------|
| 7284 | 46   | 20   | 9    | 48.5 | 12     | 21   | 9    | 31   | 30.5 |
| 7285 | 84.5 | 61.5 | 24   | 78   | 23     | 51   | 25   | 73.5 | 53   |
| 7286 | 28   | 12   | 8    | 34.5 | 11     | 15   | 9    | 26   | 39.5 |
| 7287 | 98   | 51.5 | 19.5 | 70   | 27     | 47   | 19   | 61.5 | 62   |
| 7288 | 48   | 28.5 | 10   | 50   | 16     | 30   | 11   | 37.5 | 19.5 |
| 7289 | 35   | 19   | 11   | 51   | 16     | 20.5 | 8    | 36   | 18   |
| 7290 | 47   | 21   | 11.5 | 55   | 15     | 23   | 10.5 | 41   | 27   |
| 7291 | 64   | 31.5 | 13   | 54   | 16     | 32   | 13   | 45   | 34   |
| 7292 | 20   | 8    | 5    | 27   | 11     | 11.5 | 6    | 10   | 6    |
| 7293 | 20   | 8    | 5.5  | 26   | 11     | 9    | 6    | 13   | 4    |
| 7294 | 19   | 10   | 5.5  | 17   | 17.5   | 12   | 6    | 12   | 2    |
| 7295 | 28.5 | 13   | 9.5  | 68   | 12     | 19   | 11   | 58   | 20   |
| 7296 | 24   | 9    | 7    | 20   | 12     | 11   | 6    | 12   | 11   |
| 7297 | 28   | 9    | 23   | 43   | 10     | 12   | 8    | 15   | 4    |
| 7298 | 32   | 12   | 8    | 19   | 9      | 13   | 7    | 14   | 10   |
| 7299 | 32   | 17   | 8    | 44   | 18     | 19   | 18   | 15   | 4    |
| 7300 | 17   | 8    | 7    | 15.5 | 10     | 11   | 6    | 10   | 7    |
| 7301 | 22.5 | 10   | 5    | 11   | 12     | 10   | 7    | 9    | 5    |
| 7302 | 68   | 13   | 10   | 63   | 27     | 18   | 11   | 63   | 110  |
| 7303 | 54   | 13   | 22   | 34   | 18     | 12.5 | 15   | 14   | 7    |
| 7304 | 28   | 14   | 10   | 51.5 | 18     | 20   | 8    | 94   | 8    |
| 7305 | 25   | 10   | 7    | 24   | 8      | 11   | 5    | 11   | 14   |
| 7306 | 21   | 9    | 10.5 | 34   | 11     | 11   | 10   | 13   | 5    |
| 7307 | 18   | 8    | 5    | 31.5 | 8      | 10   | 6    | 12   | 7    |
| 7308 | 20   | 8    | 7    | 39   | 10     | 10   | 7    | 12   | 6    |
| 7309 | 27.5 | 11   | 20   | 53   | 16     | 15   | 21   | 36   | 9    |
| 7310 | 29   | 9    | 8    | 16   | 14     | 10   | 15   | 9    | 18   |
| 7311 | 69   | 14   | 12   | 37.5 | 19     | 13.5 | 9    | 31   | 7    |
| 7312 | 44   | 11   | 9    | 65.5 | 19     | 13   | 13   | 19   | 14   |
| 7313 | 23   | 9    | 7    | 21   | 13     | 10   | 29.5 | 9    | 9    |
| 7314 | 24   | 8    | 9    | 16   | 11     | 10   | 6    | 13   | 4    |
| 7315 | 46   | 16   | 17   | 42   | 10.5   | 17   | 7    | 17   | 23.5 |
| 7316 | 35   | 11   | 17   | 85   | 18     | 14   | 52   | 47   | 48   |
| 7317 | 701  | 545  | 29   | 54   | 57     | 2309 | 22   | 73   | 632  |
| 7318 | 450  | 9    | 9    | 19   | 11     | 11   | 9    | 14   | 17   |
| 7319 | 30.5 | 10   | 10   | 17   | 14     | 11   | 9    | 15   | 4    |
| 7320 | 29   | 8    | 8    | 47   | 10     | 10   | 9    | 19   | 6    |
| 7321 | 21   | 7    | 5.5  | 20   | 8      | 10   | 5    | 9    | 4    |
| 7322 | 46   | 14   | 9.5  | 48   | 12     | 21   | 10   | 164  | 5    |
| 7323 | 23.5 | 10   | 7    | 43.5 | 12.5   | 11   | 8    | 28   | 49   |
| 7324 | 156  | 26   | 21   | 34   | 31     | 21   | 11   | 21.5 | 56   |
| 7325 | 38   | 8    | 7    | 26   | 155    | 12   | 8    | 20   | 19   |
| 7326 | 49   | 9.5  | 6    | 23   | 1335.5 | 10   | 8    | 14   | 19   |
| 7327 | 14   | 6    | 5.5  | 8    | 6      | 8    | 5    | 6    | 2    |
| 7328 | 24   | 8    | 5.5  | 24   | 10     | 11   | 7    | 14   | 6    |
| 7329 | 43   | 9    | 9    | 17.5 | 14     | 10   | 7    | 12   | 5    |
| 7330 | 30   | 10   | 10   | 26   | 14     | 14   | 39   | 16   | 65   |

|      |      |      |      |      |      |      |      |      |      |
|------|------|------|------|------|------|------|------|------|------|
| 7331 | 24   | 7    | 8    | 23   | 17   | 12   | 7    | 15   | 19   |
| 7332 | 34   | 10   | 23   | 31   | 33.5 | 12   | 12   | 24   | 59   |
| 7333 | 28   | 12   | 29   | 39   | 16   | 16   | 8    | 52   | 21   |
| 7334 | 27   | 9    | 7    | 25   | 10   | 10   | 10   | 58   | 4    |
| 7335 | 26   | 7    | 7    | 22   | 10   | 8    | 6    | 11   | 15   |
| 7336 | 29   | 11   | 7    | 33   | 12   | 12   | 8    | 16   | 99   |
| 7337 | 59   | 33.5 | 12   | 35   | 18   | 26   | 11   | 26   | 26   |
| 7338 | 34   | 18   | 11   | 31   | 14   | 18   | 12.5 | 23   | 19   |
| 7339 | 50.5 | 27   | 14.5 | 37   | 15   | 29.5 | 14   | 29   | 23   |
| 7340 | 25   | 11   | 14   | 30.5 | 11   | 15   | 9    | 17   | 23   |
| 7341 | 26   | 10   | 8    | 31   | 10   | 12.5 | 7    | 15   | 11   |
| 7342 | 44   | 17   | 10.5 | 38   | 14   | 15   | 9    | 18   | 16.5 |
| 7343 | 34   | 16   | 10   | 38   | 15   | 15   | 9    | 18   | 19   |
| 7344 | 58   | 34   | 20   | 44   | 16   | 38   | 13   | 35   | 46.5 |
| 7345 | 58   | 39   | 24   | 48   | 19   | 42   | 17   | 50.5 | 49   |
| 7346 | 38   | 22   | 8    | 33   | 13   | 22   | 8    | 19   | 31   |
| 7347 | 31   | 13   | 10   | 30   | 15   | 16   | 7    | 19.5 | 18   |
| 7348 | 43   | 24   | 11   | 43.5 | 15   | 26   | 11   | 26   | 22   |
| 7349 | 24   | 8    | 6    | 28   | 9    | 11   | 5    | 15   | 6    |
| 7350 | 59   | 35.5 | 16   | 39   | 20   | 39   | 34   | 36   | 44   |
| 7351 | 36   | 13   | 10   | 45   | 14   | 16   | 8    | 25.5 | 8    |
| 7352 | 25   | 10   | 6    | 30   | 7    | 9.5  | 5    | 13   | 7    |
| 7353 | 69   | 41   | 18   | 48   | 233  | 45   | 17   | 46   | 39.5 |
| 7354 | 54   | 31   | 16   | 40   | 15   | 34   | 13   | 31   | 27   |
| 7355 | 24   | 11   | 6    | 30.5 | 9    | 12   | 7    | 15   | 17   |
| 7356 | 35   | 23   | 10   | 39   | 12   | 22   | 8    | 21   | 23   |
| 7357 | 30   | 18   | 10   | 30   | 13   | 18   | 8    | 20.5 | 21   |
| 7358 | 46   | 24   | 12.5 | 31   | 15   | 24   | 16   | 23   | 23   |
| 7359 | 23   | 8    | 8    | 33.5 | 8    | 10   | 8    | 12   | 62   |
| 7360 | 32   | 21   | 10   | 32   | 16   | 32   | 8    | 14   | 18   |
| 7361 | 22.5 | 10   | 7    | 29   | 9    | 9    | 6    | 11   | 22   |
| 7362 | 99   | 68   | 35   | 67   | 34   | 65   | 26   | 60   | 83.5 |
| 7363 | 49   | 26.5 | 16.5 | 46.5 | 19   | 29   | 15   | 36   | 32   |
| 7364 | 31.5 | 18   | 9    | 37   | 14   | 19   | 9.5  | 23   | 24   |
| 7365 | 74   | 51   | 23   | 67   | 22   | 49   | 19   | 52   | 46   |
| 7366 | 21   | 9    | 7    | 36   | 9    | 10   | 8    | 18   | 7    |
| 7367 | 26   | 19   | 11   | 56   | 15   | 29.5 | 6    | 16   | 25   |
| 7368 | 32   | 15   | 9    | 39   | 8.5  | 18   | 7    | 18   | 38   |
| 7369 | 34.5 | 18   | 8    | 37.5 | 9    | 19   | 7    | 17   | 35   |
| 7370 | 39   | 11   | 9    | 41.5 | 16   | 13   | 8    | 18   | 18   |
| 7371 | 28   | 11   | 9    | 30.5 | 12   | 14   | 9    | 17   | 20   |
| 7372 | 24   | 14   | 7    | 38   | 17   | 14   | 7    | 18   | 18   |
| 7373 | 29   | 14   | 9    | 36   | 14   | 15   | 7    | 16   | 38   |
| 7374 | 25.5 | 12   | 7    | 30   | 11   | 15   | 6    | 16.5 | 20   |
| 7375 | 22   | 15   | 6    | 29   | 13   | 16   | 7    | 15   | 78   |
| 7376 | 37   | 25   | 9    | 45   | 13   | 25.5 | 8    | 18   | 40   |
| 7377 | 60   | 33   | 20   | 53   | 21   | 34   | 17   | 43   | 61.5 |

|      |      |      |      |       |      |      |      |      |      |
|------|------|------|------|-------|------|------|------|------|------|
| 7378 | 57.5 | 33   | 19   | 45    | 19   | 35   | 16.5 | 39   | 58   |
| 7379 | 31   | 15   | 10   | 32    | 14   | 16   | 8    | 19   | 17   |
| 7380 | 52.5 | 30   | 32   | 54    | 26   | 31   | 14   | 36   | 28   |
| 7381 | 40.5 | 19.5 | 10   | 44.5  | 12   | 20.5 | 10   | 33   | 20   |
| 7382 | 73   | 48   | 20.5 | 55    | 23   | 50   | 21   | 54   | 81   |
| 7383 | 42   | 11   | 15.5 | 46    | 18   | 13   | 9    | 17.5 | 19   |
| 7384 | 38   | 43.5 | 21   | 71    | 24   | 46   | 16   | 30.5 | 46.5 |
| 7385 | 127  | 53   | 44   | 193.5 | 29.5 | 64   | 76   | 433  | 48   |
| 7386 | 39.5 | 36.5 | 21   | 70    | 29   | 47   | 14   | 28   | 46   |
| 7387 | 37   | 49   | 27   | 84    | 28   | 51   | 18.5 | 36   | 49   |
| 7388 | 63   | 44   | 249  | 108.5 | 42   | 59   | 16   | 27   | 45   |
| 7389 | 89.5 | 85   | 62   | 138.5 | 38   | 76.5 | 32   | 69.5 | 86   |
| 7390 | 51.5 | 49   | 29   | 79.5  | 32   | 53   | 25   | 47.5 | 38.5 |
| 7391 | 39.5 | 41   | 18   | 68    | 22   | 38   | 15   | 26   | 32   |
| 7392 | 43   | 46   | 25   | 74    | 29   | 53   | 20   | 34   | 50   |
| 7393 | 25   | 27   | 20   | 58.5  | 15   | 33.5 | 10   | 14   | 35   |
| 7394 | 80.5 | 50   | 20   | 71    | 21   | 39   | 10   | 23   | 23   |
| 7395 | 41   | 38   | 11   | 28    | 15.5 | 53   | 7    | 12   | 24   |
| 7396 | 30   | 19   | 35   | 122   | 21   | 23.5 | 10.5 | 26.5 | 56   |
| 7397 | 21   | 26   | 9    | 22    | 13.5 | 36   | 13   | 11   | 15   |
| 7398 | 54.5 | 47   | 23.5 | 67    | 28   | 60   | 16   | 35   | 44   |
| 7399 | 33.5 | 32   | 15   | 39    | 23   | 39   | 9    | 16   | 26   |
| 7400 | 26   | 25.5 | 13   | 42.5  | 19   | 33.5 | 7    | 14   | 33   |
| 7401 | 48   | 45   | 21   | 92    | 25   | 43   | 14   | 31   | 60   |
| 7402 | 30   | 25   | 12   | 80    | 20   | 38   | 10   | 16   | 21   |
| 7403 | 27   | 26   | 9    | 32    | 16   | 35.5 | 6    | 10   | 16   |
| 7404 | 60   | 30   | 36   | 77    | 31   | 39   | 15   | 49   | 38   |
| 7405 | 66   | 27   | 13   | 46    | 21.5 | 37   | 10   | 20   | 28   |
| 7406 | 23   | 27   | 12   | 34    | 25   | 39   | 8    | 12   | 17   |
| 7407 | 26   | 25   | 12   | 41    | 17   | 34.5 | 7    | 12.5 | 18   |
| 7408 | 39.5 | 29   | 14   | 82    | 29   | 41   | 11   | 30   | 79.5 |
| 7409 | 38   | 33   | 20.5 | 78    | 22.5 | 42   | 14   | 28.5 | 31   |
| 7410 | 27   | 28   | 15   | 48.5  | 14   | 35.5 | 8    | 21   | 19   |
| 7411 | 81   | 34   | 23   | 63    | 34.5 | 47   | 14   | 68   | 33   |
| 7412 | 43   | 43   | 23   | 59    | 22   | 45.5 | 20   | 36   | 43   |
| 7413 | 60   | 89.5 | 39   | 86    | 40.5 | 69   | 31   | 68   | 85   |
| 7414 | 35   | 43   | 22   | 68    | 24   | 43   | 16   | 37   | 51   |
| 7415 | 99.5 | 36   | 18   | 57.5  | 19   | 44.5 | 13   | 25   | 25.5 |
| 7416 | 32   | 28   | 14   | 68.5  | 17   | 34   | 9    | 19   | 43   |
| 7417 | 26   | 24   | 12   | 50    | 18   | 38   | 10   | 14   | 22   |
| 7418 | 84   | 73   | 31   | 75    | 24   | 75   | 23   | 43   | 61   |
| 7419 | 30   | 27   | 20   | 47    | 16   | 36   | 9    | 16   | 33   |
| 7420 | 25   | 25   | 13   | 69.5  | 13   | 34   | 10.5 | 19   | 52   |
| 7421 | 32   | 24   | 14.5 | 74    | 19   | 35   | 8    | 19   | 51   |
| 7422 | 57   | 50   | 23   | 82.5  | 29   | 47   | 18   | 38   | 53   |
| 7423 | 36   | 26   | 15   | 57    | 17   | 32   | 9    | 20   | 23.5 |
| 7424 | 32   | 26   | 15   | 61    | 17.5 | 39.5 | 12   | 21   | 29   |



|      |      |      |      |      |      |       |      |      |      |
|------|------|------|------|------|------|-------|------|------|------|
| 7425 | 49.5 | 42   | 22   | 72   | 23   | 40    | 18.5 | 35   | 59   |
| 7426 | 32   | 33   | 19   | 80   | 18   | 42.5  | 14   | 28.5 | 30   |
| 7427 | 22   | 20   | 12   | 56   | 13   | 28    | 6    | 15   | 15.5 |
| 7428 | 38.5 | 56   | 39   | 69   | 26   | 48    | 16   | 39   | 50   |
| 7429 | 28   | 36.5 | 18   | 71   | 17   | 34    | 14   | 25   | 52   |
| 7430 | 41.5 | 27   | 16   | 55   | 22.5 | 34    | 11   | 34   | 22   |
| 7431 | 29   | 22   | 21   | 74   | 15   | 32    | 8    | 19   | 26   |
| 7432 | 41   | 38   | 23   | 59.5 | 16.5 | 41.5  | 14   | 28   | 44   |
| 7433 | 35   | 23   | 14   | 67   | 14   | 37.5  | 8    | 16   | 33.5 |
| 7434 | 29   | 24   | 17   | 55   | 16   | 37    | 8    | 28   | 29   |
| 7435 | 30   | 38   | 20   | 102  | 22   | 36    | 20   | 33   | 34   |
| 7436 | 31   | 29   | 18   | 57   | 18.5 | 36    | 11   | 23   | 27   |
| 7437 | 27   | 22   | 14   | 48.5 | 24   | 31    | 8    | 19   | 29   |
| 7438 | 32   | 35   | 18   | 62   | 20   | 36    | 14   | 25   | 34   |
| 7439 | 27   | 27   | 15   | 48   | 17   | 38    | 10   | 19   | 25   |
| 7440 | 39   | 28   | 22   | 67   | 21   | 26.5  | 15   | 25   | 33   |
| 7441 | 36   | 46.5 | 24   | 68   | 24   | 43    | 17   | 35   | 47.5 |
| 7442 | 30   | 32   | 18   | 62   | 18   | 35    | 13   | 26.5 | 35   |
| 7443 | 33.5 | 42   | 20   | 62   | 22   | 39    | 13   | 27   | 37   |
| 7444 | 43   | 57   | 27   | 78   | 36   | 56    | 23.5 | 55   | 70   |
| 7445 | 40   | 41.5 | 22   | 66   | 20   | 44    | 14   | 29   | 33   |
| 7446 | 29   | 26   | 15   | 68   | 16.5 | 33    | 10   | 27   | 29   |
| 7447 | 36.5 | 53   | 24.5 | 58   | 25   | 34    | 23   | 42   | 59.5 |
| 7448 | 37.5 | 46   | 21   | 69   | 22   | 38    | 16   | 41   | 49   |
| 7449 | 38.5 | 25   | 14   | 60.5 | 16   | 45    | 8    | 16   | 23   |
| 7450 | 59.5 | 66   | 38   | 97.5 | 35.5 | 57    | 28   | 58   | 77   |
| 7451 | 28   | 22   | 15   | 88   | 14   | 32    | 9.5  | 21   | 32.5 |
| 7452 | 29   | 26   | 16   | 57.5 | 18   | 39    | 13.5 | 19   | 19.5 |
| 7453 | 24   | 22   | 11   | 64   | 17   | 30    | 8    | 39   | 15   |
| 7454 | 28   | 23   | 20   | 47   | 15   | 30.5  | 6    | 15   | 19   |
| 7455 | 22   | 25.5 | 11   | 48   | 14   | 31    | 9    | 14   | 14   |
| 7456 | 43.5 | 23   | 20.5 | 35   | 22.5 | 31    | 10   | 58   | 27   |
| 7457 | 28.5 | 24   | 16   | 113  | 22   | 33.5  | 12   | 23   | 27   |
| 7458 | 29   | 26   | 15   | 108  | 28.5 | 35    | 17   | 20.5 | 36.5 |
| 7459 | 27   | 23.5 | 15   | 76   | 17.5 | 33    | 8    | 18   | 16.5 |
| 7460 | 34   | 18   | 9    | 49   | 13   | 25    | 7    | 12   | 15   |
| 7461 | 30.5 | 23   | 14   | 53   | 17   | 33    | 6    | 13   | 14.5 |
| 7462 | 28.5 | 18   | 7    | 22   | 18   | 25    | 7    | 11   | 10   |
| 7463 | 22   | 23   | 10   | 56   | 14   | 30    | 7    | 17   | 36   |
| 7464 | 25   | 23   | 18   | 81   | 16.5 | 32    | 8    | 20   | 20   |
| 7465 | 28   | 20   | 12   | 66   | 15   | 31    | 7    | 14   | 18   |
| 7466 | 26   | 21   | 10   | 37   | 33.5 | 33    | 9.5  | 32   | 14   |
| 7467 | 25   | 22.5 | 9    | 40.5 | 17   | 30.5  | 11   | 13   | 14   |
| 7468 | 24   | 24   | 11   | 31   | 17   | 31    | 18   | 19   | 17   |
| 7469 | 76.5 | 30   | 17   | 45   | 22.5 | 40    | 9    | 14   | 37.5 |
| 7470 | 131  | 106  | 48   | 80.5 | 61   | 114.5 | 37   | 99.5 | 95.5 |
| 7471 | 77   | 55   | 20   | 48   | 26   | 69    | 15.5 | 46   | 51   |

|      |       |       |      |       |      |       |      |      |      |
|------|-------|-------|------|-------|------|-------|------|------|------|
| 7472 | 114   | 75    | 28   | 61    | 40.5 | 83    | 25   | 69   | 70   |
| 7473 | 98.5  | 76    | 36   | 66    | 59.5 | 85.5  | 27.5 | 88   | 83.5 |
| 7474 | 176.5 | 51    | 22   | 64.5  | 29   | 65    | 19   | 54   | 57   |
| 7475 | 69    | 57    | 18.5 | 52    | 27   | 69    | 19   | 61   | 48   |
| 7476 | 128   | 85    | 37   | 80    | 48   | 91    | 30   | 94.5 | 59   |
| 7477 | 129   | 45    | 16   | 52    | 32   | 58    | 15   | 46   | 39   |
| 7478 | 65    | 32    | 10   | 52    | 50   | 33.5  | 8    | 20   | 69.5 |
| 7479 | 96    | 69.5  | 26   | 67    | 40.5 | 75.5  | 22   | 56   | 78   |
| 7480 | 100   | 84.5  | 32   | 80    | 178  | 89    | 28   | 82   | 67   |
| 7481 | 85    | 33    | 9    | 41    | 17   | 40    | 8    | 38   | 32   |
| 7482 | 46    | 34    | 15   | 50    | 38   | 39    | 10   | 29.5 | 77   |
| 7483 | 90    | 71    | 28   | 64.5  | 44   | 82    | 22   | 64   | 56   |
| 7484 | 47    | 34    | 13   | 44    | 29   | 43    | 11   | 32   | 26   |
| 7485 | 203   | 168.5 | 81   | 113.5 | 61   | 181   | 76   | 155  | 146  |
| 7486 | 40.5  | 32    | 14   | 47    | 31   | 35    | 10   | 26   | 28   |
| 7487 | 79    | 51    | 26   | 56.5  | 36.5 | 53    | 17   | 40   | 63.5 |
| 7488 | 65.5  | 45.5  | 26   | 48    | 24.5 | 53    | 13   | 54   | 21   |
| 7489 | 140   | 113   | 51.5 | 98    | 50   | 121.5 | 41   | 128  | 102  |
| 7490 | 49.5  | 31.5  | 12   | 53    | 27   | 41    | 10   | 38   | 19   |
| 7491 | 50    | 33    | 13   | 49    | 27   | 42    | 10   | 30   | 21   |
| 7492 | 93    | 64    | 28   | 62.5  | 98   | 65.5  | 29   | 58   | 90   |
| 7493 | 70    | 50    | 27   | 62    | 31   | 57.5  | 14   | 60   | 49   |
| 7494 | 94    | 65    | 30   | 70    | 32   | 81    | 20   | 64   | 69   |
| 7495 | 51.5  | 30    | 19   | 42    | 33   | 39    | 21   | 24.5 | 23   |
| 7496 | 60    | 37    | 15   | 44    | 26   | 43    | 15   | 36.5 | 35   |
| 7497 | 41    | 30    | 14   | 38    | 26   | 35.5  | 8    | 22   | 25   |
| 7498 | 44    | 32.5  | 10   | 38    | 20   | 39    | 9    | 21   | 18   |
| 7499 | 84    | 59    | 21   | 56    | 51   | 66    | 19   | 46   | 67   |
| 7500 | 34    | 17    | 9    | 30.5  | 20   | 21    | 7    | 21   | 24   |
| 7501 | 57    | 41    | 12   | 50    | 28   | 47    | 14   | 29   | 69   |
| 7502 | 74    | 61.5  | 25   | 78.5  | 40   | 66    | 19   | 52.5 | 69   |
| 7503 | 77.5  | 60    | 26   | 57    | 32   | 68.5  | 19   | 50   | 100  |
| 7504 | 78.5  | 53    | 25   | 58.5  | 47   | 56.5  | 20   | 50   | 64.5 |
| 7505 | 110.5 | 80    | 33   | 78.5  | 48   | 85    | 29   | 70   | 68   |
| 7506 | 94    | 73    | 37   | 67    | 44   | 74    | 24   | 69   | 58   |
| 7507 | 72    | 89    | 22   | 51    | 45   | 59    | 17   | 46   | 60   |
| 7508 | 76.5  | 25    | 8    | 22    | 23   | 30    | 6    | 17   | 4    |
| 7509 | 37    | 25.5  | 10   | 21    | 23   | 35    | 8    | 33   | 4    |
| 7510 | 68    | 44    | 16   | 38.5  | 69   | 54    | 15   | 274  | 11   |
| 7511 | 42    | 24    | 9    | 27    | 14   | 33    | 6    | 17   | 6    |
| 7512 | 30    | 29    | 7    | 26    | 14   | 32    | 7    | 39   | 6    |
| 7513 | 34.5  | 23    | 7    | 22    | 16   | 29.5  | 6    | 16.5 | 8    |
| 7514 | 42    | 21    | 12   | 23    | 51   | 28    | 19.5 | 18   | 7    |
| 7515 | 59    | 25    | 53   | 23    | 445  | 31    | 18   | 24   | 10   |
| 7516 | 51    | 20    | 10   | 19    | 28   | 29    | 9    | 13   | 52   |
| 7517 | 157   | 35    | 21   | 44    | 127  | 39    | 73   | 36   | 27   |
| 7518 | 117   | 26    | 10   | 23    | 24   | 32.5  | 21   | 26   | 20   |

|      |       |       |      |       |       |      |      |      |       |
|------|-------|-------|------|-------|-------|------|------|------|-------|
| 7519 | 245   | 53    | 18.5 | 138.5 | 69.5  | 47   | 22   | 115  | 28    |
| 7520 | 38    | 24    | 13   | 27    | 27    | 34   | 13   | 18   | 13    |
| 7521 | 26    | 15    | 6.5  | 13    | 15    | 18   | 5    | 10   | 6     |
| 7522 | 28    | 22    | 6    | 17    | 13    | 30   | 6    | 11   | 4     |
| 7523 | 32    | 23    | 8    | 29.5  | 53    | 31   | 7    | 13   | 4     |
| 7524 | 27    | 18    | 7    | 13    | 13    | 26   | 6    | 11   | 4     |
| 7525 | 28    | 21    | 8    | 18    | 14    | 27   | 6    | 14   | 4     |
| 7526 | 29    | 25    | 10   | 17.5  | 19    | 32   | 12   | 17   | 11.5  |
| 7527 | 96    | 26    | 17   | 18    | 23    | 33   | 26   | 18   | 72    |
| 7528 | 33    | 23    | 7    | 17    | 50    | 34.5 | 6    | 16   | 3     |
| 7529 | 97    | 27    | 13   | 27    | 24.5  | 30   | 21   | 20.5 | 82.5  |
| 7530 | 59    | 26    | 27   | 45    | 48    | 32   | 53   | 20.5 | 35    |
| 7531 | 64    | 35.5  | 21   | 118   | 290   | 53   | 218  | 456  | 55    |
| 7532 | 71    | 26.5  | 27   | 54    | 617   | 34   | 29   | 23   | 15    |
| 7533 | 53.5  | 30    | 76   | 92    | 78    | 44   | 86   | 113  | 13    |
| 7534 | 48    | 27    | 11   | 53.5  | 23    | 35   | 13   | 31   | 6     |
| 7535 | 46.5  | 21    | 13   | 36    | 13.5  | 23   | 10   | 17   | 35    |
| 7536 | 38    | 24.5  | 9    | 39    | 14    | 34   | 19   | 19   | 13.5  |
| 7537 | 37    | 23    | 8    | 57    | 22    | 31   | 9    | 38.5 | 12    |
| 7538 | 50    | 26    | 10   | 100   | 27.5  | 34   | 22   | 95   | 15    |
| 7539 | 40    | 23    | 8    | 62    | 43    | 29   | 43   | 35   | 11    |
| 7540 | 70    | 26    | 17.5 | 79    | 23    | 39   | 18   | 96.5 | 61    |
| 7541 | 646.5 | 338.5 | 83   | 180.5 | 134   | 293  | 91   | 227  | 264.5 |
| 7542 | 31    | 21    | 9    | 24    | 23.5  | 26   | 6    | 15   | 10    |
| 7543 | 36    | 25    | 19   | 66    | 24    | 32   | 12.5 | 24   | 17.5  |
| 7544 | 46    | 28    | 10   | 44    | 15    | 35   | 11   | 26   | 138   |
| 7545 | 27    | 21.5  | 6    | 21    | 18    | 27   | 5.5  | 13   | 9     |
| 7546 | 45    | 35.5  | 14   | 191   | 20    | 50   | 24   | 117  | 20    |
| 7547 | 44    | 26    | 9    | 58    | 28    | 52   | 10   | 94   | 16    |
| 7548 | 53    | 25    | 13   | 91    | 106   | 38   | 15   | 93.5 | 217   |
| 7549 | 113   | 23    | 17   | 76    | 816   | 30   | 12   | 61.5 | 51    |
| 7550 | 52    | 29    | 9    | 59    | 29.5  | 38   | 11   | 25   | 11    |
| 7551 | 50.5  | 61    | 11   | 37.5  | 21    | 28.5 | 18   | 21   | 127   |
| 7552 | 135   | 25    | 14   | 68    | 48    | 28   | 16   | 26   | 91    |
| 7553 | 74    | 35    | 15   | 71    | 83    | 37   | 21   | 90   | 51    |
| 7554 | 31    | 24    | 8    | 28    | 702.5 | 33   | 11   | 105  | 7     |
| 7555 | 34    | 29.5  | 6    | 9     | 11    | 36   | 6    | 14.5 | 2     |
| 7556 | 62    | 37    | 7    | 13    | 589   | 74   | 7    | 22   | 17    |
| 7557 | 66    | 46    | 22   | 51.5  | 28    | 53   | 23   | 49.5 | 44    |
| 7558 | 48    | 30    | 14   | 33    | 25    | 35   | 11.5 | 24.5 | 24    |
| 7559 | 49    | 32    | 12   | 40    | 22    | 37   | 12   | 26   | 30.5  |
| 7560 | 50    | 29.5  | 12   | 35    | 29    | 35   | 12   | 23.5 | 23    |
| 7561 | 49    | 35    | 33   | 50    | 24    | 40   | 17   | 38   | 26    |
| 7562 | 70    | 36    | 15   | 44    | 21    | 40   | 13   | 33.5 | 55    |
| 7563 | 411.5 | 56    | 26   | 68    | 35.5  | 61   | 21   | 53   | 64    |
| 7564 | 68    | 33    | 13.5 | 50    | 21.5  | 40   | 14   | 33   | 38    |
| 7565 | 63    | 46    | 18   | 42    | 27    | 48   | 15   | 56   | 29    |

|      |      |      |      |      |      |      |      |      |      |
|------|------|------|------|------|------|------|------|------|------|
| 7566 | 37   | 20   | 9    | 43   | 20   | 27.5 | 7    | 22.5 | 22   |
| 7567 | 54   | 24   | 12   | 40   | 24   | 26   | 7    | 21   | 39   |
| 7568 | 48   | 36.5 | 13   | 41   | 20   | 39   | 12   | 31   | 32   |
| 7569 | 42.5 | 25   | 9    | 38   | 20   | 33   | 10.5 | 27   | 29.5 |
| 7570 | 65   | 36   | 15   | 54   | 29   | 41   | 23   | 35   | 28   |
| 7571 | 56   | 39   | 22   | 87   | 22   | 45   | 79.5 | 56   | 47   |
| 7572 | 87   | 64   | 25   | 61.5 | 37   | 80.5 | 23   | 54   | 74   |
| 7573 | 66   | 47   | 18   | 48   | 25   | 54   | 17   | 45   | 61   |
| 7574 | 66   | 44   | 21   | 51   | 26.5 | 44.5 | 17   | 38.5 | 40.5 |
| 7575 | 97   | 64   | 28   | 68   | 42   | 65   | 25   | 81   | 55   |
| 7576 | 43   | 27   | 13   | 45   | 20.5 | 36   | 11   | 46   | 42   |
| 7577 | 73   | 30   | 13   | 44   | 52.5 | 37   | 12   | 28   | 24   |
| 7578 | 50   | 33   | 14   | 49   | 27   | 35   | 15   | 31   | 32   |
| 7579 | 49   | 26   | 30   | 52   | 72   | 29   | 40   | 32   | 17   |
| 7580 | 43   | 23   | 8    | 34   | 19   | 27   | 7    | 20.5 | 12   |
| 7581 | 48   | 28   | 10   | 47.5 | 26   | 34   | 12   | 24   | 39   |
| 7582 | 36   | 16   | 8    | 39   | 15   | 22   | 9    | 15   | 33   |
| 7583 | 34   | 20   | 9    | 32.5 | 21   | 24   | 8    | 20   | 20   |
| 7584 | 34   | 20   | 9    | 37   | 22   | 24   | 8    | 21   | 35   |
| 7585 | 37   | 21   | 10   | 52   | 19   | 26   | 8    | 19   | 28   |
| 7586 | 35   | 24.5 | 13   | 40   | 18   | 29   | 9    | 22   | 19   |
| 7587 | 48   | 30   | 15   | 40   | 21   | 34   | 11   | 26   | 33.5 |
| 7588 | 67   | 47   | 22   | 54   | 29   | 54.5 | 16   | 55   | 43   |
| 7589 | 84   | 59   | 36   | 69.5 | 41   | 65   | 21   | 53   | 60   |
| 7590 | 53   | 32   | 23   | 57   | 24   | 34.5 | 18   | 41   | 24   |
| 7591 | 75   | 57   | 31   | 70   | 33   | 64   | 22   | 54   | 80   |
| 7592 | 93.5 | 77   | 32.5 | 72.5 | 35   | 92   | 25   | 80   | 92   |
| 7593 | 89   | 78   | 30   | 63.5 | 32   | 78   | 29   | 59   | 89   |
| 7594 | 75   | 51   | 23   | 62   | 30   | 64   | 18   | 57   | 73   |
| 7595 | 66   | 42   | 33   | 66   | 28   | 50   | 24   | 40.5 | 73   |
| 7596 | 79   | 51.5 | 20   | 58   | 31   | 57   | 20   | 67   | 50.5 |
| 7597 | 54.5 | 42   | 19   | 45   | 27   | 48   | 19   | 44.5 | 41.5 |
| 7598 | 66   | 50   | 27   | 64   | 34   | 53.5 | 21   | 48   | 51   |
| 7599 | 68   | 44.5 | 24   | 67   | 34   | 50   | 19.5 | 47   | 48   |
| 7600 | 46   | 29   | 13   | 54.5 | 19   | 37   | 12   | 29   | 32   |
| 7601 | 69   | 46   | 18   | 55   | 31   | 50   | 22   | 39.5 | 67   |
| 7602 | 47   | 30   | 18   | 42   | 24   | 40   | 15   | 31   | 30   |
| 7603 | 86   | 40   | 18   | 67   | 34   | 47   | 14   | 41   | 67   |
| 7604 | 51   | 35   | 17   | 44   | 22   | 40   | 11   | 39   | 35   |
| 7605 | 93   | 60   | 27   | 62   | 30   | 65   | 67   | 53   | 61   |
| 7606 | 60.5 | 42   | 15   | 50   | 28   | 44   | 15   | 38   | 31   |
| 7607 | 35   | 21   | 8    | 36   | 24   | 24.5 | 11   | 20   | 22   |
| 7608 | 50   | 37   | 15   | 43   | 23   | 39.5 | 14   | 40.5 | 29   |
| 7609 | 48   | 29   | 18   | 130  | 21.5 | 34   | 12   | 40.5 | 41   |
| 7610 | 64   | 29   | 13   | 42.5 | 22   | 34   | 11   | 30.5 | 18   |
| 7611 | 46   | 22   | 11   | 46   | 19.5 | 32   | 9    | 24   | 28   |
| 7612 | 49.5 | 26   | 12   | 44   | 17   | 33   | 8    | 24   | 23   |

|      |      |      |      |       |      |      |      |      |      |
|------|------|------|------|-------|------|------|------|------|------|
| 7613 | 60   | 48   | 33   | 100   | 32   | 57   | 21   | 40   | 53.5 |
| 7614 | 77   | 56   | 25   | 87    | 30   | 82   | 15   | 33   | 59   |
| 7615 | 75.5 | 52   | 21   | 88    | 34.5 | 67   | 15   | 30   | 73.5 |
| 7616 | 50.5 | 77   | 41   | 105   | 44.5 | 63   | 28   | 63   | 94   |
| 7617 | 60   | 63   | 35   | 120.5 | 39   | 54   | 24   | 50   | 70   |
| 7618 | 60.5 | 68   | 32   | 90    | 55.5 | 67   | 24   | 50   | 101  |
| 7619 | 41   | 56.5 | 27   | 79    | 42   | 50   | 20.5 | 41   | 72   |
| 7620 | 216  | 27   | 18.5 | 66    | 29.5 | 51   | 24   | 22   | 76   |
| 7621 | 35   | 45   | 28   | 73.5  | 46   | 46   | 17   | 33   | 59   |
| 7622 | 78.5 | 97   | 46   | 154   | 54   | 77   | 36   | 76.5 | 79   |
| 7623 | 65   | 55.5 | 26   | 114.5 | 34.5 | 62   | 21   | 45   | 49   |
| 7624 | 39.5 | 49   | 26   | 85    | 35   | 49   | 18   | 65   | 52   |
| 7625 | 40.5 | 42   | 22   | 73    | 33   | 51   | 15   | 33   | 44.5 |
| 7626 | 111  | 71   | 36   | 104   | 39   | 86   | 28   | 52   | 70   |
| 7627 | 41   | 56   | 28   | 93.5  | 30.5 | 50   | 19   | 36   | 69   |
| 7628 | 47   | 26   | 17   | 87    | 35.5 | 35   | 12   | 24.5 | 38   |
| 7629 | 32.5 | 43   | 21   | 71.5  | 40   | 42   | 14   | 30   | 41   |
| 7630 | 77   | 46   | 24   | 88.5  | 25.5 | 46   | 23   | 38   | 56   |
| 7631 | 40   | 53.5 | 24.5 | 76    | 26   | 54.5 | 18   | 34   | 51   |
| 7632 | 57   | 58   | 22   | 88    | 27.5 | 53   | 20   | 39   | 67   |
| 7633 | 62   | 53   | 41.5 | 85.5  | 35.5 | 48   | 23   | 40   | 53   |
| 7634 | 48   | 37.5 | 18   | 65    | 25   | 54.5 | 13   | 26   | 45   |
| 7635 | 35.5 | 46   | 26   | 86.5  | 26   | 47   | 18   | 39   | 52   |
| 7636 | 34   | 24   | 13   | 65    | 25.5 | 32.5 | 10   | 16   | 26   |
| 7637 | 71.5 | 54.5 | 39   | 99    | 50.5 | 52   | 23   | 50.5 | 62   |
| 7638 | 56   | 56   | 25   | 81.5  | 28   | 68   | 18   | 37   | 51   |
| 7639 | 49   | 51   | 52   | 98.5  | 33   | 54.5 | 22   | 39   | 51   |
| 7640 | 37   | 34   | 21   | 72    | 27   | 41   | 12   | 25   | 30   |
| 7641 | 36.5 | 41   | 22   | 75    | 24   | 43   | 15   | 37   | 43   |
| 7642 | 47   | 75   | 32   | 106   | 45   | 59   | 27   | 59   | 74   |
| 7643 | 15   | 18   | 4    | 11    | 8    | 23   | 3    | 7    | 9    |
| 7644 | 13   | 18   | 5    | 12    | 7    | 22.5 | 5    | 8    | 9    |
| 7645 | 29.5 | 26   | 19   | 56    | 24   | 35   | 15   | 52   | 15   |
| 7646 | 25   | 21   | 7    | 44    | 17.5 | 31   | 5    | 11   | 13   |
| 7647 | 24   | 22   | 69   | 40.5  | 16   | 27   | 6    | 12   | 13   |
| 7648 | 58   | 26   | 22   | 50    | 29   | 41.5 | 15   | 20   | 26   |
| 7649 | 42.5 | 31   | 22   | 60.5  | 35.5 | 37   | 24   | 29   | 134  |
| 7650 | 34   | 21   | 22   | 106   | 25   | 31   | 36   | 34.5 | 33   |
| 7651 | 20.5 | 16   | 14.5 | 65    | 27   | 26   | 10   | 17   | 16   |
| 7652 | 34   | 20   | 19   | 76    | 61.5 | 34   | 17   | 19   | 23   |
| 7653 | 82.5 | 21.5 | 12   | 45    | 31.5 | 34   | 9    | 18   | 20   |
| 7654 | 52   | 27   | 28   | 127   | 24   | 44   | 11   | 33   | 20.5 |
| 7655 | 67   | 72   | 30   | 95.5  | 48   | 84   | 23   | 48   | 79.5 |
| 7656 | 100  | 42   | 20   | 68    | 26   | 63   | 16   | 29   | 34   |
| 7657 | 87   | 90.5 | 44   | 105   | 45.5 | 91   | 35   | 72   | 86   |
| 7658 | 57   | 49   | 26   | 154   | 33.5 | 63   | 15   | 36   | 59   |
| 7659 | 80   | 69   | 34   | 100   | 42   | 97   | 25   | 47   | 69   |

|      |       |      |      |       |      |       |      |      |      |
|------|-------|------|------|-------|------|-------|------|------|------|
| 7660 | 64    | 42   | 24.5 | 64    | 40.5 | 62    | 16   | 39   | 34   |
| 7661 | 81.5  | 43   | 22   | 75    | 29   | 90    | 13   | 31   | 78   |
| 7662 | 63    | 55.5 | 27   | 75    | 48   | 68.5  | 20   | 32   | 50   |
| 7663 | 265   | 50   | 30   | 102   | 34   | 88    | 17   | 34   | 50   |
| 7664 | 53    | 38   | 22.5 | 90    | 27   | 58    | 13   | 25   | 45   |
| 7665 | 203.5 | 51   | 37   | 99    | 64   | 75.5  | 34   | 81   | 74   |
| 7666 | 53    | 41   | 27   | 89    | 28   | 62    | 14   | 29   | 33   |
| 7667 | 41    | 32.5 | 22   | 78    | 22   | 54.5  | 11   | 21   | 34   |
| 7668 | 46    | 37   | 16   | 58    | 26   | 59.5  | 10   | 18   | 35   |
| 7669 | 63.5  | 63   | 30   | 77    | 37   | 76    | 21   | 41   | 66   |
| 7670 | 113   | 45   | 20   | 73    | 28   | 59.5  | 15   | 27   | 57   |
| 7671 | 61    | 40   | 26   | 69.5  | 37   | 58.5  | 16   | 24   | 53   |
| 7672 | 74    | 47   | 27   | 88    | 115  | 75    | 16   | 30   | 42   |
| 7673 | 51.5  | 40   | 23   | 83    | 26   | 56.5  | 15   | 25   | 52   |
| 7674 | 72    | 95   | 41   | 94    | 40.5 | 79    | 28   | 58   | 143  |
| 7675 | 69    | 75   | 43   | 115   | 50.5 | 78    | 33.5 | 58.5 | 78   |
| 7676 | 73.5  | 70   | 45.5 | 104.5 | 43   | 72    | 30   | 56.5 | 85   |
| 7677 | 63    | 60   | 32   | 106   | 40   | 64    | 25   | 56   | 104  |
| 7678 | 57.5  | 46   | 26   | 71    | 30   | 67    | 16   | 34   | 49   |
| 7679 | 100.5 | 51   | 27   | 101   | 35   | 100.5 | 16   | 47   | 56   |
| 7680 | 61    | 34   | 25   | 71    | 39   | 55    | 16   | 28   | 35   |
| 7681 | 307   | 37   | 23.5 | 80    | 40   | 101   | 11   | 26   | 47   |
| 7682 | 63.5  | 34   | 22.5 | 85    | 32   | 58    | 11   | 31   | 34   |
| 7683 | 95    | 56   | 33   | 88    | 41   | 77    | 17   | 36   | 78   |
| 7684 | 76    | 35.5 | 23   | 72    | 33   | 54    | 13   | 29   | 51   |
| 7685 | 57    | 55   | 28.5 | 100   | 30   | 68    | 17   | 39   | 103  |
| 7686 | 70    | 33   | 22   | 115.5 | 29   | 52    | 11   | 27   | 51   |
| 7687 | 52.5  | 31   | 22   | 92    | 31   | 51.5  | 14.5 | 17.5 | 44   |
| 7688 | 50    | 55   | 30   | 81    | 30   | 61    | 18   | 44.5 | 56   |
| 7689 | 60    | 42   | 21   | 88    | 28   | 57.5  | 14   | 32.5 | 56.5 |
| 7690 | 51    | 49.5 | 30   | 69    | 30   | 55    | 18   | 39   | 47   |
| 7691 | 31    | 28   | 7    | 13    | 10   | 47    | 6    | 9    | 15   |
| 7692 | 7     | 9    | 3    | 7     | 5    | 11    | 3    | 5    | 4    |
| 7693 | 42.5  | 42   | 12   | 35    | 28   | 47    | 20   | 16   | 21   |
| 7694 | 36    | 29   | 12   | 66    | 21   | 45    | 8    | 29   | 21   |
| 7695 | 46.5  | 26   | 15.5 | 64    | 30.5 | 45    | 45   | 20   | 35   |
| 7696 | 41.5  | 45   | 17   | 50.5  | 27   | 51    | 20.5 | 16   | 24.5 |
| 7697 | 359   | 46   | 36   | 150   | 42.5 | 115   | 21   | 40   | 92.5 |
| 7698 | 45    | 32   | 15   | 54.5  | 48   | 53    | 18   | 19   | 35   |
| 7699 | 95    | 28   | 18   | 25    | 39   | 45    | 11   | 66   | 28   |
| 7700 | 255   | 36   | 19   | 93    | 32   | 54    | 13   | 82   | 77   |
| 7701 | 50    | 41   | 16   | 34    | 37.5 | 52    | 11   | 25   | 30   |
| 7702 | 43.5  | 28   | 14   | 47    | 21   | 49    | 10   | 15   | 22   |
| 7703 | 39    | 27   | 15   | 63    | 23.5 | 46    | 10   | 20   | 29   |
| 7704 | 54    | 27   | 13   | 46    | 26   | 44.5  | 7    | 18   | 18   |
| 7705 | 37.5  | 30   | 30   | 56    | 30   | 40.5  | 12   | 21   | 32   |
| 7706 | 39.5  | 31   | 21   | 50    | 35.5 | 44    | 21.5 | 28   | 22   |

|      |      |      |      |       |       |      |      |      |      |
|------|------|------|------|-------|-------|------|------|------|------|
| 7707 | 40.5 | 30.5 | 13   | 43    | 27    | 51   | 8    | 14   | 30   |
| 7708 | 62.5 | 31   | 24.5 | 109.5 | 46    | 51   | 19   | 31   | 29   |
| 7709 | 39   | 27   | 12   | 30    | 96    | 44   | 11   | 16   | 23   |
| 7710 | 41   | 28.5 | 16.5 | 38    | 24.5  | 50   | 55   | 15   | 28   |
| 7711 | 167  | 32   | 15   | 35    | 36    | 50   | 12   | 19   | 27   |
| 7712 | 74   | 31   | 16   | 44    | 26    | 49   | 11   | 25   | 25   |
| 7713 | 83   | 62   | 43   | 106.5 | 60    | 79   | 45   | 60   | 58   |
| 7714 | 44   | 32   | 17   | 63    | 84.5  | 48.5 | 12   | 52   | 99   |
| 7715 | 44.5 | 26.5 | 40.5 | 96.5  | 27    | 47   | 12   | 21   | 22   |
| 7716 | 43   | 25   | 22   | 78.5  | 94.5  | 44   | 9    | 20   | 27   |
| 7717 | 42   | 32   | 15   | 51    | 50    | 48   | 18   | 15   | 22.5 |
| 7718 | 38   | 28.5 | 18   | 75    | 37    | 47   | 9    | 32   | 59   |
| 7719 | 39   | 28   | 25   | 48    | 22    | 44   | 12   | 16   | 31   |
| 7720 | 332  | 31   | 17   | 85    | 26    | 87   | 11   | 22   | 46   |
| 7721 | 53   | 30   | 16   | 72    | 27    | 45   | 66   | 44.5 | 23.5 |
| 7722 | 69   | 35   | 14   | 24    | 28    | 55   | 9    | 14   | 80   |
| 7723 | 34.5 | 28   | 9    | 18    | 18    | 42   | 11   | 13   | 16   |
| 7724 | 59.5 | 39   | 36   | 99    | 45    | 59   | 22   | 40   | 40   |
| 7725 | 60   | 34   | 16   | 30    | 43    | 50   | 12.5 | 15   | 29.5 |
| 7726 | 58   | 39   | 21.5 | 215.5 | 26    | 55.5 | 20.5 | 34   | 59   |
| 7727 | 49   | 34   | 40   | 38    | 40.5  | 58   | 18   | 20   | 33   |
| 7728 | 46   | 26   | 16   | 31    | 36    | 46   | 21   | 18.5 | 27   |
| 7729 | 49   | 29.5 | 15   | 52    | 34.5  | 43   | 10   | 17.5 | 81   |
| 7730 | 49   | 25.5 | 14   | 46.5  | 43.5  | 52   | 12.5 | 18   | 24   |
| 7731 | 36.5 | 32   | 15   | 78    | 20    | 44   | 9    | 19   | 89   |
| 7732 | 55.5 | 40.5 | 15   | 58    | 19.5  | 66   | 9    | 16   | 84   |
| 7733 | 35   | 26   | 16   | 76    | 19    | 46   | 11   | 15   | 58   |
| 7734 | 37.5 | 31   | 15   | 52.5  | 20    | 45   | 10   | 17   | 44   |
| 7735 | 43   | 32   | 19   | 76.5  | 20    | 47   | 10   | 20   | 153  |
| 7736 | 41   | 27   | 15   | 70    | 22    | 41.5 | 10   | 18   | 70   |
| 7737 | 44.5 | 32   | 24   | 71    | 27    | 52   | 21   | 17   | 50   |
| 7738 | 60   | 25   | 13   | 30    | 25    | 37   | 19.5 | 66   | 16   |
| 7739 | 48.5 | 32   | 19.5 | 98    | 23    | 51.5 | 13   | 32   | 79.5 |
| 7740 | 50   | 28   | 16   | 80    | 104.5 | 46   | 14   | 26.5 | 21   |
| 7741 | 41.5 | 28   | 14   | 77.5  | 24    | 48.5 | 10   | 67.5 | 46   |
| 7742 | 53   | 31   | 25   | 68    | 52    | 45   | 12   | 68   | 44   |
| 7743 | 57   | 29   | 17   | 41    | 51    | 45   | 13.5 | 21   | 24.5 |
| 7744 | 45   | 32.5 | 21   | 64.5  | 29    | 46   | 11   | 21   | 53   |
| 7745 | 44   | 42   | 22   | 71    | 29    | 48   | 21   | 34   | 53   |
| 7746 | 151  | 66   | 35.5 | 88    | 41    | 65   | 29   | 57   | 75   |
| 7747 | 74.5 | 55   | 28   | 80    | 37    | 58   | 21   | 43   | 58   |
| 7748 | 40   | 28   | 19   | 66.5  | 23    | 46   | 12   | 20   | 104  |
| 7749 | 103  | 94.5 | 32   | 122   | 36.5  | 91   | 25   | 64.5 | 78   |
| 7750 | 52.5 | 41   | 24   | 68    | 23    | 50   | 16   | 33   | 36   |
| 7751 | 55.5 | 33   | 21   | 63    | 24    | 50   | 14.5 | 33   | 56   |
| 7752 | 40   | 25   | 23   | 54    | 20    | 43   | 10   | 20   | 23   |
| 7753 | 36   | 24   | 15   | 76    | 21    | 40.5 | 9    | 23   | 47   |

|      |       |      |      |       |      |      |      |      |      |
|------|-------|------|------|-------|------|------|------|------|------|
| 7754 | 48    | 47   | 30   | 79    | 33   | 47   | 19.5 | 39   | 111  |
| 7755 | 51    | 57   | 29   | 89    | 32   | 58   | 23   | 46   | 70   |
| 7756 | 50    | 47   | 25   | 77    | 30   | 57.5 | 21   | 40   | 56.5 |
| 7757 | 55    | 45.5 | 25   | 77    | 29   | 59   | 16.5 | 33   | 69   |
| 7758 | 62    | 59   | 29   | 84    | 34   | 61   | 29   | 48   | 60   |
| 7759 | 47    | 51   | 27   | 71    | 24   | 58   | 19   | 40   | 52   |
| 7760 | 53.5  | 62   | 29   | 74.5  | 37.5 | 57   | 24   | 49   | 70   |
| 7761 | 43    | 23   | 15   | 61.5  | 22   | 42   | 7    | 20   | 48   |
| 7762 | 46    | 38   | 18   | 58    | 22   | 49.5 | 13   | 29   | 36.5 |
| 7763 | 38    | 25.5 | 15.5 | 58    | 20   | 40.5 | 10   | 20   | 24   |
| 7764 | 113.5 | 34.5 | 20   | 70.5  | 34   | 62   | 13   | 23.5 | 42   |
| 7765 | 46    | 29   | 16   | 61    | 25   | 47   | 9.5  | 18   | 26   |
| 7766 | 49    | 43   | 24   | 88    | 95   | 54   | 15   | 35   | 50   |
| 7767 | 44    | 34   | 22   | 57    | 48   | 44   | 15   | 28.5 | 44   |
| 7768 | 39    | 23   | 16   | 61.5  | 21   | 40   | 7    | 20   | 22   |
| 7769 | 50.5  | 44   | 26   | 133.5 | 38   | 53   | 18   | 40   | 64   |
| 7770 | 38.5  | 25   | 13   | 46    | 23   | 40   | 9    | 18   | 23   |
| 7771 | 72    | 32   | 30   | 63    | 42   | 74   | 11   | 25   | 55   |
| 7772 | 47.5  | 25   | 16   | 52    | 22.5 | 40   | 8    | 20.5 | 30   |
| 7773 | 42    | 55.5 | 27   | 58.5  | 28   | 53   | 20   | 44   | 50   |
| 7774 | 68    | 62   | 32   | 129   | 36.5 | 64   | 25   | 49   | 65   |
| 7775 | 57    | 93   | 45.5 | 89    | 67   | 73   | 33   | 68.5 | 94   |
| 7776 | 38    | 24   | 16   | 119   | 20   | 42   | 9    | 21   | 29   |
| 7777 | 36    | 36.5 | 21   | 62    | 28   | 41   | 15   | 35   | 33   |
| 7778 | 148   | 26   | 18   | 52    | 21   | 42   | 12   | 24   | 21   |
| 7779 | 49    | 46   | 26   | 83    | 31   | 52   | 18   | 40   | 40   |
| 7780 | 55    | 48   | 29   | 75.5  | 33   | 55.5 | 19   | 41.5 | 47   |
| 7781 | 72    | 88.5 | 48   | 122   | 41   | 72.5 | 36   | 77   | 93.5 |
| 7782 | 115   | 37   | 19   | 66    | 29   | 49   | 15   | 34   | 58   |
| 7783 | 55    | 44   | 21   | 76    | 29   | 58   | 14   | 33   | 86   |
| 7784 | 42    | 40   | 15   | 47    | 22   | 54   | 12   | 25   | 63   |
| 7785 | 41    | 32   | 17.5 | 75    | 22   | 38   | 11   | 31   | 37   |
| 7786 | 56    | 57   | 40   | 84    | 29.5 | 57.5 | 24   | 49   | 70   |
| 7787 | 57.5  | 27.5 | 29.5 | 114   | 26   | 43   | 23   | 36   | 22   |
| 7788 | 45    | 26   | 22   | 90    | 34   | 42   | 18   | 26   | 50   |
| 7789 | 63    | 26   | 18   | 42    | 25   | 48.5 | 10   | 23   | 26   |
| 7790 | 41.5  | 28   | 17   | 26    | 24   | 44.5 | 10   | 16   | 24   |
| 7791 | 37.5  | 22   | 9    | 25    | 16   | 36   | 7    | 10   | 16   |
| 7792 | 31    | 22   | 11   | 23    | 20   | 39   | 7    | 12   | 14   |
| 7793 | 42    | 26   | 19   | 68    | 24   | 42.5 | 16   | 27   | 31   |
| 7794 | 31.5  | 22.5 | 13   | 30    | 26.5 | 42.5 | 8    | 14.5 | 13.5 |
| 7795 | 31    | 21   | 9    | 28.5  | 17.5 | 35   | 8    | 14   | 14   |
| 7796 | 40.5  | 25   | 17   | 52.5  | 25   | 42.5 | 10   | 20   | 23   |
| 7797 | 42    | 27.5 | 16   | 33    | 22   | 41   | 11   | 162  | 24   |
| 7798 | 50    | 37.5 | 25   | 41    | 31.5 | 60.5 | 15   | 110  | 24   |
| 7799 | 44    | 31   | 14   | 61.5  | 23   | 51   | 9    | 52   | 20   |
| 7800 | 47    | 43   | 22.5 | 88    | 42   | 53.5 | 19   | 36   | 164  |



|      |       |      |      |       |      |      |      |      |      |
|------|-------|------|------|-------|------|------|------|------|------|
| 7801 | 36    | 31.5 | 13   | 32    | 29   | 44.5 | 8    | 20   | 22   |
| 7802 | 83.5  | 32   | 25   | 83    | 34   | 48   | 21   | 39   | 270  |
| 7803 | 34    | 29   | 22   | 73    | 37.5 | 42   | 13   | 22   | 57   |
| 7804 | 30    | 27   | 10   | 28.5  | 26   | 42   | 8    | 13   | 21   |
| 7805 | 35    | 29   | 51   | 83    | 23   | 46   | 14   | 20   | 19   |
| 7806 | 28.5  | 25   | 13   | 57    | 20   | 34   | 10   | 14   | 49   |
| 7807 | 32.5  | 27   | 11   | 42.5  | 27   | 40   | 9    | 12   | 21   |
| 7808 | 31    | 30   | 12   | 28    | 25   | 40   | 11   | 11   | 18   |
| 7809 | 48    | 34   | 29   | 150.5 | 29   | 46   | 17   | 40   | 43   |
| 7810 | 58.5  | 31   | 29   | 33    | 28   | 46.5 | 10   | 17   | 21   |
| 7811 | 30    | 25.5 | 9    | 29    | 26   | 33   | 6    | 12   | 19   |
| 7812 | 60    | 33   | 15   | 71.5  | 20   | 62.5 | 10   | 18   | 25   |
| 7813 | 41    | 43.5 | 21   | 69.5  | 25   | 45   | 14   | 34   | 31   |
| 7814 | 39    | 35   | 19   | 70.5  | 19   | 43   | 12.5 | 24   | 31   |
| 7815 | 32    | 38   | 16   | 55    | 23   | 44   | 13   | 25   | 30   |
| 7816 | 51    | 61   | 30   | 81    | 32   | 59   | 24   | 40   | 86   |
| 7817 | 40.5  | 60   | 29   | 73    | 37   | 56   | 23   | 51   | 94   |
| 7818 | 169   | 77   | 38.5 | 69    | 34.5 | 75   | 30   | 60   | 79   |
| 7819 | 53    | 54   | 27   | 72    | 25   | 72   | 17.5 | 45   | 46   |
| 7820 | 38    | 35   | 21   | 55    | 24   | 42   | 15   | 25   | 29   |
| 7821 | 40    | 54   | 28   | 76    | 31.5 | 49   | 19.5 | 38   | 138  |
| 7822 | 45    | 54.5 | 29   | 89    | 26.5 | 51   | 22   | 40   | 44   |
| 7823 | 40    | 64   | 32.5 | 70.5  | 26   | 55   | 21   | 47   | 68   |
| 7824 | 47.5  | 66   | 30   | 87    | 30   | 51   | 23   | 46   | 58   |
| 7825 | 35    | 34   | 18   | 59    | 20   | 38.5 | 11   | 22   | 29   |
| 7826 | 41    | 57   | 29   | 63    | 32   | 51   | 24   | 37   | 50.5 |
| 7827 | 38.5  | 54   | 25   | 73    | 31   | 55   | 18   | 39   | 75   |
| 7828 | 47    | 71   | 31   | 83    | 34   | 60.5 | 26   | 58   | 73   |
| 7829 | 50    | 66   | 35   | 90    | 39   | 59   | 27   | 55   | 69   |
| 7830 | 50.5  | 48   | 21   | 60    | 23   | 59   | 15   | 35   | 39.5 |
| 7831 | 45    | 52   | 29   | 69    | 37   | 53.5 | 20   | 40   | 49   |
| 7832 | 47    | 47   | 24   | 71    | 27   | 55.5 | 20   | 37   | 44   |
| 7833 | 69    | 77   | 32.5 | 85    | 32   | 78   | 25   | 50   | 60   |
| 7834 | 396.5 | 65   | 35   | 97.5  | 39   | 100  | 23   | 54   | 76   |
| 7835 | 1164  | 75   | 32   | 82    | 34   | 367  | 20   | 45   | 91   |
| 7836 | 31    | 35   | 21   | 64    | 23   | 40   | 14   | 27   | 36   |
| 7837 | 56.5  | 86.5 | 44   | 117   | 40   | 66.5 | 35   | 68.5 | 98   |
| 7838 | 41    | 41   | 22   | 72    | 28.5 | 54   | 15   | 30   | 54.5 |
| 7839 | 39    | 48.5 | 23   | 62    | 27   | 47   | 17   | 36   | 44   |
| 7840 | 42    | 62   | 32   | 89    | 30   | 54   | 41   | 63   | 66   |
| 7841 | 44    | 64   | 32   | 105   | 33   | 58.5 | 25   | 49.5 | 74   |
| 7842 | 55    | 72   | 31   | 90    | 37   | 73   | 24   | 49   | 71   |
| 7843 | 42    | 65   | 29   | 83    | 29.5 | 49   | 21   | 40   | 65   |
| 7844 | 55    | 93   | 50   | 100   | 48   | 73   | 42   | 73   | 97   |
| 7845 | 59    | 96   | 49   | 113   | 41.5 | 72   | 39   | 75   | 86   |
| 7846 | 32    | 47   | 23.5 | 71    | 25   | 41   | 16   | 36   | 61   |
| 7847 | 38    | 47.5 | 26   | 73    | 32   | 46   | 23   | 38.5 | 43   |

|      |       |      |      |       |      |      |      |      |       |
|------|-------|------|------|-------|------|------|------|------|-------|
| 7848 | 25    | 20   | 15   | 54    | 18.5 | 32   | 14   | 19   | 17    |
| 7849 | 29    | 23   | 11   | 37    | 17   | 33   | 7    | 14   | 27    |
| 7850 | 24    | 24   | 14   | 87    | 23   | 34.5 | 7    | 23   | 16    |
| 7851 | 24    | 21   | 14   | 56    | 21   | 31   | 7    | 15   | 26    |
| 7852 | 24    | 20   | 10   | 46.5  | 14   | 32   | 10   | 17   | 18.5  |
| 7853 | 42    | 25   | 17   | 115   | 23   | 32   | 13   | 77   | 17    |
| 7854 | 71    | 19   | 11   | 26    | 24   | 28   | 8    | 13   | 17    |
| 7855 | 28    | 23   | 11   | 27    | 20.5 | 43   | 9    | 16   | 32.5  |
| 7856 | 34    | 25   | 18   | 69    | 26   | 39   | 11.5 | 24   | 57.5  |
| 7857 | 69    | 32   | 34   | 76    | 41   | 40   | 22   | 45.5 | 53    |
| 7858 | 46.5  | 34   | 25   | 90    | 42   | 41   | 13.5 | 44   | 69    |
| 7859 | 45.5  | 23   | 21   | 81    | 27   | 34   | 18   | 36   | 77    |
| 7860 | 389.5 | 93.5 | 25   | 104.5 | 33   | 351  | 35   | 48   | 137.5 |
| 7861 | 23    | 22   | 12   | 39    | 22   | 31   | 8    | 16   | 31    |
| 7862 | 37    | 26   | 21   | 68    | 38   | 34   | 11   | 27   | 33    |
| 7863 | 32    | 24   | 16   | 70    | 23   | 35.5 | 50   | 19   | 31    |
| 7864 | 36    | 21   | 16   | 66    | 83.5 | 39.5 | 11   | 25   | 24    |
| 7865 | 25.5  | 20   | 17   | 61    | 20   | 32   | 9    | 20   | 37    |
| 7866 | 179.5 | 52   | 45.5 | 126   | 42   | 62   | 32   | 129  | 69.5  |
| 7867 | 25    | 22   | 17   | 58    | 17   | 29.5 | 9    | 19   | 33    |
| 7868 | 26    | 19.5 | 14   | 55    | 17   | 33   | 6    | 14   | 15    |
| 7869 | 24.5  | 19   | 12   | 65    | 24   | 30   | 7.5  | 14.5 | 25    |
| 7870 | 35.5  | 28   | 20   | 83    | 23   | 37   | 10   | 25   | 27    |
| 7871 | 29    | 22   | 14   | 73    | 31   | 35   | 12   | 23   | 28    |
| 7872 | 22    | 18.5 | 18   | 63    | 18.5 | 30   | 7    | 16   | 25    |
| 7873 | 31    | 23   | 15   | 88    | 17   | 31   | 8    | 22   | 18    |
| 7874 | 225   | 22   | 14   | 64.5  | 18   | 65   | 7    | 17   | 34    |
| 7875 | 27    | 21   | 11   | 56    | 16   | 34   | 7.5  | 16   | 29.5  |
| 7876 | 34.5  | 27   | 17   | 60    | 23.5 | 38   | 10   | 25.5 | 30    |
| 7877 | 25    | 25.5 | 14   | 53    | 45   | 29   | 12   | 16   | 16    |
| 7878 | 25    | 20   | 15   | 71    | 17   | 30   | 7.5  | 16   | 18    |
| 7879 | 40    | 18   | 16   | 59.5  | 17   | 35   | 7    | 24   | 24.5  |
| 7880 | 26.5  | 20   | 20   | 67    | 21   | 34   | 9    | 19   | 32    |
| 7881 | 25    | 18   | 13   | 62    | 22   | 26.5 | 7.5  | 15   | 16    |
| 7882 | 34    | 21   | 14   | 49    | 26   | 34   | 9    | 19   | 18.5  |
| 7883 | 17    | 10   | 9    | 27    | 18   | 12   | 5    | 11   | 12    |
| 7884 | 17    | 10   | 5    | 13    | 15   | 15   | 6    | 8    | 8     |
| 7885 | 15.5  | 10   | 5    | 9     | 14   | 13   | 6    | 8    | 6     |
| 7886 | 33    | 29   | 12   | 32    | 26   | 35.5 | 6.5  | 12   | 15    |
| 7887 | 77.5  | 9    | 6    | 18    | 15   | 21   | 5    | 10   | 9     |
| 7888 | 56    | 74   | 42   | 89    | 32.5 | 73   | 25   | 65   | 72.5  |
| 7889 | 77    | 100  | 38   | 119   | 36   | 84   | 37   | 73   | 70    |
| 7890 | 62    | 74   | 36   | 121   | 38   | 63   | 27.5 | 54   | 64    |
| 7891 | 49    | 36   | 22   | 102   | 23   | 49   | 12   | 26   | 44    |
| 7892 | 54    | 52   | 27   | 94    | 26   | 53   | 17   | 39   | 73    |
| 7893 | 60    | 35   | 26   | 91    | 27.5 | 50.5 | 15   | 27.5 | 52    |
| 7894 | 156.5 | 59   | 28   | 72    | 31   | 68   | 22   | 46   | 56    |

|      |      |      |      |       |       |       |      |      |      |
|------|------|------|------|-------|-------|-------|------|------|------|
| 7895 | 79.5 | 54   | 25   | 96    | 35    | 66    | 19   | 39   | 60   |
| 7896 | 58   | 71   | 32   | 99    | 30    | 68    | 26   | 54   | 85   |
| 7897 | 76   | 37.5 | 22   | 117.5 | 27    | 55.5  | 12   | 28   | 30   |
| 7898 | 45   | 44.5 | 28   | 101   | 25.5  | 50    | 17   | 43   | 45   |
| 7899 | 53   | 53   | 29.5 | 128   | 42.5  | 56    | 33   | 43   | 67.5 |
| 7900 | 46   | 34   | 16   | 69.5  | 28    | 44    | 11.5 | 20   | 26   |
| 7901 | 179  | 67   | 32   | 102   | 30    | 74    | 23   | 53   | 128  |
| 7902 | 48   | 52   | 32.5 | 110   | 100.5 | 59.5  | 20   | 64   | 104  |
| 7903 | 72   | 71   | 32   | 102   | 35    | 77.5  | 93.5 | 54   | 74   |
| 7904 | 65   | 63   | 30   | 104   | 34    | 62    | 23   | 48   | 75   |
| 7905 | 42.5 | 37   | 19.5 | 79    | 27    | 45    | 14   | 24   | 33   |
| 7906 | 45   | 38   | 24   | 95    | 156   | 47    | 15   | 35   | 60.5 |
| 7907 | 81.5 | 61   | 18.5 | 77    | 28.5  | 100.5 | 12   | 29   | 58   |
| 7908 | 60   | 61   | 33   | 112.5 | 37    | 69    | 26   | 51.5 | 71   |
| 7909 | 68   | 74   | 42   | 122.5 | 42.5  | 69    | 33.5 | 66   | 70   |
| 7910 | 53   | 66   | 33   | 92.5  | 37    | 66    | 25   | 50   | 64   |
| 7911 | 78   | 47   | 29   | 94    | 36    | 69    | 19.5 | 53.5 | 54   |
| 7912 | 64.5 | 90   | 46   | 118   | 41    | 70    | 45   | 70   | 92   |
| 7913 | 73   | 130  | 39   | 120   | 44    | 84    | 32   | 59   | 229  |
| 7914 | 52.5 | 61   | 26   | 84    | 40    | 59    | 21   | 41   | 52.5 |
| 7915 | 90   | 95   | 52   | 133   | 51    | 96    | 37   | 73   | 97   |
| 7916 | 47   | 51   | 28   | 101   | 33    | 54.5  | 20   | 40   | 50   |
| 7917 | 68   | 72   | 35.5 | 117   | 33.5  | 70    | 25.5 | 60   | 73   |
| 7918 | 42   | 44   | 26   | 98.5  | 23    | 46    | 17   | 38   | 70   |
| 7919 | 46.5 | 44   | 25   | 96.5  | 27    | 50.5  | 17   | 50   | 60   |
| 7920 | 41   | 33   | 25   | 75.5  | 29.5  | 45.5  | 14   | 30   | 38.5 |
| 7921 | 47   | 44   | 23   | 98    | 21    | 53.5  | 14   | 37   | 35   |
| 7922 | 34   | 26   | 10.5 | 62    | 15    | 40.5  | 8    | 13   | 18   |
| 7923 | 29   | 24   | 22   | 83    | 16    | 37    | 7.5  | 13   | 20   |
| 7924 | 31   | 28   | 9    | 29    | 16    | 39.5  | 8    | 15   | 20   |
| 7925 | 35   | 28   | 14   | 34    | 23    | 40.5  | 10   | 14   | 19   |
| 7926 | 37   | 30   | 14   | 46    | 23    | 43    | 12   | 22   | 24   |
| 7927 | 29   | 24   | 11   | 39.5  | 20    | 41    | 7    | 12   | 24   |
| 7928 | 89   | 26   | 17   | 72.5  | 31    | 47    | 13   | 21   | 22   |
| 7929 | 46   | 27   | 11   | 33.5  | 19.5  | 39    | 9    | 18   | 21   |
| 7930 | 33   | 24   | 8    | 47    | 17    | 39    | 7    | 13   | 16   |
| 7931 | 38   | 37   | 15   | 76    | 20    | 43    | 11   | 21   | 49.5 |
| 7932 | 31   | 25   | 10   | 62    | 19    | 39.5  | 5    | 15   | 18   |
| 7933 | 54.5 | 26   | 11   | 43    | 17    | 40    | 9    | 13   | 17   |
| 7934 | 41   | 30   | 27   | 73    | 32    | 49.5  | 21   | 35   | 50   |
| 7935 | 54   | 28   | 59   | 54    | 64    | 44    | 20   | 31   | 33   |
| 7936 | 63.5 | 43   | 29   | 69.5  | 30    | 39    | 13   | 30   | 78.5 |
| 7937 | 68   | 29   | 14   | 80    | 37.5  | 45    | 17   | 44   | 23   |
| 7938 | 37   | 30.5 | 15   | 81.5  | 18    | 43    | 13   | 21   | 68.5 |
| 7939 | 30   | 24   | 13   | 61    | 18    | 37    | 8    | 13   | 14   |
| 7940 | 28.5 | 28   | 11   | 66.5  | 17    | 42    | 8    | 14   | 19   |
| 7941 | 43   | 33   | 18   | 42    | 25    | 50    | 15   | 57.5 | 34   |

|      |       |      |      |       |       |      |      |      |       |
|------|-------|------|------|-------|-------|------|------|------|-------|
| 7942 | 29    | 22   | 10   | 44    | 18    | 33   | 7    | 14   | 14    |
| 7943 | 27    | 23   | 33   | 43    | 16    | 37   | 10   | 18   | 32    |
| 7944 | 50    | 29   | 20   | 108   | 49    | 40   | 17   | 30   | 139.5 |
| 7945 | 45    | 26   | 18   | 72    | 21    | 35   | 11   | 21.5 | 24    |
| 7946 | 35    | 18   | 14   | 55    | 24    | 29   | 29   | 20   | 50    |
| 7947 | 37    | 31   | 11   | 57    | 19    | 43   | 11   | 16   | 19    |
| 7948 | 21    | 23   | 6    | 15    | 9     | 37.5 | 6    | 10   | 13    |
| 7949 | 51    | 20   | 10   | 45    | 23    | 33   | 14   | 14   | 19    |
| 7950 | 36    | 26   | 16   | 60    | 27    | 36   | 13   | 26   | 19.5  |
| 7951 | 41.5  | 37   | 21   | 86    | 41.5  | 53   | 15   | 17   | 27    |
| 7952 | 56    | 28   | 25   | 77    | 25    | 44   | 15   | 25   | 28    |
| 7953 | 42    | 27   | 23   | 131   | 25    | 39   | 27   | 29   | 24    |
| 7954 | 30.5  | 25   | 35   | 61    | 20    | 39   | 8    | 14.5 | 15    |
| 7955 | 38.5  | 24   | 15   | 97    | 15    | 36   | 9    | 16   | 25    |
| 7956 | 46    | 28   | 29   | 132   | 26    | 46   | 16   | 33.5 | 38    |
| 7957 | 30    | 25   | 21   | 61    | 15    | 36   | 7    | 14   | 15    |
| 7958 | 29.5  | 26   | 10   | 41    | 16    | 33   | 9    | 18   | 41    |
| 7959 | 100.5 | 25   | 14   | 46    | 31    | 56   | 12   | 49.5 | 19    |
| 7960 | 36.5  | 24   | 17   | 44    | 21.5  | 36   | 13   | 41   | 18    |
| 7961 | 35    | 22   | 17   | 67    | 50.5  | 37   | 18   | 21   | 28    |
| 7962 | 33.5  | 28   | 23   | 79    | 19    | 40   | 11   | 17   | 34    |
| 7963 | 30    | 23   | 12   | 41    | 17    | 33   | 8    | 15   | 16    |
| 7964 | 31    | 24   | 12   | 41    | 20    | 35.5 | 9    | 16   | 16    |
| 7965 | 28    | 22   | 12   | 41    | 28    | 35   | 7    | 16   | 13    |
| 7966 | 33    | 21   | 12   | 51    | 18    | 34   | 8    | 16   | 18    |
| 7967 | 40.5  | 32   | 17   | 77.5  | 28.5  | 43.5 | 12   | 27   | 33    |
| 7968 | 36    | 29.5 | 22   | 120   | 34    | 39   | 12   | 29   | 29    |
| 7969 | 39    | 25   | 20   | 74    | 26    | 35   | 10   | 22   | 18    |
| 7970 | 46    | 26   | 31   | 105   | 169   | 36   | 11.5 | 35   | 32    |
| 7971 | 37    | 31   | 23   | 108   | 27    | 38   | 11   | 35   | 45    |
| 7972 | 38    | 31   | 20   | 84    | 26    | 39.5 | 12   | 30   | 45    |
| 7973 | 55    | 51.5 | 25   | 111   | 40.5  | 51   | 19.5 | 44   | 52    |
| 7974 | 43    | 35.5 | 18.5 | 92.5  | 22    | 40   | 12   | 29   | 35    |
| 7975 | 40.5  | 25   | 22   | 118   | 25    | 40.5 | 13   | 41   | 27    |
| 7976 | 46    | 33.5 | 23   | 114   | 27    | 39   | 13   | 37   | 41    |
| 7977 | 42    | 28   | 18   | 92    | 30    | 36   | 10   | 26   | 33    |
| 7978 | 44    | 29   | 22   | 112   | 121.5 | 43   | 12   | 34.5 | 31    |
| 7979 | 45    | 42   | 23   | 94.5  | 32    | 43   | 14   | 34   | 53    |
| 7980 | 52    | 38   | 32   | 119   | 37    | 41   | 16   | 43   | 77    |
| 7981 | 62.5  | 80   | 37   | 157.5 | 35    | 63   | 26   | 69   | 77    |
| 7982 | 43    | 27   | 20   | 99    | 72.5  | 39   | 11   | 53   | 113   |
| 7983 | 93.5  | 28   | 27   | 135   | 30    | 42.5 | 27   | 37   | 47    |
| 7984 | 58    | 24   | 17   | 56    | 24    | 43   | 16   | 35   | 21    |
| 7985 | 28    | 21   | 10   | 28    | 16    | 37   | 7    | 13.5 | 13    |
| 7986 | 33    | 25   | 25   | 161   | 13    | 34   | 10   | 31.5 | 19    |
| 7987 | 39.5  | 33   | 34   | 74    | 32    | 41   | 85   | 36   | 50    |
| 7988 | 36    | 24   | 16   | 78    | 23    | 39   | 10   | 21   | 41    |

|      |       |      |      |       |      |      |      |      |      |
|------|-------|------|------|-------|------|------|------|------|------|
| 7989 | 34    | 22.5 | 16   | 80    | 20   | 36   | 8    | 19   | 32   |
| 7990 | 45    | 54.5 | 30   | 85    | 33   | 49   | 19   | 51   | 90   |
| 7991 | 50    | 36   | 18   | 95    | 28   | 52.5 | 14   | 29.5 | 46   |
| 7992 | 48    | 38   | 22   | 99    | 27   | 46   | 16   | 49   | 67   |
| 7993 | 41    | 26   | 19   | 69    | 21   | 41   | 12   | 24   | 24.5 |
| 7994 | 39    | 53   | 26   | 73    | 32   | 36   | 32   | 56   | 64   |
| 7995 | 47    | 27   | 25   | 72    | 20   | 37   | 12.5 | 25   | 30   |
| 7996 | 53    | 27.5 | 17   | 79.5  | 30   | 55   | 9    | 19   | 30   |
| 7997 | 37.5  | 25   | 18   | 73    | 19   | 37   | 12.5 | 21.5 | 23.5 |
| 7998 | 36.5  | 25   | 19   | 84    | 20   | 38   | 11   | 24   | 26   |
| 7999 | 35    | 33   | 19   | 60    | 53.5 | 39   | 13   | 33   | 32   |
| 8000 | 46    | 24   | 35   | 98    | 25   | 37.5 | 28   | 28   | 47   |
| 8001 | 44    | 50   | 23   | 90    | 24   | 44   | 18   | 39   | 62.5 |
| 8002 | 61.5  | 47   | 29   | 134   | 30   | 49   | 19   | 58.5 | 76   |
| 8003 | 44    | 46   | 25   | 85.5  | 30   | 45   | 19   | 52.5 | 51   |
| 8004 | 46    | 37   | 22   | 94    | 22   | 44   | 16   | 36   | 35   |
| 8005 | 40    | 50   | 26   | 72    | 34   | 42   | 19   | 54   | 39   |
| 8006 | 30    | 24   | 16   | 92    | 27   | 34   | 9    | 25   | 21   |
| 8007 | 31    | 21.5 | 14   | 90    | 17   | 33   | 8    | 21   | 40   |
| 8008 | 52.5  | 46   | 25   | 134.5 | 64   | 54   | 19   | 44.5 | 43   |
| 8009 | 59    | 31.5 | 17   | 99    | 24   | 31   | 18   | 41   | 36   |
| 8010 | 42    | 36   | 25   | 95    | 23   | 41   | 15   | 40   | 50   |
| 8011 | 305.5 | 41   | 19   | 96.5  | 20.5 | 41.5 | 15   | 36   | 44   |
| 8012 | 29    | 21   | 16   | 84    | 18   | 33   | 9    | 21   | 20   |
| 8013 | 42.5  | 38   | 19   | 63    | 25   | 43.5 | 16   | 30   | 32   |
| 8014 | 45    | 38   | 18.5 | 81    | 21.5 | 46   | 14   | 42   | 42.5 |
| 8015 | 31    | 21   | 12   | 54    | 16   | 34   | 8    | 21   | 42.5 |
| 8016 | 30    | 22   | 15   | 70    | 14   | 36   | 7    | 18   | 25   |
| 8017 | 26    | 17   | 14   | 60    | 52   | 20   | 10   | 29   | 13   |
| 8018 | 32    | 22   | 13   | 92    | 18   | 35   | 9    | 20   | 15   |
| 8019 | 38    | 30   | 17   | 83    | 20   | 37   | 11   | 33   | 26   |
| 8020 | 41    | 54   | 29   | 104   | 27   | 38   | 25   | 60   | 98   |
| 8021 | 33    | 26   | 16   | 78    | 28.5 | 27.5 | 11   | 26   | 23   |
| 8022 | 64    | 20   | 15.5 | 85.5  | 20   | 31   | 10   | 27   | 30   |
| 8023 | 31    | 20   | 12.5 | 52    | 21   | 30.5 | 9    | 18   | 21   |
| 8024 | 38    | 22   | 15   | 79    | 20   | 33   | 13   | 26   | 37   |
| 8025 | 29.5  | 21   | 18   | 86    | 18   | 20   | 11   | 32   | 29   |
| 8026 | 137   | 29   | 17   | 74.5  | 25   | 42   | 12   | 24   | 24   |
| 8027 | 44    | 40.5 | 22   | 86    | 34   | 46   | 20   | 55   | 42   |
| 8028 | 35    | 24   | 14   | 73    | 19   | 35   | 10   | 25   | 19.5 |
| 8029 | 47    | 55.5 | 24   | 82    | 26   | 44   | 19   | 58   | 59   |
| 8030 | 29    | 15   | 13.5 | 73    | 16   | 21   | 10   | 25   | 16   |
| 8031 | 37    | 18   | 12   | 68    | 30   | 33   | 9    | 17.5 | 63   |
| 8032 | 33    | 26   | 18   | 103   | 22   | 27   | 36   | 32   | 30   |
| 8033 | 53    | 25   | 15   | 77    | 24   | 34   | 10   | 22   | 30   |
| 8034 | 48    | 35   | 21   | 135   | 24   | 39   | 13   | 30   | 29   |
| 8035 | 43    | 20   | 15   | 55    | 21   | 31   | 11   | 20.5 | 25   |

|      |      |      |      |      |       |      |      |      |      |
|------|------|------|------|------|-------|------|------|------|------|
| 8036 | 32   | 16   | 11   | 57.5 | 18    | 25   | 14   | 20   | 26   |
| 8037 | 35.5 | 22   | 13   | 65   | 16    | 34.5 | 9    | 29   | 17   |
| 8038 | 48   | 20   | 14   | 83   | 19    | 33   | 27   | 32   | 26   |
| 8039 | 48   | 67   | 32   | 121  | 30    | 55.5 | 28   | 60   | 92   |
| 8040 | 55   | 66   | 31.5 | 92   | 35    | 46   | 31   | 61   | 74   |
| 8041 | 42   | 37   | 22   | 78   | 25    | 35   | 15   | 39   | 52.5 |
| 8042 | 64   | 36   | 21   | 93   | 26    | 53   | 13   | 30   | 40   |
| 8043 | 74   | 99.5 | 49   | 131  | 49.5  | 84   | 32   | 77   | 84   |
| 8044 | 47   | 41   | 22   | 83   | 22.5  | 64   | 13   | 27   | 56   |
| 8045 | 28   | 27.5 | 13   | 40   | 23.5  | 41   | 9    | 15   | 19   |
| 8046 | 92   | 43.5 | 25   | 69   | 79.5  | 83   | 21   | 37   | 49   |
| 8047 | 42   | 37   | 16   | 47.5 | 42    | 54   | 12   | 32   | 26   |
| 8048 | 56   | 33   | 23   | 67   | 41    | 44   | 21.5 | 33   | 26.5 |
| 8049 | 55   | 36   | 33   | 142  | 36.5  | 56   | 14   | 32   | 42   |
| 8050 | 48.5 | 37   | 27.5 | 51.5 | 29    | 52   | 11   | 23   | 26   |
| 8051 | 83   | 36   | 19   | 50   | 36    | 49   | 23   | 37.5 | 23   |
| 8052 | 33   | 31   | 14   | 49   | 28    | 45.5 | 8    | 17   | 22   |
| 8053 | 43   | 30   | 16   | 55   | 27.5  | 45.5 | 16   | 18   | 20   |
| 8054 | 114  | 34   | 19   | 51   | 36    | 50   | 13   | 32   | 33   |
| 8055 | 47   | 60   | 79   | 103  | 29    | 50   | 24   | 54   | 65   |
| 8056 | 34.5 | 32   | 13   | 52   | 21    | 46.5 | 9    | 20   | 20.5 |
| 8057 | 51   | 32   | 15   | 55   | 26    | 48   | 11   | 26   | 27   |
| 8058 | 35   | 30   | 17   | 76   | 872.5 | 38   | 8.5  | 17   | 21   |
| 8059 | 45   | 35   | 21   | 94   | 37    | 50   | 15   | 37   | 40   |
| 8060 | 41   | 31   | 32   | 101  | 29    | 49   | 12   | 26   | 26   |
| 8061 | 34   | 29   | 20   | 63.5 | 24    | 44   | 12   | 20.5 | 37.5 |
| 8062 | 37   | 37   | 20   | 69   | 25    | 48   | 12   | 25   | 80.5 |
| 8063 | 34   | 28   | 18   | 97.5 | 19    | 41.5 | 10   | 20   | 24   |
| 8064 | 54   | 77.5 | 43   | 99   | 37    | 63   | 32   | 66   | 75.5 |
| 8065 | 78   | 53.5 | 36   | 89.5 | 35.5  | 61   | 18   | 43   | 56   |
| 8066 | 44   | 34   | 21.5 | 99   | 79.5  | 47   | 12   | 29   | 34   |
| 8067 | 36.5 | 28   | 15   | 73   | 24    | 42   | 11   | 45   | 32   |
| 8068 | 34.5 | 29   | 17   | 77   | 22.5  | 42   | 10   | 22   | 25   |
| 8069 | 46.5 | 51   | 23   | 87   | 28    | 53   | 17   | 36   | 48   |
| 8070 | 52.5 | 36   | 16   | 77   | 26.5  | 48   | 11.5 | 37   | 30.5 |
| 8071 | 39   | 56   | 28   | 103  | 33    | 54   | 18   | 43.5 | 59   |
| 8072 | 40   | 36   | 18   | 82.5 | 25.5  | 48   | 12   | 24   | 29   |
| 8073 | 38   | 37   | 21   | 105  | 26    | 47   | 13   | 29   | 37   |
| 8074 | 39   | 47   | 23   | 107  | 28    | 52   | 15   | 36   | 47   |
| 8075 | 50   | 45   | 22   | 105  | 48    | 54   | 15   | 32   | 41   |
| 8076 | 47   | 74   | 33   | 114  | 35.5  | 60   | 25   | 67   | 62   |
| 8077 | 38   | 25   | 15   | 63.5 | 25    | 37   | 10   | 20   | 33   |
| 8078 | 45.5 | 41   | 23.5 | 81   | 29    | 54   | 14   | 35   | 33   |
| 8079 | 36   | 37   | 24   | 94.5 | 30    | 40   | 15   | 31   | 52   |
| 8080 | 36   | 34.5 | 24   | 69   | 27    | 47   | 14   | 26   | 47   |
| 8081 | 48   | 53.5 | 29   | 84   | 42.5  | 55   | 25   | 58   | 55   |
| 8082 | 32.5 | 30   | 20   | 83   | 40.5  | 41.5 | 10   | 23   | 74   |

|      |      |      |      |       |      |      |      |      |      |
|------|------|------|------|-------|------|------|------|------|------|
| 8083 | 41.5 | 53   | 25   | 90    | 27.5 | 52   | 19   | 35.5 | 51   |
| 8084 | 51.5 | 49   | 27   | 103.5 | 31   | 50   | 18   | 44   | 47   |
| 8085 | 38   | 51   | 27   | 90    | 28   | 51   | 21   | 48   | 59   |
| 8086 | 39   | 41   | 25.5 | 94    | 26.5 | 48   | 13   | 32   | 37   |
| 8087 | 33.5 | 35.5 | 19   | 70    | 32   | 41   | 14   | 29   | 39   |
| 8088 | 39.5 | 42.5 | 25   | 71    | 27   | 43   | 17   | 31   | 40   |
| 8089 | 34   | 33   | 17   | 73.5  | 26   | 44   | 9    | 22   | 54   |
| 8090 | 51   | 58   | 27.5 | 117   | 28   | 57   | 20   | 48   | 88   |
| 8091 | 36.5 | 33.5 | 17   | 60.5  | 23   | 44   | 16   | 23   | 45   |
| 8092 | 27   | 41   | 31   | 73    | 20   | 41   | 13.5 | 20   | 92   |
| 8093 | 31   | 35   | 15   | 90    | 25   | 39   | 9    | 21   | 26   |
| 8094 | 41   | 26   | 18   | 92    | 37   | 40   | 17   | 27   | 35   |
| 8095 | 35   | 31   | 22   | 86.5  | 35   | 46   | 15   | 24   | 33   |
| 8096 | 75   | 33   | 34   | 74    | 36   | 43   | 16   | 30   | 28   |
| 8097 | 39   | 36   | 21   | 72.5  | 25   | 45.5 | 12   | 21   | 114  |
| 8098 | 37   | 35.5 | 17   | 68    | 23   | 44   | 12   | 25   | 41   |
| 8099 | 27   | 30   | 15   | 50    | 46   | 36   | 10   | 19.5 | 26   |
| 8100 | 35   | 36   | 17   | 60    | 21.5 | 41   | 14   | 27   | 36   |
| 8101 | 88.5 | 39   | 18   | 66    | 27   | 74   | 15   | 32   | 47   |
| 8102 | 29   | 32   | 15   | 47    | 19   | 39   | 10   | 26   | 48.5 |
| 8103 | 32   | 27   | 16   | 76    | 22   | 42   | 8    | 18   | 27   |
| 8104 | 34   | 32   | 16   | 51.5  | 19.5 | 39.5 | 11   | 22   | 53   |
| 8105 | 30   | 22   | 17   | 52    | 18.5 | 36.5 | 8    | 12   | 41.5 |
| 8106 | 28   | 26   | 13   | 55    | 17   | 34   | 9    | 15   | 57.5 |
| 8107 | 34   | 25   | 13   | 50    | 18   | 33.5 | 8.5  | 18   | 27   |
| 8108 | 37   | 25   | 32   | 115.5 | 29   | 40   | 13   | 30   | 23   |
| 8109 | 30   | 24   | 15   | 91.5  | 25.5 | 40   | 10   | 19   | 24   |
| 8110 | 24   | 20   | 16   | 61    | 24   | 33   | 10   | 16   | 21   |
| 8111 | 23   | 24   | 14   | 44    | 25   | 33   | 10   | 38   | 25.5 |
| 8112 | 43.5 | 31   | 32   | 132   | 33   | 53   | 11   | 36   | 46   |
| 8113 | 36   | 25   | 16   | 54    | 20   | 38   | 11   | 20   | 18.5 |
| 8114 | 54   | 26   | 16   | 56    | 32   | 39   | 25   | 27.5 | 20   |
| 8115 | 34   | 32   | 19   | 87.5  | 29   | 50   | 15   | 27   | 22   |
| 8116 | 57   | 49   | 28   | 101   | 27.5 | 71   | 13   | 22   | 62   |
| 8117 | 54   | 49   | 23   | 73    | 32   | 72   | 15   | 22   | 63   |
| 8118 | 99   | 80   | 36   | 201   | 40   | 94   | 25.5 | 53.5 | 92   |
| 8119 | 120  | 71   | 47   | 108   | 54.5 | 93   | 31   | 99   | 77   |
| 8120 | 50.5 | 48   | 33   | 117   | 39   | 70   | 16   | 33   | 66   |
| 8121 | 98   | 50.5 | 25   | 69    | 31   | 92.5 | 12   | 55   | 64   |
| 8122 | 61   | 62   | 28   | 77    | 33   | 81   | 17   | 37   | 59   |
| 8123 | 71   | 49   | 46   | 82    | 42   | 76   | 12   | 24   | 50   |
| 8124 | 59.5 | 60   | 42   | 85    | 31   | 77.5 | 17   | 34   | 45   |
| 8125 | 55   | 42   | 21   | 72    | 28   | 70   | 13   | 21   | 67   |
| 8126 | 66   | 42   | 22   | 68    | 22   | 70   | 12   | 23   | 37   |
| 8127 | 62.5 | 46   | 23   | 79    | 31   | 66   | 16   | 29   | 92.5 |
| 8128 | 64   | 46.5 | 28   | 94    | 40   | 73   | 26   | 28   | 54   |
| 8129 | 62   | 62   | 27   | 88    | 40   | 76   | 14.5 | 50   | 53   |

|      |      |      |      |      |      |      |      |      |      |
|------|------|------|------|------|------|------|------|------|------|
| 8130 | 94   | 66   | 28   | 75   | 32   | 103  | 19   | 37.5 | 52   |
| 8131 | 206  | 49   | 27.5 | 71   | 31.5 | 71   | 18   | 25   | 43   |
| 8132 | 61.5 | 48.5 | 24   | 66   | 39   | 68   | 13   | 21   | 54.5 |
| 8133 | 51.5 | 40   | 23   | 71   | 59.5 | 66.5 | 12   | 25   | 38   |
| 8134 | 86   | 62   | 27   | 93.5 | 35   | 97   | 18   | 42   | 58   |
| 8135 | 62   | 51   | 25   | 84   | 38   | 76   | 13   | 27   | 53   |
| 8136 | 60   | 47   | 36   | 145  | 28.5 | 70   | 15   | 45   | 57   |
| 8137 | 56   | 49   | 22   | 75.5 | 33   | 67   | 13   | 24   | 43   |
| 8138 | 49   | 53   | 27   | 66   | 25   | 70   | 16   | 36   | 50   |
| 8139 | 60   | 53   | 26   | 117  | 31   | 70   | 44   | 35   | 57   |
| 8140 | 63   | 50   | 23   | 76   | 33.5 | 73   | 23   | 43   | 51   |
| 8141 | 55   | 38   | 20   | 67   | 26   | 69   | 11   | 18   | 41   |
| 8142 | 64   | 82   | 44   | 94   | 95   | 91.5 | 25.5 | 52.5 | 76   |
| 8143 | 59.5 | 68   | 26.5 | 99   | 27   | 84   | 18   | 46   | 59   |
| 8144 | 44   | 39   | 18.5 | 49   | 21   | 61   | 12   | 20   | 54   |
| 8145 | 66   | 52   | 23   | 95   | 29.5 | 70   | 17   | 29   | 52   |
| 8146 | 57   | 47.5 | 20.5 | 87.5 | 26.5 | 73   | 13   | 25   | 44   |
| 8147 | 59   | 64   | 30   | 91.5 | 40.5 | 70   | 21   | 42   | 69   |
| 8148 | 50   | 37   | 17   | 70   | 29   | 61   | 11   | 22   | 29   |
| 8149 | 50   | 40   | 22   | 49   | 26   | 69   | 12   | 17   | 33   |
| 8150 | 45   | 35.5 | 19   | 59   | 48   | 56   | 10.5 | 17   | 37   |
| 8151 | 49.5 | 40   | 21   | 70   | 25   | 66   | 15   | 24   | 42   |
| 8152 | 54.5 | 42   | 23   | 65   | 22   | 69   | 16   | 27   | 52   |
| 8153 | 54   | 38   | 22   | 74   | 33   | 67   | 37   | 23   | 50   |
| 8154 | 52.5 | 45   | 23   | 82   | 25.5 | 69   | 15   | 29   | 41   |
| 8155 | 50.5 | 33.5 | 16   | 41   | 22   | 59   | 10   | 13   | 23   |
| 8156 | 61   | 36   | 19   | 34   | 29   | 61.5 | 9    | 40   | 24   |
| 8157 | 53.5 | 40   | 15   | 67   | 20.5 | 63   | 17   | 17   | 27   |
| 8158 | 38   | 36   | 10   | 23   | 21   | 56   | 8    | 14   | 22.5 |
| 8159 | 52   | 37   | 20   | 65   | 26   | 57   | 11   | 35   | 30   |
| 8160 | 57.5 | 38   | 16   | 48   | 69.5 | 60   | 12   | 79   | 26   |
| 8161 | 45   | 37   | 14   | 26   | 21.5 | 58   | 9    | 29   | 24   |
| 8162 | 30.5 | 30   | 15   | 31   | 38   | 50   | 10   | 15   | 30   |
| 8163 | 62   | 34.5 | 17   | 45   | 37   | 63   | 26   | 27.5 | 26   |
| 8164 | 60   | 36   | 18   | 48   | 27.5 | 60   | 10   | 16   | 38.5 |
| 8165 | 39   | 33   | 12   | 41.5 | 33   | 56   | 9    | 48   | 20   |
| 8166 | 40   | 35   | 15   | 43   | 19.5 | 54   | 8    | 15   | 29   |
| 8167 | 61   | 32   | 29   | 160  | 38   | 50   | 34   | 29   | 34   |
| 8168 | 37   | 34   | 12   | 50   | 27   | 56   | 8    | 12.5 | 25   |
| 8169 | 32   | 34   | 11   | 23   | 24   | 54   | 9    | 12   | 21   |
| 8170 | 44.5 | 38   | 18   | 66   | 37   | 56   | 12   | 32   | 27   |
| 8171 | 54.5 | 45.5 | 19   | 54   | 36   | 67   | 13   | 78.5 | 47   |
| 8172 | 41   | 34   | 11   | 88   | 23.5 | 49   | 8    | 16   | 20   |
| 8173 | 51   | 36   | 16.5 | 59   | 27   | 60   | 19   | 52   | 25   |
| 8174 | 40   | 37   | 14   | 36   | 22.5 | 55   | 8    | 14   | 47   |
| 8175 | 55   | 38   | 19   | 60   | 36   | 58.5 | 20   | 18   | 41   |
| 8176 | 45   | 32   | 13   | 34   | 16   | 57   | 9    | 14   | 23.5 |



|      |       |      |      |      |      |      |      |      |      |
|------|-------|------|------|------|------|------|------|------|------|
| 8177 | 41    | 37   | 14   | 24.5 | 19   | 53   | 29   | 18.5 | 27   |
| 8178 | 50    | 33   | 14   | 41   | 20   | 55   | 8.5  | 18   | 22   |
| 8179 | 58    | 34   | 12.5 | 29   | 20   | 57   | 8    | 20   | 19   |
| 8180 | 37    | 33   | 12   | 42   | 21   | 51   | 9    | 19   | 21   |
| 8181 | 43    | 33   | 12   | 51   | 22   | 52   | 9    | 14   | 25.5 |
| 8182 | 44    | 34.5 | 13   | 47   | 21   | 60   | 8    | 15   | 26   |
| 8183 | 83    | 28.5 | 114  | 47.5 | 26   | 46   | 14   | 114  | 113  |
| 8184 | 253   | 38   | 28   | 45   | 28.5 | 65   | 16   | 172  | 30   |
| 8185 | 62    | 36   | 15   | 39   | 40   | 63   | 16   | 35   | 27   |
| 8186 | 110   | 33   | 16   | 34.5 | 28   | 54   | 10.5 | 20   | 29   |
| 8187 | 55.5  | 30   | 16   | 32   | 28   | 52   | 12   | 19   | 24   |
| 8188 | 105   | 46   | 17   | 75   | 31   | 106  | 15   | 30   | 52   |
| 8189 | 59    | 33   | 15   | 33   | 28.5 | 54   | 13   | 30   | 23   |
| 8190 | 51    | 27   | 11   | 58   | 22   | 46   | 11   | 15   | 20   |
| 8191 | 44    | 32   | 18.5 | 84   | 20   | 55   | 9    | 21   | 38   |
| 8192 | 38    | 29   | 11   | 40   | 21   | 49   | 8    | 13.5 | 17   |
| 8193 | 43    | 31   | 12   | 68   | 19   | 49.5 | 8    | 14   | 21   |
| 8194 | 36    | 27   | 11   | 43   | 16.5 | 48   | 7    | 14   | 21   |
| 8195 | 45    | 44   | 18   | 69   | 20   | 54.5 | 13   | 23   | 42.5 |
| 8196 | 85    | 30   | 13   | 36   | 24.5 | 50   | 10   | 15   | 30   |
| 8197 | 36    | 24.5 | 13   | 53   | 17   | 34   | 9    | 13   | 46.5 |
| 8198 | 34    | 23.5 | 16   | 30.5 | 23   | 34.5 | 11   | 18   | 38   |
| 8199 | 72    | 41   | 69   | 116  | 34.5 | 56   | 18   | 41   | 52   |
| 8200 | 37    | 27.5 | 15   | 55   | 25.5 | 46   | 13   | 17.5 | 25   |
| 8201 | 61    | 31   | 25   | 21   | 22   | 55   | 10   | 14   | 30   |
| 8202 | 59    | 32   | 35   | 31   | 24   | 54   | 12   | 16   | 27   |
| 8203 | 161.5 | 39   | 18   | 55.5 | 38.5 | 78.5 | 11   | 19   | 34   |
| 8204 | 51    | 34   | 20   | 173  | 26   | 56   | 49   | 30   | 90   |
| 8205 | 30    | 23   | 13   | 42   | 21   | 42.5 | 9    | 32.5 | 26   |
| 8206 | 48    | 34   | 22   | 63   | 34   | 54   | 43   | 22   | 54   |
| 8207 | 39    | 34.5 | 18   | 56.5 | 53   | 51   | 15   | 16   | 50   |
| 8208 | 40    | 26   | 17   | 62   | 30   | 46   | 13   | 23.5 | 53   |
| 8209 | 87    | 33   | 24   | 113  | 30   | 55   | 17   | 38.5 | 54.5 |
| 8210 | 30    | 27   | 13   | 47   | 29   | 35   | 11   | 16.5 | 24   |
| 8211 | 47    | 41   | 20   | 114  | 23   | 56   | 17   | 33   | 32   |
| 8212 | 49    | 35   | 16   | 74   | 20   | 59   | 12   | 21   | 45   |
| 8213 | 54    | 48.5 | 22   | 74   | 32   | 65   | 17   | 29.5 | 44   |
| 8214 | 42    | 30   | 18   | 60   | 22.5 | 52   | 9    | 18   | 46   |
| 8215 | 48    | 51   | 24   | 71   | 25   | 59   | 17   | 35   | 91   |
| 8216 | 178   | 55.5 | 25   | 72   | 40   | 77.5 | 21   | 43.5 | 49.5 |
| 8217 | 66    | 100  | 32   | 81   | 41   | 70.5 | 24   | 53   | 85.5 |
| 8218 | 48    | 57   | 27   | 70   | 27   | 57   | 21   | 44   | 56   |
| 8219 | 54    | 75   | 38   | 103  | 52.5 | 68   | 22   | 56   | 73   |
| 8220 | 42    | 33   | 14   | 75   | 24   | 52   | 10   | 19   | 26   |
| 8221 | 46    | 31   | 15   | 55   | 20.5 | 47   | 10   | 17   | 31   |
| 8222 | 37    | 27   | 14   | 51.5 | 24   | 48   | 9    | 17   | 40   |
| 8223 | 58    | 43   | 23.5 | 63   | 28   | 56.5 | 14   | 32   | 50   |

|      |      |      |      |      |      |      |      |      |      |
|------|------|------|------|------|------|------|------|------|------|
| 8224 | 59.5 | 58   | 30   | 53   | 34   | 72   | 17.5 | 38   | 52   |
| 8225 | 51.5 | 54   | 25   | 83.5 | 44.5 | 63   | 23   | 45.5 | 55   |
| 8226 | 54   | 62   | 29   | 83.5 | 31   | 70.5 | 27.5 | 49   | 67   |
| 8227 | 43   | 40   | 25.5 | 69   | 24   | 51   | 12   | 23.5 | 34   |
| 8228 | 45.5 | 46   | 23   | 67   | 26   | 58   | 17   | 31   | 45   |
| 8229 | 60   | 55   | 30   | 75   | 28   | 56   | 29   | 51.5 | 58   |
| 8230 | 84   | 43   | 24   | 58.5 | 24.5 | 105  | 16   | 29   | 40   |
| 8231 | 50   | 28   | 17   | 65.5 | 19.5 | 42   | 9.5  | 31   | 33.5 |
| 8232 | 80.5 | 39   | 21   | 54.5 | 20   | 79   | 12   | 26   | 35.5 |
| 8233 | 40   | 30   | 15   | 71   | 19   | 50   | 11   | 19   | 71.5 |
| 8234 | 77   | 37   | 23.5 | 59   | 21.5 | 64   | 11   | 21   | 32   |
| 8235 | 51   | 61   | 26   | 81   | 29.5 | 62   | 21   | 42   | 59.5 |
| 8236 | 40   | 37   | 19.5 | 70   | 26.5 | 45   | 13.5 | 29   | 68   |
| 8237 | 53   | 53   | 24   | 80.5 | 34   | 58   | 20   | 34.5 | 68   |
| 8238 | 42   | 29   | 18   | 55.5 | 21   | 54.5 | 11   | 21   | 48   |
| 8239 | 71   | 53   | 26.5 | 72.5 | 30   | 50   | 22   | 41   | 68   |
| 8240 | 58   | 43   | 29   | 63   | 23   | 63   | 13   | 27.5 | 56   |
| 8241 | 62   | 67.5 | 28   | 81   | 29   | 68.5 | 21   | 56   | 81   |
| 8242 | 99   | 53.5 | 21   | 79   | 27   | 91.5 | 13   | 29   | 44.5 |
| 8243 | 84.5 | 56   | 24   | 87.5 | 44   | 85   | 18   | 39   | 64   |
| 8244 | 48   | 43   | 19   | 76   | 20   | 62   | 12   | 26   | 36   |
| 8245 | 65.5 | 50   | 23   | 93   | 30   | 79   | 16   | 38   | 45   |
| 8246 | 60   | 37   | 20   | 67   | 32   | 58   | 16   | 32   | 42   |
| 8247 | 45   | 41.5 | 21   | 103  | 24   | 56   | 15   | 30   | 46   |
| 8248 | 45   | 44   | 22   | 60   | 29.5 | 57   | 14   | 40   | 44   |
| 8249 | 58.5 | 54   | 28   | 76   | 33   | 62   | 21   | 41   | 43   |
| 8250 | 47.5 | 55   | 27   | 72   | 27   | 62   | 19   | 40   | 64.5 |
| 8251 | 49.5 | 31   | 20   | 75   | 19.5 | 49.5 | 17   | 23   | 34   |
| 8252 | 45   | 33   | 23   | 78.5 | 19   | 51   | 11   | 22   | 40.5 |
| 8253 | 39   | 34   | 17.5 | 55   | 23   | 52   | 13   | 21   | 28   |
| 8254 | 89   | 31   | 16   | 83   | 20.5 | 50.5 | 10   | 22   | 30   |
| 8255 | 41   | 39   | 17   | 63   | 21   | 45   | 19   | 33   | 53   |
| 8256 | 59   | 39   | 18   | 96   | 20   | 60.5 | 14.5 | 27.5 | 37   |
| 8257 | 37   | 35   | 20   | 54   | 23   | 45   | 13.5 | 35.5 | 38   |
| 8258 | 69   | 72   | 38   | 87   | 29   | 63   | 39.5 | 59.5 | 77   |
| 8259 | 54   | 59.5 | 25   | 73.5 | 29   | 60.5 | 19   | 63   | 76   |
| 8260 | 49.5 | 49.5 | 25   | 75   | 33   | 54   | 20   | 38   | 59   |
| 8261 | 55   | 64   | 29   | 77   | 29   | 66   | 22   | 39   | 67   |
| 8262 | 44   | 45   | 22   | 75.5 | 22   | 54   | 15   | 36   | 44   |
| 8263 | 44   | 51   | 26   | 74   | 39.5 | 50   | 18   | 43   | 53   |
| 8264 | 58   | 56   | 21   | 59   | 23   | 73   | 14   | 36   | 51   |
| 8265 | 65   | 33   | 21   | 72   | 21   | 71   | 11   | 21   | 25   |
| 8266 | 36   | 28   | 15   | 49   | 25   | 49   | 9    | 18   | 31   |
| 8267 | 66   | 32   | 14   | 67   | 23   | 75   | 12   | 21   | 28   |
| 8268 | 53   | 56.5 | 28   | 83   | 34   | 54   | 17   | 42   | 52   |
| 8269 | 44   | 40   | 19   | 64   | 21.5 | 55   | 12   | 25.5 | 48   |
| 8270 | 41   | 26.5 | 18   | 66   | 29   | 45   | 9    | 19   | 51   |

|      |       |      |      |       |      |      |      |      |      |
|------|-------|------|------|-------|------|------|------|------|------|
| 8271 | 46    | 44.5 | 22   | 79    | 23   | 54   | 17   | 53   | 38   |
| 8272 | 36    | 30   | 16   | 53    | 16   | 46   | 10   | 19   | 36   |
| 8273 | 40    | 31   | 18.5 | 56.5  | 17   | 47   | 11   | 20   | 20.5 |
| 8274 | 63    | 69   | 28   | 92    | 26   | 62   | 20   | 52   | 72   |
| 8275 | 60.5  | 31   | 24   | 61    | 26   | 48.5 | 10   | 18   | 36   |
| 8276 | 40    | 30   | 18   | 56    | 25   | 42   | 13   | 23   | 26   |
| 8277 | 39    | 39   | 30   | 81    | 29   | 46.5 | 17   | 36   | 37   |
| 8278 | 34    | 28   | 18   | 65    | 26   | 33   | 15   | 38   | 34   |
| 8279 | 42.5  | 35   | 23   | 105.5 | 24.5 | 41   | 14   | 32   | 29   |
| 8280 | 50    | 23   | 16   | 46    | 29   | 39   | 10   | 26   | 27   |
| 8281 | 44    | 16   | 12   | 39    | 19   | 25   | 12   | 102  | 13   |
| 8282 | 35.5  | 26   | 20   | 59    | 27   | 33   | 17   | 31   | 19   |
| 8283 | 30.5  | 28   | 11   | 34    | 33   | 41.5 | 8    | 28   | 21   |
| 8284 | 43.5  | 25   | 17   | 38    | 26   | 35   | 23   | 37   | 21   |
| 8285 | 23.5  | 24   | 10   | 29    | 16   | 29   | 7    | 14   | 20   |
| 8286 | 52    | 24   | 31   | 41    | 20   | 32   | 9    | 15.5 | 17   |
| 8287 | 26    | 21   | 17   | 61    | 54.5 | 30   | 7    | 16.5 | 24   |
| 8288 | 27    | 21   | 10   | 55    | 24   | 25.5 | 9    | 17   | 15   |
| 8289 | 26    | 24   | 13   | 46.5  | 21   | 37   | 9    | 13   | 16   |
| 8290 | 37    | 27   | 12   | 39    | 25   | 34   | 9    | 19   | 17   |
| 8291 | 33.5  | 20   | 12   | 30    | 17   | 29.5 | 8    | 20   | 14.5 |
| 8292 | 20    | 20   | 13   | 43    | 31   | 25   | 8    | 15   | 18   |
| 8293 | 22.5  | 16   | 16   | 39    | 34   | 23   | 13   | 94   | 20   |
| 8294 | 19    | 17   | 10.5 | 58    | 15   | 23.5 | 13   | 14   | 10   |
| 8295 | 31    | 25   | 36   | 80.5  | 99.5 | 34   | 10   | 22.5 | 40   |
| 8296 | 56    | 35   | 20   | 86.5  | 22.5 | 57   | 19   | 27   | 32   |
| 8297 | 25    | 22   | 13   | 52    | 20.5 | 30   | 9    | 18   | 17   |
| 8298 | 24    | 20   | 11   | 49    | 19   | 29   | 13.5 | 32   | 19   |
| 8299 | 52    | 39   | 946  | 173.5 | 36   | 40.5 | 24   | 73   | 70   |
| 8300 | 24    | 19   | 15   | 30    | 28   | 29   | 10   | 22   | 15   |
| 8301 | 16.5  | 16   | 11   | 56    | 15.5 | 20   | 8    | 17   | 11   |
| 8302 | 39    | 16   | 13   | 61.5  | 23   | 19.5 | 59   | 22   | 34   |
| 8303 | 31    | 21   | 16   | 65    | 26   | 30   | 12   | 22   | 33.5 |
| 8304 | 31    | 39   | 13   | 40    | 26   | 38   | 8    | 17   | 22   |
| 8305 | 31    | 24   | 25.5 | 149   | 23   | 34   | 13   | 38   | 20   |
| 8306 | 30    | 20   | 16   | 108   | 22   | 22   | 9    | 21   | 31   |
| 8307 | 102.5 | 20   | 15   | 45    | 24   | 28   | 16   | 87   | 22   |
| 8308 | 34    | 22   | 13   | 81.5  | 27   | 42   | 9    | 20   | 20   |
| 8309 | 25    | 17   | 11   | 63    | 185  | 25   | 9    | 19   | 34   |
| 8310 | 39    | 17   | 15   | 50    | 21   | 24   | 7    | 32.5 | 11   |
| 8311 | 50    | 25   | 18   | 100   | 21   | 40.5 | 11   | 25   | 35   |
| 8312 | 38    | 41   | 25   | 86.5  | 79   | 49   | 14   | 28   | 52   |
| 8313 | 35    | 32   | 17   | 78    | 30   | 40.5 | 12   | 20   | 32   |
| 8314 | 45.5  | 50   | 30   | 81.5  | 31   | 48.5 | 21   | 45   | 42   |
| 8315 | 64    | 96.5 | 48   | 171   | 45   | 62   | 33.5 | 59   | 71   |
| 8316 | 59.5  | 53.5 | 37   | 118.5 | 60   | 59   | 21.5 | 43   | 84   |
| 8317 | 47    | 50   | 26   | 95    | 45.5 | 48   | 17   | 42   | 45   |

|      |       |      |      |       |      |      |      |      |      |
|------|-------|------|------|-------|------|------|------|------|------|
| 8318 | 834.5 | 66   | 26   | 70.5  | 33.5 | 98   | 15   | 35.5 | 60   |
| 8319 | 53    | 65   | 31.5 | 88    | 38   | 56   | 22   | 61   | 69   |
| 8320 | 92    | 46.5 | 24   | 85    | 29.5 | 109  | 10.5 | 30   | 79   |
| 8321 | 50    | 38   | 27   | 96.5  | 47.5 | 49   | 20   | 32   | 72   |
| 8322 | 63    | 66.5 | 35   | 144   | 36   | 86   | 25   | 51   | 80   |
| 8323 | 62.5  | 81   | 43.5 | 142   | 42   | 63.5 | 33   | 63   | 92   |
| 8324 | 42    | 46   | 29   | 97    | 51   | 46.5 | 15   | 35   | 47   |
| 8325 | 52    | 52   | 29.5 | 100   | 32   | 57   | 19   | 36   | 58.5 |
| 8326 | 66.5  | 80   | 38   | 117   | 40.5 | 58   | 31   | 66   | 79   |
| 8327 | 41    | 44   | 24   | 85.5  | 27   | 47   | 22   | 33   | 46   |
| 8328 | 42    | 32   | 26   | 114.5 | 33   | 42   | 15   | 31   | 36   |
| 8329 | 41    | 32.5 | 22   | 80.5  | 32   | 43   | 13   | 28   | 27   |
| 8330 | 57.5  | 59   | 26   | 99    | 29   | 66   | 14   | 30   | 64   |
| 8331 | 57    | 63.5 | 40   | 110   | 37   | 61   | 19   | 43.5 | 66   |
| 8332 | 28    | 30   | 18.5 | 77    | 22   | 39   | 10   | 22   | 40   |
| 8333 | 33.5  | 36   | 20.5 | 78    | 22   | 43.5 | 15   | 27   | 46   |
| 8334 | 61    | 65   | 34   | 114   | 34.5 | 58   | 21   | 48   | 85.5 |
| 8335 | 42    | 42   | 19   | 76    | 36   | 51   | 13   | 31   | 41   |
| 8336 | 40    | 26   | 20   | 118.5 | 26   | 41   | 13   | 33   | 44   |
| 8337 | 35.5  | 26   | 25   | 66    | 23   | 38   | 10.5 | 26   | 24   |
| 8338 | 77    | 62   | 26   | 117.5 | 34   | 90.5 | 18   | 39.5 | 73   |
| 8339 | 41    | 48   | 31   | 77    | 31   | 46   | 19   | 39   | 80   |
| 8340 | 32.5  | 28   | 14   | 73    | 20   | 35   | 10   | 19   | 34   |
| 8341 | 39.5  | 32   | 17   | 82    | 20.5 | 41   | 12   | 22   | 40   |
| 8342 | 46    | 42.5 | 24   | 96    | 36.5 | 43.5 | 16   | 31   | 47   |
| 8343 | 39    | 29   | 28   | 87.5  | 32   | 39   | 17   | 38   | 65   |
| 8344 | 37    | 28   | 20   | 76    | 25   | 42   | 12   | 33   | 44   |
| 8345 | 32.5  | 28   | 23   | 83    | 23   | 33   | 11   | 23   | 30   |
| 8346 | 40    | 45   | 25   | 89    | 33   | 48   | 18   | 37   | 67   |
| 8347 | 41    | 59   | 29   | 116.5 | 34   | 50.5 | 20   | 47   | 52   |
| 8348 | 37.5  | 52   | 28   | 73    | 29   | 45.5 | 19   | 43   | 64   |
| 8349 | 51.5  | 28   | 20   | 73    | 30   | 36.5 | 13   | 24   | 47   |
| 8350 | 80    | 77   | 36   | 146.5 | 36   | 65   | 26   | 59.5 | 75   |
| 8351 | 31.5  | 33   | 23   | 93    | 26   | 37.5 | 14   | 31   | 47   |
| 8352 | 29    | 29   | 22   | 74    | 28   | 34   | 12   | 23.5 | 32   |
| 8353 | 60    | 68   | 29.5 | 89    | 75   | 63.5 | 23   | 51   | 65   |
| 8354 | 42    | 42   | 25   | 80    | 31   | 42   | 15   | 38   | 82   |
| 8355 | 39    | 33   | 23   | 114.5 | 27   | 39   | 15   | 32   | 32   |
| 8356 | 67    | 55   | 22.5 | 92    | 27   | 66.5 | 14   | 33   | 47   |
| 8357 | 33    | 24   | 16   | 89    | 21   | 34   | 11   | 22   | 32   |
| 8358 | 37    | 49   | 29   | 98    | 33   | 43.5 | 19   | 36.5 | 50   |
| 8359 | 46    | 38   | 22   | 108   | 92.5 | 40   | 18   | 37   | 63   |
| 8360 | 31    | 28   | 20.5 | 77.5  | 26   | 32   | 11   | 28   | 30   |
| 8361 | 41    | 31   | 23   | 89    | 35   | 43   | 13   | 27   | 85   |
| 8362 | 71.5  | 44   | 36   | 126.5 | 34   | 52.5 | 22   | 55   | 79   |
| 8363 | 46.5  | 33   | 18.5 | 82    | 40   | 38   | 16   | 27   | 40.5 |
| 8364 | 58    | 37   | 25   | 109.5 | 31   | 39.5 | 17   | 36.5 | 42   |

|      |       |      |      |      |       |      |      |       |      |
|------|-------|------|------|------|-------|------|------|-------|------|
| 8365 | 157.5 | 67   | 38   | 171  | 31    | 61   | 26   | 69    | 70   |
| 8366 | 36    | 54   | 31   | 102  | 33.5  | 45   | 21   | 45    | 58   |
| 8367 | 47    | 42   | 20.5 | 78   | 90    | 43   | 16   | 35    | 47   |
| 8368 | 31    | 23   | 13   | 69   | 31    | 34   | 10   | 17    | 22   |
| 8369 | 30    | 26   | 17   | 65.5 | 19    | 34   | 9    | 16    | 24   |
| 8370 | 107   | 32   | 19   | 79   | 27    | 70   | 12   | 25    | 45   |
| 8371 | 27    | 27   | 13   | 60   | 25    | 33   | 10   | 19    | 22   |
| 8372 | 22    | 22   | 14   | 60   | 25    | 32   | 8    | 15    | 19   |
| 8373 | 22    | 24.5 | 12   | 48   | 19    | 31   | 7    | 15    | 13   |
| 8374 | 69    | 28   | 22   | 52   | 32    | 39   | 23   | 82.5  | 29   |
| 8375 | 28    | 23   | 14   | 43   | 36    | 31.5 | 9.5  | 17    | 24   |
| 8376 | 23    | 22   | 13   | 58   | 24    | 29.5 | 16   | 19    | 18   |
| 8377 | 24.5  | 23   | 15   | 62   | 25    | 33   | 10   | 17    | 21   |
| 8378 | 32    | 26   | 14   | 67   | 20    | 37   | 9    | 17    | 29.5 |
| 8379 | 31.5  | 25   | 16   | 64   | 26    | 34   | 11   | 20.5  | 19   |
| 8380 | 28    | 24   | 37.5 | 44   | 26    | 32.5 | 11   | 22    | 49   |
| 8381 | 22    | 22   | 127  | 38   | 19.5  | 32   | 10.5 | 31    | 16   |
| 8382 | 31    | 27   | 18   | 117  | 26.5  | 31   | 10   | 42    | 19   |
| 8383 | 30    | 22   | 13.5 | 66   | 23    | 29   | 10   | 17    | 17   |
| 8384 | 31    | 22   | 14   | 67.5 | 21    | 31   | 13   | 19    | 29   |
| 8385 | 26.5  | 19   | 12   | 46   | 19    | 29   | 13   | 37    | 18   |
| 8386 | 156.5 | 54   | 53   | 267  | 65.5  | 70.5 | 71   | 189.5 | 41   |
| 8387 | 28    | 22   | 11   | 41   | 23    | 32.5 | 7    | 21.5  | 15   |
| 8388 | 60.5  | 30   | 27   | 58   | 38    | 39   | 27   | 70    | 28   |
| 8389 | 103.5 | 38   | 26.5 | 88   | 42    | 42   | 34   | 97    | 175  |
| 8390 | 51.5  | 32   | 28   | 121  | 84    | 35.5 | 20   | 50.5  | 56   |
| 8391 | 41    | 26   | 18   | 52   | 33.5  | 36   | 26.5 | 102.5 | 31   |
| 8392 | 13.5  | 18   | 6    | 15   | 11    | 22   | 6    | 14    | 10   |
| 8393 | 35    | 27   | 24   | 92.5 | 444   | 32   | 12   | 27    | 51   |
| 8394 | 51.5  | 32   | 18   | 79   | 32.5  | 54   | 9    | 22    | 29   |
| 8395 | 21.5  | 18   | 8    | 46   | 17    | 25   | 6    | 17    | 11   |
| 8396 | 76    | 22   | 19   | 65   | 39    | 32   | 34   | 84.5  | 19   |
| 8397 | 50    | 22.5 | 17   | 60   | 41    | 35   | 20   | 24    | 23   |
| 8398 | 22    | 22   | 17   | 51.5 | 30.5  | 27   | 11   | 23    | 17   |
| 8399 | 24    | 19   | 17   | 148  | 24.5  | 27.5 | 9    | 23    | 19   |
| 8400 | 30    | 24   | 65   | 63   | 24    | 32   | 13   | 23    | 146  |
| 8401 | 28    | 22   | 17   | 64   | 22    | 30   | 9    | 26.5  | 61.5 |
| 8402 | 35    | 33   | 20   | 101  | 32    | 33.5 | 12   | 34    | 27   |
| 8403 | 38    | 19   | 16   | 107  | 24    | 25   | 18   | 53.5  | 48   |
| 8404 | 31    | 22.5 | 15.5 | 43   | 20    | 30   | 12   | 17    | 18   |
| 8405 | 28    | 20   | 14   | 81   | 20.5  | 27.5 | 18   | 28    | 11   |
| 8406 | 18    | 18   | 11   | 39   | 14    | 27   | 8    | 13    | 11   |
| 8407 | 36    | 21   | 19   | 90   | 357.5 | 30   | 13   | 47    | 81.5 |
| 8408 | 36    | 31   | 28   | 99   | 27.5  | 35.5 | 18   | 55    | 64.5 |
| 8409 | 44    | 26.5 | 17   | 61   | 44    | 33   | 24   | 52.5  | 24   |
| 8410 | 17    | 18   | 8    | 15   | 11.5  | 26   | 9    | 13    | 10   |
| 8411 | 58    | 32   | 18   | 28   | 28    | 41   | 16   | 28    | 35   |

|      |      |      |      |       |      |      |      |      |      |
|------|------|------|------|-------|------|------|------|------|------|
| 8412 | 101  | 35   | 25   | 106.5 | 23   | 61   | 16   | 36   | 46   |
| 8413 | 28.5 | 29   | 15   | 86    | 24   | 29   | 10   | 26   | 30   |
| 8414 | 37   | 44   | 24   | 102   | 65.5 | 36   | 17   | 38   | 65.5 |
| 8415 | 40   | 28   | 24   | 100.5 | 22   | 33   | 13   | 43   | 46   |
| 8416 | 41   | 48.5 | 28   | 132   | 26   | 40   | 18   | 43.5 | 62   |
| 8417 | 56   | 21   | 15.5 | 69    | 26   | 29   | 13   | 26   | 23   |
| 8418 | 42   | 37.5 | 24   | 90    | 21   | 38   | 14   | 45   | 44.5 |
| 8419 | 36   | 30   | 22.5 | 88    | 27   | 31   | 16.5 | 34   | 24   |
| 8420 | 32.5 | 26.5 | 21   | 97    | 24   | 33   | 14   | 31   | 37   |
| 8421 | 36.5 | 49   | 26   | 94    | 28   | 39   | 19   | 50   | 49   |
| 8422 | 35.5 | 38   | 22   | 103   | 25.5 | 34   | 14   | 40   | 44   |
| 8423 | 37   | 28   | 18   | 101.5 | 20   | 32   | 12   | 34   | 32   |
| 8424 | 30   | 27.5 | 17   | 101   | 21   | 33   | 15   | 28   | 33   |
| 8425 | 46   | 53   | 30   | 133   | 36   | 46   | 28   | 57   | 48   |
| 8426 | 41   | 61   | 24   | 125.5 | 24   | 38   | 17   | 40   | 35   |
| 8427 | 33   | 28   | 19   | 89    | 21   | 30.5 | 13   | 31   | 37   |
| 8428 | 42   | 64   | 35.5 | 112   | 31   | 45   | 49   | 54   | 55   |
| 8429 | 38   | 38   | 22   | 84.5  | 24   | 37   | 18   | 34   | 40   |
| 8430 | 67   | 33   | 24   | 88.5  | 32   | 39   | 12   | 28   | 35   |
| 8431 | 106  | 41   | 20   | 86.5  | 35   | 73.5 | 16   | 29   | 50.5 |
| 8432 | 36   | 46   | 21   | 73    | 25   | 37.5 | 19   | 42   | 45   |
| 8433 | 42   | 43   | 24   | 105.5 | 28   | 37   | 21   | 48   | 49.5 |
| 8434 | 28   | 39   | 18   | 69.5  | 25   | 34   | 15   | 30   | 33   |
| 8435 | 27   | 32   | 23   | 78    | 21   | 31   | 13   | 30   | 37   |
| 8436 | 38   | 32   | 22   | 91    | 23.5 | 35   | 32   | 38   | 43   |
| 8437 | 51.5 | 26   | 20   | 103.5 | 36   | 30   | 18   | 37.5 | 34   |
| 8438 | 60   | 77   | 36   | 123   | 43   | 64   | 39   | 67   | 76.5 |
| 8439 | 65.5 | 66   | 27   | 97    | 35   | 64   | 20   | 47.5 | 56   |
| 8440 | 48   | 57   | 27   | 90    | 27.5 | 48.5 | 22   | 53   | 57   |
| 8441 | 37   | 42   | 26   | 80    | 26.5 | 37.5 | 20   | 37   | 41   |
| 8442 | 47   | 74   | 30   | 95    | 30   | 49.5 | 28   | 57   | 74   |
| 8443 | 55   | 61   | 31   | 82.5  | 29   | 54   | 26   | 57   | 60   |
| 8444 | 39   | 49   | 26   | 84.5  | 32   | 43   | 20   | 44   | 48   |
| 8445 | 93   | 38   | 23   | 76    | 27   | 33   | 15   | 40   | 38   |
| 8446 | 55.5 | 46   | 30   | 87    | 35   | 54   | 14   | 39   | 63   |
| 8447 | 37   | 48   | 21.5 | 86.5  | 26.5 | 42.5 | 15   | 40   | 47   |
| 8448 | 30   | 32   | 24   | 68    | 23.5 | 33   | 14   | 29   | 27   |
| 8449 | 37   | 51   | 27   | 71.5  | 33   | 42   | 25   | 45.5 | 47.5 |
| 8450 | 49.5 | 38   | 21   | 81    | 25   | 56.5 | 13   | 28   | 42   |
| 8451 | 29   | 20   | 16   | 62.5  | 25   | 30.5 | 12   | 29   | 24   |
| 8452 | 39.5 | 57   | 30   | 85    | 32   | 44   | 24   | 66   | 52   |
| 8453 | 76   | 45   | 28   | 100   | 35.5 | 78   | 19   | 47   | 69.5 |
| 8454 | 35   | 36   | 20   | 100   | 22.5 | 41   | 14   | 29   | 44   |
| 8455 | 27   | 27   | 15   | 63    | 24   | 29   | 11   | 32   | 43   |
| 8456 | 34   | 36   | 23   | 95    | 29   | 36   | 16   | 32   | 33   |
| 8457 | 29   | 33   | 17   | 70    | 27   | 34   | 14.5 | 25   | 37   |
| 8458 | 1353 | 106  | 40   | 105   | 47   | 620  | 31   | 72   | 115  |

|      |      |      |      |       |      |      |      |      |      |
|------|------|------|------|-------|------|------|------|------|------|
| 8459 | 23   | 26   | 17   | 90    | 28   | 29   | 10   | 24   | 33   |
| 8460 | 42   | 36   | 23   | 76    | 27   | 43   | 15   | 42   | 40   |
| 8461 | 41   | 32   | 22   | 80    | 27   | 39.5 | 13   | 29   | 38   |
| 8462 | 89   | 57   | 25   | 104.5 | 34   | 66   | 19   | 45   | 60   |
| 8463 | 42   | 51   | 29   | 101.5 | 36   | 47.5 | 21   | 56   | 51   |
| 8464 | 31.5 | 34   | 32   | 81.5  | 32   | 39   | 14   | 33   | 40   |
| 8465 | 27.5 | 23   | 14   | 57    | 18   | 30   | 9    | 21   | 37   |
| 8466 | 28   | 36   | 24.5 | 87    | 38.5 | 35   | 16   | 35   | 45   |
| 8467 | 44   | 51   | 31   | 87.5  | 36.5 | 49   | 24   | 44   | 52   |
| 8468 | 69   | 59.5 | 30   | 98.5  | 36   | 59.5 | 21   | 49   | 103  |
| 8469 | 63   | 75   | 40   | 85    | 34   | 73   | 26.5 | 67   | 80   |
| 8470 | 30   | 37   | 18   | 53    | 22.5 | 35   | 13   | 32   | 41.5 |
| 8471 | 32   | 35   | 22   | 84    | 26.5 | 37   | 16   | 33   | 31   |
| 8472 | 40   | 57   | 29   | 102   | 32   | 44   | 21   | 55   | 53   |
| 8473 | 36   | 44   | 22   | 83    | 20   | 39   | 16   | 43   | 54   |
| 8474 | 44.5 | 62   | 32   | 123   | 34   | 47   | 23   | 48.5 | 75   |
| 8475 | 47.5 | 58   | 30   | 89.5  | 34.5 | 51   | 27   | 60.5 | 86   |
| 8476 | 36   | 39.5 | 28   | 95    | 30   | 40   | 20   | 42   | 51   |
| 8477 | 35   | 45   | 56   | 90    | 27   | 38   | 18   | 39   | 61   |
| 8478 | 39   | 79   | 33   | 99    | 38   | 51   | 27   | 61   | 73   |
| 8479 | 29.5 | 37   | 23.5 | 65.5  | 38   | 37   | 11   | 30   | 31   |
| 8480 | 29.5 | 40   | 27   | 66    | 27   | 36   | 23   | 26.5 | 40   |
| 8481 | 34   | 41.5 | 24   | 111   | 25.5 | 42   | 18   | 34   | 37   |
| 8482 | 25   | 27.5 | 23   | 78    | 34   | 37   | 11   | 19   | 28   |
| 8483 | 47.5 | 37   | 25   | 67.5  | 24   | 37   | 18   | 32   | 58   |
| 8484 | 40   | 50   | 27   | 66    | 39.5 | 41.5 | 20   | 42   | 77   |
| 8485 | 58   | 25   | 14   | 51    | 26   | 28   | 11   | 17   | 16   |
| 8486 | 23   | 28.5 | 13   | 58.5  | 21   | 33   | 9    | 15   | 16.5 |
| 8487 | 34.5 | 26   | 16   | 56    | 20   | 32   | 11   | 15   | 16   |
| 8488 | 25.5 | 27   | 14   | 44    | 26.5 | 29   | 12   | 16   | 18   |
| 8489 | 25   | 27   | 13   | 55    | 32   | 31   | 8    | 15   | 18   |
| 8490 | 27   | 25.5 | 15   | 84    | 30   | 34   | 8    | 18   | 27   |
| 8491 | 27   | 25   | 17   | 66    | 22   | 28   | 10   | 20   | 19   |
| 8492 | 29   | 29   | 17   | 63.5  | 23   | 33.5 | 10   | 19   | 21   |
| 8493 | 29   | 24   | 13   | 62.5  | 21   | 27   | 9    | 21   | 17   |
| 8494 | 24   | 24   | 11   | 61    | 53   | 27.5 | 8    | 15   | 17   |
| 8495 | 26   | 25   | 32   | 91    | 32   | 31.5 | 13   | 43   | 36   |
| 8496 | 31   | 27.5 | 15.5 | 42    | 31.5 | 30.5 | 16   | 68.5 | 21   |
| 8497 | 69   | 25   | 14   | 48    | 40   | 28   | 20   | 145  | 19   |
| 8498 | 33   | 25   | 17.5 | 75    | 30.5 | 35   | 12   | 23   | 21   |
| 8499 | 29   | 26   | 18.5 | 83.5  | 22   | 27   | 12   | 28   | 17   |
| 8500 | 31   | 25   | 20   | 90.5  | 19   | 30   | 13   | 28   | 18.5 |
| 8501 | 29   | 25   | 16   | 100   | 29   | 28   | 21   | 24   | 20   |
| 8502 | 27.5 | 24   | 15   | 74.5  | 33.5 | 28   | 13   | 21   | 16   |
| 8503 | 23   | 22   | 19   | 51    | 86.5 | 27   | 8    | 17   | 16   |
| 8504 | 23   | 22   | 9    | 68    | 36   | 27   | 8    | 14   | 15   |
| 8505 | 27   | 23   | 13   | 74.5  | 23   | 31   | 13.5 | 36   | 17   |

|      |      |      |      |       |      |      |      |      |      |
|------|------|------|------|-------|------|------|------|------|------|
| 8506 | 23.5 | 21   | 14   | 38.5  | 19   | 27   | 10   | 20   | 17   |
| 8507 | 17   | 22   | 10   | 28    | 16.5 | 28.5 | 6    | 11   | 14   |
| 8508 | 36   | 30   | 14   | 66    | 48   | 32   | 11   | 17   | 22   |
| 8509 | 143  | 29   | 50   | 62    | 37   | 41   | 23   | 32   | 48   |
| 8510 | 37   | 26.5 | 21.5 | 142   | 41   | 31   | 12   | 52   | 40   |
| 8511 | 42   | 36   | 20   | 78    | 27   | 49   | 15   | 29.5 | 37   |
| 8512 | 27.5 | 28   | 17   | 61    | 27   | 30   | 11   | 29.5 | 32   |
| 8513 | 30   | 32   | 17   | 72    | 24   | 35   | 16   | 40   | 30   |
| 8514 | 39   | 30   | 19   | 73    | 27   | 36.5 | 10   | 29   | 25   |
| 8515 | 32.5 | 55   | 23.5 | 89    | 25   | 40   | 20   | 43   | 47   |
| 8516 | 40.5 | 34.5 | 19   | 97    | 26.5 | 44   | 13   | 28   | 31.5 |
| 8517 | 33   | 34   | 25   | 78    | 29.5 | 34   | 34   | 35   | 46   |
| 8518 | 32   | 33   | 22   | 99    | 25   | 36   | 13   | 32   | 29   |
| 8519 | 28   | 21.5 | 14   | 63    | 20   | 27   | 8    | 17.5 | 19   |
| 8520 | 32.5 | 37   | 22   | 83    | 28   | 36   | 17   | 43   | 41   |
| 8521 | 39   | 47   | 25   | 68    | 31   | 41   | 20.5 | 47   | 43   |
| 8522 | 50   | 37   | 20   | 84    | 24   | 35   | 12.5 | 36   | 54   |
| 8523 | 30.5 | 46   | 24   | 76.5  | 23   | 36.5 | 17   | 37   | 38   |
| 8524 | 43   | 49   | 24   | 91.5  | 31   | 42   | 23   | 44   | 50   |
| 8525 | 39   | 38   | 21   | 68    | 26   | 44   | 16   | 37   | 36   |
| 8526 | 41   | 50.5 | 37   | 100.5 | 32   | 49   | 25   | 46.5 | 50   |
| 8527 | 43.5 | 39   | 35   | 69.5  | 26.5 | 34   | 19   | 40.5 | 36.5 |
| 8528 | 29   | 39   | 22   | 80    | 23   | 33.5 | 18   | 34   | 40   |
| 8529 | 49   | 47   | 28   | 103.5 | 76.5 | 39   | 18   | 55   | 44   |
| 8530 | 31   | 42   | 21.5 | 94    | 27   | 37   | 17   | 42   | 56   |
| 8531 | 25   | 36   | 18.5 | 62    | 30   | 33   | 13.5 | 27   | 41   |
| 8532 | 34.5 | 31   | 16   | 75.5  | 22.5 | 31   | 13.5 | 26   | 42   |
| 8533 | 26   | 36   | 18   | 84    | 29   | 31   | 15   | 35   | 43.5 |
| 8534 | 36.5 | 26   | 19   | 75    | 39   | 28   | 12   | 23.5 | 28   |
| 8535 | 92   | 36   | 28   | 79.5  | 28   | 37.5 | 18   | 39   | 32   |
| 8536 | 75.5 | 45   | 22   | 77    | 24   | 37   | 17   | 34   | 65   |
| 8537 | 40   | 54   | 31   | 87    | 46   | 37   | 22   | 60   | 59   |
| 8538 | 30   | 37   | 23   | 82    | 28   | 34   | 14   | 33.5 | 39   |
| 8539 | 27   | 25   | 15   | 67.5  | 25   | 30   | 13   | 26   | 41.5 |
| 8540 | 34   | 54   | 28   | 83.5  | 31   | 39.5 | 24   | 51   | 61   |
| 8541 | 44   | 60   | 31   | 87    | 32.5 | 44   | 23.5 | 60.5 | 65.5 |
| 8542 | 33   | 31   | 19   | 72    | 24   | 29   | 13   | 24   | 36   |
| 8543 | 352  | 29   | 21.5 | 68.5  | 28.5 | 69   | 12   | 23.5 | 47   |
| 8544 | 37   | 48   | 27   | 102   | 37.5 | 37   | 17   | 44   | 55   |
| 8545 | 36   | 54   | 30   | 82    | 28   | 41   | 22   | 49   | 61   |
| 8546 | 28   | 38   | 21   | 75.5  | 32   | 29.5 | 13   | 32   | 45   |
| 8547 | 30   | 34   | 21   | 59    | 26   | 25   | 16   | 34   | 32   |
| 8548 | 25   | 35   | 18   | 67.5  | 22   | 32   | 15   | 31   | 42   |
| 8549 | 57.5 | 46   | 25   | 104   | 26   | 41.5 | 19   | 48   | 49   |
| 8550 | 28   | 41   | 20.5 | 71    | 28   | 34   | 17   | 35.5 | 39   |
| 8551 | 31   | 32   | 19   | 56    | 18.5 | 37   | 13   | 27.5 | 34   |
| 8552 | 27   | 32   | 25   | 91    | 24.5 | 32   | 18   | 31   | 37   |



|      |       |       |      |       |      |       |      |      |       |
|------|-------|-------|------|-------|------|-------|------|------|-------|
| 8553 | 31    | 48    | 22   | 94.5  | 27   | 38    | 17   | 44   | 50    |
| 8554 | 31    | 38    | 19   | 79    | 29   | 36    | 16   | 31   | 46    |
| 8555 | 15    | 19    | 9    | 45    | 13   | 21    | 7    | 12   | 11    |
| 8556 | 19    | 18    | 13   | 53    | 25   | 22    | 7    | 15   | 11    |
| 8557 | 25    | 16    | 12   | 77    | 20   | 22    | 12   | 39   | 11    |
| 8558 | 19    | 18    | 11   | 58    | 19   | 22    | 9    | 16   | 13    |
| 8559 | 22    | 21    | 14   | 48    | 17   | 24.5  | 9    | 17   | 12    |
| 8560 | 29    | 19    | 14   | 46    | 20   | 22.5  | 11   | 23   | 15    |
| 8561 | 20    | 19.5  | 10   | 33    | 20.5 | 22.5  | 11   | 24   | 14    |
| 8562 | 26    | 27    | 13   | 50    | 147  | 19    | 13   | 49.5 | 65    |
| 8563 | 61    | 25    | 21.5 | 34    | 28   | 29    | 16   | 81   | 20    |
| 8564 | 50    | 24    | 28   | 112   | 38.5 | 42    | 14   | 53.5 | 46.5  |
| 8565 | 32.5  | 21    | 12   | 59    | 23   | 21    | 19   | 26.5 | 37.5  |
| 8566 | 29    | 18    | 11   | 40    | 32   | 21    | 10   | 17   | 12    |
| 8567 | 28    | 20    | 11   | 31    | 28.5 | 27    | 14   | 26   | 17    |
| 8568 | 23    | 22    | 22   | 111   | 23   | 26    | 61   | 26   | 150   |
| 8569 | 33    | 20.5  | 30   | 75    | 27.5 | 26    | 23   | 24   | 28.5  |
| 8570 | 18    | 18    | 10   | 27.5  | 30   | 24    | 12   | 16   | 13    |
| 8571 | 43    | 28    | 19   | 112   | 32.5 | 36    | 18   | 36   | 25    |
| 8572 | 78    | 35.5  | 23   | 114.5 | 39.5 | 48    | 16   | 44   | 37    |
| 8573 | 65    | 46    | 22   | 86    | 37   | 75.5  | 13   | 21   | 48    |
| 8574 | 71    | 51    | 25.5 | 99    | 32   | 72.5  | 17   | 34   | 44    |
| 8575 | 79    | 73    | 38   | 203   | 43   | 100   | 26.5 | 52   | 98.5  |
| 8576 | 72    | 59    | 30.5 | 119   | 41   | 74.5  | 31   | 48   | 83.5  |
| 8577 | 70    | 49.5  | 24   | 108   | 27   | 77.5  | 15   | 28   | 40    |
| 8578 | 62    | 56    | 33   | 98    | 33.5 | 58.5  | 21   | 40   | 52    |
| 8579 | 60    | 37.5  | 23   | 86    | 71   | 67    | 13   | 23.5 | 62    |
| 8580 | 63.5  | 46    | 26   | 102   | 45   | 64    | 20   | 49   | 100.5 |
| 8581 | 57    | 41    | 23   | 98    | 37   | 64    | 14   | 29   | 34    |
| 8582 | 215.5 | 66    | 33   | 112   | 43.5 | 79    | 23.5 | 49   | 107   |
| 8583 | 160.5 | 66    | 30.5 | 148   | 29   | 169.5 | 18.5 | 38   | 56.5  |
| 8584 | 74    | 60    | 30   | 87    | 40   | 70    | 21   | 43   | 50    |
| 8585 | 73    | 38.5  | 21.5 | 88    | 34   | 59    | 12.5 | 22   | 48    |
| 8586 | 79    | 58    | 32   | 106.5 | 38   | 65    | 19.5 | 47   | 75    |
| 8587 | 141   | 92    | 45   | 109   | 45   | 88    | 35   | 68   | 85    |
| 8588 | 78    | 42    | 25.5 | 170   | 23   | 59    | 13   | 31   | 46.5  |
| 8589 | 66.5  | 58    | 34   | 101   | 43   | 67.5  | 22   | 40   | 100   |
| 8590 | 77    | 58    | 27   | 126   | 31   | 73    | 28   | 44   | 88    |
| 8591 | 76    | 55    | 33   | 181   | 39   | 67.5  | 22   | 49   | 46    |
| 8592 | 59    | 46    | 24   | 91    | 38.5 | 62    | 15   | 31   | 40    |
| 8593 | 73.5  | 56.5  | 28.5 | 125   | 35   | 55.5  | 20.5 | 62   | 74.5  |
| 8594 | 61    | 58    | 31   | 93.5  | 32   | 66    | 20   | 41   | 63    |
| 8595 | 112.5 | 38.5  | 27   | 103   | 24   | 60    | 15   | 36   | 62    |
| 8596 | 61.5  | 38    | 20   | 68    | 28   | 75.5  | 11   | 22   | 37.5  |
| 8597 | 64.5  | 39    | 21   | 72    | 27   | 55    | 13   | 26   | 56    |
| 8598 | 84    | 45.5  | 27   | 120   | 26   | 72    | 18   | 37.5 | 74    |
| 8599 | 172   | 126.5 | 122  | 146   | 135  | 181.5 | 138  | 98   | 134   |

|      |       |      |      |       |       |      |      |      |      |
|------|-------|------|------|-------|-------|------|------|------|------|
| 8600 | 62    | 35.5 | 21   | 111   | 57.5  | 73.5 | 12   | 24   | 66   |
| 8601 | 56    | 44   | 22   | 103   | 28    | 52.5 | 17   | 58   | 39   |
| 8602 | 69    | 42   | 22   | 112   | 24    | 67   | 14   | 31   | 61   |
| 8603 | 120   | 55   | 31   | 101   | 53    | 69   | 19   | 44   | 80   |
| 8604 | 371   | 81   | 32   | 166   | 25    | 355  | 18   | 29   | 74.5 |
| 8605 | 59    | 74   | 34   | 107   | 34    | 72   | 25.5 | 119  | 84   |
| 8606 | 56    | 55   | 31   | 129   | 33    | 60   | 22   | 42   | 51   |
| 8607 | 53    | 47   | 27   | 90    | 32.5  | 54   | 16   | 48   | 41   |
| 8608 | 75.5  | 56   | 29.5 | 99.5  | 31.5  | 62   | 19   | 41   | 65   |
| 8609 | 69.5  | 70   | 34   | 150.5 | 29.5  | 73   | 25   | 76   | 83   |
| 8610 | 61.5  | 30   | 17   | 77.5  | 43    | 49   | 15   | 29   | 34.5 |
| 8611 | 43    | 28.5 | 13   | 58    | 22    | 46   | 7    | 15   | 23   |
| 8612 | 37    | 34.5 | 22   | 92    | 22    | 42   | 14   | 21   | 20   |
| 8613 | 43    | 33   | 16   | 80    | 161   | 55   | 11   | 50   | 24.5 |
| 8614 | 81    | 27   | 35   | 52    | 66    | 45   | 12   | 20   | 26   |
| 8615 | 42.5  | 28   | 14   | 61.5  | 22    | 51   | 10   | 19   | 48   |
| 8616 | 44    | 29   | 12   | 65    | 22    | 48   | 10   | 18   | 23   |
| 8617 | 43    | 30   | 18   | 97    | 21    | 43   | 10   | 21   | 39   |
| 8618 | 61.5  | 31   | 12   | 39.5  | 19    | 47   | 9    | 16   | 21   |
| 8619 | 74.5  | 35   | 24   | 190   | 36    | 62   | 32   | 50   | 27   |
| 8620 | 50.5  | 32   | 14   | 58    | 22    | 52   | 11   | 23   | 42   |
| 8621 | 85    | 59   | 45   | 134   | 52.5  | 61   | 21.5 | 49   | 73   |
| 8622 | 74.5  | 94   | 59.5 | 171   | 148   | 68   | 25   | 62   | 74.5 |
| 8623 | 98    | 41   | 25   | 119   | 29    | 57   | 16   | 39   | 37   |
| 8624 | 53    | 29.5 | 25   | 102   | 26.5  | 51   | 10   | 21.5 | 44   |
| 8625 | 66    | 48   | 29   | 101   | 37.5  | 58.5 | 14   | 35   | 63   |
| 8626 | 56.5  | 34   | 23   | 125.5 | 233   | 54   | 12   | 31.5 | 49   |
| 8627 | 66    | 50   | 30   | 119   | 41.5  | 61   | 18   | 45   | 64   |
| 8628 | 58    | 40   | 21   | 97    | 20    | 60   | 12   | 28   | 40   |
| 8629 | 68    | 47   | 22   | 108.5 | 28    | 62   | 24   | 37   | 49   |
| 8630 | 45    | 34   | 27   | 107   | 29    | 53   | 10   | 24   | 37   |
| 8631 | 53.5  | 33   | 24   | 124   | 29    | 51   | 13   | 29   | 32   |
| 8632 | 56    | 30   | 25   | 160.5 | 19    | 48   | 14   | 30   | 47   |
| 8633 | 64    | 52   | 29.5 | 121   | 32    | 55   | 19.5 | 44   | 107  |
| 8634 | 58    | 30   | 19   | 86    | 28    | 54   | 11   | 25   | 38   |
| 8635 | 59.5  | 48   | 27   | 116   | 40    | 58   | 17   | 45   | 44   |
| 8636 | 57    | 28   | 20   | 138   | 33.5  | 48   | 11   | 51.5 | 38   |
| 8637 | 40.5  | 28   | 11   | 26    | 19    | 48   | 8    | 18   | 16   |
| 8638 | 44    | 29.5 | 13.5 | 68    | 39.5  | 51   | 9    | 17   | 24.5 |
| 8639 | 41    | 27   | 12   | 58    | 154.5 | 42   | 10   | 18   | 18   |
| 8640 | 43    | 27   | 17   | 71    | 17.5  | 47   | 10.5 | 19   | 21.5 |
| 8641 | 63    | 34   | 21   | 135.5 | 22    | 56   | 11   | 34.5 | 35   |
| 8642 | 55    | 27   | 579  | 39    | 49    | 42   | 12   | 24   | 20   |
| 8643 | 104.5 | 27   | 21   | 86    | 31    | 46   | 34   | 27   | 26   |
| 8644 | 50    | 26   | 17   | 43    | 31    | 38   | 15   | 69   | 21   |
| 8645 | 49.5  | 29   | 16   | 37    | 129   | 46.5 | 19   | 21   | 24   |
| 8646 | 68.5  | 27.5 | 35   | 72    | 46    | 46   | 23   | 29   | 33   |

|      |      |      |      |       |       |      |      |       |       |
|------|------|------|------|-------|-------|------|------|-------|-------|
| 8647 | 55   | 32   | 22   | 62    | 46    | 52   | 13   | 45    | 52    |
| 8648 | 49.5 | 28   | 18   | 158.5 | 28.5  | 45   | 13   | 29.5  | 22    |
| 8649 | 57   | 49   | 23   | 88.5  | 21.5  | 50   | 17   | 40    | 73    |
| 8650 | 46   | 27   | 33   | 93.5  | 32.5  | 44   | 13   | 48    | 166.5 |
| 8651 | 111  | 40.5 | 25.5 | 92.5  | 20.5  | 46   | 16   | 35    | 46    |
| 8652 | 73   | 25   | 16   | 55.5  | 16    | 57   | 10   | 20    | 40    |
| 8653 | 38   | 32   | 20.5 | 81    | 18    | 46   | 10   | 21    | 177   |
| 8654 | 41   | 25   | 42   | 103   | 28.5  | 38.5 | 17   | 23    | 35.5  |
| 8655 | 40.5 | 23   | 23   | 82    | 114   | 41   | 125  | 23    | 38    |
| 8656 | 56.5 | 27   | 21   | 129.5 | 102.5 | 52   | 28   | 25    | 45.5  |
| 8657 | 45   | 45   | 18   | 45    | 22.5  | 37   | 11   | 27    | 23    |
| 8658 | 97.5 | 25   | 13   | 65.5  | 152   | 41   | 12   | 107.5 | 31    |
| 8659 | 59   | 27   | 17   | 57    | 27    | 47   | 13   | 20    | 25    |
| 8660 | 49   | 27   | 18   | 84.5  | 36    | 42   | 12   | 26    | 62    |
| 8661 | 34   | 18   | 11   | 38.5  | 16.5  | 38   | 9    | 16    | 16.5  |
| 8662 | 31.5 | 27   | 16   | 23    | 13    | 41   | 9    | 13    | 17.5  |
| 8663 | 54   | 27   | 23   | 98.5  | 23    | 47   | 11   | 30    | 21    |
| 8664 | 41   | 22   | 14.5 | 94    | 16    | 35   | 9    | 23    | 15    |
| 8665 | 29   | 22   | 7    | 15    | 8     | 35   | 7    | 12    | 14    |
| 8666 | 34   | 21.5 | 9    | 35    | 38    | 38   | 8    | 17.5  | 16    |
| 8667 | 49   | 24   | 13   | 52    | 57.5  | 46   | 11   | 19    | 21    |
| 8668 | 32.5 | 23   | 12   | 33    | 17    | 35.5 | 15   | 23    | 18.5  |
| 8669 | 40   | 29   | 13   | 54    | 24    | 44.5 | 23   | 58    | 40    |
| 8670 | 37   | 21.5 | 14   | 50    | 16    | 38.5 | 10   | 25.5  | 30    |
| 8671 | 44   | 27   | 15   | 47.5  | 27    | 41   | 10   | 18.5  | 20    |
| 8672 | 38.5 | 24.5 | 14   | 46.5  | 20    | 44   | 11   | 23.5  | 26    |
| 8673 | 60   | 29   | 31.5 | 71    | 841.5 | 42.5 | 16   | 57    | 53    |
| 8674 | 86   | 29   | 22   | 110.5 | 44    | 41   | 23   | 29    | 96.5  |
| 8675 | 57.5 | 27   | 28   | 82.5  | 39    | 45   | 21   | 39    | 27    |
| 8676 | 27   | 23   | 8    | 36.5  | 15.5  | 41.5 | 8    | 13    | 15    |
| 8677 | 40   | 26   | 16   | 76    | 25    | 37   | 11   | 23    | 24    |
| 8678 | 54   | 41.5 | 25.5 | 102   | 41    | 53   | 18   | 37    | 61    |
| 8679 | 63   | 84.5 | 38   | 169   | 55.5  | 59   | 35   | 74    | 105   |
| 8680 | 43   | 25   | 17   | 62    | 25.5  | 41   | 11   | 21.5  | 55.5  |
| 8681 | 53   | 24   | 27   | 73    | 26    | 36   | 11   | 24    | 31    |
| 8682 | 62   | 79   | 36   | 137   | 33.5  | 69   | 32   | 67    | 79    |
| 8683 | 56   | 44   | 28   | 97.5  | 29    | 54   | 18.5 | 53    | 61.5  |
| 8684 | 65   | 53   | 27   | 84.5  | 57    | 54.5 | 19   | 47.5  | 65    |
| 8685 | 64   | 47   | 28   | 156   | 48    | 58   | 17   | 46    | 54    |
| 8686 | 35   | 24   | 17   | 61.5  | 19    | 37   | 12   | 24    | 28.5  |
| 8687 | 54   | 37   | 21   | 94    | 25    | 46   | 15.5 | 32    | 51.5  |
| 8688 | 40   | 52.5 | 18   | 71    | 22.5  | 35   | 12   | 37    | 27    |
| 8689 | 49.5 | 24   | 21   | 102   | 26    | 42.5 | 60   | 25    | 33    |
| 8690 | 45   | 24   | 21   | 117   | 40    | 40.5 | 12   | 33    | 21.5  |
| 8691 | 56   | 31   | 24   | 118   | 29    | 43   | 16   | 36    | 40    |
| 8692 | 45   | 28   | 26   | 80.5  | 27    | 48   | 11   | 61    | 38    |
| 8693 | 44.5 | 28   | 24   | 113   | 35    | 42.5 | 12   | 45    | 39    |

|      |      |      |      |       |       |      |      |      |      |
|------|------|------|------|-------|-------|------|------|------|------|
| 8694 | 48   | 25   | 19   | 84    | 63    | 40   | 10.5 | 22   | 30   |
| 8695 | 50   | 33   | 20.5 | 111   | 26    | 49   | 13   | 33.5 | 43   |
| 8696 | 59   | 72   | 28   | 100   | 32    | 57.5 | 24   | 69   | 66   |
| 8697 | 47   | 31   | 19   | 142.5 | 23    | 52   | 11   | 27   | 46   |
| 8698 | 57.5 | 38   | 25   | 99    | 33    | 47   | 16   | 44.5 | 38   |
| 8699 | 48   | 48.5 | 35.5 | 109   | 27    | 48   | 19   | 40   | 53   |
| 8700 | 46   | 30   | 20   | 100   | 41    | 41   | 20   | 30   | 43   |
| 8701 | 59.5 | 49   | 26   | 87.5  | 89    | 50   | 15   | 41   | 63   |
| 8702 | 62   | 23   | 18   | 77    | 33    | 54.5 | 12   | 26   | 34.5 |
| 8703 | 66   | 29   | 19   | 77    | 27.5  | 58   | 14   | 23   | 48   |
| 8704 | 51.5 | 37   | 22   | 92    | 44    | 48   | 18   | 34   | 39.5 |
| 8705 | 48   | 25   | 16   | 114   | 25    | 42   | 9    | 26   | 51   |
| 8706 | 46   | 42   | 23   | 96.5  | 32.5  | 43   | 15   | 35   | 107  |
| 8707 | 310  | 37   | 24   | 88    | 30    | 49   | 17   | 36   | 54   |
| 8708 | 49   | 27   | 15   | 89    | 25.5  | 46   | 12.5 | 26   | 45   |
| 8709 | 60   | 26   | 18   | 86.5  | 44    | 42   | 15   | 25   | 31   |
| 8710 | 46.5 | 26   | 20   | 70    | 24    | 38   | 14   | 23   | 49   |
| 8711 | 50   | 25.5 | 17   | 88    | 28.5  | 45   | 13   | 25   | 51   |
| 8712 | 60   | 33.5 | 23   | 117   | 26    | 45   | 14   | 45   | 54   |
| 8713 | 49   | 24.5 | 18   | 84    | 31    | 45.5 | 11   | 22   | 24   |
| 8714 | 47   | 26   | 20   | 99.5  | 28.5  | 41   | 14   | 26   | 38.5 |
| 8715 | 46   | 38   | 23   | 88    | 28    | 44   | 17   | 55   | 122  |
| 8716 | 60   | 44   | 27.5 | 113   | 40    | 52   | 19.5 | 50   | 63   |
| 8717 | 51   | 33.5 | 19   | 78.5  | 52.5  | 43   | 13   | 34.5 | 48.5 |
| 8718 | 53.5 | 48   | 33   | 90    | 31    | 57.5 | 23   | 47   | 79   |
| 8719 | 61   | 22   | 21   | 99    | 20    | 37   | 10.5 | 31   | 28   |
| 8720 | 54   | 37   | 24   | 88    | 29    | 41.5 | 18   | 35   | 72   |
| 8721 | 47.5 | 24.5 | 23   | 81.5  | 23    | 43   | 13   | 41   | 26   |
| 8722 | 45   | 39.5 | 27.5 | 98.5  | 37    | 51.5 | 16   | 34   | 46   |
| 8723 | 55   | 52   | 29   | 105   | 36    | 52.5 | 26   | 49   | 84   |
| 8724 | 61   | 30   | 24   | 104   | 31    | 44   | 17   | 35   | 65.5 |
| 8725 | 44   | 32   | 22   | 80    | 20    | 44   | 13   | 26   | 52   |
| 8726 | 57   | 51   | 32   | 91    | 37    | 59   | 24   | 54   | 66   |
| 8727 | 58   | 40.5 | 26   | 84    | 31    | 45   | 19   | 39   | 67   |
| 8728 | 60   | 53   | 31   | 96    | 29    | 52.5 | 22   | 45   | 60   |
| 8729 | 43   | 47   | 22.5 | 68    | 34    | 56   | 15   | 34   | 51   |
| 8730 | 68   | 58   | 32   | 120   | 33    | 85   | 20   | 45   | 65.5 |
| 8731 | 46.5 | 45.5 | 26   | 95    | 47    | 52   | 15   | 45   | 66   |
| 8732 | 62.5 | 87   | 43.5 | 148   | 47.5  | 77.5 | 33   | 66   | 90   |
| 8733 | 31.5 | 38   | 15.5 | 69    | 23    | 47.5 | 8    | 14   | 24   |
| 8734 | 68   | 45   | 53.5 | 52.5  | 111   | 56.5 | 22   | 46   | 45   |
| 8735 | 35   | 35.5 | 19   | 40.5  | 40    | 46   | 11   | 17   | 32   |
| 8736 | 45   | 45   | 25   | 100   | 37    | 62   | 15   | 26   | 84   |
| 8737 | 54   | 41   | 27   | 101   | 59    | 57.5 | 47   | 35   | 37   |
| 8738 | 30   | 36   | 16   | 41    | 110.5 | 47   | 13   | 19   | 47   |
| 8739 | 36   | 33   | 16   | 57    | 39    | 39   | 11   | 20   | 38   |
| 8740 | 32   | 35   | 26   | 67.5  | 35    | 50   | 10   | 22   | 42   |

|      |       |      |      |       |      |      |      |      |      |
|------|-------|------|------|-------|------|------|------|------|------|
| 8741 | 30    | 36   | 20   | 55    | 29   | 49   | 10   | 17   | 51   |
| 8742 | 44    | 36   | 25   | 52.5  | 36   | 53   | 11   | 20.5 | 63   |
| 8743 | 37.5  | 40   | 22   | 49    | 44   | 55   | 16   | 19   | 77   |
| 8744 | 30    | 38   | 16   | 57    | 24.5 | 52   | 10   | 16   | 43   |
| 8745 | 41    | 38   | 24   | 90.5  | 28.5 | 52   | 11   | 20   | 44   |
| 8746 | 55    | 33   | 15   | 68    | 45   | 48   | 10.5 | 20   | 27   |
| 8747 | 31    | 36   | 17   | 109.5 | 28   | 44   | 10   | 20   | 38   |
| 8748 | 33.5  | 37   | 14   | 49.5  | 40   | 49   | 11   | 28   | 23   |
| 8749 | 29    | 41   | 17   | 51    | 96   | 45.5 | 13.5 | 60   | 52   |
| 8750 | 43    | 37   | 17.5 | 79.5  | 32   | 48   | 14   | 35   | 24   |
| 8751 | 40    | 36   | 16   | 55    | 39   | 47   | 14   | 27   | 50   |
| 8752 | 42.5  | 37   | 17   | 51    | 30   | 47.5 | 13   | 17   | 24   |
| 8753 | 39    | 37   | 22   | 112   | 70   | 46   | 12   | 19   | 31   |
| 8754 | 45    | 30.5 | 13   | 44    | 26   | 41   | 9    | 18   | 25   |
| 8755 | 32    | 38   | 23   | 77    | 29.5 | 42   | 16   | 36   | 36   |
| 8756 | 51    | 57   | 29   | 101   | 92   | 58   | 25   | 49   | 58   |
| 8757 | 39    | 36.5 | 25   | 81    | 35   | 49   | 14   | 26   | 51   |
| 8758 | 37    | 47   | 28   | 95    | 42   | 53   | 20   | 34.5 | 54   |
| 8759 | 39.5  | 33   | 19   | 93    | 44.5 | 48   | 14   | 27   | 30   |
| 8760 | 54    | 50   | 24   | 79    | 38.5 | 69.5 | 17   | 35   | 58   |
| 8761 | 63    | 50   | 20   | 101   | 43   | 76   | 14   | 28   | 42   |
| 8762 | 52    | 61   | 26   | 80    | 28.5 | 72   | 18   | 38   | 47   |
| 8763 | 68    | 70   | 45   | 113   | 64.5 | 61   | 33   | 81   | 76   |
| 8764 | 48    | 49   | 27   | 104   | 37   | 55   | 17   | 34   | 51   |
| 8765 | 48    | 44   | 24   | 88    | 36   | 55.5 | 16   | 32   | 47   |
| 8766 | 41    | 50.5 | 24   | 90    | 30.5 | 56   | 18   | 35   | 63   |
| 8767 | 33.5  | 35   | 21   | 70    | 30   | 42   | 16   | 23   | 25   |
| 8768 | 52.5  | 45   | 24   | 74    | 32   | 54   | 15   | 30   | 44.5 |
| 8769 | 38.5  | 56   | 23   | 76    | 50   | 55   | 20   | 37   | 45   |
| 8770 | 36    | 39   | 22   | 81    | 24   | 45   | 12   | 29   | 34   |
| 8771 | 38    | 31   | 23   | 61.5  | 27   | 40   | 15   | 28   | 29   |
| 8772 | 42    | 51   | 26.5 | 98    | 33   | 52   | 21   | 37   | 53   |
| 8773 | 103.5 | 86   | 38   | 102   | 43   | 102  | 29   | 176  | 90   |
| 8774 | 45    | 63   | 34   | 113   | 41   | 57   | 23   | 52   | 71.5 |
| 8775 | 37.5  | 41   | 19   | 70    | 26   | 48   | 13.5 | 29.5 | 39   |
| 8776 | 43    | 52.5 | 24   | 85    | 31   | 59   | 19   | 39   | 44   |
| 8777 | 37    | 52   | 22   | 71    | 36   | 51   | 19   | 37   | 52   |
| 8778 | 68    | 56   | 31   | 95    | 74   | 61   | 19   | 42.5 | 89   |
| 8779 | 40.5  | 36   | 17   | 64    | 33   | 47   | 14   | 31   | 26   |
| 8780 | 52    | 63.5 | 40   | 96    | 44.5 | 62   | 32   | 55   | 63   |
| 8781 | 142   | 32   | 19   | 82    | 38   | 71   | 15   | 22   | 49   |
| 8782 | 28    | 29   | 17   | 79.5  | 22   | 39   | 15   | 20   | 24   |
| 8783 | 34    | 39   | 19   | 82    | 32   | 48   | 16   | 26   | 42   |
| 8784 | 49.5  | 32   | 18   | 45    | 39   | 46   | 12   | 56   | 41   |
| 8785 | 44    | 32   | 20   | 94.5  | 31.5 | 45   | 13   | 20   | 36   |
| 8786 | 50    | 33   | 20   | 48    | 44.5 | 60   | 13   | 24   | 38.5 |
| 8787 | 28    | 28   | 15   | 66    | 28.5 | 37   | 9    | 16   | 20   |

|      |      |      |      |       |       |      |      |      |       |
|------|------|------|------|-------|-------|------|------|------|-------|
| 8788 | 34   | 32   | 15   | 56    | 26    | 44   | 9    | 43   | 19    |
| 8789 | 38   | 34   | 18   | 63    | 34    | 49   | 15   | 36   | 31    |
| 8790 | 35   | 30   | 24   | 92    | 59.5  | 40   | 28   | 18   | 21    |
| 8791 | 29   | 27   | 15   | 54    | 348.5 | 41   | 17   | 16   | 67    |
| 8792 | 35.5 | 29   | 27   | 48    | 36    | 41   | 22   | 26   | 74    |
| 8793 | 40   | 27   | 288  | 46    | 31    | 41.5 | 14   | 18   | 59    |
| 8794 | 29   | 28   | 20   | 54.5  | 29    | 40   | 18   | 17   | 21    |
| 8795 | 98   | 31   | 16   | 43    | 29    | 41.5 | 22   | 14   | 24.5  |
| 8796 | 35   | 28   | 22   | 63    | 29    | 41   | 12.5 | 17   | 24.5  |
| 8797 | 32.5 | 29.5 | 28   | 64    | 32    | 39.5 | 12   | 15   | 25    |
| 8798 | 30   | 29   | 18   | 50    | 30    | 42   | 38   | 17   | 30    |
| 8799 | 35   | 30   | 24   | 50    | 30    | 50   | 17   | 21   | 35    |
| 8800 | 34.5 | 31.5 | 26   | 107.5 | 38    | 42   | 16   | 23   | 22    |
| 8801 | 39.5 | 29   | 13   | 43.5  | 27.5  | 42   | 15   | 20   | 20    |
| 8802 | 43   | 30   | 24   | 60    | 35    | 49   | 12   | 18   | 27    |
| 8803 | 62   | 30   | 23   | 59    | 32    | 43   | 19   | 33   | 39    |
| 8804 | 33   | 29   | 16   | 63    | 32.5  | 45   | 13.5 | 17   | 24    |
| 8805 | 40.5 | 39   | 20   | 45    | 120.5 | 60   | 16   | 17.5 | 29    |
| 8806 | 44   | 35   | 22   | 77.5  | 35    | 43   | 16   | 30   | 40    |
| 8807 | 40.5 | 29   | 17   | 46.5  | 29    | 36   | 9    | 18   | 33    |
| 8808 | 67   | 72.5 | 41   | 80    | 59    | 59.5 | 25   | 55   | 79    |
| 8809 | 59   | 44   | 26   | 73    | 35    | 57   | 19   | 35   | 50    |
| 8810 | 45   | 69   | 36   | 86    | 51.5  | 58   | 30   | 57   | 72.5  |
| 8811 | 51   | 58   | 28   | 88.5  | 35.5  | 61   | 20.5 | 46   | 61.5  |
| 8812 | 76   | 67   | 34   | 94    | 51    | 74.5 | 23   | 59   | 91.5  |
| 8813 | 52.5 | 34   | 20   | 82    | 31.5  | 46   | 16   | 33   | 44    |
| 8814 | 42   | 38   | 24   | 109   | 43    | 38   | 53   | 60   | 55    |
| 8815 | 38   | 40   | 27.5 | 69    | 29.5  | 41   | 16.5 | 34.5 | 63.5  |
| 8816 | 92   | 22   | 17.5 | 59.5  | 25    | 34   | 8    | 18   | 51    |
| 8817 | 44   | 27   | 18.5 | 66    | 26    | 36.5 | 11   | 25   | 51.5  |
| 8818 | 37   | 32   | 19.5 | 64    | 35    | 36   | 18   | 26   | 30    |
| 8819 | 29   | 25.5 | 12.5 | 40.5  | 20    | 34   | 8    | 15   | 31    |
| 8820 | 51   | 66   | 33   | 134   | 36.5  | 49   | 25   | 49.5 | 69    |
| 8821 | 48.5 | 33   | 18   | 69    | 30    | 39   | 13   | 25   | 51.5  |
| 8822 | 53   | 56   | 32   | 92    | 40    | 56   | 31   | 48.5 | 77    |
| 8823 | 46   | 46   | 33   | 78.5  | 37    | 46   | 16   | 55   | 44    |
| 8824 | 58   | 42.5 | 26   | 63    | 35    | 46   | 17   | 37   | 44    |
| 8825 | 77.5 | 39   | 23   | 51    | 35    | 46   | 16   | 35   | 87    |
| 8826 | 60   | 104  | 35   | 129.5 | 43    | 59   | 29   | 56   | 98    |
| 8827 | 58   | 55.5 | 31   | 57    | 38    | 56   | 21   | 40   | 85    |
| 8828 | 47   | 70   | 32   | 86    | 40.5  | 49.5 | 28   | 65   | 74    |
| 8829 | 49   | 39   | 18   | 51    | 22.5  | 55   | 11   | 73   | 39    |
| 8830 | 44   | 62.5 | 33   | 80    | 36    | 47   | 26.5 | 52   | 70    |
| 8831 | 35   | 38   | 24   | 62    | 33.5  | 39   | 15   | 31   | 44    |
| 8832 | 72.5 | 82   | 46   | 86.5  | 47    | 80   | 33   | 60   | 90    |
| 8833 | 68   | 91   | 56   | 126   | 75    | 74   | 49   | 81   | 111.5 |
| 8834 | 55   | 71   | 38   | 86.5  | 39    | 59   | 31.5 | 63.5 | 72.5  |

|      |       |      |      |      |       |      |      |      |      |
|------|-------|------|------|------|-------|------|------|------|------|
| 8835 | 34    | 25   | 15.5 | 69.5 | 45.5  | 31   | 9    | 20   | 24   |
| 8836 | 45    | 40   | 26   | 84   | 90    | 41   | 18   | 37   | 45   |
| 8837 | 37    | 40   | 26   | 82   | 36    | 42   | 18   | 40   | 75   |
| 8838 | 35    | 18   | 25   | 68.5 | 25    | 30   | 9    | 17   | 43   |
| 8839 | 43    | 36   | 36   | 77   | 42.5  | 30   | 15   | 35   | 48   |
| 8840 | 65    | 67   | 37   | 90   | 43    | 55   | 25   | 58   | 77.5 |
| 8841 | 34    | 20   | 29   | 60   | 30    | 30   | 11   | 19   | 65   |
| 8842 | 34    | 22   | 14   | 56   | 22    | 27   | 11   | 21   | 36   |
| 8843 | 43    | 21   | 12   | 51.5 | 25    | 28.5 | 9    | 17   | 51   |
| 8844 | 28    | 17   | 14   | 60   | 31    | 25.5 | 9    | 16.5 | 64   |
| 8845 | 27    | 25   | 14   | 63   | 26.5  | 27.5 | 10   | 19   | 38   |
| 8846 | 26    | 14   | 17.5 | 55   | 33    | 21   | 8    | 32   | 18   |
| 8847 | 31    | 21   | 14   | 52   | 20    | 25   | 8    | 19   | 16   |
| 8848 | 36.5  | 42   | 21   | 59   | 29    | 39   | 16   | 37   | 41   |
| 8849 | 47    | 21.5 | 16   | 56   | 38    | 40.5 | 8    | 18   | 45   |
| 8850 | 23    | 16   | 13   | 47   | 28    | 24   | 9.5  | 15   | 34.5 |
| 8851 | 25    | 23   | 16   | 55   | 24    | 28   | 9    | 24   | 23   |
| 8852 | 73    | 17   | 15   | 80.5 | 70.5  | 26   | 8    | 18   | 16   |
| 8853 | 40    | 41   | 29   | 69   | 35    | 36   | 19   | 42   | 46   |
| 8854 | 30    | 19   | 14   | 73.5 | 26.5  | 27   | 10   | 19   | 37   |
| 8855 | 55    | 58.5 | 28   | 71.5 | 33    | 47   | 22.5 | 62.5 | 81   |
| 8856 | 103.5 | 50   | 31   | 83.5 | 33.5  | 47   | 23   | 45   | 60.5 |
| 8857 | 47.5  | 60   | 30   | 91   | 39.5  | 46   | 23   | 47   | 57   |
| 8858 | 96    | 32   | 17   | 76   | 24    | 41   | 13   | 27.5 | 34   |
| 8859 | 18.5  | 15   | 7    | 16   | 512.5 | 24   | 5    | 9    | 15   |
| 8860 | 20    | 16   | 8    | 15   | 23    | 27   | 5    | 8    | 12   |
| 8861 | 19.5  | 16   | 8    | 34   | 32    | 25   | 5    | 10   | 12   |
| 8862 | 17    | 13   | 6    | 22   | 21    | 20   | 5    | 9    | 9    |
| 8863 | 20    | 17   | 9    | 20   | 26.5  | 25   | 6.5  | 12   | 34   |
| 8864 | 22    | 17   | 7    | 15   | 22    | 26   | 5    | 8    | 13   |
| 8865 | 26    | 17   | 16   | 61   | 59.5  | 22   | 12   | 17   | 43   |
| 8866 | 17.5  | 13   | 5    | 13   | 27    | 21   | 6    | 9    | 9    |
| 8867 | 23    | 16   | 11   | 45   | 29    | 22   | 12   | 19   | 27   |
| 8868 | 34    | 16   | 103  | 40   | 49    | 32   | 12   | 18   | 19   |
| 8869 | 44    | 19   | 22   | 55   | 36    | 34   | 14   | 32   | 46.5 |
| 8870 | 24.5  | 13   | 13   | 49.5 | 24    | 21   | 8    | 14   | 13   |
| 8871 | 19    | 18   | 10   | 20   | 56    | 26   | 7    | 11   | 12   |
| 8872 | 38    | 21   | 14   | 48   | 38    | 29   | 13   | 76.5 | 22   |
| 8873 | 34    | 18   | 15   | 72   | 37    | 28   | 31   | 19   | 26   |
| 8874 | 38    | 23   | 14   | 43   | 19    | 38   | 10   | 17   | 28   |
| 8875 | 26    | 17   | 13   | 80   | 25    | 28   | 10   | 18   | 16   |
| 8876 | 27    | 17   | 25   | 77   | 26    | 30   | 8    | 20   | 33   |
| 8877 | 28    | 28   | 18   | 64   | 20.5  | 31   | 11   | 25   | 71.5 |
| 8878 | 42.5  | 20   | 16   | 93.5 | 37    | 30   | 14.5 | 23   | 32   |
| 8879 | 29.5  | 18   | 18   | 63   | 106.5 | 28   | 14   | 18   | 47.5 |
| 8880 | 100   | 21   | 25   | 90   | 416.5 | 32.5 | 65.5 | 113  | 49   |
| 8881 | 34    | 19   | 17   | 67   | 46.5  | 29.5 | 10   | 43   | 44   |

|      |       |      |      |      |      |      |      |      |      |
|------|-------|------|------|------|------|------|------|------|------|
| 8882 | 37    | 21   | 74   | 180  | 41.5 | 30.5 | 60   | 45   | 29   |
| 8883 | 29    | 18   | 15   | 56   | 46.5 | 25   | 46   | 25   | 25   |
| 8884 | 46.5  | 21   | 21.5 | 98   | 41   | 36   | 14   | 25   | 53   |
| 8885 | 32.5  | 20   | 21   | 96   | 37   | 29   | 11   | 25   | 56   |
| 8886 | 27    | 14   | 21   | 88   | 20   | 22   | 9    | 19   | 11   |
| 8887 | 21    | 13   | 16   | 37   | 21   | 22   | 13   | 13   | 22   |
| 8888 | 49    | 16   | 19   | 79   | 28   | 25.5 | 17   | 20   | 18   |
| 8889 | 27    | 75   | 25   | 63   | 24   | 25   | 8    | 17   | 17   |
| 8890 | 26    | 16   | 15   | 81.5 | 24.5 | 23   | 8    | 22   | 20   |
| 8891 | 23    | 16   | 13   | 65   | 29   | 24   | 6    | 15.5 | 21   |
| 8892 | 30.5  | 15   | 12   | 59   | 82   | 25   | 20   | 16   | 36   |
| 8893 | 31    | 16   | 36   | 72   | 37   | 22   | 9    | 26   | 90   |
| 8894 | 54    | 19   | 26   | 86.5 | 70   | 33.5 | 15   | 27   | 269  |
| 8895 | 41    | 18   | 14   | 55   | 37   | 36   | 11.5 | 29   | 156  |
| 8896 | 34    | 18   | 34   | 81   | 34   | 28   | 14   | 26   | 36   |
| 8897 | 42    | 16   | 20   | 70.5 | 206  | 23   | 24   | 24   | 30   |
| 8898 | 35    | 21   | 22   | 71.5 | 41   | 26   | 12.5 | 24   | 43   |
| 8899 | 28.5  | 17   | 18   | 81   | 27.5 | 24   | 16   | 20   | 59   |
| 8900 | 26    | 15   | 12   | 51   | 36.5 | 20   | 19   | 17   | 12   |
| 8901 | 57.5  | 21   | 33.5 | 111  | 242  | 29.5 | 20   | 38.5 | 67   |
| 8902 | 22    | 14   | 15   | 56   | 34.5 | 23   | 9    | 21   | 30.5 |
| 8903 | 66    | 23   | 16.5 | 48.5 | 37.5 | 35   | 11   | 19   | 27   |
| 8904 | 27    | 16   | 10   | 22.5 | 26.5 | 23   | 9    | 22.5 | 19   |
| 8905 | 159.5 | 20   | 22   | 44   | 55   | 23.5 | 85   | 22.5 | 19   |
| 8906 | 83.5  | 27   | 22   | 103  | 39   | 53   | 46.5 | 132  | 28   |
| 8907 | 120   | 45   | 21   | 41   | 32.5 | 86.5 | 20.5 | 30   | 35   |
| 8908 | 22    | 12   | 7    | 36   | 20   | 21   | 5    | 11   | 11   |
| 8909 | 20    | 13   | 9    | 30   | 19   | 22   | 6    | 9    | 8    |
| 8910 | 25    | 14   | 8    | 25   | 22   | 22   | 9    | 37   | 10   |
| 8911 | 22.5  | 13   | 6    | 29   | 41   | 22   | 6    | 13   | 15   |
| 8912 | 27    | 22   | 16   | 46   | 28   | 33   | 21   | 15   | 20   |
| 8913 | 23    | 16   | 8    | 26   | 25.5 | 22   | 15.5 | 16.5 | 9.5  |
| 8914 | 113   | 22   | 18   | 68   | 24   | 25   | 14   | 28   | 28   |
| 8915 | 19    | 14   | 13   | 47.5 | 19   | 17   | 9    | 17.5 | 15   |
| 8916 | 32    | 22   | 24   | 70.5 | 31   | 24   | 18   | 33   | 27   |
| 8917 | 37    | 45   | 30   | 110  | 29   | 36   | 23   | 42.5 | 72   |
| 8918 | 40    | 45   | 27   | 72   | 34   | 38   | 19   | 47   | 60   |
| 8919 | 41.5  | 50   | 26.5 | 62   | 34   | 42   | 21   | 44   | 46   |
| 8920 | 27    | 24   | 17.5 | 61   | 27   | 24   | 14   | 39   | 28   |
| 8921 | 38    | 25   | 26   | 77   | 27   | 21.5 | 13   | 23   | 35   |
| 8922 | 31    | 19   | 18   | 83   | 26   | 24   | 14   | 23   | 23   |
| 8923 | 33    | 47.5 | 27   | 78   | 33   | 32.5 | 21   | 43   | 68   |
| 8924 | 31    | 30   | 112  | 79.5 | 27   | 25   | 17   | 36.5 | 46   |
| 8925 | 203   | 15   | 14   | 77   | 21   | 35   | 13   | 18   | 24   |
| 8926 | 26    | 20   | 18   | 47   | 21   | 19   | 13   | 21   | 41   |
| 8927 | 35    | 46   | 31   | 120  | 31   | 34   | 21   | 47.5 | 40   |
| 8928 | 49    | 70   | 39   | 98   | 44   | 43.5 | 31   | 69   | 69   |



|      |      |      |      |       |      |      |      |      |       |
|------|------|------|------|-------|------|------|------|------|-------|
| 8929 | 27   | 28   | 20   | 60    | 25.5 | 23   | 14   | 28   | 73.5  |
| 8930 | 34   | 15   | 23   | 47    | 26   | 29   | 8    | 17   | 14    |
| 8931 | 28   | 16   | 17   | 59.5  | 25.5 | 22   | 14   | 26.5 | 36    |
| 8932 | 53   | 42   | 28   | 74    | 27.5 | 35.5 | 20   | 44   | 54    |
| 8933 | 40   | 51   | 30   | 79.5  | 35   | 37   | 23   | 52   | 55    |
| 8934 | 23   | 14   | 15   | 48    | 47   | 18   | 9    | 15.5 | 21    |
| 8935 | 27   | 16   | 13   | 61    | 24   | 26   | 8    | 23   | 37.5  |
| 8936 | 55   | 130  | 20   | 119.5 | 26   | 77   | 11   | 34.5 | 64    |
| 8937 | 28.5 | 36   | 20   | 67.5  | 26.5 | 25   | 17   | 34   | 34    |
| 8938 | 66   | 52   | 27   | 87    | 32   | 42   | 21   | 49   | 79    |
| 8939 | 41   | 68.5 | 34   | 103   | 37   | 43.5 | 29   | 64   | 65    |
| 8940 | 27   | 37   | 42   | 84.5  | 27   | 28   | 18   | 34   | 34.5  |
| 8941 | 25   | 24   | 21   | 84    | 24   | 22   | 14   | 23   | 37    |
| 8942 | 38   | 64   | 36   | 104   | 33.5 | 44   | 22   | 51   | 59    |
| 8943 | 20.5 | 13   | 12   | 51    | 23   | 17.5 | 10   | 17   | 23    |
| 8944 | 24   | 13   | 13   | 65    | 20   | 19   | 14   | 42   | 19    |
| 8945 | 33   | 43   | 23   | 82.5  | 39   | 31   | 18   | 49   | 85    |
| 8946 | 69   | 67   | 38   | 89    | 39   | 46.5 | 30   | 63.5 | 72    |
| 8947 | 31   | 24   | 20   | 90    | 29   | 26   | 13   | 26   | 38    |
| 8948 | 25   | 13   | 17   | 82    | 23   | 17   | 9    | 20   | 31    |
| 8949 | 23   | 16   | 18   | 61    | 25   | 20   | 10   | 25   | 26    |
| 8950 | 23   | 27   | 19   | 73    | 22.5 | 23   | 13   | 32   | 31    |
| 8951 | 30   | 39   | 34   | 77    | 31   | 26   | 15   | 36   | 47    |
| 8952 | 35.5 | 61   | 33   | 88.5  | 30   | 36.5 | 24   | 52   | 62    |
| 8953 | 40.5 | 61   | 32   | 111   | 36   | 37   | 28   | 54   | 66    |
| 8954 | 31   | 11   | 14   | 67.5  | 22   | 14   | 10   | 24   | 23    |
| 8955 | 52   | 61   | 45   | 103   | 41   | 51   | 39   | 58   | 101.5 |
| 8956 | 34   | 17   | 19   | 66    | 26   | 22   | 16   | 35   | 31    |
| 8957 | 53   | 32   | 17   | 59    | 31   | 48   | 14   | 31   | 36    |
| 8958 | 29   | 24   | 20   | 65    | 25   | 19   | 13   | 30   | 28    |
| 8959 | 30   | 32   | 22   | 76    | 26   | 25   | 16   | 32   | 39    |
| 8960 | 124  | 55   | 29   | 90.5  | 34   | 40   | 23   | 59   | 63    |
| 8961 | 25   | 21   | 16   | 66    | 26   | 20   | 13   | 25   | 40    |
| 8962 | 26   | 38.5 | 24   | 71    | 24   | 25   | 17   | 37   | 39    |
| 8963 | 44   | 57   | 37   | 90    | 36   | 39.5 | 29   | 55.5 | 68    |
| 8964 | 43.5 | 65   | 30.5 | 85    | 35   | 33.5 | 25   | 62   | 68    |
| 8965 | 22   | 13   | 34   | 62.5  | 24   | 18   | 9    | 20   | 59    |
| 8966 | 18   | 15   | 12   | 45    | 21   | 15   | 11   | 19   | 14    |
| 8967 | 74   | 11   | 15   | 60    | 22   | 15   | 8    | 32   | 13    |
| 8968 | 20   | 11   | 11   | 54.5  | 18   | 15   | 8    | 16   | 11    |
| 8969 | 27   | 32   | 27.5 | 88    | 27.5 | 22   | 15   | 45   | 44    |
| 8970 | 41   | 23   | 18   | 61.5  | 25   | 19   | 14.5 | 33   | 25    |
| 8971 | 32   | 50   | 28   | 84    | 35   | 31   | 21   | 43   | 62    |
| 8972 | 31   | 33   | 21   | 71    | 26   | 25   | 18   | 34   | 58    |
| 8973 | 28   | 34   | 21   | 81    | 28   | 25   | 15   | 40   | 40    |
| 8974 | 20   | 13   | 18   | 53    | 38   | 18   | 9    | 17   | 34    |
| 8975 | 27   | 21   | 17   | 63.5  | 21.5 | 20   | 12   | 28.5 | 55    |

|      |      |      |      |       |      |      |      |      |      |
|------|------|------|------|-------|------|------|------|------|------|
| 8976 | 32   | 48   | 27   | 104   | 32   | 33   | 21   | 49.5 | 64   |
| 8977 | 28   | 26   | 19   | 60.5  | 27   | 22.5 | 15.5 | 33   | 36   |
| 8978 | 29.5 | 26   | 18   | 85    | 30   | 23   | 17.5 | 28   | 37   |
| 8979 | 34   | 40   | 28   | 85    | 45   | 32   | 23   | 46   | 56   |
| 8980 | 43   | 75   | 42   | 102   | 44   | 46   | 33   | 86   | 84   |
| 8981 | 30   | 37   | 22   | 89    | 31.5 | 26   | 18   | 45.5 | 39   |
| 8982 | 42   | 64.5 | 28   | 100   | 31   | 37   | 28   | 57   | 63   |
| 8983 | 117  | 35   | 27   | 107   | 33   | 36   | 31   | 39   | 44.5 |
| 8984 | 24   | 19   | 17   | 78    | 24.5 | 22   | 10   | 67   | 42.5 |
| 8985 | 34   | 38   | 27   | 55    | 30   | 29   | 20   | 38   | 52   |
| 8986 | 29   | 28   | 24   | 70    | 26   | 24   | 17   | 31   | 47   |
| 8987 | 25   | 12   | 10   | 52.5  | 20   | 21   | 8    | 15   | 15   |
| 8988 | 55   | 53   | 36   | 100   | 36.5 | 39   | 31   | 61   | 55   |
| 8989 | 22   | 14   | 14   | 53.5  | 22   | 16   | 9    | 19   | 27   |
| 8990 | 27   | 30   | 22   | 97    | 25   | 26   | 18   | 34   | 42   |
| 8991 | 34.5 | 27   | 24   | 82    | 29   | 29   | 18   | 33   | 46   |
| 8992 | 34.5 | 46   | 26.5 | 82.5  | 37   | 32   | 24   | 53   | 76   |
| 8993 | 32   | 21   | 20   | 71    | 24   | 29.5 | 12   | 32   | 27.5 |
| 8994 | 23   | 19   | 16   | 52    | 21.5 | 17   | 11   | 45.5 | 19   |
| 8995 | 20   | 11   | 12   | 66    | 21   | 14   | 15   | 18   | 17   |
| 8996 | 20   | 11   | 12.5 | 51    | 17   | 14   | 9    | 15   | 13.5 |
| 8997 | 29   | 30   | 22   | 49    | 25   | 28   | 15   | 30   | 29.5 |
| 8998 | 38   | 38   | 24   | 64    | 31   | 35.5 | 21   | 33   | 46   |
| 8999 | 32   | 21   | 22   | 67    | 28   | 27   | 13   | 21   | 26   |
| 9000 | 36.5 | 47   | 32   | 86    | 38   | 38   | 23   | 45.5 | 50   |
| 9001 | 108  | 47   | 22   | 97.5  | 26   | 104  | 13.5 | 27   | 50   |
| 9002 | 55   | 53   | 39   | 82    | 45   | 58   | 63   | 70   | 49   |
| 9003 | 33   | 46   | 28   | 69    | 29   | 34   | 20   | 41   | 42   |
| 9004 | 44   | 42   | 27   | 91    | 33.5 | 35   | 20   | 44   | 44   |
| 9005 | 32   | 33   | 21   | 89    | 27.5 | 30   | 17   | 36   | 34.5 |
| 9006 | 38.5 | 41   | 26   | 86    | 30   | 36   | 22   | 37   | 41   |
| 9007 | 51   | 30   | 29   | 131   | 31.5 | 41   | 15   | 32.5 | 42   |
| 9008 | 35.5 | 30   | 24   | 94.5  | 32   | 29.5 | 20   | 30.5 | 49   |
| 9009 | 30   | 18   | 16   | 48    | 28   | 23   | 10   | 15   | 36   |
| 9010 | 44   | 18   | 21   | 93    | 40   | 24   | 21   | 30   | 41   |
| 9011 | 59   | 18.5 | 14   | 36    | 29   | 25   | 19   | 75   | 28   |
| 9012 | 16   | 12   | 8.5  | 47    | 20   | 16   | 7    | 11   | 11   |
| 9013 | 39   | 19   | 19   | 96    | 51.5 | 25   | 11   | 21   | 19   |
| 9014 | 30   | 16   | 15   | 106.5 | 21   | 23   | 12   | 19   | 25   |
| 9015 | 256  | 59   | 34   | 135.5 | 36   | 128  | 23   | 72   | 51   |
| 9016 | 53   | 64   | 41   | 124   | 41.5 | 46   | 31   | 61   | 79   |
| 9017 | 54.5 | 58   | 31.5 | 131   | 40.5 | 45   | 28   | 53   | 51   |
| 9018 | 28.5 | 19   | 16   | 83    | 20.5 | 26   | 10   | 20   | 29.5 |
| 9019 | 47.5 | 31.5 | 27   | 126.5 | 29   | 29   | 18   | 38   | 30   |
| 9020 | 45.5 | 42.5 | 31   | 121   | 34   | 34   | 22   | 51   | 75   |
| 9021 | 83   | 31   | 23   | 103   | 31.5 | 55   | 16   | 32   | 44   |
| 9022 | 49   | 29   | 21.5 | 99    | 24   | 33   | 16   | 33   | 31   |

|      |       |      |      |       |       |      |      |      |      |
|------|-------|------|------|-------|-------|------|------|------|------|
| 9023 | 42    | 40   | 30   | 104   | 30    | 37   | 20   | 46   | 51   |
| 9024 | 38    | 39   | 28   | 102   | 26.5  | 31   | 19   | 38   | 39   |
| 9025 | 34.5  | 20   | 18   | 77    | 28    | 25   | 12   | 28   | 26.5 |
| 9026 | 27    | 27   | 20   | 75    | 23.5  | 22   | 12   | 38   | 28   |
| 9027 | 42    | 31   | 26   | 126.5 | 26    | 27   | 29   | 36   | 31   |
| 9028 | 31    | 25   | 21   | 98    | 26.5  | 21   | 16   | 35   | 48   |
| 9029 | 85    | 42.5 | 23   | 116   | 26    | 54   | 18   | 43   | 49   |
| 9030 | 37    | 31   | 25   | 95.5  | 26    | 27   | 18   | 34.5 | 35   |
| 9031 | 48    | 59   | 40   | 175   | 38    | 43   | 28   | 62   | 89   |
| 9032 | 49    | 75.5 | 39   | 118.5 | 35    | 44   | 32   | 71   | 116  |
| 9033 | 49    | 45   | 30   | 114   | 30    | 31   | 26   | 46   | 47   |
| 9034 | 37    | 45   | 32   | 104   | 30    | 35   | 21   | 44   | 63   |
| 9035 | 44    | 50   | 28   | 108.5 | 29    | 36.5 | 23   | 47   | 53   |
| 9036 | 36    | 16   | 22   | 103   | 29.5  | 21   | 12   | 28   | 31   |
| 9037 | 35    | 39   | 21   | 75    | 26    | 26   | 15   | 36   | 43   |
| 9038 | 66.5  | 38   | 29   | 102   | 29    | 55   | 17   | 37   | 38   |
| 9039 | 28    | 17   | 18   | 100   | 23    | 22   | 13   | 25.5 | 27   |
| 9040 | 44    | 77   | 38.5 | 117   | 37    | 46   | 29   | 64   | 100  |
| 9041 | 32    | 31   | 24   | 96    | 24    | 30   | 15   | 37   | 49   |
| 9042 | 36    | 43   | 29   | 108   | 29    | 32   | 19   | 57   | 49   |
| 9043 | 35    | 38   | 24.5 | 82    | 28.5  | 28   | 19   | 42   | 49   |
| 9044 | 43    | 45   | 32   | 117   | 31.5  | 35.5 | 23   | 52   | 49   |
| 9045 | 46    | 38   | 26   | 96.5  | 33    | 28   | 21   | 46   | 48   |
| 9046 | 52.5  | 50   | 40   | 150   | 36    | 35.5 | 25   | 58.5 | 51.5 |
| 9047 | 33    | 31   | 22   | 101   | 26    | 29.5 | 15   | 32   | 31   |
| 9048 | 31    | 25   | 24   | 89    | 25    | 17   | 16   | 33.5 | 31   |
| 9049 | 33    | 29   | 27   | 104   | 31    | 24   | 15   | 45   | 62   |
| 9050 | 33    | 27   | 18.5 | 86.5  | 25    | 24   | 13   | 32   | 63   |
| 9051 | 65    | 72   | 43   | 122   | 42.5  | 48   | 36   | 80   | 81.5 |
| 9052 | 44.5  | 57   | 40   | 143   | 37    | 44   | 38   | 54   | 109  |
| 9053 | 36    | 29   | 19   | 87    | 23    | 24   | 14   | 28   | 34   |
| 9054 | 32.5  | 35   | 87   | 97.5  | 25    | 30   | 18   | 44   | 43   |
| 9055 | 44    | 28   | 19   | 99    | 23    | 28   | 17   | 30   | 33   |
| 9056 | 26.5  | 13   | 18   | 77    | 17    | 16   | 9    | 17   | 16   |
| 9057 | 34    | 32   | 22   | 109   | 25    | 27   | 15   | 47   | 36   |
| 9058 | 26.5  | 15   | 36   | 62.5  | 26    | 17   | 123  | 23.5 | 16   |
| 9059 | 40.5  | 13.5 | 20   | 141   | 24    | 18   | 33   | 26   | 19   |
| 9060 | 270.5 | 146  | 151  | 401.5 | 249.5 | 192  | 393  | 337  | 138  |
| 9061 | 43    | 17   | 26   | 145   | 32    | 20   | 31.5 | 36   | 21   |
| 9062 | 29    | 11   | 13   | 126.5 | 18    | 13   | 25   | 24   | 30   |
| 9063 | 22.5  | 15   | 15   | 75.5  | 21    | 17   | 8.5  | 16.5 | 18   |
| 9064 | 48.5  | 12   | 12   | 65    | 29    | 15   | 26   | 30   | 32.5 |
| 9065 | 52    | 19   | 27   | 150   | 28    | 24   | 19   | 40   | 54.5 |
| 9066 | 18    | 11   | 11.5 | 69    | 22    | 13   | 7    | 15   | 11   |
| 9067 | 175   | 41   | 33   | 123   | 56.5  | 45   | 43   | 88.5 | 51   |
| 9068 | 44    | 14   | 21   | 111.5 | 28    | 16   | 12   | 22   | 29.5 |
| 9069 | 27    | 13   | 8    | 32    | 22    | 16   | 8    | 12   | 9    |

|      |       |      |      |       |       |      |      |      |      |
|------|-------|------|------|-------|-------|------|------|------|------|
| 9070 | 31    | 15   | 32   | 64    | 25    | 17   | 10   | 22   | 14   |
| 9071 | 30    | 12   | 24   | 103   | 23    | 18   | 30   | 24   | 18   |
| 9072 | 34    | 12   | 9    | 40    | 25    | 13.5 | 8    | 19   | 11   |
| 9073 | 24    | 12   | 10   | 28    | 23    | 17   | 12   | 18   | 17   |
| 9074 | 51    | 18   | 25   | 145   | 32    | 27   | 14   | 37   | 27   |
| 9075 | 32    | 13   | 15.5 | 76    | 24    | 16   | 16   | 31   | 43   |
| 9076 | 18    | 11.5 | 13   | 40    | 22    | 15   | 12   | 13   | 10   |
| 9077 | 27    | 15   | 11   | 48    | 33.5  | 17   | 19   | 15   | 12.5 |
| 9078 | 26    | 15   | 10   | 90    | 22.5  | 19.5 | 8    | 20   | 11.5 |
| 9079 | 26    | 13.5 | 15   | 111.5 | 18.5  | 16   | 10   | 21.5 | 14   |
| 9080 | 19    | 11   | 9.5  | 36.5  | 20    | 13.5 | 15   | 12   | 10   |
| 9081 | 53    | 15   | 25   | 86    | 27    | 18   | 8    | 34   | 12   |
| 9082 | 25    | 13   | 15   | 109.5 | 27.5  | 16   | 10   | 18.5 | 24   |
| 9083 | 35.5  | 16   | 47   | 65    | 25    | 33.5 | 10   | 19.5 | 81.5 |
| 9084 | 28    | 13   | 12   | 77.5  | 24    | 18   | 16   | 20   | 62   |
| 9085 | 57    | 23   | 28   | 186.5 | 33    | 28   | 20.5 | 78   | 68   |
| 9086 | 26    | 12   | 12   | 73    | 25    | 15   | 10   | 17   | 16   |
| 9087 | 106.5 | 13   | 10.5 | 64.5  | 20.5  | 18   | 9    | 39.5 | 12   |
| 9088 | 22.5  | 11.5 | 9    | 38    | 22    | 13   | 8    | 13.5 | 8    |
| 9089 | 26    | 13   | 10.5 | 65.5  | 25    | 17   | 9    | 18   | 11   |
| 9090 | 21    | 12   | 13   | 80    | 17    | 14   | 8    | 13.5 | 39   |
| 9091 | 23    | 15   | 13   | 71    | 24    | 17   | 10   | 19   | 26.5 |
| 9092 | 24    | 13   | 13   | 58    | 20    | 14   | 9    | 18   | 27   |
| 9093 | 33    | 22   | 19   | 71    | 22    | 27   | 10   | 18   | 35   |
| 9094 | 22    | 13   | 12   | 78    | 21    | 14   | 10   | 16   | 43   |
| 9095 | 17.5  | 11   | 14   | 87.5  | 16    | 11   | 8    | 17   | 34   |
| 9096 | 93.5  | 20.5 | 17.5 | 107.5 | 24    | 45   | 17   | 27   | 18   |
| 9097 | 8.5   | 7    | 4    | 9     | 7.5   | 9    | 5    | 8    | 5    |
| 9098 | 8.5   | 8.5  | 5    | 11    | 8     | 8    | 6    | 11   | 5    |
| 9099 | 24    | 12   | 11   | 43    | 23    | 18   | 9    | 27   | 13.5 |
| 9100 | 31    | 12   | 12   | 89.5  | 21    | 17   | 9    | 18   | 12   |
| 9101 | 40    | 13   | 12   | 39    | 21.5  | 32   | 7    | 14   | 17   |
| 9102 | 104   | 21   | 23   | 123   | 456.5 | 24   | 23   | 31   | 33.5 |
| 9103 | 24    | 15   | 12   | 68    | 26.5  | 17   | 11   | 18   | 14   |
| 9104 | 14.5  | 8    | 8    | 28    | 18    | 11   | 7    | 10   | 7    |
| 9105 | 11    | 9    | 5    | 19    | 18.5  | 8.5  | 6    | 10   | 6    |
| 9106 | 17.5  | 9    | 7    | 33    | 15    | 12   | 9    | 14   | 9    |
| 9107 | 14.5  | 10   | 5    | 21    | 19    | 11   | 6    | 13   | 6    |
| 9108 | 13    | 9    | 6    | 19    | 17    | 9    | 6    | 10   | 7.5  |
| 9109 | 26.5  | 15   | 8    | 24    | 20    | 23   | 7    | 13   | 16   |
| 9110 | 19    | 10   | 11   | 55    | 23.5  | 11   | 8    | 14   | 13   |
| 9111 | 94.5  | 11   | 9    | 70    | 20    | 12   | 9    | 20   | 30   |
| 9112 | 40    | 14   | 19   | 100   | 29.5  | 19   | 26   | 39   | 31   |
| 9113 | 18    | 10   | 8    | 52.5  | 23    | 15   | 7    | 14   | 49.5 |
| 9114 | 25    | 13   | 15   | 17    | 29    | 16   | 10   | 13.5 | 10   |
| 9115 | 26    | 12   | 10   | 24    | 23    | 14   | 8    | 12   | 11   |
| 9116 | 35    | 15   | 22   | 108   | 27    | 18   | 25   | 30.5 | 19   |

|      |      |      |      |       |      |      |      |      |      |
|------|------|------|------|-------|------|------|------|------|------|
| 9117 | 36   | 27   | 22   | 114.5 | 22   | 24   | 28   | 39   | 22   |
| 9118 | 32   | 14   | 21   | 119   | 29.5 | 16   | 21   | 109  | 169  |
| 9119 | 82   | 28   | 63   | 102   | 38   | 28   | 27   | 75   | 85   |
| 9120 | 99   | 11   | 13.5 | 87    | 29   | 16   | 14   | 67   | 11   |
| 9121 | 26   | 10   | 13   | 71    | 19   | 13   | 11.5 | 29.5 | 11   |
| 9122 | 71   | 16   | 21   | 33    | 31   | 26   | 14   | 17   | 21   |
| 9123 | 34   | 36   | 22   | 86    | 26   | 26   | 19   | 41   | 40   |
| 9124 | 21   | 10   | 10   | 88.5  | 14   | 16   | 6    | 18.5 | 16   |
| 9125 | 27   | 11   | 15   | 76    | 19   | 18   | 9    | 16   | 12   |
| 9126 | 47   | 40.5 | 29   | 103   | 51   | 30   | 23   | 40   | 56   |
| 9127 | 36   | 31.5 | 25   | 99    | 26.5 | 23   | 17   | 41   | 45   |
| 9128 | 53   | 58   | 34   | 115   | 30   | 41   | 25   | 62   | 57   |
| 9129 | 56.5 | 49.5 | 32   | 123   | 29   | 48   | 24   | 58   | 65   |
| 9130 | 32.5 | 19   | 21   | 73    | 22   | 15.5 | 11   | 23   | 26   |
| 9131 | 35   | 17   | 17   | 96    | 33.5 | 23.5 | 9    | 24   | 18   |
| 9132 | 34.5 | 21   | 23   | 109.5 | 19   | 23   | 14   | 65   | 15   |
| 9133 | 38.5 | 52   | 25   | 111   | 24   | 28   | 22   | 77   | 59   |
| 9134 | 26   | 9    | 17   | 83    | 21   | 12   | 9    | 33   | 88   |
| 9135 | 27   | 38   | 21   | 79.5  | 25.5 | 24   | 18   | 40   | 36   |
| 9136 | 35   | 40   | 24   | 106   | 29.5 | 33   | 27   | 41   | 45   |
| 9137 | 42   | 34   | 24   | 98    | 25   | 22   | 16   | 35   | 46   |
| 9138 | 24.5 | 12   | 12   | 70    | 17   | 13   | 15   | 20   | 27.5 |
| 9139 | 28   | 22   | 16   | 83    | 30   | 19   | 14   | 28   | 48   |
| 9140 | 29   | 19   | 17   | 112   | 21   | 18   | 12   | 30   | 39   |
| 9141 | 27.5 | 22   | 15   | 78    | 18   | 20   | 12   | 27   | 51   |
| 9142 | 37   | 32   | 24   | 83.5  | 24   | 25   | 17   | 34.5 | 59   |
| 9143 | 43.5 | 59   | 33   | 177   | 33   | 44   | 29.5 | 63   | 59   |
| 9144 | 24   | 20   | 19   | 95    | 21   | 16   | 11   | 29   | 30   |
| 9145 | 30   | 24   | 22.5 | 88    | 21   | 22   | 14   | 34   | 35   |
| 9146 | 39   | 38   | 20   | 86.5  | 26   | 37   | 22   | 38   | 38   |
| 9147 | 22.5 | 18.5 | 13   | 82    | 20   | 16   | 10   | 24   | 32   |
| 9148 | 58   | 37   | 24   | 111   | 22.5 | 29   | 17   | 48   | 49   |
| 9149 | 33.5 | 16   | 16   | 87    | 22   | 17   | 13   | 27   | 28   |
| 9150 | 23   | 15   | 21   | 100   | 18   | 15   | 9    | 26   | 38.5 |
| 9151 | 50   | 35   | 30   | 146   | 34   | 27   | 24   | 41   | 31   |
| 9152 | 30   | 41.5 | 23   | 87    | 24.5 | 29   | 19   | 42   | 40   |
| 9153 | 31   | 17   | 13   | 83    | 18   | 21   | 11   | 21   | 19   |
| 9154 | 31   | 22   | 21   | 104   | 21   | 16   | 22   | 33   | 73   |
| 9155 | 24   | 25   | 22   | 80.5  | 31   | 18.5 | 13   | 27   | 37   |
| 9156 | 34.5 | 36   | 20   | 87    | 20   | 26   | 16   | 44   | 62   |
| 9157 | 24   | 27   | 20   | 79    | 25   | 21   | 13   | 38   | 28   |
| 9158 | 34.5 | 34   | 27   | 96.5  | 26   | 28   | 20.5 | 41   | 39   |
| 9159 | 21   | 11   | 12   | 75    | 17   | 14   | 7    | 18   | 88   |
| 9160 | 29   | 11   | 18   | 94.5  | 19   | 13   | 11   | 20.5 | 24   |
| 9161 | 56   | 33   | 15   | 67    | 18   | 44   | 11   | 26   | 30   |
| 9162 | 58   | 23   | 26.5 | 92    | 18   | 18   | 11   | 28.5 | 31   |
| 9163 | 22   | 9    | 14   | 57.5  | 14   | 11   | 8    | 16   | 11   |

|      |       |      |      |       |      |      |      |      |       |
|------|-------|------|------|-------|------|------|------|------|-------|
| 9164 | 25    | 10   | 15   | 106   | 18   | 15   | 9    | 27   | 27    |
| 9165 | 24    | 12   | 13   | 69    | 15   | 17   | 10   | 16   | 28    |
| 9166 | 22    | 9.5  | 11   | 74    | 15   | 14   | 7    | 16   | 9     |
| 9167 | 24    | 13   | 14   | 72    | 19   | 11   | 9    | 20   | 17    |
| 9168 | 29    | 8    | 12   | 52    | 17   | 13   | 7    | 14.5 | 10    |
| 9169 | 37    | 30.5 | 23   | 109   | 35   | 24   | 29   | 40.5 | 43    |
| 9170 | 44    | 51.5 | 31   | 93    | 31.5 | 34   | 24   | 51   | 72    |
| 9171 | 31    | 17   | 14   | 73    | 20   | 17   | 11   | 25   | 18    |
| 9172 | 67    | 28   | 16   | 66    | 21.5 | 56   | 11   | 27   | 25    |
| 9173 | 34    | 19   | 16   | 92    | 20   | 14   | 16   | 37   | 34    |
| 9174 | 34    | 31   | 18   | 78    | 21   | 32   | 17.5 | 70.5 | 47    |
| 9175 | 25    | 16   | 16   | 75    | 22   | 15   | 12   | 23   | 23.5  |
| 9176 | 45    | 57.5 | 38   | 126   | 38   | 35   | 60.5 | 67   | 64    |
| 9177 | 79    | 62   | 34   | 101.5 | 37   | 61   | 25   | 57   | 73    |
| 9178 | 49    | 36   | 41   | 108   | 29   | 29   | 25   | 44   | 37    |
| 9179 | 127   | 49   | 42   | 150   | 35   | 41   | 60   | 58   | 60    |
| 9180 | 47.5  | 21   | 38   | 129   | 38   | 28   | 16   | 34   | 39    |
| 9181 | 59.5  | 75   | 46   | 135   | 45   | 57   | 35   | 78   | 186.5 |
| 9182 | 35    | 39   | 26   | 129   | 30   | 28   | 18   | 38   | 71    |
| 9183 | 63    | 23   | 19   | 97    | 25   | 60.5 | 10   | 29   | 27    |
| 9184 | 41    | 20   | 23   | 144.5 | 31   | 20   | 12   | 26   | 46    |
| 9185 | 58    | 30   | 41   | 132   | 53   | 42   | 50   | 36   | 56    |
| 9186 | 45    | 23   | 21   | 83    | 26   | 26   | 14   | 78   | 34    |
| 9187 | 104   | 26   | 21.5 | 86    | 23.5 | 35   | 17   | 37   | 87.5  |
| 9188 | 26    | 11   | 13   | 36    | 31   | 13   | 16   | 26   | 12    |
| 9189 | 23    | 13   | 13   | 59.5  | 23.5 | 13   | 8    | 16   | 15    |
| 9190 | 45    | 28   | 30   | 148   | 33.5 | 31.5 | 20   | 47   | 58    |
| 9191 | 41    | 12   | 16   | 64    | 89   | 18.5 | 10   | 28   | 31    |
| 9192 | 23    | 14   | 9    | 42    | 24   | 19   | 10   | 13   | 11    |
| 9193 | 23    | 18   | 20   | 81    | 23.5 | 17   | 20   | 16.5 | 13    |
| 9194 | 30.5  | 16.5 | 16   | 105.5 | 26   | 20   | 314  | 23   | 35    |
| 9195 | 17    | 11   | 14   | 70    | 18   | 12   | 7    | 22   | 19    |
| 9196 | 27.5  | 10   | 16   | 60.5  | 23   | 16   | 8    | 18   | 68    |
| 9197 | 29    | 23   | 21   | 58    | 26.5 | 16   | 13   | 32   | 41.5  |
| 9198 | 27    | 11.5 | 11   | 24    | 24   | 15   | 9    | 13   | 14    |
| 9199 | 39    | 24   | 16   | 82    | 68   | 27   | 13   | 35   | 24    |
| 9200 | 29    | 21   | 15   | 61    | 20   | 20   | 8    | 20   | 64    |
| 9201 | 23    | 14   | 14   | 48.5  | 28   | 17   | 8    | 14.5 | 10    |
| 9202 | 22    | 18   | 15   | 41.5  | 123  | 18   | 9    | 21   | 51    |
| 9203 | 33    | 14   | 13   | 72    | 22   | 17.5 | 9    | 24   | 10    |
| 9204 | 25    | 11   | 13   | 45    | 28   | 12   | 8    | 19   | 22    |
| 9205 | 19    | 10   | 10   | 34    | 18   | 10   | 8    | 12   | 93    |
| 9206 | 39.5  | 14   | 17   | 77    | 31   | 17   | 14   | 25   | 37    |
| 9207 | 126.5 | 12   | 13   | 54    | 28.5 | 15   | 16   | 108  | 19    |
| 9208 | 26    | 15   | 24   | 88    | 20   | 22   | 9    | 18   | 39    |
| 9209 | 44    | 54   | 39   | 115   | 37   | 39   | 28   | 61   | 72    |
| 9210 | 28.5  | 17   | 19   | 153.5 | 30   | 19   | 14   | 23   | 23    |

|      |       |      |      |       |      |      |      |      |      |
|------|-------|------|------|-------|------|------|------|------|------|
| 9211 | 149.5 | 71   | 116  | 262   | 749  | 75   | 55   | 73   | 118  |
| 9212 | 58    | 16.5 | 13.5 | 69    | 25   | 48.5 | 7    | 16   | 17   |
| 9213 | 29.5  | 47   | 28   | 90    | 25   | 28   | 21   | 49   | 52   |
| 9214 | -1    | 43   | 25   | 148   | 22   | 11   | 13   | 21.5 | 33   |
| 9215 | 24    | 20   | 20   | 150   | 21   | 18   | 14   | 33   | 53   |
| 9216 | 28.5  | 12   | 18   | 176.5 | 20   | -1   | 13   | 26.5 | -1   |
| 9217 | -1    | 27   | 27   | -1    | 20   | 18   | 21   | -1   | 52.5 |
| 9218 | 36    | 28   | 27   | 89    | 26   | 31   | 13.5 | 31   | 29   |
| 9219 | 37    | 25   | 23   | 111.5 | 25   | 22   | 12.5 | 80   | 29   |
| 9220 | 38    | 40   | 28   | 112   | 31   | 24   | 21   | 53   | 50   |
| 9221 | 203   | 16   | 29.5 | 77    | 24   | 29   | 9    | 21.5 | 25   |
| 9222 | 29    | 11   | 23.5 | 91.5  | 25   | 14   | 11   | 25   | 27   |
| 9223 | 28    | 14   | 17   | 97    | 22   | 15   | 10   | 27.5 | 25   |
| 9224 | 30    | 27   | 22.5 | 111   | 22   | 21   | 13   | 35   | 39   |
| 9225 | 32.5  | 34   | 22   | 103   | 27   | 24.5 | 18   | 42.5 | 31   |
| 9226 | 36    | 38   | 28   | 104   | 24   | 23   | 76   | 43   | 47   |
| 9227 | 30    | 33   | 22   | 114   | 23   | 24   | 13.5 | 42   | 56   |
| 9228 | 27    | 40   | 24   | 111   | 28   | 23   | 17   | 44   | 46   |
| 9229 | 15.5  | 8    | 10   | 76    | 14   | 10   | 7    | 16   | 21   |
| 9230 | 32.5  | 37   | 26   | 116   | 25   | 27   | 18   | 41.5 | 46   |
| 9231 | 26.5  | 19   | 14   | 65    | 18   | 21   | 8    | 20   | 30   |
| 9232 | 41    | 13   | 16   | 88.5  | 22   | 12   | 10   | 69   | 40   |
| 9233 | 61    | 12   | 15   | 84    | 22   | 15   | 8    | 19.5 | 24   |
| 9234 | 28    | 12   | 15   | 92    | 20.5 | 16   | 10   | 20   | 23   |
| 9235 | 63    | 15.5 | 15   | 108   | 23   | 14.5 | 10   | 28   | 62.5 |
| 9236 | 31    | 37   | 29   | 110   | 26   | 23   | 16   | 42   | 47   |
| 9237 | 33    | 48   | 27   | 119   | 27   | 27   | 22   | 51   | 49   |
| 9238 | 36    | 55   | 33   | 113   | 31   | 33   | 27   | 55.5 | 65   |
| 9239 | 30    | 45   | 25   | 84.5  | 23.5 | 32.5 | 18   | 42   | 47   |
| 9240 | 31    | 31   | 24   | 97.5  | 26   | 22.5 | 18   | 39   | 63   |
| 9241 | 34    | 14   | 19   | 76    | 18   | 16   | 12   | 31   | 20   |
| 9242 | 44    | 22   | 29   | 139   | 31   | 24   | 15   | 38   | 40   |
| 9243 | 34.5  | 17   | 26   | 92    | 22   | 21   | 20.5 | 29   | 24   |
| 9244 | 30    | 15   | 16   | 75    | 22   | 22   | 9    | 22   | 36   |
| 9245 | 42    | 19   | 20   | 91    | 23.5 | 24   | 13   | 29   | 81.5 |
| 9246 | 23    | 12   | 20   | 83    | 33   | 14   | 9    | 22   | 36   |
| 9247 | 21.5  | 13   | 17   | 82    | 17.5 | 14   | 9.5  | 31   | 27.5 |
| 9248 | 38    | 33   | 24   | 98    | 26   | 32   | 17   | 44   | 39   |
| 9249 | 49.5  | 25   | 20   | 109   | 24.5 | 42.5 | 13.5 | 32   | 34.5 |
| 9250 | 41    | 22   | 23   | 121   | 38   | 25   | 27   | 45   | 34   |
| 9251 | 50    | 62   | 34   | 113.5 | 37.5 | 36   | 28   | 61   | 73   |
| 9252 | 42    | 31   | 26   | 110   | 31   | 24   | 19.5 | 51.5 | 38   |
| 9253 | 23    | 11   | 12   | 130   | 18   | 14   | 8    | 25   | 18   |
| 9254 | 32    | 43   | 29   | 106   | 27   | 30   | 20.5 | 57   | 43   |
| 9255 | 80    | 28.5 | 17   | 99    | 24   | 45   | 13   | 26   | 68   |
| 9256 | 44.5  | 62   | 44   | 173   | 33.5 | 43   | 30   | 68   | 68   |
| 9257 | 44    | 58   | 31   | 162   | 28   | 40   | 26   | 63   | 51   |

|      |      |      |      |       |      |      |      |      |       |
|------|------|------|------|-------|------|------|------|------|-------|
| 9258 | 36   | 32   | 25   | 110   | 25   | 26   | 20   | 35.5 | 34    |
| 9259 | 65.5 | 47   | 39   | 137   | 36.5 | 40.5 | 38.5 | 60   | 80.5  |
| 9260 | 29   | 34   | 23   | 93    | 22.5 | 25   | 17   | 38   | 66    |
| 9261 | 15.5 | 9    | 8    | 69    | 15   | 11   | 7    | 20.5 | 7     |
| 9262 | 24   | 12   | 18   | 87    | 20   | 10   | 9    | 25   | 10    |
| 9263 | 20   | 12   | 17   | 94    | 19   | 11.5 | 10   | 30   | 38    |
| 9264 | 20   | 10   | 15   | 94.5  | 20.5 | 14   | 9    | 16   | 13    |
| 9265 | 14   | 7    | 6    | 35    | 14   | 9    | 6    | 9    | 6     |
| 9266 | 21   | 11   | 10   | 112   | 17   | 11   | 7    | 17   | 8     |
| 9267 | 35   | 15   | 15   | 84    | 22   | 19   | 10.5 | 27   | 38    |
| 9268 | 10   | 6    | 5.5  | 13    | 14   | 7    | 5    | 9    | 4     |
| 9269 | 17   | 7    | 11   | 75.5  | 16   | 9    | 7    | 14   | 8     |
| 9270 | 55   | 18   | 23   | 99    | 30   | 23   | 14   | 99   | 33    |
| 9271 | 185  | 17.5 | 24   | 53    | 38   | 20   | 19   | 141  | 17    |
| 9272 | 28   | 19   | 20.5 | 89    | 27.5 | 20   | 12   | 32   | 148   |
| 9273 | 115  | 37   | 39.5 | 267   | 45.5 | 63   | 27   | 214  | 520   |
| 9274 | 43   | 21   | 23   | 142.5 | 27   | 23.5 | 14.5 | 42   | 106   |
| 9275 | 8    | 7.5  | 4    | 9     | 7    | 7    | 5    | 9    | 4     |
| 9276 | 27   | 10   | 10   | 111   | 17   | 13.5 | 10.5 | 29   | 7     |
| 9277 | 28   | 12   | 15   | 73    | 21   | 17.5 | 10   | 25   | 11    |
| 9278 | 20   | 10   | 9    | 73    | 18.5 | 18   | 8    | 18   | 7     |
| 9279 | 54   | 26   | 22   | 136.5 | 29.5 | 30.5 | 15   | 30.5 | 60    |
| 9280 | 54   | 13   | 10   | 59    | 24   | 15   | 18   | 100  | 20    |
| 9281 | 25   | 14   | 12   | 157   | 22   | 17.5 | 9    | 17   | 8     |
| 9282 | 21   | 9    | 8    | 61.5  | 18   | 12.5 | 7    | 11.5 | 19    |
| 9283 | 14   | 8    | 9    | 53    | 21   | 10   | 8    | 13   | 7     |
| 9284 | 13.5 | 9    | 7    | 46.5  | 17.5 | 11   | 7    | 14   | 7     |
| 9285 | 17   | 9    | 10   | 51    | 25   | 12   | 11   | 17   | 8     |
| 9286 | 31   | 20   | 16   | 57    | 20   | 26   | 10   | 16   | 22    |
| 9287 | 135  | 21   | 19   | 91    | 25.5 | 29   | 15   | 28.5 | 35    |
| 9288 | 34   | 26   | 20   | 68.5  | 20   | 26   | 14   | 25   | 25    |
| 9289 | 53   | 48   | 32   | 81    | 29   | 44   | 30   | 37.5 | 88    |
| 9290 | 48.5 | 65   | 35   | 79    | 36   | 59.5 | 27   | 51   | 87    |
| 9291 | 56   | 47.5 | 25   | 68    | 26.5 | 40   | 21   | 38   | 67    |
| 9292 | 33.5 | 19.5 | 16   | 73    | 25   | 25   | 11   | 45   | 27    |
| 9293 | 61.5 | 75   | 35   | 139.5 | 33   | 54   | 24   | 65   | 70    |
| 9294 | 44.5 | 31   | 22   | 94.5  | 24   | 27   | 13   | 41   | 27    |
| 9295 | 38   | 23   | 30   | 76    | 21.5 | 30   | 14   | 25   | 31    |
| 9296 | 36   | 38   | 24   | 68.5  | 29   | 32   | 19   | 38   | 46    |
| 9297 | 40.5 | 25.5 | 25   | 91    | 26   | 26.5 | 27.5 | 33   | 80    |
| 9298 | 39.5 | 36   | 51.5 | 87    | 31   | 31   | 18   | 40   | 42    |
| 9299 | 51   | 32   | 27.5 | 90    | 26   | 34   | 18   | 38   | 164.5 |
| 9300 | 36   | 25   | 21   | 73    | 24   | 25   | 13   | 32   | 42    |
| 9301 | 56.5 | 48   | 29   | 98    | 25.5 | 51.5 | 20   | 40   | 55    |
| 9302 | 47   | 54   | 38   | 99    | 34   | 42   | 30   | 51   | 60    |
| 9303 | 22   | 18   | 14   | 53    | 20.5 | 22   | 10   | 22   | 41    |
| 9304 | 53   | 54   | 31   | 99    | 36   | 38   | 27   | 66   | 68    |



|      |      |      |      |       |      |       |      |      |       |
|------|------|------|------|-------|------|-------|------|------|-------|
| 9305 | 44   | 52   | 41.5 | 94    | 27.5 | 38.5  | 25   | 48   | 73    |
| 9306 | 58.5 | 27   | 20   | 89.5  | 24   | 29    | 19   | 29   | 44    |
| 9307 | 39   | 22   | 19   | 84    | 34   | 26.5  | 12   | 33.5 | 25.5  |
| 9308 | 27   | 20   | 16   | 72    | 19.5 | 23    | 9    | 17   | 23.5  |
| 9309 | 159  | 63   | 40   | 110   | 31   | 47    | 30   | 54   | 59    |
| 9310 | 54   | 38   | 37   | 97    | 28.5 | 31    | 19   | 42   | 48    |
| 9311 | 38   | 28   | 21   | 72    | 28.5 | 27    | 15   | 30   | 38    |
| 9312 | 30   | 34   | 25   | 81    | 23   | 30    | 16   | 33   | 42    |
| 9313 | 42.5 | 41.5 | 27   | 80    | 37   | 34    | 22   | 39.5 | 52    |
| 9314 | 27.5 | 22   | 17   | 63.5  | 22   | 25    | 12   | 24   | 26    |
| 9315 | 31   | 31   | 23   | 78    | 23   | 27.5  | 16   | 28   | 34    |
| 9316 | 53.5 | 51   | 32   | 88    | 30   | 37    | 24   | 48.5 | 50.5  |
| 9317 | 87   | 18   | 21   | 99    | 25   | 25    | 15   | 39.5 | 28    |
| 9318 | 32   | 16   | 19   | 72    | 19   | 22    | 11   | 23   | 20    |
| 9319 | 44   | 61   | 32   | 109   | 34   | 39.5  | 43   | 55   | 83    |
| 9320 | 53   | 28   | 21   | 82    | 35.5 | 27    | 17   | 37   | 132.5 |
| 9321 | 40   | 39   | 28   | 94.5  | 51.5 | 36    | 21   | 42   | 91    |
| 9322 | 32   | 21   | 17.5 | 87    | 23   | 22.5  | 12   | 23   | 30    |
| 9323 | 31   | 23   | 18   | 77    | 23   | 22    | 14   | 27   | 23    |
| 9324 | 34   | 20   | 13   | 51    | 18   | 27    | 13.5 | 18   | 27    |
| 9325 | 29   | 25   | 20   | 76    | 19   | 23    | 14   | 26   | 27    |
| 9326 | 26   | 18   | 15   | 77    | 17   | 22    | 13   | 20   | 29    |
| 9327 | 84   | 70   | 31   | 117.5 | 32   | 106.5 | 23   | 47   | 73    |
| 9328 | 45.5 | 56   | 32   | 91    | 29   | 34    | 25   | 50   | 69    |
| 9329 | 31   | 18.5 | 18   | 67    | 25.5 | 23    | 14   | 23   | 24.5  |
| 9330 | 28   | 18.5 | 17   | 59    | 22   | 23    | 12   | 28   | 28    |
| 9331 | 51   | 60   | 31   | 102.5 | 39.5 | 38    | 25   | 56   | 59    |
| 9332 | 17   | 12   | 9    | 26    | 17   | 17    | 13   | 13   | 11    |
| 9333 | 81.5 | 36   | 30.5 | 144.5 | 26   | 35    | 23   | 71   | 36    |
| 9334 | 38   | 25   | 18   | 68    | 22   | 26    | 15   | 26   | 44    |
| 9335 | 23   | 15   | 10.5 | 43    | 20   | 17    | 9    | 19   | 14    |
| 9336 | 43   | 22   | 34   | 129.5 | 28   | 28    | 32   | 37.5 | 32.5  |
| 9337 | 29   | 15.5 | 17   | 97.5  | 27   | 20    | 25.5 | 24.5 | 21    |
| 9338 | 30   | 17   | 15   | 67    | 26   | 20    | 19   | 16   | 20    |
| 9339 | 27.5 | 19   | 13   | 35    | 19   | 24.5  | 12   | 18   | 20    |
| 9340 | 28   | 20   | 19   | 73    | 21   | 21    | 13   | 17   | 45    |
| 9341 | 25   | 15   | 14   | 42    | 18   | 20    | 23   | 21   | 20    |
| 9342 | 31   | 14   | 14   | 36    | 19   | 20    | 13   | 12   | 14    |
| 9343 | 33   | 18   | 15   | 35    | 29   | 21    | 50   | 28   | 19    |
| 9344 | 34   | 16   | 14   | 49    | 18.5 | 18.5  | 14   | 40.5 | 15    |
| 9345 | 31   | 17   | 13   | 45.5  | 23   | 22    | 18   | 30   | 15    |
| 9346 | 28   | 16   | 14   | 82    | 21.5 | 19    | 11   | 28   | 12    |
| 9347 | 52.5 | 38   | 19   | 71    | 24   | 29    | 19   | 34   | 54    |
| 9348 | 17.5 | 11   | 9    | 43    | 17   | 15    | 8    | 12   | 10.5  |
| 9349 | 41   | 13   | 11   | 153   | 18   | 20    | 8    | 21   | 9     |
| 9350 | 24   | 13   | 14   | 68.5  | 24   | 16    | 38   | 21   | 13    |
| 9351 | 57   | 79   | 14   | 63    | 20.5 | 19    | 16   | 20   | 20    |

|      |      |      |      |      |      |      |      |      |       |
|------|------|------|------|------|------|------|------|------|-------|
| 9352 | 31   | 16   | 13   | 38   | 18   | 19   | 11   | 40   | 12    |
| 9353 | 36   | 15   | 16   | 93   | 24.5 | 22.5 | 17   | 24   | 19    |
| 9354 | 33   | 16   | 14   | 88   | 23.5 | 20   | 22.5 | 24   | 239.5 |
| 9355 | 35   | 16   | 17   | 65   | 24   | 23   | 14   | 23   | 20    |
| 9356 | 31.5 | 14   | 14   | 38   | 22   | 23   | 10   | 24   | 22    |
| 9357 | 30   | 23   | 13   | 39   | 22   | 21   | 12   | 22   | 70.5  |
| 9358 | 51   | 26   | 19   | 54   | 37   | 22   | 33   | 42   | 28    |
| 9359 | 23   | 16   | 12   | 52   | 13   | 18   | 9    | 15   | 32    |
| 9360 | 25   | 16   | 13   | 66.5 | 24   | 19   | 8    | 18   | 17    |
| 9361 | 19   | 12   | 8    | 25   | 15.5 | 17   | 9    | 12   | 11    |
| 9362 | 20   | 13   | 9    | 20   | 17   | 17   | 11   | 12   | 9     |
| 9363 | 67.5 | 28   | 39   | 99   | 43.5 | 28   | 21   | 62   | 29    |
| 9364 | 28   | 12   | 10   | 35   | 24   | 18   | 12   | 29   | 11    |
| 9365 | 21   | 16   | 11.5 | 43   | 20   | 19   | 9    | 18   | 20    |
| 9366 | 55.5 | 14   | 14   | 44   | 26   | 20   | 17   | 23   | 19    |
| 9367 | 23   | 12   | 9    | 57   | 16   | 16   | 7    | 13   | 11    |
| 9368 | 25   | 16   | 14   | 68.5 | 19   | 19   | 12.5 | 23   | 43.5  |
| 9369 | 19.5 | 18   | 10   | 45.5 | 16   | 19   | 9    | 19   | 19    |
| 9370 | 43   | 23   | 24   | 89   | 30   | 29   | 15   | 64   | 38    |
| 9371 | 50   | 19   | 28   | 127  | 24   | 21   | 17   | 41   | 44    |
| 9372 | 24   | 12   | 11   | 42   | 18   | 16   | 8    | 14   | 11    |
| 9373 | 23   | 13   | 18   | 70   | 19   | 16   | 11   | 17   | 21    |
| 9374 | 26   | 15   | 15   | 54   | 19   | 19   | 10   | 55   | 15    |
| 9375 | 34   | 17   | 17   | 94   | 20.5 | 22   | 11   | 27.5 | 60    |
| 9376 | 28   | 12.5 | 15   | 73   | 19   | 16   | 10   | 18   | 29.5  |
| 9377 | 27   | 21   | 14   | 65   | 18   | 17   | 11   | 23   | 20    |
| 9378 | 35   | 24   | 18   | 76   | 20   | 19   | 15   | 29   | 32.5  |
| 9379 | 29.5 | 15   | 17   | 87   | 19   | 16.5 | 10.5 | 24   | 19    |
| 9380 | 24.5 | 16   | 16   | 76   | 15.5 | 18   | 8    | 24   | 22.5  |
| 9381 | 20   | 12   | 14   | 78   | 19   | 15   | 8    | 21   | 35    |
| 9382 | 27.5 | 21   | 17   | 65   | 19   | 17   | 10   | 31   | 28.5  |
| 9383 | 28   | 18   | 19   | 81   | 19   | 16   | 10   | 23   | 30    |
| 9384 | 37   | 22   | 19   | 84   | 19   | 21   | 13   | 29   | 33    |
| 9385 | 43.5 | 20   | 15   | 77.5 | 16   | 17   | 9    | 22   | 32    |
| 9386 | 22   | 12   | 10   | 33   | 15   | 14   | 8    | 12   | 11    |
| 9387 | 24   | 13   | 14   | 65   | 18   | 15   | 8    | 18   | 17    |
| 9388 | 55   | 16   | 17   | 67   | 66   | 18   | 14   | 77   | 57    |
| 9389 | 51.5 | 22   | 26   | 123  | 29   | 24   | 15   | 46   | 111   |
| 9390 | 70   | 21   | 18   | 42   | 28   | 37   | 18   | 34   | 34    |
| 9391 | 25   | 14   | 11   | 41   | 19   | 16.5 | 9.5  | 23   | 11    |
| 9392 | 33   | 15   | 15   | 27   | 55   | 19   | 12   | 22   | 18    |
| 9393 | 39   | 33.5 | 22   | 73   | 20   | 29   | 17   | 33   | 61    |
| 9394 | 27   | 17   | 15   | 59   | 15   | 16   | 9    | 20   | 27    |
| 9395 | 36   | 34   | 21   | 92.5 | 26   | 27   | 19   | 33   | 47    |
| 9396 | 70   | 66   | 37   | 98   | 41   | 42   | 33   | 63   | 72.5  |
| 9397 | 33   | 46.5 | 27   | 85   | 27   | 28   | 23   | 49   | 55    |
| 9398 | 49   | 45   | 26   | 87   | 30   | 35   | 24   | 67   | 59    |

|      |      |      |      |       |      |      |      |      |      |
|------|------|------|------|-------|------|------|------|------|------|
| 9399 | 26   | 15   | 13   | 50    | 17   | 16   | 11   | 23   | 21.5 |
| 9400 | 31   | 34   | 21.5 | 74    | 23.5 | 25   | 17   | 46   | 41   |
| 9401 | 33   | 30   | 19   | 70    | 20.5 | 22   | 15   | 34   | 39.5 |
| 9402 | 36   | 41   | 26   | 72.5  | 27   | 25.5 | 20   | 48   | 44.5 |
| 9403 | 47.5 | 65   | 36   | 102.5 | 80   | 39   | 28   | 65.5 | 70   |
| 9404 | 29   | 31   | 19   | 59.5  | 22   | 21   | 16   | 34   | 33   |
| 9405 | 28   | 25.5 | 18   | 78    | 19.5 | 21   | 16   | 31   | 35   |
| 9406 | 30   | 16   | 24   | 62.5  | 19   | 18   | 13   | 26   | 28   |
| 9407 | 28.5 | 17   | 16   | 72.5  | 20   | 18.5 | 10   | 24.5 | 56.5 |
| 9408 | 49   | 46   | 27   | 96.5  | 34   | 46   | 23   | 53   | 50   |
| 9409 | 43   | 60.5 | 35   | 104   | 37   | 40.5 | 28   | 58   | 60   |
| 9410 | 43.5 | 33   | 22   | 85.5  | 25   | 23   | 16.5 | 38   | 111  |
| 9411 | 26   | 23.5 | 17   | 68.5  | 20   | 20   | 14   | 26   | 36   |
| 9412 | 34   | 35   | 22   | 98    | 24   | 23.5 | 17   | 45   | 35.5 |
| 9413 | 25   | 16   | 16   | 63    | 23   | 18   | 11.5 | 21.5 | 24   |
| 9414 | 31   | 13.5 | 14   | 66    | 18   | 17   | 10   | 20   | 18   |
| 9415 | 43   | 44   | 31   | 90.5  | 33   | 35   | 25   | 49.5 | 61.5 |
| 9416 | 31.5 | 40   | 23.5 | 81    | 30   | 30.5 | 20   | 43   | 50   |
| 9417 | 34   | 10   | 11   | 58    | 15.5 | 15   | 8    | 16   | 15   |
| 9418 | 29   | 28   | 21   | 55    | 18.5 | 20.5 | 15   | 29   | 28   |
| 9419 | 27   | 15   | 15   | 59    | 18.5 | 15.5 | 11   | 22   | 19   |
| 9420 | 32   | 39.5 | 24   | 76.5  | 24   | 27   | 20   | 41   | 42   |
| 9421 | 33   | 27   | 16   | 81    | 25   | 19   | 15   | 29   | 44   |
| 9422 | 29   | 13   | 15   | 61    | 19   | 18.5 | 10   | 22   | 24   |
| 9423 | 64.5 | 61   | 34   | 94    | 34.5 | 49   | 28   | 60   | 74.5 |
| 9424 | 27   | 18   | 13   | 53.5  | 29   | 17   | 11   | 24   | 31   |
| 9425 | 54.5 | 51   | 27   | 83    | 27   | 35   | 23   | 56   | 74.5 |
| 9426 | 43   | 40   | 25   | 81.5  | 47   | 33   | 21   | 41   | 63   |
| 9427 | 39   | 46   | 39   | 93    | 52   | 29   | 24   | 45   | 48.5 |
| 9428 | 40   | 48   | 29   | 112.5 | 39   | 38.5 | 23.5 | 51   | 57   |
| 9429 | 33   | 39   | 23   | 80    | 30   | 28   | 19   | 43   | 50   |
| 9430 | 42   | 33   | 26   | 68.5  | 33.5 | 27.5 | 20   | 41.5 | 36   |
| 9431 | 32   | 33.5 | 24   | 92.5  | 22   | 32   | 18   | 50   | 35   |
| 9432 | 41   | 47   | 29   | 79    | 31.5 | 28   | 60.5 | 50   | 49.5 |
| 9433 | 53   | 79   | 40   | 107   | 35.5 | 50   | 35   | 71   | 82   |
| 9434 | 28   | 29   | 18   | 57    | 21.5 | 26   | 15   | 30   | 36   |
| 9435 | 30   | 38   | 23   | 73    | 22   | 25   | 17   | 37   | 46   |
| 9436 | 45.5 | 28   | 22   | 75.5  | 24   | 31   | 16   | 34   | 32   |
| 9437 | 47   | 58   | 30   | 88.5  | 32   | 38   | 22   | 55   | 56   |
| 9438 | 34   | 22   | 18   | 57    | 18   | 29.5 | 9    | 20   | 48   |
| 9439 | 29   | 14   | 14   | 71    | 20   | 19   | 10   | 20   | 21   |
| 9440 | 27   | 16   | 17   | 68    | 17   | 17   | 17   | 23   | 24.5 |
| 9441 | 29.5 | 15   | 14.5 | 72    | 17   | 19   | 12   | 24   | 18   |
| 9442 | 20.5 | 11   | 13   | 53    | 15   | 14   | 7    | 15   | 15   |
| 9443 | 36   | 20   | 26   | 99    | 24   | 21   | 14   | 29   | 64   |
| 9444 | 35.5 | 24   | 19   | 79    | 26   | 21   | 15   | 29   | 34   |
| 9445 | 22   | 11   | 12   | 53    | 16   | 13   | 6    | 13   | 19   |

|      |       |       |      |      |       |      |      |       |      |
|------|-------|-------|------|------|-------|------|------|-------|------|
| 9446 | 40    | 43    | 32   | 75   | 37    | 28.5 | 25.5 | 50    | 47   |
| 9447 | 33    | 36.5  | 26   | 78   | 30    | 26   | 17   | 36    | 46   |
| 9448 | 30    | 35    | 21   | 79   | 24    | 24   | 18   | 36    | 53   |
| 9449 | 33    | 24.5  | 14   | 55   | 34    | 16   | 30   | 28    | 20   |
| 9450 | 52    | 11    | 10   | 39   | 32    | 13   | 11   | 89    | 10   |
| 9451 | 24    | 18    | 18   | 62.5 | 27    | 15   | 16   | 16    | 19   |
| 9452 | 86.5  | 14    | 14   | 32   | 20.5  | 17   | 17   | 21    | 15   |
| 9453 | 37    | 13    | 10.5 | 37   | 16    | 17   | 9    | 21    | 12   |
| 9454 | 36.5  | 32    | 15   | 49   | 27    | 19.5 | 26   | 19    | 20   |
| 9455 | 26    | 13    | 12   | 42   | 17    | 17   | 12   | 65    | 21   |
| 9456 | 27    | 13    | 10   | 48   | 15    | 20   | 7    | 11    | 9.5  |
| 9457 | 29    | 17    | 11.5 | 51   | 22.5  | 21   | 14   | 17    | 17   |
| 9458 | 33    | 22    | 27   | 58.5 | 33    | 23   | 16   | 48    | 20   |
| 9459 | 183   | 42    | 57.5 | 192  | 288.5 | 51   | 44   | 154.5 | 48.5 |
| 9460 | 262.5 | 322.5 | 80.5 | 377  | 69    | 189  | 47.5 | 426   | 269  |
| 9461 | 68.5  | 20    | 22   | 37.5 | 26    | 29   | 12   | 22    | 16   |
| 9462 | 48.5  | 16    | 11   | 44   | 22    | 37   | 11   | 15    | 16   |
| 9463 | 43    | 23.5  | 23   | 63.5 | 42.5  | 28   | 20   | 40.5  | 49.5 |
| 9464 | 44    | 24    | 23   | 73.5 | 40    | 38   | 22   | 29    | 58   |
| 9465 | 41    | 23    | 36   | 91   | 36    | 26   | 22   | 34    | 27   |
| 9466 | 18    | 16    | 11   | 51   | 19    | 18   | 10.5 | 14    | 11   |
| 9467 | 21    | 16    | 10   | 48   | 19    | 18   | 10.5 | 12    | 11   |
| 9468 | 22    | 18    | 18   | 52.5 | 22    | 20   | 10   | 13    | 13   |
| 9469 | 19    | 14    | 10   | 42   | 16    | 19   | 9.5  | 12    | 11   |
| 9470 | 41    | 20    | 12   | 66   | 23    | 43   | 10   | 16    | 15.5 |
| 9471 | 19    | 16    | 13   | 43   | 20    | 20   | 9    | 13    | 11   |
| 9472 | 29.5  | 18    | 14   | 57   | 20    | 27   | 11   | 25    | 15   |
| 9473 | 23    | 14    | 11   | 52   | 19    | 31   | 12   | 78    | 11   |
| 9474 | 17    | 12    | 10   | 73   | 17    | 16   | 7.5  | 12.5  | 11   |
| 9475 | 16    | 13    | 10   | 42   | 16    | 17   | 9    | 13.5  | 9    |
| 9476 | 16    | 12    | 10   | 46   | 24    | 15   | 9    | 12    | 10   |
| 9477 | 17    | 13.5  | 9    | 31.5 | 18.5  | 18   | 8    | 16    | 10   |
| 9478 | 47    | 54    | 24   | 88.5 | 52.5  | 42   | 24   | 48    | 55   |
| 9479 | 52    | 44.5  | 30   | 85   | 28.5  | 40   | 22   | 50.5  | 44   |
| 9480 | 43    | 57.5  | 32   | 86   | 33    | 49.5 | 28   | 62    | 59   |
| 9481 | 35.5  | 52    | 27   | 76   | 33    | 28   | 22   | 48    | 43.5 |
| 9482 | 70    | 60    | 28.5 | 80   | 33    | 62   | 23   | 56    | 121  |
| 9483 | 36    | 74    | 53   | 88   | 56    | 39.5 | 35   | 74.5  | 78   |
| 9484 | 49    | 65    | 34   | 82   | 40    | 38.5 | 22   | 64    | 71   |
| 9485 | 50    | 80    | 40   | 105  | 48    | 47   | 33   | 77    | 75   |
| 9486 | 26    | 17    | 13   | 69   | 18    | 23.5 | 10   | 21    | 15   |
| 9487 | 54    | 52.5  | 38   | 97   | 41    | 44   | 35   | 68    | 55   |
| 9488 | 38    | 48    | 29   | 72.5 | 32    | 33   | 26   | 51    | 45   |
| 9489 | 44.5  | 60.5  | 33   | 99.5 | 35    | 46   | 30.5 | 57    | 71   |
| 9490 | 47    | 72.5  | 46   | 95   | 36    | 49.5 | 32   | 71.5  | 75.5 |
| 9491 | 40.5  | 13    | 14   | 61   | 20    | 21   | 10   | 18    | 19   |
| 9492 | 25    | 20    | 14   | 61   | 23    | 22   | 18   | 19    | 23   |

|      |      |       |      |       |      |      |      |      |      |
|------|------|-------|------|-------|------|------|------|------|------|
| 9493 | 25   | 21    | 16   | 70    | 21.5 | 21   | 10   | 21   | 26.5 |
| 9494 | 49   | 60    | 31   | 83.5  | 35   | 39   | 27   | 58.5 | 82   |
| 9495 | 34   | 17    | 14   | 69.5  | 18.5 | 30   | 11   | 18   | 16   |
| 9496 | 54.5 | 34.5  | 25   | 79    | 29   | 28.5 | 19.5 | 43   | 48   |
| 9497 | 46   | 45    | 27   | 83    | 30.5 | 37   | 25   | 43   | 45   |
| 9498 | 34   | 24    | 19   | 74    | 25   | 23.5 | 14   | 24   | 32   |
| 9499 | 52   | 51.5  | 31   | 116.5 | 42.5 | 39   | 27   | 59.5 | 56   |
| 9500 | 52   | 81    | 31.5 | 92    | 40.5 | 49   | 35.5 | 69.5 | 87   |
| 9501 | 31   | 27    | 20   | 68    | 23   | 21   | 14   | 30   | 29   |
| 9502 | 48.5 | 74    | 37   | 142.5 | 38   | 49   | 34   | 72   | 72   |
| 9503 | 43   | 56    | 32   | 93    | 29   | 38.5 | 26   | 59.5 | 68   |
| 9504 | 42   | 45.5  | 27   | 102   | 30   | 34   | 23   | 44   | 50   |
| 9505 | 32   | 33    | 20.5 | 97    | 23.5 | 28   | 17   | 33.5 | 44   |
| 9506 | 39   | 70    | 32   | 101   | 31   | 44   | 30   | 69   | 101  |
| 9507 | 13   | 13    | 21   | 30    | 15.5 | 14   | 9    | 12   | 8    |
| 9508 | 21   | 19    | 10   | 34    | 15   | 19   | 10   | 15   | 12   |
| 9509 | 23   | 19    | 18   | 53.5  | 18   | 19   | 15   | 20   | 31   |
| 9510 | 15   | 12    | 9    | 43    | 15.5 | 13.5 | 6    | 12   | 9    |
| 9511 | 22   | 16    | 12   | 51    | 18   | 17   | 11   | 17   | 34   |
| 9512 | 26   | 15    | 17   | 82.5  | 19   | 18.5 | 11   | 25   | 20.5 |
| 9513 | 25   | 19    | 16   | 67.5  | 20.5 | 20   | 11   | 22   | 44.5 |
| 9514 | 17   | 15    | 11   | 63    | 18   | 15   | 9    | 16   | 13   |
| 9515 | 20.5 | 13    | 13   | 57    | 21   | 16   | 10   | 15   | 12   |
| 9516 | 21   | 14    | 18   | 56.5  | 19   | 16   | 9    | 20   | 20   |
| 9517 | 34   | 13    | 15   | 66    | 30.5 | 17   | 10   | 24   | 33   |
| 9518 | 21   | 120.5 | 12   | 41    | 15   | 15   | 7    | 16   | 67   |
| 9519 | 31.5 | 14    | 15   | 104   | 20   | 18   | 13   | 43   | 14.5 |
| 9520 | 38   | 47.5  | 14.5 | 53    | 21   | 28.5 | 12   | 41   | 38.5 |
| 9521 | 33   | 19    | 16   | 72    | 70.5 | 30   | 20   | 21   | 43.5 |
| 9522 | 19   | 12    | 21.5 | 83    | 19.5 | 13   | 25   | 19   | 11   |
| 9523 | 20   | 11    | 9.5  | 50    | 16   | 14   | 8    | 12   | 12   |
| 9524 | 19   | 13    | 9    | 47    | 18   | 18   | 7    | 13   | 14   |
| 9525 | 24   | 12    | 15   | 61    | 51.5 | 16   | 30   | 17   | 21.5 |
| 9526 | 20   | 18    | 13   | 44    | 21   | 16   | 14   | 38   | 56   |
| 9527 | 16   | 10.5  | 8    | 44.5  | 16   | 13   | 8    | 21.5 | 8    |
| 9528 | 25.5 | 25    | 18.5 | 54    | 18   | 19   | 13   | 25   | 22   |
| 9529 | 12   | 10    | 5    | 16    | 13.5 | 14   | 11   | 11   | 7    |
| 9530 | 93   | 12    | 12   | 67    | 19   | 17   | 12   | 26   | 11   |
| 9531 | 23   | 21    | 14   | 33.5  | 40   | 26   | 11   | 14   | 16   |
| 9532 | 52   | 60    | 39   | 106   | 38.5 | 50   | 25   | 53   | 94   |
| 9533 | 66.5 | 82    | 45   | 118   | 50.5 | 60   | 42   | 70   | 75   |
| 9534 | 49   | 63    | 41   | 138.5 | 45   | 45.5 | 30   | 64.5 | 71   |
| 9535 | 53   | 60.5  | 35   | 105   | 43   | 52.5 | 30   | 53   | 66   |
| 9536 | 85   | 75    | 41.5 | 105   | 46   | 58.5 | 36   | 67.5 | 86   |
| 9537 | 77   | 29    | 23   | 60    | 28.5 | 66   | 12   | 22.5 | 37   |
| 9538 | 67   | 55    | 33   | 114   | 36   | 61   | 26   | 52   | 62.5 |
| 9539 | 33   | 23    | 16   | 58.5  | 23   | 31   | 12   | 19   | 73   |

|      |       |      |      |       |      |      |      |       |      |
|------|-------|------|------|-------|------|------|------|-------|------|
| 9540 | 42    | 56   | 31   | 92    | 31   | 39   | 25   | 50    | 56   |
| 9541 | 45    | 35   | 23   | 95    | 29   | 33   | 18   | 36    | 32   |
| 9542 | 278   | 43.5 | 30   | 74.5  | 32   | 73.5 | 22   | 38    | 38   |
| 9543 | 35    | 19   | 18   | 85    | 33   | 29   | 11   | 20.5  | 44.5 |
| 9544 | 49    | 62   | 34   | 86    | 41   | 49   | 30.5 | 59    | 76   |
| 9545 | 89    | 39   | 26.5 | 68.5  | 37   | 45   | 25   | 44    | 118  |
| 9546 | 49    | 78.5 | 39   | 98    | 35   | 52   | 29   | 65    | 109  |
| 9547 | 37.5  | 41   | 29   | 61    | 28   | 37   | 19   | 33    | 56   |
| 9548 | 35    | 38   | 24   | 75    | 26   | 32   | 17   | 37    | 51   |
| 9549 | 48    | 40   | 28   | 87    | 37   | 38   | 20.5 | 39    | 54   |
| 9550 | 42    | 33   | 24   | 67.5  | 32   | 31   | 19   | 32    | 36   |
| 9551 | 36.5  | 36   | 30.5 | 83    | 46   | 33   | 18   | 36    | 44   |
| 9552 | 42    | 47   | 29   | 66    | 33   | 39   | 23   | 44    | 82   |
| 9553 | 63    | 66   | 33.5 | 173   | 31   | 58   | 22   | 55    | 60   |
| 9554 | 56.5  | 31   | 23   | 74    | 33   | 35   | 27   | 34    | 36   |
| 9555 | 38.5  | 20   | 20   | 86    | 29   | 25   | 12   | 30    | 43   |
| 9556 | 82.5  | 56   | 30   | 89    | 40.5 | 72   | 22   | 45    | 52   |
| 9557 | 62    | 85   | 45   | 103   | 43   | 57   | 37   | 74    | 93   |
| 9558 | 54    | 76   | 36   | 100   | 49   | 55   | 30   | 59    | 83   |
| 9559 | 36.5  | 25   | 19   | 80    | 25   | 28   | 16   | 31.5  | 74.5 |
| 9560 | 39.5  | 23.5 | 23   | 71    | 34   | 31   | 16   | 29    | 45   |
| 9561 | 97    | 25   | 21   | 58    | 26   | 42   | 14   | 26.5  | 43.5 |
| 9562 | 89.5  | 41   | 26   | 66    | 52   | 67.5 | 18   | 31    | 71.5 |
| 9563 | 47    | 19   | 18   | 60    | 23   | 29.5 | 14.5 | 32    | 29   |
| 9564 | 52    | 64   | 39   | 94    | 43   | 47.5 | 31   | 71    | 69   |
| 9565 | 46    | 54   | 31   | 90    | 34.5 | 42.5 | 27   | 60    | 61   |
| 9566 | 53    | 88.5 | 54   | 106   | 39   | 51   | 32   | 65    | 111  |
| 9567 | 77    | 66   | 38   | 168.5 | 41   | 57.5 | 31   | 57    | 81   |
| 9568 | 28    | 16   | 19   | 68.5  | 20   | 23   | 10   | 25.5  | 27   |
| 9569 | 36    | 19   | 18.5 | 95    | 32   | 25   | 18   | 29    | 21   |
| 9570 | 32    | 19   | 18   | 91    | 32   | 23   | 16   | 22    | 21   |
| 9571 | 140.5 | 27   | 53   | 164.5 | 36   | 33   | 29   | 84.5  | 30.5 |
| 9572 | 20    | 14.5 | 9    | 39    | 19   | 19   | 8    | 12    | 14   |
| 9573 | 25.5  | 14   | 11.5 | 32    | 25   | 21   | 14   | 18    | 39   |
| 9574 | 24    | 16   | 10   | 35    | 28   | 22   | 10   | 18    | 14   |
| 9575 | 40.5  | 20   | 21   | 80    | 28   | 27   | 18   | 21    | 31   |
| 9576 | 25    | 14   | 14   | 40    | 25   | 20   | 11   | 14    | 18   |
| 9577 | 52.5  | 19   | 19   | 34    | 44   | 28   | 14   | 18    | 26   |
| 9578 | 71    | 20   | 17   | 48    | 38   | 25   | 15   | 116.5 | 19   |
| 9579 | 32.5  | 20   | 16   | 49    | 31.5 | 29   | 20.5 | 113   | 93   |
| 9580 | 48    | 42   | 19   | 60    | 27.5 | 48   | 15   | 28    | 44   |
| 9581 | 28    | 16   | 15   | 61    | 27   | 21   | 10   | 18    | 18.5 |
| 9582 | 45    | 22   | 24   | 74.5  | 48   | 29   | 15   | 51    | 176  |
| 9583 | 23    | 14   | 11   | 32    | 23   | 20   | 10   | 127   | 11   |
| 9584 | 25    | 13   | 18   | 39    | 18   | 20   | 7    | 11.5  | 11   |
| 9585 | 23    | 14   | 10   | 34    | 24   | 19   | 11   | 28    | 24   |
| 9586 | 23    | 12   | 9    | 51    | 23   | 17   | 7    | 14    | 11   |

|      |       |      |      |       |       |       |      |      |      |
|------|-------|------|------|-------|-------|-------|------|------|------|
| 9587 | 39    | 22   | 13   | 46    | 34    | 24    | 10   | 51   | 15   |
| 9588 | 23    | 13   | 10   | 38.5  | 25    | 18    | 8    | 12   | 12   |
| 9589 | 30    | 15   | 12   | 57    | 27    | 22    | 21   | 26   | 20   |
| 9590 | 30    | 15.5 | 14   | 30    | 31    | 20.5  | 12   | 21   | 22   |
| 9591 | 164   | 25   | 34   | 49    | 36    | 30    | 20   | 30   | 25   |
| 9592 | 43    | 17   | 20   | 32    | 31.5  | 23    | 15   | 17   | 16.5 |
| 9593 | 74    | 30   | 23   | 85    | 48    | 28    | 31   | 64   | 27.5 |
| 9594 | 30    | 15   | 12   | 37    | 30    | 20.5  | 14   | 76.5 | 25   |
| 9595 | 172   | 70   | 77   | 288   | 249   | 73    | 55   | 147  | 96   |
| 9596 | 30    | 18   | 13   | 33    | 32    | 25    | 12.5 | 98.5 | 15   |
| 9597 | 22    | 14   | 10   | 44    | 19    | 19    | 8    | 14   | 12   |
| 9598 | 22    | 13   | 10   | 38    | 21    | 19    | 10   | 12   | 13   |
| 9599 | 30.5  | 17   | 23   | 88    | 25    | 22    | 11   | 58.5 | 20   |
| 9600 | 47    | 18.5 | 13.5 | 70    | 25    | 22.5  | 18   | 24   | 15   |
| 9601 | 33    | 14   | 16   | 34    | 26.5  | 17.5  | 9    | 15   | 10   |
| 9602 | 25    | 18   | 12   | 52    | 22    | 18.5  | 9    | 15   | 16   |
| 9603 | 156.5 | 27   | 20   | 44    | 47    | 99.5  | 15   | 31   | 47   |
| 9604 | 29.5  | 15   | 15   | 71.5  | 56    | 20    | 19   | 25   | 22   |
| 9605 | 34    | 16   | 24   | 89.5  | 29    | 23    | 12   | 45   | 24   |
| 9606 | 20    | 15   | 11   | 18    | 23    | 18    | 10   | 13   | 10   |
| 9607 | 34    | 18   | 19   | 56.5  | 29    | 20    | 86   | 59   | 16   |
| 9608 | 57    | 14   | 12   | 61    | 26    | 31.5  | 9    | 35   | 17   |
| 9609 | 35    | 16   | 30   | 62    | 39    | 27    | 27   | 31   | 20.5 |
| 9610 | 187   | 169  | 54   | 227   | 47    | 101.5 | 332  | 142  | 136  |
| 9611 | 36    | 19   | 17   | 45.5  | 196.5 | 27    | 15   | 24   | 24   |
| 9612 | 14    | 11   | 6    | 11    | 8.5   | 15    | 6    | 8    | 7    |
| 9613 | 12    | 11   | 5    | 10    | 9     | 14    | 5    | 7    | 7    |
| 9614 | 28    | 13   | 14   | 76.5  | 23.5  | 22    | 17.5 | 21   | 14   |
| 9615 | 52.5  | 15   | 15   | 61    | 21    | 43    | 9    | 18   | 20   |
| 9616 | 29    | 13   | 11   | 89    | 23    | 18    | 22   | 21   | 16   |
| 9617 | 20.5  | 13   | 12   | 61.5  | 18.5  | 18    | 10   | 14   | 12   |
| 9618 | 34.5  | 20.5 | 22   | 281.5 | 29    | 27    | 21   | 43   | 16   |
| 9619 | 40    | 19   | 39   | 192   | 90    | 28    | 76.5 | 43   | 16   |
| 9620 | 23    | 15   | 25   | 86    | 28    | 19    | 65.5 | 22   | 50   |
| 9621 | 21.5  | 13   | 11   | 43    | 26.5  | 18    | 9    | 16   | 17   |
| 9622 | 31    | 15   | 18   | 93    | 27    | 19    | 11   | 30   | 26   |
| 9623 | 30.5  | 14   | 15   | 64    | 117   | 16.5  | 18   | 18   | 20   |
| 9624 | 144.5 | 60   | 107  | 360   | 52.5  | 63.5  | 35   | 273  | 79   |
| 9625 | 37    | 15   | 12   | 44.5  | 21    | 19.5  | 11   | 17   | 14   |
| 9626 | 45.5  | 36   | 45   | 94.5  | 32.5  | 29    | 28   | 39.5 | 56   |
| 9627 | 181   | 24   | 27   | 71    | 43    | 36.5  | 22   | 53   | 33   |
| 9628 | 35    | 14   | 18   | 58    | 26    | 17.5  | 19   | 18   | 17   |
| 9629 | 27    | 13   | 13   | 70    | 27    | 19    | 9    | 18   | 18   |
| 9630 | 23    | 13   | 28.5 | 76    | 22    | 19    | 10   | 25   | 16   |
| 9631 | 25    | 18   | 15   | 62    | 30    | 18    | 9    | 25   | 26   |
| 9632 | 29    | 16   | 19   | 43    | 25    | 17    | 10   | 30   | 34   |
| 9633 | 33.5  | 18   | 19   | 87    | 34    | 20    | 16   | 33   | 48   |

|      |      |      |      |      |      |      |      |      |      |
|------|------|------|------|------|------|------|------|------|------|
| 9634 | 59.5 | 15   | 13   | 33   | 24   | 33.5 | 10   | 16   | 27   |
| 9635 | 34   | 24   | 31   | 39   | 28   | 29   | 10   | 22   | 18   |
| 9636 | 60   | 18   | 14   | 38   | 27   | 24   | 14   | 20.5 | 18   |
| 9637 | 61   | 26   | 36   | 94   | 51   | 33   | 34   | 47   | 30   |
| 9638 | 53   | 28   | 22   | 66   | 28   | 24   | 20   | 48   | 36   |
| 9639 | 27   | 21   | 23   | 47   | 24   | 22   | 12   | 23   | 23   |
| 9640 | 37   | 15   | 14   | 69   | 23   | 20   | 9    | 23   | 32   |
| 9641 | 36   | 15.5 | 13   | 77   | 17   | 19   | 10   | 19   | 20   |
| 9642 | 41.5 | 34   | 24   | 59.5 | 29   | 30   | 20   | 36   | 45   |
| 9643 | 35   | 25   | 19   | 62   | 153  | 26   | 13   | 28   | 29   |
| 9644 | 36   | 52   | 31   | 80.5 | 29   | 31   | 38.5 | 53   | 46.5 |
| 9645 | 27   | 17   | 15   | 52   | 23.5 | 23   | 10   | 23   | 16   |
| 9646 | 34   | 48   | 26   | 84   | 29   | 33.5 | 22   | 46   | 47   |
| 9647 | 34   | 37   | 22   | 68   | 25.5 | 31   | 19   | 37   | 40.5 |
| 9648 | 28   | 18   | 18   | 60   | 22   | 21   | 23   | 26   | 48   |
| 9649 | 31   | 15   | 16   | 52   | 22   | 19   | 9    | 27   | 31   |
| 9650 | 22   | 12   | 11   | 62   | 17.5 | 14   | 8.5  | 16   | 49   |
| 9651 | 25   | 12   | 14   | 51   | 20.5 | 16   | 15   | 17   | 33   |
| 9652 | 35   | 30   | 19   | 68   | 29   | 25   | 16   | 33   | 45   |
| 9653 | 25   | 13   | 11   | 51   | 22   | 17   | 10   | 15   | 37   |
| 9654 | 34.5 | 28   | 17   | 66   | 26   | 26   | 15   | 33   | 25   |
| 9655 | 35   | 16   | 17   | 63   | 21   | 28   | 11   | 19   | 30   |
| 9656 | 29   | 25   | 21   | 67   | 22   | 22.5 | 14   | 29   | 43   |
| 9657 | 33   | 28   | 18   | 81   | 23   | 23   | 14   | 28   | 36   |
| 9658 | 59   | 34   | 30   | 77   | 36   | 58.5 | 10   | 22   | 52   |
| 9659 | 19   | 11   | 13   | 43   | 17.5 | 12   | 8    | 16   | 10   |
| 9660 | 322  | 40   | 21   | 91.5 | 28.5 | 108  | 13   | 24   | 50   |
| 9661 | 79   | 25   | 14.5 | 49   | 21   | 71   | 18   | 17.5 | 33.5 |
| 9662 | 79   | 38   | 22   | 79.5 | 35   | 64   | 15   | 37   | 37   |
| 9663 | 39   | 15   | 17   | 51   | 26   | 17   | 11   | 25   | 23   |
| 9664 | 44   | 38   | 23   | 79   | 29   | 34   | 24   | 44   | 45   |
| 9665 | 23   | 13   | 13   | 56   | 19   | 19   | 9    | 17   | 21   |
| 9666 | 44   | 57   | 34   | 77   | 77   | 39   | 27   | 74   | 64   |
| 9667 | 45.5 | 45   | 27   | 70.5 | 27   | 31   | 21   | 41   | 65.5 |
| 9668 | 22.5 | 13   | 16   | 66   | 88   | 16   | 11   | 19   | 47   |
| 9669 | 34   | 18   | 15   | 60.5 | 22   | 26.5 | 10   | 17   | 26   |
| 9670 | 40   | 30   | 34   | 85   | 27   | 26.5 | 21.5 | 36   | 41   |
| 9671 | 28   | 29   | 18   | 51   | 20   | 23   | 17.5 | 30   | 35   |
| 9672 | 30   | 18.5 | 18   | 76   | 22   | 21.5 | 11   | 25   | 17   |
| 9673 | 23.5 | 12   | 13   | 60   | 18   | 16   | 8    | 17   | 67   |
| 9674 | 27   | 26   | 24   | 80   | 23   | 22   | 14   | 30   | 34   |
| 9675 | 53   | 24   | 16   | 63   | 18   | 53   | 11   | 30.5 | 36   |
| 9676 | 51.5 | 69.5 | 41   | 105  | 35   | 43   | 31   | 82   | 93   |
| 9677 | 41   | 12   | 13   | 70   | 23   | 16   | 10   | 40   | 45   |
| 9678 | 40   | 46   | 26   | 90.5 | 30.5 | 35   | 22   | 45   | 54   |
| 9679 | 24   | 15   | 14   | 58   | 16   | 17.5 | 10   | 19   | 16.5 |
| 9680 | 32   | 37   | 22   | 72   | 23.5 | 28.5 | 15   | 37   | 47   |



|      |       |      |      |       |       |      |      |      |      |
|------|-------|------|------|-------|-------|------|------|------|------|
| 9681 | 21.5  | 13   | 10   | 37.5  | 16    | 17   | 13   | 14   | 18   |
| 9682 | 26    | 18   | 17   | 68    | 25    | 23   | 17.5 | 59   | 67   |
| 9683 | 22    | 11   | 13   | 61    | 23    | 16   | 22   | 17   | 14   |
| 9684 | 38    | 37   | 30   | 95    | 31    | 31.5 | 24   | 43   | 49   |
| 9685 | 54    | 49   | 33   | 90    | 35    | 45   | 25   | 51   | 56   |
| 9686 | 32    | 14   | 20   | 53    | 39    | 19   | 12   | 26.5 | 20   |
| 9687 | 25    | 10   | 12   | 42.5  | 17    | 14.5 | 9    | 19   | 18   |
| 9688 | 57    | 50   | 79   | 115.5 | 53.5  | 34.5 | 28   | 73   | 69   |
| 9689 | 49    | 13   | 15   | 70.5  | 19    | 16   | 11   | 23.5 | 19   |
| 9690 | 41.5  | 57   | 30   | 154.5 | 32    | 36   | 22   | 51   | 60.5 |
| 9691 | 28    | 14   | 14   | 43    | 21    | 19   | 8.5  | 19   | 14   |
| 9692 | 24    | 11   | 14   | 77    | 17    | 16   | 9.5  | 22.5 | 31   |
| 9693 | 22    | 16   | 15   | 74.5  | 30    | 18   | 11   | 20   | 25   |
| 9694 | 31    | 17   | 13   | 27    | 24.5  | 20   | 11   | 18   | 28   |
| 9695 | 41.5  | 22   | 25   | 66.5  | 32.5  | 34   | 16   | 35.5 | 21   |
| 9696 | 32    | 13.5 | 14   | 38    | 35    | 17   | 9    | 17   | 48   |
| 9697 | 16    | 13   | 9    | 36    | 29    | 17   | 8    | 11   | 10   |
| 9698 | 41    | 15   | 19   | 56    | 40    | 20   | 12   | 19   | 20   |
| 9699 | 80.5  | 33   | 12   | 22    | 37    | 81.5 | 16   | 16   | 19   |
| 9700 | 45.5  | 15   | 11   | 24    | 31    | 18   | 11   | 17   | 12   |
| 9701 | 31.5  | 13   | 11   | 19    | 27.5  | 16   | 8    | 12   | 16   |
| 9702 | 23    | 14   | 9    | 46    | 23    | 18   | 19   | 36   | 11   |
| 9703 | 30    | 13   | 12   | 52.5  | 24    | 16   | 9    | 40   | 14   |
| 9704 | 860   | 17   | 18   | 131   | 32.5  | 23   | 13   | 30   | 59   |
| 9705 | 245.5 | 19   | 34   | 66    | 34.5  | 27   | 22   | 27   | 20   |
| 9706 | 21    | 12   | 13   | 51    | 30.5  | 14   | 14   | 18.5 | 9    |
| 9707 | 16    | 10   | 8    | 39    | 27    | 15   | 6    | 9    | 13   |
| 9708 | 28    | 10   | 8    | 34.5  | 20    | 14   | 7    | 11   | 13   |
| 9709 | 35    | 13   | 11   | 97    | 89    | 16   | 16   | 40   | 10   |
| 9710 | 15    | 10   | 8    | 41.5  | 28    | 14   | 6    | 11   | 7    |
| 9711 | 99    | 19   | 24   | 85.5  | 211.5 | 28   | 15   | 38   | 19   |
| 9712 | 40    | 15   | 13   | 42    | 38    | 18   | 12   | 33   | 14   |
| 9713 | 29    | 13   | 10   | 40    | 30    | 16   | 9    | 21   | 11   |
| 9714 | 24    | 13   | 19.5 | 51    | 30    | 16.5 | 23   | 84   | 13   |
| 9715 | 20    | 11   | 9    | 35    | 21.5  | 13.5 | 6.5  | 11   | 8    |
| 9716 | 16    | 10   | 6    | 38    | 27    | 15   | 6    | 11   | 7    |
| 9717 | 15.5  | 10   | 9    | 35    | 19    | 13   | 7    | 43   | 9    |
| 9718 | 31    | 29   | 21   | 67    | 26.5  | 22   | 20   | 38   | 44   |
| 9719 | 26    | 31   | 20   | 76    | 34    | 26.5 | 15   | 47   | 43   |
| 9720 | 21    | 13   | 14   | 60    | 21    | 16   | 9    | 28   | 38.5 |
| 9721 | 25.5  | 17   | 14   | 60    | 25.5  | 18   | 10   | 22   | 22   |
| 9722 | 29    | 31   | 21   | 84    | 29    | 24   | 17   | 35   | 49   |
| 9723 | 24    | 19   | 14   | 52    | 21.5  | 21.5 | 10   | 19   | 41   |
| 9724 | 50    | 55   | 27   | 81    | 30    | 43   | 22   | 47   | 52   |
| 9725 | 36    | 36   | 23.5 | 72    | 25    | 27   | 19   | 44   | 38   |
| 9726 | 34    | 67   | 28   | 81    | 33    | 34   | 24   | 62   | 65   |
| 9727 | 34.5  | 50   | 26   | 89    | 42    | 33   | 27   | 47.5 | 55   |

|      |      |      |      |      |      |      |      |      |      |
|------|------|------|------|------|------|------|------|------|------|
| 9728 | 37   | 43   | 28   | 86   | 39   | 31   | 24   | 42   | 85   |
| 9729 | 34   | 54.5 | 28   | 101  | 31   | 32.5 | 22   | 56   | 59   |
| 9730 | 29   | 12   | 14   | 61.5 | 25.5 | 16   | 8    | 23   | 18   |
| 9731 | 52   | 46   | 23   | 111  | 26   | 45.5 | 13   | 36   | 44   |
| 9732 | 27   | 39.5 | 22   | 62   | 24   | 28   | 16   | 39   | 43   |
| 9733 | 30   | 22   | 16   | 58   | 24.5 | 32   | 10   | 21   | 33   |
| 9734 | 22.5 | 25   | 18.5 | 59   | 24   | 18   | 13   | 28   | 38   |
| 9735 | 17   | 13   | 11   | 51   | 20   | 16   | 8    | 17   | 15   |
| 9736 | 36   | 22   | 22   | 73   | 38   | 18   | 13   | 53   | 26   |
| 9737 | 18   | 12   | 13   | 65.5 | 23.5 | 14   | 8    | 16   | 23   |
| 9738 | 23   | 27   | 16   | 49.5 | 22.5 | 18   | 11   | 25   | 23   |
| 9739 | 44   | 55.5 | 27   | 85   | 31.5 | 45   | 22   | 60   | 54   |
| 9740 | 35   | 53   | 27   | 76   | 34   | 34.5 | 24   | 49   | 76   |
| 9741 | 25.5 | 18   | 19   | 69   | 33   | 16   | 11   | 22   | 35   |
| 9742 | 26   | 31   | 24   | 72   | 25.5 | 25   | 17   | 34   | 34   |
| 9743 | 29.5 | 29   | 19.5 | 98.5 | 24   | 22.5 | 15   | 41   | 33   |
| 9744 | 28   | 30   | 21   | 71   | 26.5 | 24   | 16   | 32   | 54   |
| 9745 | 16   | 11   | 10   | 43   | 18   | 13   | 7    | 16   | 14   |
| 9746 | 27.5 | 39   | 21   | 63   | 27.5 | 26   | 16.5 | 35   | 35   |
| 9747 | 41   | 56   | 32   | 95.5 | 43   | 38   | 30   | 64   | 68.5 |
| 9748 | 44   | 37   | 20   | 89   | 25   | 39   | 13   | 34   | 32   |
| 9749 | 19.5 | 14   | 12   | 59   | 23   | 15   | 9    | 20   | 21   |
| 9750 | 26   | 37   | 23   | 87   | 29   | 24   | 18   | 39   | 46.5 |
| 9751 | 102  | 37.5 | 19   | 94   | 24.5 | 63   | 14   | 30   | 63   |
| 9752 | 31   | 33   | 24   | 76   | 25   | 27.5 | 18   | 37   | 38   |
| 9753 | 44   | 30   | 21   | 74   | 33   | 26   | 15.5 | 39   | 51.5 |
| 9754 | 45.5 | 60   | 33   | 91.5 | 36.5 | 36   | 27   | 57   | 61   |
| 9755 | 35   | 35.5 | 25.5 | 83.5 | 33   | 30   | 20   | 48   | 40   |
| 9756 | 63.5 | 59   | 35.5 | 105  | 36   | 40   | 29   | 80   | 61   |
| 9757 | 23   | 34   | 29   | 63   | 26   | 24   | 15   | 36   | 32   |
| 9758 | 26   | 21   | 13   | 52   | 21   | 24   | 11   | 23.5 | 29   |
| 9759 | 25   | 30   | 19   | 64   | 25   | 23   | 16   | 33.5 | 32   |
| 9760 | 35   | 64   | 29   | 74   | 35   | 35   | 27   | 60   | 62   |
| 9761 | 31   | 44   | 26   | 78   | 26   | 27   | 18   | 53   | 38.5 |
| 9762 | 17   | 12   | 12   | 41   | 20   | 14   | 7    | 16   | 25.5 |
| 9763 | 31   | 38   | 25   | 79   | 29.5 | 26   | 19   | 42   | 60   |
| 9764 | 25   | 35.5 | 25.5 | 70   | 27   | 24   | 16   | 37   | 38   |
| 9765 | 34   | 38   | 27   | 87.5 | 35   | 27.5 | 21.5 | 48   | 47   |
| 9766 | 45   | 40   | 22   | 88   | 33.5 | 39   | 15   | 41   | 47   |
| 9767 | 28.5 | 27   | 17   | 82   | 25   | 25   | 12   | 25   | 45   |
| 9768 | 17   | 10   | 10   | 64.5 | 26.5 | 12   | 8    | 14   | 18   |
| 9769 | 58.5 | 11   | 9    | 49   | 18   | 20   | 8    | 26   | 20.5 |
| 9770 | 26   | 14   | 14   | 56   | 21   | 15   | 10   | 18.5 | 17   |
| 9771 | 18   | 10   | 12   | 78   | 21   | 12   | 9    | 16   | 18   |
| 9772 | 19   | 10   | 13   | 67.5 | 70   | 13   | 7    | 17   | 41   |
| 9773 | 21   | 15   | 15   | 63   | 23   | 18   | 10   | 21   | 24   |
| 9774 | 26.5 | 37   | 19   | 73   | 27   | 25   | 17   | 35   | 43   |

|      |      |      |      |       |      |      |      |      |       |
|------|------|------|------|-------|------|------|------|------|-------|
| 9775 | 37   | 46   | 26.5 | 134   | 30   | 33   | 19   | 71.5 | 42    |
| 9776 | 28   | 33   | 23   | 77    | 29.5 | 26   | 17   | 30.5 | 39    |
| 9777 | 29   | 18   | 16.5 | 63    | 30   | 23   | 11   | 26   | 17.5  |
| 9778 | 21   | 17   | 15   | 71.5  | 19.5 | 20   | 9    | 18   | 21    |
| 9779 | 58   | 70   | 43.5 | 100   | 38   | 59   | 28   | 57   | 69    |
| 9780 | 37   | 36   | 23   | 82    | 62   | 32.5 | 16   | 34   | 41    |
| 9781 | 20   | 17   | 13   | 56    | 21   | 21   | 8    | 21   | 15    |
| 9782 | 33   | 28   | 21   | 76    | 26   | 29   | 15   | 32   | 29    |
| 9783 | 35.5 | 33   | 42   | 105   | 32   | 32   | 15   | 33   | 54    |
| 9784 | 28   | 17   | 16   | 110.5 | 21   | 23   | 9    | 24   | 13    |
| 9785 | 18   | 14   | 9    | 31.5  | 24   | 19   | 7    | 11   | 11    |
| 9786 | 32   | 15   | 11   | 62    | 33   | 21.5 | 25   | 23   | 12    |
| 9787 | 39   | 14   | 10   | 62    | 26   | 20   | 7.5  | 14   | 11    |
| 9788 | 20   | 16   | 11   | 52    | 26   | 20   | 11   | 32   | 15.5  |
| 9789 | 22   | 16   | 11   | 45    | 22   | 19   | 9    | 16   | 10    |
| 9790 | 21   | 16   | 11   | 38.5  | 30   | 19   | 18   | 14   | 12    |
| 9791 | 28   | 14   | 11   | 69    | 22   | 19.5 | 12.5 | 33   | 13    |
| 9792 | 37   | 18   | 15   | 66    | 35   | 22   | 15   | 142  | 36    |
| 9793 | 33   | 17   | 13   | 38.5  | 29   | 22   | 10   | 22   | 103.5 |
| 9794 | 37   | 13   | 13   | 56    | 34   | 20   | 18   | 20   | 15    |
| 9795 | 45   | 20   | 26   | 68    | 55   | 30   | 57.5 | 34   | 48    |
| 9796 | 43   | 17   | 17   | 70    | 28   | 27   | 11   | 61.5 | 39    |
| 9797 | 27.5 | 17   | 14   | 60    | 27   | 21   | 13   | 20   | 746   |
| 9798 | 54   | 20   | 15.5 | 99    | 1633 | 23   | 71   | 25   | 75    |
| 9799 | 31.5 | 21   | 18   | 48.5  | 132  | 29   | 17.5 | 27.5 | 23    |
| 9800 | 29.5 | 15   | 17   | 57.5  | 135  | 21   | 18.5 | 19   | 14    |
| 9801 | 63   | 24   | 19   | 110   | 37   | 55   | 19.5 | 58   | 21    |
| 9802 | 30   | 13   | 16   | 110   | 29   | 20   | 10   | 35   | 27    |
| 9803 | 22   | 18   | 10   | 37.5  | 25.5 | 17   | 9    | 11   | 13    |
| 9804 | 17.5 | 12   | 10   | 57    | 19   | 15   | 8    | 12   | 9     |
| 9805 | 22   | 13   | 12   | 62    | 30   | 17.5 | 10   | 16   | 12    |
| 9806 | 24   | 19   | 21   | 41.5  | 26   | 25   | 10   | 24   | 13    |
| 9807 | 72   | 64.5 | 53   | 123   | 32   | 60   | 29   | 63   | 63    |
| 9808 | 41   | 35   | 24   | 93.5  | 52.5 | 37.5 | 19   | 37   | 37    |
| 9809 | 62.5 | 85.5 | 47   | 121   | 54   | 58   | 41   | 77   | 90    |
| 9810 | 50   | 54   | 28   | 118   | 35   | 50   | 22   | 46   | 66.5  |
| 9811 | 71   | 33   | 33   | 66    | 29   | 41   | 12.5 | 25   | 34    |
| 9812 | 45   | 33   | 23   | 90    | 27   | 33   | 12   | 27   | 40    |
| 9813 | 33   | 17   | 14   | 68    | 56   | 21.5 | 9.5  | 21   | 22    |
| 9814 | 30   | 21.5 | 13   | 79    | 29   | 27   | 9    | 22   | 30    |
| 9815 | 50.5 | 49   | 30   | 88    | 37.5 | 45   | 21   | 44   | 77    |
| 9816 | 36.5 | 25   | 20   | 110   | 27   | 31   | 14   | 30   | 56    |
| 9817 | 42   | 40   | 22.5 | 97.5  | 30   | 39.5 | 18   | 37   | 48    |
| 9818 | 35   | 26   | 21   | 69    | 29   | 30   | 12   | 31   | 37    |
| 9819 | 38   | 27   | 17   | 63    | 24   | 38   | 11   | 27   | 28    |
| 9820 | 69.5 | 39   | 28   | 108   | 42   | 43   | 32   | 56   | 44    |
| 9821 | 28   | 20   | 14   | 65    | 22   | 25   | 10   | 24   | 66    |

|      |       |      |      |       |       |      |      |       |       |
|------|-------|------|------|-------|-------|------|------|-------|-------|
| 9822 | 39    | 49   | 25   | 75    | 28    | 34   | 21   | 42    | 36.5  |
| 9823 | 32    | 21   | 18   | 83    | 24.5  | 27   | 9    | 20    | 21    |
| 9824 | 50.5  | 28   | 20   | 81    | 23    | 36   | 16   | 34    | 37.5  |
| 9825 | 37.5  | 28   | 17   | 61.5  | 25.5  | 34   | 12   | 26    | 44    |
| 9826 | 38    | 22   | 24   | 70    | 24.5  | 34   | 11   | 22    | 25    |
| 9827 | 45    | 17.5 | 14   | 99    | 20.5  | 28   | 10   | 32    | 36    |
| 9828 | 62    | 21.5 | 16   | 68    | 51    | 25   | 13   | 34    | 35    |
| 9829 | 46    | 69   | 44   | 104   | 87    | 46   | 32   | 62    | 71    |
| 9830 | 43    | 33   | 24   | 80    | 27    | 34   | 19   | 44    | 57    |
| 9831 | 53    | 44   | 26   | 89    | 46    | 36   | 15   | 32    | 55    |
| 9832 | 35    | 29   | 18   | 72    | 36.5  | 32   | 18   | 27    | 45    |
| 9833 | 45    | 35   | 28   | 76    | 30    | 36   | 20   | 36    | 128.5 |
| 9834 | 33    | 19   | 13   | 60    | 59    | 24   | 10   | 19    | 22    |
| 9835 | 45.5  | 52   | 28   | 91    | 38    | 39   | 23   | 51    | 84    |
| 9836 | 80    | 30   | 17   | 80    | 23    | 73   | 12   | 28    | 40    |
| 9837 | 65    | 40   | 27.5 | 98.5  | 39    | 47   | 39   | 41    | 48    |
| 9838 | 30    | 19   | 16   | 82    | 42    | 25   | 11   | 21    | 26    |
| 9839 | 48    | 51.5 | 33   | 102   | 32    | 44   | 22   | 49    | 67    |
| 9840 | 31    | 19   | 14   | 49    | 22    | 27.5 | 9    | 16    | 25    |
| 9841 | 33.5  | 16   | 14   | 110   | 32    | 21   | 8    | 22.5  | 22    |
| 9842 | 42.5  | 51   | 38   | 95    | 36    | 43   | 30   | 57    | 65    |
| 9843 | 56    | 43   | 34   | 100   | 53    | 42   | 27   | 56    | 80    |
| 9844 | 43.5  | 41   | 29   | 104   | 39    | 37   | 22   | 50    | 61    |
| 9845 | 76    | 89.5 | 51   | 132   | 40    | 63   | 48.5 | 91    | 87    |
| 9846 | 80    | 61   | 29   | 93.5  | 30.5  | 46   | 25   | 50    | 55    |
| 9847 | 54    | 71   | 33   | 112   | 32    | 51   | 28   | 68    | 70    |
| 9848 | 31    | 20.5 | 23   | 92.5  | 24    | 28   | 11   | 27    | 49    |
| 9849 | 41    | 30   | 23   | 112.5 | 25    | 29   | 14   | 34    | 117   |
| 9850 | 32.5  | 21   | 18   | 88.5  | 45.5  | 23   | 16   | 25    | 92.5  |
| 9851 | 54    | 63.5 | 33   | 97    | 28.5  | 45   | 24   | 66    | 77    |
| 9852 | 35    | 20   | 20   | 89    | 28    | 26.5 | 12   | 24    | 18    |
| 9853 | 59    | 63   | 36   | 130   | 35    | 49   | 27   | 63    | 109   |
| 9854 | 36    | 26   | 18   | 122.5 | 28    | 31   | 22.5 | 25.5  | 24    |
| 9855 | 111   | 34   | 99   | 214   | 51    | 48   | 189  | 147   | 34    |
| 9856 | 18    | 12.5 | 9    | 66    | 22    | 16   | 10   | 14.5  | 24    |
| 9857 | 22    | 13   | 10   | 71    | 27    | 18.5 | 21   | 18    | 10    |
| 9858 | 238   | 26   | 15   | 51    | 39    | 31   | 21   | 175.5 | 20    |
| 9859 | 24    | 15   | 8    | 51    | 20    | 21   | 8    | 14    | 9     |
| 9860 | 105.5 | 31.5 | 28   | 71    | 61    | 45   | 55   | 64.5  | 31    |
| 9861 | 85.5  | 27   | 23   | 93    | 133.5 | 37.5 | 24   | 185   | 46    |
| 9862 | 45.5  | 17   | 14   | 33    | 27    | 25   | 12   | 16    | 15    |
| 9863 | 33.5  | 16   | 15   | 95    | 27.5  | 22   | 10   | 25    | 33    |
| 9864 | 61.5  | 25   | 30.5 | 127   | 29    | 37   | 19   | 41    | 64    |
| 9865 | 36    | 19   | 18   | 94    | 38.5  | 25   | 15   | 58    | 26    |
| 9866 | 39    | 19   | 14   | 33    | 35    | 29   | 12.5 | 48    | 17    |
| 9867 | 70.5  | 20   | 18   | 36    | 75.5  | 29   | 20   | 44    | 19    |
| 9868 | 37    | 21   | 22   | 90.5  | 190.5 | 27   | 13   | 37    | 26    |

|      |      |      |      |       |      |      |      |      |     |
|------|------|------|------|-------|------|------|------|------|-----|
| 9869 | 75   | 15   | 13   | 42    | 33   | 25   | 34.5 | 67   | 16  |
| 9870 | 38   | 11   | 10   | 43    | 25   | 18   | 13   | 18   | 12  |
| 9871 | 53   | 17   | 16   | 43.5  | 30   | 28   | 13   | 31   | 27  |
| 9872 | 32.5 | 15   | 17   | 52    | 18   | 21   | 8    | 20   | 12  |
| 9873 | 26   | 15.5 | 10   | 84.5  | 19   | 24.5 | 10   | 14   | 58  |
| 9874 | 23.5 | 15   | 9    | 36    | 18   | 23   | 6    | 13   | 13  |
| 9875 | 22   | 18   | 10   | 36    | 24   | 26   | 8    | 15   | 16  |
| 9876 | 22   | 15   | 8.5  | 52    | 23   | 21   | 8    | 13   | 27  |
| 9877 | 30   | 12   | 10   | 29    | 20   | 16   | 9    | 15   | 15  |
| 9878 | 70   | 16   | 15   | 54.5  | 36   | 31   | 14   | 20   | 36  |
| 9879 | 69.5 | 17   | 12   | 47    | 24   | 26   | 10   | 44   | 20  |
| 9880 | 32   | 14   | 12   | 30    | 75   | 19   | 13   | 19   | 15  |
| 9881 | 31   | 12   | 12   | 33    | 26   | 20   | 10   | 17   | 14  |
| 9882 | 1799 | 87   | 50   | 169   | 43.5 | 864  | 26   | 47.5 | 164 |
| 9883 | 22   | 12   | 10   | 40    | 25   | 19   | 8    | 24.5 | 22  |
| 9884 | 70   | 103  | 33   | 97    | 50.5 | 78   | 28   | 93   | 75  |
| 9885 | 76.5 | 26   | 27   | 56    | 43   | 29   | 51   | 48.5 | 28  |
| 9886 | 24   | 13   | 11   | 69    | 21.5 | 16   | 9    | 14   | 14  |
| 9887 | 30   | 15   | 19   | 85.5  | 119  | 23   | 13   | 26   | 21  |
| 9888 | 18   | 14   | 11   | 96    | 18   | 14   | 7    | 15   | 21  |
| 9889 | 23   | 11   | 13   | 127   | 21   | 17   | 7    | 18   | 10  |
| 9890 | 24   | 18   | 16   | 36    | 28.5 | 20   | 8    | 22   | 11  |
| 9891 | 68   | 18   | 13   | 40    | 25.5 | 27   | 13   | 69   | 26  |
| 9892 | 41.5 | 15   | 14   | 53.5  | 25   | 21   | 14   | 17   | 16  |
| 9893 | 23.5 | 12   | 14   | 38    | 153  | 18.5 | 11   | 18   | 74  |
| 9894 | 19   | 12   | 11   | 41.5  | 58   | 15   | 6    | 37   | 25  |
| 9895 | 52.5 | 10   | 15   | 169   | 19   | 16   | 9    | 103  | 70  |
| 9896 | 62   | 17   | 21   | 34    | 30   | 29   | 15   | 63.5 | 17  |
| 9897 | 18.5 | 13   | 27.5 | 29    | 17.5 | 18   | 7    | 17   | 8   |
| 9898 | 70   | 25.5 | 19.5 | 44    | 58.5 | 38   | 20   | 19   | 33  |
| 9899 | 22   | 12   | 9    | 55    | 16   | 17   | 7    | 14   | 15  |
| 9900 | 44   | 59   | 31   | 131.5 | 32.5 | 39   | 25   | 64   | 66  |
| 9901 | 51   | 78   | 38   | 104   | 42   | 52   | 34   | 77   | 92  |
| 9902 | 33   | 44   | 21   | 80    | 29.5 | 30   | 21   | 47.5 | 47  |
| 9903 | 17   | 9    | 11   | 60    | 18   | 10   | 8    | 15   | 15  |
| 9904 | 28   | 14.5 | 12.5 | 72    | 33   | 18   | 8    | 21   | 17  |
| 9905 | 30   | 20   | 12.5 | 53    | 26.5 | 17.5 | 9.5  | 28.5 | 22  |
| 9906 | 43   | 41   | 29   | 78    | 34   | 37   | 21   | 41   | 52  |
| 9907 | 36.5 | 47   | 24   | 92    | 26   | 36.5 | 20   | 46   | 55  |
| 9908 | 30   | 19   | 16   | 71    | 23   | 17   | 10.5 | 30.5 | 16  |
| 9909 | 59.5 | 71   | 36   | 122   | 37.5 | 39   | 39   | 73   | 90  |
| 9910 | 26.5 | 18   | 12   | 48.5  | 21   | 17   | 10   | 26   | 18  |
| 9911 | 40   | 24   | 15   | 66    | 22   | 28   | 13   | 29   | 25  |
| 9912 | 48   | 69   | 36   | 93    | 35   | 43   | 30   | 67   | 70  |
| 9913 | 39   | 56   | 28   | 86    | 30   | 36   | 30   | 58.5 | 55  |
| 9914 | 32   | 14   | 11   | 66    | 31   | 23   | 8    | 18   | 18  |
| 9915 | 38.5 | 50   | 29   | 111   | 31.5 | 36   | 24   | 52   | 61  |

|      |      |      |      |      |       |      |      |      |      |
|------|------|------|------|------|-------|------|------|------|------|
| 9916 | 40   | 38   | 23   | 82   | 22    | 34   | 15   | 47   | 62   |
| 9917 | 51   | 44   | 27   | 90.5 | 39.5  | 35   | 30   | 48   | 57   |
| 9918 | 39   | 48   | 30   | 90.5 | 29    | 33.5 | 22   | 47   | 58.5 |
| 9919 | 40   | 31   | 23   | 89   | 25    | 26   | 61   | 36.5 | 39   |
| 9920 | 33   | 38   | 21   | 67   | 28    | 24   | 17   | 40   | 47   |
| 9921 | 37   | 45   | 29   | 78   | 28    | 32   | 24   | 47   | 50   |
| 9922 | 22.5 | 13   | 18   | 74.5 | 22    | 12   | 10   | 22   | 39   |
| 9923 | 38   | 38   | 25   | 63   | 32    | 28   | 17   | 46   | 35   |
| 9924 | 34   | 29   | 22   | 70   | 23.5  | 30   | 17   | 31.5 | 37   |
| 9925 | 33   | 40   | 23   | 74   | 27    | 30   | 19   | 42   | 38.5 |
| 9926 | 78   | 41.5 | 21   | 90.5 | 26    | 68.5 | 15   | 34.5 | 59   |
| 9927 | 24   | 15   | 15   | 70   | 29    | 16   | 10   | 22   | 29   |
| 9928 | 21   | 17   | 12   | 46   | 19    | 17   | 10   | 25   | 36   |
| 9929 | 41   | 48   | 27   | 83   | 25    | 32.5 | 41   | 46   | 48   |
| 9930 | 40   | 57   | 39   | 100  | 30    | 38   | 26   | 56   | 70   |
| 9931 | 54   | 69   | 41   | 108  | 43    | 48   | 27   | 59.5 | 69.5 |
| 9932 | 36   | 19   | 16   | 74   | 29.5  | 24   | 17   | 35   | 26   |
| 9933 | 24   | 14   | 11   | 54.5 | 18    | 21   | 8    | 27.5 | 24   |
| 9934 | 45   | 63   | 43   | 108  | 34.5  | 37   | 29   | 60   | 63   |
| 9935 | 28   | 20   | 15.5 | 67   | 18    | 17   | 17.5 | 24   | 42   |
| 9936 | 37.5 | 34   | 23   | 74   | 25    | 29   | 17   | 48   | 44   |
| 9937 | 32   | 33   | 23   | 67   | 28.5  | 22   | 18   | 37   | 81   |
| 9938 | 25.5 | 6    | 10.5 | 49.5 | 18    | 11   | 7    | 17   | 13   |
| 9939 | 47   | 46   | 29   | 77   | 35    | 34   | 25   | 44   | 44   |
| 9940 | 43.5 | 42   | 21   | 77   | 26.5  | 41   | 19   | 42   | 46   |
| 9941 | 27.5 | 14   | 12   | 73   | 18    | 19   | 8    | 19.5 | 23   |
| 9942 | 44   | 26   | 17   | 64   | 20    | 19   | 13   | 31   | 42   |
| 9943 | 35   | 46   | 27   | 77.5 | 29    | 29   | 21   | 50   | 69   |
| 9944 | 24   | 10   | 10   | 52   | 20    | 16.5 | 8    | 17   | 35   |
| 9945 | 29   | 12   | 12   | 50   | 18    | 17   | 9    | 17   | 34   |
| 9946 | 15   | 10   | 6    | 28   | 7     | 13   | 4    | 9    | 17   |
| 9947 | 34   | 34   | 23   | 91.5 | 23    | 28   | 16   | 66   | 54   |
| 9948 | 41   | 53   | 30   | 80   | 29    | 40   | 24   | 51   | 56   |
| 9949 | 23   | 18   | 9    | 42   | 16    | 17   | 7    | 12   | 10   |
| 9950 | 23   | 11   | 8    | 27   | 16    | 13   | 8    | 10   | 9    |
| 9951 | 25   | 24   | 9    | 35   | 19    | 15   | 7    | 18   | 13   |
| 9952 | 41.5 | 19   | 14   | 39   | 19    | 23   | 31   | 76   | 17   |
| 9953 | 24   | 17.5 | 15   | 104  | 23    | 19   | 12   | 20   | 18   |
| 9954 | 40   | 15   | 12   | 41   | 24    | 19   | 19   | 20   | 14   |
| 9955 | 44   | 17   | 11   | 33   | 21    | 30   | 12   | 19   | 17   |
| 9956 | 27   | 12   | 10   | 34   | 18    | 18   | 7    | 12   | 8    |
| 9957 | 22   | 27   | 23   | 38   | 17    | 16   | 8    | 13   | 10   |
| 9958 | 33   | 26   | 19   | 88   | 27    | 22   | 16   | 28   | 32   |
| 9959 | 32.5 | 16   | 15.5 | 48   | 36    | 16   | 37   | 17   | 15   |
| 9960 | 23   | 14   | 13   | 24   | 22.5  | 19   | 8    | 14   | 12   |
| 9961 | 66   | 27   | 43   | 123  | 45    | 35   | 17   | 42   | 68.5 |
| 9962 | 44   | 28.5 | 30   | 109  | 351.5 | 34.5 | 16   | 37   | 36   |

|       |      |      |      |       |      |       |      |      |      |
|-------|------|------|------|-------|------|-------|------|------|------|
| 9963  | 143  | 26   | 24   | 62    | 36   | 40    | 18   | 45   | 29.5 |
| 9964  | 55.5 | 25   | 29   | 120   | 38   | 33    | 21   | 88   | 147  |
| 9965  | 52   | 30   | 37   | 119   | -1   | 34    | 18   | 81   | 156  |
| 9966  | 22   | 16   | 12   | 71.5  | 21   | 17.5  | 10   | 18   | 30   |
| 9967  | 28   | 16   | 15.5 | 64    | 23   | 23    | 9.5  | 17   | 44   |
| 9968  | 30   | 20   | 26   | 120   | 25   | 23    | 15   | 26   | 22   |
| 9969  | 55   | 20   | 15   | 57    | 28   | 24    | 35   | 28   | 24   |
| 9970  | 48   | 22   | 30   | 99    | 27   | 29.5  | 15   | 37   | 22   |
| 9971  | 27   | 20   | 19   | 63.5  | 22.5 | 18    | 7    | 22   | 33   |
| 9972  | 21   | 18   | 13   | 58.5  | 26.5 | 20    | 14   | 17   | 15   |
| 9973  | 27   | 16   | 10.5 | 43.5  | 24   | 20    | 8.5  | 18   | 23   |
| 9974  | 18   | 13   | 9    | 49    | 17   | 17.5  | 7    | 11   | 10   |
| 9975  | 20.5 | 15   | 12   | 62.5  | 18   | 20    | 9    | 18   | 13   |
| 9976  | 25   | 14   | 13   | 65    | 91   | 21    | 8    | 16.5 | 16   |
| 9977  | 20   | 16   | 13   | 75    | 29   | 20    | 9    | 20.5 | 22   |
| 9978  | 34   | 40   | 24   | 87    | 29   | 28    | 18   | 41   | 38   |
| 9979  | 43   | 73   | 35   | 112   | 37.5 | 46    | 32.5 | 69   | 122  |
| 9980  | 31   | 34   | 23.5 | 101   | 44.5 | 31    | 18   | 35   | 62   |
| 9981  | 54   | 38   | 22   | 87.5  | 29.5 | 36    | 39   | 77.5 | 33   |
| 9982  | 29   | 35   | 21   | 85    | 27   | 28    | 15   | 39   | 47   |
| 9983  | 58.5 | 79   | 42   | 112.5 | 41.5 | 52    | 35.5 | 87   | 100  |
| 9984  | 41   | 72   | 43   | 114.5 | 36   | 43    | 29   | 68   | 81   |
| 9985  | 48.5 | 43.5 | 31   | 92.5  | 32   | 37    | 23   | 54.5 | 51   |
| 9986  | 37   | 17   | 18   | 72.5  | 24   | 23    | 10   | 23   | 27   |
| 9987  | 40   | 18   | 17   | 137   | 15   | 23    | 17   | 78   | 35.5 |
| 9988  | 28.5 | 43   | 28   | 77    | 28   | 31    | 20   | 43   | 55.5 |
| 9989  | 44   | 81.5 | 41   | 90.5  | 37   | 42    | 29   | 69   | 89   |
| 9990  | 30   | 30   | 25   | 100   | 29.5 | 25    | 14   | 33.5 | 34   |
| 9991  | 39   | 43.5 | 26   | 133   | 30   | 36.5  | 23   | 48   | 77.5 |
| 9992  | 42   | 49   | 30   | 91    | 35   | 34    | 25   | 52.5 | 69   |
| 9993  | 36.5 | 49.5 | 34   | 100.5 | 29   | 34    | 22   | 65   | 53   |
| 9994  | 24   | 15   | 16   | 87.5  | 24   | 16.5  | 11   | 23   | 14   |
| 9995  | 41   | 67.5 | 33   | 120   | 38   | 42    | 30   | 67   | 58   |
| 9996  | 47   | 59   | 50.5 | 112   | 36   | 41    | 25   | 61   | 74   |
| 9997  | 37   | 46   | 30   | 90.5  | 40   | 35.5  | 19   | 45   | 48   |
| 9998  | 45   | 74.5 | 39.5 | 137   | 43.5 | 49    | 32   | 78.5 | 83   |
| 9999  | 38.5 | 57.5 | 29.5 | 101   | 32   | 41    | 23   | 51.5 | 80   |
| 10000 | 36   | 67   | 31   | 109   | 36.5 | 38    | 26   | 67   | 75   |
| 10001 | 27   | 23   | 19   | 119   | 23   | 22    | 11   | 32   | 27   |
| 10002 | 41.5 | 57   | 33   | 110   | 35.5 | 39    | 26   | 58   | 78   |
| 10003 | 48   | 20   | 19   | 70.5  | 22   | 32    | 15   | 23   | 43   |
| 10004 | 21.5 | 12   | 12   | 54    | 19   | 18    | 14   | 17   | 15   |
| 10005 | 49   | 28   | 19   | 77    | 23   | 34    | 13   | 28   | 32.5 |
| 10006 | 32   | 13   | 16   | 85.5  | 22   | 18    | 11   | 21.5 | 18   |
| 10007 | 37   | 18   | 14   | 85.5  | 19   | 31    | 9    | 19   | 38   |
| 10008 | 25   | 31   | 19   | 83    | 23   | 19    | 15   | 36   | 34   |
| 10009 | 164  | 84   | 24   | 139   | 30.5 | 219.5 | 18   | 45   | 69   |

|       |       |      |      |       |       |      |      |       |      |
|-------|-------|------|------|-------|-------|------|------|-------|------|
| 10010 | 31.5  | 28   | 17   | 73.5  | 22    | 25   | 12   | 31    | 25   |
| 10011 | 30    | 36   | 18   | 75.5  | 22    | 24   | 14   | 45    | 40   |
| 10012 | 25.5  | 14   | 13   | 67    | 18.5  | 17   | 10   | 21    | 17   |
| 10013 | 23    | 14   | 14.5 | 77    | 18    | 18   | 9.5  | 17.5  | 16   |
| 10014 | 17    | 11.5 | 11   | 53    | 19    | 15   | 7    | 14    | 21   |
| 10015 | 21    | 14   | 14   | 90    | 19    | 16   | 6    | 20    | 14   |
| 10016 | 128.5 | 18   | 16   | 43    | 25.5  | 23.5 | 11   | 46    | 14   |
| 10017 | 14    | 12   | 6    | 25    | 17    | 16   | 6    | 10    | 10   |
| 10018 | 18    | 12   | 9    | 69    | 19    | 17   | 6    | 17    | 12   |
| 10019 | 27    | 22   | 17.5 | 67.5  | 33    | 22   | 11   | 21    | 32.5 |
| 10020 | 54    | 46   | 28   | 83    | 26.5  | 31   | 20   | 61    | 70   |
| 10021 | 22    | 14   | 13   | 58.5  | 22    | 19   | 8    | 52.5  | 18.5 |
| 10022 | 34    | 14   | 39   | 33    | 25    | 17   | 14   | 103   | 14   |
| 10023 | 35    | 14   | 14   | 76.5  | 26.5  | 19   | 23   | 21    | 27   |
| 10024 | 21    | 14   | 13   | 96    | 21    | 18.5 | 15   | 18    | 18   |
| 10025 | 55    | 45   | 31   | 115   | 32    | 38.5 | 25   | 67    | 80   |
| 10026 | 224   | 24   | 28.5 | 135.5 | 31.5  | 91.5 | 16   | 45    | 54   |
| 10027 | 28.5  | 14   | 12   | 58    | 22    | 17.5 | 12   | 19    | 17   |
| 10028 | 16    | 11   | 11   | 44    | 33    | 14   | 25   | 70    | 14   |
| 10029 | 26    | 14.5 | 19   | 66    | 18    | 18   | 10.5 | 165   | 14   |
| 10030 | 24    | 12   | 23   | 63    | 28.5  | 14   | 9    | 17    | 13   |
| 10031 | 29    | 13   | 12   | 31    | 21    | 16   | 10   | 21    | 23   |
| 10032 | 25    | 15   | 17   | 87    | 21    | 22   | 9    | 38    | 49   |
| 10033 | 18    | 14   | 17   | 86    | 20.5  | 16   | 8    | 12    | 9    |
| 10034 | 21    | 13   | 12   | 55    | 20    | 19   | 8    | 17    | 9    |
| 10035 | 39    | 24   | 14   | 48    | 31    | 31   | 12   | 17    | 22   |
| 10036 | 59    | 37   | 32   | 139   | 35    | 37   | 24.5 | 57    | 58   |
| 10037 | 30.5  | 24   | 18.5 | 52    | 30    | 29.5 | 12   | 18    | 23   |
| 10038 | 63    | 38   | 42   | 286.5 | 49    | 43   | 53   | 174.5 | 31   |
| 10039 | 56    | 27   | 25   | 150   | 29    | 37.5 | 16   | 38    | 21   |
| 10040 | 23    | 19   | 12   | 85    | 24    | 27.5 | 9    | 15    | 15   |
| 10041 | 98.5  | 74   | 42   | 113.5 | 38    | 55   | 31   | 57    | 64   |
| 10042 | 34.5  | 22.5 | 20   | 66    | 29    | 27   | 10   | 24    | 53   |
| 10043 | 49    | 42   | 26   | 82    | 39.5  | 39   | 18   | 47    | 44   |
| 10044 | 161   | 52   | 23   | 102   | 32    | 95   | 17   | 40    | 62.5 |
| 10045 | 58    | 71   | 42   | 135   | 73    | 52   | 26.5 | 64    | 69   |
| 10046 | 52    | 49.5 | 33   | 96.5  | 26    | 42   | 20   | 48    | 46   |
| 10047 | 76    | 55   | 30   | 113   | 30    | 45.5 | 24   | 50    | 52   |
| 10048 | 50.5  | 34   | 24   | 69    | 27.5  | 34   | 15   | 30    | 51.5 |
| 10049 | 47    | 51   | 35   | 95    | 34    | 43.5 | 25   | 51    | 57.5 |
| 10050 | 44    | 37   | 23   | 72    | 24    | 37   | 18   | 37    | 44   |
| 10051 | 47    | 65.5 | 51   | 91    | 34    | 44   | 26   | 56    | 69.5 |
| 10052 | 55    | 44   | 24   | 102.5 | 23    | 35   | 15   | 34    | 36   |
| 10053 | 53.5  | 64   | 31   | 130.5 | 32    | 49   | 32   | 56    | 70   |
| 10054 | 47    | 26   | 18   | 63    | 129.5 | 26   | 15   | 28    | 41   |
| 10055 | 41.5  | 17   | 21   | 77    | 24    | 26   | 10   | 33    | 31   |
| 10056 | 46    | 42.5 | 32.5 | 88    | 26.5  | 39   | 21   | 51    | 54   |



|       |      |      |      |       |      |      |      |      |      |
|-------|------|------|------|-------|------|------|------|------|------|
| 10057 | 46   | 29.5 | 22   | 75    | 19   | 29   | 14   | 36   | 53   |
| 10058 | 64   | 65   | 36   | 126   | 40   | 43.5 | 32   | 67.5 | 69   |
| 10059 | 47.5 | 37.5 | 22   | 86    | 21.5 | 36   | 16   | 36   | 45   |
| 10060 | 46.5 | 52.5 | 32   | 102   | 25   | 35   | 21   | 58   | 53.5 |
| 10061 | 56   | 59   | 33.5 | 112   | 31   | 46   | 27   | 59.5 | 70.5 |
| 10062 | 35   | 19   | 17.5 | 84    | 16   | 20   | 9    | 25.5 | 41   |
| 10063 | 74.5 | 44   | 20   | 104   | 22   | 62.5 | 15   | 43   | 70   |
| 10064 | 97   | 61   | 37   | 132   | 37.5 | 42   | 28   | 69.5 | 89   |
| 10065 | 35   | 31.5 | 22   | 63    | 23   | 26   | 15   | 30   | 42   |
| 10066 | 42   | 38   | 27   | 70    | 24   | 34   | 17   | 48   | 61   |
| 10067 | 55   | 80   | 37   | 104   | 33   | 52   | 31   | 77   | 79   |
| 10068 | 99   | 30   | 24   | 80    | 22.5 | 31   | 15   | 46.5 | 41   |
| 10069 | 44.5 | 78   | 32   | 105   | 28.5 | 48   | 28   | 68   | 69   |
| 10070 | 39   | 23.5 | 40   | 88    | 18   | 30   | 12   | 33   | 27   |
| 10071 | 40   | 37   | 20.5 | 90    | 26   | 33   | 18   | 35   | 46   |
| 10072 | 46.5 | 55   | 28   | 93    | 29   | 49   | 24   | 49   | 65.5 |
| 10073 | 68   | 38   | 25   | 125   | 27   | 48   | 16   | 48   | 78   |
| 10074 | 57   | 55.5 | 31   | 113   | 28   | 41   | 24   | 61   | 65   |
| 10075 | 36.5 | 39.5 | 26   | 92    | 25   | 35   | 16   | 49   | 42   |
| 10076 | 47   | 36   | 21   | 83    | 21   | 32   | 16   | 34   | 47   |
| 10077 | 59   | 36   | 24   | 97    | 30   | 51   | 15   | 54.5 | 51   |
| 10078 | 58   | 50.5 | 29   | 123.5 | 34.5 | 42.5 | 28   | 81   | 79.5 |
| 10079 | 59   | 37   | 22   | 99    | 28   | 33.5 | 39   | 39   | 41.5 |
| 10080 | 50   | 65   | 36   | 114.5 | 27   | 46   | 36   | 67   | 100  |
| 10081 | 54   | 58   | 30.5 | 118   | 33   | 43   | 25   | 63   | 71   |
| 10082 | 56   | 49   | 26   | 87.5  | 29   | 40   | 25   | 44   | 47   |
| 10083 | 32   | 26   | 19   | 112   | 17   | 26   | 16   | 30   | 28   |
| 10084 | 40.5 | 43   | 27   | 108.5 | 21.5 | 32   | 17   | 49   | 55   |
| 10085 | 27   | 17.5 | 10   | 38    | 21   | 23   | 10   | 16   | 26   |
| 10086 | 22   | 14   | 11   | 37    | 14   | 19   | 8    | 11   | 10   |
| 10087 | 21   | 14   | 9    | 63    | 11.5 | 20   | 6    | 12   | 11   |
| 10088 | 47   | 16   | 11   | 25    | 18   | 20   | 8    | 15   | 13   |
| 10089 | 79   | 14   | 8    | 25    | 14   | 34   | 8    | 13   | 17   |
| 10090 | 36   | 16   | 14   | 25    | 20.5 | 22   | 10   | 40   | 18   |
| 10091 | 29   | 16   | 13   | 130   | 710  | 20   | 8    | 21   | 13.5 |
| 10092 | 33   | 13   | 8    | 90    | 14   | 19   | 7    | 17   | 10   |
| 10093 | 36   | 17   | 28   | 109   | 23   | 20   | 9    | 24   | 23   |
| 10094 | 23.5 | 13   | 8    | 41    | 12   | 17.5 | 11   | 11   | 9    |
| 10095 | 74.5 | 15   | 11   | 91.5  | 20   | 29   | 20   | 57   | 13   |
| 10096 | 57   | 12   | 9    | 43    | 16   | 18   | 7    | 18.5 | 26   |
| 10097 | 20   | 10   | 8    | 42    | 19   | 18   | 5    | 9    | 10   |
| 10098 | 27   | 10   | 8    | 30.5  | 25   | 13   | 10   | 96   | 10   |
| 10099 | 53.5 | 55   | 27.5 | 116   | 35   | 42   | 25   | 61.5 | 55.5 |
| 10100 | 42   | 46   | 24   | 107   | 31   | 33   | 18   | 47   | 55.5 |
| 10101 | 38   | 45   | 25   | 79.5  | 32   | 30.5 | 20.5 | 46   | 52   |
| 10102 | 38   | 48   | 22   | 101   | 22   | 42   | 18.5 | 45   | 50   |
| 10103 | 73   | 70.5 | 33   | 98    | 30   | 50   | 30   | 78.5 | 82   |

|       |        |      |      |       |       |       |      |      |      |
|-------|--------|------|------|-------|-------|-------|------|------|------|
| 10104 | 44     | 52   | 29.5 | 84    | 34.5  | 33    | 22   | 77   | 117  |
| 10105 | 43     | 60.5 | 26   | 76    | 25    | 34    | 25   | 57   | 55   |
| 10106 | 39     | 41   | 24   | 96    | 21    | 31    | 15   | 38   | 69   |
| 10107 | 31.5   | 23   | 16   | 70.5  | 16    | 21    | 11   | 27   | 63.5 |
| 10108 | 66     | 17   | 16   | 81    | 24    | 22    | 26   | 27   | 19   |
| 10109 | 112    | 44   | 26   | 92.5  | 22    | 35    | 18   | 48   | 58.5 |
| 10110 | 39.5   | 56   | 30.5 | 87    | 25    | 38    | 22   | 52.5 | 54   |
| 10111 | 26     | 18   | 12   | 62    | 24    | 22    | 9    | 23   | 31   |
| 10112 | 29     | 21   | 18   | 84    | 20.5  | 23    | 10   | 32   | 47   |
| 10113 | 40     | 34   | 28   | 92    | 20    | 29    | 16   | 44   | 59   |
| 10114 | 44.5   | 21   | 14   | 60    | 13.5  | 22    | 10   | 21   | 23   |
| 10115 | 48     | 27   | 22   | 71    | 36    | 29    | 20   | 45   | 32   |
| 10116 | 48     | 58   | 33   | 106   | 37    | 40.5  | 29   | 61   | 96   |
| 10117 | 28     | 24.5 | 18   | 87    | 21    | 22    | 11   | 55.5 | 36   |
| 10118 | 37.5   | 45   | 25   | 82    | 23    | 33    | 21   | 49   | 47   |
| 10119 | 33     | 45.5 | 26   | 74    | 23    | 32.5  | 20   | 53   | 80   |
| 10120 | 47     | 42   | 26   | 94    | 27    | 32.5  | 20   | 45   | 51   |
| 10121 | 35     | 49   | 22   | 78    | 24    | 30    | 17   | 43   | 40   |
| 10122 | 40     | 30   | 24   | 97    | 22    | 27    | 16   | 40   | 43   |
| 10123 | 35.5   | 32   | 20   | 75    | 15    | 23    | 15   | 41   | 44   |
| 10124 | 56     | 64   | 35   | 92    | 50    | 41    | 28   | 62   | 119  |
| 10125 | 41     | 61   | 30   | 122   | 28    | 36    | 44   | 60   | 66   |
| 10126 | 91     | 64   | 35   | 107   | 30    | 44    | 25   | 61.5 | 61   |
| 10127 | 119    | 50   | 32   | 79    | 24    | 43    | 19   | 44   | 51   |
| 10128 | 44     | 46   | 27   | 91    | 29    | 37.5  | 21   | 49   | 60.5 |
| 10129 | 44     | 44   | 26   | 78    | 26.5  | 31    | 17   | 44.5 | 44   |
| 10130 | 47     | 58   | 31.5 | 103.5 | 30.5  | 36    | 25   | 61   | 61   |
| 10131 | 66     | 46   | 26   | 96    | 32    | 45    | 20   | 46   | 67   |
| 10132 | 48     | 45   | 29   | 80    | 27    | 33    | 24   | 43   | 53   |
| 10133 | 64     | 43   | 28   | 86    | 27    | 48.5  | 21   | 53.5 | 52   |
| 10134 | 40     | 48   | 27   | 82    | 31    | 34.5  | 21   | 56   | 87.5 |
| 10135 | 73     | 72   | 38   | 123   | 34    | 46    | 34   | 74   | 82   |
| 10136 | 76     | 56   | 29   | 106   | 32    | 39    | 23   | 58   | 76.5 |
| 10137 | 61     | 73   | 39   | 118   | 65    | 48    | 30   | 77.5 | 117  |
| 10138 | 43     | 39   | 22   | 82    | 21.5  | 33    | 20   | 39   | 43   |
| 10139 | 35     | 34   | 20.5 | 90    | 35    | 31.5  | 16   | 40.5 | 38   |
| 10140 | 45     | 76   | 32   | 93    | 29.5  | 42    | 28   | 68   | 77   |
| 10141 | 57     | 71   | 35   | 109   | 42    | 44.5  | 25   | 73   | 79   |
| 10142 | 67     | 37   | 21   | 62    | 21    | 29    | 15.5 | 37   | 67.5 |
| 10143 | 72     | 45   | 27   | 93.5  | 29.5  | 32.5  | 17   | 45   | 38   |
| 10144 | 58     | 53   | 25   | 96    | 32    | 38    | 22   | 55   | 57   |
| 10145 | 45     | 42   | 24   | 79    | 22.5  | 30    | 22   | 46   | 49   |
| 10146 | 64     | 65   | 38   | 144   | 31    | 46    | 29   | 73   | 70   |
| 10147 | 40.5   | 53   | 30   | 83    | 35    | 37    | 23   | 55.5 | 61   |
| 10148 | 2910   | 102  | 97   | 112.5 | 277   | 742   | 22   | 45   | 117  |
| 10149 | 2079.5 | 102  | 111  | 153   | 331.5 | 468.5 | 25   | 60   | 102  |
| 10150 | 93     | 76.5 | 39   | 159.5 | 34    | 47    | 30   | 84   | 70   |

|       |      |      |      |       |       |      |      |      |      |
|-------|------|------|------|-------|-------|------|------|------|------|
| 10151 | 15.5 | 9    | 4    | 12    | 10    | 13   | 7    | 21   | 7    |
| 10152 | 36   | 16   | 17   | 83    | 178   | 19   | 13   | 65   | 43   |
| 10153 | 37   | 20   | 22.5 | 55    | 903   | 21.5 | 13   | 61   | 13   |
| 10154 | 29   | 14   | 14   | 39.5  | 22    | 25   | 10   | 22   | 16   |
| 10155 | 27   | 19.5 | 12   | 40    | 19.5  | 27   | 8    | 19   | 20   |
| 10156 | 26   | 17   | 15   | 82.5  | 16    | 17   | 8    | 29   | 21   |
| 10157 | 109  | 34.5 | 32   | 213   | 39    | 32.5 | 17   | 52   | 83   |
| 10158 | 58   | 23   | 17   | 85    | 23.5  | 28   | 28   | 70   | 14   |
| 10159 | 77.5 | 25   | 31   | 154.5 | 54    | 38   | 29   | 36   | 28   |
| 10160 | 33   | 25   | 26.5 | 309   | 41    | 34.5 | 15   | 39   | 28   |
| 10161 | 33   | 23   | 19   | 71    | 24    | 28   | 21   | 50   | 18   |
| 10162 | 42   | 21   | 12.5 | 85.5  | 136.5 | 24.5 | 8    | 22   | 18   |
| 10163 | 32.5 | 20   | 14   | 54    | 23    | 24   | 15   | 21   | 55   |
| 10164 | 30   | 21   | 8    | 55    | 13    | 27   | 8    | 19   | 15   |
| 10165 | 50   | 30   | 29   | 312   | 63    | 39   | 13   | 83   | 25   |
| 10166 | 28   | 20   | 15   | 100   | 17    | 28   | 9.5  | 24   | 18.5 |
| 10167 | 22   | 17   | 11   | 48    | 15    | 21   | 8    | 13   | 11   |
| 10168 | 32   | 20   | 10   | 46    | 23.5  | 32   | 10   | 16   | 18   |
| 10169 | 45   | 16   | 15   | 139.5 | 15    | 21   | 8    | 28   | 24   |
| 10170 | 51   | 20   | 23   | 134   | 24.5  | 29   | 10   | 36   | 17   |
| 10171 | 28   | 17   | 12   | 72    | 15    | 23.5 | 12   | 44.5 | 15   |
| 10172 | 32   | 16   | 8    | 62    | 15    | 24   | 6    | 22.5 | 12   |
| 10173 | 21   | 17   | 8    | 53.5  | 14    | 24   | 6    | 13   | 11   |
| 10174 | 19   | 13   | 9    | 53.5  | 16    | 22   | 7    | 12   | 9.5  |
| 10175 | 20   | 15   | 12   | 52    | 13    | 21   | 6    | 12   | 12   |
| 10176 | 1214 | 29   | 34   | 117.5 | 47.5  | 38   | 30   | 52   | 32   |
| 10177 | 65   | 20   | 15   | 91    | 27    | 27   | 11.5 | 90   | 21   |
| 10178 | 43   | 18   | 13   | 81    | 20    | 32   | 10   | 23   | 31   |
| 10179 | 32   | 19   | 13   | 55.5  | 21    | 25   | 11   | 46   | 237  |
| 10180 | 41   | 18   | 10   | 56.5  | 47.5  | 26   | 8    | 18   | 14   |
| 10181 | 67   | 24   | 23   | 121   | 27    | 34   | 23   | 80   | 37   |
| 10182 | 33.5 | 19.5 | 12   | 56    | 17.5  | 29   | 12   | 51   | 16   |
| 10183 | 161  | 32   | 45   | 283   | 50    | 53   | 46   | 117  | 61   |
| 10184 | 64   | 19   | 16   | 117   | 29    | 27   | 14   | 26   | 15   |
| 10185 | 29   | 30   | 16   | 87    | 16    | 26   | 13   | 26   | 28   |
| 10186 | 46.5 | 20.5 | 18   | 122   | 25    | 26   | 37.5 | 35.5 | 34   |
| 10187 | 20   | 14   | 11   | 65    | 10.5  | 20   | 14   | 18.5 | 11   |
| 10188 | 25   | 19   | 10   | 67    | 100   | 21   | 9    | 18   | 23   |
| 10189 | 28   | 22   | 12   | 88    | 16    | 25   | 10   | 21   | 82   |
| 10190 | 25   | 17   | 17   | 89    | 22    | 20   | 14   | 21   | 23   |
| 10191 | 39   | 22   | 17   | 54    | 15    | 24   | 10   | 17   | 54   |
| 10192 | 40.5 | 22   | 44   | 116.5 | 43.5  | 24   | 16   | 37   | 31   |
| 10193 | 38   | 19   | 16   | 118   | 22    | 24   | 11   | 31   | 21   |
| 10194 | 44.5 | 17   | 13   | 57.5  | 23    | 21   | 15   | 23   | 15.5 |
| 10195 | 52   | 14   | 9    | 45    | 15    | 21   | 8    | 14.5 | 33   |
| 10196 | 30   | 17   | 10   | 48    | 17    | 24   | 8    | 51.5 | 12   |
| 10197 | 19   | 14   | 8    | 45    | 21    | 20   | 6    | 12   | 15   |

|       |       |      |      |       |      |      |      |       |      |
|-------|-------|------|------|-------|------|------|------|-------|------|
| 10198 | 19    | 13   | 8    | 59    | 17   | 17   | 7    | 14    | 11   |
| 10199 | 22    | 14   | 11   | 70.5  | 13   | 20   | 9    | 16    | 12   |
| 10200 | 21    | 14   | 10   | 67    | 12.5 | 17   | 7.5  | 16    | 8    |
| 10201 | 20    | 13   | 7    | 28    | 10   | 20   | 6    | 13    | 9    |
| 10202 | 20    | 13   | 8    | 55    | 10.5 | 20   | 7    | 15    | 9    |
| 10203 | 23.5  | 17   | 11   | 101   | 12   | 19   | 9    | 18.5  | 40   |
| 10204 | 22    | 15   | 9    | 101   | 28   | 22   | 8    | 17.5  | 11   |
| 10205 | 66    | 23   | 17   | 97.5  | 21   | 28   | 16   | 33    | 21   |
| 10206 | 53    | 24.5 | 21   | 106   | 25   | 33   | 18   | 86    | 34   |
| 10207 | 62    | 57   | 34.5 | 122   | 48   | 51.5 | 27   | 45    | 68   |
| 10208 | 21    | 22   | 9    | 47    | 15   | 23   | 7    | 98.5  | 26   |
| 10209 | 221.5 | 18   | 12   | 54    | 32   | 25   | 31   | 36    | 28   |
| 10210 | 344   | 13.5 | 14   | 97    | 21   | 20   | 14   | 18    | 18   |
| 10211 | 47    | 25   | 17   | 63    | 20   | 45   | 11   | 24    | 26   |
| 10212 | 30    | 14   | 9    | 39    | 19   | 21   | 8    | 14    | 11   |
| 10213 | 21    | 15   | 8    | 74    | 12.5 | 20   | 7    | 15    | 10   |
| 10214 | 21.5  | 12   | 7    | 49    | 16   | 18   | 7    | 14    | 9    |
| 10215 | 54    | 15   | 12   | 63    | 22   | 19   | 10   | 78    | 17   |
| 10216 | 21    | 11   | 8    | 57    | 13   | 19.5 | 6    | 14    | 9    |
| 10217 | 19    | 13   | 7    | 63    | 12   | 18   | 8    | 16    | 8    |
| 10218 | 31    | 16   | 12   | 71.5  | 23   | 22   | 9    | 117   | 12   |
| 10219 | 32    | 12   | 9    | 74.5  | 12.5 | 17   | 7    | 13    | 10   |
| 10220 | 29    | 16   | 10   | 72.5  | 21   | 21   | 19   | 45    | 11   |
| 10221 | 19    | 14   | 7    | 67.5  | 13   | 18   | 6    | 15    | 18   |
| 10222 | 47    | 14   | 9    | 46    | 24   | 20   | 13   | 108   | 9    |
| 10223 | 17    | 11   | 7    | 49.5  | 13   | 16.5 | 6    | 22    | 8    |
| 10224 | 21    | 12   | 8    | 30    | 14   | 17   | 6    | 13    | 8    |
| 10225 | 22    | 12   | 7    | 54    | 14   | 17   | 8    | 46    | 13   |
| 10226 | 126   | 46   | 26.5 | 114.5 | 21   | 37   | 29   | 114.5 | 39   |
| 10227 | 20    | 13   | 6    | 43    | 13   | 18   | 6    | 17    | 8    |
| 10228 | 26    | 16   | 16   | 117.5 | 15   | 20   | 9    | 39    | 11   |
| 10229 | 43    | 86   | 42   | 119   | 46   | 55   | 34   | 75    | 79   |
| 10230 | 58    | 63   | 35   | 95.5  | 39   | 60.5 | 26   | 53    | 60   |
| 10231 | 52.5  | 75.5 | 40   | 114   | 45.5 | 51   | 31   | 60    | 70   |
| 10232 | 59    | 43   | 29   | 95    | 33   | 44   | 20   | 44    | 62   |
| 10233 | 35    | 43   | 25   | 80    | 33   | 36   | 20.5 | 40    | 46.5 |
| 10234 | 41    | 53.5 | 27   | 75.5  | 35   | 39   | 20.5 | 50    | 59   |
| 10235 | 57    | 78   | 44   | 110   | 158  | 52   | 30   | 67    | 93   |
| 10236 | 55    | 38   | 23   | 73    | 32   | 53.5 | 17   | 32    | 52   |
| 10237 | 28    | 33   | 22   | 81    | 33.5 | 33.5 | 16   | 30    | 40   |
| 10238 | 41    | 33   | 26   | 85    | 42   | 35   | 17   | 40    | 37   |
| 10239 | 48    | 47   | 32   | 102   | 44   | 40   | 20   | 97    | 55   |
| 10240 | 39    | 49   | 31   | 99    | 39.5 | 34   | 20.5 | 47    | 60.5 |
| 10241 | 41    | 51   | 31   | 98    | 50.5 | 43.5 | 29   | 48    | 56   |
| 10242 | 46    | 55   | 30   | 119   | 35   | 42.5 | 22   | 50    | 57   |
| 10243 | 46    | 73   | 39   | 113.5 | 45   | 49   | 30   | 64    | 82   |
| 10244 | 48    | 57.5 | 39   | 108   | 42   | 49   | 33   | 59    | 74   |

|       |      |      |      |       |      |      |      |      |      |
|-------|------|------|------|-------|------|------|------|------|------|
| 10245 | 64.5 | 57   | 36   | 128   | 41   | 66   | 28   | 72   | 69.5 |
| 10246 | 36   | 57.5 | 32   | 86    | 44   | 39   | 22   | 51   | 85   |
| 10247 | 39   | 50   | 27   | 89    | 32.5 | 36   | 22   | 47   | 78   |
| 10248 | 39   | 38   | 24   | 106   | 30   | 33.5 | 16   | 41   | 76   |
| 10249 | 39   | 50   | 27.5 | 97    | 43.5 | 38   | 19.5 | 45   | 53   |
| 10250 | 45   | 41   | 30   | 67    | 33   | 44   | 18   | 33   | 54   |
| 10251 | 33.5 | 41   | 26   | 83    | 43.5 | 33   | 20   | 37   | 53   |
| 10252 | 50   | 64   | 63   | 246   | 47   | 51   | 25   | 67   | 72   |
| 10253 | 30   | 38   | 23   | 77    | 38   | 28   | 18   | 35   | 50   |
| 10254 | 33   | 46   | 34   | 90    | 34   | 36   | 21   | 44   | 51   |
| 10255 | 38.5 | 81   | 44   | 120.5 | 38.5 | 44   | 32.5 | 71   | 73   |
| 10256 | 60   | 54   | 38   | 112   | 42   | 55   | 22   | 61   | 62   |
| 10257 | 32   | 31   | 23   | 103   | 38.5 | 27.5 | 17   | 36   | 36   |
| 10258 | 35.5 | 37   | 27   | 125.5 | 37.5 | 32   | 21   | 43   | 50   |
| 10259 | 41   | 52.5 | 35   | 111.5 | 40   | 41   | 23   | 50   | 52   |
| 10260 | 45   | 43   | 38   | 112   | 47   | 37   | 21   | 53   | 61   |
| 10261 | 53   | 59.5 | 34   | 131   | 39   | 48   | 28   | 54   | 59.5 |
| 10262 | 45   | 70   | 37   | 97    | 44   | 45   | 29.5 | 72.5 | 70   |
| 10263 | 34.5 | 37   | 29   | 78    | 32   | 25   | 19   | 44   | 51   |
| 10264 | 39   | 53.5 | 31   | 138.5 | 37.5 | 39   | 22   | 50   | 51   |
| 10265 | 39   | 38   | 31   | 97.5  | 41   | 34.5 | 21   | 41   | 52.5 |
| 10266 | 38   | 48   | 32   | 97    | 37   | 37   | 22   | 48   | 58   |
| 10267 | 33   | 36   | 23   | 78    | 30   | 31   | 18   | 34   | 41   |
| 10268 | 52   | 59   | 31   | 72    | 35   | 49   | 26   | 51   | 69   |
| 10269 | 30   | 38   | 27   | 93.5  | 38   | 27   | 38   | 42   | 61.5 |
| 10270 | 48.5 | 65   | 37   | 110   | 36.5 | 44   | 31   | 53   | 62   |
| 10271 | 26   | 34.5 | 24   | 99    | 30   | 26   | 17   | 38.5 | 55   |
| 10272 | 30   | 44   | 27   | 117   | 32   | 30   | 21   | 40   | 46   |
| 10273 | 60.5 | 56.5 | 36   | 109.5 | 43.5 | 44   | 28   | 55   | 67.5 |
| 10274 | 21   | 14   | 12   | 67.5  | 23   | 19   | 7    | 15   | 26   |
| 10275 | 21   | 14   | 15   | 77    | 32   | 18   | 46   | 20   | 14   |
| 10276 | 16   | 14   | 10   | 40    | 20   | 16   | 8    | 12   | 21   |
| 10277 | 22   | 11   | 9    | 52    | 21   | 17   | 8    | 11   | 8    |
| 10278 | 17   | 13   | 12   | 46    | 32.5 | 19   | 8    | 12   | 61   |
| 10279 | 23.5 | 20   | 16   | 48.5  | 24   | 22   | 10   | 15.5 | 34   |
| 10280 | 35.5 | 18.5 | 19   | 61    | 108  | 24   | 12   | 29   | 74   |
| 10281 | 31   | 18   | 14   | 40    | 37   | 20   | 11   | 16   | 30   |
| 10282 | 22   | 17   | 14   | 57.5  | 35   | 20   | 15   | 20   | 23   |
| 10283 | 63.5 | 31   | 19   | 101   | 37   | 63   | 19   | 59   | 128  |
| 10284 | 18   | 11   | 9    | 33    | 33   | 15   | 12   | 15   | 11   |
| 10285 | 17   | 14   | 12   | 75    | 44   | 17   | 10   | 15   | 29   |
| 10286 | 54   | 21   | 32   | 120   | 36   | 21   | 22   | 53   | 163  |
| 10287 | 62.5 | 15   | 18   | 93    | 41   | 17   | 13   | 29.5 | 94.5 |
| 10288 | 25.5 | 14   | 21   | 234   | 28   | 21   | 24.5 | 54.5 | 16   |
| 10289 | 58   | 24   | 32   | 158   | 95.5 | 30.5 | 20   | 87.5 | 36   |
| 10290 | 26   | 13   | 23   | 99    | 28   | 18   | 10   | 23.5 | 16   |
| 10291 | 30   | 16   | 42   | 165   | 30.5 | 22   | 16   | 50   | 17   |

|       |      |      |      |       |       |      |      |      |     |
|-------|------|------|------|-------|-------|------|------|------|-----|
| 10292 | 30   | 17   | 45.5 | 107   | 29    | 19   | 15   | 28   | 23  |
| 10293 | 23   | 15   | 13   | 45    | 30.5  | 17.5 | 17   | 17   | 19  |
| 10294 | 39   | 23   | 23   | 126.5 | 48.5  | 26   | 18   | 56   | 40  |
| 10295 | 51.5 | 21   | 29   | 109   | 51    | 27   | 15   | 46.5 | 102 |
| 10296 | 35   | 17.5 | 25   | 92    | 187   | 23.5 | 48   | 36   | 48  |
| 10297 | 68   | 33   | 33   | 78    | 46    | 34   | 34   | 52   | 45  |
| 10298 | 26   | 12   | 8    | 49    | 48.5  | 16   | 7    | 12   | 9   |
| 10299 | 19   | 12   | 7.5  | 24    | 27    | 17   | 8    | 11   | 12  |
| 10300 | 16   | 12   | 7    | 58    | 22    | 16   | 6    | 11   | 9   |
| 10301 | 13   | 12   | 7    | 21    | 20    | 16   | 8    | 8.5  | 8   |
| 10302 | 73   | 11   | 9    | 35    | 27    | 19   | 24   | 9.5  | 7   |
| 10303 | 16   | 11   | 7    | 35    | 25    | 19   | 7    | 11   | 13  |
| 10304 | 15   | 8    | 10   | 71    | 60    | 11   | 11   | 18   | 25  |
| 10305 | 41   | 11   | 12   | 52.5  | 29    | 17   | 13   | 17   | 12  |
| 10306 | 49   | 20   | 18   | 71    | 36    | 33.5 | 13   | 27.5 | 31  |
| 10307 | 45   | 17   | 17   | 74    | 143   | 23   | 14   | 27   | 34  |
| 10308 | 27   | 16   | 36   | 92    | 167   | 21   | 30.5 | 18   | 28  |
| 10309 | 18   | 12   | 10   | 15    | 29.5  | 15   | 8    | 13   | 8   |
| 10310 | 16   | 11.5 | 10   | 29    | 28    | 15   | 8    | 10   | 10  |
| 10311 | 38   | 12   | 11   | 55    | 29    | 15   | 15   | 20   | 16  |
| 10312 | 34   | 18.5 | 14   | 49    | 36    | 20   | 26   | 43   | 13  |
| 10313 | 32   | 15   | 16   | 51    | 47    | 21   | 58   | 79.5 | 47  |
| 10314 | 39.5 | 19   | 17   | 52    | 38.5  | 23   | 14   | 22   | 30  |
| 10315 | 22   | 14   | 11   | 37    | 32    | 18   | 9    | 72   | 14  |
| 10316 | 50.5 | 14   | 10   | 32    | 43    | 19   | 45   | 21   | 12  |
| 10317 | 17   | 11.5 | 10   | 38    | 27    | 15   | 19   | 12   | 21  |
| 10318 | 92   | 20   | 16   | 45    | 111.5 | 37   | 11   | 23   | 24  |
| 10319 | 52   | 14   | 10   | 32    | 30.5  | 27   | 10   | 31   | 13  |
| 10320 | 52   | 19   | 27   | 93    | 246.5 | 24   | 16   | 80   | 143 |
| 10321 | 41   | 14   | 20   | 92    | 33    | 15   | 13   | 28   | 58  |
| 10322 | 66   | 18   | 20.5 | 68    | 36    | 22   | 17   | 29   | 20  |
| 10323 | 87   | 17   | 15   | 45    | 109.5 | 34   | 11.5 | 27   | 26  |
| 10324 | 55.5 | 15   | 12   | 35    | 33    | 25   | 10   | 35   | 12  |
| 10325 | 42   | 15   | 22   | 82.5  | 220   | 19   | 15   | 70.5 | 122 |
| 10326 | 35.5 | 14   | 22   | 87    | 31.5  | 18   | 12   | 27   | 53  |
| 10327 | 29   | 22   | 17   | 49    | 30    | 30   | 16   | 24   | 16  |
| 10328 | 39   | 15   | 13   | 43.5  | 41.5  | 31   | 13   | 24   | 85  |
| 10329 | 32   | 30   | 18   | 72    | 27    | 22.5 | 15   | 35   | 39  |
| 10330 | 55.5 | 26   | 18   | 80    | 25    | 36   | 13   | 30.5 | 51  |
| 10331 | 49   | 38   | 25   | 89    | 47.5  | 28   | 21   | 43   | 66  |
| 10332 | 26.5 | 28   | 20   | 71    | 29    | 24.5 | 14   | 32   | 34  |
| 10333 | 37   | 41.5 | 29   | 87    | 34    | 29   | 19   | 42.5 | 43  |
| 10334 | 33   | 43   | 24.5 | 89    | 32    | 27   | 22   | 45   | 44  |
| 10335 | 36   | 42.5 | 38   | 87    | 33    | 32   | 20   | 50   | 55  |
| 10336 | 39   | 38   | 24   | 77.5  | 30    | 37   | 18   | 37   | 63  |
| 10337 | 26   | 30   | 19   | 92    | 26.5  | 23   | 14   | 35   | 50  |
| 10338 | 41   | 51   | 26   | 82.5  | 29.5  | 28   | 18   | 39   | 35  |

|       |      |      |      |       |      |      |      |      |      |
|-------|------|------|------|-------|------|------|------|------|------|
| 10339 | 37   | 52   | 33   | 113.5 | 41   | 34   | 29   | 54   | 66   |
| 10340 | 29.5 | 41   | 20   | 79    | 29.5 | 27   | 16   | 40   | 66   |
| 10341 | 21   | 24   | 15.5 | 58    | 23.5 | 23   | 12   | 25   | 24   |
| 10342 | 39.5 | 33   | 21   | 80.5  | 27   | 33   | 17   | 38.5 | 42   |
| 10343 | 37.5 | 33   | 19   | 87    | 28   | 26   | 15   | 41   | 35   |
| 10344 | 29   | 26   | 17   | 59    | 26   | 26.5 | 15   | 29   | 27   |
| 10345 | 25   | 29   | 17   | 54.5  | 26   | 24   | 13   | 29   | 43   |
| 10346 | 37.5 | 34   | 22   | 73    | 28   | 32   | 16   | 34.5 | 36   |
| 10347 | 43   | 44   | 37   | 92    | 34   | 32   | 22   | 47   | 67   |
| 10348 | 45   | 28.5 | 19   | 85    | 23   | 38   | 13   | 29   | 29   |
| 10349 | 34   | 39   | 28   | 139   | 36   | 26   | 22   | 52   | 42   |
| 10350 | 27   | 29   | 21   | 74    | 37   | 24   | 18   | 34   | 43   |
| 10351 | 30   | 40   | 22.5 | 88    | 33   | 26   | 18   | 40   | 37   |
| 10352 | 46   | 33   | 24   | 74    | 41.5 | 44.5 | 15   | 42   | 34   |
| 10353 | 32   | 30   | 31.5 | 53    | 22.5 | 28   | 14   | 28   | 47   |
| 10354 | 79   | 41   | 19   | 65    | 27   | 69   | 16   | 31.5 | 46   |
| 10355 | 33   | 34   | 20   | 77    | 25.5 | 29   | 15   | 32   | 54   |
| 10356 | 40   | 37   | 26   | 89    | 33   | 30   | 18.5 | 44   | 55   |
| 10357 | 27   | 30   | 18   | 65    | 26.5 | 27   | 16   | 37   | 48.5 |
| 10358 | 36   | 51   | 34   | 97    | 35.5 | 33   | 25   | 54   | 86   |
| 10359 | 32   | 43   | 24   | 72    | 30   | 28   | 22   | 41.5 | 56   |
| 10360 | 25   | 29   | 20   | 61.5  | 30   | 19   | 15   | 30.5 | 31.5 |
| 10361 | 28   | 27   | 17   | 67    | 24   | 24   | 13   | 38   | 31   |
| 10362 | 55   | 72   | 35   | 106   | 40   | 40.5 | 27   | 71.5 | 75   |
| 10363 | 23   | 12   | 11   | 76    | 19   | 19   | 7    | 21   | 16   |
| 10364 | 32   | 40   | 25   | 76    | 29   | 30   | 19   | 44   | 51   |
| 10365 | 27   | 27   | 19   | 71.5  | 25   | 21   | 15.5 | 31.5 | 49.5 |
| 10366 | 32   | 36   | 24   | 90    | 35   | 24   | 20   | 47   | 61   |
| 10367 | 49   | 30   | 18.5 | 93    | 22   | 39   | 12   | 32   | 29.5 |
| 10368 | 32   | 42   | 25   | 99    | 33.5 | 27   | 20   | 43   | 55   |
| 10369 | 29.5 | 45   | 21   | 79    | 26   | 29.5 | 19   | 41   | 43   |
| 10370 | 61.5 | 22   | 21   | 70    | 23   | 33   | 12   | 30   | 28   |
| 10371 | 44   | 41.5 | 23   | 85    | 30   | 39   | 18   | 48   | 50   |
| 10372 | 30   | 36   | 23   | 70    | 36   | 25.5 | 17   | 38   | 49   |
| 10373 | 32   | 35   | 20   | 71.5  | 28.5 | 25   | 18   | 40   | 45   |
| 10374 | 35.5 | 57   | 32   | 80.5  | 34   | 38.5 | 26   | 54   | 75   |
| 10375 | 29   | 35   | 21   | 80    | 31   | 26   | 17   | 37   | 55   |
| 10376 | 37   | 51.5 | 29   | 98    | 33   | 38   | 23   | 48.5 | 53.5 |
| 10377 | 59   | 52   | 30.5 | 96    | 43   | 34   | 34   | 65   | 59   |
| 10378 | 27.5 | 30.5 | 18   | 68    | 24   | 24.5 | 14   | 31   | 35   |
| 10379 | 44   | 47.5 | 30   | 100   | 36   | 35   | 24   | 55   | 60   |
| 10380 | 39   | 40   | 21   | 75    | 27   | 29   | 17   | 39   | 44.5 |
| 10381 | 32   | 23   | 16   | 73    | 31   | 18   | 13   | 26   | 27   |
| 10382 | 33   | 34.5 | 18   | 76.5  | 25   | 28   | 15   | 31   | 42   |
| 10383 | 20.5 | 13   | 12   | 45    | 19.5 | 14   | 9.5  | 21   | 19   |
| 10384 | 76   | 52   | 27   | 73.5  | 34   | 42.5 | 23   | 56   | 60   |
| 10385 | 31   | 33.5 | 19   | 140   | 27   | 26   | 17.5 | 39   | 41   |

|       |      |      |      |       |       |      |      |      |      |
|-------|------|------|------|-------|-------|------|------|------|------|
| 10386 | 40   | 37   | 21   | 79    | 31    | 28.5 | 16   | 42   | 41.5 |
| 10387 | 34   | 53.5 | 31   | 89    | 80.5  | 37   | 22   | 47   | 55   |
| 10388 | 17.5 | 9    | 7    | 20    | 25    | 11   | 7    | 11.5 | 11   |
| 10389 | 14   | 10   | 7    | 25    | 16    | 11   | 7    | 34   | 5    |
| 10390 | 17   | 11   | 12   | 54    | 29    | 16   | 11.5 | 19.5 | 10   |
| 10391 | 16.5 | 12   | 9    | 52    | 28    | 17   | 8    | 16   | 12   |
| 10392 | 17   | 8    | 7    | 35    | 22    | 11   | 6    | 10   | 5    |
| 10393 | 18   | 12   | 8    | 41.5  | 19    | 15   | 10   | 15   | 6    |
| 10394 | 26   | 18.5 | 11   | 51    | 17.5  | 20   | 11   | 75   | 13   |
| 10395 | 75   | 25   | 14   | 45.5  | 16    | 61   | 12   | 17   | 16   |
| 10396 | 18   | 19   | 12   | 34.5  | 24    | 24   | 9    | 14   | 14   |
| 10397 | 30   | 19   | 18   | 90    | 22    | 29   | 11   | 32   | 15   |
| 10398 | 30   | 20   | 16   | 114   | 19    | 25.5 | 10   | 22   | 22   |
| 10399 | 19   | 14.5 | 10   | 51    | 14    | 20   | 8    | 13   | 11   |
| 10400 | 28.5 | 17   | 13   | 71.5  | 14    | 23   | 7    | 12   | 14   |
| 10401 | 19   | 16   | 8    | 28    | 17    | 19   | 6    | 16   | 10   |
| 10402 | 40   | 22   | 18.5 | 35    | 21    | 32   | 11   | 22   | 23   |
| 10403 | 68.5 | 23.5 | 14   | 39    | 21    | 58   | 99   | 19   | 36   |
| 10404 | 30   | 14   | 17   | 65    | 34.5  | 21   | 12   | 22   | 23   |
| 10405 | 72   | 64   | 39.5 | 111   | 61.5  | 68   | 25   | 62   | 58   |
| 10406 | 36   | 49   | 28   | 95.5  | 31.5  | 36   | 23   | 49   | 70.5 |
| 10407 | 35   | 40   | 24   | 139.5 | 27    | 32   | 17   | 38   | 41   |
| 10408 | 36   | 40   | 35   | 110.5 | 34.5  | 29   | 18   | 43   | 43   |
| 10409 | 218  | 47   | 28.5 | 103   | 26    | 63   | 20   | 43   | 55   |
| 10410 | 44.5 | 41   | 25   | 105   | 26    | 38   | 18   | 37   | 89   |
| 10411 | 69   | 37   | 27   | 144   | 30    | 34   | 17   | 42   | 40   |
| 10412 | 50   | 39   | 23   | 98.5  | 24    | 28   | 20   | 37   | 46   |
| 10413 | 78.5 | 54   | 33.5 | 95    | 29    | 64   | 22   | 48   | 46   |
| 10414 | 54   | 61   | 40   | 98    | 44.5  | 42   | 31.5 | 62   | 62   |
| 10415 | 44   | 42   | 34   | 101   | 39    | 36.5 | 21   | 51   | 46   |
| 10416 | 36   | 30   | 20   | 98    | 220   | 30   | 17   | 31   | 36   |
| 10417 | 36   | 39   | 27   | 81    | 30    | 31   | 21   | 42   | 49   |
| 10418 | 50   | 41   | 42   | 83    | 38    | 34   | 23   | 42   | 44   |
| 10419 | 481  | 52   | 29   | 102   | 143.5 | 36   | 23   | 51   | 62   |
| 10420 | 48   | 61   | 31   | 122.5 | 27.5  | 37   | 26   | 61   | 57   |
| 10421 | 52.5 | 30   | 21   | 90    | 22    | 27   | 17   | 34   | 36   |
| 10422 | 39.5 | 32   | 22   | 94    | 20    | 31   | 17   | 36   | 39   |
| 10423 | 52   | 35   | 23   | 101.5 | 24.5  | 34   | 43   | 39.5 | 61   |
| 10424 | 31   | 27   | 63   | 73    | 32.5  | 25.5 | 16   | 29   | 59   |
| 10425 | 75.5 | 16   | 19   | 54    | 34.5  | 21   | 16   | 26   | 12   |
| 10426 | 9    | 12   | 6    | 11    | 6.5   | 13   | 7    | 8    | 7    |
| 10427 | 17   | 14.5 | 9    | 41    | 14    | 16   | 7    | 19   | 10   |
| 10428 | 68   | 18   | 17   | 116   | 52.5  | 26   | 13   | 21   | 26.5 |
| 10429 | 32   | 36   | 18   | 88    | 32    | 20   | 10   | 23   | 54   |
| 10430 | 30   | 16   | 18   | 85    | 19    | 21   | 11   | 21   | 25   |
| 10431 | 34.5 | 16   | 17   | 81.5  | 18    | 19   | 11   | 22   | 21   |
| 10432 | 24   | 14   | 16   | 97    | 17    | 19   | 9    | 21   | 34   |



|       |       |      |      |       |       |      |      |      |      |
|-------|-------|------|------|-------|-------|------|------|------|------|
| 10433 | 30    | 14   | 15   | 83    | 14    | 17   | 11   | 19   | 21   |
| 10434 | 41    | 13   | 23   | 128   | 18    | 22   | 11   | 29.5 | 19   |
| 10435 | 30    | 16   | 20.5 | 91.5  | 35.5  | 18   | 9    | 30   | 17   |
| 10436 | 26    | 11   | 16   | 121   | 196.5 | 13   | 8    | 31   | 15   |
| 10437 | 50    | 17   | 17   | 95.5  | 22    | 24.5 | 10   | 27   | 18.5 |
| 10438 | 47.5  | 61   | 40   | 126.5 | 29    | 42   | 31   | 72   | 70   |
| 10439 | 33    | 20   | 22   | 85    | 27.5  | 19   | 11   | 32   | 26   |
| 10440 | 37    | 14.5 | 19   | 97.5  | 22    | 23.5 | 11   | 29   | 33   |
| 10441 | 30    | 15.5 | 17   | 107   | 18.5  | 21   | 10.5 | 22   | 13   |
| 10442 | 33    | 12   | 20   | 79    | 17    | 20   | 8    | 23   | 24   |
| 10443 | 18    | 12   | 14   | 68    | 15    | 14   | 7    | 15   | 17   |
| 10444 | 30    | 13   | 17   | 98    | 20    | 18   | 7    | 24   | 23.5 |
| 10445 | 36    | 41   | 23   | 108   | 167   | 17   | 9    | 26   | 26   |
| 10446 | 32.5  | 17   | 19   | 89.5  | 24.5  | 24   | 11.5 | 33   | 35   |
| 10447 | 32    | 18   | 13   | 60    | 140   | 28   | 12   | 17   | 22   |
| 10448 | 37    | 16   | 20.5 | 123   | 30    | 18   | 13   | 53   | 39   |
| 10449 | 23    | 14   | 9    | 29    | 188   | 19   | 8    | 15   | 13   |
| 10450 | 36.5  | 23   | 12   | 56.5  | 32.5  | 39   | 10   | 34   | 24   |
| 10451 | 539   | 14   | 11   | 44    | 23    | 21   | 11   | 45   | 14   |
| 10452 | 12.5  | 9    | 7    | 27.5  | 23    | 11   | 6    | 8    | 7    |
| 10453 | 20    | 14   | 26   | 102   | 29    | 18   | 8    | 21.5 | 18   |
| 10454 | 30.5  | 25   | 24.5 | 69    | 32.5  | 26   | 15   | 23   | 37   |
| 10455 | 39    | 45   | 40.5 | 115.5 | 38.5  | 41   | 21   | 55   | 51   |
| 10456 | 37    | 51   | 32   | 87    | 38    | 39.5 | 25   | 48   | 90   |
| 10457 | 35.5  | 35   | 32   | 145   | 29.5  | 37   | 20   | 47   | 47   |
| 10458 | 57    | 49   | 33   | 147   | 33    | 46   | 23   | 44   | 77   |
| 10459 | 144   | 44   | 30   | 79    | 29.5  | 37   | 20.5 | 63   | 56   |
| 10460 | 60.5  | 53   | 35   | 119   | 38    | 45   | 25   | 59.5 | 107  |
| 10461 | 33.5  | 40   | 26   | 83    | 27    | 42   | 19   | 40   | 43   |
| 10462 | 35.5  | 55   | 33   | 94    | 33    | 37   | 24   | 47   | 70   |
| 10463 | 30    | 21   | 20   | 98    | 31    | 32   | 10   | 21   | 32   |
| 10464 | 47    | 50   | 34   | 136   | 37    | 40   | 25   | 51   | 58.5 |
| 10465 | 38    | 31   | 23   | 94    | 26    | 28   | 14   | 33   | 39   |
| 10466 | 46    | 45   | 26   | 131   | 33    | 44   | 20   | 42   | 112  |
| 10467 | 28    | 28   | 18   | 86.5  | 25    | 29.5 | 13   | 24   | 37   |
| 10468 | 45    | 61   | 34   | 113.5 | 48    | 52.5 | 26   | 54   | 63.5 |
| 10469 | 62    | 43   | 34   | 135   | 55    | 34   | 26   | 57   | 143  |
| 10470 | 39    | 43   | 31   | 104   | 33    | 43   | 20   | 35   | 43   |
| 10471 | 33    | 42.5 | 26.5 | 98.5  | 30    | 31   | 19   | 41.5 | 39   |
| 10472 | 83    | 53   | 31   | 106   | 34    | 84   | 21   | 42   | 56   |
| 10473 | 45    | 51.5 | 32   | 104.5 | 31    | 35.5 | 24   | 52   | 69   |
| 10474 | 46.5  | 47   | 33   | 104   | 34    | 35   | 23   | 46   | 61   |
| 10475 | 67    | 55   | 34   | 99    | 41    | 67.5 | 25   | 56   | 60   |
| 10476 | 127.5 | 45   | 26   | 101   | 30    | 63   | 19   | 43   | 47   |
| 10477 | 58    | 46   | 32   | 98.5  | 25    | 38.5 | 23   | 44   | 56   |
| 10478 | 43    | 45   | 34   | 110   | 33    | 38   | 25   | 46   | 74   |
| 10479 | 42    | 53   | 31   | 99    | 37.5  | 41   | 26   | 49   | 54   |

|       |       |      |      |       |      |      |      |      |      |
|-------|-------|------|------|-------|------|------|------|------|------|
| 10480 | 34    | 39   | 28   | 98    | 33   | 32   | 27   | 41   | 49   |
| 10481 | 278.5 | 54   | 35.5 | 119   | 36   | 53   | 27   | 54   | 76   |
| 10482 | 76    | 66   | 48   | 136   | 42   | 55   | 31   | 67   | 71   |
| 10483 | 43.5  | 78   | 43   | 110   | 42   | 50   | 32   | 75.5 | 93   |
| 10484 | 45.5  | 35   | 30   | 85.5  | 31   | 51   | 17   | 41   | 57   |
| 10485 | 35    | 42.5 | 31   | 90    | 30   | 36   | 23.5 | 43.5 | 52   |
| 10486 | 33.5  | 42   | 28   | 77    | 31.5 | 33.5 | 21   | 38   | 74   |
| 10487 | 58.5  | 50.5 | 32   | 118   | 32   | 36   | 26   | 53   | 59   |
| 10488 | 36    | 55.5 | 30   | 133   | 32   | 36   | 23   | 49   | 62   |
| 10489 | 32    | 48   | 30   | 87    | 32   | 33.5 | 22   | 45   | 54   |
| 10490 | 44    | 42   | 29   | 85    | 31   | 38   | 16   | 41   | 40   |
| 10491 | 35    | 45   | 33   | 103   | 33   | 37   | 21   | 44   | 48   |
| 10492 | 56    | 50   | 30   | 123.5 | 42   | 40   | 23   | 49   | 57   |
| 10493 | 106   | 47   | 37   | 110   | 36   | 42.5 | 28   | 48   | 47   |
| 10494 | 36.5  | 47   | 29   | 90    | 32.5 | 36   | 22   | 44   | 52   |
| 10495 | 47    | 50   | 29   | 128   | 72   | 36   | 64   | 47   | 57   |
| 10496 | 46    | 64   | 32.5 | 116   | 33   | 46   | 30   | 64   | 69   |
| 10497 | 16    | 13   | 14   | 68.5  | 19   | 18   | 9    | 13   | 12   |
| 10498 | 49    | 27   | 28   | 206.5 | 42   | 32   | 74   | 55   | 30   |
| 10499 | 28    | 17   | 11   | 53    | 19   | 19   | 7    | 17.5 | 13   |
| 10500 | 53    | 23   | 40   | 134   | 31   | 29   | 19   | 49.5 | 24   |
| 10501 | 29    | 17   | 15.5 | 94    | 24   | 21.5 | 9    | 39.5 | 12   |
| 10502 | 28    | 23   | 22   | 108   | 24   | 20   | 11   | 25   | 25.5 |
| 10503 | 38    | 23   | 44.5 | 105   | 36   | 27   | 15.5 | 31   | 39   |
| 10504 | 22    | 17   | 18.5 | 48    | 26   | 20   | 9    | 37   | 39   |
| 10505 | 52    | 22   | 22   | 74    | 28   | 27   | 13   | 40   | 18   |
| 10506 | 143.5 | 77   | 98   | 406   | 70   | 64   | 89   | 287  | 90   |
| 10507 | 28    | 15   | 11   | 43    | 26   | 21   | 8    | 16.5 | 13   |
| 10508 | 51    | 32   | 26   | 75.5  | 28   | 33   | 16   | 29   | 35   |
| 10509 | 42.5  | 22   | 30   | 66    | 31   | 28   | 30   | 85   | 21   |
| 10510 | 19    | 18   | 14   | 46    | 88   | 19   | 14.5 | 16   | 15   |
| 10511 | 27.5  | 17   | 15   | 98.5  | 26.5 | 21   | 11   | 42   | 14   |
| 10512 | 16.5  | 13.5 | 7    | 22    | 19.5 | 18   | 243  | 10   | 8    |
| 10513 | 17    | 14   | 9.5  | 41.5  | 20   | 19.5 | 9    | 14   | 14   |
| 10514 | 21    | 14   | 12   | 51    | 23   | 19   | 9.5  | 13   | 15   |
| 10515 | 14    | 12   | 8    | 44    | 23   | 18   | 7    | 18   | 13   |
| 10516 | 15    | 14   | 10   | 73    | 24   | 14.5 | 9    | 13   | 9    |
| 10517 | 17    | 12   | 9    | 46    | 24   | 16   | 9    | 11   | 11   |
| 10518 | 30    | 14   | 8    | 43.5  | 31   | 17   | 7.5  | 48   | 10   |
| 10519 | 28    | 18   | 21   | 55    | 27   | 21   | 9    | 23   | 19   |
| 10520 | 14.5  | 13   | 8    | 17    | 23   | 16   | 8.5  | 11.5 | 9    |
| 10521 | 49    | 21   | 19   | 114   | 40   | 28.5 | 15   | 43   | 22   |
| 10522 | 33    | 20   | 14   | 38    | 36   | 22   | 12   | 18   | 15   |
| 10523 | 20.5  | 14   | 14   | 80    | 26.5 | 17   | 11   | 18.5 | 16   |
| 10524 | 22    | 13   | 12   | 39    | 34   | 17   | 10   | 14   | 17   |
| 10525 | 18    | 9    | 12   | 76.5  | 21   | 13   | 12   | 14   | 8    |
| 10526 | 27    | 11   | 15   | 79.5  | 42   | 14.5 | 8    | 20   | 12   |

|       |       |      |      |       |      |      |      |      |       |
|-------|-------|------|------|-------|------|------|------|------|-------|
| 10527 | 20    | 14   | 11   | 70    | 25.5 | 19   | 21   | 17   | 11    |
| 10528 | 15    | 11   | 12   | 38    | 21   | 13   | 15   | 12   | 8     |
| 10529 | 19    | 12   | 10   | 41    | 30   | 15   | 13   | 17   | 11    |
| 10530 | 30    | 13   | 23.5 | 75    | 27   | 18   | 10   | 28   | 31    |
| 10531 | 19.5  | 20   | 12   | 58    | 27   | 24   | 9    | 17   | 11    |
| 10532 | 23    | 14   | 11   | 72    | 21   | 13   | 9    | 14   | 12    |
| 10533 | 18.5  | 12   | 8.5  | 54    | 22   | 15   | 10   | 22   | 14    |
| 10534 | 21    | 15   | 14   | 41.5  | 51.5 | 16   | 11   | 12   | 10    |
| 10535 | 92.5  | 19   | 21   | 99.5  | 33   | 31.5 | 23   | 212  | 23    |
| 10536 | 23    | 16   | 16.5 | 94    | 36   | 18.5 | 12   | 17   | 29    |
| 10537 | 115.5 | 27   | 32   | 118   | 47   | 31   | 26   | 149  | 76.5  |
| 10538 | 28.5  | 13   | 8    | 25    | 21   | 16   | 8    | 13   | 11    |
| 10539 | 41    | 16   | 12   | 51    | 25   | 21   | 12   | 15   | 13.5  |
| 10540 | 22    | 12   | 12   | 38    | 28   | 16   | 9    | 18   | 25    |
| 10541 | 18    | 17   | 13   | 58.5  | 19   | 15.5 | 9    | 16   | 68    |
| 10542 | 20    | 15   | 16   | 64    | 19   | 19   | 10   | 18   | 39    |
| 10543 | 17    | 14   | 15   | 58    | 20.5 | 16   | 8    | 16   | 25    |
| 10544 | 26.5  | 23   | 17   | 62    | 24   | 21   | 15   | 25   | 24    |
| 10545 | 26    | 23   | 16   | 80    | 18   | 22   | 11   | 28   | 56    |
| 10546 | 22    | 18   | 13   | 50    | 20   | 16   | 9.5  | 20   | 56    |
| 10547 | 32    | 15   | 14   | 70.5  | 25   | 20   | 10   | 19   | 16    |
| 10548 | 25    | 14   | 11   | 44    | 30.5 | 16   | 9    | 16   | 17    |
| 10549 | 47    | 14   | 12   | 50    | 24   | 29   | 9    | 43   | 24    |
| 10550 | 39    | 18   | 19   | 70    | 37.5 | 21   | 18   | 79   | 17.5  |
| 10551 | 86.5  | 15   | 15   | 61    | 44   | 21   | 19   | 47.5 | 18    |
| 10552 | 43    | 15   | 12   | 41    | 20   | 21   | 13   | 15   | 19    |
| 10553 | 28    | 17   | 13   | 44    | 76   | 21   | 13   | 23   | 37    |
| 10554 | 33    | 21   | 19   | 96    | 28   | 22   | 16   | 37   | 106   |
| 10555 | 28.5  | 15   | 16   | 59.5  | 29   | 21   | 11   | 71   | 15    |
| 10556 | 20    | 13   | 18   | 57    | 64   | 17   | 12   | 57   | 26    |
| 10557 | 29    | 17   | 46   | 90    | 36   | 21   | 12   | 42   | 164.5 |
| 10558 | 29    | 14   | 19   | 84.5  | 82.5 | 19   | 16.5 | 154  | 12    |
| 10559 | 38    | 19   | 24   | 133   | 22.5 | 30   | 16   | 35.5 | 19    |
| 10560 | 33    | 31   | 24   | 66.5  | 29   | 25   | 14   | 31   | 38    |
| 10561 | 29    | 33.5 | 24   | 82    | 29.5 | 29   | 19   | 39   | 39    |
| 10562 | 34    | 43.5 | 25   | 102   | 29   | 27   | 20   | 44   | 54.5  |
| 10563 | 26    | 21.5 | 20   | 69.5  | 28   | 22   | 13   | 33   | 23    |
| 10564 | 43    | 45   | 24   | 105.5 | 28.5 | 33   | 19   | 41   | 42    |
| 10565 | 32.5  | 46   | 63.5 | 82.5  | 27   | 32.5 | 20.5 | 45   | 44    |
| 10566 | 52    | 52.5 | 25   | 107   | 30   | 48   | 18   | 37   | 53    |
| 10567 | 38.5  | 45   | 28   | 114   | 31   | 34   | 21   | 43   | 53    |
| 10568 | 43.5  | 79   | 40   | 112   | 45   | 47.5 | 38   | 78   | 72    |
| 10569 | 34.5  | 42   | 26   | 96    | 28   | 26   | 22   | 43   | 52.5  |
| 10570 | 34    | 34   | 23   | 76.5  | 27   | 30.5 | 15   | 37   | 38    |
| 10571 | 49.5  | 39.5 | 26   | 121   | 166  | 38   | 22   | 55   | 41    |
| 10572 | 42    | 63   | 31   | 117   | 36   | 39   | 27   | 61   | 85    |
| 10573 | 54    | 52   | 29   | 94    | 29   | 61   | 22   | 46   | 53.5  |

|       |      |      |      |       |       |      |      |      |      |
|-------|------|------|------|-------|-------|------|------|------|------|
| 10574 | 31.5 | 38   | 23   | 83    | 26.5  | 30.5 | 18   | 40   | 48   |
| 10575 | 51.5 | 56.5 | 30   | 102   | 32    | 37   | 23   | 54   | 69   |
| 10576 | 36   | 52   | 31   | 98    | 33    | 37   | 27   | 53.5 | 55   |
| 10577 | 53   | 52   | 28   | 88    | 40.5  | 48.5 | 20.5 | 55   | 55.5 |
| 10578 | 27   | 34   | 19   | 76.5  | 23.5  | 28   | 13   | 32   | 47   |
| 10579 | 32.5 | 36   | 24   | 93    | 31    | 26   | 27   | 41   | 42.5 |
| 10580 | 28   | 33   | 23.5 | 91    | 27.5  | 29   | 17.5 | 36   | 43   |
| 10581 | 41   | 53   | 29   | 93    | 34    | 42   | 25   | 49.5 | 60   |
| 10582 | 35.5 | 38   | 24   | 93.5  | 29    | 29   | 20   | 42   | 61   |
| 10583 | 25   | 21.5 | 16   | 63    | 21    | 18   | 11   | 31   | 23   |
| 10584 | 42   | 53   | 30   | 105   | 35    | 35   | 24   | 71.5 | 76   |
| 10585 | 30   | 42   | 24   | 96.5  | 27    | 26.5 | 19   | 39   | 71   |
| 10586 | 35   | 44   | 27   | 101   | 30    | 31   | 23   | 43   | 42   |
| 10587 | 36   | 48   | 26   | 82    | 31    | 35   | 22   | 47   | 51   |
| 10588 | 37.5 | 47   | 25   | 92    | 35    | 33.5 | 21   | 40   | 53   |
| 10589 | 31.5 | 39   | 24   | 93.5  | 23    | 30   | 17   | 35.5 | 42   |
| 10590 | 28   | 34   | 21   | 86    | 25    | 22   | 16   | 37   | 36   |
| 10591 | 37   | 46.5 | 24   | 70.5  | 22    | 40   | 21   | 57   | 48   |
| 10592 | 42   | 50   | 29   | 102   | 32    | 35   | 31   | 54   | 48.5 |
| 10593 | 41   | 68.5 | 37   | 100   | 37    | 48   | 29   | 65   | 80   |
| 10594 | 71.5 | 54   | 32.5 | 88.5  | 34    | 41   | 29.5 | 56   | 55.5 |
| 10595 | 106  | 63   | 35   | 148   | 33    | 56.5 | 28   | 61   | 68.5 |
| 10596 | 59   | 58.5 | 30   | 103.5 | 28    | 66   | 22   | 48.5 | 60   |
| 10597 | 12   | 12   | 6    | 10    | 8     | 14   | 6    | 11   | 6    |
| 10598 | 24   | 26   | 18   | 84    | 24    | 20   | 14   | 26   | 28   |
| 10599 | 24   | 23   | 18   | 59.5  | 21    | 20   | 14   | 29   | 29   |
| 10600 | 27   | 40   | 30   | 95.5  | 134.5 | 29   | 18   | 43   | 46   |
| 10601 | 25.5 | 27   | 17   | 87    | 25    | 23.5 | 13   | 27   | 35   |
| 10602 | 38.5 | 31   | 19   | 87    | 21.5  | 23   | 14   | 34   | 33   |
| 10603 | 23.5 | 25   | 18   | 70    | 23    | 21   | 15   | 28   | 68.5 |
| 10604 | 39   | 31   | 20   | 90.5  | 24.5  | 31.5 | 15   | 29   | 36   |
| 10605 | 24   | 21   | 16   | 63.5  | 21    | 19   | 12   | 26   | 24.5 |
| 10606 | 35   | 55   | 28   | 96    | 29    | 35   | 25   | 53   | 74   |
| 10607 | 32.5 | 28   | 22   | 90.5  | 24    | 22   | 14   | 33   | 24   |
| 10608 | 36.5 | 48   | 31.5 | 118   | 43    | 30   | 24   | 65   | 59   |
| 10609 | 25   | 19   | 21   | 86    | 25    | 24   | 14   | 26   | 27   |
| 10610 | 31   | 42.5 | 27   | 79    | 31    | 29   | 18   | 48   | 47   |
| 10611 | 40   | 37   | 23   | 118   | 27.5  | 31   | 18   | 41.5 | 48   |
| 10612 | 57   | 41   | 26   | 101   | 27    | 40   | 18   | 38   | 72.5 |
| 10613 | 35.5 | 31   | 21   | 96    | 27    | 28.5 | 15   | 33   | 41   |
| 10614 | 33   | 21   | 19   | 79    | 23    | 27   | 10   | 16   | 23   |
| 10615 | 32   | 24   | 26   | 78.5  | 33    | 30   | 54   | 39   | 31   |
| 10616 | 173  | 27   | 29   | 59    | 49    | 38   | 30   | 36   | 35   |
| 10617 | 45   | 22   | 24   | 33    | 29.5  | 24.5 | 15   | 17   | 33   |
| 10618 | 27   | 22   | 20   | 24    | 34.5  | 29   | 25   | 14   | 22   |
| 10619 | 18.5 | 19.5 | 15   | 27    | 22    | 21   | 14   | 14   | 16   |
| 10620 | 98   | 23   | 16   | 57    | 102   | 26.5 | 13   | 67   | 18   |

|       |      |      |      |       |       |       |      |      |       |
|-------|------|------|------|-------|-------|-------|------|------|-------|
| 10621 | 27   | 22   | 24   | 62    | 26    | 32.5  | 12   | 62   | 15    |
| 10622 | 23   | 19   | 21   | 72    | 31    | 24    | 9    | 18   | 19    |
| 10623 | 11   | 17   | 8    | 14    | 12    | 21    | 7    | 8    | 10    |
| 10624 | 19   | 17.5 | 14   | 51    | 31    | 21    | 10   | 15   | 13    |
| 10625 | 19   | 16   | 16   | 114.5 | 19.5  | 23    | 8    | 19   | 11    |
| 10626 | 59   | 18   | 14   | 40    | 28.5  | 23    | 10   | 14   | 13    |
| 10627 | 23   | 30   | 21.5 | 70.5  | 102.5 | 25    | 11   | 18   | 15    |
| 10628 | 29   | 17.5 | 17   | 65    | 31    | 26    | 11   | 28   | 17    |
| 10629 | 24   | 21   | 14   | 47    | 21    | 27    | 11   | 32.5 | 17    |
| 10630 | 16   | 17   | 13   | 53    | 33    | 20    | 9    | 13   | 13    |
| 10631 | 21   | 24   | 15   | 39    | 25    | 23    | 11   | 24   | 21    |
| 10632 | 18   | 17   | 12   | 44.5  | 18.5  | 20    | 9    | 17.5 | 11.5  |
| 10633 | 29   | 39   | 23.5 | 65    | 28    | 32    | 15   | 44   | 36    |
| 10634 | 94   | 56   | 28   | 74.5  | 30    | 104.5 | 18   | 38   | 68    |
| 10635 | 34.5 | 43   | 27   | 87    | 32.5  | 38    | 20   | 42.5 | 38    |
| 10636 | 36.5 | 40   | 22   | 72.5  | 29    | 39.5  | 14   | 35   | 35.5  |
| 10637 | 41.5 | 43   | 29   | 90    | 33    | 34    | 24   | 53   | 48    |
| 10638 | 42   | 79   | 45   | 113   | 47    | 43    | 33   | 73   | 66    |
| 10639 | 25.5 | 33   | 26   | 82    | 27.5  | 30    | 17.5 | 37   | 63    |
| 10640 | 36   | 35   | 26   | 88    | 28    | 30    | 18   | 42   | 32    |
| 10641 | 50.5 | 77   | 42   | 105   | 69.5  | 55    | 33   | 75.5 | 84    |
| 10642 | 36   | 47.5 | 29   | 79    | 31    | 35    | 19   | 38   | 40.5  |
| 10643 | 66   | 47   | 30   | 95    | 34    | 41.5  | 28   | 46   | 55    |
| 10644 | 55.5 | 40.5 | 28   | 94.5  | 31    | 35    | 19   | 43   | 36.5  |
| 10645 | 31.5 | 50.5 | 34   | 103.5 | 34    | 36    | 23.5 | 46.5 | 47    |
| 10646 | 43   | 42   | 37   | 116   | 48    | 35    | 27   | 46   | 46    |
| 10647 | 55   | 53   | 36   | 99.5  | 41    | 43    | 24   | 48   | 46    |
| 10648 | 37   | 46   | 30   | 82    | 32.5  | 35    | 20   | 43.5 | 56    |
| 10649 | 36   | 64.5 | 38   | 98    | 39.5  | 45    | 32   | 63   | 75    |
| 10650 | 41   | 39   | 33.5 | 87.5  | 29.5  | 34    | 19   | 40   | 37    |
| 10651 | 40   | 46   | 29   | 77.5  | 34    | 37    | 18.5 | 40.5 | 44    |
| 10652 | 37   | 21   | 21   | 78    | 22    | 26    | 9.5  | 19   | 23    |
| 10653 | 34   | 17   | 28   | 89.5  | 27    | 19    | 13   | 23   | 12    |
| 10654 | 10   | 14   | 8    | 11    | 18    | 16    | 7    | 9.5  | 8     |
| 10655 | 18   | 17   | 13   | 67.5  | 23.5  | 18    | 9    | 49   | 17    |
| 10656 | 27   | 18   | 18   | 69    | 27.5  | 23    | 24   | 40   | 12    |
| 10657 | 32   | 19   | 16   | 73.5  | 47.5  | 34    | 12   | 17   | 20.5  |
| 10658 | 36   | 21   | 27   | 124.5 | 26    | 33    | 12   | 30.5 | 16    |
| 10659 | 43   | 31   | 21   | 88    | 27    | 29    | 16   | 33   | 59    |
| 10660 | 30   | 20   | 21.5 | 83    | 23    | 22    | 13   | 26   | 86.5  |
| 10661 | 31   | 18   | 30   | 76    | 45.5  | 20    | 13   | 44   | 89    |
| 10662 | 55   | 25   | 39   | 129   | 28    | 28    | 19   | 75.5 | 134   |
| 10663 | 23   | 16   | 18   | 51    | 55    | 20.5  | 11   | 17   | 117   |
| 10664 | 939  | 164  | 31   | 106   | 66    | 833   | 26   | 93   | 288.5 |
| 10665 | 32   | 18   | 18   | 53    | 31    | 23.5  | 23   | 23   | 17    |
| 10666 | 41.5 | 18   | 17   | 50    | 65    | 22    | 15   | 21   | 21    |
| 10667 | 20   | 18   | 19   | 67    | 19.5  | 16    | 8    | 17   | 56    |

|       |      |      |      |       |      |      |      |       |      |
|-------|------|------|------|-------|------|------|------|-------|------|
| 10668 | 28   | 18   | 15   | 48    | 25   | 19   | 11   | 16    | 26.5 |
| 10669 | 22   | 23   | 16   | 46    | 30   | 20   | 11   | 17    | 37   |
| 10670 | 20   | 20   | 19   | 51    | 22   | 18   | 10   | 19    | 32   |
| 10671 | 28   | 16.5 | 14.5 | 58.5  | 24   | 19.5 | 12   | 20    | 38   |
| 10672 | 32.5 | 17   | 25   | 72.5  | 22   | 21   | 12   | 21    | 40   |
| 10673 | 26   | 19   | 16   | 51.5  | 22   | 21.5 | 9    | 17    | 23.5 |
| 10674 | 18   | 18   | 14   | 64    | 17.5 | 22   | 10   | 18    | 35   |
| 10675 | 19   | 16   | 13   | 28    | 17   | 18   | 10   | 25    | 29   |
| 10676 | 14   | 11   | 15   | 27    | 19   | 16   | 8    | 14    | 12   |
| 10677 | 24.5 | 14   | 13   | 25    | 29   | 18   | 10.5 | 17    | 12   |
| 10678 | 21   | 14   | 16   | 64    | 20   | 17   | 10   | 19    | 14   |
| 10679 | 36   | 22   | 18.5 | 43    | 87   | 35   | 18.5 | 32    | 19   |
| 10680 | 14   | 13   | 9    | 25    | 21   | 16   | 7    | 20    | 9    |
| 10681 | 15   | 14   | 9    | 49    | 15   | 16   | 6    | 13    | 9    |
| 10682 | 52   | 17   | 15   | 51.5  | 121  | 21   | 16   | 23    | 31   |
| 10683 | 12.5 | 13   | 9    | 36.5  | 19.5 | 14   | 6    | 11    | 28   |
| 10684 | 13.5 | 13   | 10   | 29    | 21   | 15.5 | 8    | 17    | 9    |
| 10685 | 62   | 72   | 43.5 | 120   | 43   | 60   | 31   | 61.5  | 109  |
| 10686 | 48.5 | 61   | 38   | 112   | 39   | 44.5 | 25   | 54.5  | 74   |
| 10687 | 40.5 | 50   | 33   | 122   | 41   | 44.5 | 30   | 48    | 87   |
| 10688 | 64   | 81   | 37   | 164.5 | 62.5 | 65   | 34   | 152.5 | 83.5 |
| 10689 | 57.5 | 79   | 41   | 126   | 45.5 | 60.5 | 28   | 67    | 78   |
| 10690 | 63   | 92   | 59   | 147   | 84.5 | 62   | 35   | 80    | 97.5 |
| 10691 | 39   | 43   | 26   | 101   | 61.5 | 37   | 20   | 35    | 41   |
| 10692 | 49   | 56   | 34.5 | 88    | 34   | 46.5 | 23   | 44    | 57   |
| 10693 | 52.5 | 54   | 37   | 101   | 33   | 45   | 26   | 52    | 84.5 |
| 10694 | 45   | 57   | 32   | 129   | 36   | 44.5 | 23   | 58    | 72   |
| 10695 | 49   | 57   | 33   | 131   | 37.5 | 48   | 29   | 49    | 75   |
| 10696 | 43   | 25   | 18.5 | 161   | 42   | 35   | 12   | 26    | 42   |
| 10697 | 54   | 69   | 41   | 124   | 48   | 53   | 33   | 62    | 68   |
| 10698 | 44   | 50   | 32   | 117.5 | 31   | 46   | 21   | 63.5  | 48   |
| 10699 | 43.5 | 55   | 39   | 139   | 38   | 49   | 31   | 56    | 86   |
| 10700 | 47   | 63   | 37   | 114   | 40   | 45   | 28   | 54    | 77   |
| 10701 | 41   | 53   | 34   | 134   | 36   | 44   | 29.5 | 55    | 82   |
| 10702 | 144  | 44   | 30   | 99    | 28.5 | 35   | 18   | 42    | 48   |
| 10703 | 40   | 45   | 29   | 106   | 30   | 37.5 | 21   | 38    | 40   |
| 10704 | 80   | 61.5 | 29   | 116   | 31   | 61   | 25   | 50.5  | 54   |
| 10705 | 45.5 | 44   | 28   | 102.5 | 30   | 43   | 21   | 47    | 57   |
| 10706 | 58.5 | 66   | 37   | 121   | 39.5 | 57   | 30   | 74    | 88   |
| 10707 | 40.5 | 50.5 | 34   | 109   | 33.5 | 43   | 26   | 76    | 46   |
| 10708 | 61   | 49.5 | 31   | 135   | 24.5 | 51   | 17   | 41.5  | 45   |
| 10709 | 37   | 50   | 35   | 113   | 34   | 43   | 23   | 50    | 48   |
| 10710 | 59   | 70   | 41   | 106   | 44.5 | 48.5 | 31.5 | 100   | 73   |
| 10711 | 43   | 36   | 26   | 125   | 27   | 40   | 16   | 33    | 34   |
| 10712 | 46   | 53   | 29   | 108   | 27   | 45   | 19   | 48.5  | 58   |
| 10713 | 28   | 20   | 16.5 | 84.5  | 24.5 | 23   | 10   | 20    | 46   |
| 10714 | 50   | 66   | 42   | 177   | 41   | 38   | 31   | 71    | 77   |

|       |       |      |      |       |      |      |      |       |      |
|-------|-------|------|------|-------|------|------|------|-------|------|
| 10715 | 73    | 63   | 46   | 135.5 | 42   | 55   | 25.5 | 53.5  | 89.5 |
| 10716 | 43    | 35   | 21.5 | 141.5 | 61.5 | 41   | 21   | 35.5  | 42.5 |
| 10717 | 32.5  | 35   | 20   | 98    | 25   | 32   | 17   | 32    | 35   |
| 10718 | 51    | 51   | 35.5 | 134.5 | 35   | 39   | 22   | 56    | 87   |
| 10719 | 56    | 53.5 | 29   | 123.5 | 33   | 41   | 24   | 60    | 71   |
| 10720 | 32.5  | 34   | 23   | 114   | 41   | 38   | 18   | 36.5  | 46   |
| 10721 | 48    | 57   | 30   | 118   | 38   | 57   | 22   | 47    | 62   |
| 10722 | 41.5  | 52   | 30   | 126   | 32.5 | 36   | 21   | 49    | 62   |
| 10723 | 16    | 16.5 | 9    | 52    | 17   | 22   | 7    | 19    | 12   |
| 10724 | 32    | 19   | 20   | 135   | 28   | 30   | 26   | 23    | 44   |
| 10725 | 20    | 18   | 10.5 | 62.5  | 27   | 24   | 8    | 15    | 14   |
| 10726 | 24    | 22   | 15   | 70    | 21   | 25   | 9    | 16    | 21   |
| 10727 | 30    | 18   | 19   | 130   | 37   | 26   | 19   | 27    | 18.5 |
| 10728 | 17    | 14   | 10   | 50    | 17   | 21   | 7    | 12.5  | 10   |
| 10729 | 47    | 21   | 16   | 42    | 40   | 27   | 20   | 67    | 19   |
| 10730 | 43    | 25   | 22   | 132   | 50.5 | 32   | 22   | 113.5 | 39   |
| 10731 | 439.5 | 20   | 16   | 48.5  | 27   | 30   | 25   | 67    | 21   |
| 10732 | 36    | 20   | 18   | 42    | 41   | 29   | 15   | 22    | 43   |
| 10733 | 35    | 18   | 15   | 89    | 71   | 26.5 | 12   | 48    | 16   |
| 10734 | 48    | 20   | 18   | 71    | 50   | 34   | 32   | 22.5  | 26   |
| 10735 | 38    | 22   | 20   | 51    | 43.5 | 25   | 39   | 27    | 47   |
| 10736 | 30.5  | 22   | 18   | 83    | 23   | 32   | 11   | 21    | 42.5 |
| 10737 | 22    | 12   | 12   | 63    | 23   | 18   | 9    | 24    | 17   |
| 10738 | 34    | 16.5 | 12   | 48    | 31.5 | 24   | 10   | 16    | 13   |
| 10739 | 25    | 16   | 12   | 88    | 18.5 | 23   | 14   | 20    | 12   |
| 10740 | 44    | 19   | 13   | 46    | 883  | 27   | 24.5 | 15    | 15   |
| 10741 | 59    | 15   | 12   | 62    | 20   | 22   | 11   | 19    | 14   |
| 10742 | 40.5  | 22   | 18   | 83    | 26.5 | 27   | 10   | 26    | 60   |
| 10743 | 26    | 17.5 | 14   | 58.5  | 18   | 22   | 9    | 16    | 19   |
| 10744 | 41    | 50.5 | 26   | 68    | 39   | 34   | 16   | 38    | 36   |
| 10745 | 29    | 26   | 22   | 209.5 | 18   | 31.5 | 11   | 77    | 33.5 |
| 10746 | 30    | 16   | 16   | 79    | 18   | 22   | 11   | 18    | 19   |
| 10747 | 20    | 13.5 | 16   | 55    | 15.5 | 24   | 5    | 11    | 9    |
| 10748 | 16    | 15   | 10   | 62    | 22   | 17   | 8    | 16    | 9    |
| 10749 | 24    | 15   | 10   | 90.5  | 15   | 18   | 8    | 17    | 33   |
| 10750 | 15    | 13.5 | 8    | 30    | 16   | 17   | 7    | 11    | 9    |
| 10751 | 13    | 13   | 9    | 37.5  | 10   | 19.5 | 7    | 10    | 9    |
| 10752 | 20.5  | 15   | 9    | 73    | 12   | 19   | 7    | 17    | 8    |
| 10753 | 19    | 14   | 8    | 61    | 11   | 21   | 7    | 12    | 9    |
| 10754 | 16    | 15   | 13   | 72    | 15.5 | 20   | 9    | 13    | 10   |
| 10755 | 16    | 15   | 9    | 71    | 14   | 19   | 7    | 13    | 9    |
| 10756 | 10    | 16   | 9    | 116   | 3    | 9    | 5    | 7     | 9    |
| 10757 | 22    | 16.5 | 13   | 100.5 | 24.5 | 21   | 10   | 17.5  | 18   |
| 10758 | 16.5  | 14   | 11.5 | 77    | 17   | 17   | 7    | 12    | 11   |
| 10759 | 25    | 24   | 14   | 109.5 | 17   | 20   | 10   | 16    | 15   |
| 10760 | 16    | 15   | 13   | 65    | 15   | 18   | 7    | 16    | 10   |
| 10761 | 22    | 58   | 12   | 83    | 18   | 20.5 | 8    | 27    | 12   |

|       |      |      |      |       |      |      |      |      |       |
|-------|------|------|------|-------|------|------|------|------|-------|
| 10762 | 18   | 12   | 9    | 56    | 12.5 | 14   | 7    | 14   | 8     |
| 10763 | 24   | 21.5 | 18   | 69.5  | 18   | 29.5 | 9    | 15   | 14    |
| 10764 | 12   | 11   | 5    | 19    | 10   | 14.5 | 7    | 9    | 7     |
| 10765 | 27   | 15   | 25   | 172   | 38   | 20   | 16   | 23.5 | 16    |
| 10766 | 20   | 14   | 12   | 93    | 16.5 | 16.5 | 7    | 16   | 24    |
| 10767 | 18   | 13   | 10   | 52.5  | 13   | 17   | 7    | 12   | 11    |
| 10768 | 43   | 17   | 19   | 148   | 21   | 23   | 21.5 | 32   | 12    |
| 10769 | 28.5 | 15   | 12   | 92    | 28   | 17   | 12   | 18.5 | 10    |
| 10770 | 22   | 17   | 16   | 74    | 21   | 22   | 11   | 14   | 109   |
| 10771 | 18   | 13   | 9    | 28    | 22   | 19   | 9    | 12   | 21    |
| 10772 | 37   | 20.5 | 17   | 78    | 28   | 23.5 | 235  | 26   | 32    |
| 10773 | 47   | 15   | 12   | 57    | 23   | 21   | 9    | 15   | 22    |
| 10774 | 43   | 17   | 15   | 48.5  | 30   | 25.5 | 19   | 61   | 22    |
| 10775 | 93   | 16   | 15.5 | 91    | 35   | 25   | 23   | 60   | 23    |
| 10776 | 18   | 11.5 | 10   | 89.5  | 17.5 | 14   | 8    | 15   | 10    |
| 10777 | 24   | 18   | 19   | 47    | 33   | 19   | 11   | 20   | 43    |
| 10778 | 40   | 16   | 44   | 112   | 27.5 | 22   | 13   | 29   | 96    |
| 10779 | 27   | 13   | 22   | 50    | 26.5 | 21   | 14   | 111  | 13    |
| 10780 | 15   | 14   | 10   | 48    | 41.5 | 17   | 9    | 20   | 9     |
| 10781 | 38   | 60.5 | 27.5 | 117   | 29   | 34.5 | 22   | 56   | 67    |
| 10782 | 49   | 37.5 | 23   | 152   | 23.5 | 40.5 | 18   | 42   | 40    |
| 10783 | 52   | 40   | 29   | 94    | 26   | 48   | 18   | 39   | 129.5 |
| 10784 | 34   | 42   | 27   | 90    | 25.5 | 28   | 19   | 42   | 41    |
| 10785 | 49.5 | 38   | 19   | 83    | 22   | 50   | 17   | 35   | 44    |
| 10786 | 33   | 30   | 22   | 94    | 24   | 25   | 14   | 33   | 80    |
| 10787 | 29   | 32   | 30   | 88.5  | 24   | 27.5 | 16.5 | 34   | 33    |
| 10788 | 34   | 31   | 23   | 104   | 28   | 28   | 17   | 43.5 | 32    |
| 10789 | 53.5 | 49   | 28.5 | 87    | 32   | 49   | 25   | 52   | 53    |
| 10790 | 30   | 38   | 21   | 96.5  | 22.5 | 29   | 19   | 38   | 38    |
| 10791 | 26   | 17   | 13   | 50    | 36.5 | 20.5 | 8    | 19   | 15    |
| 10792 | 39   | 43   | 23   | 106   | 26   | 34   | 17   | 41   | 66    |
| 10793 | 22   | 20   | 14   | 67    | 19   | 20   | 11   | 22   | 23    |
| 10794 | 37   | 45   | 27   | 101.5 | 36   | 31.5 | 19   | 50   | 43    |
| 10795 | 34.5 | 32   | 22   | 88.5  | 25.5 | 24   | 16   | 50.5 | 37.5  |
| 10796 | 30.5 | 24   | 20.5 | 82    | 22.5 | 24   | 13   | 57   | 37    |
| 10797 | 41   | 42   | 24.5 | 126   | 53   | 40   | 20   | 41   | 78    |
| 10798 | 38.5 | 40.5 | 27   | 125   | 30   | 28   | 21   | 49   | 49    |
| 10799 | 33.5 | 44   | 31   | 126.5 | 28   | 32   | 21   | 48   | 64.5  |
| 10800 | 36   | 51   | 30   | 113   | 24   | 29   | 17   | 41   | 42    |
| 10801 | 42.5 | 41   | 26   | 98    | 27   | 33.5 | 20   | 46   | 42    |
| 10802 | 77   | 23   | 17   | 82    | 20   | 26   | 14   | 26   | 22    |
| 10803 | 70   | 57   | 37   | 113   | 44.5 | 42   | 36   | 84.5 | 87    |
| 10804 | 26.5 | 28.5 | 21   | 74    | 23   | 26   | 14   | 35   | 33    |
| 10805 | 33   | 26   | 23   | 89    | 23   | 25   | 16   | 33   | 32    |
| 10806 | 38   | 43   | 31   | 107   | 33   | 36   | 21   | 44   | 61.5  |
| 10807 | 30   | 32   | 20   | 81    | 22   | 24   | 14   | 32   | 36    |
| 10808 | 29   | 30   | 21.5 | 90    | 27   | 25   | 14.5 | 32   | 32    |



|       |      |      |      |       |      |      |      |      |      |
|-------|------|------|------|-------|------|------|------|------|------|
| 10809 | 30.5 | 18   | 16   | 87    | 18   | 24   | 10   | 27   | 23   |
| 10810 | 41   | 38   | 23   | 89    | 24   | 29   | 18   | 42   | 38   |
| 10811 | 52   | 33   | 19   | 109   | 22   | 52   | 15   | 34.5 | 37   |
| 10812 | 42   | 46   | 26   | 120   | 31   | 36   | 22   | 51   | 51   |
| 10813 | 54.5 | 37   | 20   | 92    | 24   | 49   | 13   | 32   | 44   |
| 10814 | 30   | 30   | 22   | 94    | 23.5 | 26   | 16   | 33   | 41   |
| 10815 | 38   | 39   | 29   | 83    | 32   | 30.5 | 22   | 45   | 39   |
| 10816 | 38   | 34   | 23   | 80    | 27   | 26   | 18   | 42   | 46   |
| 10817 | 31.5 | 35   | 26   | 95    | 28   | 24   | 17   | 39   | 34   |
| 10818 | 29   | 31   | 25   | 93    | 28   | 27.5 | 14   | 43   | 34   |
| 10819 | 34.5 | 40   | 26   | 122   | 30   | 33   | 19   | 43   | 50   |
| 10820 | 27   | 33   | 22   | 96.5  | 22   | 27.5 | 34   | 33   | 47   |
| 10821 | 29   | 40   | 26.5 | 80    | 65.5 | 32   | 19   | 37   | 53   |
| 10822 | 42   | 35   | 20   | 80    | 23   | 45   | 13.5 | 31   | 68   |
| 10823 | 30   | 32   | 20   | 81.5  | 20   | 25   | 15   | 35   | 35   |
| 10824 | 33   | 40   | 30   | 83    | 28   | 30   | 18   | 39.5 | 51.5 |
| 10825 | 33   | 38   | 26   | 101   | 24   | 32   | 17   | 35   | 45.5 |
| 10826 | 31   | 45   | 25.5 | 107   | 26.5 | 32   | 23   | 49   | 55   |
| 10827 | 26   | 23   | 24   | 66.5  | 20.5 | 25   | 11   | 27   | 28.5 |
| 10828 | 57.5 | 58   | 39.5 | 138   | 42   | 43   | 30   | 66   | 60   |
| 10829 | 36   | 44   | 22   | 106.5 | 32   | 35.5 | 17   | 40   | 49   |
| 10830 | 28   | 32.5 | 22   | 89.5  | 35   | 26.5 | 16   | 38   | 30   |
| 10831 | 54   | 41   | 36   | 110   | 37   | 34   | 23   | 79.5 | 50   |
| 10832 | 50   | 64   | 43   | 147   | 40   | 46   | 31   | 67.5 | 79   |
| 10833 | 44   | 31.5 | 24   | 118   | 22.5 | 25   | 19   | 36   | 34   |
| 10834 | 45   | 47.5 | 29   | 118   | 26   | 34   | 22   | 53   | 44   |
| 10835 | 95   | 58.5 | 39   | 117   | 30   | 40   | 26   | 75   | 76   |
| 10836 | 19   | 11   | 10   | 44    | 24   | 15   | 7    | 13   | 10   |
| 10837 | 32.5 | 13   | 14   | 70    | 20.5 | 16   | 25   | 26   | 32   |
| 10838 | 25   | 15.5 | 10   | 57    | 20.5 | 17   | 10   | 19   | 11   |
| 10839 | 23   | 13   | 9    | 65    | 25   | 21   | 8    | 16   | 10   |
| 10840 | 37   | 15   | 43   | 114.5 | 30   | 21   | 11   | 48   | 260  |
| 10841 | 46   | 17   | 15   | 83    | 26   | 31   | 10   | 46   | 14   |
| 10842 | 30   | 12   | 10   | 48    | 15   | 17   | 8    | 17   | 10   |
| 10843 | 52   | 16   | 19   | 132   | 30.5 | 21.5 | 13   | 43   | 19   |
| 10844 | 30   | 12   | 18   | 148.5 | 19.5 | 18   | 13   | 26   | 17   |
| 10845 | 19   | 12   | 13   | 72    | 17.5 | 18   | 9    | 30   | 32.5 |
| 10846 | 31.5 | 12   | 11   | 33    | 14.5 | 22   | 8    | 16   | 8    |
| 10847 | 17   | 18   | 15   | 53    | 21   | 23   | 9    | 14   | 24   |
| 10848 | 17   | 16   | 12   | 67    | 28   | 20   | 7    | 14   | 12   |
| 10849 | 19   | 18   | 14   | 73    | 25   | 20   | 9    | 16   | 14   |
| 10850 | 34   | 17   | 12.5 | 63    | 32   | 23   | 11   | 126  | 13   |
| 10851 | 20   | 17   | 13   | 59    | 25   | 22   | 10   | 19   | 21   |
| 10852 | 17   | 19   | 9    | 46.5  | 25   | 23   | 11   | 19   | 10   |
| 10853 | 25   | 18   | 11   | 74.5  | 30   | 26   | 9    | 20   | 16   |
| 10854 | 60   | 31   | 24   | 66    | 37   | 47.5 | 16   | 65   | 27.5 |
| 10855 | 30   | 18   | 18   | 56    | 34   | 21   | 13   | 19   | 17   |

|       |      |      |      |       |      |      |      |      |      |
|-------|------|------|------|-------|------|------|------|------|------|
| 10856 | 39.5 | 22   | 20   | 68    | 30   | 23   | 12   | 21   | 52   |
| 10857 | 30   | 19   | 33   | 92.5  | 37   | 23   | 32   | 31.5 | 25   |
| 10858 | 38.5 | 17   | 16   | 26    | 27   | 26   | 12   | 20   | 19   |
| 10859 | 24.5 | 19   | 14   | 34    | 27.5 | 25   | 10   | 17   | 18.5 |
| 10860 | 44   | 24   | 40   | 154   | 37   | 30   | 21   | 88.5 | 26   |
| 10861 | 73   | 42   | 35   | 109   | 42   | 35   | 30   | 52   | 58   |
| 10862 | 42.5 | 22   | 23   | 130   | 48   | 27   | 18   | 38   | 118  |
| 10863 | 54   | 20   | 32   | 155   | 54   | 28   | 22   | 28.5 | 36   |
| 10864 | 40.5 | 26   | 31   | 96    | 50.5 | 28   | 20   | 42   | 31   |
| 10865 | 41   | 19   | 18   | 147   | 40   | 26   | 18   | 32   | 29   |
| 10866 | 32   | 21   | 10   | 69.5  | 24.5 | 37   | 8    | 14   | 11   |
| 10867 | 76   | 71   | 50   | 120   | 46.5 | 58.5 | 31   | 63   | 89.5 |
| 10868 | 84   | 69   | 38   | 101   | 40.5 | 63   | 44   | 61   | 91   |
| 10869 | 46   | 49   | 36   | 117   | 40   | 45   | 23   | 44   | 66   |
| 10870 | 46.5 | 30   | 24   | 75    | 39   | 35   | 18   | 29   | 30.5 |
| 10871 | 54   | 71   | 43.5 | 111   | 45   | 49   | 39   | 63   | 103  |
| 10872 | 43   | 43   | 35   | 108   | 52   | 35   | 19   | 45   | 70   |
| 10873 | 43.5 | 45   | 30   | 102.5 | 35   | 37   | 22   | 44   | 55   |
| 10874 | 39.5 | 53   | 35   | 106   | 37   | 40   | 22   | 43   | 78   |
| 10875 | 36   | 33   | 28   | 124   | 27   | 32.5 | 14   | 32   | 36   |
| 10876 | 79   | 38   | 25   | 84    | 26   | 57   | 20   | 31   | 62   |
| 10877 | 54.5 | 44.5 | 35   | 124   | 35.5 | 48   | 22   | 43   | 49   |
| 10878 | 47   | 30   | 21   | 93.5  | 26   | 28.5 | 20   | 41   | 53   |
| 10879 | 41   | 38   | 25   | 92    | 44   | 31   | 17   | 41   | 47   |
| 10880 | 40.5 | 40.5 | 32   | 102.5 | 30   | 36   | 21   | 50   | 58   |
| 10881 | 43   | 31   | 34   | 92    | 33   | 33   | 23   | 32   | 52   |
| 10882 | 44   | 35   | 26   | 107   | 34.5 | 33   | 15   | 34   | 51   |
| 10883 | 53   | 40   | 29   | 93.5  | 40.5 | 36.5 | 22   | 43   | 55   |
| 10884 | 35   | 38   | 25   | 90    | 38   | 34   | 17   | 36   | 54   |
| 10885 | 42   | 45   | 28   | 84    | 43   | 37   | 20   | 42   | 51   |
| 10886 | 40.5 | 39   | 23   | 85.5  | 26.5 | 30   | 18   | 48   | 53   |
| 10887 | 30   | 27   | 22   | 81.5  | 29   | 27   | 14   | 28   | 46   |
| 10888 | 57   | 45   | 37   | 119   | 31.5 | 41   | 21.5 | 48   | 51   |
| 10889 | 42.5 | 41   | 34.5 | 93    | 37.5 | 33   | 24   | 63   | 53   |
| 10890 | 53   | 63.5 | 30   | 88    | 57   | 52   | 33.5 | 52   | 60   |
| 10891 | 25   | 22   | 22   | 86    | 39   | 24   | 12   | 25   | 26   |
| 10892 | 67.5 | 30   | 31   | 84    | 31   | 29   | 23   | 33   | 35   |
| 10893 | 35   | 39   | 31   | 90    | 71   | 28   | 18   | 45   | 46   |
| 10894 | 32   | 33   | 25   | 77    | 23.5 | 28   | 16   | 35   | 53   |
| 10895 | 70   | 41   | 36   | 124   | 31   | 32   | 20.5 | 44   | 40   |
| 10896 | 54.5 | 39   | 28   | 87    | 46   | 34   | 19.5 | 77.5 | 53   |
| 10897 | 39.5 | 35   | 22   | 89.5  | 26   | 32   | 15   | 33   | 50   |
| 10898 | 41   | 54   | 30   | 115   | 34   | 40   | 23   | 51   | 62   |
| 10899 | 56   | 74   | 41   | 113   | 34.5 | 56   | 27   | 60   | 72.5 |
| 10900 | 47   | 51   | 33.5 | 127   | 31   | 39   | 23   | 53   | 96   |
| 10901 | 48   | 56   | 33.5 | 89    | 31.5 | 38.5 | 23   | 53   | 58   |
| 10902 | 45   | 39   | 24   | 88    | 28   | 36   | 18.5 | 35   | 43   |

|       |      |      |      |       |      |      |      |       |      |
|-------|------|------|------|-------|------|------|------|-------|------|
| 10903 | 60.5 | 43   | 23   | 67    | 26   | 54   | 17   | 40    | 52   |
| 10904 | 40.5 | 51   | 41   | 96    | 37.5 | 33.5 | 23   | 46.5  | 73   |
| 10905 | 48   | 44   | 31   | 114   | 31   | 37   | 21   | 51    | 49   |
| 10906 | 48   | 44   | 29   | 89    | 37   | 34   | 19   | 52.5  | 56.5 |
| 10907 | 37   | 24   | 18   | 106   | 21   | 29   | 11   | 25    | 61   |
| 10908 | 43   | 15   | 10   | 46    | 16   | 19   | 9    | 67    | 13   |
| 10909 | 19   | 13.5 | 14   | 66.5  | 16   | 19   | 13   | 18    | 31   |
| 10910 | 28   | 16   | 19   | 105.5 | 20.5 | 23   | 12   | 35.5  | 28   |
| 10911 | 21   | 13   | 11   | 47.5  | 17   | 19   | 7    | 17    | 10   |
| 10912 | 25   | 14   | 13   | 66    | 17   | 20   | 7    | 15    | 9    |
| 10913 | 26.5 | 17   | 18   | 62    | 21   | 23   | 11   | 20    | 26   |
| 10914 | 48   | 16.5 | 26   | 98    | 23   | 21   | 13   | 38    | 44.5 |
| 10915 | 24   | 14   | 10   | 53    | 20   | 17   | 9    | 13    | 17   |
| 10916 | 26   | 17   | 23   | 58    | 26   | 21   | 10   | 21    | 24   |
| 10917 | 36   | 15.5 | 15   | 81.5  | 42.5 | 32   | 55   | 20    | 57   |
| 10918 | 24   | 17   | 16.5 | 57.5  | 24   | 20   | 30.5 | 26    | 25   |
| 10919 | 48   | 15   | 15   | 60    | 24   | 20   | 12   | 100   | 28   |
| 10920 | 18   | 14   | 11   | 19    | 13   | 18   | 7    | 14    | 9    |
| 10921 | 25   | 13   | 14   | 44    | 18   | 16   | 8    | 17    | 15   |
| 10922 | 20   | 12   | 10   | 31    | 25   | 18   | 7    | 14.5  | 10   |
| 10923 | 23   | 13   | 11   | 54    | 23.5 | 18   | 17   | 16    | 32   |
| 10924 | 23   | 16   | 14   | 39    | 15.5 | 20   | 9    | 12    | 37   |
| 10925 | 16   | 12   | 9    | 46    | 14   | 16   | 6    | 10    | 9    |
| 10926 | 62   | 21   | 11   | 72    | 17.5 | 60.5 | 7    | 16    | 17   |
| 10927 | 36   | 15   | 27   | 65    | 66   | 20   | 10   | 14    | 19   |
| 10928 | 62.5 | 14   | 11   | 39    | 21   | 20.5 | 11   | 48    | 12   |
| 10929 | 18   | 13   | 14   | 80    | 21   | 19   | 7    | 58.5  | 9    |
| 10930 | 23   | 13   | 14   | 50    | 35.5 | 19   | 8    | 59    | 10   |
| 10931 | 102  | 28   | 24   | 57    | 27   | 51   | 15   | 36.5  | 37   |
| 10932 | 74   | 26   | 27   | 108   | 51   | 37   | 22   | 36    | 39   |
| 10933 | 203  | 24   | 25   | 72    | 45.5 | 35   | 42   | 167   | 26   |
| 10934 | 47   | 17   | 22   | 56    | 62   | 24.5 | 14   | 117.5 | 21   |
| 10935 | 39   | 16   | 15   | 36.5  | 24   | 22   | 16   | 29.5  | 19   |
| 10936 | 40   | 18   | 19   | 37    | 21   | 23   | 12   | 19    | 18   |
| 10937 | 112  | 16   | 12   | 45    | 27   | 24   | 11   | 16    | 23   |
| 10938 | 19   | 11   | 11   | 49.5  | 22   | 13.5 | 8    | 12    | 10   |
| 10939 | 21   | 14   | 13   | 54    | 16   | 16   | 9    | 19    | 9    |
| 10940 | 16   | 7    | 9.5  | 31    | 23   | 10   | 9    | 18    | 6    |
| 10941 | 29   | 14   | 23.5 | 142.5 | 21   | 18   | 16   | 27    | 28.5 |
| 10942 | 15   | 12   | 9    | 35    | 13   | 15   | 6    | 10    | 8    |
| 10943 | 17   | 14   | 9    | 47    | 14   | 16.5 | 8    | 11    | 10.5 |
| 10944 | 24   | 13.5 | 12   | 27    | 19   | 16   | 14   | 16    | 12   |
| 10945 | 29   | 19   | 13   | 36.5  | 24   | 21   | 18   | 30    | 17.5 |
| 10946 | 31   | 14   | 16   | 73    | 23   | 24   | 33.5 | 18    | 118  |
| 10947 | 52   | 23   | 23   | 57    | 49.5 | 26   | 26   | 35    | 37   |
| 10948 | 30.5 | 13   | 14   | 37    | 22   | 18   | 10   | 15    | 19   |
| 10949 | 82.5 | 19   | 28.5 | 93    | 356  | 24   | 12   | 27    | 34   |

|       |       |      |       |       |      |      |       |      |       |
|-------|-------|------|-------|-------|------|------|-------|------|-------|
| 10950 | 43.5  | 20   | 25.5  | 49    | 24.5 | 33   | 15    | 33   | 19    |
| 10951 | 64.5  | 15   | 22    | 57    | 30   | 20   | 28    | 25   | 43    |
| 10952 | 65    | 19   | 15.5  | 107.5 | 171  | 27   | 19.5  | 44   | 21    |
| 10953 | 73    | 16   | 367   | 72    | 30   | 20.5 | 12    | 30   | 17.5  |
| 10954 | 24    | 19   | 16    | 63    | 18   | 21   | 15    | 20   | 20    |
| 10955 | 37    | 33   | 61    | 102   | 20   | 27   | 12    | 34   | 71    |
| 10956 | 23    | 26   | 16    | 55    | 16   | 20   | 11.5  | 22   | 27    |
| 10957 | 36    | 16   | 20    | 156.5 | 37.5 | 18.5 | 23    | 28.5 | 34    |
| 10958 | 55    | 20   | 22    | 68    | 35   | 28   | 12    | 91   | 12    |
| 10959 | 17    | 10   | 9     | 35.5  | 16   | 14   | 15    | 12   | 7     |
| 10960 | 37    | 15   | 16    | 98    | 61   | 19   | 17    | 33   | 76    |
| 10961 | 21    | 13   | 12    | 43    | 34.5 | 22   | 9     | 14   | 17    |
| 10962 | 877   | 129  | 115.5 | 205.5 | 485  | 151  | 286.5 | 451  | 129.5 |
| 10963 | 34    | 13   | 14    | 53    | 26   | 21   | 12    | 26.5 | 27    |
| 10964 | 30    | 16   | 19    | 66.5  | 23   | 23   | 11    | 24   | 100   |
| 10965 | 33    | 23   | 20    | 60    | 22   | 25   | 13    | 23   | 51    |
| 10966 | 142.5 | 16   | 16    | 51    | 22   | 24   | 14    | 107  | 30    |
| 10967 | 48.5  | 32.5 | 26    | 68.5  | 53.5 | 31   | 23.5  | 37   | 82    |
| 10968 | 22.5  | 13   | 14    | 75    | 22   | 18   | 10    | 34   | 42    |
| 10969 | 39    | 13   | 32    | 145   | 23.5 | 22   | 12    | 40   | 61    |
| 10970 | 20    | 12.5 | 19    | 41    | 21.5 | 17   | 13    | 21   | 16    |
| 10971 | 26.5  | 21   | 15    | 119   | 31   | 20   | 9     | 39   | 9     |
| 10972 | 28    | 28   | 21    | 68    | 24.5 | 22   | 15    | 33   | 30    |
| 10973 | 35.5  | 41   | 29    | 83    | 27.5 | 29   | 18    | 44   | 41    |
| 10974 | 39    | 53   | 27    | 103.5 | 28.5 | 36   | 25    | 52   | 62    |
| 10975 | 35    | 28   | 28    | 89    | 39   | 24   | 14    | 29.5 | 35    |
| 10976 | 98.5  | 54   | 28    | 97    | 32   | 35.5 | 24    | 59   | 56    |
| 10977 | 43    | 42   | 25    | 92.5  | 29   | 33   | 24    | 41   | 48    |
| 10978 | 26    | 29   | 19    | 69    | 19   | 23   | 12    | 32   | 31    |
| 10979 | 31    | 35   | 19    | 76    | 22.5 | 27   | 16    | 35   | 49    |
| 10980 | 48    | 49   | 29    | 90.5  | 29.5 | 40   | 23    | 49   | 50    |
| 10981 | 162   | 26   | 21    | 91.5  | 20   | 29   | 13    | 31   | 33    |
| 10982 | 25    | 30.5 | 25    | 59    | 24   | 24   | 16    | 30   | 28    |
| 10983 | 39    | 51   | 36.5  | 91    | 33.5 | 33   | 19    | 45   | 52    |
| 10984 | 37    | 22   | 21    | 103   | 27   | 23   | 11.5  | 25.5 | 32    |
| 10985 | 50    | 49   | 30    | 119   | 28   | 35   | 26    | 56   | 53    |
| 10986 | 43    | 64   | 40    | 128   | 33.5 | 45   | 28    | 60   | 69    |
| 10987 | 37    | 58   | 28    | 103.5 | 27   | 31   | 22    | 53   | 55    |
| 10988 | 35    | 48   | 30    | 106   | 93   | 35   | 24    | 48   | 99    |
| 10989 | 34.5  | 39.5 | 23    | 70.5  | 26.5 | 27   | 19    | 45   | 46    |
| 10990 | 20    | 21   | 17    | 67    | 23   | 19   | 16    | 21   | 26    |
| 10991 | 33    | 28   | 43    | 143   | 23   | 26   | 15    | 38   | 31    |
| 10992 | 26    | 32   | 18.5  | 71.5  | 19   | 24   | 15    | 34   | 34    |
| 10993 | 50    | 44   | 22    | 82    | 23   | 39   | 21.5  | 39   | 51    |
| 10994 | 34    | 39   | 23    | 95    | 31   | 31.5 | 17    | 38   | 44    |
| 10995 | 32    | 41   | 24    | 84.5  | 27   | 28   | 18.5  | 40   | 58    |
| 10996 | 45    | 55.5 | 31    | 126.5 | 47   | 39   | 28    | 58   | 56    |

|       |      |      |       |       |      |      |      |      |       |
|-------|------|------|-------|-------|------|------|------|------|-------|
| 10997 | 38   | 41   | 26    | 94    | 26   | 33   | 18   | 38   | 53    |
| 10998 | 57   | 43   | 28    | 89    | 27   | 46   | 28   | 41.5 | 52.5  |
| 10999 | 45   | 51   | 29.5  | 89    | 32   | 32   | 26.5 | 49   | 63    |
| 11000 | 28   | 33   | 22    | 108   | 20   | 26   | 14   | 36   | 26    |
| 11001 | 37   | 29   | 20    | 80    | 25   | 23   | 15   | 32   | 50.5  |
| 11002 | 26   | 24   | 19    | 85.5  | 19   | 19   | 13   | 30   | 24.5  |
| 11003 | 38.5 | 25   | 27    | 103   | 27   | 24   | 18   | 35   | 27    |
| 11004 | 26   | 43   | 22    | 81    | 24   | 28   | 18   | 40   | 43    |
| 11005 | 50.5 | 24   | 19    | 71    | 23.5 | 22   | 12   | 30   | 26    |
| 11006 | 49   | 52   | 30.5  | 95    | 25.5 | 40.5 | 21   | 54   | 63    |
| 11007 | 40.5 | 35   | 26.5  | 80    | 27.5 | 27   | 16   | 37   | 32    |
| 11008 | 33.5 | 52   | 31    | 96    | 30   | 31   | 19   | 56   | 60    |
| 11009 | 50   | 55   | 29    | 81    | 39   | 54   | 21   | 50   | 71    |
| 11010 | 38   | 31   | 21    | 78    | 25   | 34   | 15   | 36   | 42    |
| 11011 | 31   | 31   | 23    | 88    | 24   | 24   | 17   | 47   | 42    |
| 11012 | 28   | 27.5 | 21    | 67    | 23   | 23   | 15.5 | 34.5 | 46.5  |
| 11013 | 39   | 49   | 27    | 120.5 | 32   | 27   | 20   | 56   | 50.5  |
| 11014 | 46   | 53   | 29    | 99    | 29   | 49   | 21   | 58   | 52    |
| 11015 | 41.5 | 39   | 28    | 88    | 24   | 33   | 18   | 56.5 | 39    |
| 11016 | 26   | 24   | 17    | 78    | 20   | 23   | 14   | 24.5 | 24    |
| 11017 | 35.5 | 23   | 17    | 64    | 26   | 32   | 12   | 25   | 24    |
| 11018 | 25   | 37   | 23    | 70    | 54   | 24   | 17   | 36   | 42    |
| 11019 | 28.5 | 36   | 19    | 75.5  | 36   | 24   | 13   | 31   | 34    |
| 11020 | 19   | 22   | 14    | 64    | 20.5 | 19   | 10   | 23   | 20    |
| 11021 | 47   | 47.5 | 27    | 93    | 31.5 | 35   | 23   | 45.5 | 64    |
| 11022 | 37   | 46   | 25    | 90    | 27   | 31   | 20   | 43   | 52.5  |
| 11023 | 60.5 | 43.5 | 18    | 75    | 23   | 58   | 15   | 33   | 46.5  |
| 11024 | 22   | 21   | 17    | 62    | 22   | 20   | 12   | 27   | 29    |
| 11025 | 44   | 70   | 27    | 113   | 32   | 38   | 22   | 66.5 | 51    |
| 11026 | 26   | 23.5 | 16    | 60    | 22   | 22   | 13.5 | 26   | 24    |
| 11027 | 20   | 14.5 | 19    | 62    | 18   | 17   | 12   | 28   | 19    |
| 11028 | 30.5 | 24   | 22    | 82    | 21   | 19   | 14   | 32   | 34    |
| 11029 | 35.5 | 18   | 16    | 77.5  | 18   | 22   | 9.5  | 23   | 35    |
| 11030 | 28   | 25   | 23.5  | 79    | 26   | 21   | 15   | 32   | 32    |
| 11031 | 46.5 | 30   | 27    | 98    | 38.5 | 24   | 36   | 37   | 102.5 |
| 11032 | 30   | 19   | 12    | 68    | 33.5 | 26   | 11   | 27   | 13    |
| 11033 | 159  | 35   | 104.5 | 95    | 100  | 41.5 | 60   | 76.5 | 144.5 |
| 11034 | 13   | 16   | 11    | 56    | 24   | 17   | 8    | 14   | 14    |
| 11035 | 41   | 23   | 23    | 134   | 40   | 28   | 23.5 | 57   | 81    |
| 11036 | 27   | 19   | 14    | 40    | 42.5 | 19.5 | 13   | 16   | 31    |
| 11037 | 24   | 17   | 16    | 54.5  | 25   | 21   | 12   | 15   | 32    |
| 11038 | 19   | 14   | 15    | 73    | 26   | 19   | 18   | 18   | 45    |
| 11039 | 15   | 16   | 10    | 42    | 26.5 | 18   | 13   | 11   | 9     |
| 11040 | 20   | 16   | 12    | 49    | 42   | 21.5 | 8    | 10   | 11    |
| 11041 | 31   | 19   | 14.5  | 37    | 29.5 | 23   | 10   | 18   | 27    |
| 11042 | 21.5 | 16   | 12    | 61    | 34   | 18   | 37   | 17   | 10    |
| 11043 | 24.5 | 20   | 29    | 44    | 34.5 | 19   | 14   | 22   | 52    |

|       |      |      |      |       |      |      |      |      |      |
|-------|------|------|------|-------|------|------|------|------|------|
| 11044 | 24   | 19   | 30   | 57    | 48.5 | 24   | 12   | 14   | 17   |
| 11045 | 28   | 19   | 18   | 82    | 20.5 | 25.5 | 17   | 14   | 10   |
| 11046 | 28   | 32   | 21   | 95    | 33   | 25.5 | 15   | 31   | 25   |
| 11047 | 57.5 | 52   | 29   | 107.5 | 41   | 47   | 22   | 49.5 | 74   |
| 11048 | 41   | 56   | 32   | 123.5 | 38.5 | 45   | 53   | 62   | 60   |
| 11049 | 32   | 51.5 | 31   | 122   | 35.5 | 35   | 24   | 53   | 66   |
| 11050 | 33   | 49   | 32   | 130.5 | 54   | 31   | 25   | 50   | 58   |
| 11051 | 41   | 69   | 45   | 111   | 48.5 | 44   | 31   | 73   | 78   |
| 11052 | 40   | 40.5 | 31   | 114   | 36.5 | 31   | 24   | 44.5 | 49.5 |
| 11053 | 39.5 | 66   | 39   | 118.5 | 44   | 41   | 34   | 64.5 | 94   |
| 11054 | 36   | 69   | 36   | 123   | 39   | 42   | 28   | 67   | 75.5 |
| 11055 | 50   | 71   | 38   | 141   | 59   | 45   | 28   | 81   | 117  |
| 11056 | 42   | 67   | 38   | 124   | 45.5 | 42   | 34.5 | 75   | 71   |
| 11057 | 29.5 | 47   | 27   | 103.5 | 30.5 | 32   | 23   | 46.5 | 44   |
| 11058 | 48   | 46   | 32   | 120   | 35   | 34   | 22   | 55   | 49   |
| 11059 | 35.5 | 29   | 19.5 | 87    | 31   | 35   | 17   | 28   | 38   |
| 11060 | 44   | 37   | 31   | 126   | 38.5 | 33   | 22.5 | 42   | 45.5 |
| 11061 | 48   | 77   | 48   | 144   | 46   | 50.5 | 40   | 73   | 79   |
| 11062 | 35   | 51   | 29   | 106   | 32   | 34.5 | 23   | 51   | 47   |
| 11063 | 42   | 27   | 26   | 84    | 37.5 | 44   | 21   | 52   | 42   |
| 11064 | 32   | 43   | 26   | 117.5 | 33.5 | 31.5 | 21   | 45   | 63   |
| 11065 | 37   | 51   | 31   | 141   | 34.5 | 32   | 24   | 57   | 46   |
| 11066 | 24   | 24   | 24   | 107   | 28   | 22   | 14   | 30   | 27   |
| 11067 | 19   | 13   | 15   | 86    | 41   | 19   | 10   | 14   | 13   |
| 11068 | 20   | 14.5 | 13   | 54    | 64   | 17   | 13   | 22   | 12   |
| 11069 | 35   | 14   | 13   | 68    | 30   | 16.5 | 11   | 24   | 10   |
| 11070 | 20   | 13   | 11   | 62.5  | 27   | 16   | 10   | 24   | 12   |
| 11071 | 14   | 12   | 14   | 47    | 21   | 13.5 | 8    | 13   | 9    |
| 11072 | 16   | 13   | 13   | 56    | 25   | 14   | 9    | 15   | 10   |
| 11073 | 14   | 13.5 | 10   | 54    | 23.5 | 16   | 7    | 15   | 10   |
| 11074 | 195  | 17.5 | 22   | 98    | 38   | 28   | 15   | 70   | 21   |
| 11075 | 50   | 47   | 36   | 70    | 43.5 | 32   | 27   | 67   | 41   |
| 11076 | 29   | 19   | 19   | 101   | 144  | 20   | 41   | 30   | 58   |
| 11077 | 35   | 19   | 25   | 117.5 | 38.5 | 20   | 27.5 | 31   | 62   |
| 11078 | 20.5 | 16.5 | 13   | 72    | 52   | 22   | 14   | 53   | 17   |
| 11079 | 30   | 17   | 11   | 19.5  | 25   | 21   | 9    | 21   | 13   |
| 11080 | 47   | 18   | 25.5 | 130   | 44.5 | 21   | 16   | 143  | 21   |
| 11081 | 28.5 | 19.5 | 15   | 67    | 27   | 24   | 9    | 21   | 18   |
| 11082 | 17   | 14.5 | 34   | 96    | 26   | 17   | 11   | 24   | 19   |
| 11083 | 22   | 17   | 17   | 55    | 98   | 17.5 | 14   | 20   | 18   |
| 11084 | 26   | 41   | 22   | 73    | 30   | 28   | 10   | 19   | 51   |
| 11085 | 20   | 16   | 18   | 50    | 30   | 18   | 11   | 16   | 26   |
| 11086 | 14.5 | 11   | 13.5 | 71.5  | 24   | 13.5 | 7    | 14   | 23   |
| 11087 | 23   | 17   | 13   | 50.5  | 26   | 19   | 13   | 17   | 15   |
| 11088 | 82   | 69   | 39   | 103   | 38   | 69   | 24   | 60   | 126  |
| 11089 | 70   | 78   | 130  | 120   | 45   | 49   | 36   | 60   | 78   |
| 11090 | 61   | 88.5 | 47   | 113   | 51   | 56   | 31.5 | 70   | 81   |

|       |      |      |      |       |      |      |      |      |       |
|-------|------|------|------|-------|------|------|------|------|-------|
| 11091 | 44   | 58   | 42   | 139   | 44.5 | 46   | 27   | 58   | 73.5  |
| 11092 | 55   | 86.5 | 41   | 120   | 38.5 | 49   | 40   | 81   | 69    |
| 11093 | 68   | 65   | 57.5 | 115   | 51.5 | 52   | 35   | 66   | 169   |
| 11094 | 45   | 63   | 41   | 116   | 50.5 | 47   | 33   | 62   | 63    |
| 11095 | 55   | 87   | 50   | 118   | 78   | 59.5 | 33   | 73   | 89.5  |
| 11096 | 58.5 | 74   | 45   | 93    | 54   | 52   | 34   | 66   | 77    |
| 11097 | 47   | 69   | 38   | 91    | 47   | 53   | 25   | 57   | 60    |
| 11098 | 48.5 | 52   | 31   | 72.5  | 37   | 41.5 | 25   | 72.5 | 75    |
| 11099 | 50   | 67.5 | 37   | 91    | 42   | 49.5 | 28   | 63.5 | 68    |
| 11100 | 60   | 63   | 34   | 101   | 42   | 45.5 | 31   | 54   | 65    |
| 11101 | 53.5 | 73   | 42   | 97.5  | 47   | 63   | 30   | 64   | 73    |
| 11102 | 44   | 64   | 40   | 96    | 36.5 | 47   | 27   | 54   | 56    |
| 11103 | 47.5 | 69   | 37   | 99    | 46   | 53   | 30   | 56   | 66    |
| 11104 | 35   | 42   | 22   | 71    | 38   | 34   | 18.5 | 34   | 39    |
| 11105 | 64.5 | 68   | 37   | 94    | 50   | 48   | 27   | 60   | 76    |
| 11106 | 67.5 | 75.5 | 49   | 114   | 51.5 | 51.5 | 31   | 69.5 | 83    |
| 11107 | 53.5 | 79   | 49   | 117   | 51   | 48   | 37   | 70   | 76.5  |
| 11108 | 51.5 | 76   | 45   | 95    | 71   | 54   | 60   | 83   | 86    |
| 11109 | 44   | 57   | 38   | 134   | 48   | 44   | 27   | 57.5 | 101.5 |
| 11110 | 48   | 66.5 | 37   | 100   | 47.5 | 51.5 | 30   | 63   | 87    |
| 11111 | 49   | 76   | 41   | 123   | 49.5 | 47   | 30   | 62   | 99    |
| 11112 | 53   | 57   | 41   | 94    | 40   | 47   | 25   | 54.5 | 61    |
| 11113 | 48   | 68.5 | 52   | 90    | 42   | 52   | 31   | 58   | 76    |
| 11114 | 43   | 79   | 42   | 96.5  | 47   | 48   | 32   | 59   | 82    |
| 11115 | 48   | 69.5 | 40   | 105.5 | 45.5 | 39   | 31   | 77   | 80    |
| 11116 | 38   | 55   | 34   | 88    | 41.5 | 39   | 30   | 50   | 70    |
| 11117 | 15   | 14   | 11.5 | 22    | 21.5 | 20   | 8    | 14   | 9     |
| 11118 | 12   | 13   | 9    | 10    | 15.5 | 18   | 6    | 8    | 8     |
| 11119 | 13   | 14   | 13   | 26    | 19   | 19   | 7    | 11   | 9     |
| 11120 | 15   | 14   | 14   | 51    | 16.5 | 19   | 7    | 10   | 9     |
| 11121 | 16   | 13   | 9    | 30    | 18   | 18   | 7    | 16   | 9     |
| 11122 | 27   | 31.5 | 24   | 87    | 29   | 31   | 14   | 30   | 33    |
| 11123 | 17   | 14.5 | 22   | 50    | 28   | 21   | 8    | 13   | 13    |
| 11124 | 19   | 15   | 16   | 71.5  | 18   | 20   | 8    | 14   | 13    |
| 11125 | 52.5 | 14   | 14   | 70.5  | 21   | 19   | 8    | 15   | 11    |
| 11126 | 16   | 12   | 12   | 56    | 20   | 18   | 7    | 15   | 9     |
| 11127 | 14   | 11   | 11   | 28    | 21   | 17   | 8    | 10   | 8     |
| 11128 | 14.5 | 14   | 18   | 44    | 19   | 18   | 6    | 11   | 10    |
| 11129 | 14   | 13   | 11   | 47    | 15   | 17   | 7    | 13   | 12    |
| 11130 | 21   | 21   | 16   | 51    | 20.5 | 23   | 9    | 15   | 15    |
| 11131 | 16   | 13   | 12   | 48    | 20   | 20   | 8    | 17   | 12    |
| 11132 | 617  | 143  | 198  | 186   | 311  | 185  | 196  | 316  | 133   |
| 11133 | 22   | 16   | 29   | 72    | 29   | 23   | 11   | 18   | 16    |
| 11134 | 25   | 17   | 15   | 43    | 30   | 24   | 15   | 17   | 14    |
| 11135 | 15   | 11   | 13   | 56    | 21   | 18   | 7    | 12   | 16    |
| 11136 | 15   | 15   | 13   | 36    | 20.5 | 21   | 7    | 11   | 10    |
| 11137 | 28   | 14   | 17   | 60    | 43   | 19.5 | 18   | 17   | 16    |

|       |       |      |       |       |       |      |       |      |       |
|-------|-------|------|-------|-------|-------|------|-------|------|-------|
| 11138 | 29    | 150  | 39    | 64    | 34    | 24   | 46    | 29   | 220.5 |
| 11139 | 30.5  | 32   | 47    | 72    | 313.5 | 25   | 12    | 31.5 | 20    |
| 11140 | 38    | 21   | 37    | 63    | 392   | 31   | 18    | 25.5 | 27.5  |
| 11141 | 498.5 | 145  | 122.5 | 180.5 | 165   | 132  | 133   | 412  | 150   |
| 11142 | 17    | 14   | 19    | 63    | 39    | 20   | 15    | 14   | 14.5  |
| 11143 | 28    | 21   | 43.5  | 47    | 37    | 27   | 11    | 15   | 19    |
| 11144 | 16    | 15   | 14    | 36.5  | 28.5  | 20   | 8     | 12.5 | 15    |
| 11145 | 25    | 17   | 18    | 132   | 34    | 21   | 16    | 24   | 63.5  |
| 11146 | 22    | 15   | 19    | 71    | 46    | 19   | 10    | 18   | 41.5  |
| 11147 | 27    | 16   | 20    | 54    | 30.5  | 18   | 9     | 19   | 31    |
| 11148 | 32.5  | 12   | 12    | 46    | 30    | 19   | 8     | 12   | 10    |
| 11149 | 42    | 17   | 22    | 112   | 46    | 25   | 20    | 34   | 16    |
| 11150 | 27    | 16   | 21    | 104   | 30    | 22   | 11    | 23   | 16    |
| 11151 | 37    | 21   | 27    | 138   | 33    | 30   | 14    | 31   | 42    |
| 11152 | 42    | 15   | 15    | 36    | 35    | 21   | 9     | 14   | 23    |
| 11153 | 46.5  | 19.5 | 19    | 62    | 40    | 40   | 12    | 51   | 22    |
| 11154 | 31    | 20   | 18    | 24    | 78    | 26   | 15    | 96.5 | 16    |
| 11155 | 76    | 25   | 26    | 88    | 66    | 41   | 17    | 25   | 33    |
| 11156 | 67.5  | 21   | 29    | 132   | 34    | 27   | 130.5 | 71   | 46.5  |
| 11157 | 34    | 15   | 21    | 89.5  | 30    | 21   | 10    | 23   | 28    |
| 11158 | 31    | 15   | 17    | 67    | 46    | 23   | 14    | 48   | 24    |
| 11159 | 63    | 24   | 31    | 142   | 46    | 26   | 15    | 42   | 44    |
| 11160 | 21    | 19   | 21.5  | 60    | 35.5  | 19   | 17.5  | 28   | 26    |
| 11161 | 18    | 12   | 9     | 33    | 24    | 19   | 8     | 16   | 8     |
| 11162 | 20    | 11   | 13    | 60    | 25    | 14   | 8     | 14   | 21.5  |
| 11163 | 57    | 22   | 18    | 73.5  | 44.5  | 21   | 31    | 33   | 24    |
| 11164 | 14    | 13   | 8     | 20    | 22    | 14   | 6     | 12   | 11    |
| 11165 | 16.5  | 11   | 10    | 21    | 21    | 15   | 7     | 12   | 7     |
| 11166 | 22    | 15   | 17.5  | 103   | 28    | 18   | 10    | 20   | 23    |
| 11167 | 39    | 15   | 17    | 29    | 34    | 21   | 12    | 27   | 16    |
| 11168 | 29    | 16   | 20    | 43    | 33    | 25.5 | 24    | 72   | 36.5  |
| 11169 | 35    | 18   | 24    | 81    | 41    | 26.5 | 16.5  | 33   | 60    |
| 11170 | 23    | 11   | 11    | 42    | 22.5  | 15   | 7     | 11   | 13    |
| 11171 | 18    | 14   | 13    | 58    | 34    | 17   | 8     | 17   | 33    |
| 11172 | 59    | 16   | 33    | 167   | 40    | 21.5 | 13    | 66   | 17    |
| 11173 | 62    | 16   | 18    | 89    | 38    | 26   | 12    | 80   | 39    |
| 11174 | 23    | 12   | 19    | 46    | 36    | 17   | 9.5   | 17   | 25    |
| 11175 | 47    | 18   | 19    | 84    | 25    | 35   | 16    | 23   | 73.5  |
| 11176 | 35    | 13   | 12    | 30.5  | 30    | 19   | 10    | 21   | 12    |
| 11177 | 25    | 22   | 15    | 39    | 23    | 28   | 9     | 13   | 18.5  |
| 11178 | 27    | 15   | 12    | 40    | 36    | 20   | 11.5  | 13   | 12    |
| 11179 | 64    | 72   | 37    | 77    | 44.5  | 46   | 28    | 57   | 60    |
| 11180 | 39.5  | 45   | 33    | 67    | 39    | 36   | 22.5  | 45   | 40    |
| 11181 | 71    | 56   | 36    | 79.5  | 50.5  | 37.5 | 25    | 53   | 62    |
| 11182 | 192   | 65   | 42    | 89    | 40    | 57   | 29.5  | 59   | 78    |
| 11183 | 36    | 64   | 28    | 75    | 35    | 36.5 | 24    | 45   | 60    |
| 11184 | 31    | 38.5 | 24    | 70    | 30    | 27   | 19    | 43   | 38    |



|       |       |      |      |       |      |      |      |      |      |
|-------|-------|------|------|-------|------|------|------|------|------|
| 11185 | 65.5  | 58   | 34   | 97    | 29   | 63   | 23   | 52.5 | 54   |
| 11186 | 55    | 66   | 35   | 90    | 34   | 61   | 28   | 52   | 67   |
| 11187 | 48    | 46   | 30.5 | 62    | 36.5 | 46   | 30   | 41   | 92   |
| 11188 | 44.5  | 66   | 45   | 103   | 37.5 | 43   | 28   | 59   | 64   |
| 11189 | 29    | 43   | 26   | 64    | 32   | 30   | 23   | 40   | 55   |
| 11190 | 44    | 54.5 | 28   | 89.5  | 46.5 | 35.5 | 23   | 52   | 51   |
| 11191 | 32    | 39.5 | 25   | 76    | 37.5 | 33   | 18   | 38   | 49   |
| 11192 | 22    | 24   | 19   | 52    | 31   | 24   | 13   | 22   | 30   |
| 11193 | 72    | 75   | 47   | 137   | 43   | 49   | 30   | 69   | 85   |
| 11194 | 33    | 47   | 29   | 78    | 39   | 35   | 19   | 40   | 52   |
| 11195 | 46    | 42   | 25.5 | 107   | 36   | 34   | 24   | 47   | 46   |
| 11196 | 29.5  | 46   | 29   | 72    | 33   | 35.5 | 21   | 42   | 50   |
| 11197 | 39    | 41   | 33   | 87    | 35   | 35   | 24.5 | 47   | 48   |
| 11198 | 43    | 57   | 39   | 97    | 50   | 41   | 27   | 56   | 88.5 |
| 11199 | 69    | 62   | 40   | 90.5  | 39   | 65   | 29   | 54   | 76   |
| 11200 | 31    | 39   | 23.5 | 81    | 35   | 30   | 20   | 37   | 36   |
| 11201 | 43    | 61   | 31   | 107   | 41   | 40.5 | 25   | 56   | 124  |
| 11202 | 53    | 85   | 42   | 90    | 36   | 48   | 35   | 70   | 83   |
| 11203 | 58.5  | 56   | 41   | 113.5 | 42   | 42   | 30   | 62   | 60   |
| 11204 | 35.5  | 39   | 26   | 92    | 30   | 38   | 19   | 44   | 53.5 |
| 11205 | 29    | 27   | 23   | 69.5  | 29   | 29   | 14   | 36   | 25   |
| 11206 | 27    | 22   | 20   | 69.5  | 26   | 22   | 13   | 24   | 72   |
| 11207 | 32    | 47   | 29   | 78    | 53   | 33.5 | 22   | 45   | 62   |
| 11208 | 43.5  | 58   | 32   | 105   | 32   | 37   | 24   | 55   | 53   |
| 11209 | 121.5 | 47   | 27   | 72    | 29   | 54   | 19   | 41   | 44   |
| 11210 | 33    | 34   | 20   | 58    | 25   | 27   | 15   | 31   | 41   |
| 11211 | 30    | 34   | 24   | 77.5  | 50.5 | 25   | 34   | 30   | 36   |
| 11212 | 74    | 50   | 30   | 81    | 39   | 38.5 | 27   | 44   | 63   |
| 11213 | 48    | 50   | 29   | 91    | 37   | 42   | 21   | 47   | 64   |
| 11214 | 30    | 36   | 24   | 66.5  | 26   | 30   | 20   | 32   | 37   |
| 11215 | 40    | 44   | 29   | 68    | 32.5 | 32   | 22   | 45   | 59   |
| 11216 | 30    | 47   | 25   | 61.5  | 28   | 31.5 | 19   | 43.5 | 47   |
| 11217 | 30    | 39   | 27   | 67.5  | 39   | 35   | 18.5 | 34   | 42   |
| 11218 | 42    | 51.5 | 31   | 80    | 33   | 34   | 22   | 52   | 65   |
| 11219 | 37    | 49   | 25   | 62    | 33   | 36   | 22   | 41.5 | 42.5 |
| 11220 | 58    | 64.5 | 36   | 90    | 42   | 43   | 31   | 62   | 90   |
| 11221 | 39    | 45   | 26   | 73    | 32   | 37   | 20   | 41   | 41   |
| 11222 | 53    | 74   | 46   | 97    | 48.5 | 51   | 37   | 71   | 68   |
| 11223 | 32    | 55   | 30   | 89.5  | 43   | 34   | 23   | 49   | 58   |
| 11224 | 26    | 31   | 22   | 81    | 49   | 25   | 16   | 33   | 41   |
| 11225 | 43.5  | 44   | 29.5 | 74.5  | 64   | 39   | 22   | 40   | 65   |
| 11226 | 41    | 63.5 | 38   | 99    | 37.5 | 39   | 24   | 54   | 61   |
| 11227 | 21    | 12   | 11   | 30    | 22   | 17   | 8    | 16   | 10   |
| 11228 | 25    | 11   | 10.5 | 40    | 22.5 | 15   | 9    | 14   | 9    |
| 11229 | 26.5  | 12   | 13   | 61    | 24.5 | 17   | 9    | 16   | 9    |
| 11230 | 22    | 11   | 10   | 24    | 20   | 14   | 7    | 9    | 6    |
| 11231 | 35    | 20   | 23   | 114   | 30   | 31   | 10   | 25   | 32   |

|       |      |      |      |       |      |      |      |      |      |
|-------|------|------|------|-------|------|------|------|------|------|
| 11232 | 23   | 12   | 19   | 70.5  | 26   | 18   | 5.5  | 18   | 25   |
| 11233 | 54   | 26   | 27   | 107.5 | 36   | 32   | 12   | 47   | 38   |
| 11234 | 171  | 45   | 25   | 102.5 | 38   | 143  | 19   | 33.5 | 89   |
| 11235 | 59   | 20.5 | 14.5 | 58    | 34   | 26   | 12   | 30   | 30.5 |
| 11236 | 28   | 22   | 63   | 51    | 34   | 27   | 34   | 30   | 60.5 |
| 11237 | 54   | 69   | 48   | 105   | 67   | 52.5 | 55   | 76   | 75   |
| 11238 | 41   | 67   | 40   | 100   | 51   | 44.5 | 31   | 60   | 75   |
| 11239 | 40.5 | 72   | 43   | 101   | 46   | 53   | 35   | 65   | 73   |
| 11240 | 44.5 | 76   | 57   | 119   | 46   | 51   | 37   | 77.5 | 86   |
| 11241 | 54.5 | 99   | 56   | 108   | 49.5 | 65   | 43   | 84   | 84   |
| 11242 | 55.5 | 63.5 | 39   | 95    | 46   | 44   | 30   | 54   | 69   |
| 11243 | 37   | 58   | 33   | 86    | 39   | 43   | 27   | 52.5 | 60   |
| 11244 | 47   | 74.5 | 40.5 | 113   | 46   | 51   | 37.5 | 77   | 87   |
| 11245 | 39   | 75   | 37   | 121   | 43   | 53   | 32   | 66   | 92.5 |
| 11246 | 38   | 56   | 34   | 99.5  | 37.5 | 39   | 27   | 52   | 59   |
| 11247 | 32   | 39   | 30   | 98.5  | 29.5 | 31   | 22   | 43   | 71   |
| 11248 | 49   | 74   | 43   | 120   | 49   | 51.5 | 33   | 69   | 76   |
| 11249 | 51   | 70   | 40   | 110   | 44.5 | 49   | 32   | 62   | 184  |
| 11250 | 31.5 | 50   | 31   | 76.5  | 32   | 39   | 23   | 44   | 45   |
| 11251 | 38.5 | 45   | 30   | 84    | 36   | 34   | 29   | 46   | 47   |
| 11252 | 56.5 | 96   | 57   | 109   | 52.5 | 66   | 47   | 79   | 90   |
| 11253 | 28.5 | 43.5 | 27   | 84    | 31   | 30   | 21   | 42   | 40   |
| 11254 | 52.5 | 81   | 57.5 | 126.5 | 47   | 53   | 37   | 70   | 83   |
| 11255 | 30   | 24   | 19   | 93    | 32   | 34   | 27.5 | 24   | 92.5 |
| 11256 | 23   | 20   | 22   | 75    | 29   | 22   | 10   | 23   | 16   |
| 11257 | 21   | 21   | 18   | 68    | 25.5 | 20   | 12   | 20   | 23   |
| 11258 | 17   | 17   | 14   | 38    | 28   | 21   | 9    | 14   | 20   |
| 11259 | 24   | 16   | 18   | 91    | 29   | 18   | 37   | 18   | 18   |
| 11260 | 41   | 29   | 18.5 | 57    | 32   | 42   | 14   | 25   | 31.5 |
| 11261 | 19   | 17   | 15   | 30    | 30   | 23   | 15   | 19   | 20   |
| 11262 | 26.5 | 19.5 | 16   | 29    | 31   | 25.5 | 17   | 31.5 | 23   |
| 11263 | 26   | 17   | 25   | 106.5 | 55   | 21   | 16   | 33   | 118  |
| 11264 | 30   | 19   | 22   | 79    | 33   | 21   | 22   | 23   | 36   |
| 11265 | 30   | 26   | 56   | 33    | 34.5 | 28   | 16   | 29   | 28   |
| 11266 | 50   | 27   | 27   | 99.5  | 39   | 35   | 18   | 39   | 69   |
| 11267 | 47   | 21   | 26   | 107   | 44   | 23.5 | 19   | 51   | 93   |
| 11268 | 21   | 23   | 16   | 33    | 30   | 20   | 12   | 19   | 21   |
| 11269 | 27   | 17   | 16   | 51    | 30   | 27   | 14   | 27   | 30   |
| 11270 | 25   | 20   | 21   | 60    | 34   | 29   | 12   | 25   | 38   |
| 11271 | 63   | 18.5 | 27   | 120   | 43   | 25   | 18   | 26   | 41   |
| 11272 | 19   | 17   | 15   | 47    | 25   | 19   | 10   | 19   | 13   |
| 11273 | 12   | 14   | 13   | 38    | 23   | 16   | 7    | 15   | 9    |
| 11274 | 52   | 26   | 38   | 146.5 | 46.5 | 32   | 33   | 37   | 22   |
| 11275 | 54.5 | 80   | 40   | 109   | 41   | 55   | 41   | 59   | 69   |
| 11276 | 46   | 53   | 38   | 91    | 30.5 | 47   | 23   | 46   | 47   |
| 11277 | 76.5 | 60.5 | 34.5 | 110   | 39.5 | 52   | 25   | 48   | 56   |
| 11278 | 83.5 | 100  | 59.5 | 153   | 61   | 65   | 42   | 90   | 89   |

|       |      |      |      |       |      |      |      |      |      |
|-------|------|------|------|-------|------|------|------|------|------|
| 11279 | 58.5 | 70   | 42   | 103   | 79.5 | 52   | 35   | 67   | 80   |
| 11280 | 40   | 54   | 32   | 80    | 47   | 42   | 23   | 40   | 51   |
| 11281 | 38   | 47   | 29   | 78    | 41   | 39   | 27   | 41   | 46   |
| 11282 | 56   | 77   | 44   | 95    | 47   | 58   | 32   | 62   | 69   |
| 11283 | 88.5 | 62.5 | 38   | 98    | 36.5 | 45   | 27   | 45.5 | 65.5 |
| 11284 | 51   | 73   | 46   | 101   | 49   | 56   | 29   | 57   | 69   |
| 11285 | 56   | 55   | 51   | 92.5  | 53.5 | 54   | 34   | 59   | 68   |
| 11286 | 75.5 | 81   | 52   | 142   | 79.5 | 61   | 46   | 77   | 99   |
| 11287 | 61   | 75   | 47   | 104.5 | 51.5 | 57   | 38   | 81   | 88   |
| 11288 | 52   | 84.5 | 32   | 92    | 30   | 40.5 | 25   | 46   | 70   |
| 11289 | 44   | 55.5 | 31.5 | 76    | 32   | 44   | 19.5 | 48   | 59   |
| 11290 | 44   | 56   | 37   | 108.5 | 44.5 | 41   | 29   | 52   | 58   |
| 11291 | 57   | 77   | 99   | 108   | 47.5 | 47   | 34   | 74   | 81   |
| 11292 | 77.5 | 71   | 46   | 107   | 41.5 | 49   | 31   | 68   | 81   |
| 11293 | 54   | 98.5 | 52   | 117   | 50   | 65   | 49   | 85.5 | 87   |
| 11294 | 45.5 | 67   | 39   | 94    | 90.5 | 49   | 34   | 56   | 64   |
| 11295 | 54   | 59   | 32   | 101.5 | 32   | 56   | 25.5 | 49   | 55   |
| 11296 | 59   | 73   | 44   | 116   | 47.5 | 52   | 33   | 63   | 75   |
| 11297 | 45   | 72   | 40   | 99    | 51   | 54   | 37   | 63   | 66.5 |
| 11298 | 43   | 54   | 35   | 98    | 33.5 | 37   | 28   | 48.5 | 55   |
| 11299 | 63.5 | 86   | 43   | 107.5 | 45.5 | 58   | 29   | 73   | 94   |
| 11300 | 48   | 69   | 40   | 95    | 42   | 47   | 35   | 59   | 66   |
| 11301 | 32   | 20   | 25   | 69.5  | 51   | 27   | 16   | 30   | 14   |
| 11302 | 34.5 | 17.5 | 19   | 83.5  | 23   | 30   | 20   | 22   | 13.5 |
| 11303 | 49.5 | 38   | 37   | 145.5 | 32   | 37   | 19   | 43   | 73   |
| 11304 | 32.5 | 23   | 22   | 87.5  | 37   | 34   | 19   | 44   | 26   |
| 11305 | 26.5 | 21.5 | 17   | 53    | 31.5 | 26   | 11   | 17   | 18   |
| 11306 | 16   | 13   | 11   | 34.5  | 21   | 20   | 8    | 13   | 10   |
| 11307 | 21   | 14   | 12   | 39.5  | 20   | 20   | 8.5  | 15   | 15   |
| 11308 | 35   | 20.5 | 24   | 112   | 29.5 | 26   | 21.5 | 38   | 23   |
| 11309 | 24   | 14   | 19.5 | 65    | 34.5 | 19   | 10   | 15.5 | 18   |
| 11310 | 20   | 12   | 17   | 25    | 30   | 17   | 9    | 14   | 8    |
| 11311 | 29   | 18   | 16   | 63    | 28   | 29   | 9    | 15   | 14   |
| 11312 | 29   | 19.5 | 21   | 50    | 30.5 | 26   | 13   | 19.5 | 27   |
| 11313 | 114  | 17   | 20   | 81    | 25   | 21   | 12   | 21   | 12   |
| 11314 | 69.5 | 52   | 42.5 | 273   | 40   | 44   | 37   | 76   | 53   |
| 11315 | 19   | 14   | 16.5 | 63    | 18   | 16   | 7    | 18   | 10   |
| 11316 | 20.5 | 15   | 15   | 61    | 25.5 | 20   | 10   | 18   | 15   |
| 11317 | 18   | 14   | 14   | 49.5  | 28   | 19   | 9    | 12   | 10   |
| 11318 | 13   | 13   | 9    | 12    | 14   | 18   | 7    | 11   | 8    |
| 11319 | 15   | 15   | 8    | 13    | 15   | 19   | 7.5  | 10.5 | 8    |
| 11320 | 15   | 14   | 10   | 13    | 16   | 20   | 8    | 11   | 10   |
| 11321 | 22   | 18   | 16   | 84    | 19   | 22   | 9    | 14   | 14.5 |
| 11322 | 23   | 17   | 17.5 | 81    | 20   | 18   | 9    | 19   | 11   |
| 11323 | 18   | 13.5 | 12   | 43    | 22   | 16   | 10   | 17   | 8    |
| 11324 | 16   | 13   | 13   | 63.5  | 22   | 17.5 | 8    | 12   | 8    |
| 11325 | 26   | 15   | 15.5 | 87.5  | 24   | 23   | 10   | 24   | 14   |

|       |      |      |      |       |      |      |      |      |      |
|-------|------|------|------|-------|------|------|------|------|------|
| 11326 | 15   | 12   | 10   | 16    | 18.5 | 18   | 8    | 10   | 7    |
| 11327 | 24.5 | 14   | 11   | 50    | 20   | 18   | 7    | 11   | 8    |
| 11328 | 18   | 14   | 12   | 35    | 20   | 19   | 9    | 14   | 9    |
| 11329 | 31   | 17   | 19   | 44    | 33   | 25   | 10   | 16   | 14   |
| 11330 | 41   | 19   | 129  | 67    | 42   | 26   | 53   | 46   | 147  |
| 11331 | 58.5 | 21   | 22   | 87    | 38.5 | 32   | 19.5 | 138  | 17   |
| 11332 | 28.5 | 18   | 19   | 71    | 31   | 21   | 16   | 78   | 79   |
| 11333 | 32.5 | 19   | 15   | 48    | 27.5 | 24   | 12   | 29   | 16   |
| 11334 | 84   | 20   | 25   | 122   | 35.5 | 38   | 14   | 39.5 | 91   |
| 11335 | 40   | 21   | 19   | 35    | 29.5 | 29.5 | 15   | 35   | 20.5 |
| 11336 | 26   | 15   | 20   | 99    | 23   | 19.5 | 10   | 21   | 63   |
| 11337 | 16   | 10.5 | 9    | 37    | 15   | 16   | 7    | 14   | 7    |
| 11338 | 24   | 14   | 13   | 51.5  | 26.5 | 17   | 11   | 15   | 9    |
| 11339 | 30   | 22   | 18   | 61    | 26.5 | 24   | 17   | 38   | 19   |
| 11340 | 14   | 14   | 8    | 23.5  | 18   | 19   | 6    | 10   | 9    |
| 11341 | 25   | 16   | 14   | 35    | 22   | 23   | 8    | 14   | 23   |
| 11342 | 74   | 15   | 12.5 | 34.5  | 38   | 21   | 10   | 28   | 14   |
| 11343 | 30.5 | 14   | 14   | 30    | 28   | 22   | 11   | 15.5 | 11   |
| 11344 | 106  | 19   | 15   | 43    | 22   | 39   | 10.5 | 14   | 14   |
| 11345 | 34   | 23   | 19   | 48    | 81   | 30.5 | 13   | 29   | 15   |
| 11346 | 30.5 | 16   | 16   | 71    | 52   | 23   | 10   | 33   | 13   |
| 11347 | 17   | 12   | 11   | 39    | 35   | 17   | 8    | 12   | 17   |
| 11348 | 20.5 | 12   | 9    | 17    | 18   | 18   | 6    | 10   | 8    |
| 11349 | 26.5 | 14   | 14   | 22    | 24   | 22   | 9    | 14   | 11   |
| 11350 | 21   | 13   | 21   | 106.5 | 33   | 20   | 13   | 20.5 | 13   |
| 11351 | 39   | 19   | 31   | 158   | 46   | 27.5 | 36   | 33   | 23   |
| 11352 | 19   | 12   | 11   | 29    | 21   | 16   | 8    | 11   | 9    |
| 11353 | 16   | 12.5 | 11   | 32    | 18   | 17   | 9    | 13   | 8    |
| 11354 | 17.5 | 13   | 11   | 56.5  | 20   | 17   | 8    | 11   | 10   |
| 11355 | 18   | 10   | 10   | 31.5  | 18   | 17.5 | 7    | 24   | 16   |
| 11356 | 23   | 19   | 24   | 54    | 26   | 20   | 10   | 20   | 25   |
| 11357 | 31   | 15   | 14   | 31    | 26   | 20   | 11   | 24   | 13   |
| 11358 | 99   | 15   | 16   | 47.5  | 31   | 20   | 19   | 101  | 16   |
| 11359 | 27   | 13   | 13   | 37.5  | 26   | 19   | 10   | 19   | 13   |
| 11360 | 22   | 12   | 14   | 26    | 20   | 18   | 10   | 25   | 9    |
| 11361 | 26   | 14   | 18   | 79    | 23   | 23   | 10   | 30.5 | 15   |
| 11362 | 65.5 | 45   | 22   | 47.5  | 24   | 21   | 11   | 18   | 16   |
| 11363 | 23   | 14   | 13   | 25    | 33   | 19   | 11   | 14   | 12   |
| 11364 | 19   | 13   | 12   | 48    | 23   | 19.5 | 7    | 12   | 10   |
| 11365 | 17   | 13   | 12   | 29.5  | 25   | 17   | 9    | 18   | 10   |
| 11366 | 147  | 15   | 20   | 148.5 | 23   | 20.5 | 15   | 142  | 11   |
| 11367 | 28   | 15   | 15   | 28    | 31   | 19   | 11   | 86.5 | 14   |
| 11368 | 32   | 12   | 12   | 23    | 29   | 21   | 23   | 40   | 11   |
| 11369 | 28   | 12   | 17   | 35    | 31   | 21   | 10   | 33   | 11   |
| 11370 | 28   | 18   | 18   | 41    | 40   | 20   | 22   | 51.5 | 14   |
| 11371 | 122  | 14   | 15   | 62.5  | 33   | 20   | 13   | 26.5 | 44   |
| 11372 | 37   | 13   | 19   | 84.5  | 26.5 | 19   | 29   | 43   | 13   |

|       |      |      |      |       |      |      |      |      |       |
|-------|------|------|------|-------|------|------|------|------|-------|
| 11373 | 40   | 65   | 20   | 64    | 112  | 31   | 17   | 34   | 42    |
| 11374 | 34   | 14   | 15   | 30    | 27.5 | 18   | 14.5 | 20.5 | 12    |
| 11375 | 21   | 15   | 12   | 33.5  | 222  | 20   | 8    | 14   | 15    |
| 11376 | 32.5 | 18   | 27   | 68.5  | 33   | 22   | 14.5 | 40   | 37.5  |
| 11377 | 31   | 13   | 15   | 36    | 24.5 | 16   | 11   | 15   | 17    |
| 11378 | 18.5 | 16   | 14   | 28    | 24   | 17   | 9    | 14   | 10    |
| 11379 | 31   | 20   | 16   | 76    | 94.5 | 20   | 11   | 21   | 16    |
| 11380 | 53   | 57   | 36   | 96.5  | 32   | 37   | 28   | 57   | 63    |
| 11381 | 41   | 61   | 38   | 95    | 40   | 40   | 31   | 62   | 55.5  |
| 11382 | 29   | 33.5 | 22   | 60.5  | 30   | 29   | 18   | 34   | 27    |
| 11383 | 37   | 61   | 31   | 96    | 37.5 | 43   | 26   | 59.5 | 62    |
| 11384 | 50   | 54.5 | 27   | 85.5  | 34   | 59   | 19   | 47   | 54    |
| 11385 | 38   | 56.5 | 28   | 76    | 32.5 | 32   | 23   | 57   | 54    |
| 11386 | 34   | 42   | 24.5 | 59    | 28   | 31   | 18   | 48   | 63    |
| 11387 | 54   | 62   | 38   | 107   | 41   | 43   | 29   | 61   | 78    |
| 11388 | 43   | 57.5 | 34   | 89    | 35   | 42   | 24   | 56   | 64.5  |
| 11389 | 41   | 54   | 33   | 124   | 34   | 41   | 29   | 57   | 54    |
| 11390 | 48.5 | 81   | 42   | 82    | 44   | 48.5 | 35   | 74   | 77    |
| 11391 | 49.5 | 66   | 79   | 90    | 40   | 53   | 29   | 57   | 67    |
| 11392 | 46   | 71   | 36.5 | 91.5  | 37.5 | 42.5 | 30   | 64.5 | 67    |
| 11393 | 41   | 64.5 | 34   | 87.5  | 36   | 42.5 | 28   | 62   | 113   |
| 11394 | 30   | 44   | 26   | 68    | 34.5 | 30   | 19   | 40   | 47    |
| 11395 | 46   | 67   | 38.5 | 101   | 40.5 | 41   | 30   | 61   | 79    |
| 11396 | 57   | 64.5 | 38   | 97    | 38   | 51   | 29.5 | 63   | 67    |
| 11397 | 43   | 54   | 35.5 | 101.5 | 35   | 37   | 30   | 56   | 64    |
| 11398 | 47   | 74   | 43   | 101   | 52   | 46   | 38   | 70   | 102.5 |
| 11399 | 53.5 | 72   | 44   | 103   | 39   | 59   | 31   | 65   | 75    |
| 11400 | 52   | 60.5 | 35   | 106   | 34   | 46.5 | 31   | 56   | 62    |
| 11401 | 31   | 37   | 25   | 67    | 32   | 28   | 19   | 41   | 53    |
| 11402 | 44   | 80.5 | 39   | 128   | 40   | 47   | 32   | 74   | 87    |
| 11403 | 36   | 47   | 29   | 109   | 27   | 34   | 20.5 | 46.5 | 45    |
| 11404 | 54   | 57   | 35   | 100.5 | 47   | 42   | 25   | 57   | 70    |
| 11405 | 33   | 41.5 | 31   | 78    | 30   | 29.5 | 20   | 55   | 46.5  |
| 11406 | 46   | 64   | 35   | 98    | 38.5 | 42   | 31   | 59   | 71    |
| 11407 | 33   | 45   | 29.5 | 86    | 32   | 30.5 | 20   | 49   | 49    |
| 11408 | 44   | 54   | 34   | 84.5  | 32   | 37   | 25.5 | 55   | 62    |
| 11409 | 40   | 61.5 | 38   | 89.5  | 38.5 | 41   | 28   | 55   | 66    |
| 11410 | 47   | 67   | 39.5 | 112.5 | 37.5 | 41   | 30   | 65   | 71    |
| 11411 | 47.5 | 78   | 42   | 109   | 47   | 48   | 34   | 72   | 84    |
| 11412 | 62   | 74   | 49   | 90    | 47   | 46   | 32   | 74   | 76    |
| 11413 | 29   | 40   | 26   | 82    | 33   | 30   | 20   | 41.5 | 41    |
| 11414 | 34   | 50.5 | 34   | 70    | 28.5 | 33.5 | 22   | 52   | 61    |
| 11415 | 41.5 | 58   | 32   | 89    | 31.5 | 44.5 | 25.5 | 50   | 54    |
| 11416 | 41   | 70   | 33.5 | 86    | 35   | 40.5 | 29   | 61   | 63    |
| 11417 | 22   | 12   | 38   | 90    | 56.5 | 17   | 13.5 | 19   | 36    |
| 11418 | 20   | 14   | 13   | 49    | 23   | 15   | 8    | 12   | 34    |
| 11419 | 21   | 14   | 19   | 54.5  | 18   | 16.5 | 8    | 22   | 11    |

|       |       |      |      |       |       |      |      |      |       |
|-------|-------|------|------|-------|-------|------|------|------|-------|
| 11420 | 20.5  | 11   | 11   | 16    | 18    | 15   | 8    | 16   | 11    |
| 11421 | 17.5  | 14   | 12   | 51    | 20    | 19   | 7    | 22   | 11    |
| 11422 | 14    | 10   | 15   | 24    | 17    | 14   | 6.5  | 9    | 9     |
| 11423 | 14    | 10   | 10   | 21    | 25    | 13   | 7    | 9    | 8     |
| 11424 | 14    | 11   | 10   | 25    | 18    | 14   | 6.5  | 9    | 23    |
| 11425 | 13    | 10   | 5    | 11    | 8     | 15   | 4    | 4    | 6     |
| 11426 | 11    | 11   | 8    | 12.5  | 15    | 15   | 5    | 8    | 6     |
| 11427 | 24    | 11   | 17   | 40    | 17    | 17   | 8.5  | 11   | 11    |
| 11428 | 13    | 9    | 11   | 17.5  | 12    | 13   | 6    | 9    | 7     |
| 11429 | 21    | 20   | 14.5 | 54.5  | 14.5  | 29   | 9    | 11   | 12    |
| 11430 | 20    | 20   | 13   | 38    | 15.5  | 24.5 | 10.5 | 13   | 13    |
| 11431 | 19    | 18   | 12   | 29    | 14    | 23   | 8    | 12   | 15    |
| 11432 | 18    | 19   | 13   | 53    | 18    | 26   | 8    | 13   | 13    |
| 11433 | 23    | 23   | 18   | 81.5  | 20.5  | 28.5 | 10   | 19   | 23    |
| 11434 | 40    | 25   | 17   | 39    | 25    | 30   | 14   | 43   | 23    |
| 11435 | 65    | 27   | 34.5 | 120   | 32.5  | 29   | 16   | 38   | 77    |
| 11436 | 28    | 23.5 | 29   | 101   | 202.5 | 27   | 13   | 33.5 | 57.5  |
| 11437 | 29    | 21   | 25.5 | 100   | 49    | 28   | 10   | 18   | 23    |
| 11438 | 55    | 25   | 23.5 | 112   | 25    | 28   | 12   | 33   | 36    |
| 11439 | 35    | 20   | 33   | 113   | 41    | 29   | 10   | 28   | 31    |
| 11440 | 33.5  | 23   | 20   | 92    | 25    | 26.5 | 11   | 21.5 | 38.5  |
| 11441 | 56    | 28   | 21   | 102   | 20    | 47   | 11   | 20   | 32.5  |
| 11442 | 31    | 23   | 22.5 | 90    | 22    | 28.5 | 15.5 | 32   | 48    |
| 11443 | 30    | 25   | 25   | 102.5 | 47    | 28   | 11   | 25   | 43    |
| 11444 | 35.5  | 24   | 26   | 98    | 28.5  | 28   | 13   | 27   | 36    |
| 11445 | 41    | 26   | 31   | 114   | 28    | 32   | 17.5 | 27   | 37    |
| 11446 | 34    | 23   | 20   | 105   | 23    | 25   | 12   | 25   | 42    |
| 11447 | 34    | 26   | 31   | 104.5 | 28.5  | 27   | 14   | 34   | 22    |
| 11448 | 34    | 20   | 24   | 119   | 26    | 28   | 11   | 27   | 36    |
| 11449 | 36    | 21   | 22   | 104   | 24.5  | 28   | 11   | 25   | 27    |
| 11450 | 41    | 23   | 25   | 114   | 38.5  | 28   | 12   | 35   | 45    |
| 11451 | 38.5  | 22   | 36.5 | 123   | 27    | 25.5 | 12   | 34   | 58.5  |
| 11452 | 39    | 21   | 23   | 81    | 17.5  | 25   | 12   | 27   | 24    |
| 11453 | 30.5  | 23   | 21   | 99    | 25    | 25   | 19   | 24.5 | 23    |
| 11454 | 27    | 21   | 17   | 98    | 22.5  | 31   | 14   | 18   | 18    |
| 11455 | 24    | 20   | 16   | 69    | 26    | 24   | 16   | 19   | 20    |
| 11456 | 106.5 | 20   | 22   | 85    | 43    | 32   | 13   | 53   | 28    |
| 11457 | 19    | 19   | 14.5 | 87    | 14    | 21   | 8    | 17   | 11    |
| 11458 | 18    | 19   | 15   | 58    | 20    | 22   | 9    | 25   | 11    |
| 11459 | 44    | 58   | 47   | 92.5  | 44    | 53   | 29   | 51   | 83    |
| 11460 | 47    | 74   | 52   | 84    | 44    | 55   | 33   | 58   | 84    |
| 11461 | 52    | 70   | 42   | 89    | 46.5  | 54   | 31.5 | 54   | 73    |
| 11462 | 44    | 61   | 40.5 | 69    | 48    | 49.5 | 30   | 47   | 62.5  |
| 11463 | 50    | 88   | 54   | 111.5 | 53.5  | 58   | 39   | 78   | 94    |
| 11464 | 73    | 50   | 29   | 94    | 43    | 75   | 18   | 38   | 40    |
| 11465 | 47    | 77.5 | 57   | 124   | 60    | 54   | 33   | 77   | 84    |
| 11466 | 51    | 76   | 65   | 128.5 | 47    | 57   | 34   | 62.5 | 112.5 |

|       |      |      |      |       |      |      |      |      |      |
|-------|------|------|------|-------|------|------|------|------|------|
| 11467 | 39   | 56   | 34   | 91    | 38   | 45   | 24   | 46   | 59   |
| 11468 | 57.5 | 85.5 | 50   | 102   | 44.5 | 60   | 44   | 76   | 93   |
| 11469 | 39   | 54   | 38   | 77    | 37   | 42   | 22   | 48.5 | 53   |
| 11470 | 52   | 46.5 | 32   | 71    | 49.5 | 38   | 23   | 48   | 45   |
| 11471 | 35   | 47   | 39   | 103   | 39   | 36.5 | 19   | 37   | 77.5 |
| 11472 | 44   | 67   | 36   | 102   | 46   | 49   | 29   | 61   | 77.5 |
| 11473 | 40.5 | 66   | 43   | 101   | 42   | 47   | 28.5 | 58   | 69   |
| 11474 | 43   | 49   | 37   | 92    | 51.5 | 43   | 24   | 69   | 43   |
| 11475 | 48   | 76   | 42   | 103   | 52   | 54   | 28.5 | 68   | 66.5 |
| 11476 | 41.5 | 65   | 40   | 80.5  | 42   | 43   | 29   | 58   | 84   |
| 11477 | 37   | 53   | 31   | 80    | 41   | 41   | 21   | 38   | 72   |
| 11478 | 57.5 | 60   | 42   | 86    | 42   | 47.5 | 30   | 52   | 58   |
| 11479 | 61.5 | 64   | 50   | 120   | 58   | 42   | 32   | 62   | 65.5 |
| 11480 | 41   | 73   | 46   | 110   | 51   | 53   | 33   | 61   | 71   |
| 11481 | 43   | 69   | 43   | 99    | 44   | 51   | 28   | 60   | 79   |
| 11482 | 34   | 46   | 32   | 80    | 35   | 38   | 25   | 42.5 | 43   |
| 11483 | 51   | 63   | 37   | 110   | 41   | 49   | 36   | 57.5 | 60   |
| 11484 | 41.5 | 66   | 40   | 91    | 44.5 | 49   | 30   | 60.5 | 76   |
| 11485 | 42.5 | 56   | 35   | 93    | 39   | 42   | 26   | 55   | 53.5 |
| 11486 | 52   | 81   | 49.5 | 96    | 48   | 58   | 33   | 70   | 86   |
| 11487 | 58   | 55   | 36   | 105   | 35   | 45   | 23   | 53   | 71   |
| 11488 | 28   | 18   | 25   | 68.5  | 28   | 25.5 | 12   | 17   | 20   |
| 11489 | 57   | 75   | 46   | 99    | 44   | 58   | 34   | 64   | 71   |
| 11490 | 52   | 68   | 44.5 | 109   | 55.5 | 49   | 33.5 | 59   | 74   |
| 11491 | 61   | 59   | 44   | 108   | 46   | 46   | 28   | 68   | 82   |
| 11492 | 48   | 74.5 | 51   | 116.5 | 51.5 | 47   | 34   | 71   | 98.5 |
| 11493 | 53.5 | 80   | 58   | 122   | 51.5 | 54   | 42   | 71   | 74   |
| 11494 | 51   | 56   | 39   | 86    | 39   | 53   | 24   | 48   | 62   |
| 11495 | 46   | 80.5 | 50   | 107   | 54   | 60   | 42   | 73   | 86   |
| 11496 | 40   | 47   | 33   | 119   | 33   | 40   | 22   | 43   | 46   |
| 11497 | 46.5 | 20   | 26   | 114   | 49.5 | 25.5 | 16   | 32   | 22   |
| 11498 | 36   | 19   | 22   | 98    | 32   | 29   | 14   | 21.5 | 26   |
| 11499 | 35   | 25   | 39   | 169   | 47   | 26.5 | 32   | 51   | 22   |
| 11500 | 32   | 17   | 36   | 129.5 | 30   | 24   | 17   | 26   | 20   |
| 11501 | 45   | 20   | 19   | 73    | 34   | 23   | 45   | 20   | 33   |
| 11502 | 28   | 16   | 22.5 | 58    | 47   | 18   | 17   | 18   | 37   |
| 11503 | 57   | 24   | 75   | 82    | 55.5 | 41   | 15   | 23   | 94   |
| 11504 | 42   | 17   | 33   | 124   | 42   | 23   | 15   | 38   | 54   |
| 11505 | 34   | 16   | 20   | 66    | 69   | 21   | 41   | 17   | 27   |
| 11506 | 35   | 24   | 31   | 104   | 44   | 29   | 36   | 63   | 30   |
| 11507 | 36   | 19   | 19   | 57.5  | 60   | 22   | 25   | 16   | 30   |
| 11508 | 32   | 17   | 29   | 75    | 44   | 24   | 17   | 78.5 | 222  |
| 11509 | 14   | 13   | 11.5 | 18    | 21   | 18   | 7    | 10   | 11   |
| 11510 | 15   | 13   | 10   | 16    | 31   | 20   | 7    | 10   | 12   |
| 11511 | 25   | 20   | 17   | 27    | 28   | 28.5 | 13   | 12   | 16   |
| 11512 | 16   | 13.5 | 11   | 26    | 27.5 | 19   | 7    | 11   | 12   |
| 11513 | 19   | 15   | 11   | 21    | 27   | 20   | 8    | 12   | 12   |

|       |      |      |      |       |      |    |      |      |      |
|-------|------|------|------|-------|------|----|------|------|------|
| 11514 | 17   | 16   | 13   | 20    | 26   | 23 | 8    | 9    | 13   |
| 11515 | 42   | 23   | 19   | 47    | 32   | 41 | 21   | 18   | 37   |
| 11516 | 41   | 19   | 21   | 61.5  | 31.5 | 28 | 24   | 18   | 69   |
| 11517 | 14   | 16   | 13   | 15.5  | 40   | 23 | 7.5  | 10   | 71   |
| 11518 | 25   | 16.5 | 20   | 27    | 32.5 | 23 | 10   | 33   | 34.5 |
| 11519 | 22   | 15   | 18   | 44    | 34   | 20 | 10   | 14   | 19   |
| 11520 | 23   | 16   | 15   | 36    | 42   | 24 | 10   | 15   | 14   |
| 11521 | 18   | 13   | 11   | 20    | 29   | 20 | 9    | 13   | 25   |
| 11522 | 22   | 11   | 10   | 28.5  | 24   | 16 | 6    | 10   | 9    |
| 11523 | 22   | 12   | 11   | 38.5  | 27.5 | 17 | 6.5  | 14   | 8.5  |
| 11524 | 18   | 12   | 33   | 42    | 26   | 16 | 8    | 14   | 9    |
| 11525 | 17   | 12   | 10   | 46.5  | 25   | 16 | 8.5  | 11   | 8    |
| 11526 | 32   | 14   | 18   | 33    | 34   | 18 | 31   | 22   | 15   |
| 11527 | 35   | 16   | 16   | 34    | 38   | 25 | 12   | 24   | 16   |
| 11528 | 57.5 | 23   | 35   | 67    | 54   | 36 | 41   | 67.5 | 33   |
| 11529 | 40   | 19.5 | 17   | 37    | 35.5 | 43 | 14   | 38   | 17   |
| 11530 | 73   | 21   | 18   | 40    | 37.5 | 41 | 12.5 | 21   | 30   |
| 11531 | 55   | 23   | 22   | 105   | 68   | 25 | 25   | 46   | 27   |
| 11532 | 61   | 16   | 23   | 81    | 41   | 25 | 14   | 45   | 26.5 |
| 11533 | 23.5 | 15   | 38   | 40    | 43   | 22 | 15   | 34   | 30   |
| 11534 | 28   | 15   | 16   | 77    | 29   | 18 | 13   | 15   | 29   |
| 11535 | 21   | 14   | 16.5 | 75    | 32   | 21 | 8    | 25   | 24   |
| 11536 | 20   | 14   | 15   | 85    | 21   | 19 | 9    | 17   | 13   |
| 11537 | 37.5 | 19   | 35   | 284.5 | 34   | 29 | 24   | 46   | 12   |
| 11538 | 16   | 13   | 11   | 56    | 21   | 19 | 7    | 11   | 8    |
| 11539 | 23.5 | 24   | 17   | 61    | 24   | 22 | 11   | 20   | 34   |
| 11540 | 23   | 13   | 19   | 59    | 67   | 19 | 11   | 15   | 23   |
| 11541 | 24   | 14   | 21   | 97    | 31   | 21 | 10   | 21   | 39   |
| 11542 | 34.5 | 16   | 25   | 66.5  | 35.5 | 20 | 11   | 30   | 99   |
| 11543 | 33   | 14   | 20   | 82    | 34   | 21 | 13   | 27   | 72   |
| 11544 | 31   | 20   | 22   | 90    | 47   | 26 | 20   | 28   | 39   |
| 11545 | 26   | 15   | 19   | 58    | 36   | 22 | 16   | 26   | 34.5 |
| 11546 | 66   | 18   | 23   | 74    | 38.5 | 24 | 37   | 33   | 75   |
| 11547 | 87.5 | 44   | 46   | 296   | 62.5 | 63 | 116  | 66   | 53   |
| 11548 | 24   | 13   | 18   | 49    | 34   | 21 | 13   | 38   | 29   |
| 11549 | 32.5 | 25   | 33   | 89.5  | 48.5 | 32 | 14   | 26   | 161  |
| 11550 | 31   | 13   | 12   | 32    | 30   | 19 | 9    | 23   | 18.5 |
| 11551 | 43   | 66   | 32.5 | 97    | 37   | 42 | 27   | 57   | 76   |
| 11552 | 40   | 57   | 31   | 94    | 35.5 | 39 | 25   | 53   | 62   |
| 11553 | 31   | 36   | 28   | 72    | 31   | 29 | 19.5 | 34   | 40   |
| 11554 | 28.5 | 25   | 20   | 59    | 24   | 27 | 12   | 25   | 36   |
| 11555 | 42   | 36   | 28   | 66    | 29   | 30 | 20   | 35   | 43   |
| 11556 | 48   | 58   | 39   | 103   | 43   | 46 | 28   | 58   | 70   |
| 11557 | 51   | 82   | 46   | 114   | 43   | 57 | 33   | 77   | 86   |
| 11558 | 27   | 32   | 25   | 62.5  | 28.5 | 28 | 17   | 43   | 34   |
| 11559 | 34   | 45   | 26   | 71    | 40   | 35 | 20   | 42   | 49   |
| 11560 | 48   | 51   | 29   | 157   | 32.5 | 46 | 25   | 43   | 46   |



|       |      |      |      |       |      |      |      |      |      |
|-------|------|------|------|-------|------|------|------|------|------|
| 11561 | 40   | 63   | 38.5 | 84    | 35   | 43   | 27   | 53   | 57   |
| 11562 | 74.5 | 69   | 42   | 99    | 45.5 | 46   | 34   | 68   | 82   |
| 11563 | 908  | 78   | 38   | 84    | 41   | 185  | 27   | 60   | 80.5 |
| 11564 | 78   | 59   | 38   | 116   | 39   | 38.5 | 26   | 56   | 58   |
| 11565 | 47   | 65   | 42   | 90    | 45.5 | 47   | 31   | 59   | 68   |
| 11566 | 42.5 | 53   | 34   | 75    | 40.5 | 39   | 26   | 52   | 57.5 |
| 11567 | 46   | 65   | 32   | 76    | 52   | 42   | 23   | 50   | 65   |
| 11568 | 34   | 51   | 32   | 74    | 36   | 40   | 22.5 | 45   | 57   |
| 11569 | 87   | 57.5 | 45   | 90.5  | 42   | 51   | 36.5 | 87.5 | 63   |
| 11570 | 34   | 41   | 32   | 90    | 38   | 33   | 22   | 40   | 40   |
| 11571 | 30   | 43   | 30   | 76    | 39   | 31   | 21   | 41   | 45   |
| 11572 | 25.5 | 30   | 20   | 57    | 31   | 25   | 14   | 29   | 48   |
| 11573 | 40   | 72   | 39   | 88    | 42   | 48   | 31   | 63   | 87   |
| 11574 | 45   | 67   | 35   | 95    | 41   | 43   | 29   | 50   | 65   |
| 11575 | 38   | 59.5 | 35   | 113.5 | 37   | 38   | 26   | 51   | 54   |
| 11576 | 38   | 59   | 42   | 78    | 48.5 | 43   | 27   | 72   | 60   |
| 11577 | 37   | 44   | 28   | 69.5  | 29.5 | 43   | 18   | 35   | 43   |
| 11578 | 53   | 59.5 | 31   | 83    | 36   | 56   | 25   | 47   | 53.5 |
| 11579 | 42   | 63   | 40   | 93    | 41   | 48   | 31   | 61   | 69   |
| 11580 | 39   | 46   | 31   | 84    | 32.5 | 33   | 23   | 44   | 75   |
| 11581 | 46.5 | 74   | 41.5 | 99    | 63.5 | 51.5 | 36.5 | 64   | 72   |
| 11582 | 37   | 56   | 34   | 72.5  | 36.5 | 37.5 | 26   | 51   | 56.5 |
| 11583 | 30   | 35   | 26.5 | 79.5  | 32.5 | 26   | 18   | 38   | 39   |
| 11584 | 49   | 52   | 33.5 | 73    | 39   | 39   | 26   | 47   | 54   |
| 11585 | 26   | 36   | 26   | 67    | 29   | 29   | 18   | 34   | 37.5 |
| 11586 | 52.5 | 68.5 | 38   | 100   | 52.5 | 46   | 31.5 | 56   | 76.5 |
| 11587 | 42   | 64   | 39   | 81    | 56.5 | 45   | 32   | 52   | 67   |
| 11588 | 52   | 43   | 30   | 71    | 33   | 33   | 19   | 40.5 | 45   |
| 11589 | 98   | 39   | 35   | 68    | 34   | 34   | 21   | 40   | 40   |
| 11590 | 53   | 57   | 34   | 86    | 43.5 | 40   | 25   | 49   | 62   |
| 11591 | 33   | 48   | 34   | 90    | 27   | 33   | 22   | 44   | 57   |
| 11592 | 52   | 19   | 23   | 109   | 28   | 22   | 14   | 42.5 | 17   |
| 11593 | 30   | 19   | 18   | 63    | 27   | 23   | 14   | 21   | 25   |
| 11594 | 45   | 21   | 22   | 48    | 42.5 | 25   | 18   | 26   | 24   |
| 11595 | 21   | 18   | 31   | 74    | 21   | 22   | 11   | 22   | 16   |
| 11596 | 19.5 | 14.5 | 16   | 45    | 33   | 17   | 9    | 15   | 10   |
| 11597 | 21   | 18   | 27   | 77    | 35   | 19.5 | 18   | 21.5 | 13   |
| 11598 | 27   | 17   | 28   | 105   | 26   | 20   | 14   | 19   | 15   |
| 11599 | 43   | 17   | 20   | 59    | 28.5 | 21   | 22   | 28.5 | 19.5 |
| 11600 | 19   | 16   | 22   | 33    | 28.5 | 20   | 14   | 20.5 | 18.5 |
| 11601 | 25   | 19   | 19   | 54.5  | 26   | 25   | 14   | 19   | 19   |
| 11602 | 30   | 15   | 14.5 | 40    | 20   | 20   | 12   | 75   | 15   |
| 11603 | 29   | 16   | 18   | 30    | 19   | 24   | 12   | 18   | 30   |
| 11604 | 48   | 20   | 19   | 39    | 27   | 22   | 16   | 103  | 48   |
| 11605 | 46   | 17   | 23   | 26    | 29   | 19   | 17   | 24   | 14   |
| 11606 | 30   | 16   | 14   | 47    | 21   | 19   | 10   | 20   | 11.5 |
| 11607 | 16   | 17.5 | 14   | 26    | 19   | 20   | 9    | 18   | 10   |

|       |      |      |      |       |      |      |      |      |      |
|-------|------|------|------|-------|------|------|------|------|------|
| 11608 | 28   | 15.5 | 12   | 35    | 18   | 18   | 8    | 42   | 10   |
| 11609 | 54   | 22   | 51   | 63    | 39   | 28.5 | 19   | 79   | 18   |
| 11610 | 21   | 19   | 23   | 57.5  | 26   | 19   | 10   | 18   | 21   |
| 11611 | 27   | 16   | 16   | 58    | 23   | 18   | 11   | 18   | 16   |
| 11612 | 61.5 | 20   | 20   | 106   | 31   | 22   | 14.5 | 35   | 48   |
| 11613 | 13.5 | 14   | 10   | 48    | 16   | 17   | 7    | 11   | 11.5 |
| 11614 | 37   | 55   | 37.5 | 70    | 30   | 37   | 26   | 55.5 | 48   |
| 11615 | 62   | 58   | 36   | 108   | 40.5 | 40   | 31.5 | 54   | 58   |
| 11616 | 37   | 43   | 32   | 81    | 31   | 32   | 24   | 70   | 46   |
| 11617 | 89   | 56   | 32   | 95    | 49   | 42.5 | 23   | 42   | 47   |
| 11618 | 41.5 | 67   | 34   | 102   | 35   | 43.5 | 31   | 57   | 71   |
| 11619 | 43   | 74.5 | 41   | 111   | 36   | 45   | 36   | 69   | 100  |
| 11620 | 29   | 40   | 42   | 106   | 48.5 | 31   | 20   | 42   | 52   |
| 11621 | 44   | 39   | 32   | 89    | 32   | 42.5 | 21   | 41.5 | 49.5 |
| 11622 | 72.5 | 61   | 36   | 102.5 | 31   | 55   | 29   | 54   | 55   |
| 11623 | 30   | 77   | 28   | 84    | 44   | 29   | 24   | 40   | 62   |
| 11624 | 32   | 49   | 29   | 91    | 27   | 33   | 24   | 46.5 | 62   |
| 11625 | 42.5 | 45   | 31   | 95    | 34   | 33   | 24.5 | 44   | 70   |
| 11626 | 36   | 62.5 | 36   | 94    | 37   | 41   | 31   | 57   | 63   |
| 11627 | 31   | 45   | 30   | 80    | 26   | 30   | 24   | 42   | 63   |
| 11628 | 27   | 27   | 20.5 | 60.5  | 22   | 23.5 | 15   | 30   | 37   |
| 11629 | 31   | 49   | 31.5 | 80    | 31.5 | 33   | 21   | 44.5 | 55   |
| 11630 | 28   | 47   | 35   | 73.5  | 29   | 33   | 22   | 43.5 | 46   |
| 11631 | 40   | 54   | 32   | 92    | 29   | 36   | 31   | 53.5 | 49   |
| 11632 | 32   | 40.5 | 28   | 78    | 25   | 30   | 21   | 35.5 | 38   |
| 11633 | 30   | 50   | 32   | 84    | 33   | 36   | 22.5 | 45   | 54   |
| 11634 | 41   | 50   | 35   | 83    | 30   | 34   | 22   | 46   | 45   |
| 11635 | 39   | 70   | 39   | 100   | 31   | 42   | 36   | 57   | 61   |
| 11636 | 38   | 54   | 32   | 76    | 30   | 36   | 24   | 50   | 57   |
| 11637 | 48   | 87   | 51   | 128   | 60.5 | 53   | 43.5 | 73   | 76   |
| 11638 | 47.5 | 68   | 44   | 116   | 42   | 45   | 35   | 65   | 71.5 |
| 11639 | 37   | 54   | 40   | 97    | 146  | 43.5 | 25   | 52   | 69   |
| 11640 | 32.5 | 47.5 | 26   | 82.5  | 30.5 | 39   | 21   | 41   | 50   |
| 11641 | 30   | 54.5 | 33   | 72    | 44   | 32   | 22   | 47.5 | 63   |
| 11642 | 42.5 | 67   | 37   | 137   | 32   | 45   | 32   | 55   | 67   |
| 11643 | 53   | 87   | 44   | 114.5 | 44   | 54   | 39   | 75.5 | 87.5 |
| 11644 | 41.5 | 67.5 | 35   | 105   | 32   | 46   | 26   | 54   | 58.5 |
| 11645 | 43   | 80.5 | 47   | 101   | 38   | 59   | 38   | 69   | 87   |
| 11646 | 30   | 48   | 34   | 74    | 26   | 35.5 | 22   | 45   | 53   |
| 11647 | 46   | 72   | 40   | 101   | 35   | 48   | 35   | 64   | 67.5 |
| 11648 | 42   | 78.5 | 39   | 96    | 37.5 | 46   | 32   | 68   | 91   |
| 11649 | 36   | 62   | 34   | 79.5  | 28.5 | 40   | 27   | 54   | 62   |
| 11650 | 33   | 60   | 33   | 80    | 27   | 37   | 23   | 49   | 59   |
| 11651 | 30   | 39   | 26   | 74    | 29   | 29   | 18   | 36   | 43   |
| 11652 | 51.5 | 77   | 44   | 94    | 38   | 56.5 | 38   | 65   | 86.5 |
| 11653 | 35.5 | 69   | 40   | 105   | 34   | 40   | 30.5 | 66   | 81   |
| 11654 | 48   | 81   | 44   | 101   | 36.5 | 47   | 37   | 68.5 | 88   |

|       |      |      |      |       |      |      |      |      |      |
|-------|------|------|------|-------|------|------|------|------|------|
| 11655 | 40   | 60   | 38   | 85    | 34.5 | 36   | 28   | 55   | 64   |
| 11656 | 33   | 54   | 29   | 83.5  | 25   | 41   | 23   | 45   | 52   |
| 11657 | 95.5 | 63   | 42   | 93    | 36.5 | 43   | 33   | 68   | 62   |
| 11658 | 36   | 52   | 30   | 76    | 27   | 36   | 24   | 48   | 49   |
| 11659 | 16   | 12   | 21   | 40    | 20   | 14   | 10   | 15   | 16   |
| 11660 | 35   | 58   | 36   | 87    | 27.5 | 36   | 33   | 61   | 71   |
| 11661 | 45   | 42   | 26   | 66    | 24   | 40   | 19   | 42   | 45   |
| 11662 | 30   | 41   | 29   | 95    | 24   | 33   | 18   | 38   | 51   |
| 11663 | 18.5 | 13   | 20   | 112   | 19   | 17   | 12   | 23   | 13   |
| 11664 | 27   | 36   | 25   | 66    | 27   | 28.5 | 19   | 35   | 35   |
| 11665 | 14   | 17   | 13.5 | 37    | 17.5 | 15.5 | 10   | 14   | 13   |
| 11666 | 13   | 12   | 9.5  | 44.5  | 14   | 14   | 7    | 12   | 8    |
| 11667 | 15   | 19   | 14   | 78    | 16   | 14   | 8    | 14   | 9    |
| 11668 | 17   | 15   | 10.5 | 57    | 15   | 18   | 29   | 15   | 11   |
| 11669 | 14   | 11   | 14   | 75    | 15.5 | 13   | 8    | 16   | 9    |
| 11670 | 11   | 12   | 8    | 61.5  | 12   | 14   | 7    | 11   | 7    |
| 11671 | 22   | 23   | 55   | 69    | 22   | 27   | 10   | 24   | 32   |
| 11672 | 17   | 53   | 16   | 48    | 23   | 21   | 8    | 14   | 13   |
| 11673 | 33   | 22   | 21   | 90.5  | 22.5 | 22   | 10   | 19   | 16   |
| 11674 | 12   | 20   | 9    | 15    | 15   | 21   | 7.5  | 10   | 11   |
| 11675 | 19   | 43   | 14   | 44    | 15   | 25   | 8    | 15   | 20   |
| 11676 | 17   | 18   | 16   | 101   | 17   | 21   | 10   | 21   | 12   |
| 11677 | 16   | 17   | 18   | 56    | 19   | 22   | 10   | 14   | 11   |
| 11678 | 16   | 19   | 15   | 69    | 16   | 23   | 13   | 17   | 12   |
| 11679 | 16.5 | 20   | 17   | 48    | 18   | 23   | 9    | 15   | 14   |
| 11680 | 40   | 21   | 16   | 37    | 39.5 | 27   | 11   | 22   | 22   |
| 11681 | 34   | 19   | 33.5 | 55    | 32   | 25   | 13   | 18   | 26   |
| 11682 | 24   | 22   | 19   | 46    | 31   | 28   | 11.5 | 29   | 26   |
| 11683 | 25   | 20   | 21   | 96    | 42.5 | 22   | 15   | 70.5 | 37   |
| 11684 | 14.5 | 19   | 13   | 50    | 19   | 23   | 9    | 10   | 11   |
| 11685 | 18.5 | 18   | 20   | 69    | 19.5 | 20   | 11   | 19   | 14   |
| 11686 | 15   | 18   | 13   | 34    | 18.5 | 21   | 9    | 9    | 10   |
| 11687 | 20   | 18   | 13   | 38    | 17   | 20   | 9    | 16   | 11   |
| 11688 | 31   | 18   | 13   | 32    | 20   | 23   | 9.5  | 13   | 10   |
| 11689 | 67   | 22   | 23   | 47    | 32   | 30   | 15   | 32   | 19   |
| 11690 | 15   | 21   | 16   | 39    | 18   | 24.5 | 9    | 11   | 12   |
| 11691 | 46   | 82   | 45   | 122   | 48   | 55.5 | 36   | 74   | 84   |
| 11692 | 43   | 71   | 30   | 95    | 42   | 41.5 | 30   | 60   | 67   |
| 11693 | 51   | 83   | 43   | 144   | 48.5 | 55.5 | 39   | 69   | 100  |
| 11694 | 58   | 78.5 | 41   | 118   | 46   | 64   | 32   | 66   | 77.5 |
| 11695 | 58   | 77   | 40   | 115   | 45   | 42   | 65   | 76   | 68   |
| 11696 | 53   | 86   | 47   | 146.5 | 63   | 56   | 37   | 82   | 81   |
| 11697 | 52   | 59   | 31   | 97    | 32   | 52   | 24.5 | 47   | 63   |
| 11698 | 43.5 | 65   | 39   | 110.5 | 42   | 44   | 28.5 | 62.5 | 77   |
| 11699 | 46   | 46   | 30   | 99.5  | 46   | 46   | 25   | 46   | 89   |
| 11700 | 42   | 77   | 40   | 126   | 51   | 49   | 37   | 70   | 82.5 |
| 11701 | 58.5 | 74   | 84   | 160   | 45   | 58   | 33   | 64   | 69   |

|       |      |      |      |       |      |      |      |      |       |
|-------|------|------|------|-------|------|------|------|------|-------|
| 11702 | 45   | 61   | 28   | 112   | 37   | 41   | 27   | 53   | 58    |
| 11703 | 51   | 86.5 | 44.5 | 143.5 | 63   | 54   | 38.5 | 78.5 | 90    |
| 11704 | 39   | 47   | 51.5 | 104   | 35   | 35   | 22   | 45   | 64.5  |
| 11705 | 53   | 68.5 | 54   | 151.5 | 52.5 | 54   | 32.5 | 66.5 | 68    |
| 11706 | 96   | 92.5 | 52   | 150   | 53   | 72   | 48   | 95   | 114.5 |
| 11707 | 58   | 66   | 35   | 132.5 | 39   | 52   | 27   | 58   | 70    |
| 11708 | 54.5 | 80.5 | 44   | 131.5 | 50   | 57   | 39   | 75   | 81.5  |
| 11709 | 44   | 64.5 | 39   | 127   | 39.5 | 45   | 33   | 74   | 59    |
| 11710 | 51   | 36   | 41   | 123   | 43   | 35   | 27   | 46.5 | 54    |
| 11711 | 39   | 60   | 38   | 122.5 | 36   | 40   | 32   | 57   | 61    |
| 11712 | 48   | 73   | 37   | 126   | 41   | 44   | 32   | 67   | 79    |
| 11713 | 49   | 65   | 37   | 124.5 | 43   | 45   | 28   | 62   | 70    |
| 11714 | 50   | 79   | 44   | 119   | 44   | 52   | 34.5 | 67   | 84    |
| 11715 | 54   | 55.5 | 31   | 108.5 | 36   | 58.5 | 25   | 52   | 56    |
| 11716 | 64   | 77.5 | 40   | 123.5 | 42   | 52   | 35   | 72.5 | 81    |
| 11717 | 43.5 | 19   | 18   | 50    | 41   | 22   | 27   | 51.5 | 22    |
| 11718 | 30   | 19   | 16   | 38    | 33   | 21   | 15   | 21   | 15    |
| 11719 | 20   | 13   | 14   | 72    | 23   | 18   | 12   | 21   | 24    |
| 11720 | 46   | 19   | 21.5 | 128   | 31   | 23   | 16.5 | 32   | 43.5  |
| 11721 | 45   | 15   | 25.5 | 53    | 39.5 | 25.5 | 33   | 44   | 19    |
| 11722 | 36   | 17   | 18   | 61    | 33   | 19   | 20   | 25   | 14    |
| 11723 | 29   | 15   | 20   | 114   | 34   | 23   | 12   | 18   | 17    |
| 11724 | 25.5 | 17   | 15   | 180.5 | 30   | 22   | 11   | 35   | 11    |
| 11725 | 49   | 15   | 15   | 82.5  | 27   | 21   | 14   | 25   | 15    |
| 11726 | 37   | 20   | 50   | 218   | 41.5 | 27   | 22   | 99.5 | 61    |
| 11727 | 23   | 18   | 13   | 45    | 80.5 | 19.5 | 14   | 30   | 23    |
| 11728 | 33   | 20   | 16   | 49    | 153  | 26.5 | 12.5 | 19   | 16    |
| 11729 | 32   | 17   | 15   | 35    | 29   | 23   | 13   | 18   | 22    |
| 11730 | 95.5 | 18   | 56   | 120   | 39   | 25   | 29   | 29   | 16    |
| 11731 | 40   | 16   | 17   | 137   | 30   | 21   | 37   | 27   | 21    |
| 11732 | 40   | 19   | 23   | 131.5 | 33   | 23   | 20   | 31   | 20    |
| 11733 | 46.5 | 19.5 | 19.5 | 104.5 | 81   | 27   | 19   | 29   | 21    |
| 11734 | 34   | 16   | 15   | 54    | 32   | 21   | 12   | 20   | 13    |
| 11735 | 22   | 14   | 15   | 45.5  | 31.5 | 18   | 12   | 17   | 17.5  |
| 11736 | 28   | 18   | 15   | 57    | 31.5 | 20   | 14   | 22.5 | 14    |
| 11737 | 65   | 25   | 16   | 132.5 | 38   | 64   | 12.5 | 38   | 45    |
| 11738 | 23   | 16   | 12   | 44.5  | 26   | 23   | 10   | 26   | 166   |
| 11739 | 11   | 10   | 6    | 19    | 20   | 15.5 | 8    | 9    | 7     |
| 11740 | 32   | 14   | 12   | 25    | 62   | 22   | 11.5 | 14   | 14    |
| 11741 | 50   | 23   | 28   | 91.5  | 62.5 | 26.5 | 25   | 38   | 31    |
| 11742 | 29   | 16   | 17   | 110.5 | 27.5 | 23   | 15   | 23   | 15    |
| 11743 | 22   | 16   | 16   | 43    | 32   | 19   | 12   | 19   | 29    |
| 11744 | 22.5 | 12   | 14   | 53.5  | 32   | 18   | 11   | 14.5 | 14.5  |
| 11745 | 31.5 | 19   | 15   | 60.5  | 27.5 | 25   | 14   | 22   | 20    |
| 11746 | 38.5 | 15   | 37.5 | 152.5 | 67   | 20   | 22   | 38   | 23.5  |
| 11747 | 29   | 11.5 | 8.5  | 56    | 20   | 16   | 8    | 16   | 8     |
| 11748 | 23   | 14   | 17   | 108   | 25   | 19   | 11   | 22   | 23    |

|       |      |      |      |       |      |      |      |      |      |
|-------|------|------|------|-------|------|------|------|------|------|
| 11749 | 24   | 14.5 | 17   | 91    | 30   | 16   | 39   | 23.5 | 47   |
| 11750 | 19   | 13   | 17   | 89    | 29   | 17   | 12   | 17   | 12   |
| 11751 | 23   | 14   | 15.5 | 67.5  | 33   | 18   | 11   | 19   | 15   |
| 11752 | 18.5 | 14.5 | 12   | 41    | 25   | 20.5 | 14   | 24   | 11   |
| 11753 | 35   | 22   | 23   | 119.5 | 921  | 29   | 20   | 28.5 | 51   |
| 11754 | 41   | 16   | 20   | 122   | 74   | 25   | 13   | 28   | 36   |
| 11755 | 49   | 16   | 15   | 110.5 | 38   | 35   | 11   | 24   | 29   |
| 11756 | 48.5 | 18   | 27   | 131.5 | 33   | 22   | 22   | 65   | 35.5 |
| 11757 | 44.5 | 15   | 17   | 69    | 40.5 | 17   | 17   | 22.5 | 15   |
| 11758 | 57.5 | 18.5 | 17   | 109   | 40   | 52   | 10   | 22.5 | 19   |
| 11759 | 39.5 | 16   | 61   | 87    | 43   | 19   | 12   | 18   | 23   |
| 11760 | 12.5 | 10   | 6    | 11.5  | 26   | 12   | 8    | 10   | 6    |
| 11761 | 31   | 12   | 17   | 52    | 72   | 17   | 23   | 57   | 16   |
| 11762 | 30   | 19   | 17   | 99    | 32   | 21   | 43   | 37   | 49   |
| 11763 | 26   | 19   | 14   | 54    | 26   | 24   | 12   | 51.5 | 19   |
| 11764 | 36   | 34   | 23   | 98    | 27   | 22   | 18   | 42.5 | 58   |
| 11765 | 21   | 17   | 15   | 78    | 25   | 20   | 11   | 22   | 18   |
| 11766 | 23.5 | 18   | 16   | 58    | 25.5 | 16   | 11   | 22   | 75   |
| 11767 | 24   | 19   | 15   | 74    | 34   | 17.5 | 11   | 21   | 36.5 |
| 11768 | 25   | 16   | 12.5 | 46    | 23   | 16   | 9    | 21   | 45   |
| 11769 | 26   | 14   | 14   | 54    | 21   | 15   | 10   | 21   | 26   |
| 11770 | 32.5 | 17   | 16   | 54    | 34   | 25.5 | 26   | 46   | 32   |
| 11771 | 22   | 13   | 12   | 55.5  | 30   | 18.5 | 10   | 22.5 | 10   |
| 11772 | 30   | 17   | 17   | 78    | 33   | 23   | 16   | 61   | 20   |
| 11773 | 41.5 | 16   | 18   | 61.5  | 29   | 30.5 | 10   | 33   | 23   |
| 11774 | 37   | 20.5 | 23   | 99    | 40   | 26   | 14   | 34   | 23   |
| 11775 | 15   | 10   | 9    | 73    | 21   | 12   | 8    | 14   | 11   |
| 11776 | 28   | 14   | 13   | 38    | 26.5 | 18   | 14   | 27   | 18   |
| 11777 | 19   | 12   | 12   | 57    | 37.5 | 17.5 | 9.5  | 32   | 19   |
| 11778 | 34   | 16   | 16   | 87    | 41   | 19   | 17   | 36   | 52   |
| 11779 | 22   | 12   | 12   | 26    | 34.5 | 16   | 19   | 15   | 13   |
| 11780 | 38   | 55   | 30   | 96    | 42   | 32   | 32   | 60   | 69   |
| 11781 | 37.5 | 66   | 36   | 92    | 39   | 42   | 29   | 66   | 77   |
| 11782 | 40   | 65.5 | 33   | 93    | 41   | 35   | 29   | 74   | 62   |
| 11783 | 29.5 | 42   | 23   | 81    | 31.5 | 30   | 21   | 57   | 43   |
| 11784 | 58   | 54   | 32.5 | 116   | 36.5 | 34   | 29   | 64   | 68   |
| 11785 | 33   | 39   | 28   | 91    | 32   | 29.5 | 20   | 43   | 43   |
| 11786 | 39   | 60   | 40   | 97    | 35   | 41   | 29   | 60   | 60   |
| 11787 | 27   | 30   | 21   | 81    | 24   | 23   | 18   | 34   | 51   |
| 11788 | 33   | 42   | 25   | 78.5  | 33   | 29.5 | 26   | 46   | 55   |
| 11789 | 36   | 40   | 24   | 96    | 32   | 29.5 | 29   | 49   | 55   |
| 11790 | 29   | 42.5 | 23   | 92    | 30   | 33   | 20   | 43   | 49   |
| 11791 | 75.5 | 38   | 19   | 82    | 35.5 | 66   | 16.5 | 39   | 37   |
| 11792 | 58   | 54   | 32   | 115.5 | 33.5 | 35   | 24   | 58   | 64   |
| 11793 | 47   | 80   | 40   | 145   | 43   | 45   | 37   | 83   | 137  |
| 11794 | 53   | 37   | 25.5 | 90    | 29   | 29.5 | 19   | 41   | 51   |
| 11795 | 48   | 68   | 35   | 117   | 36   | 39   | 32   | 64   | 74   |

|       |      |      |      |       |      |      |      |      |       |
|-------|------|------|------|-------|------|------|------|------|-------|
| 11796 | 56.5 | 69   | 35   | 109.5 | 40.5 | 55   | 29   | 62   | 76    |
| 11797 | 38   | 45   | 31   | 105   | 35   | 36   | 24   | 49.5 | 55    |
| 11798 | 27   | 33   | 19   | 72    | 28   | 24   | 18   | 32.5 | 39    |
| 11799 | 36.5 | 59   | 33   | 129   | 36   | 38   | 25   | 59   | 53    |
| 11800 | 34.5 | 54   | 28   | 101   | 32   | 36   | 24   | 53.5 | 56    |
| 11801 | 39   | 33   | 23   | 87    | 32   | 25   | 30   | 37   | 42    |
| 11802 | 54   | 78   | 39   | 107   | 40   | 46.5 | 32.5 | 76   | 92    |
| 11803 | 53   | 75.5 | 38   | 105   | 38   | 44.5 | 40   | 79.5 | 101.5 |
| 11804 | 46.5 | 62   | 33   | 112   | 36   | 37   | 30   | 61   | 55    |
| 11805 | 36   | 65   | 33   | 108   | 35.5 | 37   | 29   | 63   | 57    |
| 11806 | 40.5 | 41   | 23   | 79    | 29   | 30   | 20   | 43   | 45    |
| 11807 | 40   | 75   | 35   | 146   | 38   | 40.5 | 31.5 | 67.5 | 72.5  |
| 11808 | 34   | 37   | 24   | 86.5  | 25   | 27   | 22   | 40   | 42    |
| 11809 | 36   | 59   | 31   | 95    | 32   | 36   | 28   | 54   | 70    |
| 11810 | 38.5 | 35   | 24   | 95    | 29   | 30   | 21   | 43   | 50    |
| 11811 | 43   | 41.5 | 29.5 | 100.5 | 33   | 32   | 21   | 57   | 43    |
| 11812 | 56.5 | 64.5 | 40   | 127.5 | 32   | 41   | 30   | 62   | 85    |
| 11813 | 42   | 53   | 30   | 102   | 34.5 | 34.5 | 26   | 54   | 64    |
| 11814 | 36   | 47   | 28   | 96    | 34   | 32   | 24   | 41   | 43    |
| 11815 | 31.5 | 45   | 23   | 76    | 30   | 28   | 19.5 | 43   | 46    |
| 11816 | 42   | 42   | 25.5 | 71    | 26   | 32   | 24   | 40.5 | 39    |
| 11817 | 44.5 | 48.5 | 31   | 83.5  | 32   | 41   | 22   | 45   | 49    |
| 11818 | 50   | 57   | 32   | 101.5 | 37   | 46   | 27   | 60   | 64    |
| 11819 | 35.5 | 45.5 | 29   | 103   | 31   | 30   | 25   | 45   | 49    |
| 11820 | 40.5 | 53   | 29   | 85    | 32   | 41   | 27   | 54   | 56    |
| 11821 | 53.5 | 77   | 38   | 121   | 39   | 46   | 33   | 71   | 87    |
| 11822 | 41   | 46.5 | 26   | 103   | 28   | 32   | 23   | 50   | 50    |
| 11823 | 29   | 32   | 22   | 79    | 32   | 23   | 17   | 34   | 46    |
| 11824 | 38   | 49   | 24   | 102   | 29.5 | 28.5 | 23   | 43.5 | 48.5  |
| 11825 | 74   | 79   | 50   | 125   | 51   | 54   | 41   | 86   | 79    |
| 11826 | 45   | 68.5 | 76   | 88    | 83.5 | 43   | 84   | 74   | 85    |
| 11827 | 70   | 37   | 27   | 91.5  | 33.5 | 27   | 20   | 40   | 38    |
| 11828 | 36   | 50   | 29   | 88.5  | 33   | 32.5 | 22.5 | 47   | 53    |
| 11829 | 44.5 | 31   | 27   | 159.5 | 63.5 | 23   | 77   | 202  | 20    |
| 11830 | 10.5 | 9    | 5    | 10    | 9    | 13   | 7    | 10   | 6     |
| 11831 | 23   | 12   | 14   | 51.5  | 31   | 13   | 15   | 18   | 13    |
| 11832 | 31.5 | 21   | 14   | 65    | 31   | 23   | 14   | 18   | 20    |
| 11833 | 42   | 23   | 16   | 85    | 30   | 34.5 | 17   | 39   | 35    |
| 11834 | 69.5 | 20   | 11   | 77.5  | 98.5 | 26   | 14   | 40   | 31    |
| 11835 | 247  | 63   | 58   | 200   | 83   | 63   | 62.5 | 318  | 43    |
| 11836 | 38.5 | 21   | 31   | 88    | 32   | 26   | 20   | 19   | 19    |
| 11837 | 41   | 24   | 16   | 72    | 45   | 30   | 15   | 24   | 20    |
| 11838 | 13   | 13   | 7    | 12    | 12   | 18   | 7.5  | 9    | 9     |
| 11839 | 45   | 24   | 41   | 175   | 45   | 34   | 58   | 58   | 20    |
| 11840 | 22   | 21   | 17   | 58    | 28   | 23.5 | 12.5 | 22   | 21    |
| 11841 | 20.5 | 17   | 11   | 63    | 21.5 | 21   | 9    | 12   | 21    |
| 11842 | 53   | 23   | 17   | 63    | 43.5 | 34   | 16   | 27   | 27    |

|       |       |      |      |       |      |       |      |      |       |
|-------|-------|------|------|-------|------|-------|------|------|-------|
| 11843 | 25    | 22   | 16   | 52    | 27   | 27    | 12   | 18   | 54.5  |
| 11844 | 43    | 21   | 31   | 132.5 | 38   | 28    | 87   | 38.5 | 61    |
| 11845 | 24.5  | 20   | 13   | 76    | 25   | 21    | 12   | 16   | 27    |
| 11846 | 27.5  | 17   | 19   | 69    | 27   | 19    | 13   | 18   | 32    |
| 11847 | 44.5  | 24   | 25   | 67    | 29   | 54    | 17   | 38.5 | 20    |
| 11848 | 24    | 20   | 17   | 42    | 24   | 25    | 14   | 24   | 34.5  |
| 11849 | 603   | 245  | 265  | 499.5 | 338  | 348.5 | 311  | 474  | 297   |
| 11850 | 16    | 14   | 9    | 21    | 27   | 19.5  | 13   | 14   | 9     |
| 11851 | 18    | 18   | 11   | 54    | 24.5 | 19    | 12   | 17.5 | 10    |
| 11852 | 49.5  | 58   | 31   | 118   | 50   | 32    | 26   | 56   | 73    |
| 11853 | 34    | 43   | 27   | 81    | 31   | 34    | 21   | 40   | 82    |
| 11854 | 51    | 79.5 | 41   | 104   | 46   | 49    | 37   | 81   | 87    |
| 11855 | 26    | 17   | 18   | 97    | 26   | 28    | 10   | 20.5 | 19    |
| 11856 | 41    | 74   | 43   | 102   | 37.5 | 45    | 32   | 71   | 69    |
| 11857 | 46    | 69   | 39   | 120   | 44   | 49    | 34.5 | 67   | 95    |
| 11858 | 42    | 78   | 38   | 115.5 | 43.5 | 49.5  | 34   | 69   | 95    |
| 11859 | 37    | 48   | 28   | 100   | 29   | 34    | 22   | 48   | 48    |
| 11860 | 32    | 49   | 29   | 96    | 34   | 36    | 24   | 42   | 75    |
| 11861 | 54    | 85   | 46.5 | 124   | 51.5 | 53    | 37.5 | 78   | 92    |
| 11862 | 40    | 56.5 | 32   | 106   | 38   | 38    | 27   | 59   | 72.5  |
| 11863 | 55    | 88   | 51   | 135.5 | 44   | 62    | 42   | 83   | 85    |
| 11864 | 34    | 41   | 23   | 87    | 34   | 32.5  | 20   | 39   | 54    |
| 11865 | 28    | 14   | 17   | 118   | 26.5 | 19    | 14   | 24   | 24    |
| 11866 | 37    | 21   | 27   | 127   | 37   | 27    | 14   | 48   | 46    |
| 11867 | 22    | 15   | 13   | 62    | 23.5 | 21.5  | 8    | 14   | 15    |
| 11868 | 23    | 16   | 19   | 98    | 22.5 | 19    | 10   | 23   | 32    |
| 11869 | 24    | 18.5 | 9    | 27    | 38   | 27    | 9    | 18   | 14    |
| 11870 | 26    | 18   | 19   | 83    | 28   | 23    | 13   | 28   | 38    |
| 11871 | 18    | 13   | 10   | 60.5  | 26   | 18    | 8    | 17   | 10    |
| 11872 | 21    | 17   | 12   | 39    | 27.5 | 21    | 17   | 40   | 14    |
| 11873 | 68    | 22   | 17   | 44    | 32.5 | 25    | 20   | 25   | 20    |
| 11874 | 140   | 19   | 26   | 84    | 35.5 | 24    | 18   | 38   | 58    |
| 11875 | 34.5  | 20.5 | 21   | 90    | 39   | 24.5  | 16.5 | 39.5 | 127   |
| 11876 | 207.5 | 48   | 42   | 117   | 53.5 | 62.5  | 30   | 62   | 204   |
| 11877 | 37    | 22   | 22   | 94    | 31   | 25    | 16   | 34.5 | 80.5  |
| 11878 | 48    | 23   | 27   | 130   | 30   | 25    | 17   | 48   | 26    |
| 11879 | 29.5  | 14   | 16   | 90.5  | 26.5 | 20    | 13   | 24   | 90    |
| 11880 | 115   | 14   | 14   | 35    | 35   | 20    | 20   | 29   | 17    |
| 11881 | 45    | 15   | 16   | 47.5  | 128  | 18.5  | 12   | 21   | 49.5  |
| 11882 | 29    | 14   | 18   | 106   | 23.5 | 20    | 14   | 24   | 49    |
| 11883 | 23    | 23   | 19   | 68    | 25   | 22    | 12   | 25   | 155.5 |
| 11884 | 26    | 17   | 15.5 | 70    | 20   | 19    | 12   | 22   | 17    |
| 11885 | 19.5  | 17.5 | 13   | 38.5  | 41   | 20    | 9    | 13   | 30    |
| 11886 | 39    | 55.5 | 33   | 90    | 44   | 44    | 28   | 44.5 | 57    |
| 11887 | 44    | 54   | 33   | 101   | 37.5 | 47    | 27   | 47   | 51    |
| 11888 | 54    | 51   | 36.5 | 107   | 38.5 | 44    | 23   | 46   | 56    |
| 11889 | 58    | 91   | 49   | 102   | 43   | 62    | 39   | 76   | 79    |

|       |      |      |      |       |      |       |      |      |      |
|-------|------|------|------|-------|------|-------|------|------|------|
| 11890 | 45.5 | 59   | 33   | 97    | 33   | 46    | 25   | 55   | 72   |
| 11891 | 65.5 | 97   | 43   | 128   | 58   | 50    | 33   | 77   | 77   |
| 11892 | 51   | 84   | 46   | 133   | 53.5 | 65.5  | 37.5 | 67   | 85   |
| 11893 | 43.5 | 47   | 33   | 96    | 32   | 45    | 23   | 46   | 53   |
| 11894 | 46   | 62   | 36   | 85    | 43   | 48    | 25   | 55   | 57   |
| 11895 | 36   | 42   | 31   | 87.5  | 35   | 42    | 19   | 40.5 | 53   |
| 11896 | 46.5 | 58   | 41.5 | 89.5  | 36   | 50    | 26   | 47   | 74   |
| 11897 | 36.5 | 40   | 29   | 99    | 79   | 40    | 32   | 36   | 42   |
| 11898 | 50   | 79   | 39   | 109.5 | 39   | 52    | 32   | 64.5 | 82.5 |
| 11899 | 39.5 | 47.5 | 33   | 91    | 40   | 38    | 24   | 40   | 46   |
| 11900 | 47   | 70   | 41   | 105.5 | 40   | 56    | 30   | 66   | 79   |
| 11901 | 60   | 75   | 44   | 97    | 47   | 57    | 30   | 69   | 74   |
| 11902 | 57   | 71   | 45   | 120   | 44   | 52    | 40   | 70   | 83   |
| 11903 | 38   | 49.5 | 32   | 101   | 35.5 | 43    | 24   | 45   | 61.5 |
| 11904 | 120  | 72   | 35   | 97    | 43   | 132   | 25   | 47   | 72   |
| 11905 | 47   | 71   | 46   | 122.5 | 36.5 | 49.5  | 27.5 | 57.5 | 82   |
| 11906 | 43   | 63   | 39   | 106   | 68   | 50    | 33   | 55   | 73   |
| 11907 | 54   | 60   | 43   | 114   | 40.5 | 46    | 29   | 55   | 82   |
| 11908 | 98.5 | 53   | 34   | 102   | 49.5 | 43.5  | 27   | 46   | 70   |
| 11909 | 53   | 51   | 34   | 100   | 34.5 | 44    | 24   | 49   | 91.5 |
| 11910 | 54   | 54   | 36   | 126   | 38   | 43    | 28   | 55   | 69   |
| 11911 | 168  | 67   | 38   | 100.5 | 37   | 114.5 | 25   | 49.5 | 75   |
| 11912 | 37   | 55   | 31   | 89    | 32   | 41    | 45   | 46   | 46   |
| 11913 | 54   | 56   | 36   | 102   | 180  | 43    | 22   | 57   | 49.5 |
| 11914 | 47   | 67   | 39   | 120   | 37   | 49.5  | 29   | 60   | 67   |
| 11915 | 52.5 | 77   | 41   | 119   | 47   | 52    | 32   | 65   | 80   |
| 11916 | 43.5 | 60   | 41   | 115   | 35   | 47    | 30.5 | 60   | 62   |
| 11917 | 57.5 | 57   | 51   | 97    | 52   | 44    | 28   | 53   | 77   |
| 11918 | 70   | 74.5 | 44   | 125   | 50   | 54    | 33   | 95   | 96   |
| 11919 | 53.5 | 79   | 42   | 118   | 50.5 | 50    | 33   | 70   | 92   |
| 11920 | 45   | 56   | 34   | 94.5  | 43   | 40.5  | 27   | 52   | 62.5 |
| 11921 | 63   | 64.5 | 40   | 100   | 37   | 55    | 35   | 58.5 | 78.5 |
| 11922 | 33   | 20   | 22   | 68    | 28   | 30    | 13   | 18   | 20   |
| 11923 | 50   | 56   | 33   | 99    | 42   | 42    | 24   | 51.5 | 95   |
| 11924 | 37   | 32   | 24   | 105   | 37   | 30    | 17   | 29   | 35   |
| 11925 | 43   | 49   | 31   | 84.5  | 37   | 38    | 21.5 | 45   | 68   |
| 11926 | 25   | 22   | 18   | 39    | 26   | 23    | 12   | 19   | 29   |
| 11927 | 31   | 28   | 23   | 57    | 25.5 | 33    | 16   | 47   | 62   |
| 11928 | 45   | 22.5 | 18   | 56.5  | 27   | 25    | 12   | 18   | 47   |
| 11929 | 23   | 19   | 16   | 32    | 28   | 25    | 9    | 17   | 45   |
| 11930 | 26   | 22   | 21   | 40    | 26   | 25    | 10   | 18   | 47   |
| 11931 | 23   | 16   | 21   | 126   | 21   | 21    | 8    | 23   | 12   |
| 11932 | 31.5 | 18   | 24.5 | 106.5 | 55   | 28    | 12   | 21   | 31   |
| 11933 | 44.5 | 21   | 22   | 68    | 37   | 28    | 14   | 33   | 28   |
| 11934 | 31   | 21.5 | 23   | 52    | 33   | 25    | 15   | 24   | 31   |
| 11935 | 31   | 22   | 19.5 | 39    | 27   | 30    | 11   | 19   | 19   |
| 11936 | 25   | 23   | 16   | 51    | 21.5 | 24    | 11   | 17   | 44   |



|       |      |      |      |      |       |      |      |      |      |
|-------|------|------|------|------|-------|------|------|------|------|
| 11937 | 68   | 43   | 48   | 96   | 59    | 48   | 49   | 75.5 | 56   |
| 11938 | 41   | 45   | 40   | 83.5 | 32    | 41   | 21   | 42.5 | 50   |
| 11939 | 41   | 46   | 33.5 | 88   | 31    | 39   | 22   | 43   | 48   |
| 11940 | 54   | 70   | 42   | 116  | 40    | 50.5 | 32   | 66.5 | 80   |
| 11941 | 39   | 52   | 31   | 89   | 34.5  | 40   | 25   | 44   | 49.5 |
| 11942 | 31   | 36   | 29   | 79   | 27.5  | 33   | 20   | 35   | 39   |
| 11943 | 54.5 | 32   | 19   | 69   | 23    | 52   | 13   | 23   | 24   |
| 11944 | 44   | 66.5 | 39   | 115  | 43.5  | 46.5 | 33   | 65   | 64   |
| 11945 | 61   | 85   | 47   | 122  | 129   | 57   | 36   | 81.5 | 85   |
| 11946 | 73   | 46   | 31   | 93   | 36    | 38   | 25   | 48   | 51   |
| 11947 | 43   | 51   | 33   | 95   | 38    | 41   | 27   | 43   | 50   |
| 11948 | 40   | 44   | 29   | 94   | 32    | 41   | 20   | 42   | 57   |
| 11949 | 36.5 | 50   | 32   | 88   | 33    | 36   | 25   | 47.5 | 73   |
| 11950 | 32   | 43   | 29   | 72.5 | 34.5  | 35   | 24   | 42   | 56   |
| 11951 | 37.5 | 47   | 31.5 | 100  | 36.5  | 36   | 39   | 46   | 117  |
| 11952 | 37   | 38   | 26.5 | 85   | 31    | 30   | 19   | 35   | 42   |
| 11953 | 64   | 54   | 32   | 83   | 30    | 66.5 | 19   | 38   | 57   |
| 11954 | 49   | 57   | 32   | 90   | 32    | 44   | 25   | 55   | 61   |
| 11955 | 61   | 56   | 33.5 | 104  | 32    | 46   | 25   | 53.5 | 54   |
| 11956 | 27   | 39   | 27   | 71   | 31    | 28.5 | 29   | 42   | 66   |
| 11957 | 284  | 60   | 36   | 82   | 31    | 52   | 32   | 80   | 59   |
| 11958 | 37   | 26   | 25   | 80   | 30    | 28   | 19   | 48   | 95   |
| 11959 | 16   | 11   | 9    | 27   | 19.5  | 17.5 | 10   | 13   | 14.5 |
| 11960 | 36.5 | 42   | 28   | 83   | 33    | 34   | 20   | 41   | 63   |
| 11961 | 44   | 79   | 42   | 104  | 41    | 42   | 28   | 70   | 98   |
| 11962 | 37   | 73   | 35   | 114  | 39    | 43.5 | 30   | 69   | 76   |
| 11963 | 34   | 18   | 26   | 43   | 38.5  | 22   | 37.5 | 41   | 26   |
| 11964 | 40   | 58   | 31.5 | 101  | 35    | 38   | 27   | 55   | 60   |
| 11965 | 39   | 50   | 37   | 93.5 | 36    | 38   | 26   | 47.5 | 50   |
| 11966 | 24   | 28   | 20   | 58   | 32    | 23   | 16   | 33   | 45   |
| 11967 | 36   | 40   | 26   | 75   | 27    | 28   | 19   | 44   | 43   |
| 11968 | 37   | 56   | 34   | 102  | 54.5  | 39   | 24   | 49   | 62   |
| 11969 | 32.5 | 39   | 27   | 85   | 28    | 32   | 19   | 69   | 38   |
| 11970 | 33.5 | 47   | 30   | 93   | 33.5  | 36   | 23   | 46   | 62   |
| 11971 | 23   | 16   | 19   | 132  | 22    | 20   | 11   | 19   | 14   |
| 11972 | 44   | 63   | 36   | 114  | 43    | 40   | 26.5 | 54   | 60   |
| 11973 | 165  | 62   | 41   | 99   | 38    | 58   | 27   | 62   | 88   |
| 11974 | 45   | 83   | 37   | 111  | 36    | 48   | 43.5 | 67   | 102  |
| 11975 | 34   | 30   | 24   | 72   | 26    | 26   | 17   | 38   | 30.5 |
| 11976 | 21   | 14   | 12   | 30   | 30    | 21   | 12   | 114  | 19   |
| 11977 | 36   | 18   | 15   | 36   | 30    | 30.5 | 12   | 14   | 15   |
| 11978 | 42   | 17   | 17   | 68   | 534.5 | 24   | 16   | 197  | 26   |
| 11979 | 37.5 | 22   | 19   | 36   | 30    | 32   | 20   | 25.5 | 19   |
| 11980 | 20   | 14   | 9    | 22   | 17    | 20   | 8    | 12   | 10   |
| 11981 | 34   | 24   | 15   | 50   | 19    | 34   | 9.5  | 13   | 15   |
| 11982 | 19   | 24.5 | 13   | 42   | 17    | 28   | 13   | 13   | 15   |
| 11983 | 30   | 22   | 19   | 71   | 27    | 29   | 12   | 24   | 18   |

|       |      |      |      |       |      |      |      |       |      |
|-------|------|------|------|-------|------|------|------|-------|------|
| 11984 | 25   | 22   | 16   | 59    | 25   | 28   | 11   | 13    | 16   |
| 11985 | 28.5 | 39   | 21   | 62    | 22   | 38   | 20   | 29    | 39   |
| 11986 | 19   | 23   | 13   | 38.5  | 20.5 | 30   | 10   | 15.5  | 14   |
| 11987 | 34.5 | 25   | 21   | 70    | 26.5 | 32   | 15   | 26    | 19   |
| 11988 | 39.5 | 23   | 18   | 62    | 25   | 32   | 17   | 66    | 18   |
| 11989 | 44   | 23   | 18   | 40    | 41   | 27   | 11   | 115.5 | 19   |
| 11990 | 21   | 22   | 10   | 19    | 32   | 27   | 9    | 9     | 13   |
| 11991 | 20   | 21   | 16   | 32    | 24   | 24   | 11   | 12    | 16   |
| 11992 | 34   | 23   | 17   | 48    | 49   | 27   | 19   | 22    | 61   |
| 11993 | 85   | 26.5 | 26   | 110.5 | 26   | 33   | 16   | 66    | 58   |
| 11994 | 25   | 26   | 29   | 116   | 26   | 31   | 12   | 47    | 23   |
| 11995 | 92.5 | 64.5 | 27   | 102   | 33   | 57   | 32   | 24    | 47   |
| 11996 | 70.5 | 25   | 21   | 89.5  | 31   | 34   | 14   | 29    | 29   |
| 11997 | 17   | 20   | 10   | 16    | 15   | 24.5 | 9    | 10    | 12   |
| 11998 | 19   | 19   | 12   | 46.5  | 17   | 25   | 11   | 14    | 14   |
| 11999 | 25   | 24   | 17.5 | 68    | 19   | 24   | 12   | 18    | 17   |
| 12000 | 21   | 24   | 17   | 71    | 20   | 26   | 10   | 23    | 16   |
| 12001 | 23   | 31   | 21   | 81.5  | 21   | 25   | 10   | 24    | 20   |
| 12002 | 17   | 20   | 13   | 16    | 17   | 24   | 7    | 14    | 12   |
| 12003 | 27.5 | 26   | 20   | 75.5  | 20   | 30   | 14   | 26    | 19.5 |
| 12004 | 22.5 | 23   | 13   | 69    | 16.5 | 24   | 8    | 14    | 20   |
| 12005 | 23   | 25   | 35   | 106.5 | 20.5 | 28   | 12   | 21    | 20   |
| 12006 | 18.5 | 20   | 13   | 46    | 18   | 23   | 10   | 12.5  | 12   |
| 12007 | 18   | 23   | 19   | 50    | 17   | 22   | 9    | 16    | 13   |
| 12008 | 17.5 | 20   | 14   | 81.5  | 18.5 | 23   | 9    | 16    | 13   |
| 12009 | 22   | 20   | 18   | 93    | 20   | 26   | 10   | 18    | 23.5 |
| 12010 | 19   | 20   | 17   | 92.5  | 19   | 24   | 10   | 19    | 16   |
| 12011 | 19   | 18   | 15   | 74    | 17   | 24   | 10   | 18    | 13   |
| 12012 | 24   | 20   | 18   | 137   | 17   | 24   | 11   | 35    | 14   |
| 12013 | 21   | 17   | 18   | 48    | 18   | 25   | 10   | 14    | 13   |
| 12014 | 50   | 21.5 | 25   | 112.5 | 38.5 | 27.5 | 29   | 36    | 27   |
| 12015 | 21.5 | 18.5 | 14   | 49    | 19   | 24   | 10   | 82    | 15   |
| 12016 | 29.5 | 25   | 19.5 | 78    | 22   | 27   | 14.5 | 26    | 22   |
| 12017 | 32.5 | 21   | 21   | 128   | 29   | 27.5 | 18   | 23.5  | 20   |
| 12018 | 34   | 20   | 19   | 75    | 34.5 | 28   | 15.5 | 104   | 25.5 |
| 12019 | 42.5 | 19.5 | 50.5 | 66.5  | 29   | 25   | 62   | 24    | 19   |
| 12020 | 28   | 20   | 17   | 44    | 26   | 26   | 15   | 23    | 21   |
| 12021 | 149  | 57   | 31.5 | 98    | 28.5 | 47   | 21   | 153   | 70   |
| 12022 | 31.5 | 21   | 24   | 66    | 31   | 28   | 15   | 69    | 28   |
| 12023 | 49   | 32   | 27   | 69    | 24   | 35   | 18   | 44.5  | 81   |
| 12024 | 73   | 23   | 22   | 70    | 47.5 | 36   | 33   | 51    | 30   |
| 12025 | 25   | 21   | 16   | 52    | 19   | 23.5 | 10   | 15    | 21   |
| 12026 | 27   | 20   | 18   | 84    | 25   | 24   | 11   | 27    | 18   |
| 12027 | 31   | 19   | 22   | 122   | 26.5 | 22   | 15   | 25    | 19   |
| 12028 | 31   | 19   | 20   | 108   | 33.5 | 25   | 23   | 28    | 31   |
| 12029 | 26   | 21.5 | 18.5 | 156   | 19   | 28   | 12   | 46    | 13   |
| 12030 | 37.5 | 34   | 26   | 94    | 28   | 38   | 17   | 38    | 37   |

|       |      |      |      |       |      |      |      |      |       |
|-------|------|------|------|-------|------|------|------|------|-------|
| 12031 | 32   | 18   | 19   | 39    | 23   | 25   | 12   | 21   | 15    |
| 12032 | 25   | 21   | 21   | 80.5  | 27   | 27   | 16   | 24   | 25    |
| 12033 | 27   | 17   | 16.5 | 94    | 27   | 24   | 15   | 23   | 52.5  |
| 12034 | 28   | 18   | 27   | 61.5  | 29   | 21   | 15   | 22   | 108.5 |
| 12035 | 32   | 22   | 19   | 61    | 104  | 24   | 26   | 32   | 16    |
| 12036 | 58   | 23   | 14   | 35    | 22   | 67   | 11   | 15   | 20    |
| 12037 | 22   | 16   | 16   | 39.5  | 52   | 20.5 | 9    | 15   | 17    |
| 12038 | 28   | 27   | 23   | 68    | 29   | 28   | 16   | 29   | 126   |
| 12039 | 48   | 59   | 35   | 83    | 30   | 37.5 | 27.5 | 66   | 74    |
| 12040 | 28   | 17   | 19   | 64    | 24   | 25.5 | 11   | 20   | 14    |
| 12041 | 50.5 | 18.5 | 18   | 84    | 31.5 | 24   | 17.5 | 26   | 52    |
| 12042 | 42   | 57   | 36   | 95    | 42   | 47   | 24   | 57   | 56    |
| 12043 | 51   | 53   | 38   | 109   | 43   | 46   | 33   | 48   | 58    |
| 12044 | 59   | 83   | 43   | 109   | 42.5 | 61.5 | 37   | 63.5 | 82    |
| 12045 | 51   | 71   | 41   | 110   | 43.5 | 54.5 | 45   | 53   | 65.5  |
| 12046 | 69   | 81   | 55   | 127.5 | 49   | 70   | 35   | 54   | 92    |
| 12047 | 45   | 59   | 39   | 112   | 46   | 40.5 | 25   | 53   | 57    |
| 12048 | 49   | 59   | 45   | 88    | 40   | 43   | 29   | 60   | 60    |
| 12049 | 56.5 | 75   | 44   | 119   | 39.5 | 57   | 30   | 59   | 74    |
| 12050 | 64   | 75.5 | 46   | 128.5 | 46   | 63   | 35   | 63   | 111.5 |
| 12051 | 64   | 84   | 46   | 127   | 49   | 70   | 36   | 64   | 88    |
| 12052 | 64.5 | 82   | 44   | 139   | 49   | 66.5 | 30   | 55   | 70.5  |
| 12053 | 88   | 81.5 | 43.5 | 116   | 40   | 51   | 36.5 | 78.5 | 75    |
| 12054 | 49.5 | 83   | 45   | 136.5 | 45   | 50   | 35   | 82.5 | 95    |
| 12055 | 62.5 | 40   | 31   | 106   | 26   | 39   | 42   | 34.5 | 51    |
| 12056 | 50.5 | 63   | 43   | 120.5 | 38   | 53.5 | 33   | 56   | 82    |
| 12057 | 63.5 | 75   | 46   | 118   | 48   | 56   | 34   | 68   | 66    |
| 12058 | 59   | 58   | 34   | 96    | 34.5 | 53.5 | 25   | 48   | 47    |
| 12059 | 72   | 99   | 55   | 133   | 60   | 79   | 45   | 77.5 | 104   |
| 12060 | 85   | 100  | 61   | 194   | 63   | 84   | 45   | 90.5 | 112.5 |
| 12061 | 47.5 | 40   | 27   | 120   | 28   | 32   | 18   | 40   | 45.5  |
| 12062 | 59   | 74   | 45   | 127   | 43.5 | 56   | 74   | 70   | 74    |
| 12063 | 61   | 77   | 53   | 130.5 | 41   | 62   | 33   | 70   | 86    |
| 12064 | 48.5 | 55   | 40.5 | 89    | 32   | 50.5 | 22   | 44   | 49    |
| 12065 | 68.5 | 74   | 48   | 129   | 54.5 | 66.5 | 33   | 69   | 85.5  |
| 12066 | 39   | 59   | 38   | 107.5 | 35   | 39   | 22   | 52   | 60    |
| 12067 | 53   | 45.5 | 34   | 95    | 34.5 | 40   | 21   | 43   | 48    |
| 12068 | 49   | 62.5 | 34   | 89    | 34   | 49   | 24   | 49.5 | 60.5  |
| 12069 | 54.5 | 63   | 36   | 134   | 45   | 53   | 27   | 51   | 78    |
| 12070 | 43   | 42   | 26   | 89    | 27   | 32   | 22   | 38.5 | 79    |
| 12071 | 27   | 20   | 21   | 81.5  | 28   | 24   | 11   | 21   | 30.5  |
| 12072 | 29   | 23   | 21   | 67.5  | 23.5 | 28   | 11   | 17   | 23    |
| 12073 | 29   | 25   | 19   | 81    | 26   | 32   | 12   | 19   | 68    |
| 12074 | 54   | 58   | 41   | 87.5  | 36   | 48   | 26   | 46   | 64    |
| 12075 | 26   | 24   | 16   | 45    | 22   | 30   | 14   | 16   | 15    |
| 12076 | 54   | 29   | 23   | 62    | 40   | 46   | 25   | 60.5 | 30    |
| 12077 | 48   | 17   | 26   | 101   | 146  | 24   | 14   | 59   | 20    |

|       |       |      |       |       |      |      |      |      |      |
|-------|-------|------|-------|-------|------|------|------|------|------|
| 12078 | 86    | 18   | 18    | 149   | 29   | 24   | 16   | 21   | 17   |
| 12079 | 62.5  | 25   | 18    | 60    | 31   | 40   | 15   | 30   | 18   |
| 12080 | 66    | 26   | 20    | 46    | 28   | 28   | 12   | 17.5 | 39   |
| 12081 | 51.5  | 24   | 15.5  | 37.5  | 32   | 38   | 19.5 | 24   | 26   |
| 12082 | 210   | 29   | 29    | 51    | 43   | 45.5 | 24   | 135  | 33   |
| 12083 | 48    | 34   | 27    | 55.5  | 65   | 43.5 | 21   | 42.5 | 31   |
| 12084 | 58.5  | 30   | 24    | 121   | 29   | 41   | 18   | 31   | 40   |
| 12085 | 16    | 10   | 11    | 50    | 16   | 14   | 6    | 13   | 7    |
| 12086 | 16    | 14   | 9     | 32    | 18   | 18   | 7    | 12   | 8    |
| 12087 | 34    | 21   | 18    | 65    | 20   | 28   | 25   | 18   | 15   |
| 12088 | 27    | 21   | 26    | 66.5  | 23.5 | 29   | 13   | 20   | 23   |
| 12089 | 36    | 23   | 18    | 104   | 29   | 31   | 13   | 18   | 37   |
| 12090 | 93    | 28   | 31.5  | 52.5  | 41   | 39   | 19   | 34   | 60   |
| 12091 | 48    | 28   | 25    | 38    | 129  | 41   | 27   | 45   | 24   |
| 12092 | 68    | 32   | 35    | 117.5 | 34   | 46   | 20   | 99   | 64.5 |
| 12093 | 62    | 19   | 23    | 93    | 27.5 | 39   | 22   | 36   | 26   |
| 12094 | 44    | 24   | 17    | 40    | 31   | 23   | 13.5 | 26   | 15   |
| 12095 | 38    | 21.5 | 24    | 93    | 32   | 27   | 14   | 20   | 23   |
| 12096 | 50    | 21   | 18    | 44    | 28   | 27   | 33.5 | 100  | 19   |
| 12097 | 206   | 40   | 43    | 134   | 56   | 46   | 45   | 198  | 34   |
| 12098 | 59    | 38.5 | 18    | 126.5 | 29   | 57   | 65   | 32   | 41   |
| 12099 | 84    | 40.5 | 33    | 174   | 42   | 51   | 108  | 47.5 | 40   |
| 12100 | 220   | 42   | 24    | 87    | 38   | 122  | 22   | 78   | 68   |
| 12101 | 29    | 14   | 15    | 87    | 28   | 17.5 | 11   | 15   | 13.5 |
| 12102 | 18.5  | 14   | 10    | 25    | 15.5 | 17   | 7    | 18   | 11   |
| 12103 | 25    | 17   | 13    | 32    | 67.5 | 22   | 9    | 25   | 12   |
| 12104 | 35.5  | 21   | 15    | 35    | 25   | 33.5 | 10   | 74   | 14   |
| 12105 | 48    | 21   | 15    | 35    | 25   | 35   | 13   | 57   | 15   |
| 12106 | 44.5  | 21   | 18.5  | 43.5  | 23   | 33   | 11   | 21   | 17   |
| 12107 | 44.5  | 23   | 18    | 48.5  | 23   | 33   | 51   | 17   | 21.5 |
| 12108 | 67    | 28   | 21    | 176.5 | 36   | 41   | 20   | 156  | 28.5 |
| 12109 | 51    | 13   | 16.5  | 31    | 32.5 | 17   | 13   | 36   | 14   |
| 12110 | 34.5  | 18   | 18    | 55    | 69.5 | 23   | 26   | 74   | 21   |
| 12111 | 54.5  | 20   | 110.5 | 53    | 53   | 42   | 18   | 79.5 | 17   |
| 12112 | 354.5 | 67   | 36    | 42    | 44   | 330  | 29   | 83   | 121  |
| 12113 | 47    | 23   | 23    | 67.5  | 38   | 30   | 22   | 44   | 24   |
| 12114 | 481.5 | 26   | 23    | 106   | 29   | 38   | 16   | 33   | 79   |
| 12115 | 62.5  | 25   | 20    | 46    | 29.5 | 35   | 14   | 33   | 22   |
| 12116 | 45    | 24   | 21    | 103   | 25   | 34   | 16   | 26   | 27   |
| 12117 | 44.5  | 30   | 26    | 90    | 37   | 43   | 27   | 24   | 31   |
| 12118 | 47.5  | 38   | 28    | 132   | 34   | 49.5 | 21   | 28   | 121  |
| 12119 | 38    | 8    | 14    | 56    | 19   | 8    | 12   | 15   | 14   |
| 12120 | 16.5  | 11   | 11    | 45    | 17   | 12.5 | 8    | 13   | 12   |
| 12121 | 24    | 12   | 15    | 70.5  | 20   | 16.5 | 10   | 13   | 73   |
| 12122 | 29.5  | 16   | 24    | 158   | 24   | 20   | 15   | 25   | 11   |
| 12123 | 42    | 22   | 18    | 64    | 27   | 28   | 20   | 39   | 20   |
| 12124 | 27    | 17   | 16    | 65    | 22.5 | 24   | 15   | 17   | 30   |

|       |       |      |      |       |      |      |      |      |      |
|-------|-------|------|------|-------|------|------|------|------|------|
| 12125 | 40    | 24   | 23   | 75    | 51.5 | 31   | 38   | 23   | 22   |
| 12126 | 101   | 27   | 23   | 90    | 29   | 65   | 13   | 30   | 28   |
| 12127 | 81.5  | 14   | 23   | 155.5 | 52.5 | 19   | 21   | 56   | 59   |
| 12128 | 21    | 8    | 15   | 72    | 21   | 11   | 9    | 16   | 17.5 |
| 12129 | 19    | 13   | 10   | 47    | 17.5 | 16   | 11   | 13   | 11   |
| 12130 | 27    | 13   | 15   | 31    | 22   | 19   | 12   | 19   | 24   |
| 12131 | 56.5  | 16   | 16   | 33    | 32   | 21   | 11   | 35   | 16   |
| 12132 | 49.5  | 26   | 27   | 121   | 41.5 | 34   | 19   | 60.5 | 46.5 |
| 12133 | 42    | 23   | 19   | 75    | 33   | 34   | 17   | 24   | 23   |
| 12134 | 145   | 33   | 30.5 | 95    | 40.5 | 60   | 20   | 51   | 310  |
| 12135 | 45.5  | 22   | 31   | 146   | 53   | 24   | 24   | 80   | 50   |
| 12136 | 15    | 11   | 9    | 12    | 14   | 13   | 7    | 11   | 7    |
| 12137 | 19    | 11.5 | 12   | 17    | 19   | 12   | 11   | 11   | 9    |
| 12138 | 20    | 13   | 12   | 24    | 31.5 | 16   | 9    | 15   | 13   |
| 12139 | 37    | 16   | 20   | 81.5  | 31   | 18   | 13   | 23   | 21   |
| 12140 | 56.5  | 84.5 | 46   | 112   | 85   | 56   | 34   | 67   | 77   |
| 12141 | 50    | 44.5 | 31   | 94    | 31   | 49   | 22   | 42   | 60.5 |
| 12142 | 51.5  | 72   | 43.5 | 107.5 | 41   | 42.5 | 33   | 79   | 73   |
| 12143 | 34    | 41   | 33   | 76    | 25.5 | 31   | 20   | 63   | 54   |
| 12144 | 35    | 35   | 29   | 65    | 24   | 25   | 17   | 31.5 | 36   |
| 12145 | 44    | 74   | 45   | 96.5  | 39.5 | 48.5 | 35   | 73.5 | 81.5 |
| 12146 | 23    | 21   | 18   | 75    | 35   | 21   | 13   | 26.5 | 24   |
| 12147 | 47.5  | 57.5 | 32   | 96    | 33.5 | 43   | 22   | 48.5 | 80   |
| 12148 | 54    | 82   | 43   | 126   | 46.5 | 53   | 35   | 68   | 108  |
| 12149 | 33.5  | 39   | 32   | 77    | 31   | 26   | 23   | 42.5 | 53.5 |
| 12150 | 32    | 24   | 18.5 | 90    | 30.5 | 19   | 16   | 28   | 20   |
| 12151 | 39    | 55   | 33   | 96.5  | 30   | 37   | 22   | 48   | 59   |
| 12152 | 46.5  | 56   | 33   | 112   | 31.5 | 41   | 24   | 53   | 58   |
| 12153 | 39    | 44   | 30   | 100   | 29   | 34.5 | 22   | 46   | 40   |
| 12154 | 23    | 20   | 16   | 66    | 23.5 | 23   | 12   | 18.5 | 28   |
| 12155 | 55    | 81   | 50   | 113   | 45   | 61   | 41   | 72   | 98   |
| 12156 | 33    | 52   | 29   | 80    | 31.5 | 30.5 | 23   | 47   | 51   |
| 12157 | 45    | 70   | 41   | 91    | 35   | 44   | 29.5 | 64   | 73   |
| 12158 | 19    | 13.5 | 12   | 41    | 14.5 | 15   | 8    | 13   | 12   |
| 12159 | 37    | 56   | 39   | 79    | 31   | 43.5 | 28   | 49.5 | 65   |
| 12160 | 42.5  | 61   | 34.5 | 99    | 36   | 42   | 26   | 50   | 84   |
| 12161 | 31    | 27   | 23   | 87    | 27   | 27   | 15   | 27   | 42   |
| 12162 | 37.5  | 42   | 27   | 79    | 35.5 | 40   | 20.5 | 34   | 53.5 |
| 12163 | 38    | 58   | 37   | 89    | 28   | 35.5 | 27   | 54   | 58   |
| 12164 | 43    | 57.5 | 33   | 102   | 36.5 | 35   | 28   | 56.5 | 65   |
| 12165 | 27    | 23   | 18   | 80.5  | 21   | 18   | 12   | 25   | 89   |
| 12166 | 53    | 72   | 43   | 111   | 59   | 50   | 35   | 70   | 84   |
| 12167 | 51    | 58   | 36   | 99    | 37.5 | 45   | 29   | 53   | 82   |
| 12168 | 52.5  | 53   | 33   | 101   | 34   | 40.5 | 24   | 53   | 52   |
| 12169 | 102.5 | 57   | 34   | 177   | 110  | 81   | 27   | 56   | 106  |
| 12170 | 34    | 29   | 23   | 74    | 25   | 29   | 18   | 32   | 36   |
| 12171 | 47    | 44   | 33   | 88    | 31   | 36.5 | 19   | 72   | 55   |

|       |      |      |      |       |       |      |       |      |      |
|-------|------|------|------|-------|-------|------|-------|------|------|
| 12172 | 39   | 51   | 37   | 101.5 | 38    | 36   | 25    | 68   | 60.5 |
| 12173 | 48   | 83   | 44   | 106   | 43.5  | 48   | 33    | 66   | 92.5 |
| 12174 | 49   | 47   | 30.5 | 128.5 | 25    | 49   | 12    | 36   | 47   |
| 12175 | 19.5 | 8    | 13   | 66    | 18    | 11   | 10    | 57   | 10   |
| 12176 | 46   | 48   | 44   | 91    | 32    | 36   | 26    | 88   | 63.5 |
| 12177 | 21.5 | 16   | 14   | 29    | 15    | 16   | 9     | 11   | 38   |
| 12178 | 57   | 71   | 43   | 109.5 | 35    | 44   | 32    | 66.5 | 69   |
| 12179 | 40.5 | 37   | 23   | 93    | 26    | 37   | 18    | 38   | 60   |
| 12180 | 69   | 42   | 26   | 85    | 29    | 59   | 21    | 38   | 50   |
| 12181 | 24   | 20   | 20   | 37    | 23    | 27   | 14    | 19   | 15   |
| 12182 | 22.5 | 16   | 14   | 75    | 24.5  | 17.5 | 10    | 21   | 22   |
| 12183 | 37   | 64   | 33   | 124   | 31    | 35   | 27    | 56   | 67   |
| 12184 | 23   | 13   | 19   | 63    | 15    | 14   | 11    | 15   | 11   |
| 12185 | 21.5 | 14   | 12   | 52    | 30.5  | 17   | 24.5  | 14   | 10   |
| 12186 | 23   | 14   | 9    | 35    | 19    | 18   | 8     | 14   | 18   |
| 12187 | 24   | 19   | 14   | 33    | 53    | 27   | 10    | 16   | 31   |
| 12188 | 23   | 17   | 13   | 63    | 24    | 25   | 11    | 18   | 16   |
| 12189 | 32   | 17   | 15   | 74    | 22    | 28   | 12    | 17.5 | 25   |
| 12190 | 37   | 13.5 | 32.5 | 48    | 43    | 18   | 54.5  | 27   | 18   |
| 12191 | 17   | 11   | 9    | 44    | 15.5  | 14   | 9     | 10   | 8    |
| 12192 | 25   | 12   | 13   | 29.5  | 43    | 16   | 12    | 77   | 18   |
| 12193 | 163  | 20   | 19   | 48    | 27.5  | 26   | 20    | 53   | 17   |
| 12194 | 26   | 14   | 13   | 61    | 20.5  | 21   | 9.5   | 15   | 10   |
| 12195 | 28   | 17   | 17   | 65    | 26    | 26   | 34.5  | 19   | 18   |
| 12196 | 32   | 20   | 16   | 41    | 27.5  | 33   | 11    | 16   | 21   |
| 12197 | 94   | 24   | 25.5 | 85    | 47    | 37   | 27    | 34   | 41   |
| 12198 | 24   | 19   | 14   | 50.5  | 26    | 30   | 10    | 42   | 13   |
| 12199 | 17.5 | 17   | 11   | 43.5  | 15    | 18   | 7     | 11   | 11   |
| 12200 | 22.5 | 20   | 14   | 39    | 21    | 24   | 11    | 26   | 12   |
| 12201 | 24   | 22   | 16   | 32    | 41    | 23   | 19    | 14.5 | 16   |
| 12202 | 22   | 22.5 | 21   | 54    | 21    | 26   | 12    | 17   | 28   |
| 12203 | 38   | 20   | 17   | 44    | 18.5  | 27   | 11    | 20   | 16   |
| 12204 | 59   | 20.5 | 15   | 55    | 40    | 24   | 10    | 25   | 15   |
| 12205 | 77   | 36   | 34.5 | 58    | 194   | 28   | 97    | 97   | 19   |
| 12206 | 22   | 15   | 13   | 28    | 17    | 20   | 10    | 13.5 | 13   |
| 12207 | 16.5 | 17   | 11   | 40    | 21.5  | 20   | 8     | 12   | 19   |
| 12208 | 17   | 15   | 13   | 37    | 19    | 18   | 9     | 11.5 | 16.5 |
| 12209 | 22   | 15   | 12   | 42    | 17    | 19   | 10    | 12   | 13   |
| 12210 | 25.5 | 18   | 20.5 | 40.5  | 31    | 20   | 11    | 16   | 16   |
| 12211 | 22   | 18   | 13   | 42    | 19    | 21   | 9     | 17   | 18   |
| 12212 | 22   | 18   | 16   | 43    | 58    | 21   | 11    | 15   | 18   |
| 12213 | 23   | 15.5 | 12   | 33    | 22.5  | 26   | 14    | 13   | 17   |
| 12214 | 28   | 17   | 16   | 34    | 21    | 22.5 | 11    | 109  | 14   |
| 12215 | 17   | 15.5 | 12   | 34    | 20    | 15   | 9     | 14   | 9    |
| 12216 | 31   | 17   | 17   | 49    | 26    | 22   | 13    | 17   | 16   |
| 12217 | 20.5 | 16   | 10   | 35    | 14.5  | 19   | 8     | 10   | 15   |
| 12218 | 1200 | 222  | 301  | 430   | 236.5 | 277  | 329.5 | 744  | 231  |

|       |      |      |      |       |       |      |      |      |      |
|-------|------|------|------|-------|-------|------|------|------|------|
| 12219 | 35.5 | 18   | 24   | 129   | 25    | 23.5 | 17   | 26   | 28   |
| 12220 | 37.5 | 19   | 17   | 59    | 121.5 | 19   | 15   | 16   | 34   |
| 12221 | 29   | 19   | 20   | 99    | 24.5  | 21.5 | 19   | 22   | 17   |
| 12222 | 16   | 16.5 | 11   | 42    | 16.5  | 18   | 7    | 12   | 12   |
| 12223 | 30   | 18   | 23.5 | 107   | 21    | 22   | 10   | 26.5 | 43   |
| 12224 | 45   | 13   | 12   | 41    | 26    | 16   | 10   | 51   | 44   |
| 12225 | 26   | 18.5 | 14   | 48    | 20    | 23.5 | 10   | 55   | 18   |
| 12226 | 24   | 17   | 28   | 81    | 25    | 21   | 31   | 22   | 56   |
| 12227 | 36   | 19   | 31   | 135.5 | 27    | 23   | 13.5 | 49   | 76   |
| 12228 | 50   | 25   | 38   | 121   | 32    | 27   | 20   | 71   | 109  |
| 12229 | 24   | 19   | 16   | 74    | 22.5  | 23   | 13   | 23   | 16   |
| 12230 | 115  | 17   | 13   | 54.5  | 17    | 18   | 12   | 12   | 12   |
| 12231 | 24   | 15.5 | 15   | 41    | 23    | 14   | 10   | 14   | 28   |
| 12232 | 29   | 18   | 20   | 76    | 29    | 20   | 27   | 47.5 | 57   |
| 12233 | 13   | 15   | 12   | 39    | 14    | 14   | 7    | 8    | 7    |
| 12234 | 20   | 15   | 9    | 40    | 18    | 15   | 9    | 12   | 109  |
| 12235 | 34.5 | 15.5 | 12   | 40    | 15    | 16   | 16   | 21   | 10   |
| 12236 | 25.5 | 16   | 12   | 51    | 16    | 17.5 | 8    | 13   | 15   |
| 12237 | 14   | 16   | 11   | 48    | 16.5  | 16.5 | 8    | 14   | 11   |
| 12238 | 14   | 14   | 12.5 | 66    | 14.5  | 17   | 7    | 13   | 21   |
| 12239 | 29   | 16.5 | 17   | 97    | 21    | 16   | 61   | 27   | 79.5 |
| 12240 | 45.5 | 21   | 22   | 69.5  | 23    | 30   | 15   | 24   | 22   |
| 12241 | 25   | 15   | 13   | 31    | 19    | 22   | 10.5 | 15   | 28   |
| 12242 | 39   | 28   | 16   | 29    | 257   | 30   | 17   | 25   | 54   |
| 12243 | 39   | 22.5 | 13   | 19    | 296   | 19   | 16.5 | 13.5 | 52   |
| 12244 | 77   | 91   | 80   | 129   | 33    | 52.5 | 18   | 383  | 47   |
| 12245 | 26   | 15   | 16   | 47    | 18.5  | 21   | 15   | 96   | 17   |
| 12246 | 44   | 22   | 17   | 61    | 21    | 29   | 11.5 | 18   | 23   |
| 12247 | 19   | 13   | 65   | 44    | 18    | 18.5 | 9    | 20   | 14   |
| 12248 | 96.5 | 23   | 32   | 76.5  | 37    | 39   | 23   | 76   | 38   |
| 12249 | 18   | 16   | 12   | 32    | 21    | 16   | 13   | 37   | 13   |
| 12250 | 22   | 16   | 15   | 52    | 24    | 16   | 12   | 17   | 16   |
| 12251 | 29   | 15   | 16.5 | 59.5  | 18    | 21   | 11   | 12   | 13   |
| 12252 | 16   | 15.5 | 24   | 57    | 43    | 16   | 29   | 22   | 10   |
| 12253 | 68.5 | 81   | 51   | 103   | 61.5  | 75   | 36   | 67.5 | 86   |
| 12254 | 31   | 25   | 25   | 64    | 30    | 27   | 15   | 22   | 34   |
| 12255 | 69   | 87   | 58   | 136.5 | 57.5  | 65   | 47   | 72   | 102  |
| 12256 | 48   | 71   | 44   | 93    | 52    | 52   | 41   | 60   | 72   |
| 12257 | 37   | 37   | 26.5 | 90    | 59    | 40   | 18   | 32.5 | 54   |
| 12258 | 59   | 70   | 44   | 105   | 59    | 60   | 30   | 59   | 81   |
| 12259 | 70   | 85   | 42   | 101   | 47    | 65   | 37   | 68   | 77   |
| 12260 | 44.5 | 79   | 43   | 93    | 55    | 53   | 30.5 | 70   | 80   |
| 12261 | 53   | 88   | 41   | 139   | 51    | 55   | 29.5 | 58.5 | 77   |
| 12262 | 56   | 80   | 48.5 | 103   | 52.5  | 55.5 | 39   | 77.5 | 91   |
| 12263 | 40   | 55   | 34   | 100   | 57    | 42   | 26   | 45.5 | 65   |
| 12264 | 50.5 | 39   | 29   | 106   | 39    | 43   | 21   | 41   | 95   |
| 12265 | 58.5 | 65   | 42   | 89.5  | 55.5  | 52.5 | 32   | 62   | 63   |

|       |      |      |      |       |      |      |      |      |      |
|-------|------|------|------|-------|------|------|------|------|------|
| 12266 | 55   | 82.5 | 53   | 136.5 | 55.5 | 60   | 47   | 73.5 | 92   |
| 12267 | 43   | 63   | 38.5 | 92    | 58   | 46   | 31   | 55   | 65   |
| 12268 | 36.5 | 50   | 38   | 85    | 40   | 44.5 | 22   | 36   | 51   |
| 12269 | 60.5 | 42   | 37   | 155   | 59   | 45   | 30   | 46   | 45   |
| 12270 | 68   | 68   | 59   | 104   | 52   | 52   | 31   | 63   | 64   |
| 12271 | 68   | 80.5 | 45   | 111.5 | 59   | 61   | 37   | 72   | 122  |
| 12272 | 46   | 58   | 39   | 89.5  | 59   | 45   | 31   | 59   | 63.5 |
| 12273 | 43   | 45   | 30   | 72    | 85   | 40   | 23   | 42   | 37   |
| 12274 | 50.5 | 83   | 55   | 121   | 77   | 58.5 | 36   | 69.5 | 103  |
| 12275 | 49   | 88   | 46   | 101   | 54   | 64   | 38   | 76   | 82   |
| 12276 | 55   | 79.5 | 56   | 128   | 57   | 58   | 33   | 67   | 81   |
| 12277 | 55.5 | 96.5 | 50   | 127   | 74   | 60   | 42   | 83   | 100  |
| 12278 | 46.5 | 67   | 39   | 102   | 47   | 49   | 31   | 61.5 | 61.5 |
| 12279 | 38.5 | 53   | 32   | 91    | 40   | 38   | 27   | 52.5 | 68   |
| 12280 | 52   | 88   | 50.5 | 93.5  | 58   | 64.5 | 40   | 77   | 124  |
| 12281 | 44   | 56   | 33.5 | 94    | 46.5 | 41.5 | 27   | 49   | 57   |
| 12282 | 47   | 62   | 42   | 105   | 49.5 | 45   | 33   | 61   | 92   |
| 12283 | 48   | 60   | 30   | 82.5  | 47   | 43   | 26   | 47.5 | 62   |
| 12284 | 58   | 83   | 46   | 104   | 54.5 | 59   | 35   | 64   | 118  |
| 12285 | 33   | 19   | 18   | 73    | 29   | 32   | 11   | 18   | 24   |
| 12286 | 19   | 15   | 12   | 48    | 22   | 20   | 8.5  | 13   | 10   |
| 12287 | 26   | 17   | 18   | 79    | 30   | 20.5 | 10   | 19   | 12   |
| 12288 | 14   | 17   | 8    | 12    | 17   | 22   | 7    | 11   | 10   |
| 12289 | 27   | 17   | 16   | 55    | 30   | 23   | 11   | 20   | 15   |
| 12290 | 14.5 | 13   | 9    | 12    | 23.5 | 19   | 8    | 11   | 10   |
| 12291 | 23   | 15   | 16   | 83    | 24.5 | 18   | 8    | 15   | 11   |
| 12292 | 16   | 12   | 10   | 41.5  | 22   | 15   | 9    | 13   | 11   |
| 12293 | 12   | 12.5 | 7    | 12    | 20   | 13   | 8    | 11   | 9    |
| 12294 | 21   | 19   | 15   | 72    | 28   | 25.5 | 10   | 15   | 14   |
| 12295 | 22.5 | 16.5 | 16   | 50    | 36   | 21   | 10   | 17   | 16   |
| 12296 | 16   | 15   | 8    | 13    | 17.5 | 17   | 8    | 9    | 10   |
| 12297 | 17   | 15   | 9    | 12    | 18.5 | 20   | 9    | 11   | 9    |
| 12298 | 21   | 15   | 15   | 101   | 23.5 | 19   | 11   | 17   | 11   |
| 12299 | 18   | 17   | 13   | 54    | 27   | 22.5 | 10   | 15   | 11   |
| 12300 | 15   | 14   | 7    | 13    | 16   | 15   | 9    | 12   | 8    |
| 12301 | 20   | 16   | 17   | 50    | 28   | 22   | 11   | 12   | 15   |
| 12302 | 28   | 16   | 14   | 31    | 32   | 19   | 11   | 14   | 17   |
| 12303 | 18   | 14   | 12   | 38    | 27.5 | 20   | 8    | 12   | 12   |
| 12304 | 26   | 17   | 17   | 63    | 31   | 19   | 9    | 19   | 12   |
| 12305 | 27.5 | 15.5 | 13.5 | 61    | 34   | 22   | 10   | 15   | 40   |
| 12306 | 22   | 14   | 19   | 75    | 52.5 | 20   | 11   | 20   | 22.5 |
| 12307 | 34   | 25   | 36   | 51.5  | 177  | 33   | 21   | 52   | 24   |
| 12308 | 35   | 21.5 | 18   | 35    | 48   | 30   | 15   | 26.5 | 22   |
| 12309 | 38   | 18   | 22   | 108   | 45   | 25   | 14   | 32   | 118  |
| 12310 | 25   | 18   | 17   | 68    | 32.5 | 23   | 15.5 | 21   | 32   |
| 12311 | 89   | 25   | 32   | 152.5 | 657  | 31   | 40   | 97.5 | 69   |
| 12312 | 27   | 19   | 16   | 32    | 41   | 24   | 16   | 101  | 27   |



|       |       |      |      |       |      |      |      |      |       |
|-------|-------|------|------|-------|------|------|------|------|-------|
| 12313 | 22    | 14   | 23   | 27    | 35   | 18   | 13   | 14   | 69    |
| 12314 | 29    | 18   | 21   | 38    | 38   | 21   | 31   | 32   | 45    |
| 12315 | 52    | 19   | 20   | 50    | 41   | 31.5 | 18   | 27   | 19    |
| 12316 | 37.5  | 25   | 27   | 79    | 50   | 24   | 39   | 70   | 36    |
| 12317 | 26    | 17   | 17   | 27.5  | 40.5 | 22   | 14   | 16   | 17    |
| 12318 | 27    | 18   | 21   | 51    | 39   | 24.5 | 19.5 | 23   | 22    |
| 12319 | 18    | 15   | 15   | 50.5  | 27.5 | 20   | 8    | 13   | 19    |
| 12320 | 38    | 16   | 15   | 55    | 42   | 27   | 11   | 25   | 32    |
| 12321 | 47.5  | 20   | 18   | 45    | 81   | 25   | 18   | 76.5 | 13    |
| 12322 | 19    | 13   | 13   | 43    | 33   | 15   | 9    | 14   | 10    |
| 12323 | 19    | 15   | 17   | 50    | 32   | 19.5 | 10   | 20.5 | 16    |
| 12324 | 22    | 15   | 30   | 33    | 34   | 19   | 27.5 | 32   | 20    |
| 12325 | 99    | 18   | 20   | 42    | 37.5 | 29   | 20.5 | 111  | 64    |
| 12326 | 22    | 15   | 14   | 39    | 30   | 17   | 9    | 18   | 11.5  |
| 12327 | 27    | 17   | 25   | 79    | 381  | 27.5 | 16   | 23   | 17    |
| 12328 | 178.5 | 16   | 22   | 99    | 37.5 | 25   | 12.5 | 16   | 19    |
| 12329 | 18    | 15   | 14   | 108   | 30   | 18   | 15   | 14   | 13    |
| 12330 | 21    | 15   | 18   | 59    | 34   | 18   | 12   | 13   | 15    |
| 12331 | 28    | 17   | 20   | 140   | 42   | 24   | 27.5 | 19   | 54    |
| 12332 | 19    | 13   | 15   | 61.5  | 27   | 17   | 8    | 19   | 11    |
| 12333 | 57.5  | 22   | 29   | 66    | 65.5 | 27   | 23   | 43   | 25    |
| 12334 | 19    | 68.5 | 12   | 41    | 26.5 | 15   | 13   | 12   | 11    |
| 12335 | 41    | 19   | 23   | 107   | 43.5 | 23   | 15   | 32   | 53    |
| 12336 | 19    | 13   | 15   | 66    | 29.5 | 17   | 8    | 17   | 19    |
| 12337 | 36    | 17   | 21   | 105.5 | 30   | 21   | 32   | 27   | 15    |
| 12338 | 40.5  | 22   | 17   | 36    | 124  | 33   | 11   | 18   | 26    |
| 12339 | 24    | 16   | 17   | 96.5  | 69.5 | 24   | 26   | 23   | 19    |
| 12340 | 22    | 12   | 10.5 | 28    | 160  | 19   | 15   | 28   | 12    |
| 12341 | 24.5  | 15   | 17.5 | 23    | 34   | 21   | 10   | 27   | 19    |
| 12342 | 18    | 14   | 10   | 19    | 24.5 | 16   | 7    | 11   | 11    |
| 12343 | 31    | 16   | 12   | 29    | 28   | 23.5 | 14   | 28   | 12    |
| 12344 | 28    | 18   | 14   | 24    | 35.5 | 23   | 14.5 | 52   | 15    |
| 12345 | 24    | 21   | 16   | 72.5  | 40.5 | 18   | 13.5 | 85   | 33    |
| 12346 | 62    | 29   | 32   | 114   | 42   | 29   | 27   | 46.5 | 117   |
| 12347 | 40    | 28   | 28   | 63    | 63   | 35   | 19   | 30   | 24    |
| 12348 | 19    | 16   | 17   | 84    | 22.5 | 21.5 | 12   | 36   | 12    |
| 12349 | 119.5 | 51   | 31   | 105   | 40   | 45   | 24.5 | 46   | 84    |
| 12350 | 29    | 40   | 27   | 60    | 33   | 31   | 24   | 39   | 45    |
| 12351 | 39    | 61   | 38   | 77    | 44   | 41   | 33   | 55   | 222.5 |
| 12352 | 31    | 40   | 24   | 72    | 39   | 30   | 18   | 41   | 50    |
| 12353 | 29    | 38   | 23   | 69    | 53   | 28   | 17   | 34   | 40    |
| 12354 | 45    | 45   | 27   | 88.5  | 87   | 37.5 | 31   | 49   | 86    |
| 12355 | 47    | 60   | 40   | 161   | 46.5 | 42   | 31   | 55.5 | 79    |
| 12356 | 32.5  | 39   | 26   | 67.5  | 35   | 29   | 19   | 36.5 | 43    |
| 12357 | 103   | 59   | 33   | 77    | 43   | 51   | 29   | 51   | 73.5  |
| 12358 | 33    | 39   | 23   | 83    | 35   | 28   | 16   | 42   | 40    |
| 12359 | 37    | 59   | 34   | 78    | 40   | 44   | 28.5 | 52   | 56    |

|       |      |      |      |       |      |      |       |      |       |
|-------|------|------|------|-------|------|------|-------|------|-------|
| 12360 | 39   | 50   | 25   | 84    | 36   | 38   | 22    | 46.5 | 49    |
| 12361 | 33   | 43   | 25   | 79    | 30.5 | 28   | 29    | 38   | 61    |
| 12362 | 41   | 46   | 29   | 84    | 40.5 | 34   | 25    | 49   | 48    |
| 12363 | 33   | 47   | 28   | 65    | 33   | 34   | 24.5  | 46   | 46    |
| 12364 | 30   | 47   | 29   | 103   | 40   | 31.5 | 22    | 49.5 | 59    |
| 12365 | 49   | 75.5 | 38   | 95    | 50.5 | 48   | 31    | 65   | 72    |
| 12366 | 59   | 67   | 34   | 103.5 | 39   | 44   | 29    | 62   | 67    |
| 12367 | 33.5 | 39   | 28   | 79    | 35   | 33   | 20    | 37   | 41    |
| 12368 | 41   | 49   | 28   | 113   | 38   | 38.5 | 20    | 46   | 57    |
| 12369 | 28.5 | 38   | 22   | 64.5  | 33   | 29   | 17    | 35   | 37    |
| 12370 | 51   | 33   | 36   | 81    | 30   | 46   | 16    | 32   | 50    |
| 12371 | 44   | 54   | 35   | 102   | 45.5 | 40   | 25    | 72.5 | 50    |
| 12372 | 33   | 40   | 27   | 78.5  | 38.5 | 31   | 26    | 40   | 46    |
| 12373 | 33   | 39   | 34   | 71    | 35.5 | 32   | 18    | 44   | 53    |
| 12374 | 34   | 20   | 20   | 56    | 30.5 | 24   | 13    | 25   | 44    |
| 12375 | 32   | 40   | 26   | 61.5  | 31   | 27.5 | 20    | 41   | 55.5  |
| 12376 | 34   | 55   | 27.5 | 68    | 32   | 33.5 | 21    | 48   | 60    |
| 12377 | 54   | 76   | 41   | 104.5 | 49   | 57.5 | 38    | 65   | 106   |
| 12378 | 34   | 26.5 | 20   | 74    | 30   | 27   | 16    | 26.5 | 29    |
| 12379 | 59   | 67   | 36   | 79    | 39.5 | 51.5 | 26.5  | 59   | 74    |
| 12380 | 45   | 38   | 30   | 78    | 38   | 37.5 | 26    | 36   | 42    |
| 12381 | 68.5 | 60   | 29   | 65    | 37   | 54   | 38    | 45   | 67    |
| 12382 | 26   | 27.5 | 17   | 68    | 27   | 22   | 15    | 29   | 31    |
| 12383 | 34   | 36   | 24   | 70    | 34   | 31   | 18    | 34   | 51    |
| 12384 | 24   | 28   | 19   | 59    | 27   | 24   | 16    | 28   | 29    |
| 12385 | 34   | 46   | 29   | 93    | 36   | 31   | 21    | 43   | 53    |
| 12386 | 37   | 43   | 28   | 80    | 33.5 | 33   | 133.5 | 44   | 47    |
| 12387 | 39   | 45   | 34   | 97    | 44.5 | 32   | 25    | 41   | 43    |
| 12388 | 50.5 | 69   | 38   | 172.5 | 42   | 43.5 | 34    | 66   | 69.5  |
| 12389 | 27   | 33   | 22   | 61.5  | 30   | 25   | 16    | 28.5 | 67    |
| 12390 | 40   | 52   | 36   | 91    | 60.5 | 35   | 23    | 48   | 55.5  |
| 12391 | 33   | 43   | 26   | 69.5  | 33   | 33   | 21    | 40   | 41.5  |
| 12392 | 33   | 36   | 31   | 61    | 35   | 23   | 19    | 36   | 39    |
| 12393 | 36   | 43   | 31   | 76    | 35   | 34   | 22.5  | 45   | 53    |
| 12394 | 44   | 52   | 32   | 72    | 39   | 40   | 27    | 53   | 58    |
| 12395 | 67   | 55   | 32   | 99    | 42.5 | 37   | 28    | 53.5 | 103.5 |
| 12396 | 43   | 41   | 26   | 57    | 34.5 | 33   | 20.5  | 41   | 49    |
| 12397 | 55.5 | 66   | 40   | 92    | 44   | 47   | 35    | 61   | 74    |
| 12398 | 51.5 | 45.5 | 33   | 74    | 40.5 | 36   | 24    | 44   | 90    |
| 12399 | 165  | 56   | 33   | 66.5  | 35   | 45   | 27    | 54   | 54    |
| 12400 | 64.5 | 86.5 | 44   | 120.5 | 62   | 54   | 27    | 63   | 77    |
| 12401 | 68   | 83   | 50.5 | 140   | 61   | 61   | 35    | 73.5 | 110   |
| 12402 | 49   | 54   | 32   | 105.5 | 55   | 48   | 23    | 35   | 61    |
| 12403 | 55   | 53   | 37   | 106   | 62   | 53.5 | 25    | 40   | 74    |
| 12404 | 62   | 41   | 28   | 110.5 | 56   | 44   | 22    | 40   | 56    |
| 12405 | 53   | 41   | 35   | 122   | 51   | 48   | 19    | 56   | 60    |
| 12406 | 71.5 | 42   | 37   | 108.5 | 52   | 51   | 49    | 30   | 62    |

|       |      |      |      |       |      |      |      |      |      |
|-------|------|------|------|-------|------|------|------|------|------|
| 12407 | 74   | 58   | 39   | 129.5 | 59   | 57   | 26   | 42   | 94   |
| 12408 | 46   | 29.5 | 16   | 53    | 42   | 37   | 15   | 20   | 27.5 |
| 12409 | 79   | 32   | 18   | 68.5  | 48   | 40   | 12.5 | 17   | 34   |
| 12410 | 41   | 27.5 | 16   | 62    | 45   | 35   | 14   | 91   | 42   |
| 12411 | 33   | 28   | 18   | 64    | 43   | 37   | 10   | 23.5 | 26   |
| 12412 | 81   | 30   | 21   | 54    | 45   | 36   | 16   | 40   | 31   |
| 12413 | 53.5 | 39   | 54   | 119.5 | 50   | 41   | 21   | 29   | 77   |
| 12414 | 50   | 32.5 | 19   | 94.5  | 56.5 | 39.5 | 13   | 16   | 35   |
| 12415 | 34.5 | 25   | 17   | 70    | 41   | 35   | 12   | 14   | 24.5 |
| 12416 | 68.5 | 31   | 20   | 92    | 51.5 | 44   | 13   | 16   | 33   |
| 12417 | 46   | 26   | 17   | 72    | 52   | 32   | 11   | 15   | 23   |
| 12418 | 57   | 50.5 | 37   | 118.5 | 51.5 | 49   | 23   | 38   | 68   |
| 12419 | 56.5 | 53   | 39   | 100.5 | 52   | 47   | 25   | 41.5 | 57   |
| 12420 | 100  | 54   | 35   | 142   | 49   | 50.5 | 24   | 45   | 56   |
| 12421 | 56   | 42   | 30   | 119.5 | 51.5 | 44   | 22   | 42   | 56   |
| 12422 | 61   | 83   | 46   | 117   | 53.5 | 63   | 32   | 64   | 81   |
| 12423 | 48   | 52   | 28   | 96    | 44   | 46.5 | 19   | 35   | 58   |
| 12424 | 49   | 59   | 34   | 107   | 50.5 | 45.5 | 21   | 38   | 62   |
| 12425 | 58   | 82   | 39   | 104   | 56.5 | 58   | 33   | 59   | 97   |
| 12426 | 66   | 75   | 46   | 113   | 61   | 57   | 33   | 62   | 90   |
| 12427 | 43   | 40   | 25   | 101.5 | 56   | 40   | 15   | 31   | 57   |
| 12428 | 46   | 41   | 26   | 92    | 45   | 43.5 | 15   | 30.5 | 51   |
| 12429 | 51   | 56   | 32   | 152   | 52   | 48   | 25   | 43   | 69   |
| 12430 | 48   | 39   | 27   | 134   | 40.5 | 43   | 16   | 35   | 44.5 |
| 12431 | 61   | 58   | 35   | 103   | 53   | 50.5 | 27   | 45   | 55.5 |
| 12432 | 59   | 68   | 35   | 120.5 | 55   | 54   | 26   | 50.5 | 64   |
| 12433 | 30   | 17   | 21   | 83.5  | 31   | 22   | 26   | 19.5 | 19   |
| 12434 | 51   | 59   | 34   | 91    | 30   | 50   | 22   | 56   | 60.5 |
| 12435 | 63   | 78   | 41.5 | 126   | 59   | 59   | 37   | 68.5 | 81   |
| 12436 | 41.5 | 19   | 20.5 | 70.5  | 33.5 | 28.5 | 9    | 20   | 33   |
| 12437 | 28   | 16   | 19   | 106   | 23   | 22   | 11   | 23   | 59   |
| 12438 | 49   | 51   | 27   | 93.5  | 46   | 44   | 20   | 39.5 | 60   |
| 12439 | 20   | 15   | 9    | 49    | 16   | 20   | 7    | 12   | 10   |
| 12440 | 17   | 15   | 6    | 25    | 13   | 22   | 7    | 10   | 11   |
| 12441 | 51   | 53.5 | 29   | 123   | 50.5 | 47   | 21.5 | 44.5 | 62   |
| 12442 | 14   | 14   | 5    | 17    | 9    | 18   | 6    | 8.5  | 8    |
| 12443 | 65   | 48   | 25   | 118   | 47.5 | 43   | 18   | 35   | 56.5 |
| 12444 | 56   | 45   | 26   | 97    | 43   | 41   | 18   | 34   | 58   |
| 12445 | 52   | 48   | 25   | 101   | 38   | 52   | 17   | 28.5 | 49   |
| 12446 | 75.5 | 64   | 35   | 106   | 54   | 51   | 25   | 45   | 64   |
| 12447 | 57   | 53   | 32   | 95    | 47.5 | 49   | 22   | 34   | 57.5 |
| 12448 | 43   | 53   | 30.5 | 100   | 47   | 44   | 22   | 45   | 53   |
| 12449 | 57   | 63   | 36   | 98    | 48   | 56.5 | 27   | 48   | 73   |
| 12450 | 48   | 64   | 29   | 101   | 58   | 47.5 | 24.5 | 51   | 92   |
| 12451 | 83   | 80   | 43   | 146   | 62.5 | 62   | 39   | 58   | 78   |
| 12452 | 64   | 48   | 35   | 102   | 50   | 48.5 | 21   | 42.5 | 77   |
| 12453 | 61.5 | 92   | 32   | 120.5 | 49   | 55   | 24   | 53.5 | 69   |

|       |       |      |      |       |       |      |      |      |       |
|-------|-------|------|------|-------|-------|------|------|------|-------|
| 12454 | 43    | 43   | 30   | 93    | 51    | 41   | 15   | 30   | 58    |
| 12455 | 62    | 56   | 32   | 118   | 58.5  | 57   | 24   | 49   | 79    |
| 12456 | 49    | 49   | 32   | 93    | 47    | 46.5 | 18.5 | 35   | 81    |
| 12457 | 52    | 64   | 33   | 102   | 50    | 51   | 24   | 49   | 67    |
| 12458 | 45    | 26   | 22   | 105   | 36    | 32   | 13   | 17   | 26    |
| 12459 | 43    | 53   | 28   | 81    | 45    | 47.5 | 20   | 38   | 50    |
| 12460 | 42    | 27   | 25   | 109   | 39    | 35   | 13   | 22   | 62.5  |
| 12461 | 42    | 42   | 24   | 96.5  | 46    | 38   | 18   | 31   | 53    |
| 12462 | 46    | 56   | 31   | 92    | 45    | 43   | 24   | 39   | 53    |
| 12463 | 51.5  | 73   | 35   | 119   | 49    | 52   | 26   | 59   | 83    |
| 12464 | 50.5  | 31.5 | 47   | 114   | 46    | 32   | 12   | 18   | 22    |
| 12465 | 46    | 45   | 28   | 105   | 45    | 42.5 | 19   | 32.5 | 48.5  |
| 12466 | 53    | 52.5 | 29   | 131   | 46.5  | 47   | 21   | 37   | 55    |
| 12467 | 34    | 23   | 17   | 118   | 33    | 29   | 9    | 16   | 35    |
| 12468 | 36    | 25   | 19   | 92    | 40    | 31   | 10   | 14   | 57    |
| 12469 | 31    | 25   | 14   | 62    | 38    | 29.5 | 10   | 13   | 22    |
| 12470 | 36.5  | 25   | 15   | 78    | 38    | 27   | 9    | 14   | 50    |
| 12471 | 44    | 26   | 25   | 127   | 42    | 33   | 28   | 24   | 30    |
| 12472 | 36    | 30.5 | 21   | 77    | 39    | 33   | 11   | 17   | 82    |
| 12473 | 39    | 28.5 | 24   | 109   | 40.5  | 32   | 21   | 24   | 34    |
| 12474 | 49    | 26   | 15   | 53    | 45    | 43   | 11   | 48   | 27    |
| 12475 | 51    | 23   | 17   | 66.5  | 55    | 34   | 14   | 21   | 35    |
| 12476 | 164   | 32   | 23.5 | 101   | 45    | 87   | 20   | 27   | 69    |
| 12477 | 102   | 26   | 22   | 57    | 40.5  | 30   | 18   | 61.5 | 83    |
| 12478 | 38    | 28   | 18   | 61    | 36.5  | 27.5 | 10   | 16   | 55    |
| 12479 | 31    | 22.5 | 13   | 53    | 39    | 27   | 8    | 11   | 19    |
| 12480 | 65    | 26   | 15   | 50.5  | 46.5  | 39.5 | 11   | 41   | 22    |
| 12481 | 60    | 29   | 23   | 89    | 44.5  | 35   | 24.5 | 46   | 29    |
| 12482 | 70    | 41   | 26   | 98    | 292   | 56   | 17   | 24   | 42    |
| 12483 | 52.5  | 38   | 33   | 140   | 66.5  | 46.5 | 17   | 32   | 43    |
| 12484 | 51    | 37   | 42   | 117   | 61    | 45   | 13   | 26   | 36    |
| 12485 | 50    | 32   | 24   | 74    | 78    | 39   | 23   | 16   | 30    |
| 12486 | 48    | 38   | 26   | 91    | 64    | 46.5 | 19   | 23   | 44.5  |
| 12487 | 112.5 | 83.5 | 58   | 175   | 552.5 | 70   | 74.5 | 126  | 75.5  |
| 12488 | 145   | 63   | 75   | 197   | 162.5 | 67   | 105  | 88.5 | 95    |
| 12489 | 151.5 | 66   | 67   | 222.5 | 127.5 | 83   | 212  | 85   | 97    |
| 12490 | 77    | 46   | 43   | 149   | 384   | 54   | 59   | 82.5 | 108.5 |
| 12491 | 38    | 33   | 18   | 61    | 48    | 41   | 13   | 17   | 28    |
| 12492 | 60    | 36   | 25   | 102   | 66    | 42   | 22   | 26.5 | 65    |
| 12493 | 53.5  | 37   | 43   | 127   | 55    | 51   | 19   | 107  | 77    |
| 12494 | 195   | 53   | 22   | 113   | 49    | 163  | 18   | 17   | 136   |
| 12495 | 32    | 29   | 17   | 52    | 43    | 34   | 11   | 13   | 26    |
| 12496 | 39    | 34   | 17   | 57    | 50    | 45   | 12   | 11   | 29    |
| 12497 | 76    | 90   | 50   | 123   | 74    | 70.5 | 35   | 62   | 100   |
| 12498 | 63    | 67   | 37   | 124   | 87    | 62   | 27   | 44   | 66    |
| 12499 | 98    | 65   | 35   | 107   | 67    | 70.5 | 23   | 43   | 61    |
| 12500 | 69    | 57   | 40   | 121   | 62    | 56   | 23   | 44   | 88    |

|       |       |      |      |       |      |      |      |      |      |
|-------|-------|------|------|-------|------|------|------|------|------|
| 12501 | 67    | 79   | 38   | 115   | 59   | 64   | 27   | 47   | 92   |
| 12502 | 57    | 53   | 30   | 119.5 | 58   | 55   | 19   | 41   | 58.5 |
| 12503 | 67    | 70   | 40   | 138   | 58   | 56   | 26   | 52   | 84   |
| 12504 | 68    | 93   | 42   | 130   | 72   | 75   | 35   | 58   | 89   |
| 12505 | 84.5  | 65   | 48   | 109   | 59   | 60.5 | 27   | 47   | 93   |
| 12506 | 61.5  | 57   | 34.5 | 116   | 56   | 56   | 21   | 43.5 | 61   |
| 12507 | 61    | 55   | 35   | 121   | 54   | 61.5 | 23   | 50   | 61.5 |
| 12508 | 71    | 77   | 41.5 | 154   | 58.5 | 67   | 33   | 61   | 91.5 |
| 12509 | 71    | 82   | 44   | 162   | 65   | 69   | 30   | 62   | 79   |
| 12510 | 52    | 44   | 31   | 101.5 | 47.5 | 49   | 16   | 29   | 63   |
| 12511 | 85    | 71   | 37   | 104   | 55   | 61   | 26   | 51   | 76.5 |
| 12512 | 59    | 70   | 37   | 126   | 53   | 59.5 | 24   | 54   | 84   |
| 12513 | 59.5  | 66   | 60   | 114   | 59   | 59   | 22   | 42   | 71   |
| 12514 | 79    | 80   | 40.5 | 122   | 56.5 | 62   | 28   | 57   | 83.5 |
| 12515 | 73    | 72.5 | 66   | 142   | 67   | 66   | 27   | 64   | 152  |
| 12516 | 66    | 86   | 42   | 134   | 71   | 67   | 31   | 60   | 88   |
| 12517 | 92    | 54   | 27   | 104   | 50   | 76   | 33   | 30   | 50   |
| 12518 | 63.5  | 67   | 35   | 142   | 57   | 58   | 25.5 | 47   | 70   |
| 12519 | 72.5  | 97   | 51   | 148   | 64   | 70.5 | 39   | 77   | 101  |
| 12520 | 65.5  | 69   | 39   | 122   | 59   | 61   | 30   | 58   | 93   |
| 12521 | 67    | 50   | 30   | 108   | 53   | 56   | 19   | 39   | 59   |
| 12522 | 81    | 74   | 38   | 126   | 56   | 60.5 | 29   | 53   | 110  |
| 12523 | 56    | 53   | 32   | 124   | 67   | 49   | 23   | 37   | 62   |
| 12524 | 69    | 88   | 58   | 131   | 61   | 66   | 30   | 61   | 96   |
| 12525 | 129.5 | 61   | 39   | 127   | 61   | 55.5 | 27   | 54.5 | 83   |
| 12526 | 61    | 47   | 37   | 141   | 54   | 53   | 20   | 39.5 | 51   |
| 12527 | 52    | 45   | 33   | 95    | 51   | 44   | 16   | 33   | 73   |
| 12528 | 61    | 70.5 | 38.5 | 121   | 60   | 56   | 28   | 53   | 70   |
| 12529 | 65.5  | 47.5 | 60   | 125   | 115  | 47   | 70.5 | 39.5 | 52   |
| 12530 | 71    | 50   | 31   | 109   | 56.5 | 49   | 26   | 37   | 64   |
| 12531 | 51    | 34.5 | 25   | 92    | 62.5 | 35   | 16   | 27   | 47   |
| 12532 | 54    | 58   | 28   | 112   | 50   | 54   | 20   | 47.5 | 58   |
| 12533 | 56    | 74   | 34   | 116   | 57   | 58   | 26   | 54   | 77   |
| 12534 | 64    | 54   | 32   | 124   | 52   | 56   | 33   | 34   | 55   |
| 12535 | 70.5  | 45   | 27   | 107   | 46   | 63.5 | 15   | 35   | 50   |
| 12536 | 54    | 54   | 31   | 101   | 58.5 | 48   | 24   | 41   | 59   |
| 12537 | 52    | 51   | 29   | 110   | 44   | 49   | 22   | 38   | 61.5 |
| 12538 | 57    | 48   | 38   | 97.5  | 56   | 46   | 106  | 41   | 55   |
| 12539 | 69    | 51   | 29   | 98.5  | 44   | 62   | 20   | 34   | 73   |
| 12540 | 62    | 63   | 41.5 | 116.5 | 57   | 51.5 | 26   | 48   | 121  |
| 12541 | 43    | 30   | 22   | 80.5  | 41   | 39.5 | 12   | 21   | 48.5 |
| 12542 | 60    | 50   | 36.5 | 104   | 57   | 46   | 25   | 43   | 106  |
| 12543 | 49    | 57   | 34   | 108   | 58   | 51   | 24   | 41   | 66   |
| 12544 | 49    | 47   | 30   | 91    | 46   | 44.5 | 20   | 39   | 68.5 |
| 12545 | 77    | 51   | 31   | 124   | 54   | 64.5 | 23   | 39   | 61   |
| 12546 | 104.5 | 48   | 30   | 114   | 48.5 | 43   | 37   | 48   | 69   |
| 12547 | 99.5  | 87   | 50   | 129.5 | 60   | 76.5 | 34   | 62   | 84   |

|       |       |      |      |       |      |       |      |      |      |
|-------|-------|------|------|-------|------|-------|------|------|------|
| 12548 | 163   | 100  | 42   | 135   | 67   | 68    | 35   | 93   | 105  |
| 12549 | 60    | 93   | 48   | 124.5 | 53   | 60    | 30.5 | 74   | 92   |
| 12550 | 36    | 24   | 12.5 | 63.5  | 36   | 32    | 11   | 12   | 27   |
| 12551 | 32    | 25   | 19   | 51    | 33   | 32.5  | 10   | 13   | 23   |
| 12552 | 56    | 29   | 21   | 141   | 43.5 | 37    | 13   | 25   | 41   |
| 12553 | 60.5  | 32   | 16.5 | 58    | 44.5 | 59.5  | 10   | 19   | 32   |
| 12554 | 103   | 44   | 37   | 93    | 58   | 66    | 31   | 47   | 45   |
| 12555 | 41    | 29   | 18   | 66    | 42.5 | 33    | 11   | 22   | 30   |
| 12556 | 38.5  | 25   | 15   | 58    | 37   | 32.5  | 10   | 14   | 28   |
| 12557 | 42    | 27   | 13   | 64    | 39   | 35    | 13   | 30   | 23   |
| 12558 | 43.5  | 27   | 26   | 105   | 42   | 31.5  | 13   | 21   | 33.5 |
| 12559 | 42    | 23.5 | 14   | 53    | 39.5 | 30.5  | 13   | 14   | 25   |
| 12560 | 31.5  | 25   | 13   | 45    | 37   | 30    | 9    | 10   | 20   |
| 12561 | 45    | 23   | 16   | 58    | 40   | 34    | 10   | 16   | 22   |
| 12562 | 54    | 25   | 18   | 67    | 47.5 | 35    | 15   | 24   | 27   |
| 12563 | 42    | 25   | 14   | 61    | 36   | 36    | 9    | 13   | 20   |
| 12564 | 54    | 29   | 23   | 139.5 | 51   | 39    | 12   | 46   | 36   |
| 12565 | 33    | 22.5 | 15   | 72    | 37   | 32    | 11   | 13   | 22   |
| 12566 | 38    | 27   | 14   | 76    | 41   | 34    | 12   | 27   | 23   |
| 12567 | 33    | 24   | 14   | 51    | 39.5 | 33    | 9.5  | 15   | 23   |
| 12568 | 41    | 25   | 18   | 64.5  | 39   | 36    | 14   | 76   | 23   |
| 12569 | 71    | 36   | 19   | 76    | 51   | 50    | 18   | 138  | 54   |
| 12570 | 76.5  | 31   | 19   | 95.5  | 60.5 | 39    | 16   | 56   | 25   |
| 12571 | 46.5  | 25   | 17   | 56    | 64   | 33    | 38   | 34   | 26   |
| 12572 | 76.5  | 40   | 47.5 | 66    | 49.5 | 46    | 51   | 100  | 37   |
| 12573 | 42    | 30   | 26   | 109   | 91   | 38.5  | 16.5 | 31   | 94   |
| 12574 | 217.5 | 29.5 | 26   | 105   | 68   | 39    | 20   | 107  | 39.5 |
| 12575 | 42    | 25.5 | 20   | 83    | 52.5 | 35    | 16   | 29   | 64   |
| 12576 | 31    | 23   | 12   | 39    | 31   | 30.5  | 9    | 12   | 19   |
| 12577 | 34    | 23   | 10   | 41    | 32   | 34    | 9    | 11   | 20   |
| 12578 | 36    | 25   | 16   | 71    | 35   | 34    | 11   | 16   | 22   |
| 12579 | 34.5  | 23   | 11   | 37    | 27   | 31    | 9    | 13   | 19   |
| 12580 | 33    | 25   | 15   | 85    | 36   | 37    | 7.5  | 16.5 | 23   |
| 12581 | 30    | 22   | 10   | 45    | 33   | 30    | 9    | 11   | 19   |
| 12582 | 32    | 20   | 13   | 85    | 34   | 29    | 10   | 17   | 18.5 |
| 12583 | 37    | 24   | 15   | 86.5  | 38   | 31.5  | 11   | 20   | 22   |
| 12584 | 55    | 25   | 15   | 61    | 37   | 35.5  | 13   | 14   | 25.5 |
| 12585 | 33    | 25   | 13   | 58    | 38   | 32    | 9    | 12   | 20.5 |
| 12586 | 45    | 26   | 27   | 87    | 42   | 31    | 14   | 25   | 27   |
| 12587 | 57    | 27   | 17   | 80    | 42   | 36    | 16.5 | 34   | 28   |
| 12588 | 640.5 | 130  | 33.5 | 69    | 49   | 645.5 | 15   | 38   | 170  |
| 12589 | 45    | 26   | 21   | 76    | 46   | 30    | 15.5 | 63   | 65   |
| 12590 | 103   | 22   | 16   | 103   | 43   | 31    | 11   | 19   | 23   |
| 12591 | 65.5  | 24   | 19   | 91    | 57.5 | 34    | 14   | 29   | 32   |
| 12592 | 32    | 24   | 12   | 50.5  | 34   | 29    | 8    | 12   | 22   |
| 12593 | 47    | 22   | 13   | 63    | 37   | 30    | 10   | 16   | 22   |
| 12594 | 39    | 25   | 14   | 71.5  | 37.5 | 31    | 11   | 50.5 | 30   |

|       |       |       |      |       |       |      |      |       |      |
|-------|-------|-------|------|-------|-------|------|------|-------|------|
| 12595 | 32.5  | 22    | 16   | 84    | 34    | 31   | 10   | 14    | 19   |
| 12596 | 57.5  | 87.5  | 64   | 176   | 47.5  | 65.5 | 19   | 360   | 24   |
| 12597 | 31    | 23    | 12   | 58    | 41    | 29.5 | 14   | 13    | 18   |
| 12598 | 43    | 25    | 17   | 90    | 54.5  | 37   | 14.5 | 26.5  | 32   |
| 12599 | 39    | 26    | 17   | 59    | 51    | 30   | 14   | 63    | 24   |
| 12600 | 55    | 25    | 35   | 49.5  | 59    | 36   | 28   | 22    | 26   |
| 12601 | 33    | 25    | 14   | 61.5  | 34    | 31.5 | 10   | 13    | 23   |
| 12602 | 66    | 30    | 25   | 71    | 54    | 41   | 37   | 27    | 30   |
| 12603 | 41    | 24    | 17.5 | 48    | 48    | 30   | 12.5 | 17    | 21   |
| 12604 | 43    | 25    | 20   | 115   | 38.5  | 36   | 10.5 | 20    | 33   |
| 12605 | 39    | 26    | 15   | 66    | 47    | 35   | 11   | 19    | 82   |
| 12606 | 47    | 28    | 20   | 68    | 59    | 32   | 14.5 | 106.5 | 89   |
| 12607 | 46    | 30    | 22.5 | 184   | 118.5 | 37.5 | 14   | 44    | 96   |
| 12608 | 60.5  | 25    | 20   | 77    | 117   | 35   | 12   | 31    | 22.5 |
| 12609 | 49    | 32    | 26   | 140   | 36    | 39   | 14   | 75    | 26   |
| 12610 | 58    | 38    | 22   | 95    | 38.5  | 53   | 16   | 26    | 41   |
| 12611 | 60    | 54    | 29   | 107   | 52.5  | 54   | 20.5 | 46    | 60.5 |
| 12612 | 85    | 68    | 34   | 122   | 52    | 54   | 26   | 57    | 86   |
| 12613 | 40    | 35    | 20   | 81.5  | 43    | 35   | 15   | 27    | 45   |
| 12614 | 50    | 58    | 32.5 | 105   | 54    | 47   | 26.5 | 51    | 64   |
| 12615 | 52    | 58    | 29   | 117   | 55    | 44   | 25   | 44.5  | 58   |
| 12616 | 69.5  | 74    | 41   | 118   | 47    | 57   | 30   | 59    | 82   |
| 12617 | 63    | 92.5  | 40.5 | 143   | 59    | 65   | 31   | 73    | 103  |
| 12618 | 61    | 83.5  | 44   | 124.5 | 53    | 63.5 | 31   | 62    | 100  |
| 12619 | 43.5  | 56.5  | 26   | 111   | 46    | 44   | 22   | 44    | 62   |
| 12620 | 54    | 65.5  | 34   | 102   | 56    | 52   | 28   | 53.5  | 82   |
| 12621 | 51    | 56    | 33   | 123   | 47    | 43.5 | 22   | 44    | 58   |
| 12622 | 60    | 63    | 30   | 91    | 49    | 49   | 24   | 49    | 75   |
| 12623 | 44    | 45.5  | 26   | 101   | 42    | 40.5 | 18   | 35    | 51   |
| 12624 | 60    | 55    | 31   | 97    | 55    | 47   | 23.5 | 56    | 71.5 |
| 12625 | 42    | 40    | 28   | 100   | 46    | 37   | 15   | 28    | 37.5 |
| 12626 | 81    | 54    | 30   | 119   | 57    | 44.5 | 31   | 46.5  | 55   |
| 12627 | 56    | 54    | 31   | 107   | 48    | 49   | 22   | 41    | 60   |
| 12628 | 48    | 41    | 24   | 101   | 45.5  | 42.5 | 17   | 30    | 46   |
| 12629 | 39    | 38    | 22   | 84    | 39    | 36   | 14   | 25    | 45   |
| 12630 | 47    | 49    | 26   | 89    | 44    | 45   | 18   | 36    | 65   |
| 12631 | 53    | 54    | 31.5 | 137   | 51    | 48   | 22   | 60    | 74   |
| 12632 | 54    | 63.5  | 38.5 | 109   | 48.5  | 48.5 | 23   | 44    | 67   |
| 12633 | 45    | 39    | 24.5 | 106   | 42    | 38   | 18.5 | 29    | 57   |
| 12634 | 60.5  | 53    | 31   | 98    | 43    | 46   | 22   | 45    | 58   |
| 12635 | 50    | 46    | 23   | 97    | 44    | 44   | 19   | 34    | 46   |
| 12636 | 42.5  | 35    | 20   | 92    | 43    | 34   | 14   | 28    | 52   |
| 12637 | 49    | 46    | 24   | 96    | 42    | 41   | 18   | 35    | 45   |
| 12638 | 137   | 68.5  | 34   | 118   | 46    | 60.5 | 24   | 51    | 60   |
| 12639 | 59.5  | 52    | 24   | 95    | 47.5  | 59.5 | 20   | 34    | 52   |
| 12640 | 271.5 | 100.5 | 43   | 136   | 51    | 122  | 28   | 60.5  | 86   |
| 12641 | 52.5  | 56    | 31   | 103   | 47.5  | 46   | 22   | 44    | 73   |

|       |       |       |      |       |      |       |      |      |       |
|-------|-------|-------|------|-------|------|-------|------|------|-------|
| 12642 | 62.5  | 55    | 33   | 125   | 58.5 | 50    | 26   | 54.5 | 59    |
| 12643 | 69    | 143   | 43   | 114.5 | 73.5 | 68    | 28.5 | 54   | 84    |
| 12644 | 49    | 41    | 33   | 139   | 47   | 37.5  | 19   | 30   | 57    |
| 12645 | 68    | 72.5  | 37   | 122   | 59   | 68.5  | 23   | 47   | 73    |
| 12646 | 65    | 61    | 36   | 135   | 55   | 58    | 20   | 44   | 78    |
| 12647 | 87.5  | 110   | 69   | 158   | 67   | 91.5  | 40   | 76   | 121   |
| 12648 | 87    | 88    | 42.5 | 185   | 69.5 | 90    | 31   | 58.5 | 94    |
| 12649 | 63    | 70    | 38   | 138.5 | 54   | 62    | 26   | 46.5 | 72    |
| 12650 | 71    | 71    | 60   | 161.5 | 55   | 66.5  | 25   | 43   | 76.5  |
| 12651 | 65.5  | 76.5  | 39   | 150.5 | 48   | 71    | 29   | 57.5 | 94    |
| 12652 | 80    | 91    | 49   | 145   | 67   | 78    | 33   | 62   | 103   |
| 12653 | 56    | 58    | 34   | 202   | 45   | 62    | 19.5 | 39   | 58    |
| 12654 | 66.5  | 66    | 33   | 151   | 53   | 62    | 30   | 42   | 61    |
| 12655 | 72.5  | 104.5 | 64   | 156   | 73   | 84    | 41   | 77   | 119   |
| 12656 | 56    | 47    | 28   | 169   | 55   | 55    | 16   | 35   | 53    |
| 12657 | 56.5  | 45    | 31   | 206   | 53   | 51    | 17   | 30.5 | 50    |
| 12658 | 67.5  | 82    | 40   | 127   | 56.5 | 61    | 30   | 58   | 74    |
| 12659 | 70    | 97.5  | 46   | 158.5 | 60   | 80    | 37   | 62.5 | 97    |
| 12660 | 49    | 40    | 22   | 108   | 40   | 46.5  | 14   | 19   | 43    |
| 12661 | 78    | 54    | 40   | 155.5 | 52.5 | 57    | 24   | 39   | 71    |
| 12662 | 58    | 67    | 34   | 177   | 57   | 61    | 22   | 45   | 65    |
| 12663 | 41    | 33    | 23   | 101   | 40   | 44    | 11   | 14.5 | 42    |
| 12664 | 70    | 69.5  | 40   | 160   | 57   | 66    | 25.5 | 52   | 76    |
| 12665 | 57    | 68    | 36.5 | 123.5 | 48.5 | 66.5  | 24   | 40   | 81    |
| 12666 | 57    | 35    | 18.5 | 105.5 | 51   | 47    | 22   | 17   | 33    |
| 12667 | 244   | 137   | 26   | 96    | 48.5 | 239.5 | 13   | 15   | 96    |
| 12668 | 40    | 32.5  | 19   | 75    | 49   | 45    | 10   | 14   | 25    |
| 12669 | 44    | 39    | 20   | 109   | 46   | 45    | 17.5 | 13   | 29    |
| 12670 | 53    | 41    | 20   | 74    | 45   | 46.5  | 13   | 21   | 31    |
| 12671 | 43    | 32    | 17   | 70    | 37   | 40.5  | 10   | 16   | 28    |
| 12672 | 234.5 | 105   | 60   | 227.5 | 87   | 97    | 80.5 | 294  | 153.5 |
| 12673 | 76    | 40    | 20   | 101   | 46   | 53.5  | 17   | 32   | 35    |
| 12674 | 44    | 28    | 19   | 97    | 52   | 35    | 11   | 21   | 27    |
| 12675 | 56    | 40.5  | 25   | 88    | 44   | 57    | 15   | 18   | 37    |
| 12676 | 42    | 32    | 21   | 87    | 47   | 46    | 11   | 19   | 38    |
| 12677 | 57    | 34    | 19   | 111   | 38   | 47    | 10   | 16   | 31    |
| 12678 | 43    | 34    | 23   | 70    | 42   | 45    | 12   | 13   | 28    |
| 12679 | 51    | 33    | 20   | 95.5  | 45   | 41    | 14   | 19   | 27    |
| 12680 | 34    | 30    | 17   | 49    | 42   | 38    | 9.5  | 12   | 26    |
| 12681 | 40    | 31    | 15   | 69    | 44   | 42.5  | 10   | 13   | 27    |
| 12682 | 61    | 37    | 21   | 124   | 44   | 53    | 38.5 | 30   | 32    |
| 12683 | 42.5  | 34    | 19   | 70    | 43   | 43    | 13   | 16   | 29    |
| 12684 | 76    | 35    | 31   | 72    | 59   | 47    | 18   | 53   | 36    |
| 12685 | 51    | 24    | 16   | 69    | 41   | 32    | 22   | 92   | 26    |
| 12686 | 411.5 | 67.5  | 22   | 122   | 64   | 371   | 23.5 | 22.5 | 115   |
| 12687 | 61    | 47    | 27   | 97    | 40   | 48    | 19   | 35   | 39    |
| 12688 | 46    | 32    | 25   | 142   | 62   | 42    | 15   | 26   | 30    |



|       |      |      |      |       |      |      |      |      |      |
|-------|------|------|------|-------|------|------|------|------|------|
| 12689 | 41   | 30.5 | 20   | 108.5 | 46   | 43.5 | 11   | 18   | 33   |
| 12690 | 50   | 31   | 23   | 120   | 39   | 42   | 14   | 19   | 31   |
| 12691 | 61   | 32   | 26   | 154   | 39   | 46   | 12   | 33   | 40   |
| 12692 | 52.5 | 34   | 26   | 168   | 49   | 51   | 17   | 46   | 57   |
| 12693 | 54.5 | 31   | 29   | 111   | 44   | 44   | 13   | 27   | 66   |
| 12694 | 50   | 29   | 23   | 131   | 40   | 43   | 37   | 23   | 41   |
| 12695 | 49   | 32   | 24   | 110   | 38   | 44   | 12   | 21   | 70   |
| 12696 | 51   | 27   | 27   | 144   | 48   | 36   | 14   | 27.5 | 36   |
| 12697 | 45   | 33   | 33   | 120   | 44.5 | 45   | 12   | 24   | 54   |
| 12698 | 40   | 32   | 18   | 70    | 37   | 40   | 9    | 15   | 43   |
| 12699 | 61   | 61   | 34   | 97    | 53.5 | 60   | 22   | 44   | 70   |
| 12700 | 36.5 | 33   | 22   | 100   | 39   | 40   | 11   | 14   | 43.5 |
| 12701 | 57   | 35   | 20   | 90    | 45   | 42   | 13   | 21   | 41   |
| 12702 | 39   | 31   | 18   | 85    | 37   | 40   | 10   | 16   | 29   |
| 12703 | 40   | 32   | 19   | 116.5 | 48   | 42   | 10   | 16   | 41   |
| 12704 | 47   | 33.5 | 26   | 156   | 45   | 42   | 13   | 25   | 40   |
| 12705 | 41   | 32   | 31.5 | 131   | 53   | 40   | 12   | 29.5 | 40   |
| 12706 | 47.5 | 32   | 24   | 120   | 42   | 43   | 43   | 26   | 43   |
| 12707 | 61   | 33   | 31   | 90    | 59   | 46   | 19   | 20   | 54   |
| 12708 | 43.5 | 34.5 | 19.5 | 123   | 44   | 42   | 18   | 38.5 | 35   |
| 12709 | 50.5 | 39   | 22   | 131   | 48   | 51   | 12   | 46   | 57   |
| 12710 | 55   | 36   | 44   | 192.5 | 85.5 | 47   | 49   | 32   | 29   |
| 12711 | 39   | 30   | 18   | 86    | 39   | 42.5 | 11   | 15   | 24   |
| 12712 | 57   | 43   | 25   | 121   | 44   | 51   | 13   | 18.5 | 32   |
| 12713 | 70.5 | 63.5 | 34   | 96.5  | 50   | 68   | 23   | 36   | 60   |
| 12714 | 67   | 77.5 | 37.5 | 114   | 63   | 71   | 26   | 48   | 85   |
| 12715 | 73.5 | 65.5 | 42   | 107   | 57   | 67   | 27   | 50   | 67   |
| 12716 | 61.5 | 60   | 42   | 110.5 | 58.5 | 55   | 24   | 44   | 94   |
| 12717 | 78   | 103  | 69   | 152   | 79.5 | 87   | 43   | 78   | 107  |
| 12718 | 75   | 83   | 47   | 119   | 65   | 66   | 33   | 62   | 80   |
| 12719 | 67.5 | 76   | 45   | 136   | 58.5 | 71   | 27   | 53   | 78   |
| 12720 | 81   | 79   | 46.5 | 108   | 60.5 | 79.5 | 27.5 | 60   | 83   |
| 12721 | 63   | 84   | 49   | 118   | 75   | 66   | 31   | 56   | 76   |
| 12722 | 84   | 81   | 53   | 135   | 79   | 79   | 30   | 54.5 | 83   |
| 12723 | 62.5 | 61   | 36   | 121   | 57   | 62   | 23   | 43   | 77   |
| 12724 | 104  | 55   | 30.5 | 112   | 51   | 108  | 18   | 24.5 | 65   |
| 12725 | 47   | 45   | 26   | 84    | 46.5 | 48.5 | 14   | 25.5 | 57.5 |
| 12726 | 67   | 84   | 47   | 130   | 67   | 70   | 31.5 | 68   | 82.5 |
| 12727 | 51   | 42   | 26   | 89    | 48.5 | 46   | 17.5 | 27   | 61   |
| 12728 | 72   | 82   | 43.5 | 121   | 59   | 73   | 33   | 60   | 80   |
| 12729 | 59   | 53   | 34.5 | 105   | 53   | 54.5 | 31   | 40.5 | 53.5 |
| 12730 | 497  | 53   | 38   | 120.5 | 70.5 | 51   | 23   | 47   | 65.5 |
| 12731 | 60   | 63   | 40   | 133   | 53   | 53.5 | 29.5 | 53   | 98.5 |
| 12732 | 77.5 | 90   | 41   | 138   | 54   | 69   | 29   | 57   | 93.5 |
| 12733 | 70   | 67   | 39   | 118   | 63   | 61   | 31   | 48   | 74   |
| 12734 | 76   | 77.5 | 56   | 132   | 54   | 81   | 28   | 52   | 79   |
| 12735 | 52   | 58   | 32.5 | 109   | 51   | 49   | 23   | 43   | 67.5 |

|       |      |      |      |       |       |      |    |      |       |
|-------|------|------|------|-------|-------|------|----|------|-------|
| 12736 | 64.5 | 65   | 33   | 98    | 49    | 64   | 27 | 48   | 75    |
| 12737 | 49   | 31   | 25.5 | 92    | 46    | 39   | 12 | 26   | 61    |
| 12738 | 56   | 49   | 29   | 94    | 44    | 48.5 | 18 | 38   | 50    |
| 12739 | 63   | 67   | 34   | 118   | 55    | 55   | 24 | 50   | 63    |
| 12740 | 57.5 | 45   | 27   | 103   | 49    | 45   | 20 | 36   | 46    |
| 12741 | 61   | 42   | 26   | 93    | 51    | 44   | 17 | 26   | 66    |
| 12742 | 56.5 | 70   | 37   | 122   | 55    | 52   | 25 | 50   | 85.5  |
| 12743 | 55   | 59   | 33   | 115   | 45    | 53   | 24 | 44   | 133.5 |
| 12744 | 73   | 63   | 30   | 111   | 47    | 54   | 22 | 45   | 63    |
| 12745 | 67   | 82   | 38   | 127   | 56.5  | 57.5 | 27 | 59   | 103   |
| 12746 | 65.5 | 73   | 53   | 114.5 | 59    | 61   | 29 | 58   | 86    |
| 12747 | 72.5 | 82   | 40   | 124   | 57    | 63.5 | 28 | 63   | 97    |
| 12748 | 56   | 52   | 32   | 108.5 | 50.5  | 52   | 19 | 38   | 51    |
| 12749 | 85   | 67   | 41   | 135   | 53    | 51   | 27 | 56.5 | 78    |
| 12750 | 52   | 67   | 37   | 112   | 51    | 51   | 29 | 65   | 73    |
| 12751 | 73   | 94   | 47   | 142   | 60    | 63   | 37 | 71   | 101   |
| 12752 | 49   | 29   | 20   | 84    | 39.5  | 35   | 10 | 19   | 32    |
| 12753 | 50.5 | 45   | 27   | 110   | 65    | 45.5 | 18 | 33   | 49    |
| 12754 | 45   | 26   | 20   | 79    | 42    | 33   | 10 | 12   | 22    |
| 12755 | 51   | 26   | 22   | 102   | 38    | 31.5 | 11 | 19   | 39    |
| 12756 | 34   | 22   | 19   | 67    | 31    | 30   | 9  | 11   | 20    |
| 12757 | 39   | 32   | 22   | 80    | 45    | 37   | 11 | 19   | 56    |
| 12758 | 56   | 27   | 24   | 114   | 66.5  | 36   | 28 | 20   | 31    |
| 12759 | 38   | 28   | 17   | 87    | 42.5  | 30   | 13 | 13   | 24    |
| 12760 | 36   | 21.5 | 18   | 60.5  | 379.5 | 30   | 11 | 20.5 | 25    |
| 12761 | 62.5 | 37   | 36   | 127.5 | 56    | 44.5 | 24 | 62   | 56.5  |
| 12762 | 31   | 24   | 20   | 57    | 42    | 33   | 8  | 24   | 42    |
| 12763 | 38   | 23   | 13   | 66    | 35    | 29.5 | 8  | 12.5 | 21    |
| 12764 | 38.5 | 25   | 26   | 114   | 45.5  | 33   | 14 | 17   | 33    |
| 12765 | 88   | 29.5 | 22   | 86    | 44.5  | 34   | 32 | 17   | 46    |
| 12766 | 34   | 24   | 14.5 | 43    | 35    | 32.5 | 8  | 11   | 28    |
| 12767 | 46.5 | 24   | 12.5 | 45    | 40    | 29   | 8  | 9    | 22    |
| 12768 | 38   | 23   | 21   | 49    | 57.5  | 31.5 | 10 | 13   | 23    |
| 12769 | 32   | 24   | 14   | 43    | 38    | 31   | 8  | 9.5  | 21    |
| 12770 | 35.5 | 26   | 16   | 53    | 45    | 33.5 | 10 | 13   | 26    |
| 12771 | 38   | 26.5 | 13   | 59    | 37    | 35   | 9  | 13   | 23    |
| 12772 | 40.5 | 28   | 18   | 56    | 46    | 33   | 15 | 16   | 108   |
| 12773 | 63.5 | 31   | 24   | 69    | 339   | 53   | 17 | 19   | 33    |
| 12774 | 35.5 | 24   | 16   | 52    | 50    | 34   | 10 | 11   | 23    |
| 12775 | 53   | 26   | 28   | 75    | 42    | 35   | 15 | 49   | 26    |
| 12776 | 51   | 45   | 32   | 102   | 62    | 47.5 | 24 | 32   | 88    |
| 12777 | 41   | 24   | 12   | 37    | 36    | 32   | 14 | 12   | 20    |
| 12778 | 42   | 27   | 20   | 82.5  | 42    | 34   | 10 | 14   | 26    |
| 12779 | 50   | 29   | 21   | 91    | 48    | 41   | 25 | 23   | 39    |
| 12780 | 40   | 25.5 | 14.5 | 48    | 40    | 32   | 9  | 26   | 23    |
| 12781 | 40   | 24   | 15   | 66    | 36    | 29   | 13 | 15   | 22    |
| 12782 | 60.5 | 26   | 25   | 109   | 47    | 33   | 14 | 20   | 30    |

|       |      |      |      |      |       |      |      |      |       |
|-------|------|------|------|------|-------|------|------|------|-------|
| 12783 | 38.5 | 27   | 30   | 79   | 42    | 34   | 28.5 | 14   | 47    |
| 12784 | 44   | 28.5 | 25   | 109  | 56.5  | 39   | 12   | 19   | 44.5  |
| 12785 | 38   | 22   | 21   | 104  | 39    | 33   | 9    | 15   | 23    |
| 12786 | 59   | 26   | 19   | 98   | 47    | 38   | 28   | 28   | 38    |
| 12787 | 45   | 33   | 25   | 76   | 40.5  | 36   | 14   | 21   | 64.5  |
| 12788 | 51   | 25   | 23   | 52.5 | 45.5  | 33   | 15   | 37   | 49    |
| 12789 | 64   | 27   | 165  | 99.5 | 48.5  | 39   | 14   | 32.5 | 40    |
| 12790 | 50   | 34   | 24   | 109  | 71    | 34.5 | 15   | 31   | 39    |
| 12791 | 54.5 | 30   | 36   | 131  | 55    | 36   | 17   | 35   | 181   |
| 12792 | 42   | 22   | 18   | 108  | 107.5 | 28   | 35   | 25   | 33    |
| 12793 | 73   | 41   | 50   | 101  | 45.5  | 41.5 | 24   | 34.5 | 115.5 |
| 12794 | 33   | 24   | 19   | 72   | 38    | 32   | 11   | 16   | 34    |
| 12795 | 35   | 22.5 | 13   | 69   | 35.5  | 28   | 8    | 18   | 19    |
| 12796 | 39   | 22   | 15   | 60.5 | 45    | 27   | 11.5 | 24   | 31    |
| 12797 | 45   | 23   | 20   | 69   | 62    | 30   | 27   | 26.5 | 25    |
| 12798 | 41   | 26   | 17   | 61   | 41    | 33   | 10   | 32   | 24    |
| 12799 | 32   | 22   | 13   | 58   | 38    | 30   | 12   | 17   | 22    |
| 12800 | 50   | 80   | 46.5 | 83   | 47    | 50   | 17   | 258  | 31    |
| 12801 | 55   | 25   | 21   | 63.5 | 40    | 33   | 13   | 46   | 29    |
| 12802 | 46   | 25   | 16   | 61   | 37    | 39   | 8.5  | 23   | 25    |
| 12803 | 41   | 23   | 15.5 | 65   | 57.5  | 28   | 14   | 81   | 32    |
| 12804 | 46   | 22   | 16   | 54   | 38.5  | 30   | 11   | 24   | 28    |
| 12805 | 118  | 77   | 66   | 93   | 85.5  | 81   | 99   | 343  | 89.5  |
| 12806 | 47   | 23   | 18   | 51.5 | 38    | 30   | 11   | 36   | 32    |
| 12807 | 41   | 25   | 19   | 65   | 49    | 31.5 | 12   | 27   | 25    |
| 12808 | 36   | 22   | 24   | 108  | 39    | 29   | 11   | 23   | 35    |
| 12809 | 37   | 22   | 19   | 75   | 36    | 26   | 11   | 15   | 38    |
| 12810 | 39   | 23   | 15   | 99   | 35    | 34   | 21   | 16   | 30    |
| 12811 | 53   | 20   | 16   | 80   | 36    | 27.5 | 10   | 14.5 | 22    |
| 12812 | 45   | 24   | 29   | 138  | 39    | 32.5 | 20   | 24   | 26    |
| 12813 | 44   | 23   | 26   | 115  | 35    | 29   | 17   | 35   | 26    |
| 12814 | 37   | 23   | 20   | 54   | 50.5  | 32   | 29   | 13   | 24    |
| 12815 | 66.5 | 25   | 21   | 97.5 | 595.5 | 34   | 12   | 28   | 74    |
| 12816 | 66   | 29   | 22   | 91   | 41    | 48.5 | 14   | 25   | 40    |
| 12817 | 39   | 24   | 23   | 89   | 46.5  | 30   | 11   | 20   | 30    |
| 12818 | 79   | 39   | 34   | 148  | 56    | 39.5 | 22   | 62   | 56    |
| 12819 | 114  | 88   | 88   | 397  | 98.5  | 75   | 53   | 400  | 74    |
| 12820 | 152  | 33   | 46   | 237  | 50    | 43   | 30   | 100  | 51    |
| 12821 | 34   | 22   | 32   | 74   | 35    | 28   | 10   | 21   | 26    |
| 12822 | 80.5 | 32   | 28   | 112  | 66.5  | 32   | 28   | 50   | 59    |
| 12823 | 264  | 29   | 20   | 83.5 | 76    | 36   | 57   | 28   | 37    |
| 12824 | 33   | 25   | 15   | 65.5 | 36    | 32   | 9    | 19   | 20    |
| 12825 | 43.5 | 34   | 18   | 54   | 49    | 42   | 11   | 14.5 | 33    |
| 12826 | 36   | 25   | 19   | 74   | 78    | 28   | 10   | 18.5 | 40    |
| 12827 | 53   | 65   | 35   | 104  | 50    | 48   | 25   | 54   | 60    |
| 12828 | 51   | 60   | 31   | 91   | 44    | 46.5 | 23   | 44   | 59    |
| 12829 | 44   | 41   | 24   | 84   | 40    | 38   | 17   | 30.5 | 49    |

|       |      |      |      |       |      |      |      |      |       |
|-------|------|------|------|-------|------|------|------|------|-------|
| 12830 | 57.5 | 58   | 36   | 121   | 51.5 | 47   | 47.5 | 75.5 | 66    |
| 12831 | 47   | 55.5 | 30   | 87    | 69   | 43   | 21.5 | 45   | 60    |
| 12832 | 59.5 | 71   | 36   | 114.5 | 64   | 49   | 32   | 59   | 89    |
| 12833 | 66   | 61.5 | 38   | 150   | 49   | 47   | 24   | 48   | 69    |
| 12834 | 51   | 64   | 39   | 103   | 51   | 46.5 | 23   | 47.5 | 65    |
| 12835 | 46   | 50   | 28   | 82.5  | 38.5 | 41   | 20   | 46   | 58    |
| 12836 | 62.5 | 75   | 45   | 108   | 50   | 56.5 | 34   | 63   | 81.5  |
| 12837 | 113  | 36   | 20   | 90    | 39   | 44   | 15   | 25   | 36.5  |
| 12838 | 74   | 74   | 33   | 119   | 49.5 | 49   | 28   | 56   | 78    |
| 12839 | 37   | 33   | 22   | 65    | 38   | 30   | 14   | 23   | 36    |
| 12840 | 44   | 60   | 35   | 107   | 44   | 42   | 24   | 48   | 87    |
| 12841 | 46   | 24   | 17.5 | 78    | 36.5 | 28   | 9    | 15   | 35    |
| 12842 | 59   | 79.5 | 39.5 | 105.5 | 55   | 57   | 28   | 64   | 108.5 |
| 12843 | 54   | 53   | 29   | 106   | 39   | 43   | 20   | 41   | 55    |
| 12844 | 54.5 | 73   | 38   | 108.5 | 52.5 | 52   | 35   | 55   | 92    |
| 12845 | 44.5 | 40   | 20   | 68    | 39   | 33   | 12   | 28   | 36    |
| 12846 | 52   | 51   | 25.5 | 125   | 39.5 | 36   | 18   | 41   | 50    |
| 12847 | 62   | 44   | 22   | 88    | 40   | 40   | 18.5 | 37   | 46    |
| 12848 | 36   | 21   | 15   | 62    | 33   | 29   | 11   | 16   | 48    |
| 12849 | 41   | 22   | 19   | 87    | 42   | 28   | 10   | 18   | 24    |
| 12850 | 53   | 66   | 31.5 | 109.5 | 44   | 44   | 25   | 56   | 70    |
| 12851 | 39.5 | 36   | 22   | 84.5  | 33.5 | 35   | 14   | 27   | 70    |
| 12852 | 56   | 73   | 36   | 140   | 48.5 | 50.5 | 26.5 | 56   | 71    |
| 12853 | 59.5 | 62   | 32.5 | 110   | 47.5 | 45   | 25   | 46   | 71    |
| 12854 | 48   | 58   | 27   | 85    | 42   | 43   | 21   | 45.5 | 127   |
| 12855 | 34   | 29   | 21   | 77.5  | 36   | 33   | 13   | 22   | 27    |
| 12856 | 53   | 54   | 29   | 81.5  | 41   | 45   | 22   | 63   | 52    |
| 12857 | 41   | 39   | 20   | 83    | 59.5 | 33   | 15   | 29   | 51    |
| 12858 | 56   | 51   | 27   | 114   | 40   | 37   | 21   | 39   | 51    |
| 12859 | 42   | 41   | 23   | 77.5  | 36   | 33.5 | 17   | 36   | 54    |
| 12860 | 58   | 80   | 36   | 104   | 49   | 50   | 26   | 63   | 75    |
| 12861 | 59   | 68.5 | 31.5 | 90.5  | 46   | 49   | 29   | 56   | 76    |
| 12862 | 39   | 34   | 22   | 76    | 34.5 | 32.5 | 12.5 | 23   | 36    |
| 12863 | 46   | 42   | 24   | 84    | 32.5 | 37   | 25   | 36   | 67    |
| 12864 | 47   | 53.5 | 30   | 92.5  | 42   | 41   | 20   | 40   | 54    |
| 12865 | 51   | 52   | 30   | 89    | 45   | 41   | 22   | 42   | 51.5  |
| 12866 | 47   | 64   | 32   | 92    | 42.5 | 47.5 | 24   | 46.5 | 66.5  |
| 12867 | 44   | 45.5 | 25   | 79    | 42   | 35   | 17   | 33   | 77    |
| 12868 | 60.5 | 40   | 27   | 89    | 41.5 | 34   | 16   | 36   | 51    |
| 12869 | 44   | 54   | 28   | 85    | 42   | 43   | 21   | 39   | 72.5  |
| 12870 | 68   | 24   | 33   | 105   | 34   | 25   | 12   | 31   | 38    |
| 12871 | 64   | 35   | 24.5 | 125   | 53.5 | 52   | 28   | 24   | 41    |
| 12872 | 38   | 35   | 24   | 76    | 51   | 39.5 | 11   | 18   | 29    |
| 12873 | 45   | 31   | 27   | 98    | 52   | 41   | 12   | 20.5 | 30    |
| 12874 | 40   | 32   | 20   | 72    | 52   | 42   | 14   | 15.5 | 31    |
| 12875 | 34.5 | 36   | 18   | 52    | 45   | 38   | 8    | 12   | 26    |
| 12876 | 41   | 31   | 20   | 84    | 46   | 36   | 31   | 15   | 28    |

|       |       |      |      |       |      |      |      |      |      |
|-------|-------|------|------|-------|------|------|------|------|------|
| 12877 | 58    | 34   | 28   | 129   | 52   | 43   | 18   | 28   | 35   |
| 12878 | 53    | 34   | 24   | 110   | 61   | 41.5 | 13   | 22   | 38   |
| 12879 | 36    | 32   | 19   | 80    | 57   | 37   | 10   | 14   | 34   |
| 12880 | 44.5  | 30   | 24   | 77    | 45   | 42   | 15   | 15   | 27   |
| 12881 | 154.5 | 49   | 30   | 83.5  | 56   | 57   | 18   | 32   | 40   |
| 12882 | 33    | 29   | 19   | 84    | 67.5 | 35   | 10   | 14   | 29   |
| 12883 | 37    | 28   | 17   | 66    | 44   | 37.5 | 10   | 13   | 27   |
| 12884 | 40.5  | 28   | 19   | 71    | 41   | 37   | 11   | 16   | 28   |
| 12885 | 34    | 27.5 | 17   | 58    | 40   | 38   | 36   | 13   | 24   |
| 12886 | 47    | 32   | 21   | 64    | 44   | 37   | 17   | 17   | 30   |
| 12887 | 41    | 27   | 25   | 59    | 46   | 38   | 10   | 11   | 36.5 |
| 12888 | 67    | 77   | 51   | 119   | 51   | 57   | 25   | 55   | 71   |
| 12889 | 55    | 61   | 39   | 127.5 | 56   | 47   | 25   | 67   | 107  |
| 12890 | 51    | 55   | 32   | 121.5 | 57   | 51   | 23   | 52   | 72   |
| 12891 | 69    | 59   | 43   | 120   | 62   | 53.5 | 28   | 53   | 64   |
| 12892 | 48    | 71   | 38   | 123   | 59   | 50   | 27   | 56   | 81   |
| 12893 | 53.5  | 49   | 29   | 97    | 51   | 56.5 | 17   | 33   | 117  |
| 12894 | 67.5  | 88   | 41.5 | 141   | 61   | 61   | 28.5 | 76   | 102  |
| 12895 | 77    | 77   | 43   | 124   | 65   | 59   | 30   | 67.5 | 93   |
| 12896 | 54    | 65.5 | 37   | 110   | 52   | 53   | 26   | 55   | 70   |
| 12897 | 77    | 47   | 27   | 114   | 50   | 45.5 | 17   | 36   | 51   |
| 12898 | 46.5  | 56.5 | 36   | 104   | 51   | 45   | 22   | 38   | 57   |
| 12899 | 56    | 36   | 23   | 108   | 61   | 40   | 16   | 40   | 43   |
| 12900 | 46    | 53   | 26   | 98    | 48   | 43   | 19   | 37   | 55   |
| 12901 | 72.5  | 75   | 40   | 134   | 62   | 57.5 | 28   | 59   | 72   |
| 12902 | 41.5  | 41   | 23   | 100   | 43   | 35   | 15   | 30.5 | 42   |
| 12903 | 61    | 52   | 29   | 98    | 43.5 | 44   | 21   | 37   | 76   |
| 12904 | 43    | 54   | 27   | 94    | 41   | 47   | 20   | 37.5 | 62   |
| 12905 | 67    | 73   | 37   | 141   | 61   | 50   | 34   | 59   | 77   |
| 12906 | 152   | 58   | 31   | 93    | 44   | 67   | 21.5 | 42   | 60.5 |
| 12907 | 38    | 40   | 28   | 99    | 52.5 | 39   | 15.5 | 29   | 43   |
| 12908 | 36.5  | 27   | 21   | 123.5 | 42   | 35   | 30   | 21   | 25   |
| 12909 | 23    | 22   | 12   | 41    | 31.5 | 29   | 8    | 9    | 18   |
| 12910 | 30    | 26   | 21   | 74.5  | 106  | 34   | 9.5  | 13   | 25   |
| 12911 | 28    | 24   | 15   | 39    | 32.5 | 27   | 10   | 10   | 20   |
| 12912 | 30    | 23.5 | 15   | 117   | 31.5 | 30   | 8    | 14   | 19   |
| 12913 | 29.5  | 23   | 13   | 44    | 53   | 29   | 8    | 11   | 18   |
| 12914 | 33    | 24   | 15   | 93    | 37   | 30   | 9    | 13   | 21.5 |
| 12915 | 26    | 23   | 10   | 38    | 35   | 31   | 7    | 9.5  | 18   |
| 12916 | 28    | 24   | 14   | 70.5  | 32   | 29   | 8    | 10   | 20   |
| 12917 | 32    | 25   | 18   | 66    | 42   | 32   | 12   | 14   | 22   |
| 12918 | 31    | 23   | 19   | 74    | 39.5 | 28   | 11   | 14   | 20   |
| 12919 | 44    | 30   | 23   | 80    | 53   | 33   | 18   | 22   | 25   |
| 12920 | 23    | 21   | 9    | 34.5  | 30   | 26   | 7    | 9.5  | 17   |
| 12921 | 25    | 23   | 10   | 37    | 31.5 | 27   | 10   | 9    | 18   |
| 12922 | 43    | 25   | 21   | 103   | 38   | 29   | 9    | 19   | 23   |
| 12923 | 37.5  | 26   | 17.5 | 74    | 43   | 29   | 21   | 22   | 28   |

|       |      |       |      |       |      |       |      |      |       |
|-------|------|-------|------|-------|------|-------|------|------|-------|
| 12924 | 37   | 27.5  | 20   | 49    | 59   | 37.5  | 9    | 14   | 26    |
| 12925 | 35   | 23    | 16   | 70    | 38   | 28    | 10   | 42   | 20    |
| 12926 | 91   | 42.5  | 25   | 102   | 64   | 81.5  | 16   | 24   | 35    |
| 12927 | 39   | 24    | 16.5 | 99    | 41   | 30    | 14   | 20   | 24    |
| 12928 | 26   | 23    | 14   | 61    | 37   | 26    | 8    | 14.5 | 16.5  |
| 12929 | 35.5 | 31    | 17   | 61    | 42   | 43    | 9.5  | 11   | 31    |
| 12930 | 95   | 127   | 39   | 143   | 38   | 166   | 18   | 73   | 119   |
| 12931 | 77   | 110   | 40   | 182   | 41   | 141.5 | 17   | 80   | 99    |
| 12932 | 79   | 106   | 36   | 134   | 39   | 126.5 | 18   | 66   | 88    |
| 12933 | 71.5 | 99    | 36   | 116.5 | 55   | 128.5 | 15   | 64   | 70    |
| 12934 | 73   | 91.5  | 30   | 105   | 39.5 | 140   | 18   | 61.5 | 70    |
| 12935 | 94   | 131.5 | 40   | 151   | 50.5 | 156.5 | 26   | 79   | 118   |
| 12936 | 158  | 119.5 | 43   | 166   | 46   | 149   | 25.5 | 74   | 124   |
| 12937 | 75   | 108   | 36.5 | 145   | 36   | 131   | 31   | 71   | 113   |
| 12938 | 82   | 90    | 35   | 137   | 28   | 129   | 14   | 62   | 106   |
| 12939 | 70   | 101   | 33   | 139   | 33   | 136   | 17   | 69   | 83    |
| 12940 | 78.5 | 119   | 37.5 | 145   | 39   | 138   | 19   | 83   | 90    |
| 12941 | 62.5 | 91    | 34   | 109.5 | 32   | 124   | 12.5 | 58   | 71    |
| 12942 | 68   | 91    | 33   | 126   | 34   | 131.5 | 14   | 59.5 | 79    |
| 12943 | 72.5 | 100   | 38   | 131   | 42.5 | 132   | 19   | 64   | 89    |
| 12944 | 82   | 108.5 | 37   | 143   | 50   | 127   | 21   | 67   | 95    |
| 12945 | 73.5 | 100   | 30   | 158   | 32   | 114.5 | 52   | 64   | 115   |
| 12946 | 90   | 107   | 34   | 140   | 34   | 178   | 23   | 87   | 128.5 |
| 12947 | 77   | 93    | 36   | 134.5 | 27   | 117   | 18   | 64   | 81    |
| 12948 | 59.5 | 85    | 33   | 116   | 37   | 110   | 16   | 56.5 | 74    |
| 12949 | 95   | 88    | 32   | 163   | 29   | 137   | 11   | 58.5 | 76.5  |
| 12950 | 61   | 87    | 30.5 | 119   | 29   | 121.5 | 14   | 58   | 103   |
| 12951 | 65   | 99.5  | 36   | 138.5 | 33   | 125   | 22.5 | 67   | 79    |
| 12952 | 71   | 88.5  | 31.5 | 108   | 28   | 165.5 | 11   | 78   | 74    |
| 12953 | 71   | 93    | 31.5 | 142   | 34   | 115   | 19   | 60   | 92    |
| 12954 | 64.5 | 89    | 30   | 145.5 | 33.5 | 118   | 15   | 67   | 83    |
| 12955 | 70.5 | 101   | 37   | 118   | 42.5 | 131   | 17   | 64   | 110.5 |
| 12956 | 72   | 83    | 35   | 131   | 45   | 99    | 20.5 | 63   | 87    |
| 12957 | 69.5 | 103   | 32   | 147   | 33   | 124   | 20   | 65   | 74.5  |
| 12958 | 60   | 85    | 34   | 129.5 | 36.5 | 117.5 | 15   | 60   | 74    |
| 12959 | 65.5 | 83    | 27   | 102.5 | 28   | 109   | 15   | 52   | 66    |
| 12960 | 64   | 92    | 31   | 128   | 34.5 | 131.5 | 15   | 63   | 69.5  |
| 12961 | 65.5 | 93    | 31   | 132   | 27   | 118.5 | 16   | 58.5 | 80    |
| 12962 | 64   | 95.5  | 30   | 131   | 31   | 116   | 19.5 | 60   | 75    |
| 12963 | 77   | 95.5  | 32   | 119   | 37   | 120   | 23   | 61   | 79.5  |
| 12964 | 60   | 88.5  | 30   | 129   | 37   | 115   | 15.5 | 64   | 105   |
| 12965 | 82   | 85    | 33   | 105   | 25   | 135.5 | 14   | 58.5 | 80    |
| 12966 | 67   | 81    | 31.5 | 135   | 29.5 | 105   | 16   | 54   | 73    |
| 12967 | 75.5 | 115   | 34.5 | 160   | 41   | 129.5 | 24   | 67   | 91    |
| 12968 | 53   | 76.5  | 30   | 100.5 | 32   | 109   | 10   | 61   | 58.5  |
| 12969 | 53   | 71    | 25   | 105   | 24   | 102.5 | 10   | 49   | 59    |
| 12970 | 51   | 72    | 28   | 107   | 29   | 114   | 10   | 54   | 61.5  |

|       |       |      |      |       |       |       |       |       |       |
|-------|-------|------|------|-------|-------|-------|-------|-------|-------|
| 12971 | 55    | 72   | 24   | 86    | 100   | 111.5 | 11    | 52.5  | 81    |
| 12972 | 47    | 69   | 21   | 68    | 20    | 106   | 8     | 44    | 46    |
| 12973 | 52    | 71   | 29   | 136   | 48    | 102.5 | 10    | 54    | 59    |
| 12974 | 59.5  | 69   | 29   | 129   | 31    | 106   | 20    | 49    | 72    |
| 12975 | 207   | 159  | 54   | 131   | 49    | 168   | 40.5  | 186   | 167.5 |
| 12976 | 58    | 76   | 27   | 126   | 25    | 108.5 | 12    | 54.5  | 80    |
| 12977 | 59    | 68   | 31   | 125.5 | 28    | 107.5 | 11    | 55    | 104   |
| 12978 | 240.5 | 63.5 | 25.5 | 115.5 | 27    | 100   | 11    | 48    | 71    |
| 12979 | 61    | 85   | 27   | 87    | 26    | 117   | 12    | 72    | 78    |
| 12980 | 55    | 79   | 24   | 80.5  | 65    | 97    | 9     | 52    | 54    |
| 12981 | 47    | 68   | 75   | 100.5 | 33    | 103   | 9     | 50    | 61    |
| 12982 | 47    | 68   | 25   | 96    | 21    | 104   | 9     | 45    | 69    |
| 12983 | 44    | 66   | 22.5 | 81    | 18    | 98    | 8     | 41    | 48.5  |
| 12984 | 51    | 72   | 24   | 81    | 25    | 106   | 15    | 63    | 53    |
| 12985 | 52    | 73   | 25   | 85    | 20.5  | 102   | 8     | 56    | 59    |
| 12986 | 56.5  | 75   | 25   | 101   | 22    | 98.5  | 7     | 50    | 63    |
| 12987 | 64    | 79   | 35   | 131   | 27    | 111.5 | 13    | 56.5  | 134   |
| 12988 | 85    | 92   | 51   | 210   | 117   | 127   | 16    | 122   | 138   |
| 12989 | 47    | 64   | 27   | 78    | 23    | 95    | 9     | 44    | 51    |
| 12990 | 51    | 72   | 22   | 85    | 21    | 107.5 | 18    | 49    | 61    |
| 12991 | 133.5 | 89   | 46   | 267   | 33    | 121   | 435.5 | 319.5 | 108   |
| 12992 | 46.5  | 63.5 | 27.5 | 98    | 31    | 95    | 12    | 49    | 56    |
| 12993 | 156.5 | 145  | 37   | 129   | 72    | 194   | 26    | 117   | 112   |
| 12994 | 55    | 64   | 25.5 | 113   | 18    | 88    | 12    | 50.5  | 76.5  |
| 12995 | 43    | 69.5 | 22   | 66    | 23    | 94    | 8     | 41    | 53.5  |
| 12996 | 62    | 69   | 30   | 133.5 | 35    | 89    | 13    | 53.5  | 122   |
| 12997 | 2265  | 4276 | 823  | 3690  | 1445  | 2695  | 1634  | 2085  | 2701  |
| 12998 | 49    | 68.5 | 26   | 75    | 26    | 89    | 9     | 44.5  | 53.5  |
| 12999 | 56.5  | 85   | 40   | 167.5 | 22    | 112   | 15    | 210   | 51    |
| 13000 | 52    | 76   | 27   | 95.5  | 211.5 | 96.5  | 301   | 50    | 54    |
| 13001 | 75    | 83   | 30   | 115   | 30.5  | 104   | 15    | 61    | 62    |
| 13002 | 52    | 83   | 43   | 106   | 80    | 111   | 11    | 54    | 72.5  |
| 13003 | 49.5  | 78   | 24   | 118   | 18    | 103   | 9     | 49    | 64    |
| 13004 | 47    | 67   | 24   | 108   | 20    | 87.5  | 9     | 42    | 79.5  |
| 13005 | 51.5  | 75   | 27   | 134   | 20    | 105   | 10    | 54    | 77.5  |
| 13006 | 62    | 91.5 | 29   | 149   | 26    | 108   | 15    | 58    | 79    |
| 13007 | 51    | 82   | 28   | 165   | 21    | 97    | 12    | 52.5  | 85.5  |
| 13008 | 59    | 76   | 31   | 109.5 | 102   | 101   | 16    | 57    | 65    |
| 13009 | 135   | 72   | 35   | 116   | 45.5  | 101   | 12    | 52.5  | 56    |
| 13010 | 82    | 79   | 43   | 108   | 24.5  | 106.5 | 11    | 51    | 119   |
| 13011 | 69    | 62.5 | 28   | 69    | 22.5  | 85    | 14    | 49    | 47    |
| 13012 | 52.5  | 66   | 24.5 | 119.5 | 22    | 97    | 11    | 55    | 165   |
| 13013 | 43    | 61   | 20   | 55.5  | 13    | 92    | 6     | 39.5  | 47    |
| 13014 | 116   | 69   | 27   | 81.5  | 22    | 103   | 14    | 63    | 47    |
| 13015 | 66    | 64   | 27   | 111   | 26    | 77    | 10    | 51.5  | 56    |
| 13016 | 61    | 70   | 28   | 86    | 34    | 104   | 18    | 49    | 95    |
| 13017 | 51    | 63   | 27   | 107   | 23    | 91    | 27    | 54    | 44    |

|       |       |      |      |       |      |       |    |      |      |
|-------|-------|------|------|-------|------|-------|----|------|------|
| 13018 | 50    | 60   | 21   | 64    | 20   | 92    | 11 | 47   | 44   |
| 13019 | 54    | 58   | 23   | 81    | 17.5 | 95    | 9  | 45   | 52.5 |
| 13020 | 48    | 60   | 25   | 78.5  | 23   | 95    | 23 | 50.5 | 46   |
| 13021 | 47.5  | 61   | 21   | 85.5  | 21   | 94.5  | 9  | 43   | 45   |
| 13022 | 61    | 59   | 24   | 104.5 | 28   | 90.5  | 12 | 45   | 48   |
| 13023 | 45    | 61   | 24   | 97    | 21   | 90    | 10 | 47   | 51   |
| 13024 | 55.5  | 59   | 24   | 68    | 29   | 92    | 19 | 40.5 | 59   |
| 13025 | 49.5  | 67   | 23.5 | 103   | 22   | 103   | 11 | 42   | 53   |
| 13026 | 58    | 80   | 31.5 | 133.5 | 51   | 98    | 16 | 74   | 77   |
| 13027 | 51    | 58   | 32.5 | 83    | 19   | 93.5  | 15 | 44   | 45   |
| 13028 | 48    | 64   | 23   | 80    | 23   | 93    | 30 | 45   | 46   |
| 13029 | 222.5 | 79   | 29   | 76    | 83   | 111   | 31 | 82.5 | 67   |
| 13030 | 61    | 64   | 24   | 67    | 19   | 103.5 | 13 | 51   | 44   |
| 13031 | 349   | 72   | 28   | 81    | 27   | 111   | 10 | 52   | 58   |
| 13032 | 82    | 91.5 | 27   | 121.5 | 28   | 128.5 | 16 | 56   | 85   |
| 13033 | 55    | 72   | 25   | 119.5 | 21   | 98    | 13 | 48.5 | 66   |
| 13034 | 63.5  | 79   | 28   | 124.5 | 26   | 118.5 | 13 | 51   | 61   |
| 13035 | 53    | 76   | 29   | 114.5 | 23   | 99.5  | 16 | 52   | 55   |
| 13036 | 53    | 76   | 25   | 108.5 | 24.5 | 95    | 18 | 52   | 59.5 |
| 13037 | 59    | 87   | 28   | 102   | 30.5 | 100.5 | 18 | 56   | 76   |
| 13038 | 58.5  | 78   | 24   | 98    | 23   | 115.5 | 11 | 47   | 59.5 |
| 13039 | 68    | 92.5 | 26   | 117   | 28   | 123   | 15 | 52   | 95   |
| 13040 | 58    | 84   | 29   | 131   | 37   | 105   | 20 | 55   | 68   |
| 13041 | 61    | 80   | 23   | 120   | 22   | 102   | 15 | 50   | 68   |
| 13042 | 51    | 77   | 26   | 114   | 25   | 103   | 14 | 52   | 62   |
| 13043 | 61.5  | 75   | 25.5 | 110   | 28   | 101   | 15 | 48   | 82   |
| 13044 | 65.5  | 83   | 26   | 115   | 32   | 105   | 17 | 48   | 99   |
| 13045 | 61.5  | 78   | 26   | 109   | 25   | 97    | 17 | 51.5 | 68   |
| 13046 | 51    | 71.5 | 47   | 94    | 30   | 98.5  | 12 | 47.5 | 55   |
| 13047 | 53    | 76   | 25   | 115   | 31   | 96    | 14 | 50   | 60   |
| 13048 | 64    | 92   | 31   | 146   | 28   | 110   | 22 | 60.5 | 73   |
| 13049 | 47.5  | 71   | 24   | 107   | 23.5 | 91.5  | 13 | 45   | 72.5 |
| 13050 | 59    | 86.5 | 27   | 125   | 25   | 104   | 17 | 52   | 60   |
| 13051 | 59.5  | 89   | 31.5 | 138   | 32   | 104   | 21 | 60   | 72   |
| 13052 | 57.5  | 75   | 28   | 101   | 26   | 98    | 18 | 55   | 72   |
| 13053 | 125.5 | 73   | 24   | 102   | 28   | 102   | 15 | 49   | 67   |
| 13054 | 78.5  | 83   | 34   | 112   | 29   | 110   | 19 | 51   | 78   |
| 13055 | 60.5  | 84   | 25   | 130   | 29   | 105.5 | 17 | 49   | 65   |
| 13056 | 55    | 86   | 25   | 126   | 29   | 104   | 19 | 55   | 77   |
| 13057 | 296   | 67   | 25   | 109.5 | 22   | 98    | 12 | 43   | 69   |
| 13058 | 53    | 78   | 25   | 98    | 23   | 100   | 13 | 50   | 71.5 |
| 13059 | 45    | 61   | 24   | 91    | 89   | 81    | 9  | 41   | 59   |
| 13060 | 57    | 68   | 25.5 | 110   | 16   | 106   | 10 | 130  | 70   |
| 13061 | 93    | 109  | 35   | 168   | 46   | 123.5 | 28 | 85   | 95   |
| 13062 | 51    | 74   | 26   | 115   | 23   | 92    | 12 | 48   | 96   |
| 13063 | 68    | 94   | 30   | 133   | 30   | 165   | 17 | 80   | 91.5 |
| 13064 | 57    | 80   | 31   | 128   | 30   | 100   | 15 | 51.5 | 65   |



|       |       |       |      |       |      |       |      |      |       |
|-------|-------|-------|------|-------|------|-------|------|------|-------|
| 13065 | 42.5  | 59    | 21   | 112   | 16.5 | 88    | 9    | 37   | 40.5  |
| 13066 | 61    | 84    | 29   | 125.5 | 39   | 105   | 16   | 59.5 | 68    |
| 13067 | 51    | 73    | 23   | 102   | 22.5 | 93    | 13   | 46   | 71    |
| 13068 | 43    | 55    | 17   | 54.5  | 15   | 78    | 9    | 38   | 47    |
| 13069 | 56    | 83    | 29   | 130   | 26   | 97.5  | 16   | 54   | 73    |
| 13070 | 57.5  | 83    | 44.5 | 119   | 27   | 106   | 18   | 70   | 68    |
| 13071 | 41.5  | 58    | 24   | 89    | 19   | 84    | 10   | 43   | 53.5  |
| 13072 | 40    | 59    | 19   | 103   | 16   | 87    | 7    | 42.5 | 38.5  |
| 13073 | 39.5  | 57    | 22   | 76    | 23   | 88.5  | 11   | 39   | 43.5  |
| 13074 | 80    | 60.5  | 20   | 66.5  | 28   | 91    | 11   | 59   | 51    |
| 13075 | 61.5  | 68.5  | 24   | 76    | 22.5 | 96    | 12   | 55   | 56.5  |
| 13076 | 65    | 71    | 22.5 | 94    | 22   | 117   | 10   | 53   | 58    |
| 13077 | 44    | 60    | 23   | 77    | 19   | 101   | 9    | 51   | 45    |
| 13078 | 60    | 92    | 32   | 127   | 33   | 116   | 12   | 58   | 82    |
| 13079 | 62    | 97.5  | 33   | 104   | 30   | 120   | 10   | 67   | 113.5 |
| 13080 | 95    | 99    | 29   | 102   | 23   | 119   | 10   | 75   | 63    |
| 13081 | 56    | 82    | 28   | 100.5 | 20   | 125   | 9    | 48   | 87    |
| 13082 | 46.5  | 75.5  | 27.5 | 102   | 21   | 102.5 | 10   | 49.5 | 68    |
| 13083 | 47    | 81    | 30   | 89    | 20   | 101   | 8    | 54   | 53.5  |
| 13084 | 62    | 93    | 31   | 134   | 38   | 120   | 12   | 64.5 | 73    |
| 13085 | 61    | 87    | 36   | 139   | 32   | 108   | 11   | 65   | 97    |
| 13086 | 67    | 88    | 36.5 | 133   | 36   | 119   | 12   | 84   | 115.5 |
| 13087 | 90.5  | 91    | 29   | 129   | 30   | 116.5 | 11   | 57   | 57    |
| 13088 | 87    | 92    | 30   | 124   | 29   | 139   | 13   | 62   | 73.5  |
| 13089 | 48.5  | 78    | 27.5 | 96    | 24   | 98    | 12   | 53   | 66    |
| 13090 | 78    | 90    | 35   | 128   | 28   | 112.5 | 15   | 57.5 | 70    |
| 13091 | 60    | 69    | 32   | 117   | 40   | 101   | 11   | 48   | 71    |
| 13092 | 55    | 80.5  | 29   | 94    | 29   | 109   | 18   | 52   | 92.5  |
| 13093 | 55    | 85    | 31.5 | 126   | 40   | 116.5 | 19   | 60   | 63    |
| 13094 | 55    | 84    | 30   | 92    | 26   | 117   | 9    | 72   | 64    |
| 13095 | 58    | 82.5  | 29   | 118.5 | 39   | 108.5 | 9    | 72.5 | 52    |
| 13096 | 71    | 83    | 27   | 124.5 | 24.5 | 114   | 13   | 55   | 57.5  |
| 13097 | 46    | 77    | 24   | 93    | 22   | 100   | 8    | 50.5 | 58    |
| 13098 | 49.5  | 77.5  | 27   | 100   | 20   | 112   | 9    | 48   | 60    |
| 13099 | 98.5  | 125   | 43   | 154   | 40.5 | 189   | 24.5 | 79.5 | 108   |
| 13100 | 89    | 113   | 43.5 | 143.5 | 36   | 133   | 23   | 78.5 | 109   |
| 13101 | 150.5 | 127   | 49   | 170.5 | 46   | 153   | 28   | 82   | 109   |
| 13102 | 90.5  | 126   | 38   | 148   | 41   | 150   | 22   | 78   | 138.5 |
| 13103 | 87.5  | 111   | 41   | 149.5 | 50.5 | 134.5 | 21.5 | 71.5 | 99    |
| 13104 | 95    | 125   | 39   | 169   | 54   | 142   | 28   | 82.5 | 111   |
| 13105 | 90    | 103   | 37   | 122   | 29.5 | 129.5 | 22   | 64   | 76    |
| 13106 | 88    | 117.5 | 41   | 164.5 | 45   | 136   | 85.5 | 73   | 98.5  |
| 13107 | 75    | 102   | 37   | 175   | 34   | 135   | 19   | 67   | 131.5 |
| 13108 | 82.5  | 108.5 | 40   | 153   | 39   | 155   | 23   | 96   | 124   |
| 13109 | 93    | 110   | 44   | 139   | 47   | 139   | 24   | 77   | 113   |
| 13110 | 83    | 108.5 | 35   | 152.5 | 37   | 131.5 | 20   | 67.5 | 109.5 |
| 13111 | 76    | 91    | 34   | 138   | 44   | 145   | 22   | 67   | 101   |

|       |       |       |       |       |      |       |      |      |       |
|-------|-------|-------|-------|-------|------|-------|------|------|-------|
| 13112 | 68.5  | 97    | 41    | 117   | 53.5 | 127   | 19   | 67.5 | 84    |
| 13113 | 84    | 93    | 37    | 142.5 | 52.5 | 118.5 | 42   | 71.5 | 91    |
| 13114 | 75    | 114   | 41    | 164   | 41   | 140.5 | 26   | 73   | 118   |
| 13115 | 79    | 105   | 36    | 164   | 40   | 144   | 16   | 80   | 168   |
| 13116 | 84    | 109   | 38    | 140   | 68   | 124   | 22   | 69   | 86    |
| 13117 | 77    | 106   | 36    | 155   | 118  | 139   | 22   | 66.5 | 123   |
| 13118 | 101   | 114   | 44    | 135   | 41   | 136.5 | 24   | 70   | 87.5  |
| 13119 | 70.5  | 100   | 35    | 126   | 32   | 130   | 21   | 71   | 104.5 |
| 13120 | 92    | 96    | 34    | 140   | 37   | 125.5 | 18   | 68   | 82.5  |
| 13121 | 92.5  | 116.5 | 43.5  | 170   | 43   | 130.5 | 24   | 72   | 89.5  |
| 13122 | 94.5  | 78    | 31    | 123.5 | 64.5 | 92    | 18   | 55   | 65    |
| 13123 | 72    | 99    | 35    | 148.5 | 37   | 122   | 22   | 70   | 82    |
| 13124 | 81    | 117   | 37    | 187   | 48   | 132   | 26   | 69   | 118   |
| 13125 | 85    | 93    | 32    | 132   | 29   | 125   | 19   | 58   | 74.5  |
| 13126 | 56    | 79    | 29    | 102   | 31   | 120   | 13   | 52   | 98    |
| 13127 | 75    | 106.5 | 35    | 179.5 | 45   | 130   | 21   | 68   | 81.5  |
| 13128 | 81    | 100   | 34    | 164   | 46   | 116   | 23   | 71   | 103   |
| 13129 | 81    | 106   | 43    | 206   | 35   | 131   | 23   | 68.5 | 143.5 |
| 13130 | 69    | 85    | 35    | 139   | 32   | 109   | 19   | 58   | 70    |
| 13131 | 78    | 113   | 42    | 165.5 | 50   | 121   | 36   | 70   | 112   |
| 13132 | 70.5  | 104   | 35    | 149   | 42.5 | 128   | 24   | 62   | 86    |
| 13133 | 70    | 86    | 33    | 132   | 33   | 114   | 19   | 62   | 80    |
| 13134 | 93    | 91    | 35    | 147   | 37   | 123   | 15   | 72   | 119   |
| 13135 | 74    | 81    | 36    | 123   | 27.5 | 109   | 14   | 64   | 80    |
| 13136 | 67.5  | 71    | 26.5  | 90    | 127  | 108   | 10   | 47   | 58    |
| 13137 | 57    | 72    | 24    | 106   | 27   | 113   | 9    | 50.5 | 50    |
| 13138 | 50    | 63    | 26.5  | 92    | 22   | 115   | 9    | 51   | 52    |
| 13139 | 55.5  | 62.5  | 24    | 94    | 19   | 94    | 10   | 45.5 | 65    |
| 13140 | 60    | 68    | 30    | 72    | 38   | 106   | 10   | 91   | 50    |
| 13141 | 116.5 | 66    | 29    | 78.5  | 34   | 107   | 17   | 57.5 | 51    |
| 13142 | 59    | 72    | 29    | 86    | 39   | 106   | 12   | 51   | 56    |
| 13143 | 53    | 63    | 25    | 123   | 29   | 98.5  | 12   | 45   | 51    |
| 13144 | 50    | 65    | 26    | 109   | 26   | 108.5 | 10   | 55.5 | 51    |
| 13145 | 54.5  | 72    | 27    | 107   | 20   | 109   | 8    | 48   | 58    |
| 13146 | 52    | 63.5  | 29    | 82    | 23   | 110   | 8    | 46   | 52    |
| 13147 | 83.5  | 73    | 25    | 97.5  | 26   | 103   | 12.5 | 49   | 61    |
| 13148 | 60    | 93    | 128.5 | 111   | 61   | 119   | 10   | 92   | 65    |
| 13149 | 58    | 72.5  | 27    | 74    | 135  | 119.5 | 11   | 49   | 53    |
| 13150 | 54    | 70    | 22    | 74    | 28   | 115   | 9    | 49.5 | 51.5  |
| 13151 | 59    | 77    | 29    | 129   | 32   | 110.5 | 12   | 60   | 67    |
| 13152 | 54.5  | 71    | 23    | 84    | 29.5 | 111.5 | 12   | 48   | 55.5  |
| 13153 | 56    | 72    | 28.5  | 112   | 21.5 | 115.5 | 11   | 48   | 71    |
| 13154 | 48    | 71    | 22    | 90    | 19   | 112   | 8    | 48   | 51.5  |
| 13155 | 85    | 70.5  | 33    | 142   | 38   | 109   | 22   | 58   | 83    |
| 13156 | 55.5  | 65    | 26    | 104.5 | 22   | 92    | 10   | 42   | 68.5  |
| 13157 | 64.5  | 72    | 30    | 155   | 43   | 107   | 20   | 58   | 56    |
| 13158 | 56    | 71.5  | 32.5  | 99    | 30   | 101.5 | 40   | 59   | 68    |

|       |      |       |      |       |      |       |       |      |       |
|-------|------|-------|------|-------|------|-------|-------|------|-------|
| 13159 | 56   | 71    | 28   | 73.5  | 21   | 103   | 9     | 45   | 68    |
| 13160 | 70   | 72    | 28   | 103   | 31   | 105   | 31    | 50   | 118.5 |
| 13161 | 86   | 76    | 30.5 | 87    | 23   | 116.5 | 19    | 60   | 62    |
| 13162 | 73   | 74    | 28   | 78    | 51   | 110.5 | 13    | 63   | 67.5  |
| 13163 | 68   | 68.5  | 28   | 110.5 | 26   | 103   | 14    | 52   | 60    |
| 13164 | 113  | 66.5  | 24   | 83.5  | 28   | 100   | 16    | 48   | 50.5  |
| 13165 | 225  | 91    | 28.5 | 71    | 32   | 162   | 14    | 79.5 | 70    |
| 13166 | 53   | 66    | 26   | 120   | 25   | 102   | 12    | 54   | 47    |
| 13167 | 77   | 116.5 | 40   | 190.5 | 36   | 145   | 27    | 76   | 115   |
| 13168 | 47   | 56    | 24   | 92    | 18   | 91.5  | 8     | 46   | 41    |
| 13169 | 53   | 74    | 27.5 | 162   | 23   | 105   | 9     | 53   | 47    |
| 13170 | 61.5 | 82.5  | 28   | 126   | 24.5 | 120   | 13    | 123  | 54.5  |
| 13171 | 52   | 72    | 27   | 91.5  | 19   | 111   | 9     | 51   | 52    |
| 13172 | 52.5 | 66    | 24   | 102   | 19   | 102   | 11    | 46   | 47    |
| 13173 | 49   | 55.5  | 27   | 135   | 23   | 96    | 9     | 50   | 48    |
| 13174 | 59.5 | 70    | 29.5 | 199   | 24   | 111.5 | 12    | 62.5 | 64.5  |
| 13175 | 40   | 44    | 20   | 55.5  | 15.5 | 61    | 8     | 30   | 27    |
| 13176 | 53   | 70    | 27   | 131   | 20   | 102   | 12    | 55   | 48    |
| 13177 | 44.5 | 68    | 24   | 115   | 17   | 101   | 9     | 45   | 43    |
| 13178 | 56.5 | 77    | 27   | 159   | 21   | 117   | 11    | 57.5 | 58    |
| 13179 | 64   | 47    | 26   | 123   | 19   | 70    | 9     | 37   | 37    |
| 13180 | 52   | 68    | 33   | 99    | 26.5 | 107   | 9.5   | 45   | 49    |
| 13181 | 50   | 60    | 23   | 94.5  | 21   | 96    | 21    | 45   | 78    |
| 13182 | 78   | 78    | 34   | 134   | 27   | 121   | 16    | 71   | 76    |
| 13183 | 44   | 64    | 23   | 79.5  | 17   | 104   | 8     | 46   | 47    |
| 13184 | 51   | 61    | 26   | 132   | 22   | 100   | 11    | 58   | 58    |
| 13185 | 50   | 64    | 26   | 120   | 18   | 99.5  | 10    | 49   | 43    |
| 13186 | 61   | 60    | 22   | 88    | 19   | 103   | 7     | 43   | 48    |
| 13187 | 54   | 66    | 33   | 121   | 19   | 108.5 | 11    | 45.5 | 87    |
| 13188 | 57   | 61    | 20   | 74.5  | 23   | 92    | 9     | 39   | 47    |
| 13189 | 142  | 78    | 42   | 103   | 55   | 112   | 117.5 | 107  | 63    |
| 13190 | 97.5 | 127   | 31   | 216   | 34   | 115.5 | 18    | 64   | 98    |
| 13191 | 132  | 61    | 21   | 66    | 33   | 93    | 10    | 45   | 48    |
| 13192 | 61.5 | 73    | 27   | 155   | 22   | 106   | 10    | 56.5 | 64    |
| 13193 | 49   | 64    | 23   | 90    | 40   | 106   | 8     | 48   | 44    |
| 13194 | 62   | 61.5  | 27   | 66.5  | 21   | 89    | 16    | 66   | 47    |
| 13195 | 93   | 61.5  | 24   | 70.5  | 52   | 91    | 11    | 57   | 47    |
| 13196 | 72   | 66    | 27   | 76    | 20.5 | 115   | 12    | 53.5 | 56    |
| 13197 | 463  | 115.5 | 27   | 77.5  | 37   | 564   | 17    | 83   | 165   |
| 13198 | 53   | 52    | 27   | 118   | 95   | 76.5  | 12    | 44.5 | 51    |
| 13199 | 44   | 55.5  | 24   | 102.5 | 21   | 89    | 9     | 44   | 51    |
| 13200 | 52.5 | 59    | 28   | 120   | 25   | 97    | 9     | 47   | 65    |
| 13201 | 76   | 74    | 37   | 188   | 35.5 | 111   | 16    | 73.5 | 90.5  |
| 13202 | 70   | 134   | 61   | 152   | 21   | 130   | 16    | 629  | 85    |
| 13203 | 72   | 66.5  | 32   | 163.5 | 22   | 100.5 | 11    | 69.5 | 70.5  |
| 13204 | 54   | 61.5  | 23   | 61.5  | 20   | 101   | 10    | 49   | 39    |
| 13205 | 77   | 95    | 28   | 173.5 | 29   | 132   | 18    | 64   | 97.5  |

|       |      |      |      |       |      |       |      |      |      |
|-------|------|------|------|-------|------|-------|------|------|------|
| 13206 | 59   | 86   | 30   | 131.5 | 31   | 105   | 21   | 54   | 72   |
| 13207 | 67.5 | 81   | 26   | 96    | 24   | 117   | 12   | 50   | 69   |
| 13208 | 65.5 | 84   | 28   | 114.5 | 25   | 109   | 16   | 55   | 75.5 |
| 13209 | 64   | 88   | 32   | 252   | 27   | 114   | 19   | 63   | 78   |
| 13210 | 57   | 69   | 55   | 123   | 26   | 82    | 15   | 48   | 63.5 |
| 13211 | 59   | 70.5 | 29   | 121   | 29   | 96    | 14   | 51   | 74   |
| 13212 | 69   | 109  | 32.5 | 140.5 | 34   | 117   | 26   | 59.5 | 101  |
| 13213 | 92   | 106  | 41   | 168   | 41   | 119   | 29   | 85   | 134  |
| 13214 | 74   | 102  | 34   | 141.5 | 59   | 124   | 28   | 66   | 94   |
| 13215 | 64.5 | 90   | 34   | 147.5 | 31   | 105.5 | 17   | 55   | 74   |
| 13216 | 71.5 | 115  | 41   | 96    | 52   | 140.5 | 25   | 69.5 | 87.5 |
| 13217 | 90.5 | 100  | 30   | 116   | 32   | 267   | 15   | 108  | 77   |
| 13218 | 58   | 72.5 | 30.5 | 131   | 28   | 88    | 16   | 49   | 76   |
| 13219 | 80   | 84   | 32   | 145   | 37   | 107   | 19   | 53.5 | 77   |
| 13220 | 62   | 76   | 29   | 127   | 29.5 | 95    | 18   | 50   | 69   |
| 13221 | 60   | 68.5 | 28   | 109   | 21   | 89    | 12   | 51   | 97   |
| 13222 | 82.5 | 93   | 37   | 140   | 31   | 108   | 24   | 57   | 95   |
| 13223 | 62   | 86   | 36   | 131   | 29   | 110   | 19   | 58   | 66   |
| 13224 | 64   | 87   | 34   | 155   | 76   | 106   | 20   | 58   | 82   |
| 13225 | 55.5 | 70   | 27   | 123   | 30   | 90    | 20   | 47   | 82   |
| 13226 | 77   | 101  | 34   | 176   | 36   | 105   | 25   | 60   | 117  |
| 13227 | 72   | 98   | 33   | 151   | 52   | 113   | 22   | 66.5 | 175  |
| 13228 | 59   | 74   | 28.5 | 123.5 | 27   | 90.5  | 21   | 66.5 | 84   |
| 13229 | 84   | 109  | 39   | 193   | 39   | 115   | 35   | 69   | 124  |
| 13230 | 65.5 | 82   | 32   | 139   | 29   | 95    | 19   | 52   | 73   |
| 13231 | 65   | 85   | 30   | 136   | 34   | 115   | 19   | 59   | 77   |
| 13232 | 70   | 110  | 35.5 | 151   | 36   | 110   | 25   | 66   | 85   |
| 13233 | 70.5 | 100  | 36   | 157.5 | 39   | 111   | 28   | 60   | 80   |
| 13234 | 89   | 104  | 40.5 | 148.5 | 38.5 | 116   | 31.5 | 83.5 | 95   |
| 13235 | 70.5 | 90   | 32   | 131   | 30.5 | 106   | 19   | 57   | 89   |
| 13236 | 54   | 69   | 26   | 111   | 20.5 | 99    | 12   | 47   | 75   |
| 13237 | 56.5 | 67   | 29.5 | 152   | 26   | 89.5  | 13   | 47   | 68   |
| 13238 | 68   | 87.5 | 29   | 129   | 28   | 116   | 19   | 53   | 73   |
| 13239 | 63.5 | 79   | 32   | 108   | 28   | 100   | 19.5 | 52   | 73.5 |
| 13240 | 53   | 66   | 35   | 100   | 23   | 95    | 13   | 40   | 64   |
| 13241 | 57   | 80   | 30   | 127.5 | 29   | 99    | 16   | 53   | 67   |
| 13242 | 68.5 | 109  | 31   | 140   | 33   | 130   | 24   | 60   | 92   |
| 13243 | 65.5 | 97   | 38   | 123.5 | 32   | 113.5 | 26   | 60.5 | 83.5 |
| 13244 | 60.5 | 71   | 31   | 126   | 30   | 101.5 | 17   | 50   | 70.5 |
| 13245 | 52   | 66   | 24   | 94    | 18   | 101   | 9    | 44   | 118  |
| 13246 | 49   | 67   | 24.5 | 112   | 24.5 | 106   | 9    | 45   | 73.5 |
| 13247 | 45   | 60   | 21   | 87    | 15.5 | 91    | 9    | 39   | 42   |
| 13248 | 48   | 59   | 21   | 92    | 19   | 89.5  | 8    | 38   | 94   |
| 13249 | 40   | 49.5 | 19   | 59.5  | 16   | 83    | 7    | 35   | 36   |
| 13250 | 73   | 60   | 21   | 66    | 20   | 97    | 11   | 42   | 53   |
| 13251 | 62   | 60   | 24   | 155   | 18.5 | 100   | 19   | 48   | 59   |
| 13252 | 52.5 | 61   | 23.5 | 154   | 21   | 99    | 24   | 48   | 50   |

|       |       |       |      |       |       |       |      |      |       |
|-------|-------|-------|------|-------|-------|-------|------|------|-------|
| 13253 | 59    | 58.5  | 24   | 79    | 28    | 93    | 9    | 51   | 45    |
| 13254 | 50    | 63    | 24   | 120.5 | 44    | 102   | 18.5 | 43   | 52    |
| 13255 | 224.5 | 63.5  | 21   | 76    | 18    | 108   | 10   | 47.5 | 47.5  |
| 13256 | 262   | 72    | 24   | 79    | 20    | 100   | 8    | 56.5 | 45    |
| 13257 | 64    | 75    | 28   | 70    | 24    | 109   | 35   | 56   | 57    |
| 13258 | 248   | 67    | 27   | 89    | 25    | 124   | 9    | 42   | 55.5  |
| 13259 | 59    | 57.5  | 26   | 73    | 22    | 98    | 10   | 43   | 60    |
| 13260 | 104   | 89.5  | 26.5 | 102   | 48    | 158   | 14   | 66.5 | 63    |
| 13261 | 45    | 61.5  | 20   | 65    | 14    | 90    | 6.5  | 41.5 | 46.5  |
| 13262 | 935   | 303.5 | 29   | 99    | 36    | 1606  | 13   | 179  | 396   |
| 13263 | 60    | 96.5  | 27   | 88    | 36    | 133   | 9    | 65   | 78.5  |
| 13264 | 195   | 113   | 32   | 89    | 26    | 320   | 12   | 77.5 | 100   |
| 13265 | 70.5  | 89    | 29   | 104   | 25    | 131   | 16.5 | 73   | 87    |
| 13266 | 71    | 92    | 25   | 104   | 24.5  | 134.5 | 9    | 69   | 65.5  |
| 13267 | 98    | 100.5 | 27   | 101   | 36.5  | 141   | 9    | 70   | 72    |
| 13268 | 48.5  | 86.5  | 25   | 93    | 22.5  | 113.5 | 12   | 57.5 | 59    |
| 13269 | 61    | 93    | 30   | 132.5 | 32    | 118.5 | 25   | 76   | 79    |
| 13270 | 49    | 85.5  | 21   | 109   | 18    | 119   | 8    | 53   | 58.5  |
| 13271 | 49    | 84    | 22.5 | 156   | 19    | 110   | 8    | 61.5 | 57    |
| 13272 | 66    | 77.5  | 28.5 | 152   | 30    | 110   | 75   | 83   | 69    |
| 13273 | 69.5  | 80.5  | 48   | 168.5 | 39    | 125   | 29   | 75   | 177   |
| 13274 | 65    | 93.5  | 29   | 94    | 59    | 133   | 12   | 74   | 58.5  |
| 13275 | 61    | 81    | 22   | 117   | 22    | 115   | 10   | 58   | 54    |
| 13276 | 73    | 81    | 24   | 121   | 25    | 115   | 22   | 55   | 59    |
| 13277 | 88    | 78    | 22   | 103   | 19    | 111   | 7    | 47   | 53    |
| 13278 | 61.5  | 82.5  | 27   | 96    | 21    | 109.5 | 10   | 54.5 | 161   |
| 13279 | 58    | 75    | 24   | 90    | 90    | 100   | 8    | 45   | 55    |
| 13280 | 61    | 76.5  | 26   | 91.5  | 19    | 108.5 | 10   | 56   | 57    |
| 13281 | 54.5  | 78    | 26   | 101   | 470   | 107   | 11   | 54   | 113   |
| 13282 | 63    | 73    | 27   | 111.5 | 73    | 104   | 17   | 52   | 812.5 |
| 13283 | 52    | 75.5  | 23   | 108   | 28    | 94    | 15   | 53.5 | 47    |
| 13284 | 50.5  | 68    | 23   | 98    | 30    | 101.5 | 14   | 50   | 47    |
| 13285 | 43    | 72    | 20   | 66.5  | 49    | 101   | 7    | 51   | 50    |
| 13286 | 53.5  | 80    | 22   | 79    | 198   | 101.5 | 10   | 48   | 56    |
| 13287 | 53.5  | 76    | 23   | 70    | 19    | 108   | 21   | 59   | 55    |
| 13288 | 63.5  | 81    | 31   | 157.5 | 120   | 109   | 13   | 58   | 65    |
| 13289 | 49    | 74.5  | 22   | 65    | 23    | 107   | 8    | 53   | 47    |
| 13290 | 42    | 72.5  | 21.5 | 83    | 19    | 101.5 | 8    | 47   | 49.5  |
| 13291 | 48    | 78    | 20   | 97    | 17    | 116.5 | 7    | 53   | 54.5  |
| 13292 | 58    | 79.5  | 23   | 76    | 24    | 111.5 | 8    | 63   | 50    |
| 13293 | 46    | 76    | 23   | 108   | 33    | 107.5 | 10   | 49   | 66    |
| 13294 | 35    | 18    | 15   | 54    | 22    | 19    | 7    | 14   | 34    |
| 13295 | 42    | 33    | 22   | 126   | 22    | 28    | 14   | 51.5 | 43    |
| 13296 | 40    | 24    | 24   | 65    | 25    | 19    | 18   | 17   | 39.5  |
| 13297 | 47    | 43    | 31   | 117   | 26    | 37    | 16.5 | 32.5 | 66    |
| 13298 | 43    | 37    | 23   | 97    | 113.5 | 30    | 12   | 24   | 59.5  |
| 13299 | 49.5  | 30    | 20   | 92    | 35.5  | 29    | 22   | 22   | 30.5  |

|       |       |      |      |       |      |      |      |      |       |
|-------|-------|------|------|-------|------|------|------|------|-------|
| 13300 | 54.5  | 53   | 30   | 107   | 29   | 44   | 18   | 31   | 60    |
| 13301 | 38    | 25   | 16   | 77    | 32   | 19   | 12   | 20   | 33    |
| 13302 | 25    | 19   | 12   | 57    | 37   | 12   | 7    | 25   | 17    |
| 13303 | 39    | 24.5 | 15   | 71    | 25   | 18   | 11   | 17   | 40    |
| 13304 | 34    | 19   | 17   | 69    | 17   | 20   | 9    | 19   | 31    |
| 13305 | 52    | 25   | 23   | 82    | 18   | 23   | 10   | 27.5 | 30    |
| 13306 | 45    | 31   | 29   | 80    | 23   | 24   | 14   | 20.5 | 26    |
| 13307 | 40    | 16   | 15   | 41    | 22   | 18.5 | 6    | 14   | 26    |
| 13308 | 32    | 18   | 14.5 | 49    | 16   | 17   | 8    | 15   | 35    |
| 13309 | 39    | 28   | 14   | 43    | 23.5 | 22   | 12   | 18   | 31    |
| 13310 | 71    | 75   | 44   | 173.5 | 44   | 88   | 23   | 53   | 102.5 |
| 13311 | 68.5  | 62   | 43   | 160   | 54   | 58   | 30   | 44   | 64    |
| 13312 | 50    | 35   | 27.5 | 114   | 29   | 33   | 19.5 | 29   | 47    |
| 13313 | 68.5  | 97   | 42   | 192   | 33   | 112  | 20   | 71   | 86.5  |
| 13314 | 30    | 21   | 19   | 62    | 16   | 22   | 14   | 19   | 23.5  |
| 13315 | 54.5  | 41   | 22   | 112   | 31   | 45   | 13   | 28   | 40    |
| 13316 | 29    | 12   | 13   | 49    | 22   | 16   | 6    | 12   | 19    |
| 13317 | 29.5  | 24.5 | 19   | 63.5  | 19   | 21   | 9.5  | 14   | 31    |
| 13318 | 49    | 39   | 22   | 101   | 35   | 29   | 15   | 30   | 43    |
| 13319 | 57    | 65   | 43   | 158.5 | 33   | 78   | 19   | 46   | 78    |
| 13320 | 62    | 56.5 | 32   | 146   | 31.5 | 58   | 21   | 47.5 | 82    |
| 13321 | 54    | 37.5 | 21   | 84    | 31   | 42   | 14   | 23   | 39    |
| 13322 | 43    | 27.5 | 28   | 121.5 | 29   | 31.5 | 13   | 26   | 45    |
| 13323 | 35    | 23   | 18   | 68    | 29   | 31   | 8    | 17   | 35.5  |
| 13324 | 24    | 15.5 | 11   | 41    | 20   | 14.5 | 7    | 15   | 27    |
| 13325 | 45    | 35   | 24   | 105   | 24   | 37   | 11   | 27.5 | 42    |
| 13326 | 75.5  | 74.5 | 30   | 158   | 44   | 100  | 21   | 55   | 81.5  |
| 13327 | 64    | 53   | 27   | 139   | 44   | 53   | 19.5 | 31   | 62    |
| 13328 | 77    | 74   | 37   | 195   | 60   | 60   | 26.5 | 52   | 76    |
| 13329 | 77.5  | 58   | 35   | 124   | 33   | 76.5 | 16   | 43   | 67    |
| 13330 | 64    | 62   | 31   | 133   | 29   | 75.5 | 15   | 47.5 | 64    |
| 13331 | 62    | 53.5 | 32   | 134.5 | 38   | 50   | 14   | 31.5 | 56    |
| 13332 | 40.5  | 35   | 17   | 99    | 22   | 39   | 12   | 26   | 32    |
| 13333 | 24.5  | 18   | 14   | 37    | 17   | 20   | 9    | 13.5 | 19    |
| 13334 | 77    | 61   | 32   | 156   | 44   | 51   | 25   | 43   | 118.5 |
| 13335 | 56    | 41   | 23   | 105.5 | 20.5 | 25   | 9    | 23   | 40    |
| 13336 | 44    | 30   | 20   | 109   | 71   | 29   | 13   | 26   | 39    |
| 13337 | 50    | 43.5 | 23   | 114.5 | 23   | 44   | 14.5 | 30   | 52    |
| 13338 | 68    | 82   | 33   | 172   | 27   | 107  | 13   | 59   | 64    |
| 13339 | 90    | 80   | 31.5 | 170   | 28.5 | 115  | 17   | 51.5 | 93    |
| 13340 | 58    | 40   | 33   | 147   | 101  | 46.5 | 13   | 32   | 51    |
| 13341 | 42    | 27   | 20   | 121   | 21   | 31   | 11   | 21   | 51.5  |
| 13342 | 16    | 12   | 9    | 32    | 8.5  | 9    | 10.5 | 9    | 11    |
| 13343 | 26    | 8.5  | 9    | 34    | 7    | 10   | 16   | 8.5  | 8     |
| 13344 | 18.5  | 8    | 9    | 38    | 9    | 9    | 5    | 10   | 15    |
| 13345 | 45    | 31   | 28   | 88    | 21   | 39   | 13   | 25   | 44    |
| 13346 | 118.5 | 64   | 29   | 128   | 29   | 101  | 20   | 63.5 | 62    |

|       |       |       |      |       |        |       |      |      |       |
|-------|-------|-------|------|-------|--------|-------|------|------|-------|
| 13347 | 61.5  | 57    | 24   | 165   | 23     | 82    | 29   | 44   | 45    |
| 13348 | 49    | 66    | 23.5 | 104.5 | 37     | 53.5  | 11   | 34   | 29.5  |
| 13349 | 52    | 16    | 20   | 82    | 17     | 23    | 9    | 24   | 23    |
| 13350 | 61    | 14    | 14.5 | 103   | 20     | 17.5  | 7    | 19   | 15    |
| 13351 | 17.5  | 8     | 9    | 36    | 19     | 10.5  | 5    | 11   | 11.5  |
| 13352 | 66    | 95    | 31   | 147   | 45     | 135   | 14   | 64   | 65    |
| 13353 | 50    | 15    | 15   | 34    | 983    | 50.5  | 10   | 23   | 21.5  |
| 13354 | 109.5 | 116   | 41   | 116   | 2238.5 | 210   | 13   | 71.5 | 86.5  |
| 13355 | 167   | 18    | 22   | 78    | 44     | 26    | 19   | 28   | 33.5  |
| 13356 | 189   | 89    | 33   | 130   | 62     | 115   | 22   | 78   | 73    |
| 13357 | 150   | 72    | 81.5 | 160   | 30     | 114   | 32   | 63.5 | 66    |
| 13358 | 150   | 62    | 40   | 111.5 | 31     | 86.5  | 67   | 55   | 51    |
| 13359 | 754   | 76    | 68.5 | 89    | 65.5   | 208   | 23   | 55   | 74    |
| 13360 | 54    | 57.5  | 22.5 | 141   | 25     | 78    | 11   | 43.5 | 57    |
| 13361 | 52    | 48    | 24.5 | 97    | 35     | 71    | 9.5  | 40   | 43    |
| 13362 | 35.5  | 28    | 18   | 54    | 18     | 34    | 10   | 23   | 26    |
| 13363 | 60    | 57.5  | 32.5 | 170   | 25     | 71    | 16   | 38.5 | 85    |
| 13364 | 46    | 31    | 26   | 96.5  | 24.5   | 40.5  | 14   | 32.5 | 50.5  |
| 13365 | 87    | 95    | 40   | 247   | 39     | 122   | 14.5 | 82   | 115   |
| 13366 | 92    | 61    | 24   | 92    | 28.5   | 142.5 | 11   | 40.5 | 67    |
| 13367 | 233   | 54    | 25.5 | 108   | 25     | 75    | 11   | 40.5 | 53    |
| 13368 | 83.5  | 58    | 31   | 94    | 37     | 95    | 11   | 48   | 52    |
| 13369 | 62    | 62    | 28   | 114   | 21     | 94.5  | 15   | 44   | 79    |
| 13370 | 176.5 | 110   | 34.5 | 184   | 22     | 267   | 15   | 75   | 115.5 |
| 13371 | 66.5  | 70    | 34   | 191.5 | 27.5   | 91    | 10   | 59   | 98    |
| 13372 | 259   | 73    | 28   | 167   | 118    | 393   | 16   | 67   | 100   |
| 13373 | 50    | 66    | 23   | 75    | 22     | 105.5 | 10   | 43   | 50    |
| 13374 | 80    | 39    | 22.5 | 66.5  | 32     | 64    | 10   | 32   | 42    |
| 13375 | 374   | 53    | 25   | 133.5 | 81     | 194   | 30   | 37   | 74    |
| 13376 | 49    | 47    | 25   | 110   | 56     | 69    | 9    | 37.5 | 60    |
| 13377 | 76    | 80    | 40   | 305.5 | 31     | 112   | 34   | 69   | 99    |
| 13378 | 123   | 71.5  | 48   | 317.5 | 86.5   | 99.5  | 94   | 141  | 144   |
| 13379 | 65    | 54    | 37   | 177   | 30     | 73.5  | 19   | 42   | 109.5 |
| 13380 | 68    | 28    | 27   | 153   | 26     | 34.5  | 13.5 | 53   | 85    |
| 13381 | 86    | 46    | 29   | 141   | 44.5   | 66    | 13   | 47.5 | 52    |
| 13382 | 35    | 28    | 18   | 76    | 14     | 40    | 7    | 32.5 | 27    |
| 13383 | 30    | 20    | 19   | 68    | 11     | 26.5  | 5    | 20   | 41    |
| 13384 | 40.5  | 46    | 24.5 | 115   | 17     | 70    | 8    | 33   | 60    |
| 13385 | 26.5  | 10    | 13   | 75    | 11     | 13    | 4    | 10   | 25.5  |
| 13386 | 83    | 111.5 | 31.5 | 195   | 27     | 147   | 12   | 70   | 116   |
| 13387 | 20    | 10    | 9    | 36    | 9      | 11    | 4.5  | 10   | 15    |
| 13388 | 78    | 135   | 33   | 147   | 27     | 177   | 14   | 81.5 | 100   |
| 13389 | 17    | 7     | 8.5  | 24    | 8      | 10    | 3    | 8    | 14    |
| 13390 | 69.5  | 108.5 | 31   | 92.5  | 24     | 144.5 | 11   | 67   | 81.5  |
| 13391 | 29    | 21    | 17   | 65    | 16     | 31    | 6    | 20   | 49.5  |
| 13392 | 73    | 99.5  | 34   | 137.5 | 29     | 148.5 | 13   | 71.5 | 105   |
| 13393 | 11.5  | 6     | 6    | 19    | 4      | 6     | 2    | 6    | 9     |

|       |       |       |      |       |      |       |      |      |       |
|-------|-------|-------|------|-------|------|-------|------|------|-------|
| 13394 | 78.5  | 134   | 35   | 128   | 26   | 179   | 12   | 79   | 93.5  |
| 13395 | 34    | 25    | 16   | 74    | 14   | 34    | 5    | 25.5 | 52    |
| 13396 | 32    | 22    | 19.5 | 89    | 21   | 32    | 6    | 26   | 130   |
| 13397 | 75    | 36    | 19   | 63    | 17   | 83.5  | 18   | 28.5 | 65.5  |
| 13398 | 81    | 11    | 13   | 40    | 34   | 13.5  | 5    | 12   | 16    |
| 13399 | 128   | 88    | 34   | 96    | 61.5 | 131   | 14   | 57   | 71    |
| 13400 | 28    | 11    | 11   | 65    | 19   | 21    | 11   | 15   | 13    |
| 13401 | 81    | 97    | 34   | 183   | 27   | 135   | 23   | 72   | 68    |
| 13402 | 37    | 8     | 9    | 29    | 13   | 8     | 5    | 9    | 7     |
| 13403 | 111.5 | 89    | 31   | 106   | 37   | 127.5 | 15   | 63   | 64.5  |
| 13404 | 37    | 29    | 15.5 | 65    | 27   | 41.5  | 11.5 | 25   | 28.5  |
| 13405 | 72    | 10    | 6    | 24    | 55   | 32    | 5    | 9    | 13    |
| 13406 | 272.5 | 111   | 31   | 108   | 188  | 217   | 20   | 70   | 89    |
| 13407 | 47    | 23    | 18   | 58    | 16   | 33    | 6    | 18.5 | 44    |
| 13408 | 28.5  | 23    | 17   | 75.5  | 16   | 21    | 8    | 18   | 42    |
| 13409 | 28    | 49    | 25   | 20    | 27   | 30    | 38   | 29   | 23    |
| 13410 | 81    | 122   | 38   | 194   | 50   | 142   | 24   | 73   | 97    |
| 13411 | 75    | 51    | 30.5 | 128.5 | 21   | 63    | 14   | 38   | 52.5  |
| 13412 | 38    | 30    | 22   | 107   | 16   | 30    | 7    | 24   | 28    |
| 13413 | 44    | 63    | 53   | 50    | 45   | 56    | 65   | 64   | 67    |
| 13414 | 29    | 22    | 14   | 72    | 20   | 19    | 8    | 14   | 24.5  |
| 13415 | 94    | 132   | 40   | 193   | 44   | 168   | 24   | 81   | 103.5 |
| 13416 | 22    | 19    | 16.5 | 53    | 13   | 15    | 7    | 13.5 | 23    |
| 13417 | 80    | 99.5  | 48.5 | 196   | 47   | 117   | 25   | 67.5 | 93.5  |
| 13418 | 25    | 17    | 12   | 76.5  | 13   | 15    | 6    | 13   | 37    |
| 13419 | 87.5  | 126   | 36   | 191.5 | 37.5 | 167   | 21   | 83   | 142   |
| 13420 | 22    | 14    | 12   | 52.5  | 17   | 13    | 6    | 20   | 24    |
| 13421 | 72    | 113.5 | 35   | 166   | 43   | 134   | 20   | 71   | 99.5  |
| 13422 | 90.5  | 33    | 20   | 116   | 19   | 30    | 13   | 24   | 41    |
| 13423 | 46    | 65    | 70   | 53    | 57   | 74    | 89   | 61   | 73    |
| 13424 | 138.5 | 102   | 41   | 244.5 | 35   | 100   | 25   | 67   | 84.5  |
| 13425 | 54    | 50.5  | 25   | 146   | 62   | 52    | 17   | 34   | 58    |
| 13426 | 60    | 61    | 43   | 155.5 | 40.5 | 59    | 22   | 47.5 | 65.5  |
| 13427 | 48    | 46    | 23   | 118   | 23   | 48    | 12   | 28   | 89    |
| 13428 | 64    | 20    | 15   | 67    | 15   | 18    | 8    | 19   | 32    |
| 13429 | 156   | 117   | 41   | 197.5 | 36   | 135   | 24   | 77   | 112   |
| 13430 | 37    | 27    | 19   | 90.5  | 19   | 26    | 10   | 21   | 30    |
| 13431 | 82.5  | 133   | 39   | 190   | 36   | 151   | 22   | 74   | 91    |
| 13432 | 39    | 34.5  | 19   | 84.5  | 16   | 42    | 8    | 29   | 46    |
| 13433 | 46    | 41    | 20.5 | 121.5 | 26   | 43    | 13   | 27   | 48    |
| 13434 | 41    | 31    | 18   | 99    | 18   | 34    | 12   | 22   | 48    |
| 13435 | 41    | 75    | 51   | 49    | 45   | 57    | 63   | 62   | 59    |
| 13436 | 68    | 90    | 33   | 178   | 32   | 115   | 21.5 | 62   | 98.5  |
| 13437 | 48    | 55    | 26.5 | 144   | 26   | 57.5  | 17   | 39   | 54    |
| 13438 | 62    | 76.5  | 31   | 145   | 39   | 64    | 24   | 43   | 96.5  |
| 13439 | 43    | 37    | 20   | 118.5 | 27.5 | 38    | 12   | 26   | 51    |
| 13440 | 79    | 105   | 35   | 167   | 36   | 132   | 19   | 71.5 | 97    |



|       |      |       |      |       |       |       |      |      |       |
|-------|------|-------|------|-------|-------|-------|------|------|-------|
| 13441 | 42   | 40    | 25   | 139   | 28    | 38.5  | 13   | 33.5 | 49    |
| 13442 | 45   | 42    | 24   | 129   | 37    | 50    | 11   | 31   | 49    |
| 13443 | 62   | 86    | 29   | 178   | 48    | 69    | 28   | 46.5 | 96    |
| 13444 | 32   | 26    | 20   | 83    | 22    | 21    | 10   | 21   | 27.5  |
| 13445 | 43   | 43    | 31   | 98.5  | 42    | 44    | 13.5 | 29   | 43.5  |
| 13446 | 33   | 20    | 13.5 | 83    | 35    | 19.5  | 7    | 28   | 34.5  |
| 13447 | 91.5 | 122.5 | 37.5 | 217.5 | 62    | 159   | 20   | 90   | 120   |
| 13448 | 32   | 22    | 17   | 74    | 124.5 | 18    | 9    | 20   | 40    |
| 13449 | 78   | 106   | 36   | 178   | 155.5 | 120.5 | 26   | 69   | 104.5 |
| 13450 | 20.5 | 17    | 12   | 59    | 14    | 15    | 7    | 15   | 35    |
| 13451 | 90   | 128   | 42   | 202.5 | 45    | 148   | 29   | 78   | 144   |
| 13452 | 42   | 48    | 26   | 125   | 29    | 48    | 16.5 | 34   | 73    |
| 13453 | 85   | 78    | 32   | 161   | 28    | 106   | 16   | 56.5 | 77    |
| 13454 | 50   | 47    | 24   | 145   | 25.5  | 55    | 15   | 42   | 56    |
| 13455 | 44   | 40    | 24.5 | 98    | 24    | 39.5  | 12   | 28   | 51.5  |
| 13456 | 32.5 | 27    | 15   | 86.5  | 33    | 25    | 11   | 18   | 42    |
| 13457 | 13   | 8     | 6    | 28.5  | 21    | 7     | 3    | 8    | 8     |
| 13458 | 72.5 | 118   | 35   | 175   | 77    | 135   | 20   | 73   | 87    |
| 13459 | 22.5 | 16    | 11   | 38    | 13    | 13.5  | 7.5  | 13   | 24.5  |
| 13460 | 16   | 10    | 9    | 36    | 12    | 8     | 5    | 9    | 16    |
| 13461 | 81   | 130   | 37   | 197   | 42.5  | 156   | 25   | 84   | 110.5 |
| 13462 | 43   | 35    | 26   | 125   | 40    | 39    | 10   | 26.5 | 54    |
| 13463 | 69.5 | 76    | 35   | 151.5 | 87    | 82.5  | 27   | 54   | 99.5  |
| 13464 | 39   | 49    | 21   | 114   | 16    | 56    | 11   | 43.5 | 41    |
| 13465 | 44.5 | 46    | 24   | 127   | 19    | 61    | 11   | 36   | 81    |
| 13466 | 33   | 20    | 16   | 68    | 13    | 14    | 7    | 43   | 27    |
| 13467 | 45   | 28    | 13   | 65.5  | 16    | 22    | 10   | 22.5 | 27    |
| 13468 | 40   | 30    | 16   | 78    | 17    | 26    | 9    | 17   | 48.5  |
| 13469 | 25   | 15    | 16   | 47    | 10    | 18    | 5    | 11.5 | 41    |
| 13470 | 117  | 41    | 29   | 144   | 90.5  | 55    | 11   | 33   | 79    |
| 13471 | 56   | 70    | 30.5 | 142   | 39    | 69    | 20   | 49   | 64    |
| 13472 | 48   | 62    | 31   | 135.5 | 29    | 61    | 15   | 39   | 86    |
| 13473 | 45.5 | 60    | 26   | 141   | 25    | 60.5  | 14   | 34   | 49    |
| 13474 | 43   | 34    | 19   | 104.5 | 19    | 32    | 10   | 35   | 46    |
| 13475 | 52   | 50    | 23   | 131   | 23    | 62.5  | 12   | 36.5 | 42    |
| 13476 | 42.5 | 42    | 23   | 110.5 | 67.5  | 30    | 16   | 30.5 | 45    |
| 13477 | 49   | 49    | 30   | 146   | 31    | 52    | 16   | 44   | 59    |
| 13478 | 50   | 58.5  | 30   | 125   | 23    | 65    | 17   | 39   | 62    |
| 13479 | 54   | 65    | 27   | 153   | 35    | 71    | 15.5 | 45   | 66    |
| 13480 | 71   | 91    | 34   | 195   | 88    | 93    | 27   | 57   | 90.5  |
| 13481 | 69   | 63    | 29   | 157   | 42    | 66    | 16   | 44   | 70.5  |
| 13482 | 37.5 | 43    | 20   | 105   | 21    | 56    | 16   | 33   | 82    |
| 13483 | 55   | 53    | 28.5 | 134   | 30    | 80    | 11   | 69   | 86.5  |
| 13484 | 35.5 | 39    | 19   | 65.5  | 43.5  | 58    | 8    | 31   | 276   |
| 13485 | 36.5 | 41    | 19   | 67    | 14    | 66    | 7    | 28   | 32    |
| 13486 | 54   | 56    | 33   | 188.5 | 26    | 78    | 23   | 76   | 87.5  |
| 13487 | 50   | 46    | 25   | 151   | 39.5  | 71.5  | 12   | 52   | 44    |

|       |       |       |      |       |      |       |      |      |       |
|-------|-------|-------|------|-------|------|-------|------|------|-------|
| 13488 | 49    | 38    | 24   | 134.5 | 19   | 57    | 19   | 43   | 155   |
| 13489 | 60    | 36.5  | 22   | 81.5  | 15   | 53    | 9    | 34   | 47    |
| 13490 | 42    | 48    | 22   | 96    | 19   | 69    | 11.5 | 35   | 50    |
| 13491 | 59    | 55    | 25   | 117   | 21   | 79    | 11   | 57   | 45    |
| 13492 | 47.5  | 48    | 28   | 99.5  | 26   | 67    | 9    | 37.5 | 46    |
| 13493 | 47    | 42.5  | 24   | 95    | 19   | 65    | 9    | 30   | 33    |
| 13494 | 46.5  | 37    | 17   | 57    | 15   | 48    | 7    | 28   | 27    |
| 13495 | 68.5  | 97    | 33   | 151   | 29.5 | 147   | 15   | 69   | 109.5 |
| 13496 | 76.5  | 138   | 38   | 183   | 35.5 | 149   | 27.5 | 81   | 134   |
| 13497 | 90    | 124   | 35   | 182.5 | 33   | 158   | 20   | 75   | 94    |
| 13498 | 76.5  | 110   | 35   | 207.5 | 33.5 | 144   | 19   | 75   | 103   |
| 13499 | 61.5  | 96    | 32   | 148   | 26   | 140.5 | 15   | 66   | 111   |
| 13500 | 93.5  | 139   | 40   | 184   | 38   | 139.5 | 31   | 86   | 157   |
| 13501 | 85    | 112   | 35   | 185   | 31   | 146   | 20   | 75   | 90    |
| 13502 | 70    | 100   | 34   | 175   | 34   | 138   | 18   | 68   | 90    |
| 13503 | 73.5  | 100   | 42   | 169   | 28   | 134.5 | 19   | 66   | 85    |
| 13504 | 70    | 100   | 32.5 | 150   | 32   | 145   | 19   | 77   | 80    |
| 13505 | 71    | 110   | 36.5 | 162.5 | 34   | 135.5 | 24   | 66   | 89.5  |
| 13506 | 75    | 118.5 | 36   | 206.5 | 32.5 | 145.5 | 23   | 76.5 | 96.5  |
| 13507 | 70    | 103   | 41   | 177.5 | 42   | 135   | 16   | 68   | 95    |
| 13508 | 73.5  | 102   | 36   | 205.5 | 184  | 145   | 20   | 69   | 91    |
| 13509 | 81    | 83    | 34   | 143.5 | 37   | 141   | 13   | 64   | 94    |
| 13510 | 77    | 107   | 35.5 | 170   | 33.5 | 146   | 21   | 68   | 77    |
| 13511 | 79    | 112   | 32   | 159   | 46   | 146.5 | 20   | 75   | 91.5  |
| 13512 | 72.5  | 118   | 35   | 178.5 | 34   | 144.5 | 21   | 68.5 | 108   |
| 13513 | 134.5 | 88    | 28   | 196.5 | 63.5 | 144   | 12   | 64   | 88    |
| 13514 | 81    | 103   | 39   | 236   | 37   | 146   | 17   | 73   | 116   |
| 13515 | 71.5  | 97    | 29   | 159   | 28   | 121.5 | 19   | 60   | 78    |
| 13516 | 72    | 98    | 30   | 141   | 35   | 124   | 19   | 66   | 88    |
| 13517 | 57    | 75    | 28   | 154.5 | 26   | 108   | 14   | 52.5 | 91    |
| 13518 | 83    | 141   | 37   | 204   | 40   | 155   | 29   | 79   | 110   |
| 13519 | 58    | 89    | 30   | 164   | 26   | 125   | 15   | 69   | 97    |
| 13520 | 69    | 105   | 35   | 150.5 | 28   | 125   | 21   | 66   | 75    |
| 13521 | 61    | 72    | 27   | 135   | 28   | 102   | 14   | 52   | 69    |
| 13522 | 75    | 93    | 31   | 190   | 44   | 103.5 | 24   | 60   | 109   |
| 13523 | 64.5  | 90    | 32   | 150   | 29   | 131   | 16   | 61   | 108   |
| 13524 | 67    | 101   | 34   | 142   | 30   | 133   | 18.5 | 68   | 106   |
| 13525 | 72    | 111   | 67   | 163.5 | 36   | 147   | 19   | 74   | 88    |
| 13526 | 64.5  | 91    | 52   | 165   | 32.5 | 115.5 | 16   | 65   | 90    |
| 13527 | 61    | 90    | 33.5 | 174   | 36   | 119.5 | 16   | 65   | 105   |
| 13528 | 76    | 117   | 42   | 192   | 41.5 | 131   | 24   | 67   | 169   |
| 13529 | 88    | 121   | 40   | 175   | 33   | 231   | 25   | 117  | 140   |
| 13530 | 63    | 85    | 30   | 152   | 27   | 126   | 24   | 57   | 77    |
| 13531 | 70    | 96.5  | 34   | 144.5 | 27   | 131   | 20   | 66   | 75    |
| 13532 | 62    | 96    | 35   | 149   | 24   | 137.5 | 12   | 65   | 80    |
| 13533 | 53.5  | 78    | 33   | 128   | 23   | 116.5 | 12   | 57   | 90    |
| 13534 | 60    | 79    | 28   | 125.5 | 25   | 113.5 | 11   | 56   | 80    |

|       |      |      |      |       |      |       |      |      |       |
|-------|------|------|------|-------|------|-------|------|------|-------|
| 13535 | 64.5 | 91   | 28   | 170.5 | 23   | 115   | 14   | 56   | 82    |
| 13536 | 81   | 122  | 32   | 154   | 36   | 138.5 | 28   | 70   | 141.5 |
| 13537 | 65   | 111  | 31.5 | 173   | 31   | 126   | 21   | 67   | 120   |
| 13538 | 53.5 | 82   | 28   | 129   | 21   | 115   | 14   | 56.5 | 67.5  |
| 13539 | 70   | 101  | 28   | 131   | 24   | 139   | 15   | 62.5 | 101   |
| 13540 | 61   | 97   | 32   | 141   | 26   | 134   | 18   | 68   | 123   |
| 13541 | 60   | 98   | 30   | 164.5 | 28   | 126   | 17   | 63   | 84    |
| 13542 | 73.5 | 94   | 34   | 157.5 | 29.5 | 145   | 16   | 64   | 86    |
| 13543 | 72.5 | 109  | 38   | 179.5 | 32   | 116   | 27   | 67   | 126   |
| 13544 | 66.5 | 102  | 35.5 | 181   | 35   | 121   | 23   | 64   | 99.5  |
| 13545 | 69   | 72   | 33   | 144   | 25   | 98    | 16.5 | 47   | 81    |
| 13546 | 51   | 69   | 27   | 166   | 19   | 105.5 | 11   | 70.5 | 62.5  |
| 13547 | 48   | 74   | 20   | 83.5  | 14   | 115   | 8    | 48   | 45    |
| 13548 | 54   | 83.5 | 27   | 109   | 18.5 | 126   | 9    | 56   | 59    |
| 13549 | 46   | 71   | 21   | 121   | 16   | 109   | 13.5 | 48   | 51    |
| 13550 | 45   | 72   | 20   | 108   | 15   | 96    | 7    | 43.5 | 48    |
| 13551 | 48   | 61   | 23   | 97    | 17   | 94.5  | 9    | 44   | 43    |
| 13552 | 49.5 | 65   | 25   | 135   | 17   | 109   | 9    | 51   | 54    |
| 13553 | 58.5 | 77   | 27   | 163   | 20   | 114   | 9    | 64   | 52    |
| 13554 | 46   | 74   | 21   | 82    | 16   | 117.5 | 8    | 53   | 49.5  |
| 13555 | 63   | 78   | 25   | 126   | 18   | 119   | 10   | 66.5 | 55    |
| 13556 | 74   | 68   | 26   | 167   | 20   | 95    | 17   | 55   | 49    |
| 13557 | 45.5 | 66   | 20.5 | 127   | 16   | 110   | 12   | 45   | 45    |
| 13558 | 54   | 70   | 28.5 | 194   | 20   | 109   | 12   | 53   | 53    |
| 13559 | 48   | 63   | 23   | 109   | 18   | 99.5  | 10   | 55   | 41    |
| 13560 | 49   | 68   | 30   | 122   | 18   | 98    | 12   | 52   | 47    |
| 13561 | 52   | 61.5 | 27   | 165   | 22   | 106   | 9    | 55   | 135   |
| 13562 | 50.5 | 66.5 | 30   | 148   | 17   | 107   | 12   | 55   | 54    |
| 13563 | 51.5 | 84.5 | 23   | 67.5  | 15   | 129   | 9    | 59   | 56    |
| 13564 | 50   | 77   | 22   | 79    | 17   | 128   | 7    | 51.5 | 55    |
| 13565 | 66   | 95   | 33   | 156   | 30.5 | 131.5 | 18   | 72   | 66.5  |
| 13566 | 54   | 80   | 25   | 146.5 | 32   | 131   | 10   | 60   | 59    |
| 13567 | 56.5 | 73   | 27   | 141.5 | 20   | 110   | 12.5 | 57   | 69    |
| 13568 | 56.5 | 77   | 24   | 92    | 22   | 118   | 10   | 59   | 56    |
| 13569 | 54   | 85.5 | 24   | 92    | 17   | 133.5 | 8    | 56   | 59    |
| 13570 | 49   | 67   | 23   | 82    | 28   | 120.5 | 11   | 51   | 49    |
| 13571 | 52   | 53   | 21   | 77    | 17   | 70    | 10   | 47.5 | 50    |
| 13572 | 42   | 67.5 | 22.5 | 62    | 12   | 100.5 | 10   | 50   | 50    |
| 13573 | 46   | 59   | 21   | 84    | 17   | 86    | 13   | 40   | 42    |
| 13574 | 56   | 83   | 32   | 162.5 | 23   | 129   | 10.5 | 72   | 205   |
| 13575 | 67   | 85   | 64   | 198   | 52.5 | 117   | 14   | 70   | 73.5  |
| 13576 | 71   | 65.5 | 29   | 98.5  | 26   | 126   | 25   | 56   | 112   |
| 13577 | 37   | 64   | 18   | 61    | 13   | 92.5  | 10   | 41   | 47    |
| 13578 | 49.5 | 67.5 | 24   | 64    | 15   | 93    | 9    | 49   | 120   |
| 13579 | 40   | 58   | 19   | 89    | 18   | 101   | 8    | 44   | 45    |
| 13580 | 43.5 | 55   | 19   | 74    | 11   | 92    | 6    | 42   | 39    |
| 13581 | 39   | 61   | 16   | 66.5  | 13   | 88    | 7    | 35.5 | 36    |

|       |      |      |      |       |      |       |      |      |       |
|-------|------|------|------|-------|------|-------|------|------|-------|
| 13582 | 54   | 71   | 23   | 134   | 16.5 | 117   | 10   | 53   | 48    |
| 13583 | 63   | 85   | 30   | 154   | 19   | 134   | 16   | 64.5 | 60    |
| 13584 | 82   | 103  | 50   | 151   | 30   | 114   | 25   | 102  | 172   |
| 13585 | 38   | 64   | 23   | 54.5  | 28   | 89    | 9    | 45   | 55    |
| 13586 | 54   | 59   | 26   | 59    | 14   | 85    | 12   | 38   | 32    |
| 13587 | 157  | 64.5 | 20   | 71    | 17   | 90    | 7.5  | 43   | 56.5  |
| 13588 | 53   | 71   | 24   | 133   | 64.5 | 100   | 18   | 61.5 | 51    |
| 13589 | 53.5 | 62   | 21   | 65    | 49.5 | 92.5  | 11   | 42.5 | 41.5  |
| 13590 | 52   | 67   | 27   | 96.5  | 45   | 98    | 10   | 47.5 | 60    |
| 13591 | 86.5 | 73   | 25   | 142   | 21   | 107   | 11   | 60   | 93.5  |
| 13592 | 38   | 56   | 22   | 55    | 15   | 89    | 7    | 37   | 34.5  |
| 13593 | 46   | 70   | 20   | 68    | 12   | 94.5  | 7    | 41   | 49    |
| 13594 | 51   | 68   | 20   | 84.5  | 13   | 99    | 7    | 48   | 42    |
| 13595 | 57   | 69   | 26   | 128   | 23   | 106   | 11   | 56.5 | 51    |
| 13596 | 60.5 | 65   | 20   | 93.5  | 14   | 103   | 7    | 46   | 44    |
| 13597 | 43   | 61   | 19   | 72.5  | 13   | 104   | 8    | 42   | 49    |
| 13598 | 45   | 63   | 21   | 109   | 15   | 99    | 9    | 44   | 43.5  |
| 13599 | 47   | 63   | 21   | 94.5  | 13   | 108   | 10   | 49   | 49    |
| 13600 | 46   | 69   | 20   | 65    | 16   | 119   | 8    | 44   | 44    |
| 13601 | 44   | 58   | 19   | 68    | 10   | 84    | 7    | 41   | 35    |
| 13602 | 47.5 | 58   | 20   | 99    | 15   | 101   | 8    | 43   | 42.5  |
| 13603 | 44   | 55.5 | 21   | 98    | 13   | 82    | 8    | 55.5 | 47    |
| 13604 | 44   | 59.5 | 19   | 95    | 12   | 90    | 9    | 41   | 43.5  |
| 13605 | 50   | 67   | 21   | 138   | 20   | 101   | 8    | 44   | 65    |
| 13606 | 46.5 | 75   | 22.5 | 86    | 15   | 118.5 | 7    | 52.5 | 55.5  |
| 13607 | 47   | 75   | 21   | 84    | 18   | 102   | 10   | 50   | 43    |
| 13608 | 42   | 61.5 | 21   | 102   | 16.5 | 95    | 8    | 38.5 | 57.5  |
| 13609 | 63   | 62   | 20   | 54    | 14   | 90    | 8    | 44   | 38    |
| 13610 | 46   | 72.5 | 20   | 92.5  | 15.5 | 108   | 7    | 45   | 61    |
| 13611 | 43.5 | 60.5 | 21   | 96.5  | 31   | 85    | 10   | 45   | 147.5 |
| 13612 | 38   | 55   | 49   | 63    | 17   | 90    | 7    | 57   | 47    |
| 13613 | 56.5 | 66   | 23   | 136.5 | 14   | 97    | 8    | 52   | 56    |
| 13614 | 59   | 81   | 21   | 116.5 | 16   | 131   | 9    | 50.5 | 55    |
| 13615 | 52.5 | 82   | 20   | 75    | 390  | 122   | 8    | 56   | 51    |
| 13616 | 47   | 67   | 23   | 97    | 15   | 93.5  | 10   | 59   | 60    |
| 13617 | 50   | 77.5 | 26.5 | 120   | 30   | 91    | 13   | 59.5 | 71.5  |
| 13618 | 49   | 66   | 22   | 101   | 23   | 84.5  | 10   | 44   | 59    |
| 13619 | 58   | 82.5 | 30   | 148   | 41   | 108   | 16   | 54.5 | 97    |
| 13620 | 49   | 73   | 25   | 101.5 | 22   | 97    | 13   | 51   | 68    |
| 13621 | 55   | 87   | 27   | 145.5 | 30   | 109   | 18   | 57   | 79    |
| 13622 | 62   | 81   | 27.5 | 137.5 | 23   | 113   | 12   | 56   | 94    |
| 13623 | 59   | 79.5 | 30   | 136   | 23   | 100.5 | 14.5 | 57   | 106   |
| 13624 | 61   | 73   | 25   | 127   | 31   | 103   | 12   | 57   | 64    |
| 13625 | 61   | 99   | 30   | 126   | 28   | 114.5 | 18.5 | 60.5 | 103   |
| 13626 | 54.5 | 73   | 29   | 126   | 24   | 104   | 12   | 58   | 114.5 |
| 13627 | 61   | 84   | 27   | 137   | 35   | 110   | 17   | 53   | 143   |
| 13628 | 41   | 57   | 21   | 57    | 12   | 82    | 8    | 39.5 | 65    |

|       |       |       |      |       |      |       |      |      |       |
|-------|-------|-------|------|-------|------|-------|------|------|-------|
| 13629 | 61    | 88.5  | 26.5 | 130   | 31   | 109   | 20   | 56   | 74    |
| 13630 | 57    | 78.5  | 27   | 149.5 | 26   | 114   | 12   | 51.5 | 141   |
| 13631 | 40    | 65    | 21   | 91    | 13   | 87    | 9    | 39   | 51    |
| 13632 | 63    | 83    | 28   | 148.5 | 19   | 113   | 26   | 61   | 107   |
| 13633 | 94    | 82    | 25   | 120   | 25   | 104   | 15   | 50   | 67    |
| 13634 | 50    | 61    | 25   | 111   | 25   | 93.5  | 10   | 47   | 69    |
| 13635 | 62    | 87    | 26   | 117   | 147  | 117   | 16   | 61.5 | 76.5  |
| 13636 | 56    | 81.5  | 23   | 111   | 18   | 121   | 11   | 48.5 | 71.5  |
| 13637 | 63.5  | 81    | 27   | 168   | 35   | 111.5 | 20   | 56   | 73    |
| 13638 | 68    | 90    | 35   | 166   | 27   | 118   | 25   | 71   | 87    |
| 13639 | 44    | 67.5  | 21   | 119   | 16   | 84    | 11   | 44   | 47.5  |
| 13640 | 52    | 70    | 23   | 125.5 | 16.5 | 111.5 | 10   | 47   | 74    |
| 13641 | 62    | 80    | 26   | 116   | 26   | 98    | 17   | 54   | 92    |
| 13642 | 50.5  | 74    | 23   | 104   | 20.5 | 104.5 | 11   | 51   | 80    |
| 13643 | 63.5  | 91    | 24   | 102   | 22   | 121   | 14   | 59   | 70    |
| 13644 | 57    | 83    | 28   | 125   | 21   | 114   | 19   | 54.5 | 109.5 |
| 13645 | 58    | 76    | 24   | 138.5 | 375  | 102   | 13   | 49   | 57    |
| 13646 | 57    | 83    | 27.5 | 155.5 | 25   | 109   | 17   | 57   | 89.5  |
| 13647 | 61    | 101.5 | 30   | 178   | 28   | 117   | 18   | 58   | 90    |
| 13648 | 55    | 89    | 20   | 101   | 18   | 103   | 12   | 49   | 83    |
| 13649 | 62.5  | 78    | 31   | 134   | 16   | 126   | 11   | 49.5 | 57    |
| 13650 | 60    | 94    | 27.5 | 94.5  | 21   | 107   | 17   | 62   | 66.5  |
| 13651 | 50    | 72    | 23   | 144   | 19   | 112   | 13   | 51   | 108   |
| 13652 | 58    | 80    | 37   | 140   | 25   | 111   | 13   | 56   | 67    |
| 13653 | 74.5  | 89    | 37   | 149.5 | 40   | 140.5 | 16   | 67   | 91    |
| 13654 | 88.5  | 122   | 47   | 228.5 | 51.5 | 151   | 25.5 | 82   | 106   |
| 13655 | 93    | 130.5 | 43   | 188   | 45.5 | 157   | 26   | 79   | 156   |
| 13656 | 92.5  | 130   | 44   | 195   | 46   | 161   | 26   | 80   | 157   |
| 13657 | 113   | 136.5 | 42   | 187.5 | 50   | 160.5 | 25   | 77.5 | 136.5 |
| 13658 | 80    | 115   | 41   | 167.5 | 41   | 146   | 20   | 82   | 105   |
| 13659 | 148   | 142   | 45   | 196   | 47   | 156   | 31   | 82   | 112.5 |
| 13660 | 103   | 124   | 46   | 253   | 48   | 154.5 | 31   | 81   | 129   |
| 13661 | 100.5 | 123   | 48   | 253   | 49.5 | 143.5 | 28   | 82.5 | 116   |
| 13662 | 93.5  | 139   | 52   | 190.5 | 83   | 154   | 35   | 106  | 114.5 |
| 13663 | 345   | 170   | 41   | 201.5 | 46   | 271   | 31   | 91.5 | 209   |
| 13664 | 71    | 95    | 30   | 122   | 31.5 | 135   | 13   | 67   | 65.5  |
| 13665 | 74.5  | 93    | 36   | 106.5 | 31   | 122.5 | 16   | 56   | 69    |
| 13666 | 72    | 97    | 53   | 146   | 38   | 133.5 | 16   | 61.5 | 73    |
| 13667 | 120.5 | 90    | 26   | 91    | 32   | 132   | 114  | 59   | 65    |
| 13668 | 59    | 87    | 33   | 90    | 87   | 133   | 182  | 53   | 61    |
| 13669 | 72    | 86    | 38.5 | 125   | 70   | 136   | 13   | 58   | 99    |
| 13670 | 80    | 80    | 35   | 145   | 35   | 125   | 16   | 59   | 139.5 |
| 13671 | 72    | 82    | 31   | 127   | 23   | 131   | 10   | 55   | 95.5  |
| 13672 | 92    | 100   | 58   | 518   | 246  | 128   | 27   | 88.5 | 124   |
| 13673 | 75    | 86    | 33   | 118.5 | 92   | 130   | 12   | 57.5 | 70    |
| 13674 | 61    | 79    | 44.5 | 191.5 | 34   | 127   | 19.5 | 66   | 74.5  |
| 13675 | 72    | 86    | 27   | 93    | 24   | 125.5 | 11   | 52   | 74    |

|       |       |       |       |       |       |       |      |      |       |
|-------|-------|-------|-------|-------|-------|-------|------|------|-------|
| 13676 | 72    | 84    | 54    | 122   | 26    | 130   | 18   | 58   | 109.5 |
| 13677 | 108   | 89    | 673.5 | 111.5 | 36    | 141   | 19   | 60.5 | 75    |
| 13678 | 62    | 77    | 35    | 143   | 39    | 111.5 | 15   | 59   | 62    |
| 13679 | 66    | 81    | 31    | 125.5 | 34    | 131   | 11   | 76   | 68.5  |
| 13680 | 57    | 81.5  | 30    | 122   | 27    | 122.5 | 9    | 57   | 61    |
| 13681 | 74    | 109.5 | 38    | 177   | 35.5  | 135   | 24   | 66   | 103   |
| 13682 | 99    | 119.5 | 39    | 161   | 37    | 136.5 | 20   | 73   | 103   |
| 13683 | 74    | 98    | 35    | 139   | 32    | 125   | 17.5 | 62.5 | 87    |
| 13684 | 278   | 133   | 45    | 173   | 66    | 139   | 28   | 78   | 98    |
| 13685 | 77    | 105   | 35.5  | 158.5 | 37    | 133.5 | 23   | 64   | 111   |
| 13686 | 89.5  | 116   | 41    | 173.5 | 67    | 140.5 | 19   | 67   | 104.5 |
| 13687 | 64    | 94    | 33    | 98    | 39    | 125   | 9.5  | 56   | 99    |
| 13688 | 73    | 105   | 35    | 145   | 35    | 134   | 19   | 63   | 82    |
| 13689 | 96    | 95    | 37    | 158   | 35    | 131   | 19   | 71   | 93    |
| 13690 | 77.5  | 101   | 33    | 178   | 33    | 130   | 17   | 63.5 | 80    |
| 13691 | 80    | 86    | 33    | 137   | 28.5  | 129   | 15.5 | 63   | 100.5 |
| 13692 | 73    | 109   | 38    | 134.5 | 39    | 137   | 21   | 61   | 85    |
| 13693 | 85.5  | 113   | 35.5  | 182   | 41    | 135   | 23   | 66.5 | 103   |
| 13694 | 77    | 100   | 36    | 144.5 | 40    | 140   | 18   | 64   | 116   |
| 13695 | 73    | 128.5 | 44.5  | 168.5 | 38    | 152.5 | 26.5 | 71   | 164.5 |
| 13696 | 114   | 101.5 | 43    | 134.5 | 47    | 149   | 16   | 69   | 81.5  |
| 13697 | 69.5  | 102   | 33    | 150   | 37    | 125   | 19.5 | 59   | 110   |
| 13698 | 68    | 102   | 33    | 144   | 35    | 127   | 19   | 60   | 95.5  |
| 13699 | 76    | 82    | 35    | 140   | 30    | 122   | 15   | 71   | 81    |
| 13700 | 67.5  | 80    | 34    | 215.5 | 26.5  | 127   | 15   | 62.5 | 100.5 |
| 13701 | 58    | 81    | 30    | 88.5  | 21.5  | 118   | 10   | 53.5 | 62.5  |
| 13702 | 73    | 79    | 32    | 164   | 31    | 131   | 23   | 57.5 | 64    |
| 13703 | 50    | 77    | 27    | 86.5  | 23    | 114.5 | 9    | 46   | 56    |
| 13704 | 55.5  | 82    | 26    | 103   | 84    | 110   | 10   | 54   | 58    |
| 13705 | 63    | 78    | 28    | 161   | 20.5  | 112.5 | 11   | 45   | 90    |
| 13706 | 56    | 74    | 27    | 98.5  | 22    | 115   | 8    | 54   | 56    |
| 13707 | 98    | 94    | 42    | 197.5 | 36    | 141   | 14   | 66   | 131   |
| 13708 | 69    | 88.5  | 34    | 178   | 33    | 127   | 13   | 60   | 119   |
| 13709 | 79    | 86    | 28    | 87    | 65    | 138   | 26   | 52   | 66    |
| 13710 | 91    | 83    | 31.5  | 185.5 | 49    | 129   | 17   | 69   | 127   |
| 13711 | 104.5 | 78    | 32    | 75.5  | 33    | 107.5 | 17   | 74   | 162   |
| 13712 | 143.5 | 72    | 31    | 82    | 31    | 113   | 19   | 52   | 78    |
| 13713 | 106.5 | 83    | 75.5  | 103.5 | 67    | 162.5 | 12   | 57   | 93    |
| 13714 | 72    | 78    | 31    | 135   | 51    | 119   | 29   | 55   | 75    |
| 13715 | 606   | 473   | 187.5 | 335   | 117.5 | 906   | 78.5 | 457  | 487   |
| 13716 | 57    | 78    | 25    | 73.5  | 39    | 118   | 9    | 49.5 | 59    |
| 13717 | 69.5  | 87    | 32    | 96    | 28    | 122   | 13   | 66   | 66    |
| 13718 | 116   | 104   | 40    | 90    | 43    | 173   | 11   | 65   | 87    |
| 13719 | 63    | 96    | 32    | 87    | 28    | 155   | 11   | 64   | 68    |
| 13720 | 69.5  | 92    | 32    | 119   | 26    | 144   | 10   | 69   | 72    |
| 13721 | 112   | 205   | 47    | 196   | 59    | 220   | 37   | 112  | 144   |
| 13722 | 92.5  | 144   | 39    | 173   | 102.5 | 162   | 20   | 86   | 130.5 |

|       |       |       |      |       |      |       |      |       |       |
|-------|-------|-------|------|-------|------|-------|------|-------|-------|
| 13723 | 96    | 156   | 37   | 167   | 54   | 175   | 26   | 88    | 120   |
| 13724 | 94    | 156.5 | 39   | 162   | 55.5 | 175   | 30   | 85.5  | 105   |
| 13725 | 103.5 | 158.5 | 49   | 197.5 | 46   | 178.5 | 25   | 100   | 114.5 |
| 13726 | 100   | 143   | 40   | 159.5 | 41   | 187.5 | 24   | 84    | 102   |
| 13727 | 82    | 141.5 | 38   | 200   | 54.5 | 181   | 22   | 86    | 124.5 |
| 13728 | 88    | 136   | 37   | 166   | 36   | 157   | 22   | 120   | 133   |
| 13729 | 78    | 139   | 38.5 | 160   | 31   | 164   | 16   | 80    | 93    |
| 13730 | 89.5  | 147   | 37   | 196.5 | 41   | 166   | 20   | 84    | 116.5 |
| 13731 | 108   | 172   | 45   | 190.5 | 59   | 221   | 32   | 104   | 136   |
| 13732 | 97    | 152   | 38   | 190   | 67   | 164.5 | 23   | 80    | 104   |
| 13733 | 88    | 130   | 36.5 | 166   | 39   | 163   | 16   | 88    | 98    |
| 13734 | 89    | 149   | 38   | 167   | 39   | 169   | 25   | 86    | 106   |
| 13735 | 87    | 135   | 40   | 170   | 39   | 161   | 23   | 85    | 103   |
| 13736 | 85    | 141   | 40   | 208.5 | 38   | 167   | 24.5 | 87    | 122   |
| 13737 | 89.5  | 149.5 | 37   | 186   | 468  | 165   | 22   | 85    | 105   |
| 13738 | 88    | 130   | 36   | 170.5 | 43   | 175   | 23   | 85.5  | 101   |
| 13739 | 83    | 131.5 | 38.5 | 156.5 | 49.5 | 148.5 | 22   | 75.5  | 111   |
| 13740 | 100   | 149   | 39   | 175   | 49   | 176   | 26   | 79    | 114   |
| 13741 | 91.5  | 132   | 37   | 169   | 51   | 166   | 23   | 77.5  | 99.5  |
| 13742 | 118.5 | 122   | 32   | 171   | 41   | 153.5 | 18   | 75    | 86    |
| 13743 | 100   | 125   | 39   | 213.5 | 58   | 159.5 | 20   | 83    | 121   |
| 13744 | 69.5  | 85.5  | 33   | 149   | 35.5 | 103   | 28   | 64.5  | 112.5 |
| 13745 | 74    | 131.5 | 37   | 159   | 34   | 153   | 25   | 77    | 130.5 |
| 13746 | 88    | 121   | 40   | 190   | 46   | 146   | 18   | 78.5  | 94.5  |
| 13747 | 68    | 107   | 30   | 198   | 24   | 148   | 16   | 77    | 76    |
| 13748 | 65    | 99    | 29   | 176   | 36   | 145   | 11   | 69    | 111   |
| 13749 | 61    | 121   | 27   | 139   | 26   | 152   | 15   | 68    | 82    |
| 13750 | 233   | 111   | 31   | 162.5 | 37   | 145   | 11   | 71    | 93.5  |
| 13751 | 87.5  | 125   | 41   | 309   | 32.5 | 169   | 18   | 141   | 142   |
| 13752 | 82    | 121   | 30   | 157   | 35   | 158   | 16   | 79    | 83    |
| 13753 | 204   | 105.5 | 31   | 115   | 25   | 149   | 11   | 73    | 90    |
| 13754 | 85    | 85    | 35   | 274   | 27.5 | 112.5 | 32   | 122   | 66    |
| 13755 | 56    | 79    | 33   | 171   | 30   | 112   | 13   | 97    | 57    |
| 13756 | 59    | 110   | 25   | 110   | 42   | 146.5 | 9    | 82.5  | 85    |
| 13757 | 58    | 102.5 | 24   | 80    | 496  | 139.5 | 10   | 66.5  | 72    |
| 13758 | 74.5  | 91    | 29   | 120.5 | 25   | 134   | 10   | 56    | 87    |
| 13759 | 95    | 110   | 31   | 185.5 | 53.5 | 169   | 13   | 79    | 125   |
| 13760 | 169   | 146   | 64   | 185   | 38.5 | 151.5 | 38   | 104.5 | 113   |
| 13761 | 69    | 93    | 32   | 175.5 | 24.5 | 139   | 11   | 75    | 86    |
| 13762 | 55    | 87    | 26   | 89.5  | 26   | 120   | 9    | 49    | 56    |
| 13763 | 62    | 100   | 23   | 114.5 | 21   | 139   | 10   | 67.5  | 60    |
| 13764 | 57    | 101   | 24   | 86.5  | 20   | 154   | 9    | 66    | 66    |
| 13765 | 57.5  | 102.5 | 24   | 98    | 23   | 151   | 9    | 61.5  | 71    |
| 13766 | 103.5 | 97    | 25.5 | 104.5 | 47.5 | 141   | 11   | 81    | 59.5  |
| 13767 | 77    | 111   | 30.5 | 131   | 431  | 161   | 13   | 68    | 128   |
| 13768 | 132   | 99.5  | 33   | 105   | 53   | 135   | 16   | 67.5  | 77    |
| 13769 | 73    | 97    | 27   | 88    | 30   | 137   | 10   | 65    | 69.5  |

|       |       |       |      |       |      |       |      |      |       |
|-------|-------|-------|------|-------|------|-------|------|------|-------|
| 13770 | 2079  | 591.5 | 47.5 | 142   | 62   | 3280  | 24   | 626  | 760   |
| 13771 | 84.5  | 97    | 28   | 103   | 22   | 138   | 11   | 63   | 66.5  |
| 13772 | 70    | 99.5  | 27   | 136   | 47.5 | 129.5 | 23   | 64   | 61.5  |
| 13773 | 63.5  | 92    | 24   | 88    | 31   | 138   | 14   | 68   | 60    |
| 13774 | 127   | 86    | 30   | 96    | 65.5 | 130.5 | 17   | 70   | 78    |
| 13775 | 59    | 91    | 28   | 155   | 23   | 143.5 | 11   | 68   | 73    |
| 13776 | 66    | 95    | 32   | 210   | 27   | 139.5 | 13   | 84   | 69    |
| 13777 | 55.5  | 94    | 24   | 72.5  | 19   | 126   | 9    | 56   | 57    |
| 13778 | 51    | 87    | 19   | 70    | 16   | 130   | 8    | 51   | 55    |
| 13779 | 52    | 92.5  | 21.5 | 76.5  | 17   | 139   | 8    | 54.5 | 61    |
| 13780 | 52    | 94    | 26   | 124   | 23   | 143   | 9    | 60   | 60    |
| 13781 | 54    | 88    | 21   | 115   | 20.5 | 128   | 9    | 58.5 | 58    |
| 13782 | 52    | 89.5  | 24   | 88    | 18   | 128   | 9    | 54   | 58    |
| 13783 | 52    | 92    | 24   | 94    | 39   | 131   | 9    | 55   | 60.5  |
| 13784 | 104.5 | 96    | 27   | 122.5 | 23   | 143   | 11   | 71   | 66    |
| 13785 | 52.5  | 102   | 23   | 92.5  | 22   | 149   | 10   | 66   | 62    |
| 13786 | 67.5  | 94.5  | 24.5 | 99.5  | 21   | 136.5 | 10   | 63   | 63    |
| 13787 | 45    | 79    | 20   | 92.5  | 23   | 114   | 7    | 51   | 44.5  |
| 13788 | 46    | 82    | 51   | 89    | 26   | 110   | 12   | 46   | 53    |
| 13789 | 260   | 207   | 88   | 238.5 | 59.5 | 251   | 60   | 232  | 204   |
| 13790 | 176.5 | 93    | 32   | 103   | 34   | 144   | 28   | 94   | 78    |
| 13791 | 56    | 93.5  | 26   | 117.5 | 22   | 128   | 16   | 55.5 | 60.5  |
| 13792 | 76.5  | 94    | 25   | 78.5  | 25   | 119.5 | 10   | 54   | 64    |
| 13793 | 65    | 84    | 24   | 87    | 29   | 114   | 11.5 | 51   | 50    |
| 13794 | 66    | 98    | 39.5 | 129.5 | 32   | 127   | 12   | 69   | 61    |
| 13795 | 71    | 89    | 28   | 95    | 33   | 132   | 14   | 54.5 | 77    |
| 13796 | 59    | 84    | 29   | 87.5  | 23   | 128   | 11   | 60   | 66.5  |
| 13797 | 58.5  | 94    | 28   | 112   | 26   | 148   | 11   | 72.5 | 64    |
| 13798 | 52.5  | 93    | 24   | 88.5  | 20   | 134   | 8    | 54   | 57    |
| 13799 | 56    | 82    | 25   | 106   | 16   | 128   | 9    | 55   | 66.5  |
| 13800 | 49    | 91.5  | 20   | 78.5  | 22   | 127   | 8    | 51   | 62    |
| 13801 | 56    | 93    | 23   | 99.5  | 27.5 | 131.5 | 9    | 63   | 58    |
| 13802 | 60.5  | 84    | 40   | 105   | 31   | 125   | 17.5 | 57   | 70    |
| 13803 | 55.5  | 93    | 26   | 101   | 85   | 132.5 | 9.5  | 56   | 59    |
| 13804 | 66    | 96    | 23   | 137   | 20.5 | 126   | 10   | 62   | 54    |
| 13805 | 80    | 85    | 23   | 93.5  | 99   | 117   | 9    | 60   | 56    |
| 13806 | 283   | 92    | 32   | 159   | 31   | 146   | 12   | 72.5 | 105   |
| 13807 | 149   | 91    | 25   | 108   | 21   | 158   | 20   | 63   | 68    |
| 13808 | 69.5  | 100.5 | 30   | 163   | 32.5 | 132.5 | 16   | 63   | 67.5  |
| 13809 | 51    | 92    | 21   | 70    | 14   | 131.5 | 8    | 57   | 51    |
| 13810 | 46    | 89    | 21   | 65    | 14   | 115.5 | 8    | 46   | 53.5  |
| 13811 | 86    | 80    | 29   | 104   | 22   | 119   | 12   | 60   | 66    |
| 13812 | 100   | 99    | 26   | 142   | 31   | 125   | 12   | 62   | 85    |
| 13813 | 311   | 83    | 23   | 104   | 21   | 120   | 10   | 55.5 | 80    |
| 13814 | 84    | 135   | 33   | 207   | 33   | 159   | 24   | 80   | 106.5 |
| 13815 | 81.5  | 111   | 33   | 155   | 30   | 138   | 24   | 71   | 89    |
| 13816 | 77.5  | 119.5 | 33   | 202.5 | 36   | 142   | 24   | 76.5 | 79.5  |



|       |       |       |      |       |       |       |      |      |       |
|-------|-------|-------|------|-------|-------|-------|------|------|-------|
| 13817 | 74    | 129   | 32   | 173   | 37    | 150   | 23   | 71.5 | 87    |
| 13818 | 74    | 112   | 39   | 181.5 | 49.5  | 139.5 | 22   | 73.5 | 161   |
| 13819 | 85    | 133.5 | 37   | 180   | 42    | 127.5 | 25   | 69   | 109   |
| 13820 | 66    | 115   | 30   | 164   | 33    | 138.5 | 19   | 68   | 84    |
| 13821 | 113.5 | 141   | 32   | 190   | 36.5  | 148   | 25   | 70   | 108   |
| 13822 | 66    | 105   | 29   | 150   | 30    | 133.5 | 17   | 58.5 | 87    |
| 13823 | 75    | 117   | 30   | 141   | 29.5  | 155   | 19   | 75   | 86    |
| 13824 | 80    | 119.5 | 29   | 155   | 40    | 158   | 20   | 68.5 | 83.5  |
| 13825 | 81.5  | 129   | 36   | 149   | 39.5  | 142   | 31   | 78   | 88    |
| 13826 | 70    | 108   | 30   | 154   | 41    | 134   | 19   | 66   | 79    |
| 13827 | 79    | 124   | 33.5 | 168   | 139.5 | 145   | 22   | 72   | 97    |
| 13828 | 84    | 123   | 31   | 177   | 34    | 146.5 | 22   | 72   | 92    |
| 13829 | 83    | 142   | 38.5 | 186   | 47    | 144   | 31   | 78.5 | 125   |
| 13830 | 235.5 | 110.5 | 34   | 142   | 34    | 127.5 | 20   | 73   | 94    |
| 13831 | 73.5  | 138   | 35   | 181   | 41    | 146.5 | 27   | 75   | 130   |
| 13832 | 91    | 130   | 34   | 201   | 52    | 149.5 | 28.5 | 74   | 110   |
| 13833 | 63    | 111   | 30   | 150   | 29    | 144   | 16   | 60.5 | 100   |
| 13834 | 79    | 114   | 32   | 126   | 42    | 146   | 19   | 67   | 88    |
| 13835 | 73    | 112   | 33   | 153   | 34    | 131   | 22   | 63   | 166   |
| 13836 | 72    | 121.5 | 29   | 141   | 35    | 143.5 | 21   | 70   | 85    |
| 13837 | 94.5  | 151   | 39   | 160   | 39    | 169   | 31.5 | 85   | 115   |
| 13838 | 71.5  | 130   | 31   | 160   | 33    | 149.5 | 25   | 68   | 101   |
| 13839 | 65    | 111   | 29   | 154   | 31    | 129   | 19   | 63.5 | 102   |
| 13840 | 92.5  | 121   | 42   | 120   | 38    | 143   | 27   | 75   | 85    |
| 13841 | 99    | 135   | 37   | 180   | 35    | 167   | 41.5 | 91   | 135   |
| 13842 | 72    | 129   | 31.5 | 160   | 31    | 141   | 22   | 66   | 132   |
| 13843 | 69.5  | 117   | 29   | 123   | 27.5  | 136   | 16   | 62.5 | 79.5  |
| 13844 | 67.5  | 104   | 34   | 153   | 29    | 125   | 20   | 62   | 108   |
| 13845 | 80    | 138   | 32   | 210   | 36    | 151   | 29   | 74   | 113   |
| 13846 | 80    | 133   | 33   | 141   | 32    | 156   | 22   | 74.5 | 92    |
| 13847 | 73    | 114   | 26   | 126.5 | 31    | 134   | 23   | 65   | 99.5  |
| 13848 | 79    | 123   | 30   | 193   | 31    | 141   | 23   | 74   | 85    |
| 13849 | 82.5  | 119   | 40   | 145   | 34    | 142.5 | 21   | 65   | 114.5 |
| 13850 | 73.5  | 109   | 32   | 154   | 31    | 139   | 19   | 66   | 88.5  |
| 13851 | 71    | 120   | 37   | 140   | 30    | 153   | 18   | 79   | 96    |
| 13852 | 60    | 106.5 | 34   | 119.5 | 26    | 133   | 10   | 69.5 | 76    |
| 13853 | 83    | 113   | 38   | 185   | 126   | 126.5 | 16.5 | 150  | 71    |
| 13854 | 66    | 97    | 45   | 104   | 25    | 115   | 13   | 59.5 | 75    |
| 13855 | 140.5 | 113.5 | 33   | 90    | 29    | 138   | 11   | 75   | 66    |
| 13856 | 58    | 112   | 29.5 | 121   | 28    | 129.5 | 12   | 60   | 67    |
| 13857 | 142   | 170   | 48   | 229   | 55    | 207.5 | 34   | 153  | 127.5 |
| 13858 | 82    | 146   | 43   | 174   | 55    | 147   | 28   | 79   | 94    |
| 13859 | 74    | 130   | 42   | 126   | 38    | 136   | 22   | 97   | 89.5  |
| 13860 | 99.5  | 165   | 53   | 196.5 | 46    | 159   | 31   | 96   | 118.5 |
| 13861 | 72.5  | 120   | 38   | 149   | 36    | 129   | 20   | 77   | 79    |
| 13862 | 85    | 129   | 45   | 163   | 36    | 159   | 22   | 79   | 100   |
| 13863 | 115.5 | 123   | 36   | 162   | 37.5  | 132   | 21   | 75.5 | 86    |

|       |       |       |      |       |       |       |      |      |       |
|-------|-------|-------|------|-------|-------|-------|------|------|-------|
| 13864 | 77.5  | 129   | 38   | 156   | 47    | 142   | 28   | 83   | 92    |
| 13865 | 79    | 140   | 41   | 162.5 | 37    | 155.5 | 32   | 90.5 | 102   |
| 13866 | 80.5  | 132   | 37   | 161   | 35    | 130   | 21   | 84   | 97    |
| 13867 | 75.5  | 131   | 40   | 151   | 39    | 133.5 | 27   | 77.5 | 98    |
| 13868 | 85    | 139   | 41   | 175   | 37    | 137.5 | 27   | 77   | 116   |
| 13869 | 71.5  | 99    | 31   | 155.5 | 47    | 120   | 12   | 65   | 74    |
| 13870 | 103   | 142   | 42   | 205   | 42    | 148   | 26   | 78.5 | 96    |
| 13871 | 106   | 117   | 32.5 | 151   | 32    | 143   | 22   | 69   | 85.5  |
| 13872 | 72    | 130   | 41   | 174   | 50    | 145.5 | 28   | 80.5 | 97    |
| 13873 | 61    | 104   | 35   | 126.5 | 25    | 127   | 11.5 | 60.5 | 72    |
| 13874 | 62    | 102   | 35.5 | 141   | 30    | 129.5 | 12   | 67   | 101.5 |
| 13875 | 63    | 97.5  | 38   | 156   | 26.5  | 121   | 10   | 67   | 81.5  |
| 13876 | 65    | 102   | 34   | 176   | 31    | 131   | 14   | 74.5 | 126   |
| 13877 | 74    | 98.5  | 36   | 180   | 31    | 121.5 | 11   | 72   | 105   |
| 13878 | 57    | 101.5 | 32   | 150   | 656.5 | 132   | 11   | 68   | 100.5 |
| 13879 | 69.5  | 111   | 31   | 179.5 | 32    | 141.5 | 14.5 | 84.5 | 99    |
| 13880 | 60    | 103   | 34   | 149.5 | 51    | 123   | 12   | 64.5 | 82    |
| 13881 | 78.5  | 103   | 35   | 203   | 33    | 121   | 12   | 96.5 | 101   |
| 13882 | 61    | 93    | 34   | 179.5 | 33    | 137   | 10   | 71   | 75    |
| 13883 | 59    | 93    | 34   | 178   | 36    | 115   | 14   | 79   | 87    |
| 13884 | 67    | 98    | 33   | 154.5 | 31    | 125.5 | 11   | 77   | 73    |
| 13885 | 71    | 101   | 31   | 186   | 29    | 137   | 12   | 88.5 | 77    |
| 13886 | 59    | 87    | 33   | 145   | 777   | 106   | 10   | 61   | 81    |
| 13887 | 60    | 102   | 33   | 170   | 35    | 135   | 11   | 66.5 | 109.5 |
| 13888 | 58.5  | 89    | 35   | 183.5 | 29    | 118   | 11   | 57   | 72.5  |
| 13889 | 60    | 100   | 31   | 156   | 30    | 120.5 | 11   | 66   | 91    |
| 13890 | 63    | 90    | 35   | 184   | 26    | 118   | 11.5 | 85.5 | 129.5 |
| 13891 | 77    | 86.5  | 33   | 167   | 31.5  | 111   | 12   | 113  | 102.5 |
| 13892 | 83    | 95    | 33   | 173   | 37    | 109   | 12   | 79   | 73.5  |
| 13893 | 68    | 90.5  | 34   | 178.5 | 38    | 121   | 13   | 72.5 | 101.5 |
| 13894 | 55.5  | 81    | 32   | 150   | 199   | 112   | 12   | 69   | 83.5  |
| 13895 | 84.5  | 111   | 43   | 185   | 40    | 205   | 13   | 124  | 103.5 |
| 13896 | 54.5  | 89    | 31.5 | 188   | 38.5  | 117.5 | 12   | 60   | 78    |
| 13897 | 61.5  | 92    | 33   | 160   | 32    | 115   | 11   | 75   | 68    |
| 13898 | 54    | 85    | 27   | 103.5 | 25    | 112   | 9    | 55   | 85.5  |
| 13899 | 63.5  | 88    | 26   | 100   | 21    | 108   | 11   | 55   | 66    |
| 13900 | 75.5  | 96    | 33   | 102   | 23    | 121.5 | 10   | 59   | 85.5  |
| 13901 | 67.5  | 89.5  | 29   | 101.5 | 23.5  | 114   | 11.5 | 53   | 103   |
| 13902 | 170.5 | 139   | 27   | 121   | 20    | 243.5 | 11   | 76   | 229   |
| 13903 | 67    | 94.5  | 36   | 170   | 26    | 122   | 15   | 75.5 | 103   |
| 13904 | 74    | 95    | 30   | 142   | 34    | 134   | 12   | 82   | 111   |
| 13905 | 75    | 98    | 32.5 | 150   | 84    | 124   | 29   | 67   | 77    |
| 13906 | 133.5 | 117   | 44   | 168.5 | 79    | 139.5 | 31   | 179  | 135   |
| 13907 | 60    | 86    | 26   | 113   | 21    | 122   | 9    | 54   | 57    |
| 13908 | 432.5 | 101   | 61.5 | 321.5 | 39    | 124.5 | 99   | 439  | 121   |
| 13909 | 160.5 | 88    | 37   | 160   | 30    | 118   | 15   | 69   | 79    |
| 13910 | 54.5  | 87    | 26   | 114   | 38    | 115   | 10   | 61   | 62    |

|       |       |       |      |        |      |       |      |       |       |
|-------|-------|-------|------|--------|------|-------|------|-------|-------|
| 13911 | 46.5  | 84    | 25   | 116    | 18   | 118   | 8    | 51.5  | 91    |
| 13912 | 144.5 | 155   | 51   | 320    | 43   | 207.5 | 21   | 103   | 146   |
| 13913 | 129.5 | 147   | 59.5 | 197    | 64   | 218   | 32   | 119   | 129   |
| 13914 | 92    | 134   | 49   | 171    | 42   | 191   | 18   | 90    | 107   |
| 13915 | 101   | 151.5 | 49   | 214.5  | 43   | 209   | 22   | 105   | 163   |
| 13916 | 105   | 169   | 51   | 224    | 49   | 207   | 31   | 101   | 134   |
| 13917 | 98    | 146   | 45   | 212    | 37.5 | 204   | 20   | 89.5  | 126   |
| 13918 | 251.5 | 128   | 55   | 186    | 51   | 178   | 21   | 95    | 114   |
| 13919 | 163   | 159.5 | 49   | 190    | 47   | 243   | 28   | 101.5 | 132   |
| 13920 | 138   | 174   | 62   | 229    | 50   | 206.5 | 26   | 104   | 128   |
| 13921 | 103.5 | 146.5 | 46   | 187    | 44   | 183   | 23   | 101   | 116   |
| 13922 | 106   | 163.5 | 47.5 | 208.5  | 44   | 193   | 24   | 92    | 153   |
| 13923 | 105   | 162   | 50.5 | 229    | 70.5 | 205   | 37   | 105.5 | 175   |
| 13924 | 108   | 149.5 | 49.5 | 208.5  | 52   | 201   | 35.5 | 99    | 129   |
| 13925 | 211.5 | 162   | 49   | 213    | 52   | 201   | 36.5 | 118   | 179.5 |
| 13926 | 88    | 145   | 42   | 203    | 41   | 182   | 21   | 84.5  | 129   |
| 13927 | 95    | 145   | 45.5 | 202    | 42   | 178   | 25   | 86    | 137   |
| 13928 | 97.5  | 144   | 45   | 184    | 45   | 176   | 22   | 88.5  | 111   |
| 13929 | 163   | 149   | 52   | 206    | 42   | 204   | 25.5 | 87.5  | 132   |
| 13930 | 99    | 149   | 44   | 218    | 39.5 | 195   | 23   | 91    | 129   |
| 13931 | 117   | 152.5 | 48   | 206    | 51   | 198.5 | 30   | 104   | 132   |
| 13932 | 86.5  | 119   | 56   | 152    | 33.5 | 170   | 16   | 77    | 110   |
| 13933 | 87    | 139   | 42.5 | 176    | 40   | 187   | 23   | 90    | 131.5 |
| 13934 | 85.5  | 115   | 38   | 182    | 40.5 | 175   | 13   | 75    | 98    |
| 13935 | 85    | 117.5 | 40   | 155.5  | 31   | 163   | 15   | 78.5  | 93    |
| 13936 | 92    | 124   | 41.5 | 189    | 34.5 | 170   | 23.5 | 98    | 94    |
| 13937 | 281.5 | 236   | 44   | 207    | 75   | 444.5 | 26   | 119   | 203   |
| 13938 | 81    | 100   | 39   | 249    | 26.5 | 153.5 | 16   | 88.5  | 82    |
| 13939 | 72.5  | 94    | 34   | 153    | 25   | 147.5 | 23   | 71.5  | 66    |
| 13940 | 73    | 111   | 37   | 176    | 30   | 171   | 12   | 73    | 105   |
| 13941 | 102.5 | 109   | 48   | 216.5  | 41   | 169.5 | 18.5 | 91    | 90    |
| 13942 | 118.5 | 108   | 41   | 257.5  | 27   | 168   | 23   | 107   | 82    |
| 13943 | 71.5  | 105   | 38   | 134.5  | 24   | 161   | 13   | 74    | 90    |
| 13944 | 86.5  | 110   | 43.5 | 176    | 32   | 170.5 | 70   | 77    | 146   |
| 13945 | 124   | 119   | 48   | 257    | 61   | 182   | 22   | 124   | 133   |
| 13946 | 84    | 100.5 | 40   | 221.5  | 43   | 187   | 15   | 84    | 300   |
| 13947 | 83.5  | 102   | 43   | 159    | 40   | 157   | 14.5 | 76    | 141   |
| 13948 | 103   | 127   | 41   | 207    | 36.5 | 202   | 18   | 127   | 156   |
| 13949 | 98    | 97    | 37   | 186.5  | 3325 | 161.5 | 46   | 86    | 93    |
| 13950 | 642   | 1718  | 197  | 1676.5 | 384  | 869   | 423  | 595   | 906   |
| 13951 | 136   | 192   | 53   | 329.5  | 66   | 200   | 60   | 108   | 174   |
| 13952 | 69    | 90    | 42   | 175    | 56   | 156.5 | 21   | 72    | 103   |
| 13953 | 119   | 131   | 62   | 304    | 80   | 183   | 109  | 240   | 113   |
| 13954 | 78.5  | 104   | 35   | 122    | 24   | 156   | 14   | 65.5  | 91    |
| 13955 | 75    | 100   | 32   | 162    | 34   | 165   | 12   | 69    | 80    |
| 13956 | 99    | 123   | 34   | 187    | 41   | 167   | 17   | 74    | 129.5 |
| 13957 | 74.5  | 109   | 52   | 111    | 26   | 165.5 | 13   | 73    | 80    |

|       |       |       |      |       |      |       |      |      |       |
|-------|-------|-------|------|-------|------|-------|------|------|-------|
| 13958 | 73.5  | 104   | 32.5 | 108   | 25   | 150.5 | 23   | 72   | 80    |
| 13959 | 115   | 108   | 42.5 | 119.5 | 37   | 156   | 15   | 81   | 84    |
| 13960 | 80.5  | 105   | 33   | 115.5 | 26   | 163   | 12   | 81.5 | 80.5  |
| 13961 | 103.5 | 107   | 40.5 | 134   | 48   | 163   | 14   | 78.5 | 83    |
| 13962 | 118   | 96    | 45   | 120.5 | 32   | 196   | 22   | 86   | 77    |
| 13963 | 61.5  | 94    | 26   | 76    | 19   | 147   | 9    | 61   | 65    |
| 13964 | 63    | 100   | 31   | 94.5  | 32.5 | 154.5 | 11   | 63   | 88.5  |
| 13965 | 78    | 89.5  | 33   | 104   | 29   | 137   | 11   | 66.5 | 67    |
| 13966 | 67    | 90    | 31.5 | 107   | 23   | 151   | 12   | 67   | 72    |
| 13967 | 92    | 110   | 38   | 161.5 | 30   | 157   | 14   | 71   | 178   |
| 13968 | 67    | 102   | 34   | 172   | 26   | 155   | 16   | 71   | 73.5  |
| 13969 | 95.5  | 107   | 44   | 228.5 | 42   | 165.5 | 22   | 93   | 89.5  |
| 13970 | 81    | 100   | 31.5 | 123.5 | 23   | 157   | 11   | 70.5 | 133   |
| 13971 | 74    | 97    | 45   | 396   | 43   | 153   | 26   | 77   | 75    |
| 13972 | 99.5  | 104   | 41   | 207   | 1705 | 178   | 14   | 83   | 655.5 |
| 13973 | 83    | 102   | 39   | 179.5 | 31   | 150   | 13   | 69   | 90.5  |
| 13974 | 96    | 109   | 69   | 433.5 | 65   | 158   | 231  | 103  | 103   |
| 13975 | 121.5 | 109.5 | 39   | 163.5 | 32   | 173.5 | 17   | 94   | 141   |
| 13976 | 354   | 90    | 36   | 194.5 | 128  | 139   | 11   | 68   | 157   |
| 13977 | 89    | 96    | 59   | 174   | 39   | 141   | 32   | 68.5 | 124.5 |
| 13978 | 68.5  | 99    | 35   | 116   | 54   | 160   | 25   | 70.5 | 262   |
| 13979 | 61.5  | 95    | 29   | 95    | 31   | 158   | 11   | 67   | 84    |
| 13980 | 61    | 102   | 27   | 100   | 18.5 | 157.5 | 9    | 65   | 72.5  |
| 13981 | 56    | 89    | 23   | 100   | 155  | 132   | 10   | 55   | 64    |
| 13982 | 55.5  | 95    | 27   | 87    | 19   | 151   | 9    | 64   | 70.5  |
| 13983 | 62    | 92    | 25.5 | 99    | 20.5 | 148   | 9    | 64   | 71.5  |
| 13984 | 64    | 91    | 29   | 123   | 23   | 138   | 10   | 58   | 78    |
| 13985 | 64    | 86.5  | 26   | 97    | 45   | 131.5 | 10   | 60   | 64    |
| 13986 | 63    | 94    | 28.5 | 90    | 65   | 140   | 13   | 60.5 | 76    |
| 13987 | 76    | 101   | 41   | 185   | 83.5 | 130   | 13   | 63.5 | 89.5  |
| 13988 | 60    | 90    | 29   | 154.5 | 38.5 | 143   | 13   | 61   | 74.5  |
| 13989 | 59.5  | 85    | 26   | 85    | 21   | 130   | 9    | 60   | 55    |
| 13990 | 59    | 98    | 31.5 | 171   | 43   | 149   | 11   | 58   | 90    |
| 13991 | 63    | 94    | 32   | 137.5 | 32   | 146   | 14   | 67.5 | 73    |
| 13992 | 167   | 108   | 40   | 109   | 113  | 218   | 18   | 79   | 113.5 |
| 13993 | 85    | 93    | 32   | 151   | 27   | 139.5 | 13   | 70   | 144   |
| 13994 | 208   | 91    | 31   | 107.5 | 27   | 158   | 10   | 105  | 71    |
| 13995 | 59    | 78    | 26.5 | 93.5  | 28   | 134.5 | 11   | 55   | 57.5  |
| 13996 | 67.5  | 69    | 32   | 104   | 19   | 124   | 10   | 56   | 62    |
| 13997 | 93.5  | 93.5  | 29   | 125.5 | 28   | 137   | 14   | 60   | 67    |
| 13998 | 67    | 80.5  | 27   | 101   | 30   | 121   | 11.5 | 56   | 58    |
| 13999 | 61    | 95    | 26   | 103.5 | 24   | 165   | 9    | 69   | 69    |
| 14000 | 131   | 102   | 31   | 98.5  | 66   | 154   | 14   | 65   | 100.5 |
| 14001 | 79    | 95    | 59   | 248.5 | 31   | 144   | 43   | 90   | 85.5  |
| 14002 | 185   | 89.5  | 32   | 104   | 26   | 142   | 12   | 70   | 69    |
| 14003 | 80    | 115.5 | 36   | 111   | 50   | 158   | 47   | 128  | 102   |
| 14004 | 91.5  | 85    | 34   | 197   | 38   | 135   | 15   | 60   | 65    |

|       |      |       |      |       |      |       |      |       |       |
|-------|------|-------|------|-------|------|-------|------|-------|-------|
| 14005 | 93.5 | 97.5  | 59   | 167   | 29.5 | 150   | 18.5 | 72    | 107   |
| 14006 | 243  | 94    | 31   | 120   | 43   | 138   | 19   | 55    | 67    |
| 14007 | 152  | 88    | 33   | 109.5 | 69.5 | 146   | 14   | 62.5  | 78.5  |
| 14008 | 82   | 114.5 | 35.5 | 154   | 36   | 143   | 25   | 72    | 106.5 |
| 14009 | 75.5 | 127   | 39.5 | 179   | 36   | 157   | 25   | 81    | 150   |
| 14010 | 78.5 | 114   | 31.5 | 155   | 26   | 135   | 16.5 | 64    | 91    |
| 14011 | 73   | 113   | 32   | 132   | 26   | 158   | 16   | 71    | 85    |
| 14012 | 74   | 111   | 36   | 169   | 35   | 150   | 19   | 68    | 89    |
| 14013 | 181  | 123   | 42.5 | 207   | 46   | 158.5 | 23   | 80    | 91    |
| 14014 | 78.5 | 100   | 35   | 148.5 | 28   | 143   | 19   | 67    | 77    |
| 14015 | 88.5 | 192   | 34   | 158   | 115  | 155   | 19   | 73.5  | 98    |
| 14016 | 147  | 179   | 43   | 194.5 | 39.5 | 438   | 27   | 175.5 | 140   |
| 14017 | 97   | 118   | 33   | 162   | 31.5 | 158   | 21   | 68    | 94    |
| 14018 | 76   | 111   | 33   | 139   | 30.5 | 148.5 | 20   | 70.5  | 93.5  |
| 14019 | 94.5 | 114.5 | 41   | 181   | 30   | 144   | 19   | 68    | 97    |
| 14020 | 145  | 171   | 62.5 | 200.5 | 53.5 | 404   | 24   | 164   | 139.5 |
| 14021 | 91.5 | 120   | 36   | 181   | 46   | 165   | 25   | 76    | 103   |
| 14022 | 75.5 | 118   | 32   | 151.5 | 25   | 163   | 13.5 | 76.5  | 112.5 |
| 14023 | 79   | 129.5 | 39   | 216   | 34   | 159   | 23   | 76    | 94    |
| 14024 | 82   | 123   | 36   | 189   | 51   | 156.5 | 23.5 | 74    | 127.5 |
| 14025 | 76.5 | 118   | 33   | 177   | 72   | 151   | 17   | 69.5  | 88    |
| 14026 | 80.5 | 120   | 38   | 151   | 35   | 158   | 24   | 78    | 116.5 |
| 14027 | 75   | 119   | 33   | 157   | 42   | 145   | 21   | 64    | 84.5  |
| 14028 | 92.5 | 147   | 43   | 186   | 44.5 | 175.5 | 31   | 85    | 125   |
| 14029 | 71   | 96    | 33   | 138   | 29   | 142   | 15   | 63    | 84    |
| 14030 | 80   | 134   | 35   | 174   | 30   | 165   | 22   | 79    | 94    |
| 14031 | 83.5 | 126   | 34   | 194.5 | 43   | 149   | 23   | 75    | 118   |
| 14032 | 107  | 128   | 34   | 191.5 | 33.5 | 152.5 | 21   | 73    | 153   |
| 14033 | 77   | 120   | 32   | 166   | 30   | 143.5 | 20   | 70    | 85    |
| 14034 | 88   | 119   | 35   | 180   | 39   | 158.5 | 21   | 74    | 96    |
| 14035 | 89   | 137.5 | 37   | 167   | 38   | 160   | 23   | 75.5  | 102   |
| 14036 | 83.5 | 137   | 40   | 168   | 45   | 173   | 25   | 77    | 98.5  |
| 14037 | 82.5 | 116   | 49   | 180.5 | 41   | 153.5 | 19   | 68    | 163   |
| 14038 | 59   | 91.5  | 31   | 126   | 23   | 141   | 13   | 63    | 82    |
| 14039 | 89   | 135   | 42   | 178.5 | 50.5 | 164   | 31.5 | 81    | 128   |
| 14040 | 96.5 | 138   | 35   | 260   | 50.5 | 172   | 21   | 89    | 97    |
| 14041 | 74   | 103   | 36   | 141   | 27   | 131.5 | 18   | 65    | 115   |
| 14042 | 76   | 121   | 39.5 | 165.5 | 38   | 165   | 24   | 77    | 198.5 |
| 14043 | 75   | 116   | 35   | 159   | 36   | 142   | 24   | 65.5  | 101   |
| 14044 | 89.5 | 126   | 32   | 163.5 | 34   | 157   | 18   | 76    | 95    |
| 14045 | 69.5 | 102   | 33.5 | 139   | 27   | 143   | 14   | 66.5  | 85    |
| 14046 | 91   | 112   | 35   | 144   | 32   | 143   | 22   | 72    | 105   |
| 14047 | 85   | 137   | 39   | 207   | 41   | 164   | 30   | 81.5  | 108   |
| 14048 | 75   | 114   | 31   | 154   | 36   | 146   | 18   | 67    | 114   |
| 14049 | 68   | 100   | 36   | 173   | 32   | 149.5 | 18   | 66.5  | 90    |
| 14050 | 74   | 125   | 34   | 162   | 30   | 154.5 | 22   | 72    | 129   |
| 14051 | 104  | 185   | 46   | 182.5 | 40   | 274   | 16   | 113.5 | 162   |

|       |       |       |      |       |      |       |      |       |       |
|-------|-------|-------|------|-------|------|-------|------|-------|-------|
| 14052 | 141   | 250   | 61   | 256   | 64.5 | 301   | 46   | 140   | 213   |
| 14053 | 99    | 196   | 57   | 200   | 63   | 259   | 28   | 116   | 148   |
| 14054 | 188   | 399   | 87   | 389   | 150  | 380   | 90   | 217   | 305   |
| 14055 | 94.5  | 186.5 | 45   | 187   | 30   | 268   | 15   | 129   | 124   |
| 14056 | 89.5  | 189   | 39.5 | 133   | 28   | 263   | 12   | 115.5 | 123.5 |
| 14057 | 332   | 187   | 63   | 140.5 | 45.5 | 261   | 26   | 131   | 154.5 |
| 14058 | 102   | 190   | 46   | 162   | 41   | 269   | 24   | 133   | 131   |
| 14059 | 98.5  | 196   | 44   | 146   | 40   | 262   | 15   | 136   | 121   |
| 14060 | 98    | 202   | 42   | 151   | 33   | 279   | 26   | 115.5 | 114   |
| 14061 | 97    | 174   | 41   | 158   | 28.5 | 252.5 | 12   | 108   | 115.5 |
| 14062 | 85    | 179   | 49   | 186   | 41.5 | 264   | 14   | 111   | 127.5 |
| 14063 | 87    | 186.5 | 37   | 115.5 | 32   | 264.5 | 15   | 114   | 114   |
| 14064 | 93    | 170.5 | 40   | 177   | 26   | 252.5 | 11   | 107   | 120   |
| 14065 | 89    | 159.5 | 37   | 133.5 | 29   | 252   | 12   | 108.5 | 106   |
| 14066 | 87    | 175   | 45   | 170.5 | 27   | 252   | 12   | 112   | 116.5 |
| 14067 | 103   | 180   | 39   | 175.5 | 27   | 263.5 | 14   | 109   | 118   |
| 14068 | 88.5  | 163   | 37   | 124   | 25   | 227   | 13   | 101   | 102   |
| 14069 | 99    | 183   | 40   | 166.5 | 200  | 257.5 | 14   | 103.5 | 107   |
| 14070 | 101   | 153   | 44.5 | 116   | 40   | 223   | 15   | 102   | 103   |
| 14071 | 81    | 181   | 40   | 145   | 26   | 256   | 14   | 108   | 105   |
| 14072 | 78.5  | 168   | 38   | 129.5 | 25.5 | 234   | 11   | 98    | 106   |
| 14073 | 112   | 175   | 44   | 146   | 40   | 271.5 | 22   | 112   | 113.5 |
| 14074 | 131.5 | 183   | 64   | 311   | 51   | 256   | 24.5 | 159   | 168.5 |
| 14075 | 114   | 170.5 | 44.5 | 144   | 60   | 261   | 28   | 117.5 | 109   |
| 14076 | 105   | 172   | 48   | 186.5 | 29   | 234   | 15   | 116   | 118   |
| 14077 | 108.5 | 169   | 38   | 194   | 34   | 243   | 13   | 114   | 140   |
| 14078 | 116   | 177   | 48   | 247   | 33   | 253   | 27   | 178   | 136   |
| 14079 | 94.5  | 189.5 | 40   | 166   | 28   | 264   | 13   | 114   | 121   |
| 14080 | 93    | 174   | 41   | 117   | 31   | 254   | 17   | 105   | 105.5 |
| 14081 | 80.5  | 165   | 41   | 128   | 32   | 239.5 | 12   | 102   | 109   |
| 14082 | 83    | 183   | 36   | 143   | 28   | 253   | 13   | 106   | 106   |
| 14083 | 84    | 172   | 41   | 179   | 50.5 | 258   | 14   | 103   | 110   |
| 14084 | 86    | 172   | 39   | 141   | 26   | 243   | 21   | 113.5 | 113   |
| 14085 | 85    | 155   | 42   | 207.5 | 40.5 | 235   | 13   | 106   | 123   |
| 14086 | 71    | 151   | 32.5 | 101   | 24   | 232.5 | 11   | 89    | 99    |
| 14087 | 71    | 155   | 32   | 98.5  | 25   | 233   | 9    | 93    | 97    |
| 14088 | 82.5  | 161.5 | 36.5 | 128.5 | 40   | 241.5 | 13.5 | 119   | 131   |
| 14089 | 65    | 125   | 34   | 130.5 | 25   | 206.5 | 12   | 85.5  | 83    |
| 14090 | 127   | 187.5 | 52   | 190.5 | 47   | 271   | 15   | 146   | 151   |
| 14091 | 91    | 157   | 43   | 223   | 37   | 239   | 14   | 102   | 140   |
| 14092 | 147   | 155.5 | 38.5 | 149.5 | 68.5 | 257   | 19   | 113.5 | 119   |
| 14093 | 130   | 133   | 38   | 160   | 47   | 219   | 16   | 98.5  | 101   |
| 14094 | 92    | 155   | 40   | 141   | 64   | 241.5 | 13   | 98.5  | 217.5 |
| 14095 | 99    | 155   | 46.5 | 220   | 66.5 | 229   | 20   | 120   | 221.5 |
| 14096 | 102.5 | 59    | 30   | 110.5 | 54.5 | 61    | 32   | 43    | 59    |
| 14097 | 85.5  | 172.5 | 47   | 194   | 60   | 233   | 19   | 124.5 | 229   |
| 14098 | 119   | 165.5 | 47   | 205   | 36   | 249   | 28   | 123   | 118   |

|       |       |       |      |       |      |       |      |       |       |
|-------|-------|-------|------|-------|------|-------|------|-------|-------|
| 14099 | 110   | 145   | 36   | 105   | 25   | 233   | 12   | 91    | 120   |
| 14100 | 78    | 148.5 | 33   | 112.5 | 50   | 225   | 10   | 90    | 99.5  |
| 14101 | 72.5  | 146   | 28.5 | 90    | 21   | 215   | 11   | 88    | 91    |
| 14102 | 69    | 128   | 28   | 84    | 19   | 209.5 | 9    | 80.5  | 82.5  |
| 14103 | 63    | 133   | 28   | 93.5  | 18.5 | 192   | 10   | 72    | 80    |
| 14104 | 75    | 153   | 30   | 93    | 24   | 214.5 | 9    | 84    | 90.5  |
| 14105 | 109.5 | 158   | 39   | 104   | 455  | 251   | 22   | 96    | 129   |
| 14106 | 188   | 149   | 34.5 | 135   | 34   | 232   | 14   | 96    | 104   |
| 14107 | 61.5  | 129   | 31   | 91.5  | 18   | 197   | 10   | 81    | 78.5  |
| 14108 | 61    | 148   | 32   | 101.5 | 18   | 201   | 9    | 83    | 92    |
| 14109 | 77    | 154   | 38   | 136.5 | 29   | 231   | 13   | 108   | 108   |
| 14110 | 105.5 | 140   | 44   | 132   | 31   | 211.5 | 17   | 89    | 95    |
| 14111 | 88    | 149.5 | 48   | 137.5 | 24.5 | 211.5 | 85.5 | 117.5 | 109.5 |
| 14112 | 75    | 141.5 | 38   | 144   | 83   | 205.5 | 45   | 98    | 95    |
| 14113 | 94    | 153.5 | 46   | 190   | 44   | 224   | 17   | 114   | 115   |
| 14114 | 80    | 143.5 | 31   | 125   | 30   | 222.5 | 11   | 103   | 91    |
| 14115 | 89    | 154   | 50   | 197   | 51   | 230.5 | 13   | 104   | 111   |
| 14116 | 73    | 68    | 33   | 107   | 55   | 77    | 20   | 34.5  | 73    |
| 14117 | 56    | 47.5  | 28   | 113   | 48   | 59    | 14.5 | 20    | 48    |
| 14118 | 160   | 72    | 36   | 112   | 64.5 | 128.5 | 20   | 30.5  | 61.5  |
| 14119 | 127.5 | 83    | 41   | 107   | 66   | 89.5  | 26   | 48    | 77    |
| 14120 | 136   | 82    | 38   | 105   | 60   | 131   | 28   | 40    | 96    |
| 14121 | 94    | 92    | 39   | 126   | 62   | 117.5 | 27   | 44    | 89    |
| 14122 | 69.5  | 46.5  | 27   | 113.5 | 53.5 | 63    | 16   | 22    | 53    |
| 14123 | 67    | 66    | 36   | 102.5 | 58   | 71.5  | 22   | 41    | 72    |
| 14124 | 63    | 46.5  | 23   | 96    | 52   | 61    | 15   | 21    | 84    |
| 14125 | 69    | 69.5  | 41   | 126   | 62   | 73.5  | 32   | 58    | 70.5  |
| 14126 | 75    | 70    | 36   | 106.5 | 58   | 81    | 24   | 48    | 68    |
| 14127 | 69    | 66    | 36   | 104   | 63   | 77    | 23   | 34.5  | 70    |
| 14128 | 73    | 65.5  | 48   | 127.5 | 65   | 75    | 24   | 44    | 87.5  |
| 14129 | 84.5  | 82    | 45   | 131   | 68   | 82    | 26.5 | 57    | 110   |
| 14130 | 86    | 82    | 42   | 116.5 | 65   | 78.5  | 33   | 56    | 82    |
| 14131 | 80    | 88.5  | 40.5 | 112.5 | 57   | 74    | 27   | 50    | 82    |
| 14132 | 69    | 67.5  | 42   | 136   | 55   | 69    | 23   | 52    | 85    |
| 14133 | 68.5  | 59    | 31   | 100   | 56   | 63    | 22   | 40    | 76    |
| 14134 | 104   | 56.5  | 27   | 107   | 53   | 76    | 18   | 28    | 57    |
| 14135 | 67    | 72.5  | 40   | 111   | 58   | 76    | 23   | 36    | 77    |
| 14136 | 70    | 67    | 34   | 110   | 53   | 69    | 23   | 45    | 77    |
| 14137 | 56    | 67    | 31   | 100.5 | 52   | 60.5  | 22   | 40    | 80    |
| 14138 | 75.5  | 103   | 47   | 139   | 69   | 80.5  | 36   | 74    | 128.5 |
| 14139 | 70    | 90    | 47   | 117   | 61   | 77    | 31   | 57    | 89    |
| 14140 | 63    | 68    | 32   | 92    | 47.5 | 65    | 21   | 40    | 62.5  |
| 14141 | 64    | 79    | 39   | 100   | 64.5 | 66    | 30   | 48    | 75    |
| 14142 | 66.5  | 75    | 34   | 95    | 54   | 63    | 25   | 47.5  | 72.5  |
| 14143 | 59    | 66    | 35   | 92    | 49   | 66    | 23   | 41    | 75.5  |
| 14144 | 68    | 80    | 40   | 130   | 60.5 | 76    | 30   | 56    | 93    |
| 14145 | 62.5  | 56    | 89   | 99.5  | 59   | 60    | 21   | 37    | 62    |

|       |      |      |      |       |       |      |      |      |       |
|-------|------|------|------|-------|-------|------|------|------|-------|
| 14146 | 264  | 68.5 | 33.5 | 110.5 | 91    | 76.5 | 22   | 53   | 73    |
| 14147 | 127  | 89   | 42.5 | 138   | 60    | 80   | 29   | 67   | 95    |
| 14148 | 62   | 58.5 | 36   | 112   | 51.5  | 66   | 19   | 37   | 109.5 |
| 14149 | 68.5 | 88   | 44   | 109.5 | 74    | 84   | 35   | 58   | 104   |
| 14150 | 66   | 66   | 40.5 | 132   | 57    | 62   | 25.5 | 41   | 60    |
| 14151 | 67   | 75   | 37   | 99.5  | 49    | 66   | 27   | 50.5 | 80    |
| 14152 | 57   | 44   | 77   | 117   | 51    | 54   | 14   | 23   | 46    |
| 14153 | 63   | 81   | 35   | 100   | 65    | 75   | 25.5 | 48   | 94    |
| 14154 | 87   | 57   | 26   | 106   | 59    | 61.5 | 18   | 35.5 | 58    |
| 14155 | 75.5 | 92   | 50   | 115.5 | 61    | 77.5 | 37   | 64   | 110   |
| 14156 | 92   | 64   | 42   | 111.5 | 72    | 63   | 35   | 43   | 78    |
| 14157 | 70   | 36   | 20   | 68    | 42.5  | 47   | 11   | 16   | 39    |
| 14158 | 53   | 38   | 16   | 76    | 37    | 48   | 10   | 19   | 30    |
| 14159 | 48   | 37   | 19   | 68    | 42    | 50   | 14   | 13   | 32    |
| 14160 | 51   | 38   | 18   | 66    | 43.5  | 49   | 11   | 12   | 31    |
| 14161 | 53   | 39   | 20   | 96    | 44    | 53   | 11   | 20   | 46    |
| 14162 | 43   | 32   | 14   | 49    | 45    | 45.5 | 9.5  | 11   | 27    |
| 14163 | 51   | 35   | 31   | 50    | 46.5  | 52   | 13   | 39   | 43.5  |
| 14164 | 67   | 36   | 23   | 61    | 49    | 54   | 13   | 14.5 | 32    |
| 14165 | 72   | 36   | 18   | 51    | 44    | 50   | 12   | 15   | 29    |
| 14166 | 67.5 | 38   | 24   | 73    | 61    | 54.5 | 22   | 53   | 38    |
| 14167 | 47   | 36   | 19   | 76    | 50    | 51   | 10   | 70   | 32    |
| 14168 | 63   | 33   | 22   | 77    | 58    | 46   | 22   | 24   | 50    |
| 14169 | 53.5 | 37   | 19   | 49    | 46    | 109  | 36   | 18   | 31    |
| 14170 | 84   | 35   | 25   | 83    | 72    | 53   | 14   | 53   | 37    |
| 14171 | 74   | 34.5 | 20   | 69.5  | 71    | 44   | 15   | 20   | 36.5  |
| 14172 | 80   | 39   | 77   | 61    | 49    | 50.5 | 17   | 21   | 46    |
| 14173 | 44   | 34   | 17   | 64    | 37    | 50   | 9    | 16   | 77.5  |
| 14174 | 47   | 35.5 | 17   | 72    | 36    | 53   | 9    | 16   | 42    |
| 14175 | 42.5 | 33   | 17   | 71    | 32.5  | 52   | 10   | 14   | 34    |
| 14176 | 45   | 36   | 17   | 76    | 49    | 51.5 | 9    | 18   | 31    |
| 14177 | 44   | 33.5 | 19   | 66    | 50    | 49   | 12   | 15.5 | 40    |
| 14178 | 46   | 33   | 17   | 63    | 41    | 47   | 9    | 15   | 30    |
| 14179 | 38   | 29   | 12   | 49    | 44    | 47   | 5.5  | 16.5 | 30    |
| 14180 | 33.5 | 33   | 20   | 70    | 23.5  | 55   | 8    | 10   | 33    |
| 14181 | 47   | 46   | 26   | 80.5  | 56.5  | 56   | 13   | 15   | 64    |
| 14182 | 48   | 40   | 19   | 64    | 42    | 56   | 10   | 16   | 36    |
| 14183 | 57.5 | 34   | 19.5 | 150   | 43    | 46   | 9    | 16   | 32    |
| 14184 | 35.5 | 34   | 14   | 44.5  | 40    | 51   | 14   | 17   | 26    |
| 14185 | 44.5 | 36   | 19   | 72.5  | 101.5 | 47   | 11   | 23.5 | 69.5  |
| 14186 | 56   | 32   | 25   | 100.5 | 53    | 46   | 26   | 22   | 47.5  |
| 14187 | 47   | 35   | 26   | 109   | 47.5  | 46   | 30   | 22   | 42    |
| 14188 | 60   | 40   | 22   | 55    | 45    | 54   | 15   | 18   | 38    |
| 14189 | 42.5 | 31   | 21.5 | 68    | 44    | 43   | 11   | 16   | 48    |
| 14190 | 57   | 32   | 22   | 98    | 44    | 45   | 18   | 17   | 28    |
| 14191 | 60.5 | 36   | 25   | 136   | 48.5  | 46.5 | 25   | 23   | 35    |
| 14192 | 48   | 35   | 24   | 136.5 | 50    | 48   | 16   | 21   | 36    |



|       |      |       |      |       |      |      |      |      |       |
|-------|------|-------|------|-------|------|------|------|------|-------|
| 14193 | 52   | 32    | 21   | 125   | 54   | 46   | 44   | 27   | 34    |
| 14194 | 42   | 36    | 18   | 76    | 38   | 41   | 10   | 15   | 29    |
| 14195 | 70   | 42    | 49   | 119.5 | 72   | 51   | 20.5 | 39   | 80    |
| 14196 | 95   | 33    | 17   | 57    | 215  | 47   | 12   | 21   | 34    |
| 14197 | 65   | 35    | 29   | 123   | 52   | 50.5 | 38   | 33   | 46    |
| 14198 | 47   | 32.5  | 21   | 73    | 46   | 52   | 17   | 32   | 31    |
| 14199 | 57.5 | 29    | 15   | 65    | 132  | 44   | 18   | 15   | 49    |
| 14200 | 243  | 33.5  | 16.5 | 57    | 39   | 46   | 13   | 78   | 30    |
| 14201 | 41   | 30    | 31   | 82    | 38.5 | 42   | 15   | 18   | 160   |
| 14202 | 57   | 35    | 22   | 104   | 49   | 50   | 33   | 84   | 35    |
| 14203 | 42   | 29.5  | 26.5 | 54    | 59   | 45   | 14   | 27   | 29    |
| 14204 | 46.5 | 34    | 178  | 66    | 44   | 45   | 11   | 20   | 38    |
| 14205 | 42.5 | 31    | 19   | 53    | 64   | 38.5 | 11   | 24   | 26    |
| 14206 | 43   | 32    | 37   | 66    | 33   | 42   | 8    | 13   | 30    |
| 14207 | 49   | 32    | 21   | 57    | 45.5 | 41   | 14   | 21   | 26    |
| 14208 | 45.5 | 36    | 19   | 88.5  | 37   | 50   | 15   | 18   | 33    |
| 14209 | 42   | 32    | 21   | 86    | 41   | 43   | 12   | 18   | 72    |
| 14210 | 39   | 34    | 18   | 93    | 36   | 43   | 10   | 17   | 48    |
| 14211 | 48   | 44    | 23   | 78.5  | 39   | 44   | 14   | 27   | 73.5  |
| 14212 | 59   | 51    | 23   | 85    | 39   | 50   | 17   | 31   | 54    |
| 14213 | 50   | 48    | 24   | 80.5  | 40   | 53   | 15   | 40   | 86    |
| 14214 | 55   | 33    | 21   | 113   | 49   | 43   | 15   | 19.5 | 26.5  |
| 14215 | 41   | 31    | 15   | 73    | 39   | 41   | 9    | 14   | 31    |
| 14216 | 38   | 29    | 16   | 62.5  | 34   | 37   | 10   | 14   | 31.5  |
| 14217 | 42   | 35    | 17   | 74    | 35.5 | 51   | 12   | 21   | 35    |
| 14218 | 68   | 73    | 34   | 121   | 52.5 | 66   | 23   | 42   | 68    |
| 14219 | 54.5 | 58.5  | 36   | 109   | 67   | 59   | 19   | 32   | 58    |
| 14220 | 72   | 99    | 44.5 | 131   | 63   | 77.5 | 33   | 65   | 111   |
| 14221 | 75.5 | 74    | 38   | 132   | 63   | 72   | 25   | 49   | 68    |
| 14222 | 68   | 101.5 | 50   | 159   | 67   | 79   | 36   | 64   | 88    |
| 14223 | 60   | 90    | 41   | 114.5 | 56.5 | 66.5 | 30   | 51   | 98    |
| 14224 | 79   | 91    | 48   | 152.5 | 62   | 79   | 32   | 67   | 100   |
| 14225 | 65.5 | 86    | 45   | 133.5 | 57   | 70.5 | 23   | 58   | 85    |
| 14226 | 77   | 98.5  | 55   | 132   | 127  | 82   | 38   | 71.5 | 112   |
| 14227 | 60   | 69    | 34   | 119.5 | 59   | 66   | 23   | 45   | 62    |
| 14228 | 67   | 97    | 46   | 131   | 65   | 81   | 32   | 55.5 | 103.5 |
| 14229 | 75   | 86    | 44.5 | 130   | 65   | 70   | 27.5 | 55   | 81    |
| 14230 | 74   | 85    | 46   | 139   | 61.5 | 79   | 27   | 85   | 90.5  |
| 14231 | 79   | 63    | 36.5 | 118   | 60   | 60   | 22   | 39   | 97    |
| 14232 | 65   | 79    | 43.5 | 157   | 63   | 66.5 | 29   | 57   | 78    |
| 14233 | 76.5 | 88    | 40.5 | 134.5 | 65   | 67   | 35   | 58   | 84    |
| 14234 | 59.5 | 74    | 46   | 152   | 66   | 59   | 27.5 | 51   | 71    |
| 14235 | 54   | 72    | 38   | 120   | 59   | 67   | 28   | 48   | 77    |
| 14236 | 65   | 66    | 37.5 | 148   | 52   | 66   | 26   | 44   | 70.5  |
| 14237 | 62   | 82    | 43   | 134.5 | 73.5 | 64.5 | 37   | 59   | 89    |
| 14238 | 80   | 68    | 35.5 | 145   | 58   | 79   | 23   | 45   | 69    |
| 14239 | 63.5 | 82    | 40   | 122   | 64   | 67   | 27   | 54.5 | 71    |

|       |       |      |      |       |       |       |      |      |       |
|-------|-------|------|------|-------|-------|-------|------|------|-------|
| 14240 | 107.5 | 111  | 55   | 153   | 71    | 82.5  | 39   | 77   | 129.5 |
| 14241 | 55.5  | 56   | 33   | 119   | 52    | 55    | 21   | 52   | 62    |
| 14242 | 71.5  | 88   | 47   | 160   | 65    | 73.5  | 34   | 72   | 117   |
| 14243 | 63    | 71   | 35   | 130   | 60    | 63    | 25   | 50   | 70    |
| 14244 | 60    | 74   | 36   | 118   | 55    | 67    | 21   | 51   | 88    |
| 14245 | 86    | 97   | 41   | 123   | 58    | 77.5  | 31   | 61   | 94.5  |
| 14246 | 76    | 94.5 | 43   | 162.5 | 57    | 71    | 35   | 68.5 | 108.5 |
| 14247 | 70    | 99   | 55   | 165   | 66    | 83.5  | 38   | 67   | 92.5  |
| 14248 | 46    | 44.5 | 27   | 108.5 | 44    | 43    | 17   | 28   | 75    |
| 14249 | 70    | 79   | 37   | 111   | 57    | 70    | 31   | 60.5 | 72    |
| 14250 | 60.5  | 86   | 46   | 134.5 | 54    | 64    | 31   | 60   | 89    |
| 14251 | 55    | 74   | 36   | 120   | 51.5  | 66    | 23   | 41   | 63.5  |
| 14252 | 66.5  | 82   | 38   | 141   | 55.5  | 64    | 29   | 53   | 89    |
| 14253 | 55    | 62   | 27   | 109   | 48    | 56    | 21   | 43   | 78    |
| 14254 | 61    | 63   | 39   | 138   | 58    | 61    | 32   | 52   | 70    |
| 14255 | 55    | 61   | 41   | 105   | 51    | 58.5  | 21   | 37   | 53    |
| 14256 | 110   | 86   | 133  | 133   | 63    | 72    | 30   | 56   | 112   |
| 14257 | 75    | 59.5 | 30   | 102   | 48    | 60.5  | 20   | 35   | 59    |
| 14258 | 73    | 70   | 35   | 102.5 | 57    | 63    | 25   | 44   | 102   |
| 14259 | 60    | 63.5 | 35   | 129   | 51    | 62    | 26   | 42   | 70    |
| 14260 | 213   | 95   | 48   | 115   | 60    | 97    | 30.5 | 62   | 101   |
| 14261 | 59    | 79   | 41   | 135   | 53    | 60    | 28   | 56   | 84    |
| 14262 | 64    | 77.5 | 38   | 123   | 54    | 67    | 34   | 54   | 79    |
| 14263 | 62    | 92.5 | 48   | 133   | 67    | 71    | 34   | 62   | 101.5 |
| 14264 | 59    | 67.5 | 35   | 147   | 56.5  | 62    | 24   | 46   | 64    |
| 14265 | 56    | 81   | 41.5 | 135   | 57.5  | 64    | 32   | 56   | 76    |
| 14266 | 51    | 50   | 36   | 124   | 47    | 50    | 21   | 37   | 57    |
| 14267 | 72.5  | 87   | 45   | 131   | 53    | 68.5  | 35   | 76   | 79.5  |
| 14268 | 62    | 54   | 32.5 | 122.5 | 83    | 42    | 20   | 41   | 62    |
| 14269 | 51.5  | 57   | 30   | 128   | 51    | 49    | 17   | 39   | 55.5  |
| 14270 | 69    | 101  | 44   | 139   | 62    | 74.5  | 38   | 72.5 | 97    |
| 14271 | 325   | 80   | 42   | 118.5 | 60    | 109.5 | 30   | 54   | 86.5  |
| 14272 | 63.5  | 76   | 42   | 109.5 | 55.5  | 67    | 24   | 47   | 79    |
| 14273 | 59    | 82   | 44   | 129.5 | 57    | 67.5  | 33   | 67   | 80    |
| 14274 | 52    | 66   | 34   | 123   | 49    | 58    | 22   | 47   | 121   |
| 14275 | 64    | 77.5 | 41   | 135   | 49.5  | 65    | 32   | 61   | 79    |
| 14276 | 59    | 67   | 63   | 131.5 | 54.5  | 52    | 25   | 49   | 83.5  |
| 14277 | 65    | 65   | 31.5 | 125   | 53    | 58    | 23.5 | 43.5 | 112.5 |
| 14278 | 53    | 58   | 33   | 104.5 | 48    | 53.5  | 23   | 44   | 53    |
| 14279 | 66    | 62   | 36   | 120.5 | 51    | 65    | 20   | 47   | 62    |
| 14280 | 52    | 37   | 22   | 65.5  | 262.5 | 46    | 18   | 54   | 39    |
| 14281 | 78    | 33   | 34   | 111   | 63    | 42    | 36   | 46   | 74    |
| 14282 | 54    | 43   | 15   | 62    | 39    | 62    | 11   | 23   | 50    |
| 14283 | 129   | 71   | 23   | 95.5  | 51    | 126   | 16   | 27   | 93    |
| 14284 | 41    | 35   | 21   | 103   | 38    | 44.5  | 11   | 23   | 26    |
| 14285 | 75    | 32   | 15   | 62    | 39    | 39    | 11   | 17   | 24    |
| 14286 | 111   | 32   | 25   | 88    | 59    | 42    | 13   | 30   | 33    |

|       |       |      |      |       |       |       |      |      |      |
|-------|-------|------|------|-------|-------|-------|------|------|------|
| 14287 | 33.5  | 33   | 16   | 58.5  | 36    | 40.5  | 11   | 12   | 23   |
| 14288 | 34    | 31   | 16   | 59    | 35    | 39.5  | 8    | 13   | 23   |
| 14289 | 37    | 30   | 17   | 61    | 38    | 41    | 8    | 14   | 24   |
| 14290 | 39    | 31   | 12   | 56    | 36.5  | 37    | 9    | 13   | 31   |
| 14291 | 50    | 34   | 16   | 63    | 41    | 42    | 11   | 57   | 30   |
| 14292 | 44.5  | 22   | 16   | 74    | 50    | 26    | 22   | 15   | 24   |
| 14293 | 55    | 51   | 22   | 84    | 50    | 59    | 13   | 20   | 37   |
| 14294 | 54    | 48.5 | 23.5 | 87    | 55    | 60    | 12   | 21   | 39   |
| 14295 | 50.5  | 48   | 23   | 76    | 56    | 56.5  | 14   | 18   | 39   |
| 14296 | 347.5 | 81   | 51   | 129.5 | 101.5 | 99    | 56   | 79   | 75.5 |
| 14297 | 47.5  | 43   | 19   | 67    | 46    | 51    | 20.5 | 14   | 32   |
| 14298 | 88    | 87   | 28.5 | 103   | 30    | 120.5 | 18   | 48   | 68   |
| 14299 | 54    | 66   | 28.5 | 108   | 38    | 52    | 21   | 36   | 72   |
| 14300 | 72    | 81   | 32   | 111   | 41    | 76.5  | 25   | 48   | 67   |
| 14301 | 67.5  | 71.5 | 32   | 123   | 42    | 78    | 26   | 50   | 74   |
| 14302 | 60    | 65   | 31.5 | 109.5 | 32    | 68    | 19   | 42   | 175  |
| 14303 | 69.5  | 85   | 34   | 109   | 34.5  | 73.5  | 21   | 44   | 104  |
| 14304 | 59.5  | 76   | 28   | 112   | 44    | 73    | 18   | 43   | 63   |
| 14305 | 52    | 70   | 28   | 117   | 35.5  | 77    | 19   | 43.5 | 98.5 |
| 14306 | 66    | 69   | 31   | 104   | 40    | 73    | 21   | 39.5 | 67   |
| 14307 | 68    | 71.5 | 32   | 115   | 32    | 79    | 23   | 48   | 80   |
| 14308 | 67    | 84   | 28   | 99    | 42.5  | 76    | 14   | 41   | 77   |
| 14309 | 65    | 90   | 32.5 | 137.5 | 38    | 81    | 25   | 44   | 88   |
| 14310 | 55    | 76   | 27   | 103.5 | 40    | 68    | 21   | 42   | 58   |
| 14311 | 57.5  | 70   | 32   | 118   | 43    | 62    | 22   | 42   | 81   |
| 14312 | 86    | 71   | 27   | 128   | 31.5  | 79.5  | 20   | 45   | 83   |
| 14313 | 48.5  | 53   | 26   | 103   | 26    | 59.5  | 14.5 | 35   | 47   |
| 14314 | 85    | 73   | 29   | 97    | 37    | 68.5  | 20   | 43   | 85   |
| 14315 | 57    | 47   | 30   | 96    | 29    | 60    | 14   | 34   | 51   |
| 14316 | 59    | 81   | 33   | 119   | 43    | 77    | 25   | 47   | 68.5 |
| 14317 | 50.5  | 58   | 26   | 86    | 32    | 65    | 20   | 41   | 67   |
| 14318 | 47    | 54   | 26   | 87    | 39    | 61    | 19   | 37   | 59   |
| 14319 | 56    | 60.5 | 25.5 | 93.5  | 26.5  | 62    | 37.5 | 36   | 49   |
| 14320 | 43    | 44   | 21   | 79    | 34    | 55    | 11   | 32   | 40   |
| 14321 | 45.5  | 53   | 23   | 94.5  | 32.5  | 68    | 15   | 36   | 51   |
| 14322 | 57    | 62   | 28   | 104.5 | 29    | 80    | 16.5 | 45.5 | 70   |
| 14323 | 51    | 52   | 34   | 85    | 30    | 62    | 15   | 34.5 | 52.5 |
| 14324 | 65.5  | 77   | 29   | 101   | 102   | 68.5  | 26   | 47   | 68   |
| 14325 | 53    | 69   | 24   | 101   | 28    | 63    | 19   | 39   | 56.5 |
| 14326 | 76    | 102  | 32.5 | 129.5 | 48    | 85.5  | 50   | 53   | 92.5 |
| 14327 | 37    | 35   | 21   | 80    | 20.5  | 51    | 8    | 26   | 42   |
| 14328 | 62    | 63   | 25   | 98    | 32    | 70    | 17   | 37   | 67   |
| 14329 | 58    | 69   | 31   | 115   | 35.5  | 67    | 24   | 46   | 56   |
| 14330 | 50    | 48.5 | 25   | 84    | 30    | 59    | 13   | 33   | 44   |
| 14331 | 51    | 59   | 30.5 | 95    | 27    | 62.5  | 16   | 38   | 56   |
| 14332 | 53    | 73   | 23.5 | 109   | 28    | 72    | 20   | 43   | 59   |
| 14333 | 74    | 71   | 27   | 112.5 | 30.5  | 64    | 19   | 46   | 61   |

|       |       |      |      |       |      |      |     |      |      |
|-------|-------|------|------|-------|------|------|-----|------|------|
| 14334 | 70    | 72   | 31   | 126   | 26   | 94   | 19  | 42   | 65.5 |
| 14335 | 49    | 62   | 22   | 96    | 24   | 67   | 12  | 37   | 71   |
| 14336 | 56.5  | 59   | 24   | 97    | 31   | 59   | 14  | 36   | 55   |
| 14337 | 52    | 58   | 30   | 91.5  | 24.5 | 67   | 17  | 35   | 64   |
| 14338 | 49    | 57   | 21.5 | 94    | 26   | 58   | 15  | 36   | 49   |
| 14339 | 59    | 62.5 | 26.5 | 102   | 29   | 64   | 19  | 38   | 54   |
| 14340 | 37.5  | 45   | 20   | 76    | 28   | 49   | 11  | 29   | 43   |
| 14341 | 48    | 67   | 30   | 101.5 | 31   | 60   | 18  | 37.5 | 57   |
| 14342 | 53    | 76.5 | 27   | 121   | 65.5 | 69.5 | 28  | 42   | 109  |
| 14343 | 33    | 35   | 15   | 56    | 15   | 46   | 5   | 25   | 27.5 |
| 14344 | 42    | 35   | 19   | 60    | 27   | 52   | 7   | 26   | 33   |
| 14345 | 31    | 33   | 15   | 40.5  | 14   | 49   | 5   | 22   | 34   |
| 14346 | 35.5  | 35   | 19   | 85    | 15   | 47.5 | 6   | 25   | 26   |
| 14347 | 33    | 36   | 18   | 45.5  | 14   | 51.5 | 7   | 23   | 30   |
| 14348 | 38.5  | 36   | 20   | 54    | 15   | 59.5 | 7   | 24   | 31   |
| 14349 | 27    | 30   | 16   | 56.5  | 17   | 45.5 | 5   | 20.5 | 25   |
| 14350 | 28    | 34   | 15.5 | 42    | 12   | 45.5 | 6   | 22   | 26   |
| 14351 | 36    | 33   | 17   | 66    | 12   | 47   | 5.5 | 25   | 29   |
| 14352 | 42    | 31   | 16   | 59.5  | 13   | 45   | 6   | 24   | 25   |
| 14353 | 34    | 29.5 | 17   | 59.5  | 12   | 43   | 6   | 24.5 | 28.5 |
| 14354 | 30    | 39   | 22   | 53    | 26   | 51   | 8   | 28   | 30   |
| 14355 | 30    | 31   | 19   | 55.5  | 18   | 47   | 6   | 26   | 28   |
| 14356 | 35    | 32   | 16   | 67    | 13   | 52   | 6   | 24   | 29   |
| 14357 | 35    | 28   | 16   | 57    | 14   | 45   | 10  | 23   | 29   |
| 14358 | 33    | 31   | 19   | 74.5  | 13   | 45   | 6   | 24   | 27   |
| 14359 | 29.5  | 34   | 14   | 63.5  | 20   | 51   | 6   | 28.5 | 28   |
| 14360 | 37    | 34   | 18   | 54    | 15.5 | 47.5 | 7   | 26   | 28   |
| 14361 | 36    | 34   | 18.5 | 67    | 15   | 48   | 6   | 24.5 | 34.5 |
| 14362 | 59    | 32   | 16   | 52    | 18   | 45   | 7   | 31   | 26   |
| 14363 | 57.5  | 42   | 19   | 80    | 20   | 52   | 8   | 26   | 90   |
| 14364 | 33.5  | 33   | 18   | 65.5  | 15   | 42   | 6   | 23   | 37   |
| 14365 | 41    | 29   | 19   | 90.5  | 28   | 42   | 12  | 24   | 27   |
| 14366 | 41    | 33   | 20   | 114   | 36   | 50   | 24  | 31   | 41   |
| 14367 | 113.5 | 31   | 16   | 49.5  | 26   | 47.5 | 10  | 23   | 45   |
| 14368 | 63.5  | 35   | 19   | 58.5  | 54   | 55.5 | 8   | 32   | 34   |
| 14369 | 86    | 37   | 20   | 52    | 19   | 54   | 13  | 27   | 46   |
| 14370 | 59    | 32   | 26   | 56    | 78   | 50   | 7   | 23   | 45   |
| 14371 | 51.5  | 32   | 19   | 59    | 21   | 47   | 9   | 24   | 37.5 |
| 14372 | 51.5  | 25   | 16   | 57    | 67   | 32.5 | 9   | 21   | 26   |
| 14373 | 39    | 32   | 19   | 66.5  | 27.5 | 44   | 12  | 24   | 62.5 |
| 14374 | 49.5  | 32   | 22   | 84    | 19   | 42   | 9   | 25   | 82.5 |
| 14375 | 38    | 28   | 14   | 53    | 18   | 42   | 10  | 24   | 24   |
| 14376 | 30    | 29.5 | 18   | 71.5  | 19   | 45   | 7   | 26.5 | 27   |
| 14377 | 47.5  | 28.5 | 15.5 | 62    | 15   | 41   | 17  | 21.5 | 27   |
| 14378 | 31    | 31.5 | 16   | 53    | 13   | 46   | 5   | 21.5 | 28   |
| 14379 | 37    | 30   | 18   | 76    | 18   | 47   | 7   | 26   | 32   |
| 14380 | 37    | 28   | 18.5 | 69    | 19   | 39   | 6   | 21   | 43   |

|       |      |      |      |       |      |      |      |      |       |
|-------|------|------|------|-------|------|------|------|------|-------|
| 14381 | 38.5 | 26   | 17   | 60.5  | 19   | 34   | 9    | 24   | 130.5 |
| 14382 | 41.5 | 28   | 20   | 66.5  | 15   | 41   | 8    | 22   | 31    |
| 14383 | 40   | 33   | 20   | 89    | 29   | 52   | 14   | 30   | 50    |
| 14384 | 38   | 37   | 20   | 71    | 22   | 45.5 | 11   | 26.5 | 173   |
| 14385 | 44   | 28   | 15   | 55    | 18   | 41   | 7    | 21   | 49    |
| 14386 | 41.5 | 31   | 20   | 67    | 20   | 41   | 16   | 30   | 28    |
| 14387 | 29   | 27   | 16   | 49    | 49.5 | 42   | 5.5  | 21   | 47    |
| 14388 | 42   | 27   | 21   | 78.5  | 25   | 43   | 7    | 24   | 52    |
| 14389 | 41   | 30   | 16   | 60    | 17   | 45   | 7    | 25   | 33    |
| 14390 | 38.5 | 30   | 17   | 105   | 17   | 45   | 9    | 51   | 34    |
| 14391 | 30.5 | 27   | 15   | 51    | 13   | 41   | 5    | 21   | 23    |
| 14392 | 38   | 31   | 18   | 77    | 58.5 | 43   | 8    | 33   | 24    |
| 14393 | 37   | 33   | 24   | 77.5  | 98   | 46.5 | 7    | 25   | 54.5  |
| 14394 | 32   | 29   | 17   | 73    | 576  | 41.5 | 6    | 25   | 26    |
| 14395 | 31   | 24   | 14   | 51    | 92   | 34   | 5    | 16   | 24    |
| 14396 | 28   | 24   | 16   | 62    | 15   | 35   | 5    | 21   | 23    |
| 14397 | 41.5 | 29   | 15   | 47    | 15   | 47   | 6    | 22   | 29    |
| 14398 | 36   | 33   | 19   | 66    | 31   | 44   | 8    | 30   | 58    |
| 14399 | 41.5 | 31   | 18   | 67    | 15   | 52   | 10   | 31   | 43    |
| 14400 | 41   | 34   | 16   | 67    | 46.5 | 43   | 9    | 25   | 32    |
| 14401 | 43   | 41   | 23   | 167   | 24   | 52.5 | 7.5  | 48   | 41    |
| 14402 | 70   | 40   | 29   | 97    | 23.5 | 59.5 | 14.5 | 41   | 56    |
| 14403 | 23   | 26.5 | 14   | 47.5  | 12   | 35   | 4    | 21   | 28    |
| 14404 | 42   | 30   | 17   | 56.5  | 20   | 43.5 | 8    | 31   | 35    |
| 14405 | 66   | 33   | 21   | 82.5  | 29   | 47   | 9    | 28   | 49    |
| 14406 | 44   | 34   | 21   | 135   | 19   | 47   | 7    | 31   | 87.5  |
| 14407 | 41.5 | 32   | 17   | 56.5  | 58.5 | 49.5 | 10   | 27   | 36    |
| 14408 | 48.5 | 44   | 40   | 105   | 28   | 49   | 12   | 90   | 37    |
| 14409 | 47.5 | 29   | 16   | 50.5  | 17   | 40   | 10   | 23   | 28    |
| 14410 | 27   | 25.5 | 13   | 61    | 11   | 39   | 6    | 18   | 23    |
| 14411 | 54.5 | 75   | 26   | 102   | 28   | 65.5 | 23   | 39   | 66.5  |
| 14412 | 47   | 52.5 | 20   | 88    | 21   | 51.5 | 15   | 30   | 57    |
| 14413 | 49   | 40   | 19   | 80.5  | 22   | 55   | 12   | 29   | 47    |
| 14414 | 43   | 41   | 19   | 99    | 24   | 48   | 9    | 26   | 83    |
| 14415 | 52   | 78   | 20   | 99.5  | 32   | 60   | 22   | 41.5 | 111   |
| 14416 | 43   | 43   | 19   | 92    | 19   | 45   | 11   | 28   | 44    |
| 14417 | 73.5 | 74   | 27   | 128.5 | 31   | 61   | 18   | 36   | 59    |
| 14418 | 43   | 54   | 20.5 | 91.5  | 23.5 | 48.5 | 15   | 29   | 48    |
| 14419 | 53   | 61   | 25   | 103   | 28   | 57.5 | 18   | 38   | 45.5  |
| 14420 | 33   | 25   | 15   | 61    | 14   | 37   | 6    | 18.5 | 29    |
| 14421 | 44   | 58   | 21   | 101.5 | 22   | 56   | 15   | 31   | 60    |
| 14422 | 43   | 53   | 18   | 112   | 36.5 | 53   | 14   | 32   | 80.5  |
| 14423 | 63   | 94   | 27   | 146.5 | 32   | 64.5 | 27   | 50   | 95    |
| 14424 | 62.5 | 88   | 27   | 134   | 41   | 65   | 27   | 49   | 75.5  |
| 14425 | 60   | 71   | 24   | 92.5  | 23   | 75   | 19   | 42   | 56    |
| 14426 | 47   | 51   | 21   | 91.5  | 25   | 55   | 15   | 31   | 45    |
| 14427 | 45   | 47   | 22   | 103   | 30   | 49   | 14   | 30.5 | 51.5  |

|       |       |      |      |       |      |       |      |      |       |
|-------|-------|------|------|-------|------|-------|------|------|-------|
| 14428 | 37    | 35   | 18   | 79    | 19   | 41    | 9    | 23   | 48    |
| 14429 | 45.5  | 51   | 20   | 93.5  | 25   | 49    | 17   | 31   | 67    |
| 14430 | 44    | 56   | 28   | 89    | 23.5 | 55    | 20   | 34.5 | 47    |
| 14431 | 50.5  | 59   | 24.5 | 100   | 29   | 59    | 16   | 36   | 57    |
| 14432 | 53.5  | 56   | 22   | 92.5  | 23   | 52    | 16   | 33.5 | 64    |
| 14433 | 68    | 44   | 18   | 79    | 20.5 | 47    | 13   | 28   | 44    |
| 14434 | 48.5  | 41   | 17   | 110.5 | 19   | 43    | 11   | 23   | 39    |
| 14435 | 46    | 46.5 | 23   | 78    | 23.5 | 57    | 16   | 33   | 45    |
| 14436 | 38.5  | 45   | 20   | 75    | 19.5 | 45    | 10   | 26   | 41    |
| 14437 | 43.5  | 50.5 | 18   | 84    | 19   | 49    | 12   | 28   | 37.5  |
| 14438 | 44.5  | 61   | 22   | 94    | 29   | 51    | 18   | 34   | 47    |
| 14439 | 39    | 44.5 | 21   | 79    | 20   | 47    | 12   | 26   | 38.5  |
| 14440 | 59    | 52   | 19   | 89    | 30   | 49.5  | 11   | 28   | 46.5  |
| 14441 | 44    | 57   | 23   | 84.5  | 25   | 49    | 20   | 35   | 50    |
| 14442 | 68    | 63   | 20   | 90    | 23.5 | 73    | 14.5 | 36   | 55    |
| 14443 | 44    | 55   | 22   | 93.5  | 26   | 53    | 16   | 31   | 47.5  |
| 14444 | 44    | 43   | 21   | 101   | 19.5 | 47    | 14   | 31.5 | 53    |
| 14445 | 45    | 55   | 19   | 99    | 24   | 52    | 15   | 31.5 | 60    |
| 14446 | 43    | 44   | 17   | 88    | 19.5 | 51.5  | 13   | 29.5 | 38    |
| 14447 | 51.5  | 55   | 22   | 83    | 24   | 57    | 15.5 | 33   | 68    |
| 14448 | 38.5  | 46   | 17   | 94.5  | 19   | 46    | 12   | 26   | 37    |
| 14449 | 44    | 52   | 18   | 118   | 20   | 65    | 12   | 28   | 38    |
| 14450 | 41    | 52   | 18.5 | 80    | 20   | 50    | 16   | 30   | 57    |
| 14451 | 35    | 35   | 18   | 73    | 15   | 43    | 10   | 24   | 35    |
| 14452 | 36    | 43   | 17   | 89    | 20   | 46.5  | 11   | 29.5 | 51    |
| 14453 | 47.5  | 54   | 23.5 | 115   | 25   | 46.5  | 41   | 33   | 48    |
| 14454 | 40.5  | 35   | 19   | 86    | 21   | 49    | 15   | 30   | 35    |
| 14455 | 46    | 45   | 20   | 89    | 24   | 53    | 11   | 30   | 44    |
| 14456 | 45    | 44   | 21   | 80    | 17   | 43    | 10   | 26   | 44    |
| 14457 | 37    | 39   | 15   | 82    | 18   | 43    | 10   | 25.5 | 47    |
| 14458 | 60.5  | 84   | 27   | 138.5 | 40   | 67    | 24   | 46   | 70    |
| 14459 | 53    | 54   | 17   | 83    | 21   | 72.5  | 12   | 32.5 | 52    |
| 14460 | 41.5  | 43   | 22   | 93    | 21   | 51    | 11   | 29   | 42    |
| 14461 | 45    | 44   | 23   | 79    | 21   | 54    | 10   | 27   | 35    |
| 14462 | 36    | 35.5 | 28   | 83.5  | 16   | 41    | 9    | 23   | 28    |
| 14463 | 354.5 | 182  | 26   | 96    | 22   | 546.5 | 14   | 82   | 135   |
| 14464 | 144.5 | 219  | 50   | 201   | 60   | 272   | 36   | 133  | 167.5 |
| 14465 | 119   | 170  | 43   | 221   | 41   | 277   | 21   | 109  | 135.5 |
| 14466 | 146   | 167  | 37   | 160   | 40   | 247.5 | 19   | 100  | 205   |
| 14467 | 243.5 | 154  | 42   | 143   | 36   | 232   | 63   | 106  | 135   |
| 14468 | 112.5 | 174  | 47   | 233   | 40.5 | 244   | 20.5 | 111  | 153.5 |
| 14469 | 110   | 168  | 43.5 | 172   | 72   | 223   | 21   | 101  | 127   |
| 14470 | 103   | 149  | 38   | 134   | 37   | 201   | 20   | 90   | 110   |
| 14471 | 183   | 169  | 35   | 100   | 139  | 298   | 11   | 103  | 111   |
| 14472 | 83    | 146  | 111  | 124   | 32.5 | 217   | 233  | 98   | 99    |
| 14473 | 91    | 135  | 36   | 156   | 60   | 220   | 16   | 93   | 107.5 |
| 14474 | 76.5  | 136  | 39   | 113   | 37   | 207   | 15   | 86   | 88    |

|       |       |       |      |       |      |       |      |       |       |
|-------|-------|-------|------|-------|------|-------|------|-------|-------|
| 14475 | 95    | 136.5 | 35   | 137   | 35   | 195   | 14   | 90    | 108   |
| 14476 | 99    | 146   | 43   | 108   | 38.5 | 224.5 | 22   | 104   | 107   |
| 14477 | 281   | 150   | 41   | 135.5 | 39   | 216   | 24.5 | 93.5  | 99    |
| 14478 | 63    | 128   | 31   | 86    | 19   | 186   | 9    | 75.5  | 91    |
| 14479 | 123   | 142   | 40.5 | 115.5 | 167  | 208   | 20   | 95.5  | 107   |
| 14480 | 111   | 142   | 40   | 137   | 39   | 199   | 30   | 91    | 107   |
| 14481 | 70    | 119   | 30   | 134   | 25   | 194   | 11   | 79    | 89.5  |
| 14482 | 93    | 144   | 38   | 175   | 65   | 205   | 14   | 99    | 96.5  |
| 14483 | 214   | 143.5 | 39   | 140.5 | 35   | 328   | 19   | 108.5 | 209   |
| 14484 | 96.5  | 136   | 36   | 126   | 24   | 203   | 14   | 88    | 137.5 |
| 14485 | 86    | 141   | 31.5 | 109   | 46   | 207   | 13   | 86    | 93    |
| 14486 | 95    | 142.5 | 38   | 135.5 | 50   | 213.5 | 11   | 98    | 131   |
| 14487 | 148.5 | 155   | 46   | 140   | 96   | 248   | 21   | 106.5 | 109   |
| 14488 | 77.5  | 146   | 35.5 | 124   | 31   | 212   | 16   | 95    | 106   |
| 14489 | 78.5  | 130   | 31   | 107   | 24   | 194   | 11   | 79.5  | 100   |
| 14490 | 122.5 | 129   | 46   | 150   | 45   | 196   | 18   | 85    | 84.5  |
| 14491 | 96    | 130   | 38   | 127   | 29   | 199   | 14   | 84    | 117   |
| 14492 | 193   | 406   | 59   | 386.5 | 90   | 295   | 89   | 186.5 | 277   |
| 14493 | 88    | 129   | 41   | 351.5 | 41   | 190   | 15   | 94    | 108   |
| 14494 | 86    | 131   | 36.5 | 107   | 25   | 172.5 | 11   | 83.5  | 160.5 |
| 14495 | 258.5 | 155   | 52   | 107   | 60   | 290   | 22   | 90    | 115   |
| 14496 | 107.5 | 129   | 37   | 137   | 57   | 191   | 13   | 90    | 117.5 |
| 14497 | 89.5  | 149.5 | 36   | 158.5 | 29   | 203   | 16   | 88.5  | 116   |
| 14498 | 82    | 122   | 36   | 135.5 | 24   | 180.5 | 13   | 83    | 99    |
| 14499 | 72    | 122   | 32   | 108.5 | 28   | 197   | 11   | 85    | 103   |
| 14500 | 67    | 125   | 29   | 107.5 | 24   | 197   | 10   | 84    | 85    |
| 14501 | 71    | 117   | 31   | 103   | 21.5 | 180   | 10   | 75.5  | 86.5  |
| 14502 | 74    | 123   | 30.5 | 96.5  | 24   | 184.5 | 9.5  | 88.5  | 82    |
| 14503 | 85    | 126   | 31   | 127   | 29   | 181   | 21   | 79    | 115.5 |
| 14504 | 80.5  | 119   | 37   | 149.5 | 32.5 | 193   | 12   | 92    | 120   |
| 14505 | 115   | 120   | 34   | 110.5 | 34   | 183   | 12   | 86    | 105.5 |
| 14506 | 98.5  | 119   | 33   | 124   | 24   | 155   | 13   | 72    | 103   |
| 14507 | 90    | 113.5 | 62   | 120.5 | 34   | 174   | 14   | 74.5  | 98    |
| 14508 | 73    | 127   | 36   | 176   | 46   | 179   | 23   | 83    | 96    |
| 14509 | 76    | 120   | 31   | 96    | 62   | 176   | 19   | 82    | 94    |
| 14510 | 535.5 | 110   | 30   | 104   | 30   | 176.5 | 12   | 73    | 79    |
| 14511 | 89    | 126.5 | 31   | 142   | 46   | 191   | 15   | 74    | 80    |
| 14512 | 171.5 | 118   | 29   | 127   | 90.5 | 195   | 15   | 81    | 89    |
| 14513 | 471   | 107.5 | 34   | 92    | 37   | 172   | 18   | 82.5  | 87    |
| 14514 | 79    | 108   | 28   | 102   | 27.5 | 176   | 11   | 76    | 77    |
| 14515 | 77    | 106   | 33   | 136.5 | 24   | 172   | 47.5 | 78    | 80    |
| 14516 | 70    | 99    | 32   | 146   | 26   | 173.5 | 16   | 71    | 98    |
| 14517 | 70    | 113   | 28   | 125   | 24   | 166   | 10   | 74    | 85    |
| 14518 | 106   | 118   | 35.5 | 113   | 26   | 178   | 12.5 | 222   | 72    |
| 14519 | 71    | 115.5 | 30   | 94    | 21.5 | 167   | 9    | 71    | 79    |
| 14520 | 130   | 155   | 44   | 170   | 64   | 204   | 32   | 115   | 138   |
| 14521 | 67    | 85    | 25   | 77    | 25   | 144   | 15   | 60    | 68.5  |

|       |       |       |      |       |      |       |      |       |       |
|-------|-------|-------|------|-------|------|-------|------|-------|-------|
| 14522 | 463.5 | 212   | 33   | 317   | 37   | 693   | 20.5 | 155.5 | 275   |
| 14523 | 106.5 | 115   | 33   | 148.5 | 26   | 168   | 28   | 194   | 87.5  |
| 14524 | 71    | 112   | 29   | 152   | 30   | 179   | 199  | 100   | 102.5 |
| 14525 | 91    | 116   | 31   | 138   | 25   | 179   | 12   | 74    | 84    |
| 14526 | 93    | 119.5 | 32   | 94.5  | 35   | 178   | 20   | 119.5 | 90    |
| 14527 | 100   | 124   | 30   | 104   | 30   | 194.5 | 22   | 78    | 81.5  |
| 14528 | 77    | 118   | 31   | 79    | 69.5 | 179   | 13   | 85    | 84    |
| 14529 | 186   | 100   | 33   | 105.5 | 32.5 | 162.5 | 36   | 73    | 76    |
| 14530 | 67    | 85    | 29   | 126   | 76   | 137   | 58   | 66    | 75    |
| 14531 | 81    | 125.5 | 31   | 118.5 | 26   | 173.5 | 15   | 77    | 140   |
| 14532 | 74    | 102   | 29   | 108.5 | 25   | 156.5 | 14   | 78    | 78    |
| 14533 | 101   | 111.5 | 28   | 114   | 20   | 172.5 | 9    | 84    | 73    |
| 14534 | 101.5 | 108   | 28   | 98    | 27   | 169.5 | 19   | 69    | 71.5  |
| 14535 | 123   | 218   | 53   | 219.5 | 47   | 254   | 28   | 126.5 | 141   |
| 14536 | 123   | 193   | 56   | 182   | 48   | 263   | 25   | 116   | 152.5 |
| 14537 | 123   | 231   | 68   | 198   | 48.5 | 269   | 27   | 253   | 176   |
| 14538 | 118   | 237   | 53   | 225   | 49   | 292   | 30.5 | 137.5 | 190   |
| 14539 | 96    | 247   | 41   | 237   | -1   | 321   | 23.5 | 126.5 | 165   |
| 14540 | 158.5 | 211   | 60.5 | 222   | 65   | 309   | 25   | 137   | 153   |
| 14541 | 159   | 221   | 55   | 208   | 45   | 281.5 | 27   | 137   | 192   |
| 14542 | 139   | 276   | 69   | 237   | 59   | 332   | 42.5 | 156   | 199.5 |
| 14543 | 148   | 271.5 | 86   | 308   | 106  | 278   | 74.5 | 143.5 | 200   |
| 14544 | 110.5 | 148   | 61   | 203   | 35   | 222.5 | 20   | 104   | 152   |
| 14545 | 114   | 216   | 52   | 226   | 50   | 265   | 26   | 129   | 143   |
| 14546 | 121   | 201.5 | 54   | 220.5 | 42   | 273   | 22   | 126.5 | 150   |
| 14547 | 256   | 246   | 60.5 | 240.5 | 64   | 554.5 | 31   | 154   | 190   |
| 14548 | 146   | 247   | 63   | 259   | 57.5 | 307.5 | 39.5 | 181   | 175.5 |
| 14549 | 149   | 254   | 76.5 | 262   | 68   | 294   | 41   | 152.5 | 187   |
| 14550 | 152   | 254   | 67.5 | 252.5 | 67   | 323   | 49   | 148   | 200   |
| 14551 | 204   | 245   | 63.5 | 248.5 | 63.5 | 351   | 36   | 144   | 176   |
| 14552 | 178   | 226.5 | 56   | 216   | 74.5 | 346.5 | 46   | 129   | 163   |
| 14553 | 142   | 230   | 79   | 235   | 71   | 259   | 43.5 | 142   | 187   |
| 14554 | 121   | 208   | 58   | 206.5 | 55.5 | 275   | 27   | 144   | 173   |
| 14555 | 134   | 251   | 59   | 234   | 73   | 256   | 37   | 137   | 171   |
| 14556 | 133   | 201.5 | 58.5 | 264   | 54   | 283   | 28   | 133   | 176   |
| 14557 | 130   | 218   | 55   | 222   | 42   | 295   | 24   | 137   | 173   |
| 14558 | 113   | 202   | 55   | 225.5 | 49   | 260.5 | 29   | 130   | 239   |
| 14559 | 140   | 259   | 57   | 290   | 64   | 270   | 45   | 142   | 178   |
| 14560 | 181   | 326   | 67   | 295   | 65   | 414.5 | 51   | 236   | 226   |
| 14561 | 209   | 226   | 49   | 210   | 45   | 399   | 37   | 133.5 | 168   |
| 14562 | 115.5 | 190   | 55   | 219   | 46   | 253   | 33   | 132   | 146   |
| 14563 | 126   | 218   | 62   | 238   | 52.5 | 276   | 34   | 136   | 190   |
| 14564 | 124   | 204   | 50   | 205   | 56   | 281   | 31   | 131   | 150   |
| 14565 | 193   | 249   | 57   | 252   | 54   | 369.5 | 38   | 139   | 191.5 |
| 14566 | 106   | 190   | 54   | 166   | 41   | 249.5 | 25   | 111   | 151   |
| 14567 | 154   | 243   | 52   | 280   | 59   | 264   | 43   | 134.5 | 186.5 |
| 14568 | 108.5 | 172.5 | 48   | 211   | 46.5 | 217   | 27   | 108   | 150.5 |



|       |       |       |      |       |       |       |      |       |       |
|-------|-------|-------|------|-------|-------|-------|------|-------|-------|
| 14569 | 140.5 | 199   | 53   | 210.5 | 51    | 256   | 34   | 124   | 144   |
| 14570 | 105   | 166   | 49.5 | 205   | 47    | 253   | 23   | 103   | 159   |
| 14571 | 112   | 216   | 52.5 | 243   | 45    | 256   | 31   | 128   | 181   |
| 14572 | 104   | 185.5 | 48   | 186.5 | 40.5  | 246.5 | 23   | 141   | 187   |
| 14573 | 117   | 193   | 47.5 | 230   | 56    | 253.5 | 31   | 117   | 171   |
| 14574 | 127   | 194   | 61   | 219   | 54    | 251   | 45   | 117   | 167   |
| 14575 | 124   | 213   | 54   | 188.5 | 71    | 264   | 30   | 114   | 181   |
| 14576 | 114.5 | 195   | 52   | 223.5 | 56.5  | 243.5 | 36   | 121.5 | 148   |
| 14577 | 106.5 | 178   | 43.5 | 199   | 71    | 250   | 28   | 111   | 168   |
| 14578 | 112.5 | 195   | 47   | 189.5 | 41.5  | 260   | 26.5 | 119   | 144   |
| 14579 | 102   | 187.5 | 45   | 198   | 39    | 246   | 21   | 115.5 | 157   |
| 14580 | 121   | 145.5 | 49   | 175   | 50    | 214   | 24   | 96    | 111   |
| 14581 | 104.5 | 160   | 44   | 185.5 | 38    | 208   | 25   | 98    | 121   |
| 14582 | 81.5  | 142   | 40   | 146   | 23    | 216   | 12   | 96.5  | 112.5 |
| 14583 | 75.5  | 141   | 31   | 144   | 21    | 207   | 11   | 85.5  | 88    |
| 14584 | 102   | 137   | 60   | 408   | 38    | 206   | 67   | 110.5 | 91.5  |
| 14585 | 92    | 152   | 42   | 169   | 29    | 222   | 17   | 86    | 118   |
| 14586 | 96    | 169   | 39   | 177.5 | 27    | 236   | 16   | 103   | 130   |
| 14587 | 84    | 144.5 | 36   | 142.5 | 31    | 206   | 14   | 87.5  | 93    |
| 14588 | 89.5  | 129   | 32   | 123   | 32    | 198   | 14   | 90    | 85    |
| 14589 | 88    | 117   | 46   | 247   | 38    | 170   | 55   | 125   | 81    |
| 14590 | 76    | 130   | 40   | 144   | 57    | 198   | 31   | 84.5  | 137   |
| 14591 | 83    | 146   | 40   | 241   | 26    | 219   | 63.5 | 102   | 175.5 |
| 14592 | 84    | 107.5 | 44   | 221   | 34    | 171   | 15   | 82.5  | 116.5 |
| 14593 | 104   | 152   | 53   | 228   | 40    | 253   | 19   | 121   | 150   |
| 14594 | 89    | 175   | 39   | 168.5 | 25    | 250.5 | 18   | 118   | 181   |
| 14595 | 86    | 147.5 | 38   | 149   | 36    | 236   | 18   | 98    | 106   |
| 14596 | 96    | 127.5 | 38   | 187.5 | 47    | 193.5 | 31   | 106   | 117.5 |
| 14597 | 94    | 136   | 34   | 132   | 42    | 207   | 15   | 87    | 105   |
| 14598 | 128   | 144   | 34   | 108   | 24    | 217   | 14   | 82.5  | 88    |
| 14599 | 330   | 161   | 35   | 123   | 34    | 636.5 | 25   | 110   | 147   |
| 14600 | 86    | 100   | 35   | 100.5 | 29    | 146   | 15   | 66    | 82    |
| 14601 | 96    | 158   | 43   | 248   | 37    | 237.5 | 17   | 111   | 139   |
| 14602 | 80.5  | 137.5 | 38   | 131   | 24    | 194   | 12   | 87    | 86.5  |
| 14603 | 81.5  | 149.5 | 42   | 138   | 31    | 236.5 | 14   | 95    | 99    |
| 14604 | 75    | 134   | 35.5 | 117   | 32    | 212   | 13   | 91.5  | 84    |
| 14605 | 94.5  | 131   | 29.5 | 153   | 22    | 200   | 32   | 82.5  | 81    |
| 14606 | 73    | 143   | 33   | 131   | 22    | 211   | 11   | 87    | 92.5  |
| 14607 | 123.5 | 139   | 42   | 117   | 40.5  | 205.5 | 40.5 | 89    | 115.5 |
| 14608 | 337   | 125   | 39   | 144   | 132.5 | 200   | 16   | 105.5 | 85    |
| 14609 | 88.5  | 142   | 41.5 | 145   | 40.5  | 218   | 29   | 97    | 129   |
| 14610 | 98    | 138   | 30   | 104   | 25    | 197.5 | 10   | 82    | 87    |
| 14611 | 85    | 141   | 42.5 | 137.5 | 31    | 236.5 | 14   | 98    | 108.5 |
| 14612 | 92    | 110   | 37   | 93.5  | 27.5  | 177   | 15   | 80    | 95.5  |
| 14613 | 79    | 114.5 | 36   | 119   | 63.5  | 176   | 16   | 76.5  | 74    |
| 14614 | 88    | 121.5 | 34   | 207.5 | 71    | 196   | 319  | 95    | 80.5  |
| 14615 | 276.5 | 154.5 | 41   | 155   | 28.5  | 378   | 18.5 | 95    | 138   |

|       |       |       |      |       |      |       |       |      |       |
|-------|-------|-------|------|-------|------|-------|-------|------|-------|
| 14616 | 71.5  | 128   | 33   | 103.5 | 44   | 176.5 | 12.5  | 80   | 92    |
| 14617 | 143   | 148   | 58   | 150.5 | 46   | 230.5 | 20.5  | 118  | 96    |
| 14618 | 82    | 150.5 | 37   | 161   | 27   | 230   | 13    | 90   | 126   |
| 14619 | 86    | 157   | 35.5 | 143   | 27   | 200.5 | 17    | 88   | 110   |
| 14620 | 71.5  | 121   | 33   | 130.5 | 23   | 183   | 12    | 78.5 | 84.5  |
| 14621 | 70.5  | 122   | 31   | 131.5 | 29   | 187   | 12    | 80   | 71.5  |
| 14622 | 103   | 145   | 37   | 134   | 40   | 211   | 11    | 105  | 105   |
| 14623 | 71    | 136   | 31   | 142   | 24.5 | 181   | 15    | 76.5 | 117.5 |
| 14624 | 192   | 127.5 | 36   | 119   | 33   | 199   | 14    | 91.5 | 91    |
| 14625 | 72    | 119   | 36   | 111.5 | 33   | 194   | 11    | 85.5 | 88    |
| 14626 | 84    | 128   | 38.5 | 118   | 24   | 175   | 14    | 74.5 | 100   |
| 14627 | 149.5 | 112   | 34   | 111   | 32   | 183.5 | 15    | 80   | 114   |
| 14628 | 83    | 114   | 32   | 107   | 93   | 210.5 | 10    | 68   | 97    |
| 14629 | 132.5 | 128   | 140  | 161   | 68.5 | 207   | 31    | 120  | 130   |
| 14630 | 119.5 | 112   | 34   | 97.5  | 237  | 165   | 20    | 82   | 81    |
| 14631 | 75    | 105   | 32   | 99    | 24   | 174   | 17    | 92.5 | 77    |
| 14632 | 80.5  | 122.5 | 38   | 149.5 | 145  | 183.5 | 14    | 79   | 100   |
| 14633 | 85    | 128   | 39   | 181   | 31   | 200   | 12    | 117  | 95    |
| 14634 | 179   | 111   | 33.5 | 104   | 40.5 | 177   | 208.5 | 79   | 79    |
| 14635 | 94    | 136   | 45   | 183.5 | 45   | 192   | 25    | 88.5 | 135   |
| 14636 | 81.5  | 110   | 37   | 147   | 37.5 | 164   | 19    | 80   | 110   |
| 14637 | 97.5  | 150   | 38   | 171.5 | 38   | 203.5 | 25    | 93   | 120   |
| 14638 | 191   | 197   | 39   | 168.5 | 36   | 363   | 19    | 96.5 | 135   |
| 14639 | 106   | 173.5 | 43.5 | 209   | 47.5 | 219   | 31    | 110  | 133   |
| 14640 | 105   | 166   | 40.5 | 178   | 38   | 223   | 24    | 95   | 128   |
| 14641 | 105   | 163.5 | 43   | 177   | 51   | 193   | 27    | 99   | 113   |
| 14642 | 89.5  | 162   | 43   | 179   | 44   | 181   | 23    | 238  | 131   |
| 14643 | 94    | 144   | 37.5 | 162.5 | 37   | 200   | 24    | 87   | 110.5 |
| 14644 | 97    | 173   | 46   | 187   | 43   | 233   | 32    | 109  | 135   |
| 14645 | 128   | 158.5 | 48   | 182.5 | 39   | 202   | 25.5  | 121  | 155   |
| 14646 | 236   | 228.5 | 46   | 209   | 40   | 451   | 27    | 124  | 166   |
| 14647 | 108   | 205   | 51   | 231   | 60   | 241   | 34.5  | 120  | 142   |
| 14648 | 111   | 166   | 44   | 191.5 | 43   | 210   | 30    | 99.5 | 147   |
| 14649 | 82    | 127   | 39   | 134   | 33   | 162   | 22.5  | 75.5 | 123   |
| 14650 | 80    | 140.5 | 36   | 158.5 | 34   | 182   | 20    | 83   | 130   |
| 14651 | 108   | 161.5 | 45   | 212.5 | 42   | 216.5 | 31    | 103  | 121   |
| 14652 | 85.5  | 120   | 50   | 148   | 27   | 166   | 18    | 84   | 111   |
| 14653 | 94.5  | 178   | 41.5 | 175   | 36   | 228   | 24    | 96   | 118   |
| 14654 | 83    | 141   | 38.5 | 171   | 35   | 194   | 21    | 87   | 150   |
| 14655 | 112.5 | 153   | 43   | 176   | 40   | 221.5 | 27    | 95   | 152   |
| 14656 | 95.5  | 145   | 51   | 209   | 36   | 190   | 27    | 94   | 188.5 |
| 14657 | 116   | 127   | 43   | 161   | 36   | 163.5 | 26.5  | 82   | 113   |
| 14658 | 89    | 153   | 43   | 168.5 | 46.5 | 185   | 26    | 92   | 137   |
| 14659 | 100   | 138   | 43   | 194   | 47.5 | 180.5 | 30    | 89   | 162   |
| 14660 | 88.5  | 141   | 61   | 164   | 30   | 192   | 18    | 90.5 | 164   |
| 14661 | 102   | 161   | 43   | 169   | 45   | 217   | 26    | 104  | 126   |
| 14662 | 103.5 | 159   | 45.5 | 184.5 | 38   | 228   | 27    | 107  | 150   |

|       |      |       |      |       |      |       |      |       |       |
|-------|------|-------|------|-------|------|-------|------|-------|-------|
| 14663 | 86   | 136   | 36   | 175.5 | 42   | 171   | 23   | 81    | 121   |
| 14664 | 86.5 | 133   | 38   | 204   | 36.5 | 170   | 27   | 82    | 119   |
| 14665 | 85   | 130   | 34   | 140   | 41.5 | 179   | 22   | 85    | 96    |
| 14666 | 98   | 153.5 | 43   | 193   | 42   | 200   | 28   | 99    | 115   |
| 14667 | 86   | 126   | 36   | 161   | 33   | 166   | 23   | 79    | 99.5  |
| 14668 | 79.5 | 129.5 | 35   | 162   | 55   | 162   | 21.5 | 77    | 99.5  |
| 14669 | 116  | 205   | 50   | 232   | 49.5 | 218.5 | 46   | 127   | 171.5 |
| 14670 | 94   | 178   | 42.5 | 174.5 | 49   | 205   | 26   | 95    | 124   |
| 14671 | 217  | 148   | 46   | 244   | 45   | 200.5 | 34   | 99.5  | 113   |
| 14672 | 82   | 125   | 37   | 148   | 30   | 192   | 21   | 87    | 116.5 |
| 14673 | 65   | 103   | 32   | 172.5 | 26   | 144   | 14   | 72    | 93.5  |
| 14674 | 90   | 120.5 | 46.5 | 198.5 | 35.5 | 150.5 | 22   | 81    | 113.5 |
| 14675 | 104  | 147.5 | 73   | 147   | 41   | 179   | 29   | 86.5  | 128   |
| 14676 | 86   | 158   | 45.5 | 187   | 39.5 | 199.5 | 29   | 102.5 | 148   |
| 14677 | 89   | 150   | 39   | 182   | 38   | 209   | 26   | 96    | 116   |
| 14678 | 88   | 113   | 30   | 103.5 | 23   | 179.5 | 12   | 84.5  | 85    |
| 14679 | 115  | 110   | 32   | 124   | 28   | 170   | 12   | 87    | 124   |
| 14680 | 79   | 113   | 33.5 | 133.5 | 53   | 176   | 131  | 83.5  | 124.5 |
| 14681 | 75   | 102   | 29   | 105   | 20   | 164   | 9.5  | 69.5  | 77    |
| 14682 | 82.5 | 105   | 29   | 105   | 34   | 167   | 16   | 72    | 75    |
| 14683 | 186  | 131   | 53.5 | 266.5 | 58   | 193   | 44   | 108   | 244   |
| 14684 | 74   | 117.5 | 36   | 127.5 | 24   | 177   | 12   | 80.5  | 135   |
| 14685 | 74   | 135   | 31   | 150   | 21   | 201   | 13   | 80    | 128   |
| 14686 | 75   | 125   | 35   | 119   | 25   | 173   | 14   | 81    | 110   |
| 14687 | 64   | 94    | 32   | 120   | 19.5 | 146   | 12   | 80.5  | 197   |
| 14688 | 63   | 102.5 | 27.5 | 113   | 22   | 159.5 | 10   | 67    | 75    |
| 14689 | 66.5 | 104   | 29   | 99    | 19.5 | 150   | 14   | 67    | 81.5  |
| 14690 | 326  | 111   | 28   | 103   | 63   | 158.5 | 14   | 83    | 73    |
| 14691 | 73.5 | 105   | 35   | 155.5 | 26   | 163   | 12   | 76    | 184   |
| 14692 | 74.5 | 110   | 37   | 128   | 23   | 166   | 11.5 | 72    | 128.5 |
| 14693 | 59.5 | 102.5 | 34   | 98    | 28   | 133   | 21   | 59    | 124.5 |
| 14694 | 74   | 108   | 31   | 127.5 | 28   | 176   | 14   | 68    | 75.5  |
| 14695 | 43   | 57    | 22.5 | 125   | 24   | 63    | 12   | 41.5  | 94.5  |
| 14696 | 39.5 | 42    | 21   | 77.5  | 17   | 55.5  | 10   | 34    | 54    |
| 14697 | 39.5 | 42    | 18   | 87    | 17   | 57    | 8    | 33    | 44    |
| 14698 | 53   | 44    | 24   | 99.5  | 20   | 52    | 8    | 36    | 52    |
| 14699 | 43   | 40.5  | 21   | 126   | 24.5 | 54    | 17   | 41    | 37.5  |
| 14700 | 53   | 46    | 28   | 139   | 40   | 61    | 26   | 45    | 48    |
| 14701 | 48.5 | 58    | 23   | 104   | 38   | 65    | 14   | 34    | 57    |
| 14702 | 69   | 59    | 34   | 140.5 | 37.5 | 75    | 23   | 73    | 60.5  |
| 14703 | 36   | 34    | 17   | 67    | 16   | 44    | 6    | 24    | 32    |
| 14704 | 35.5 | 35    | 18   | 58    | 16   | 52    | 8    | 28    | 31    |
| 14705 | 200  | 42    | 24   | 72.5  | 23   | 53    | 14.5 | 33    | 40    |
| 14706 | 61   | 49    | 32   | 67.5  | 31   | 75.5  | 10   | 54.5  | 42    |
| 14707 | 43   | 43    | 20   | 73    | 16   | 56    | 8    | 29.5  | 89.5  |
| 14708 | 62   | 45    | 21   | 99    | 26   | 60    | 12   | 37.5  | 105.5 |
| 14709 | 81   | 54    | 29   | 188   | 136  | 86    | 19   | 81.5  | 76    |

|       |      |       |      |       |      |       |      |      |       |
|-------|------|-------|------|-------|------|-------|------|------|-------|
| 14710 | 45   | 42    | 22.5 | 86    | 41   | 54    | 25   | 34   | 48.5  |
| 14711 | 36   | 36    | 17   | 63    | 18   | 43    | 6    | 27   | 25.5  |
| 14712 | 47   | 35    | 22   | 69    | 30   | 50.5  | 13   | 35   | 32.5  |
| 14713 | 59   | 46    | 25   | 155   | 56   | 53    | 57   | 80.5 | 49    |
| 14714 | 33   | 39    | 17   | 53    | 39   | 55    | 8    | 27   | 26.5  |
| 14715 | 55.5 | 39    | 23   | 146   | 58   | 57    | 28   | 58   | 36.5  |
| 14716 | 63   | 36    | 24   | 153   | 108  | 52    | 82   | 55   | 32    |
| 14717 | 47   | 31    | 23   | 51.5  | 20   | 40.5  | 11   | 25   | 32    |
| 14718 | 497  | 257.5 | 51   | 115.5 | 29.5 | 492.5 | 21   | 139  | 224.5 |
| 14719 | 54   | 36    | 26.5 | 81    | 329  | 72    | 19   | 29.5 | 31    |
| 14720 | 41   | 39    | 22   | 107.5 | 24   | 54    | 9    | 34   | 50.5  |
| 14721 | 31   | 34    | 18   | 51    | 18   | 48    | 7    | 30.5 | 26.5  |
| 14722 | 28   | 40    | 14   | 42.5  | 13   | 48    | 6    | 22.5 | 27    |
| 14723 | 173  | 94    | 34   | 216   | 64   | 73.5  | 40   | 87.5 | 94    |
| 14724 | 100  | 62    | 32   | 95    | 56.5 | 145   | 13   | 75   | 82    |
| 14725 | 33.5 | 34    | 19   | 80.5  | 18   | 45    | 9    | 29.5 | 45    |
| 14726 | 31   | 33    | 17   | 45    | 14   | 50    | 6    | 21   | 26    |
| 14727 | 65.5 | 60    | 36   | 102   | 36.5 | 76    | 23   | 46   | 69    |
| 14728 | 72.5 | 65    | 33.5 | 90.5  | 49.5 | 90    | 18   | 46   | 61.5  |
| 14729 | 81   | 82    | 41   | 131.5 | 36   | 106   | 23   | 53   | 91    |
| 14730 | 79.5 | 88    | 39   | 122   | 44   | 84    | 24   | 53   | 85    |
| 14731 | 69.5 | 71    | 35   | 125   | 37.5 | 82    | 17   | 44   | 64    |
| 14732 | 67   | 73    | 34   | 99.5  | 36   | 80    | 22   | 46   | 81    |
| 14733 | 87   | 87    | 39   | 110.5 | 39   | 104.5 | 24   | 49   | 76.5  |
| 14734 | 173  | 72    | 37   | 117   | 37   | 87    | 24   | 51   | 139   |
| 14735 | 63   | 74    | 33   | 93    | 37   | 80    | 19   | 43   | 66    |
| 14736 | 68   | 75    | 35   | 131   | 44   | 81    | 25   | 51   | 65.5  |
| 14737 | 63   | 87.5  | 38   | 133   | 58   | 73    | 27   | 52   | 87.5  |
| 14738 | 83   | 108   | 50.5 | 170   | 57.5 | 95    | 38   | 69   | 93    |
| 14739 | 81   | 97    | 42   | 143   | 55.5 | 99    | 32   | 65   | 84    |
| 14740 | 88   | 98    | 37   | 172   | 45   | 84    | 30   | 53.5 | 133   |
| 14741 | 59.5 | 61    | 28.5 | 103   | 30   | 79    | 14   | 39   | 55    |
| 14742 | 68.5 | 81    | 37   | 133   | 38   | 86.5  | 24   | 61   | 82.5  |
| 14743 | 55   | 67    | 31   | 107   | 45   | 68    | 19.5 | 42   | 84    |
| 14744 | 83.5 | 70    | 32   | 131   | 43   | 80    | 23   | 48   | 70    |
| 14745 | 68   | 77    | 35   | 127.5 | 50.5 | 77    | 20   | 47   | 71    |
| 14746 | 68   | 86    | 41   | 140   | 43   | 84    | 31   | 52   | 89.5  |
| 14747 | 66   | 74    | 30   | 115   | 31   | 84    | 20   | 47   | 65.5  |
| 14748 | 64   | 64    | 32   | 115   | 39   | 76    | 19   | 40   | 56    |
| 14749 | 52   | 44    | 28   | 83    | 27   | 59    | 14   | 34   | 46.5  |
| 14750 | 63.5 | 55.5  | 30   | 108.5 | 592  | 64    | 17   | 38   | 70    |
| 14751 | 74   | 67    | 34   | 133   | 38   | 71    | 19   | 44   | 67    |
| 14752 | 56.5 | 65    | 37   | 97    | 37   | 72    | 19   | 42.5 | 65    |
| 14753 | 58   | 72    | 30   | 123   | 34   | 71    | 19   | 45   | 129.5 |
| 14754 | 61   | 67    | 32   | 115   | 46   | 73    | 17   | 41.5 | 112.5 |
| 14755 | 67.5 | 87    | 39   | 121   | 57   | 89    | 31   | 52   | 111   |
| 14756 | 84   | 98    | 38.5 | 153   | 69   | 85    | 30   | 56   | 124   |

|       |      |      |      |       |      |      |      |      |       |
|-------|------|------|------|-------|------|------|------|------|-------|
| 14757 | 58   | 70   | 32   | 109   | 40   | 71   | 21   | 42   | 70    |
| 14758 | 66   | 82   | 34.5 | 121.5 | 39   | 85   | 22.5 | 52   | 84    |
| 14759 | 79   | 90   | 35   | 129.5 | 40   | 85   | 27   | 47   | 93    |
| 14760 | 72   | 67   | 47   | 143.5 | 36   | 79.5 | 18   | 47   | 75    |
| 14761 | 66   | 72   | 27   | 119   | 33   | 79   | 17   | 52   | 57.5  |
| 14762 | 56   | 66   | 37   | 112   | 39   | 71   | 23   | 46   | 61    |
| 14763 | 58.5 | 78   | 49   | 127   | 32   | 78.5 | 22   | 47   | 69.5  |
| 14764 | 54   | 67   | 30   | 140   | 33.5 | 74.5 | 16.5 | 45   | 95    |
| 14765 | 82   | 81   | 35.5 | 128.5 | 40   | 85   | 29   | 49.5 | 111.5 |
| 14766 | 64   | 62   | 29   | 101   | 29   | 78   | 16   | 42   | 72    |
| 14767 | 60.5 | 59   | 28   | 83.5  | 26   | 76   | 14   | 39   | 58    |
| 14768 | 56   | 66   | 31   | 103   | 42   | 66   | 17.5 | 43   | 81    |
| 14769 | 65.5 | 60   | 27   | 126   | 32   | 66   | 18   | 42   | 66    |
| 14770 | 69.5 | 74   | 48   | 160   | 69   | 70   | 31   | 91   | 85    |
| 14771 | 54.5 | 67   | 38   | 97.5  | 33   | 73   | 16   | 42   | 62.5  |
| 14772 | 67   | 80   | 45   | 137   | 85.5 | 73   | 26   | 49   | 75.5  |
| 14773 | 71   | 66.5 | 37   | 115   | 28   | 70   | 16   | 40   | 79    |
| 14774 | 77   | 79.5 | 36   | 117   | 43   | 84.5 | 23   | 49   | 72.5  |
| 14775 | 63   | 107  | 42   | 142   | 46   | 85   | 31   | 57   | 95.5  |
| 14776 | 38   | 39   | 25   | 75    | 18   | 53   | 8    | 31.5 | 36.5  |
| 14777 | 40   | 37   | 23   | 62.5  | 15   | 51   | 8    | 101  | 32    |
| 14778 | 32   | 38   | 20   | 46    | 15   | 54   | 6    | 23.5 | 31    |
| 14779 | 66   | 41   | 29   | 106   | 27   | 59.5 | 19   | 37   | 50    |
| 14780 | 32   | 37   | 20.5 | 46    | 42   | 53   | 6    | 25   | 30    |
| 14781 | 40   | 39   | 25   | 95    | 20   | 57   | 12   | 30   | 38    |
| 14782 | 31   | 36   | 20   | 48    | 14   | 54   | 7    | 27   | 29.5  |
| 14783 | 35   | 38   | 18.5 | 48    | 19   | 56.5 | 8    | 28   | 31.5  |
| 14784 | 37.5 | 41.5 | 22   | 56    | 17   | 53   | 10   | 30   | 34    |
| 14785 | 36   | 40   | 23   | 73    | 17   | 56   | 8    | 31   | 33    |
| 14786 | 43   | 42   | 24   | 81    | 379  | 57.5 | 11   | 31   | 32.5  |
| 14787 | 39   | 36   | 21   | 88    | 17   | 51   | 9.5  | 30   | 35    |
| 14788 | 32   | 41   | 22   | 56    | 19   | 49   | 8    | 32   | 28    |
| 14789 | 39   | 38   | 38   | 73    | 20   | 48   | 8    | 29   | 30    |
| 14790 | 31   | 36   | 17   | 48    | 16   | 47   | 6    | 26   | 26    |
| 14791 | 31   | 35   | 19   | 48.5  | 17   | 52   | 7    | 26   | 32    |
| 14792 | 61.5 | 36   | 25   | 80.5  | 18   | 50   | 8    | 26   | 30    |
| 14793 | 41   | 35   | 21.5 | 77.5  | 17   | 51   | 8    | 28   | 31    |
| 14794 | 46   | 37   | 21.5 | 65.5  | 16   | 54   | 7    | 28   | 34    |
| 14795 | 43   | 35   | 23   | 71    | 143  | 49   | 9    | 27   | 52.5  |
| 14796 | 38.5 | 36   | 24.5 | 71    | 20.5 | 49   | 9    | 27   | 44    |
| 14797 | 37   | 35   | 26   | 65    | 20   | 49   | 13   | 28   | 30    |
| 14798 | 39   | 36   | 22   | 58    | 24   | 54   | 9    | 29   | 32    |
| 14799 | 41   | 39   | 22   | 55.5  | 23   | 58   | 17   | 43   | 31    |
| 14800 | 99.5 | 39   | 26   | 98    | 24   | 60.5 | 24   | 30.5 | 45    |
| 14801 | 41   | 35   | 28   | 59    | 35.5 | 49   | 13.5 | 28   | 99    |
| 14802 | 42.5 | 41   | 27   | 102.5 | 19   | 56   | 11   | 46   | 55    |
| 14803 | 39.5 | 37   | 22   | 78    | 28   | 48   | 10   | 28.5 | 49    |

|       |       |      |      |       |      |      |      |      |      |
|-------|-------|------|------|-------|------|------|------|------|------|
| 14804 | 62    | 38   | 22   | 58.5  | 23   | 85   | 9    | 29   | 49   |
| 14805 | 46.5  | 36   | 31.5 | 159   | 26   | 63   | 10   | 29.5 | 41   |
| 14806 | 39.5  | 36   | 24   | 64    | 27   | 48   | 8    | 26   | 33   |
| 14807 | 53    | 28   | 34   | 73    | 56   | 40   | 11   | 28   | 32   |
| 14808 | 46    | 36   | 32   | 53    | 22   | 56   | 8    | 29   | 35   |
| 14809 | 34    | 37   | 21   | 56    | 181  | 51   | 7    | 28   | 32   |
| 14810 | 33    | 31.5 | 21   | 54    | 17.5 | 49.5 | 8    | 27   | 32   |
| 14811 | 33    | 33   | 19   | 56    | 18   | 51   | 7    | 24   | 32   |
| 14812 | 42.5  | 38   | 20   | 69    | 36   | 54   | 8    | 37.5 | 32   |
| 14813 | 33    | 33   | 19.5 | 48    | 21   | 43   | 7    | 23   | 30   |
| 14814 | 42    | 35   | 24   | 89    | 20   | 51   | 9    | 32   | 65.5 |
| 14815 | 66    | 37   | 22   | 78    | 23   | 55.5 | 10   | 28   | 36   |
| 14816 | 62    | 49   | 46.5 | 125.5 | 60   | 58   | 25   | 41   | 85   |
| 14817 | 72    | 50   | 31   | 98    | 27   | 62   | 16   | 39   | 112  |
| 14818 | 64.5  | 34.5 | 27   | 130   | 20   | 49.5 | 10   | 31   | 100  |
| 14819 | 279   | 42   | 24   | 73    | 26   | 51   | 13   | 28.5 | 55.5 |
| 14820 | 34    | 32   | 19   | 49    | 23   | 46   | 9    | 24   | 29   |
| 14821 | 37    | 37.5 | 24   | 76    | 21   | 55   | 8    | 28.5 | 36   |
| 14822 | 44    | 39   | 21   | 64    | 17   | 54   | 9    | 27   | 34   |
| 14823 | 44.5  | 35   | 29   | 214.5 | 289  | 50   | 9    | 32   | 39   |
| 14824 | 40    | 40   | 23   | 66    | 18   | 88   | 8    | 38   | 33   |
| 14825 | 39    | 34   | 23   | 96.5  | 19   | 52   | 8    | 34   | 32   |
| 14826 | 79.5  | 36   | 20   | 54    | 19   | 53   | 12   | 40   | 29   |
| 14827 | 247.5 | 32   | 20   | 55    | 16   | 46   | 17   | 26   | 34   |
| 14828 | 33    | 33   | 16   | 54    | 19   | 45   | 10   | 23   | 28   |
| 14829 | 36    | 33   | 19   | 71.5  | 19   | 51   | 10   | 26   | 32   |
| 14830 | 35    | 35   | 38   | 58    | 59   | 51.5 | 7    | 30   | 34.5 |
| 14831 | 111   | 39   | 22   | 92    | 18   | 57   | 14   | 30   | 57   |
| 14832 | 101   | 35   | 28   | 55    | 23   | 50   | 12   | 30   | 32   |
| 14833 | 39    | 37   | 30   | 58    | 31   | 51   | 9    | 31   | 32   |
| 14834 | 113   | 42   | 25   | 68.5  | 24   | 64   | 16.5 | 37   | 40   |
| 14835 | 32    | 32   | 18   | 48    | 15.5 | 39   | 7    | 25   | 30   |
| 14836 | 53    | 37   | 22   | 60    | 19   | 53.5 | 10   | 26   | 45   |
| 14837 | 50    | 36   | 21   | 53    | 26   | 61   | 11   | 29   | 30   |
| 14838 | 45    | 38   | 26   | 69.5  | 19   | 60   | 8    | 38   | 47   |
| 14839 | 46    | 34   | 29   | 109   | 41   | 56   | 9    | 33   | 96   |
| 14840 | 22    | 17   | 16   | 45    | 10.5 | 21   | 6    | 13   | 18   |
| 14841 | 41    | 33   | 19   | 53    | 15   | 45   | 8    | 27   | 28   |
| 14842 | 71    | 51   | 24   | 53    | 25   | 68   | 13   | 49.5 | 59   |
| 14843 | 41    | 49.5 | 27   | 78    | 25   | 56   | 14   | 33   | 72   |
| 14844 | 62    | 61   | 25   | 90.5  | 25   | 59.5 | 20   | 35   | 54   |
| 14845 | 58    | 62   | 24   | 83    | 24   | 75   | 14.5 | 36   | 62.5 |
| 14846 | 49    | 65   | 27   | 93    | 25   | 66   | 53   | 39   | 84   |
| 14847 | 80    | 65   | 27.5 | 108   | 27.5 | 96.5 | 14   | 36   | 64   |
| 14848 | 44    | 44   | 23   | 92.5  | 25   | 49   | 14   | 34.5 | 54.5 |
| 14849 | 58    | 53   | 27   | 88    | 28.5 | 66   | 15   | 34   | 45.5 |
| 14850 | 91    | 79   | 31   | 127.5 | 35   | 77.5 | 22   | 53   | 68.5 |

|       |      |      |      |       |      |       |      |      |      |
|-------|------|------|------|-------|------|-------|------|------|------|
| 14851 | 70   | 49   | 28   | 90    | 29   | 57    | 12   | 34   | 71   |
| 14852 | 56   | 61   | 24   | 93.5  | 25   | 67    | 16.5 | 35   | 53   |
| 14853 | 76.5 | 51   | 24   | 90    | 25   | 56    | 14   | 32   | 66   |
| 14854 | 38   | 45   | 24   | 83    | 19   | 59    | 10   | 31   | 53   |
| 14855 | 51   | 48.5 | 47   | 86    | 23   | 54    | 13   | 31   | 51   |
| 14856 | 43   | 39   | 23   | 78    | 20   | 48    | 11   | 30.5 | 52   |
| 14857 | 44   | 52   | 23   | 100   | 25   | 60.5  | 15   | 36   | 55   |
| 14858 | 680  | 46   | 29   | 78    | 53   | 62    | 12   | 30   | 51   |
| 14859 | 43   | 45   | 24   | 81    | 24.5 | 50    | 12   | 29   | 39   |
| 14860 | 67   | 80   | 28.5 | 95    | 29   | 81    | 19   | 40   | 65   |
| 14861 | 46   | 41   | 24.5 | 78    | 17   | 52.5  | 11   | 28   | 42.5 |
| 14862 | 42   | 49   | 23   | 125   | 20   | 49    | 12   | 33   | 45   |
| 14863 | 47   | 52   | 25   | 100.5 | 24.5 | 56    | 14   | 32   | 53   |
| 14864 | 59   | 64.5 | 30   | 105   | 27   | 61    | 20   | 40   | 72   |
| 14865 | 74   | 54   | 25   | 84    | 23   | 106.5 | 16   | 34   | 52.5 |
| 14866 | 52   | 66   | 23   | 96    | 40   | 61    | 19   | 39   | 66   |
| 14867 | 39   | 38   | 22   | 75    | 17   | 48    | 11   | 28   | 40   |
| 14868 | 76.5 | 64   | 22   | 91    | 25   | 91    | 22   | 36   | 59   |
| 14869 | 47.5 | 64.5 | 29   | 124.5 | 26   | 57    | 18   | 36   | 57   |
| 14870 | 35   | 35   | 21   | 67    | 18   | 48    | 9    | 26   | 38   |
| 14871 | 81   | 69   | 27.5 | 98    | 33   | 65.5  | 21   | 36.5 | 61   |
| 14872 | 66   | 59   | 23.5 | 84.5  | 20   | 91    | 14   | 36   | 54   |
| 14873 | 52.5 | 64   | 25   | 95.5  | 28   | 65    | 18   | 37   | 55   |
| 14874 | 43   | 54   | 24   | 84    | 23   | 56    | 13   | 31.5 | 51.5 |
| 14875 | 48   | 63   | 27   | 84.5  | 28   | 54    | 17   | 35.5 | 56   |
| 14876 | 51.5 | 51   | 24   | 86    | 20   | 66    | 12   | 35   | 56   |
| 14877 | 50   | 48   | 23   | 98.5  | 25   | 60    | 12   | 31   | 57   |
| 14878 | 50   | 50.5 | 25   | 90    | 24   | 59    | 14   | 33   | 52   |
| 14879 | 61.5 | 70   | 30   | 103   | 27   | 66.5  | 19.5 | 42   | 63   |
| 14880 | 55.5 | 62   | 27   | 104   | 25   | 59    | 20   | 39   | 56   |
| 14881 | 50   | 61   | 25   | 97    | 40   | 58    | 16   | 35   | 53   |
| 14882 | 42   | 51   | 22   | 90    | 30   | 54    | 14   | 30.5 | 51   |
| 14883 | 57   | 43   | 22   | 69.5  | 18   | 65.5  | 10   | 29   | 50   |
| 14884 | 44.5 | 38   | 19   | 81.5  | 17   | 49    | 14   | 25.5 | 37   |
| 14885 | 38   | 37   | 24   | 69.5  | 26   | 48    | 9    | 28   | 39   |
| 14886 | 46   | 45   | 25   | 90    | 18   | 48.5  | 12   | 28   | 43   |
| 14887 | 46   | 31   | 24   | 77    | 59   | 40    | 11   | 28   | 47   |
| 14888 | 301  | 57   | 26   | 130.5 | 24   | 56    | 17.5 | 34.5 | 65   |
| 14889 | 52.5 | 54   | 24   | 90    | 28   | 69.5  | 12   | 31   | 46.5 |
| 14890 | 50.5 | 53   | 26   | 91    | 28   | 55    | 15   | 35.5 | 63   |
| 14891 | 42   | 47   | 25   | 98    | 23   | 54    | 15   | 32   | 49.5 |
| 14892 | 40   | 36   | 20   | 79    | 17   | 40    | 10   | 23   | 34   |
| 14893 | 64.5 | 98   | 38   | 165   | 45   | 74    | 33   | 52   | 105  |
| 14894 | 66   | 61.5 | 44   | 113   | 29   | 64.5  | 14.5 | 46   | 57   |
| 14895 | 52   | 65   | 32   | 97.5  | 33   | 64    | 19.5 | 40.5 | 55   |
| 14896 | 62   | 75   | 37   | 114.5 | 43   | 68    | 20   | 44   | 68   |
| 14897 | 46   | 44   | 39   | 165   | 21   | 61    | 12   | 36   | 40   |

|       |       |      |      |       |      |      |      |      |       |
|-------|-------|------|------|-------|------|------|------|------|-------|
| 14898 | 36    | 39   | 21.5 | 62.5  | 60   | 52   | 7.5  | 24.5 | 33    |
| 14899 | 42    | 45.5 | 22   | 71    | 52.5 | 55   | 15   | 30   | 36    |
| 14900 | 41    | 42   | 21   | 70    | 26   | 57   | 29   | 32   | 33    |
| 14901 | 38    | 43   | 22   | 66    | 20   | 56   | 11   | 28   | 31    |
| 14902 | 41    | 43   | 22   | 83    | 18   | 53   | 10   | 29   | 34    |
| 14903 | 68    | 45.5 | 25   | 75    | 18   | 55   | 16.5 | 51.5 | 37    |
| 14904 | 41    | 42.5 | 21   | 67.5  | 18   | 53.5 | 12   | 29   | 31.5  |
| 14905 | 46    | 40   | 21   | 57    | 18   | 51.5 | 7    | 27   | 33    |
| 14906 | 40    | 40   | 21   | 74    | 19   | 48   | 8    | 28   | 36    |
| 14907 | 37.5  | 43   | 20   | 66.5  | 18   | 46   | 8    | 23   | 31    |
| 14908 | 40    | 40   | 20   | 60    | 21   | 50   | 8    | 26   | 33    |
| 14909 | 35    | 38   | 21   | 66    | 18   | 53   | 9    | 32   | 32    |
| 14910 | 35    | 38   | 20   | 59.5  | 19   | 53   | 8    | 36   | 34    |
| 14911 | 36.5  | 36   | 20.5 | 68    | 17   | 46   | 9    | 30   | 32    |
| 14912 | 39    | 39   | 20   | 60    | 17   | 55   | 9    | 29   | 30    |
| 14913 | 33    | 37   | 19   | 69    | 19   | 51   | 8    | 28   | 29.5  |
| 14914 | 38    | 37   | 19   | 79    | 18   | 50   | 13   | 28   | 28    |
| 14915 | 151.5 | 54   | 31.5 | 98    | 521  | 94   | 17   | 46   | 58.5  |
| 14916 | 147.5 | 54   | 49   | 136   | 30   | 76   | 101  | 107  | 46    |
| 14917 | 40    | 44   | 23   | 68    | 20   | 51   | 16   | 27   | 32    |
| 14918 | 51    | 50   | 36   | 104.5 | 29   | 66   | 12   | 37.5 | 139   |
| 14919 | 71.5  | 39   | 41   | 100.5 | 87.5 | 54   | 21   | 67.5 | 94.5  |
| 14920 | 41    | 40   | 26   | 61    | 112  | 59   | 10   | 35   | 36    |
| 14921 | 164   | 44   | 22.5 | 78    | 24.5 | 119  | 10   | 35   | 67    |
| 14922 | 40    | 43   | 21   | 69    | 26   | 55   | 11   | 32   | 68.5  |
| 14923 | 83    | 57   | 40   | 80.5  | 50.5 | 69   | 33   | 55   | 55    |
| 14924 | 44.5  | 70.5 | 29.5 | 101.5 | 32   | 54.5 | 113  | 38   | 33    |
| 14925 | 34.5  | 39   | 21   | 74    | 18.5 | 48.5 | 9    | 28   | 31    |
| 14926 | 45    | 38   | 21   | 52    | 18   | 52   | 11   | 24   | 30    |
| 14927 | 46    | 37.5 | 21.5 | 60    | 19   | 52.5 | 8    | 31.5 | 33.5  |
| 14928 | 49    | 39   | 20   | 66    | 38   | 53   | 11   | 31   | 35    |
| 14929 | 341   | 50   | 25   | 83    | 24   | 54   | 12   | 35   | 53    |
| 14930 | 51.5  | 75   | 28   | 116   | 39   | 68.5 | 20   | 39   | 56.5  |
| 14931 | 58    | 78   | 31   | 126   | 32.5 | 71   | 23   | 48   | 106   |
| 14932 | 68    | 93   | 36   | 162   | 82   | 74   | 28.5 | 60   | 135.5 |
| 14933 | 55.5  | 82   | 29   | 127   | 36   | 75   | 26   | 48   | 63.5  |
| 14934 | 57    | 70   | 31   | 119   | 34   | 61   | 18   | 43   | 63    |
| 14935 | 52    | 59   | 25   | 116   | 31   | 66   | 18   | 43.5 | 73.5  |
| 14936 | 53    | 54   | 25   | 100.5 | 30.5 | 56   | 13   | 33   | 61.5  |
| 14937 | 59.5  | 68   | 26   | 112.5 | 28   | 65   | 17   | 39   | 51    |
| 14938 | 56.5  | 73   | 31   | 119   | 38   | 60   | 19   | 46   | 76.5  |
| 14939 | 43    | 50.5 | 24   | 118   | 26   | 47.5 | 13   | 39   | 63    |
| 14940 | 48    | 65   | 24   | 113   | 35   | 62   | 15   | 38   | 57    |
| 14941 | 57    | 76   | 28   | 127.5 | 34   | 68   | 26   | 49   | 59    |
| 14942 | 52    | 60   | 27.5 | 126   | 29   | 59   | 34.5 | 44   | 51    |
| 14943 | 56    | 69   | 29   | 119   | 36.5 | 66   | 20   | 48.5 | 59    |
| 14944 | 51    | 55   | 22.5 | 87    | 24   | 56   | 14   | 32   | 47    |



|       |      |      |      |       |      |      |     |      |      |
|-------|------|------|------|-------|------|------|-----|------|------|
| 14945 | 51.5 | 66.5 | 27   | 113   | 30   | 60   | 20  | 39   | 56   |
| 14946 | 42.5 | 49   | 23   | 89    | 22   | 56   | 12  | 30   | 45   |
| 14947 | 45   | 69   | 24   | 108.5 | 27   | 61   | 16  | 41   | 56   |
| 14948 | 51   | 85.5 | 30   | 115   | 34   | 70   | 25  | 46   | 77   |
| 14949 | 44   | 50   | 30   | 95    | 36   | 53   | 23  | 34   | 49   |
| 14950 | 48   | 62   | 25   | 105.5 | 26   | 60   | 17  | 39   | 58.5 |
| 14951 | 46   | 53   | 27   | 100   | 25   | 50   | 14  | 35   | 44.5 |
| 14952 | 74.5 | 87.5 | 28   | 128.5 | 34   | 73   | 25  | 53   | 69   |
| 14953 | 47   | 66   | 27   | 117.5 | 38   | 67   | 18  | 46   | 51   |
| 14954 | 61   | 58   | 24   | 103   | 48   | 56   | 17  | 38.5 | 62   |
| 14955 | 57   | 63   | 26.5 | 103   | 29   | 58   | 18  | 38   | 57   |
| 14956 | 54   | 72   | 31   | 130   | 39   | 64   | 22  | 45.5 | 85   |
| 14957 | 36   | 48   | 24.5 | 90    | 25   | 53   | 11  | 35   | 38   |
| 14958 | 39   | 41   | 22.5 | 96    | 18   | 50   | 8   | 26.5 | 45   |
| 14959 | 57   | 74   | 31   | 112.5 | 28   | 67   | 19  | 46   | 61   |
| 14960 | 47.5 | 44   | 24   | 95.5  | 24   | 52   | 17  | 34   | 50   |
| 14961 | 54   | 56   | 21   | 95    | 28.5 | 70   | 15  | 35   | 67   |
| 14962 | 74   | 58   | 21   | 108   | 27   | 60.5 | 17  | 34.5 | 51   |
| 14963 | 48   | 61   | 26   | 100   | 30.5 | 60   | 16  | 39   | 59   |
| 14964 | 60   | 71   | 28   | 123   | 26   | 75   | 17  | 40   | 70   |
| 14965 | 46.5 | 52   | 23   | 94    | 20.5 | 51.5 | 13  | 32   | 39   |
| 14966 | 44   | 52.5 | 24   | 96    | 25   | 58   | 13  | 34   | 57   |
| 14967 | 58   | 74.5 | 28   | 128.5 | 31   | 61   | 18  | 43   | 62   |
| 14968 | 40   | 42   | 21   | 75    | 21   | 48   | 9   | 29   | 40   |
| 14969 | 37   | 41   | 22   | 97    | 25   | 50.5 | 10  | 40   | 41   |
| 14970 | 39   | 38   | 21   | 107.5 | 23   | 55   | 10  | 40   | 43   |
| 14971 | 42   | 41   | 23   | 95    | 26   | 49   | 8.5 | 35   | 34.5 |
| 14972 | 36.5 | 38   | 24.5 | 83.5  | 23   | 53.5 | 10  | 37   | 61.5 |
| 14973 | 40   | 40   | 23   | 92    | 36   | 47   | 9   | 37   | 40   |
| 14974 | 41   | 42   | 20   | 90    | 23   | 54.5 | 7   | 34   | 35   |
| 14975 | 38   | 40.5 | 24   | 123   | 30   | 51   | 10  | 35   | 54   |
| 14976 | 65.5 | 77   | 32   | 122   | 34   | 77   | 19  | 64   | 112  |
| 14977 | 56   | 61   | 27   | 99    | 25   | 78   | 10  | 44   | 95.5 |
| 14978 | 54   | 54   | 29   | 92.5  | 24   | 65   | 12  | 36   | 54   |
| 14979 | 91   | 61.5 | 29   | 88    | 27   | 78   | 14  | 48   | 74   |
| 14980 | 49.5 | 62   | 27   | 101   | 24   | 70   | 12  | 42   | 83   |
| 14981 | 65.5 | 54.5 | 30   | 127.5 | 77   | 65   | 11  | 47   | 63   |
| 14982 | 51   | 51   | 28   | 105.5 | 32.5 | 64   | 10  | 38   | 40   |
| 14983 | 48   | 49   | 31   | 105.5 | 45   | 57   | 11  | 49.5 | 48   |
| 14984 | 79.5 | 61   | 31   | 109   | 38   | 88   | 13  | 55   | 49   |
| 14985 | 87   | 57   | 28   | 160   | 20   | 94.5 | 10  | 37   | 54   |
| 14986 | 52   | 51   | 25   | 67    | 27.5 | 69   | 10  | 37   | 46   |
| 14987 | 45   | 45   | 26   | 65.5  | 20   | 57   | 9   | 45.5 | 40   |
| 14988 | 83   | 70   | 31   | 102   | 39   | 69.5 | 25  | 44   | 64   |
| 14989 | 49   | 57.5 | 27   | 103   | 29.5 | 61   | 14  | 35   | 54   |
| 14990 | 73.5 | 91   | 30   | 113   | 43   | 83.5 | 27  | 50   | 89   |
| 14991 | 45   | 49   | 25.5 | 91    | 29   | 56.5 | 14  | 34   | 45   |

|       |       |      |      |       |       |      |      |      |       |
|-------|-------|------|------|-------|-------|------|------|------|-------|
| 14992 | 171   | 62   | 23   | 95    | 51.5  | 77   | 18   | 41   | 54    |
| 14993 | 49    | 61   | 25   | 88.5  | 38    | 55   | 17   | 37   | 111.5 |
| 14994 | 93    | 98.5 | 33   | 128   | 34    | 216  | 21   | 93.5 | 95.5  |
| 14995 | 45    | 56   | 25   | 101   | 34    | 59   | 16   | 35   | 67    |
| 14996 | 59    | 80   | 27   | 115   | 43    | 73   | 22   | 42   | 78    |
| 14997 | 69    | 69   | 28   | 124   | 36    | 63   | 17   | 37   | 60.5  |
| 14998 | 56.5  | 51   | 23   | 103   | 52    | 42   | 16   | 30   | 44    |
| 14999 | 54    | 60   | 22   | 91    | 33    | 85   | 14   | 48   | 56    |
| 15000 | 65    | 68   | 32   | 125   | 46.5  | 64   | 21   | 49   | 119   |
| 15001 | 42    | 60   | 23   | 111   | 32.5  | 59.5 | 18   | 34   | 56    |
| 15002 | 43    | 54   | 23   | 99.5  | 36    | 53   | 13.5 | 34   | 47    |
| 15003 | 46    | 55   | 27   | 96    | 25    | 59   | 16   | 34   | 61.5  |
| 15004 | 46    | 64   | 23.5 | 110   | 32    | 59.5 | 18   | 39.5 | 67    |
| 15005 | 61    | 80.5 | 29   | 118   | 34    | 65   | 21   | 46   | 56    |
| 15006 | 58    | 58   | 24   | 87.5  | 35    | 60.5 | 18   | 42.5 | 46.5  |
| 15007 | 42    | 57   | 27   | 101   | 34    | 55   | 16   | 39   | 75    |
| 15008 | 47    | 60   | 23   | 103   | 34    | 63   | 22   | 39   | 50    |
| 15009 | 70.5  | 76   | 30.5 | 142.5 | 56    | 68   | 21   | 51.5 | 107   |
| 15010 | 44    | 41   | 23.5 | 101.5 | 26    | 50   | 10   | 33   | 39    |
| 15011 | 48    | 58.5 | 22.5 | 104   | 34.5  | 55   | 14   | 37.5 | 58    |
| 15012 | 40    | 48   | 29   | 95    | 21    | 53   | 12   | 35   | 58.5  |
| 15013 | 50    | 58   | 29   | 100.5 | 185.5 | 59   | 16   | 36.5 | 73    |
| 15014 | 55    | 65   | 26   | 109   | 37    | 66   | 22   | 42   | 73    |
| 15015 | 42    | 47   | 22   | 95    | 23.5  | 53   | 10.5 | 31.5 | 37    |
| 15016 | 54    | 65   | 25   | 113   | 28    | 57   | 16   | 39   | 53    |
| 15017 | 61    | 55   | 22   | 106   | 203   | 52.5 | 15   | 52   | 49    |
| 15018 | 47    | 53   | 24   | 116.5 | 38    | 46   | 16   | 37   | 87    |
| 15019 | 44    | 62   | 20   | 92    | 26.5  | 53   | 11   | 30   | 46    |
| 15020 | 45    | 61   | 24   | 100   | 28    | 56   | 16   | 36   | 55    |
| 15021 | 56    | 71.5 | 26   | 124   | 52    | 64   | 21.5 | 41   | 61    |
| 15022 | 51    | 74   | 28   | 135.5 | 37    | 68   | 19.5 | 41   | 73    |
| 15023 | 56    | 69.5 | 33.5 | 127   | 35    | 66   | 18   | 45   | 95.5  |
| 15024 | 51    | 65   | 30   | 96.5  | 32    | 66   | 19   | 42   | 65    |
| 15025 | 100.5 | 68.5 | 29   | 133.5 | 60    | 64   | 20   | 41   | 132   |
| 15026 | 72    | 88.5 | 31   | 142.5 | 71    | 66   | 24   | 45   | 93    |
| 15027 | 54.5  | 55   | 31   | 116   | 41    | 59.5 | 17   | 37   | 63    |
| 15028 | 81.5  | 78   | 28   | 125   | 37    | 87   | 19   | 47   | 96    |
| 15029 | 40    | 46   | 24   | 91.5  | 30    | 53   | 13   | 40   | 65    |
| 15030 | 56.5  | 61   | 25   | 103   | 31.5  | 55   | 19   | 35   | 55    |
| 15031 | 57    | 53   | 22   | 103   | 27.5  | 65.5 | 14   | 33   | 54    |
| 15032 | 52    | 37   | 25   | 97.5  | 173.5 | 51   | 26   | 29   | 29    |
| 15033 | 34.5  | 31   | 15   | 51.5  | 27    | 46.5 | 12   | 24.5 | 27    |
| 15034 | 148   | 31   | 17   | 55.5  | 20    | 43   | 5    | 24   | 25    |
| 15035 | 37    | 34   | 16   | 58    | 41    | 48.5 | 5    | 25   | 38    |
| 15036 | 31.5  | 33   | 16   | 67    | 26.5  | 45   | 6    | 22   | 27    |
| 15037 | 35.5  | 36   | 21   | 191   | 15    | 50   | 7    | 37   | 43    |
| 15038 | 32    | 35   | 17   | 58    | 13    | 46   | 6    | 23   | 25    |

|       |       |      |      |       |       |      |      |       |      |
|-------|-------|------|------|-------|-------|------|------|-------|------|
| 15039 | 29.5  | 30   | 24   | 53.5  | 15    | 42   | 5    | 21    | 26   |
| 15040 | 54.5  | 38   | 26   | 156   | 80    | 50   | 23   | 87.5  | 40.5 |
| 15041 | 31    | 33   | 14   | 66.5  | 17    | 39.5 | 6    | 21    | 23   |
| 15042 | 50    | 31   | 15.5 | 53    | 22    | 44.5 | 7    | 23    | 32   |
| 15043 | 38    | 28   | 20.5 | 74    | 54    | 36   | 12.5 | 31    | 42   |
| 15044 | 28    | 30.5 | 13   | 41    | 12    | 42   | 5    | 18    | 26   |
| 15045 | 40    | 33   | 19   | 58    | 23    | 45   | 8    | 35    | 26   |
| 15046 | 32    | 28.5 | 16   | 59    | 15    | 41   | 7    | 32    | 25   |
| 15047 | 49    | 35   | 23   | 65    | 21    | 54   | 17   | 29    | 33   |
| 15048 | 89    | 61.5 | 18   | 51    | 14    | 243  | 6    | 96.5  | 52   |
| 15049 | 27    | 24.5 | 14   | 62.5  | 17    | 37.5 | 5    | 20    | 27   |
| 15050 | 53    | 35.5 | 22.5 | 82    | 33    | 43   | 9    | 45    | 37   |
| 15051 | 32.5  | 31   | 20   | 58    | 26    | 45   | 8    | 27    | 30   |
| 15052 | 62    | 39   | 18   | 70    | 1507  | 78   | 16   | 28    | 51.5 |
| 15053 | 116   | 35.5 | 19.5 | 63    | 115   | 46.5 | 11   | 24.5  | 30   |
| 15054 | 117.5 | 32   | 24   | 61    | 26.5  | 47   | 11   | 28    | 56.5 |
| 15055 | 48.5  | 32   | 19   | 59.5  | 17.5  | 45   | 10   | 23    | 43.5 |
| 15056 | 34    | 33   | 21   | 57.5  | 65    | 44   | 7    | 80    | 27   |
| 15057 | 210   | 42   | 33   | 283   | 154   | 54   | 20   | 52    | 42.5 |
| 15058 | 27    | 28   | 14   | 49    | 15    | 37   | 8    | 21    | 22   |
| 15059 | 52.5  | 32   | 18   | 55    | 15    | 44   | 6    | 27.5  | 25   |
| 15060 | 27    | 32   | 14   | 53    | 13    | 41   | 5    | 21    | 24   |
| 15061 | 33    | 31   | 17   | 71    | 16    | 43   | 6    | 24    | 26   |
| 15062 | 36.5  | 31   | 26   | 57.5  | 17    | 39.5 | 6    | 28    | 52.5 |
| 15063 | 31    | 32   | 18   | 55    | 15    | 40   | 5    | 22    | 26   |
| 15064 | 110   | 44   | 22   | 92    | 192.5 | 135  | 8    | 31    | 44   |
| 15065 | 47.5  | 28   | 15   | 48    | 23    | 43   | 29   | 19    | 25   |
| 15066 | 49.5  | 33   | 18   | 51    | 19    | 43   | 21   | 25.5  | 72   |
| 15067 | 44.5  | 30   | 14   | 52    | 81    | 43.5 | 6    | 24    | 24   |
| 15068 | 38    | 46   | 23   | 60.5  | 16    | 52   | 7    | 111.5 | 27   |
| 15069 | 42.5  | 43   | 27   | 105   | 26    | 59   | 19   | 31    | 36   |
| 15070 | 41    | 45.5 | 23   | 71    | 27    | 57   | 8    | 32    | 36   |
| 15071 | 43    | 42   | 20   | 54    | 20    | 57   | 7    | 28    | 57   |
| 15072 | 48.5  | 46   | 23   | 144.5 | 22    | 58.5 | 14   | 36    | 36   |
| 15073 | 38    | 38   | 23   | 82    | 28.5  | 55   | 9    | 32    | 32   |
| 15074 | 43.5  | 44   | 26.5 | 104   | 45    | 59   | 9    | 44    | 52   |
| 15075 | 47    | 45   | 22   | 57    | 22    | 58   | 16   | 34    | 36   |
| 15076 | 101   | 68   | 35.5 | 83    | 772   | 74   | 18   | 51.5  | 56   |
| 15077 | 52    | 42   | 19   | 48.5  | 161   | 63   | 7    | 28    | 34   |
| 15078 | 56    | 55   | 37   | 77    | 31    | 63   | 18   | 40    | 58   |
| 15079 | 102   | 45   | 28   | 112   | 84.5  | 64   | 17   | 37    | 43   |
| 15080 | 42    | 41.5 | 17   | 56    | 37    | 53   | 8    | 28    | 40   |
| 15081 | 44.5  | 43   | 28   | 64    | 111.5 | 64   | 18   | 37    | 38   |
| 15082 | 82    | 42   | 19   | 66    | 22.5  | 56   | 9    | 28    | 37   |
| 15083 | 32    | 36   | 16.5 | 44    | 12    | 50   | 5    | 26    | 29   |
| 15084 | 42    | 42   | 21   | 87    | 16    | 60.5 | 7    | 34    | 39   |
| 15085 | 41    | 52.5 | 23   | 81    | 45.5  | 63   | 15   | 38    | 44   |

|       |      |      |      |       |       |      |      |      |      |
|-------|------|------|------|-------|-------|------|------|------|------|
| 15086 | 41   | 31.5 | 18   | 100   | 451.5 | 36.5 | 7    | 32   | 26   |
| 15087 | 44   | 43   | 26   | 99    | 28    | 53   | 7    | 34   | 32   |
| 15088 | 40.5 | 41   | 19.5 | 63    | 16    | 52   | 7    | 31.5 | 31   |
| 15089 | 45.5 | 39   | 24   | 119   | 18    | 52   | 8.5  | 34   | 33   |
| 15090 | 44   | 37   | 20   | 52    | 16    | 47.5 | 8    | 26   | 30   |
| 15091 | 85   | 82   | 35   | 143   | 39    | 120  | 19   | 79   | 95   |
| 15092 | 74.5 | 92.5 | 33.5 | 169.5 | 42    | 73   | 29   | 51   | 83   |
| 15093 | 54   | 59   | 33   | 127.5 | 41    | 63   | 19   | 46.5 | 57   |
| 15094 | 59.5 | 65   | 32.5 | 144   | 32    | 65   | 19   | 47.5 | 64   |
| 15095 | 86   | 94   | 32   | 187   | 40    | 94.5 | 27.5 | 58   | 103  |
| 15096 | 60   | 60.5 | 32   | 138   | 42    | 64   | 19   | 45   | 80   |
| 15097 | 63   | 77.5 | 32   | 143.5 | 44    | 70.5 | 26   | 52.5 | 96   |
| 15098 | 69   | 73   | 30   | 162   | 39    | 64.5 | 23   | 42.5 | 80   |
| 15099 | 79   | 65   | 31   | 233   | 34.5  | 61   | 18   | 47.5 | 89   |
| 15100 | 71   | 89   | 34   | 154   | 42    | 77.5 | 27   | 56   | 67   |
| 15101 | 69   | 74   | 28   | 134   | 35    | 87   | 17   | 42   | 59.5 |
| 15102 | 62   | 65.5 | 28   | 169   | 44    | 64   | 18   | 41.5 | 53   |
| 15103 | 53   | 62.5 | 27.5 | 152.5 | 28    | 58   | 17   | 41   | 61   |
| 15104 | 47   | 53   | 26   | 125   | 26    | 55.5 | 14   | 35   | 49   |
| 15105 | 54   | 64   | 26   | 137   | 35.5  | 63.5 | 19   | 42   | 64.5 |
| 15106 | 59   | 48   | 25.5 | 123   | 45.5  | 53   | 11   | 38   | 39   |
| 15107 | 60   | 62   | 28   | 133   | 44    | 65.5 | 17   | 42   | 75   |
| 15108 | 70.5 | 83.5 | 31.5 | 152   | 49    | 75   | 28   | 52   | 76   |
| 15109 | 71   | 83   | 34   | 153   | 48.5  | 79   | 28.5 | 50.5 | 89   |
| 15110 | 58   | 69   | 28   | 138.5 | 41    | 69   | 19   | 43.5 | 81   |
| 15111 | 60.5 | 56   | 26   | 125   | 32    | 62   | 14   | 37.5 | 66   |
| 15112 | 64   | 78   | 38   | 169   | 94    | 63   | 28   | 59   | 82.5 |
| 15113 | 61   | 78   | 33   | 161   | 41    | 70   | 25   | 46   | 69   |
| 15114 | 61.5 | 73   | 32   | 155   | 32.5  | 61   | 22   | 56   | 72   |
| 15115 | 60   | 82   | 30   | 146.5 | 44    | 72   | 22   | 45.5 | 78   |
| 15116 | 47   | 44   | 27   | 122   | 21    | 54   | 13   | 32.5 | 65   |
| 15117 | 48   | 57   | 27   | 117   | 31    | 58   | 15   | 42.5 | 66   |
| 15118 | 50   | 55   | 28   | 121   | 35    | 57   | 17   | 35   | 66   |
| 15119 | 62   | 85   | 34   | 169   | 41.5  | 72   | 24   | 52   | 71   |
| 15120 | 52   | 69   | 31   | 144.5 | 42    | 61   | 24   | 39   | 67.5 |
| 15121 | 47.5 | 54.5 | 21   | 107   | 29    | 55   | 11   | 33   | 39   |
| 15122 | 58   | 75   | 30   | 162   | 38    | 63   | 24   | 45   | 67   |
| 15123 | 50   | 52.5 | 23   | 118   | 28    | 55   | 15   | 37   | 66   |
| 15124 | 52   | 66   | 29   | 121   | 490   | 67   | 17   | 41   | 69   |
| 15125 | 61.5 | 66   | 28   | 132.5 | 52    | 62   | 19   | 41   | 65   |
| 15126 | 53   | 73   | 24   | 148.5 | 41    | 66   | 19   | 42   | 59   |
| 15127 | 48.5 | 51   | 24   | 119   | 31    | 50   | 14   | 32.5 | 76   |
| 15128 | 66   | 92   | 31   | 184   | 46.5  | 74   | 27   | 51   | 70   |
| 15129 | 48   | 58   | 34   | 116.5 | 27    | 55   | 16   | 34.5 | 56   |
| 15130 | 61.5 | 76   | 28   | 132   | 36    | 71   | 22   | 43.5 | 66   |
| 15131 | 50   | 51   | 23   | 121   | 27    | 49   | 14   | 40   | 45   |
| 15132 | 47   | 54   | 25   | 150   | 26    | 53   | 13   | 38.5 | 52   |

|       |       |      |      |       |      |      |      |      |      |
|-------|-------|------|------|-------|------|------|------|------|------|
| 15133 | 53    | 55   | 27   | 134   | 33   | 53   | 19.5 | 41   | 59   |
| 15134 | 123.5 | 62   | 27   | 130   | 29   | 53   | 17   | 39   | 60   |
| 15135 | 144.5 | 80   | 31.5 | 144.5 | 36.5 | 64   | 25   | 45   | 71   |
| 15136 | 59    | 54   | 23   | 113   | 34   | 63   | 17   | 36   | 68   |
| 15137 | 39    | 34   | 20   | 116   | 15   | 44   | 7    | 27   | 28   |
| 15138 | 47.5  | 35   | 20   | 92    | 18   | 45   | 10.5 | 24   | 35   |
| 15139 | 34    | 34   | 18   | 87    | 28   | 43   | 6    | 25   | 31   |
| 15140 | 34    | 33   | 18   | 57    | 18   | 42   | 8    | 22   | 29   |
| 15141 | 50    | 36   | 18   | 98    | 22   | 42   | 7    | 28   | 29   |
| 15142 | 42    | 44   | 26   | 80    | 26.5 | 62   | 13   | 32   | 37   |
| 15143 | 43    | 36   | 24   | 136   | 487  | 44.5 | 8    | 45   | 75   |
| 15144 | 39    | 32   | 20   | 61    | 25   | 43   | 8    | 23   | 29   |
| 15145 | 70    | 48   | 27   | 94.5  | 31   | 73   | 9.5  | 37.5 | 49   |
| 15146 | 35.5  | 31   | 16   | 62    | 19   | 40   | 8    | 23.5 | 27   |
| 15147 | 38    | 34   | 17.5 | 74    | 16.5 | 41.5 | 12   | 24   | 27   |
| 15148 | 37    | 36   | 23   | 80    | 23   | 45   | 8    | 31   | 59   |
| 15149 | 36    | 34   | 21   | 83    | 29   | 46.5 | 18   | 37   | 42   |
| 15150 | 52    | 40   | 23   | 135   | 16   | 46   | 11   | 43.5 | 42   |
| 15151 | 39.5  | 37   | 20   | 99    | 25.5 | 44   | 8    | 28   | 47.5 |
| 15152 | 63.5  | 32   | 21   | 81    | 20   | 42   | 9    | 27   | 33.5 |
| 15153 | 33    | 31   | 18   | 68    | 15   | 43   | 8    | 39   | 27.5 |
| 15154 | 57    | 65.5 | 28   | 111   | 35   | 65.5 | 14   | 39.5 | 57.5 |
| 15155 | 69    | 60   | 32   | 100   | 30   | 61   | 19   | 43   | 64   |
| 15156 | 56    | 67   | 29.5 | 96    | 41   | 61   | 22   | 43   | 68.5 |
| 15157 | 62.5  | 60   | 32   | 109   | 33   | 68.5 | 18   | 40   | 54   |
| 15158 | 77.5  | 92   | 37   | 154   | 68   | 113  | 19.5 | 64.5 | 93   |
| 15159 | 83    | 76   | 33   | 121   | 243  | 97   | 15   | 50   | 72.5 |
| 15160 | 50    | 47   | 29   | 80    | 42   | 57   | 18   | 37   | 55   |
| 15161 | 53    | 57   | 26   | 91.5  | 32   | 52.5 | 14   | 33   | 71   |
| 15162 | 48    | 59.5 | 26   | 108.5 | 29   | 60   | 15   | 40   | 90   |
| 15163 | 61    | 68   | 28.5 | 113   | 33.5 | 62   | 16   | 41   | 60   |
| 15164 | 58    | 68   | 32   | 113   | 39   | 66.5 | 31   | 45   | 84   |
| 15165 | 56    | 71   | 37.5 | 125   | 38   | 69   | 18   | 40   | 57   |
| 15166 | 52    | 77   | 27   | 89.5  | 32   | 70   | 14   | 42   | 58.5 |
| 15167 | 55.5  | 64   | 30   | 113   | 36   | 72   | 17   | 44   | 79   |
| 15168 | 58    | 80.5 | 29   | 133   | 42   | 75   | 24   | 47   | 66   |
| 15169 | 56.5  | 55   | 27   | 104.5 | 40   | 59   | 16   | 38   | 60   |
| 15170 | 53    | 64   | 27   | 137   | 33   | 64   | 16   | 36   | 65   |
| 15171 | 64    | 69   | 35   | 117   | 37   | 64   | 19   | 38   | 60   |
| 15172 | 64    | 84   | 33   | 117   | 47   | 74.5 | 29   | 47   | 70.5 |
| 15173 | 57    | 67   | 27.5 | 107   | 40   | 60   | 15   | 33.5 | 68   |
| 15174 | 52    | 60.5 | 31   | 116   | 35   | 62   | 16   | 39   | 59   |
| 15175 | 70.5  | 89   | 50   | 134   | 49.5 | 80   | 23   | 54.5 | 106  |
| 15176 | 50    | 70   | 29   | 124   | 35   | 63   | 17.5 | 42.5 | 71   |
| 15177 | 57    | 65   | 27   | 101   | 47   | 64   | 15   | 39   | 64   |
| 15178 | 51.5  | 57   | 24   | 122   | 35   | 63   | 15   | 40.5 | 49   |
| 15179 | 71.5  | 68   | 31.5 | 121   | 35   | 71.5 | 19   | 44   | 75   |

|       |      |      |      |       |      |      |      |      |      |
|-------|------|------|------|-------|------|------|------|------|------|
| 15180 | 65   | 84   | 28   | 128   | 45   | 70   | 23   | 47   | 67   |
| 15181 | 64   | 88   | 27   | 129   | 43   | 70.5 | 23   | 42   | 97.5 |
| 15182 | 57   | 74   | 29   | 120   | 34   | 70   | 20   | 43   | 75   |
| 15183 | 65   | 83   | 32   | 149   | 45   | 73   | 22   | 57   | 102  |
| 15184 | 61   | 82   | 30   | 157   | 40   | 69.5 | 22   | 58.5 | 80.5 |
| 15185 | 52   | 60   | 27   | 101   | 29   | 63   | 14   | 36   | 51   |
| 15186 | 65.5 | 71.5 | 32   | 138   | 50   | 67   | 21   | 45.5 | 63   |
| 15187 | 65   | 82   | 31   | 131.5 | 43   | 72   | 25   | 48   | 74   |
| 15188 | 90   | 88   | 31   | 122   | 71   | 87   | 23   | 43   | 74   |
| 15189 | 59   | 79   | 38   | 138   | 38.5 | 72   | 25   | 43   | 70   |
| 15190 | 63   | 70.5 | 36   | 114   | 63   | 66.5 | 19   | 43   | 66   |
| 15191 | 82   | 96.5 | 35   | 151.5 | 49   | 82   | 28   | 55.5 | 99   |
| 15192 | 55   | 66   | 26   | 117   | 34   | 63   | 15   | 39   | 63   |
| 15193 | 52.5 | 59   | 29   | 108   | 41   | 64   | 16   | 38   | 60   |
| 15194 | 55.5 | 76   | 32   | 102   | 33   | 58   | 22   | 42   | 64   |
| 15195 | 56   | 76   | 31.5 | 120   | 46   | 71   | 24   | 44.5 | 74   |
| 15196 | 52   | 62   | 27   | 108.5 | 32   | 60   | 16   | 36   | 66   |
| 15197 | 52   | 69.5 | 28   | 113.5 | 33   | 58   | 22   | 39   | 70   |
| 15198 | 79   | 92   | 33   | 140   | 51   | 79   | 30.5 | 56   | 93.5 |
| 15199 | 48   | 64   | 27   | 113   | 35   | 64   | 15   | 38   | 61   |
| 15200 | 54   | 64   | 28   | 118   | 32   | 69   | 15   | 37   | 68   |
| 15201 | 52   | 48   | 25   | 106   | 27   | 59   | 10   | 31.5 | 55   |
| 15202 | 53   | 71   | 28.5 | 110   | 28   | 62   | 18   | 40   | 60.5 |
| 15203 | 59   | 69   | 29   | 166   | 35   | 71   | 18   | 40   | 59   |
| 15204 | 56   | 57   | 27   | 105   | 34   | 59   | 15   | 34.5 | 54   |
| 15205 | 75   | 48   | 24   | 97.5  | 33   | 50   | 13   | 33   | 63   |
| 15206 | 62.5 | 84   | 30   | 149   | 40   | 67   | 21   | 49   | 88   |
| 15207 | 86   | 117  | 35   | 180   | 44.5 | 81   | 31   | 57   | 85   |
| 15208 | 57   | 58   | 26   | 99    | 30   | 62   | 14   | 37   | 80   |
| 15209 | 53.5 | 64   | 24   | 98    | 26   | 66   | 14   | 35   | 59   |
| 15210 | 56.5 | 70   | 28   | 101   | 32   | 63.5 | 19   | 40   | 55   |
| 15211 | 67   | 77   | 31   | 126   | 45.5 | 77   | 20   | 46   | 73.5 |
| 15212 | 68   | 59   | 27   | 110   | 29   | 62   | 16.5 | 39   | 60   |
| 15213 | 66   | 87   | 29   | 148   | 38   | 71   | 23.5 | 47   | 74   |
| 15214 | 71   | 69   | 30   | 132   | 36   | 77   | 19.5 | 51   | 74.5 |
| 15215 | 62   | 54   | 26   | 134   | 35   | 68   | 13   | 37   | 60   |
| 15216 | 51   | 59   | 25   | 109   | 29   | 69   | 15   | 35   | 57   |
| 15217 | 54   | 61   | 25   | 110   | 31   | 60.5 | 21   | 37.5 | 55.5 |
| 15218 | 80   | 104  | 33   | 154   | 49   | 81.5 | 35   | 65   | 102  |
| 15219 | 56.5 | 74   | 30.5 | 113   | 37   | 67   | 21   | 42   | 61   |
| 15220 | 50.5 | 62   | 24.5 | 113.5 | 27   | 64   | 16   | 36   | 68.5 |
| 15221 | 58.5 | 70   | 27   | 108   | 34   | 66   | 16   | 42   | 76   |
| 15222 | 64.5 | 72   | 28   | 128   | 40.5 | 64   | 19   | 43   | 61   |
| 15223 | 59.5 | 60   | 24   | 112   | 25   | 67   | 14   | 40   | 72   |
| 15224 | 54.5 | 80   | 28   | 137   | 33   | 71   | 24   | 48   | 77   |
| 15225 | 56   | 70   | 28.5 | 111.5 | 51.5 | 72   | 18   | 42   | 70   |
| 15226 | 68   | 70   | 27   | 116   | 30   | 82   | 18   | 47   | 88.5 |

|       |      |      |      |       |      |      |      |      |       |
|-------|------|------|------|-------|------|------|------|------|-------|
| 15227 | 31   | 34.5 | 18   | 55    | 18.5 | 47   | 8    | 21   | 32    |
| 15228 | 38   | 40   | 19   | 72.5  | 23   | 54   | 8    | 26   | 47.5  |
| 15229 | 34   | 40.5 | 18   | 62    | 19   | 53   | 7    | 23   | 36    |
| 15230 | 38   | 40   | 20   | 62    | 18   | 56.5 | 8    | 30   | 38    |
| 15231 | 32   | 19   | 20   | 54    | 16   | 29   | 7    | 28   | 23    |
| 15232 | 31   | 34   | 16   | 55    | 16   | 43   | 6    | 21   | 31    |
| 15233 | 53   | 33   | 15   | 53    | 23   | 45   | 16   | 24   | 25    |
| 15234 | 39   | 41   | 20   | 83    | 26   | 49   | 11   | 36   | 45    |
| 15235 | 37   | 36.5 | 20   | 67.5  | 58   | 46.5 | 8    | 26   | 28    |
| 15236 | 68.5 | 34   | 18   | 73    | 27   | 43.5 | 8    | 24   | 56    |
| 15237 | 31   | 31   | 15   | 50.5  | 17   | 39.5 | 6    | 22.5 | 25    |
| 15238 | 45   | 39   | 19   | 55.5  | 66   | 48   | 11   | 28.5 | 31.5  |
| 15239 | 54   | 34   | 20.5 | 47    | 27   | 46   | 10   | 31   | 32.5  |
| 15240 | 51   | 32   | 21   | 58    | 31.5 | 41.5 | 10   | 22   | 28.5  |
| 15241 | 46   | 37   | 24   | 63    | 28.5 | 51   | 16   | 28   | 35    |
| 15242 | 36   | 37   | 28.5 | 129   | 17   | 52.5 | 15   | 29   | 36    |
| 15243 | 45   | 43   | 21   | 103.5 | 30.5 | 50   | 8    | 31   | 66    |
| 15244 | 40   | 35   | 21   | 102   | 27   | 50   | 11   | 39   | 43    |
| 15245 | 33.5 | 36   | 27   | 74    | 25   | 43   | 8    | 27   | 27    |
| 15246 | 38   | 44   | 18   | 95.5  | 18   | 50   | 8.5  | 25   | 34    |
| 15247 | 33   | 34   | 18.5 | 59    | 18   | 42.5 | 8.5  | 24   | 26    |
| 15248 | 52   | 37   | 24   | 108.5 | 29   | 49   | 11   | 32   | 43    |
| 15249 | 69   | 36   | 22   | 92    | 34   | 47   | 10   | 30   | 43    |
| 15250 | 49   | 37   | 21   | 99.5  | 547  | 55   | 56   | 29   | 127.5 |
| 15251 | 43   | 41   | 20   | 65    | 19   | 55   | 9    | 29   | 55.5  |
| 15252 | 38   | 39   | 22   | 89    | 39   | 48   | 9    | 32   | 81    |
| 15253 | 51.5 | 42   | 22   | 102   | 25   | 58.5 | 9    | 32   | 39.5  |
| 15254 | 42   | 33   | 17   | 74.5  | 15   | 54   | 7    | 24   | 36    |
| 15255 | 39   | 32   | 18   | 71    | 17   | 41   | 7    | 23   | 31    |
| 15256 | 36.5 | 31   | 20   | 66    | 68   | 48   | 9    | 29   | 36    |
| 15257 | 40   | 33   | 17   | 59    | 15.5 | 42   | 5    | 24   | 27.5  |
| 15258 | 34   | 33   | 16   | 61    | 17   | 43   | 6    | 23   | 30    |
| 15259 | 33   | 36   | 21   | 64    | 20   | 44   | 9    | 26   | 36.5  |
| 15260 | 57   | 39   | 22   | 93.5  | 24   | 49   | 13   | 30   | 35    |
| 15261 | 37   | 36   | 21   | 69    | 24   | 50   | 7    | 26   | 30    |
| 15262 | 55   | 36   | 20   | 52    | 26.5 | 67   | 8    | 31   | 32    |
| 15263 | 35   | 29.5 | 16.5 | 50.5  | 29   | 39.5 | 7    | 21   | 27    |
| 15264 | 36   | 33   | 17   | 66    | 15   | 45   | 10   | 26   | 95    |
| 15265 | 39   | 35   | 16   | 53    | 18   | 50   | 6    | 23   | 30    |
| 15266 | 48   | 36   | 20   | 61    | 26.5 | 57   | 7    | 29   | 32    |
| 15267 | 34   | 33   | 17   | 51    | 28   | 43   | 8    | 20   | 27    |
| 15268 | 39.5 | 35   | 18   | 70.5  | 17   | 42   | 11   | 26   | 70    |
| 15269 | 85.5 | 35   | 19   | 60    | 25   | 48.5 | 15.5 | 26   | 45.5  |
| 15270 | 35.5 | 30   | 19   | 59.5  | 18   | 47   | 6    | 28.5 | 29    |
| 15271 | 49   | 34   | 45   | 64    | 33   | 54   | 10   | 28   | 34    |
| 15272 | 57.5 | 35   | 19   | 58    | 23   | 53   | 8    | 36   | 46    |
| 15273 | 54   | 33   | 20.5 | 49    | 18.5 | 47   | 21   | 26   | 28    |

|       |       |      |      |       |      |      |      |      |       |
|-------|-------|------|------|-------|------|------|------|------|-------|
| 15274 | 62.5  | 34   | 21   | 66    | 24   | 48   | 8    | 25.5 | 31    |
| 15275 | 43    | 34   | 20   | 58    | 25   | 47   | 8    | 28   | 29.5  |
| 15276 | 67    | 36   | 22   | 83    | 297  | 47   | 13   | 28   | 30    |
| 15277 | 29    | 30   | 16   | 72    | 20   | 40   | 6    | 22   | 28    |
| 15278 | 28    | 28   | 15   | 46    | 29   | 40   | 5    | 20   | 28    |
| 15279 | 33    | 30   | 17   | 66    | 16   | 43   | 7    | 22   | 25.5  |
| 15280 | 47    | 31   | 16   | 64    | 23.5 | 42   | 6    | 27   | 26    |
| 15281 | 30    | 32   | 17   | 55    | 17.5 | 40   | 6    | 22.5 | 25.5  |
| 15282 | 49    | 31   | 18   | 52    | 42   | 42   | 20   | 25   | 33    |
| 15283 | 37    | 32   | 16   | 65.5  | 18   | 40   | 10   | 23   | 29.5  |
| 15284 | 41.5  | 31   | 23   | 121   | 22   | 41   | 11   | 31   | 37    |
| 15285 | 34.5  | 32   | 19   | 80.5  | 18   | 43   | 27   | 26   | 30    |
| 15286 | 48    | 34   | 23.5 | 163   | 19   | 45.5 | 13   | 106  | 27    |
| 15287 | 38    | 33   | 18   | 87    | 23   | 44   | 7    | 26   | 46    |
| 15288 | 45    | 30   | 22   | 84    | 21   | 43   | 22   | 29   | 50    |
| 15289 | 105   | 41   | 36   | 202.5 | 26   | 53   | 16   | 104  | 81    |
| 15290 | 57    | 38   | 25.5 | 99    | 21   | 49.5 | 10   | 40   | 46.5  |
| 15291 | 50    | 34.5 | 25   | 99.5  | 29.5 | 47   | 12   | 33   | 38.5  |
| 15292 | 39    | 33   | 24   | 124   | 19   | 47   | 10.5 | 37   | 50    |
| 15293 | 56    | 52.5 | 28   | 116   | 52   | 84   | 28   | 36   | 71.5  |
| 15294 | 89    | 60   | 23   | 151   | 117  | 107  | 11.5 | 37   | 132.5 |
| 15295 | 41    | 34   | 19   | 99    | 45   | 47   | 9    | 29   | 66    |
| 15296 | 40.5  | 35   | 23   | 103   | 38   | 49   | 17   | 28   | 92    |
| 15297 | 93    | 64   | 36   | 202   | 43   | 83   | 28   | 101  | 135   |
| 15298 | 62    | 58   | 28.5 | 130   | 40   | 54   | 17   | 40   | 67.5  |
| 15299 | 61    | 87   | 28   | 127   | 41   | 68   | 25.5 | 47.5 | 69.5  |
| 15300 | 57    | 69   | 27   | 107   | 41   | 59   | 20.5 | 41.5 | 56    |
| 15301 | 62    | 76   | 27   | 132.5 | 43   | 67   | 20   | 44   | 73    |
| 15302 | 63.5  | 77   | 34   | 126   | 34.5 | 80   | 24   | 52   | 97    |
| 15303 | 56    | 64   | 28   | 119.5 | 38   | 59   | 17   | 43   | 64    |
| 15304 | 51.5  | 54   | 21   | 97    | 90   | 50.5 | 13   | 33   | 40    |
| 15305 | 41    | 46   | 26   | 83    | 30   | 50   | 11   | 30   | 54    |
| 15306 | 54    | 65   | 28   | 120   | 37   | 60   | 20   | 42   | 49    |
| 15307 | 65    | 77.5 | 36   | 142   | 38   | 70.5 | 28   | 50   | 72    |
| 15308 | 54    | 66   | 27   | 109   | 30   | 59.5 | 14   | 37   | 58    |
| 15309 | 45    | 55   | 24.5 | 117   | 32   | 56   | 15   | 37   | 48    |
| 15310 | 60    | 72   | 28   | 122.5 | 32   | 67.5 | 18   | 41   | 71    |
| 15311 | 50    | 68   | 26   | 127.5 | 35.5 | 60   | 17   | 40   | 71.5  |
| 15312 | 76    | 94   | 38   | 152   | 50   | 71.5 | 29   | 82   | 77.5  |
| 15313 | 48    | 47   | 24   | 90.5  | 43   | 51.5 | 12   | 34   | 48    |
| 15314 | 62    | 65   | 31   | 113   | 33   | 66   | 17   | 42   | 63    |
| 15315 | 57    | 51.5 | 25   | 97    | 24   | 112  | 9    | 50   | 49    |
| 15316 | 51    | 55   | 28.5 | 103.5 | 33   | 51   | 17   | 33   | 46    |
| 15317 | 100.5 | 57   | 24   | 106.5 | 95.5 | 56   | 16   | 39   | 52    |
| 15318 | 51    | 68   | 30   | 121   | 30   | 58   | 19   | 42   | 58    |
| 15319 | 49    | 57   | 22   | 95    | 31   | 57   | 14   | 33   | 57.5  |
| 15320 | 62.5  | 93   | 33   | 131   | 45   | 70   | 30   | 54   | 79    |



|       |      |       |      |       |      |      |      |      |      |
|-------|------|-------|------|-------|------|------|------|------|------|
| 15321 | 53   | 79    | 29   | 119   | 39.5 | 66   | 26   | 43.5 | 68   |
| 15322 | 60   | 73.5  | 28   | 117   | 39   | 66   | 20   | 42   | 63.5 |
| 15323 | 48   | 58    | 23.5 | 105.5 | 33   | 55.5 | 15   | 37   | 50   |
| 15324 | 72.5 | 100   | 33   | 136   | 46   | 134  | 24   | 76   | 76   |
| 15325 | 50   | 50    | 27   | 100   | 29   | 49   | 14   | 34   | 57   |
| 15326 | 59   | 75    | 31   | 137.5 | 35   | 69.5 | 23   | 46   | 70.5 |
| 15327 | 67   | 90    | 30   | 121   | 38   | 67.5 | 25   | 49   | 103  |
| 15328 | 56   | 95    | 34   | 139   | 49   | 69   | 28   | 56.5 | 85.5 |
| 15329 | 246  | 54.5  | 32   | 101   | 33.5 | 62   | 21   | 46   | 57.5 |
| 15330 | 59   | 77    | 31   | 132   | 36   | 58   | 26   | 43   | 65   |
| 15331 | 69.5 | 59    | 26   | 107   | 36.5 | 52   | 16   | 40   | 48   |
| 15332 | 72   | 70    | 28   | 110   | 41   | 84.5 | 16   | 40   | 60   |
| 15333 | 65   | 90    | 35.5 | 129.5 | 40.5 | 69   | 29   | 55   | 108  |
| 15334 | 62   | 58    | 28   | 120   | 36   | 54   | 21   | 36   | 51   |
| 15335 | 87.5 | 106.5 | 36   | 159   | 47   | 88   | 33   | 92.5 | 97   |
| 15336 | 68   | 100.5 | 36   | 139.5 | 46   | 77   | 32   | 62   | 86   |
| 15337 | 51   | 66    | 41   | 105   | 30   | 57   | 15   | 42   | 55   |
| 15338 | 54   | 71    | 42.5 | 125   | 28   | 63   | 19   | 42   | 58.5 |
| 15339 | 54.5 | 67    | 27.5 | 106   | 30   | 55   | 21   | 41   | 55   |
| 15340 | 48   | 64    | 27   | 121   | 48   | 63   | 17   | 40.5 | 47   |
| 15341 | 63   | 92    | 34   | 170   | 102  | 66   | 30.5 | 50   | 74   |
| 15342 | 47   | 59    | 26.5 | 96    | 31   | 52   | 15   | 33   | 44   |
| 15343 | 54   | 70    | 23   | 135.5 | 34.5 | 60   | 17   | 38   | 69   |
| 15344 | 68   | 89    | 31   | 140   | 44   | 73.5 | 27   | 55.5 | 102  |
| 15345 | 79   | 96    | 40.5 | 159   | 56   | 73   | 34   | 59   | 78.5 |
| 15346 | 111  | 85    | 26   | 151   | 34   | 65.5 | 23   | 41   | 83   |
| 15347 | 53   | 83    | 26   | 135   | 36   | 64   | 23   | 46   | 71   |
| 15348 | 50   | 55.5  | 25   | 124.5 | 26   | 51   | 14   | 39   | 54.5 |
| 15349 | 55   | 71    | 27.5 | 122   | 32   | 64   | 19   | 44   | 62   |
| 15350 | 52.5 | 70.5  | 27   | 124   | 43.5 | 59   | 20   | 39   | 69   |
| 15351 | 62   | 88    | 35   | 149   | 43   | 75   | 22   | 42   | 81   |
| 15352 | 60   | 77    | 30   | 132   | 33   | 66   | 20   | 46   | 92   |
| 15353 | 50   | 59    | 27   | 101   | 28   | 60   | 17   | 37.5 | 58.5 |
| 15354 | 48   | 55.5  | 27   | 128.5 | 31   | 56.5 | 14   | 39   | 68   |
| 15355 | 70   | 105   | 35   | 151   | 171  | 79   | 34.5 | 56   | 80.5 |
| 15356 | 74.5 | 80    | 43   | 131   | 55   | 74.5 | 32   | 64   | 85.5 |
| 15357 | 75.5 | 85    | 31   | 178   | 37   | 66   | 28   | 51.5 | 80   |
| 15358 | 75   | 86.5  | 30   | 152   | 59   | 85   | 22   | 51   | 75   |
| 15359 | 107  | 72    | 28.5 | 136   | 32   | 68   | 25   | 44   | 77   |
| 15360 | 42   | 34    | 23   | 96    | 19   | 40   | 8    | 28   | 33   |
| 15361 | 43.5 | 59.5  | 25   | 109   | 29   | 51   | 13.5 | 34   | 48   |
| 15362 | 46   | 58    | 21.5 | 105   | 27   | 52.5 | 16   | 33.5 | 53   |
| 15363 | 46.5 | 61    | 25   | 143   | 26   | 56.5 | 19   | 41   | 73   |
| 15364 | 69   | 97    | 31   | 143.5 | 42   | 72.5 | 28   | 52   | 91   |
| 15365 | 74   | 85    | 34   | 134   | 48   | 77   | 28   | 62   | 69   |
| 15366 | 57   | 69    | 27   | 117   | 32   | 69.5 | 17   | 71.5 | 56   |
| 15367 | 43   | 48    | 24   | 102   | 25   | 51.5 | 12   | 31   | 63   |

|       |      |      |      |       |      |      |      |      |      |
|-------|------|------|------|-------|------|------|------|------|------|
| 15368 | 49.5 | 77   | 26   | 112   | 35   | 64   | 22   | 53.5 | 63   |
| 15369 | 43.5 | 51   | 23   | 110   | 24   | 47   | 15   | 30   | 60   |
| 15370 | 42.5 | 61   | 20   | 97    | 24   | 50.5 | 13   | 30   | 55   |
| 15371 | 60   | 93.5 | 33   | 134   | 39   | 67   | 29   | 49.5 | 76   |
| 15372 | 42   | 61   | 25   | 105   | 28.5 | 53   | 16   | 32   | 57.5 |
| 15373 | 52   | 66   | 26   | 113   | 43   | 56   | 16   | 43   | 46   |
| 15374 | 65.5 | 65   | 24   | 133   | 42   | 57   | 15   | 37   | 56   |
| 15375 | 48   | 68   | 24   | 109   | 29   | 54   | 17   | 36   | 62   |
| 15376 | 56   | 54   | 25   | 117   | 30.5 | 50   | 16   | 41   | 54   |
| 15377 | 50   | 63   | 26   | 120   | 37   | 56   | 18.5 | 53   | 49   |
| 15378 | 93   | 62   | 25   | 117   | 27   | 48   | 20.5 | 37   | 54.5 |
| 15379 | 51   | 64   | 24   | 120.5 | 28.5 | 49.5 | 19   | 37   | 56   |
| 15380 | 44   | 46.5 | 22   | 87    | 26   | 53   | 11   | 32   | 46   |
| 15381 | 66   | 74   | 28   | 106   | 33   | 81   | 17   | 43   | 60   |
| 15382 | 78   | 70   | 25   | 102   | 24   | 94.5 | 12   | 45   | 65   |
| 15383 | 43.5 | 56.5 | 23   | 106.5 | 25   | 50   | 14   | 36   | 48   |
| 15384 | 57   | 88   | 33.5 | 126.5 | 82   | 76   | 47.5 | 46.5 | 70   |
| 15385 | 50   | 44   | 26   | 99    | 24   | 49   | 10.5 | 31   | 47   |
| 15386 | 46   | 46   | 27.5 | 86.5  | 26   | 59.5 | 8    | 38   | 38   |
| 15387 | 58   | 68   | 28   | 105.5 | 45   | 69   | 17   | 38.5 | 66   |
| 15388 | 64   | 88   | 36   | 149   | 49   | 79   | 28   | 48   | 85   |
| 15389 | 88   | 105  | 36   | 154   | 40   | 86   | 30   | 57   | 82   |
| 15390 | 83   | 82.5 | 29   | 126.5 | 43   | 77   | 20   | 53   | 61   |
| 15391 | 47   | 48   | 31   | 78.5  | 20   | 59   | 9    | 43.5 | 43   |
| 15392 | 45.5 | 42   | 28   | 100.5 | 24   | 49   | 9    | 34.5 | 39   |
| 15393 | 45   | 62   | 29   | 86    | 21   | 55   | 17   | 29   | 36   |
| 15394 | 47.5 | 45   | 29   | 95    | 22   | 57   | 25   | 30   | 43   |
| 15395 | 54   | 52   | 36.5 | 109   | 26   | 60   | 15   | 37   | 42.5 |
| 15396 | 46   | 47   | 23   | 74    | 22   | 54   | 27.5 | 32   | 41   |
| 15397 | 53.5 | 68.5 | 24   | 78    | 23   | 69   | 13   | 34   | 44   |
| 15398 | 181  | 47   | 23   | 76    | 27   | 59   | 11   | 36   | 37   |
| 15399 | 45   | 42   | 22   | 63    | 19   | 50   | 12   | 26   | 31   |
| 15400 | 49.5 | 42   | 25   | 89    | 32   | 49.5 | 12   | 29   | 34   |
| 15401 | 49.5 | 50   | 29   | 101   | 23   | 45   | 26.5 | 27   | 31   |
| 15402 | 25   | 7    | 6    | 18    | 7    | 8    | 5    | 10   | 51   |
| 15403 | 54   | 51.5 | 28   | 150   | 23   | 77   | 26   | 56   | 47   |

Table S4

Bayes

Net

| EDI        | VAC       | GD7        | MHV       | NEG        | MYC       | MVM       | REO        | PVM        | SEN       | classified |
|------------|-----------|------------|-----------|------------|-----------|-----------|------------|------------|-----------|------------|
| <b>100</b> | 0         | 0          | 0         | 1          | 0         | 0         | 0          | 0          | 0         | EDI        |
| 1          | <b>68</b> | 0          | 0         | 2          | 0         | 0         | 0          | 0          | 0         | VAC        |
| 0          | 0         | <b>113</b> | 0         | 1          | 24        | 5         | 0          | 0          | 0         | GD7        |
| 0          | 0         | 0          | <b>72</b> | 5          | 0         | 0         | 0          | 0          | 0         | MHV        |
| 0          | 0         | 2          | 4         | <b>296</b> | 1         | 0         | 2          | 0          | 0         | NEG        |
| 0          | 0         | 0          | 2         | 6          | <b>84</b> | 0         | 0          | 0          | 0         | MYC        |
| 0          | 0         | 6          | 0         | 0          | 1         | <b>69</b> | 0          | 0          | 0         | MVM        |
| 0          | 0         | 0          | 0         | 6          | 0         | 0         | <b>107</b> | 0          | 0         | REO        |
| 0          | 0         | 0          | 0         | 0          | 0         | 0         | 0          | <b>102</b> | 0         | PVM        |
| 0          | 0         | 0          | 0         | 3          | 2         | 0         | 0          | 0          | <b>76</b> | SEN        |

Random

Forest

| EDI        | VAC       | GD7        | MHV       | NEG        | MYC       | MVM       | REO        | PVM        | SEN       | classified |
|------------|-----------|------------|-----------|------------|-----------|-----------|------------|------------|-----------|------------|
| <b>101</b> | 0         | 0          | 0         | 0          | 0         | 0         | 0          | 0          | 0         | EDI        |
| 1          | <b>53</b> | 0          | 0         | 16         | 0         | 1         | 0          | 0          | 0         | VAC        |
| 0          | 0         | <b>140</b> | 0         | 0          | 3         | 0         | 0          | 0          | 0         | GD7        |
| 0          | 0         | 0          | <b>76</b> | 1          | 0         | 0         | 0          | 0          | 0         | MHV        |
| 0          | 0         | 1          | 0         | <b>304</b> | 0         | 0         | 0          | 0          | 0         | NEG        |
| 0          | 0         | 1          | 0         | 2          | <b>89</b> | 0         | 0          | 0          | 0         | MYC        |
| 0          | 0         | 2          | 0         | 1          | 0         | <b>72</b> | 0          | 0          | 1         | MVM        |
| 0          | 0         | 0          | 0         | 0          | 0         | 0         | <b>113</b> | 0          | 0         | REO        |
| 0          | 0         | 0          | 0         | 0          | 0         | 0         | 0          | <b>102</b> | 0         | PVM        |
| 0          | 0         | 0          | 0         | 15         | 0         | 2         | 0          | 0          | <b>64</b> | SEN        |

The abbreviations of the viruses are as follows: Epizootic diarrhea virus of infant mice (EDIM), Theiler's mouse encephalomyelitis virus/GDVII strain (GD7), Mouse hepatitis virus (MHV), mouse minute virus (MMV), Mycoplasma pulmonis (MYC), Pneumovirus of mouse (PVM), Respiratory enteric orphan virus (Reo-3 virus) (REO), Sendai virus (SEN), Ectromelia virus (ECTRO) with NEG stands for mice that are negative for any infection from these viruses.

| SI Table 5a: Performance of the testing set with various classification algorithms - TE |                                                                                                     |      |      |      |      |      |      |      |       |      |         |
|-----------------------------------------------------------------------------------------|-----------------------------------------------------------------------------------------------------|------|------|------|------|------|------|------|-------|------|---------|
| Algorithm                                                                               | Table 3a: Performance of the testing set with various classification algorithms Test Efficiency (%) |      |      |      |      |      |      |      |       |      | AVERAGE |
|                                                                                         | NEG                                                                                                 | EDI  | GD7  | MHV  | MMV  | MYC  | PVM  | REO  | ECTRO | SEN  |         |
| 1 Meta Class Classifier                                                                 | 90.8                                                                                                | 97.3 | 98.8 | 99.8 | 95.1 | 99.7 | 95.8 | 99.9 | 99.5  | 99.0 | 97.6    |
| 2 J48                                                                                   | 88.4                                                                                                | 97.9 | 98.4 | 99.8 | 89.4 | 99.1 | 91.1 | 99.7 | 99.4  | 99.9 | 96.3    |
| 3 Simple Logistic                                                                       | 85.7                                                                                                | 97.0 | 94.6 | 99.2 | 92.6 | 99.6 | 90.5 | 99.7 | 99.5  | 99.8 | 95.8    |
| 4 SMO                                                                                   | 86.9                                                                                                | 88.0 | 98.4 | 99.8 | 94.4 | 99.1 | 91.2 | 99.6 | 99.4  | 99.8 | 95.7    |
| 5 Multilayer Perception                                                                 | 83.1                                                                                                | 98.3 | 98.7 | 99.8 | 80.5 | 99.3 | 90.5 | 99.7 | 99.4  | 99.8 | 94.9    |
| 6 Lazy ibk                                                                              | 81.3                                                                                                | 97.1 | 98.2 | 99.9 | 84.4 | 99.4 | 90.7 | 99.8 | 99.4  | 92.0 | 94.2    |
| 7 LMT                                                                                   | 78.5                                                                                                | 95.3 | 87.5 | 93.0 | 87.2 | 99.5 | 90.6 | 99.7 | 99.5  | 99.1 | 93.0    |
| 8 Rules Decision table                                                                  | 78.2                                                                                                | 91.3 | 98.7 | 99.4 | 95.6 | 98.9 | 90.4 | 99.6 | 99.4  | 99.8 | 95.1    |
| 9 Meta Bagging                                                                          | 76.2                                                                                                | 98.2 | 90.7 | 99.5 | 74.4 | 99.3 | 89.3 | 99.8 | 99.3  | 99.9 | 92.6    |
| 10 Meta Logi Boost                                                                      | 75.5                                                                                                | 98.3 | 92.1 | 99.5 | 73.5 | 99.9 | 89.3 | 99.8 | 99.1  | 99.9 | 92.7    |
| 11 Kstar                                                                                | 75.0                                                                                                | 98.1 | 92.1 | 99.4 | 73.4 | 99.6 | 90.1 | 99.8 | 99.3  | 99.9 | 92.7    |
| 12 Rules PART                                                                           | 75.0                                                                                                | 98.4 | 92.1 | 99.4 | 73.6 | 99.7 | 90.1 | 99.1 | 99.3  | 99.9 | 92.7    |
| 13 REP Tree                                                                             | 74.9                                                                                                | 97.6 | 91.0 | 99.5 | 72.9 | 99.5 | 89.1 | 99.8 | 99.3  | 99.9 | 92.3    |
| 14 Meta Random Committee                                                                | 74.8                                                                                                | 97.1 | 90.5 | 99.4 | 73.6 | 99.5 | 89.1 | 99.8 | 99.3  | 99.7 | 92.3    |
| 15 Random Forest                                                                        | 74.4                                                                                                | 97.4 | 92.6 | 99.4 | 71.8 | 98.8 | 89.1 | 99.8 | 99.3  | 99.8 | 92.2    |
| 16 Random forest subspace                                                               | 72.3                                                                                                | 97.6 | 90.1 | 96.9 | 73.5 | 99.7 | 88.3 | 98.5 | 99.2  | 99.7 | 91.6    |
| 17 Classification via Regression                                                        | 71.7                                                                                                | 94.9 | 84.6 | 99.2 | 76.2 | 98.6 | 88.7 | 99.4 | 99.5  | 99.9 | 91.3    |
| 18 Logistic                                                                             | 68.6                                                                                                | 97.2 | 79.3 | 99.9 | 76.4 | 99.3 | 88.1 | 99.7 | 98.4  | 92.2 | 89.9    |
| 19 Rules One R                                                                          | 62.8                                                                                                | 96.7 | 79.0 | 94.3 | 77.7 | 98.1 | 85.0 | 90.5 | 99.1  | 95.7 | 87.9    |
| 20 Rules Zero R                                                                         | 62.8                                                                                                | 96.7 | 79.0 | 94.3 | 77.7 | 98.1 | 85.0 | 90.5 | 99.1  | 95.7 | 87.9    |
| 21 Bayesnet                                                                             | 57.5                                                                                                | 93.5 | 82.7 | 95.2 | 60.0 | 97.6 | 86.0 | 99.4 | 98.8  | 99.6 | 87.0    |
| 22 Random tree                                                                          | 53.3                                                                                                | 95.7 | 87.4 | 99.2 | 73.4 | 71.8 | 85.2 | 99.7 | 81.5  | 99.7 | 84.7    |
| 23 Naives Bayes                                                                         | 42.1                                                                                                | 90.7 | 68.7 | 98.4 | 45.9 | 98.2 | 81.0 | 97.1 | 97.3  | 99.7 | 81.9    |
| 24 Meta Filtered Classifier                                                             | 36.5                                                                                                | 95.2 | 92.2 | 98.8 | 38.2 | 92.2 | 72.0 | 99.4 | 85.4  | 96.7 | 80.7    |
| 25 NaiveBayes Updateable                                                                | 0.9                                                                                                 | 25.5 | 38.2 | 2.0  | 28.4 | 1.7  | 8.1  | 51.4 | 4.2   | 84.3 | 24.5    |
| 26 Attribute Selection Classifier                                                       | 0.4                                                                                                 | 30.7 | 25.7 | 0.5  | 23.6 | 1.4  | 4.1  | 18.5 | 4.9   | 72.4 | 18.2    |

SI Table 5b: Performance of the testing set with various classification algorithms - MCC

| Algorithm                         | Correlation Coefficient (%) |        |        |        |        |        |        |        |        |       | AVERAGE |
|-----------------------------------|-----------------------------|--------|--------|--------|--------|--------|--------|--------|--------|-------|---------|
|                                   | NEG                         | EDI    | GD7    | MHV    | MMV    | MYC    | PVM    | REO    | ECTRO  | SEN   |         |
| 1 Meta Class Classifier           | 59.2                        | 58.2   | 6.7    | 79.9   | 2.7    | 83.4   | 70.9   | 79.3   | 39.9   | 16.6  | 49.7    |
| 2 J48                             | 16.5                        | 32.0   | 5.2    | 77.6   | 18.8   | 25.3   | 11.0   | 38.4   | 16.3   | 40.2  | 28.1    |
| 3 Simple Logistic                 | 37.9                        | 35.1   | 27.5   | 62.2   | 2.9    | 80.1   | 8.4    | 55.8   | 46.1   | 45.0  | 40.1    |
| 4 SMO                             | 7.4                         | 25.1   | (0.7)  | 77.6   | 2.6    | 13.4   | 11.1   | 14.4   | 11.5   |       | 18.0    |
| 5 Multilayer Perception           | 14.7                        | 57.5   | (0.1)  | 83.3   | 10.1   | 52.4   | 14.8   | 47.8   | 25.7   | 19.0  | 32.5    |
| 6 Lazy ibk                        | 27.3                        | 58.0   | 11.0   | 88.2   | 7.9    | 73.1   | 24.1   | 65.4   | 38.2   | 6.5   | 40.0    |
| 7 LMT                             | 35.7                        | 42.2   | 23.0   | 25.4   | 0.5    | 73.6   | 30.1   | 49.9   | 44.6   | 27.0  | 35.2    |
| 8 Rules Decision table            | (10.2)                      | (2.0)  |        | 12.1   | 2.8    | (0.3)  |        | 25.0   |        |       | 4.6     |
| 9 Meta Bagging                    | 21.0                        | 59.9   | 29.5   | 45.3   | (2.3)  | 67.2   | 4.6    | 72.5   | 11.5   | 73.8  | 38.3    |
| 10 Meta Logi Boost                | 24.5                        | 65.1   | 31.0   | 38.2   | (2.1)  | 96.7   | 10.4   | 73.5   | 47.4   | 73.8  | 45.9    |
| 11 Kstar                          | 27.5                        | 62.0   | 35.9   | 24.2   | (2.5)  | 83.0   | 29.1   | 71.1   | 11.5   | 83.1  | 42.5    |
| 12 Rules PART                     | 27.6                        | 67.3   | 35.6   | 32.0   | (2.1)  | 84.9   | 29.1   | 40.3   | 11.5   | 85.4  | 41.2    |
| 13 REP Tree                       | 23.3                        | 59.3   | 29.7   | 45.3   | (2.0)  | 73.0   | 2.7    | 71.3   | 16.3   | 73.8  | 39.3    |
| 14 Meta Random Committee          | 23.2                        | 55.2   | 29.5   | 34.2   | (2.5)  | 73.9   | 2.6    | 72.5   |        | 14.1  | 33.6    |
| 15 Random Forest                  | 23.0                        | 57.7   | 26.8   | 40.1   | (2.6)  | 53.9   | 11.2   | 72.5   |        | 24.6  | 34.1    |
| 16 Random forest subspace         | 21.8                        | 60.0   | 29.3   | 7.5    | (2.3)  | 87.9   | (2.6)  | 28.6   | (0.2)  | 19.4  | 24.9    |
| 17 Classification via Regression  | 24.3                        | 44.2   | 24.4   | 11.3   | (1.6)  | 52.9   | 5.3    | 44.1   | 60.6   | 76.8  | 34.2    |
| 18 Logistic                       | 20.4                        | 34.8   | 4.2    | 89.2   | (2.1)  | 70.3   | 9.0    | 62.7   | 39.4   | 9.7   | 33.7    |
| 19 Rules One R                    | 0.4                         |        | 22.2   | (2.0)  | (3.6)  | (0.8)  | (5.9)  | (1.7)  |        | (1.0) | 0.9     |
| 20 Rules Zero R                   | 0.4                         |        | 22.2   | (2.0)  | (3.6)  | (0.8)  | (5.9)  | (1.7)  |        | (1.0) | 0.9     |
| 21 Bayesnet                       | 13.6                        | 14.4   | 22.2   | 2.1    | (5.1)  | 49.7   | (0.1)  | 33.2   | (0.5)  | 27.7  | 15.7    |
| 22 Random tree                    | 10.1                        | 36.7   | 28.8   | 32.0   | (3.5)  | 0.4    | 4.3    | 72.5   | (3.6)  | 21.3  | 19.9    |
| 23 Naives Bayes                   | 10.3                        | 8.6    | 9.5    | 3.9    | (7.9)  | 48.5   | (4.3)  | 8.7    | 5.7    | 48.3  | 13.1    |
| 24 Meta Filtered Classifier       | 0.5                         | 46.9   | 25.8   | 38.1   | (6.5)  | 5.8    | (15.4) | 61.1   | (4.0)  | 0.6   | 15.3    |
| 25 NaiveBayes Updateable          | (51.0)                      | (50.7) | (33.9) | (60.7) | (55.7) | (71.6) | (23.1) | (32.0) | (11.8) | 56.2  | (33.4)  |
| 26 Attribute Selection Classifier | (78.1)                      | (11.1) | (22.4) | (70.5) | (50.7) | (76.3) | (47.5) | (59.3) | (51.9) | 50.5  | (41.7)  |

Numbers in the parenthesis represent negative values.

| No | Classification Scheme          | References |
|----|--------------------------------|------------|
| 1  | Meta Class Classifier          | [1]        |
| 2  | J48                            | [2]        |
| 3  | Simple Logistic                | [3]        |
| 4  | SMO                            | [4]        |
| 5  | Multilayer Perception          | [5]        |
| 6  | Lazy ibk                       | [6]        |
| 7  | LMT                            | [7]        |
| 8  | Rules Decision table           | [8]        |
| 9  | Meta Bagging                   | [9]        |
| 10 | Meta Logi Boost                | [9]        |
| 11 | Kstar                          | [10]       |
| 12 | Rules PART                     | [11]       |
| 13 | REP Tree                       | [12]       |
| 14 | Meta Random Committee          | [13]       |
| 15 | Random Forest                  | [14]       |
| 16 | Random forest subspace         | [14]       |
| 17 | Classification via Regression  | [15]       |
| 18 | Logistic                       | [15]       |
| 19 | Rules One R                    | [16]       |
| 20 | Rules Zero R                   | [16]       |
| 21 | Bayesnet                       | [17,18]    |
| 22 | Random tree                    | [19]       |
| 23 | Naives Bayes                   | [20-22]    |
| 24 | Meta Filtered Classifier       | [9]        |
| 25 | NaiveBayes Updateable          | [20-22]    |
| 26 | Attribute Selection Classifier | [23]       |

1. Bergamo A, Torresani L, Meta-Class Features for Large-Scale Object Categorization on a Budget. Computer Vision and Pattern Recognition (CVPR) (2012) Meta-Class Features for Large-Scale Object Categorization on a Budget. Computer Vision and Pattern Recognition (CVPR), 2012 pp. 1-8.
2. Poropudas J, Virtanen K (2007) Analyzing air combat simulation results with dynamic Bayesian networks: IEEE Press. 1370-1377 p.
3. Landwehr N, Hall M, Frank E (2005) Logistic model trees. Machine Learning. Machine Learning 59: 161-205.
4. Keerthi SS, Shevade SK, Bhattacharyya C, Murthy KRK (2001) Improvements to Platt's SMO algorithm for SVM classifier design. . Neural Computation 13: 637-649.
5. Witten IH, Frank E, Hall MA (2011) Data mining : practical machine learning tools and techniques. Burlington, MA: Morgan Kaufmann. xxxiii, 629 p. p.

6. Beygelzimer A, Kakade S, Langford J. Cover trees for nearest neighbor; 2006. ACM. pp. 97-104.
7. Gama J (2004) Functional trees. *Machine Learning* 55: 219-250.
8. Kohavi R. A study of cross-validation and bootstrap for accuracy estimation and model selection; 1995. pp. 1137-1145.
9. Bauer E, Kohavi R (1999) An empirical comparison of voting classification algorithms: Bagging, boosting, and variants. *Machine learning* 36: 105-139.
10. Cleary JG, Trigg LE.  $K^*$ : An Instance-based Learner Using an Entropic Distance Measure; 1995. pp. 108-114.
11. Frank E, Witten IH (1998) Generating accurate rule sets without global optimization.
12. Furnkranz J, Widmer G. Incremental reduced error pruning; 1994. pp. 70-77.
13. Domingos P. Metacost: A general method for making classifiers cost-sensitive; 1999. ACM. pp. 155-164.
14. Breiman L (2001) Random forest. *Machine Learning* 45: 5-32.
15. Breiman L, Friedman J, Stone CJ, Olshen RA (1984) *Classification and regression trees*: CRC press.
16. Kohavi R (1995) The power of decision tables. *Machine Learning: ECML-95*: Springer. pp. 174-189.
17. Wu X, Kumar V (2009) *The top ten algorithms in data mining*. Boca Raton: CRC Press. xiii, 215 p. p.
18. Wu X, Kumar V, Ross Quinlan J, Ghosh J, Yang Q, et al. (2008) Top 10 algorithms in data mining. *Knowledge and Information Systems* 14: 1-37.
19. Webb GI. Decision tree grafting from the all-tests-but-one partition; 1999. Citeseer. pp. 702-707.
20. Jiang L, Zhang H (2006) Weightily averaged one-dependence estimators. *PRICAI 2006: trends in artificial intelligence*: Springer. pp. 970-974.
21. Zheng Z, Webb GI (2000) Lazy learning of Bayesian rules. *Machine Learning* 41: 53-84.
22. Zheng Z, Webb GI, Ting KM. Lazy Bayesian Rules: A lazy semi-naive Bayesian learning technique competitive to boosting decision trees; 1999. Citeseer.
23. Goldberg DE, Holland JH (1988) Genetic algorithms and machine learning. *Machine learning* 3: 95-99.
